# Supplementary material for: DNA methylation and gene expression changes derived from assisted reproductive technologies can be decreased by reproductive fluids
Source: eLife. 2017 Feb 1;6:e23670. doi: 10.7554/eLife.23670 (PMC5340525; doi:10.7554/eLife.23670)
Supplement: Figure 3—source data 1. — This data relates to Figure 3C. DOI: http://dx.doi.org/10.7554/eLife.23670.008 [file elife-23670-fig3-data1.xlsx]

## Sheet: All genes
Probe	Chromosome	Start	End	Strand	No value	Feature	ID	Description	Type	Orientation	Distance	C-IVF	Natur IVF	In vivo
37135	3	18363271	18376614	+	NaN	ZNF48	ENSSSCG00000007801	Uncharacterized protein [Source:UniProtKB/TrEMBL;Acc:F1RFI5]	gene	overlapping	0	-2.94738	-2.30222	-2.64773
37865	5	3698552	3721328	+	NaN	2003-09-01	ENSSSCG00000000040	Uncharacterized protein [Source:UniProtKB/TrEMBL;Acc:F1SJQ3]	gene	overlapping	0	-2.99805	-1.91822	-2.64773
38231	12	36033636	36043165	+	NaN	2004-09-01	ENSSSCG00000017643	Uncharacterized protein [Source:UniProtKB/TrEMBL;Acc:F1RRN6]	gene	overlapping	0	-2.99805	-2.20089	-1.9304
38596	14	54895791	54900461	+	NaN	2005-09-01	ENSSSCG00000010128	Uncharacterized protein [Source:UniProtKB/TrEMBL;Acc:F1RHN7]	gene	overlapping	0	-1.17341	-2.30222	-2.64773
38961	X	113565128	113631649	+	NaN	2006-09-01	ENSSSCG00000012619	Uncharacterized protein [Source:UniProtKB/TrEMBL;Acc:F1RUA1]	gene	overlapping	0	-2.99805	-2.30222	-2.64773
39326	18	41967526	42068931	-	NaN	2007-09-01	ENSSSCG00000016661	septin 7 [Source:HGNC Symbol;Acc:1717]	gene	overlapping	0	7.55688	7.42025	8.13148
39692	2	140556381	140561689	-	NaN	2008-09-01	ENSSSCG00000014285	Uncharacterized protein [Source:UniProtKB/TrEMBL;Acc:F1RJU9]	gene	overlapping	0	2.97598	2.04052	2.72263
40057	12	4003723	4153387	-	NaN	2009-09-01	ENSSSCG00000017168	Uncharacterized protein [Source:UniProtKB/TrEMBL;Acc:F1RZ71]	gene	overlapping	0	-2.89672	1.15805	0.00155528
40422	3	47790819	47829498	+	NaN	2010-09-01	ENSSSCG00000023050	septin 10 [Source:HGNC Symbol;Acc:14349]	gene	overlapping	0	3.69801	3.26298	3.40361
40787	8	76838237	76877090	+	NaN	2011-09-01	ENSSSCG00000008986	Uncharacterized protein [Source:UniProtKB/TrEMBL;Acc:F1RYS5]	gene	overlapping	0	5.13391	4.6053	5.22664
41153	3	38677800	38688095	+	NaN	2012-09-01	ENSSSCG00000007933	Uncharacterized protein [Source:UniProtKB/TrEMBL;Acc:F1RK75]	gene	overlapping	0	-2.99805	-2.30222	-2.64773
41883	3	17282312	17317249	+	NaN	2014-09-01	ENSSSCG00000007751	Uncharacterized protein [Source:UniProtKB/TrEMBL;Acc:F1RIT8]	gene	overlapping	0	-2.99805	-2.30222	-2.64773
2AAA_PIG	6	52233183	52268707	-	NaN	PPP2R1A	ENSSSCG00000024413	Serine/threonine-protein phosphatase 2A 65 kDa regulatory subunit A alpha isoform [Source:UniProtKB/Swiss-Prot;Acc:P54612]	gene	overlapping	0	3.84092	3.25387	3.52674
2AAB_PIG	9	44269854	44307126	-	NaN	PPP2R1B	ENSSSCG00000029538	Serine/threonine-protein phosphatase 2A 65 kDa regulatory subunit A beta isoform [Source:UniProtKB/Swiss-Prot;Acc:P54613]	gene	overlapping	0	2.85773	3.87261	3.41216
2ABA_PIG	14	11360498	11448854	+	NaN	PPP2R2A	ENSSSCG00000009657	Serine/threonine-protein phosphatase 2A 55 kDa regulatory subunit B alpha isoform [Source:UniProtKB/Swiss-Prot;Acc:Q29090]	gene	overlapping	0	5.09396	5.22864	6.17636
2ABB_PIG	2	154430378	154704328	-	NaN	PPP2R2B	ENSSSCG00000028976	Serine/threonine-protein phosphatase 2A 55 kDa regulatory subunit B beta isoform [Source:UniProtKB/Swiss-Prot;Acc:P54614]	gene	overlapping	0	-2.99805	-2.30222	-2.64773
3BHS_PIG	4	111555569	111564384	-	NaN	HSD3B	ENSSSCG00000006719	3 beta-hydroxysteroid dehydrogenase/Delta 5-->4-isomerase 3-beta-hydroxy-Delta(5)-steroid dehydrogenase Steroid Delta-isomerase [Source:UniProtKB/Swiss-Prot;Acc:Q9N119]	gene	overlapping	0	-2.99805	-2.30222	-2.64773
5HT1B_PIG	1	99465592	99466764	+	NaN	HTR1B	ENSSSCG00000004475	5-hydroxytryptamine receptor 1B [Source:UniProtKB/Swiss-Prot;Acc:P79399]	gene	overlapping	0	-2.08573	-2.25156	-2.59706
5HT1D_PIG	6	75189714	75190847	+	NaN	HTR1D	ENSSSCG00000025500	5-hydroxytryptamine receptor 1D [Source:UniProtKB/Swiss-Prot;Acc:P79400]	gene	overlapping	0	-2.99805	0.861837	1.53541
5HT1E_PIG	1	61986692	61987921	-	NaN	HTR1E	ENSSSCG00000004295	5-hydroxytryptamine receptor 1E [Source:UniProtKB/Swiss-Prot;Acc:Q29003]	gene	overlapping	0	-1.7139	-2.30222	-2.64773
5HT2A_PIG	11	20896282	20956369	+	NaN	HTR2A	ENSSSCG00000009406	5-hydroxytryptamine receptor 2A [Source:UniProtKB/Swiss-Prot;Acc:P50129]	gene	overlapping	0	-2.99805	-2.30222	-2.64773
5HT2B_PIG	15	145562110	145576395	-	NaN	HTR2B	ENSSSCG00000016273	5-hydroxytryptamine receptor 2B [Source:UniProtKB/Swiss-Prot;Acc:Q29005]	gene	overlapping	0	0.870535	0.48541	0.273414
5HT4R_PIG	2	156451710	156556790	-	NaN	5-HT4R	ENSSSCG00000014428	5-hydroxytryptamine receptor 4 [Source:UniProtKB/Swiss-Prot;Acc:Q29006]	gene	overlapping	0	-2.41906	-2.30222	-1.82309
6PGD_PIG	6	64609321	64625096	+	NaN	PGD	ENSSSCG00000003402	6-phosphogluconate dehydrogenase, decarboxylating [Source:UniProtKB/Swiss-Prot;Acc:P14332]	gene	overlapping	0	4.08578	3.63592	1.8955
7B2_PIG	1	152695780	152712187	+	NaN	SCG5	ENSSSCG00000004807	Neuroendocrine protein 7B2 N-terminal peptide C-terminal peptide [Source:UniProtKB/Swiss-Prot;Acc:P01165]	gene	overlapping	0	-2.99805	-2.30222	-2.64773
A1AT_PIG	7	122616093	122621528	-	NaN	SERPINA1	ENSSSCG00000002476	Alpha-1-antitrypsin [Source:UniProtKB/Swiss-Prot;Acc:P50447]	gene	overlapping	0	-2.99805	-2.30222	-2.64773
A1BG	6	57653259	57657524	-	NaN	A1BG	ENSSSCG00000004001	alpha-1-B glycoprotein [Source:HGNC Symbol;Acc:5]	gene	overlapping	0	-2.99805	-1.72323	-2.64773
A1CF	14	107777595	107848261	+	NaN	A1CF	ENSSSCG00000010431	Uncharacterized protein [Source:UniProtKB/TrEMBL;Acc:F1SD00]	gene	overlapping	0	-2.99805	-2.30222	-2.64773
A2LD1	11	76549455	76549907	-	NaN	A2LD1	ENSSSCG00000009523	Uncharacterized protein [Source:UniProtKB/TrEMBL;Acc:F1RP13]	gene	overlapping	0	-2.99805	-2.30222	-2.64773
A2M	5	65275226	65320249	+	NaN	A2M	ENSSSCG00000000660	Uncharacterized protein [Source:UniProtKB/TrEMBL;Acc:F1SLX2]	gene	overlapping	0	-2.36839	-2.25156	-1.23458
A2ML1	5	65445195	65479118	-	NaN	A2ML1	ENSSSCG00000000664	alpha-2-macroglobulin-like 1 [Source:HGNC Symbol;Acc:23336]	gene	overlapping	0	-2.99805	0.443566	-2.64773
A4_PIG	13	199291020	199568630	-	NaN	APP	ENSSSCG00000012022	Amyloid beta A4 protein N-APP Soluble APP-alpha Soluble APP-beta C99 Beta-amyloid protein 42 Beta-amyloid protein 40 C83 P3(42) P3(40) C80 Gamma-secretase C-terminal fragment 59 Gamma-secretase C-terminal fragment 57 Gamma-secretase C-terminal fragment 50 C31 [Source:UniProtKB/Swiss-Prot;Acc:P79307]	gene	overlapping	0	2.58541	1.36186	-0.684743
A4GALT	5	3561303	3562382	+	NaN	A4GALT	ENSSSCG00000026962	alpha 1,4-galactosyltransferase [Source:HGNC Symbol;Acc:18149]	gene	overlapping	0	-2.99805	-2.30222	-2.64773
A4GNT	13	86525137	86533319	+	NaN	ENSSSCG00000025785	ENSSSCG00000025785	No description	gene	overlapping	0	-2.89672	-2.25156	-1.87973
AAAS	5	18959631	18973572	-	NaN	C12ORF10	ENSSSCG00000000267	Uncharacterized protein [Source:UniProtKB/TrEMBL;Acc:F1SFR1]	gene	overlapping	0	4.1624	3.91336	4.4416
AACS	14	29816548	29871769	-	NaN	AACS	ENSSSCG00000009755	Uncharacterized protein [Source:UniProtKB/TrEMBL;Acc:F1RFP8]	gene	overlapping	0	4.24499	2.99104	2.01024
AADACL3	6	66811588	66815111	+	NaN	AADACL3	ENSSSCG00000003441	Uncharacterized protein [Source:UniProtKB/TrEMBL;Acc:F1RF57]	gene	overlapping	0	-2.99805	-2.30222	-2.64773
AADACL4	6	66764385	66779637	+	NaN	AADACL4	ENSSSCG00000003440	Uncharacterized protein [Source:UniProtKB/TrEMBL;Acc:F1RF59]	gene	overlapping	0	-2.99805	-2.30222	-2.64773
AADAT	14	21067835	21091630	+	NaN	AADAT	ENSSSCG00000009708	Uncharacterized protein [Source:UniProtKB/TrEMBL;Acc:F1RIZ5]	gene	overlapping	0	-2.99805	-1.09358	-0.784596
AADC	9	150076905	150234100	-	NaN	AADC	ENSSSCG00000022009	Aromatic-L-amino-acid decarboxylase [Source:UniProtKB/Swiss-Prot;Acc:P80041]	gene	overlapping	0	-2.99805	-2.30222	-2.64773
AAGAB	1	182853801	182893684	+	NaN	AAGAB	ENSSSCG00000004951	Uncharacterized protein [Source:UniProtKB/TrEMBL;Acc:F1SJJ1]	gene	overlapping	0	5.38255	5.00151	6.159
AAK1_PIG	3	76229711	76390236	+	NaN	AAK1	ENSSSCG00000008337	AP2-associated protein kinase 1 [Source:UniProtKB/Swiss-Prot;Acc:F1SPM8]	gene	overlapping	0	5.69028	5.25054	4.12876
AAKB1_PIG	14	35147993	35163200	-	NaN	PRKAB1	ENSSSCG00000009840	5'-AMP-activated protein kinase subunit beta-1 [Source:UniProtKB/Swiss-Prot;Acc:P80387]	gene	overlapping	0	1.05956	1.76808	1.68785
AAKG1_PIG	5	15443377	15522457	-	NaN	PRKAG1	ENSSSCG00000000185	5'-AMP-activated protein kinase subunit gamma-1 [Source:UniProtKB/Swiss-Prot;Acc:Q09138]	gene	overlapping	0	2.12728	0.0643984	0.425895
AAKG3_PIG	15	133800767	133807019	+	NaN	ENSSSCG00000026964	ENSSSCG00000026964	No description	gene	overlapping	0	-2.99805	-2.30222	-2.64773
AANAT	12	4894855	4896036	-	NaN	AANAT	ENSSSCG00000017176	Uncharacterized protein [Source:UniProtKB/TrEMBL;Acc:F1RWP8]	gene	overlapping	0	-2.99805	-2.30222	-2.64773
AAPK2_PIG	6	143547628	143573947	+	NaN	PRKAA2	ENSSSCG00000003837	5'-AMP-activated protein kinase catalytic subunit alpha-2 [Source:UniProtKB/Swiss-Prot;Acc:Q28948]	gene	overlapping	0	2.34153	0.0137307	-1.10575
AARS	6	13363477	13385173	-	NaN	AARS	ENSSSCG00000002723	Uncharacterized protein [Source:UniProtKB/TrEMBL;Acc:F1S431]	gene	overlapping	0	7.25581	6.45032	5.74944
AARS2	7	45170562	45183626	-	NaN	AARS2	ENSSSCG00000001706	Uncharacterized protein [Source:UniProtKB/TrEMBL;Acc:F1RQT7]	gene	overlapping	0	1.50729	1.89736	3.04082
AASDH	8	57901297	57913038	-	NaN	AASDH	ENSSSCG00000027403	aminoadipate-semialdehyde dehydrogenase [Source:HGNC Symbol;Acc:23993]	gene	overlapping	0	1.69775	3.30952	2.87067
AASDHPPT	9	39939906	39984846	+	NaN	AASDHPPT	ENSSSCG00000014998	Uncharacterized protein [Source:UniProtKB/TrEMBL;Acc:F1SV35]	gene	overlapping	0	5.33599	5.6486	4.72861
AASS	18	26579424	26641256	+	NaN	AASS	ENSSSCG00000016613	Uncharacterized protein [Source:UniProtKB/TrEMBL;Acc:F1SLX5]	gene	overlapping	0	7.38269	6.64464	6.02728
AATC_PIG	14	120043225	120080894	-	NaN	GOT1	ENSSSCG00000010537	Aspartate aminotransferase, cytoplasmic [Source:UniProtKB/Swiss-Prot;Acc:P00503]	gene	overlapping	0	6.39245	6.8041	6.55677
AATF	12	40078731	40180475	+	NaN	AATF	ENSSSCG00000017693	Uncharacterized protein [Source:UniProtKB/TrEMBL;Acc:F1S1B7]	gene	overlapping	0	3.67344	2.83137	4.69029
AATK	12	1479054	1514172	+	NaN	AATK	ENSSSCG00000017141	Uncharacterized protein [Source:UniProtKB/TrEMBL;Acc:F1RZY5]	gene	overlapping	0	-2.99805	-2.30222	-2.64773
AATM_PIG	6	18501596	18505569	-	NaN	GOT2	ENSSSCG00000002797	Aspartate aminotransferase, mitochondrial [Source:UniProtKB/Swiss-Prot;Acc:P00506]	gene	overlapping	0	2.30602	0.971887	2.07267
ABCA1	1	275740052	275862912	-	NaN	ABCA1	ENSSSCG00000005423	Uncharacterized protein [Source:UniProtKB/TrEMBL;Acc:F1SP55]	gene	overlapping	0	3.17126	4.23715	1.85103
ABCA12	15	129788576	129792848	-	NaN	ABCA12	ENSSSCG00000016172	ATP-binding cassette, sub-family A (ABC1), member 12 [Source:HGNC Symbol;Acc:14637]	gene	overlapping	0	-0.910262	-2.30222	-2.64773
ABCA13	9	148690451	148904043	+	NaN	ABCA13	ENSSSCG00000029907	ATP-binding cassette, sub-family A (ABC1), member 13 [Source:HGNC Symbol;Acc:14638]	gene	overlapping	0	-2.99805	-2.30222	-2.64773
ABCA2	9	148810272	148818209	+	NaN	ABCA13	ENSSSCG00000029907	ATP-binding cassette, sub-family A (ABC1), member 13 [Source:HGNC Symbol;Acc:14638]	gene	overlapping	0	-2.99805	-2.30222	-2.64773
ABCA3	3	42433372	42466318	-	NaN	ABCA3	ENSSSCG00000008051	Uncharacterized protein [Source:UniProtKB/TrEMBL;Acc:F1RFA0]	gene	overlapping	0	-1.31175	-1.72323	-2.64773
ABCA4	4	134846031	134978491	+	NaN	ABCA4	ENSSSCG00000006890	Uncharacterized protein [Source:UniProtKB/TrEMBL;Acc:F1S539]	gene	overlapping	0	0.505713	-1.53422	-2.64773
ABCA5	12	11441875	11488394	-	NaN	ABCA5	ENSSSCG00000017255	ATP-binding cassette, sub-family A (ABC1), member 5 [Source:HGNC Symbol;Acc:35]	gene	overlapping	0	0.40891	-0.898591	-2.26373
ABCA7	2	77623480	77640489	+	NaN	ABCA7	ENSSSCG00000023121	ATP-binding cassette, sub-family A (ABC1), member 7 [Source:HGNC Symbol;Acc:37]	gene	overlapping	0	-0.763405	2.19034	-0.341493
ABCA9	12	11732391	11787345	-	NaN	ABCA9	ENSSSCG00000017257	Uncharacterized protein [Source:UniProtKB/TrEMBL;Acc:F1RV25]	gene	overlapping	0	-2.99805	-2.30222	-2.64773
ABCB10	14	65132848	65168740	+	NaN	ABCB10	ENSSSCG00000010188	Uncharacterized protein [Source:UniProtKB/TrEMBL;Acc:F1RG41]	gene	overlapping	0	4.30439	4.32664	3.63493
ABCB11	15	84507649	84580307	-	NaN	ABCB11	ENSSSCG00000015926	Uncharacterized protein [Source:UniProtKB/TrEMBL;Acc:F1S1W3]	gene	overlapping	0	-2.99805	-2.30222	-2.64773
ABCB4	9	102651943	102741185	+	NaN	ABCB4	ENSSSCG00000024520	ATP-binding cassette subfamily B member 4 [Source:UniProtKB/TrEMBL;Acc:A0SZY7]	gene	overlapping	0	-2.99805	-2.25156	-2.64773
ABCB5	9	98881828	99033248	+	NaN	ABCB5	ENSSSCG00000015377	ATP-binding cassette, sub-family B (MDR/TAP), member 5 [Source:HGNC Symbol;Acc:46]	gene	overlapping	0	0.735564	-0.621899	-2.64773
ABCB6	15	134280965	134288809	-	NaN	GLB1L	ENSSSCG00000016213	Uncharacterized protein [Source:UniProtKB/TrEMBL;Acc:F1SR82]	gene	overlapping	0	4.13114	4.70636	3.78081
ABCB7	X	68395529	68522041	-	NaN	ABCB7	ENSSSCG00000012424	Uncharacterized protein [Source:UniProtKB/TrEMBL;Acc:F1RPJ8]	gene	overlapping	0	5.37046	5.66161	5.32478
ABCB8	18	6548565	6567036	-	NaN	ABCB8	ENSSSCG00000027986	ATP-binding cassette, sub-family B (MDR/TAP), member 8 [Source:HGNC Symbol;Acc:49]	gene	overlapping	0	4.43196	3.75184	3.74645
ABCB9	14	31598472	31624415	+	NaN	ABCB9	ENSSSCG00000009784	Uncharacterized protein [Source:UniProtKB/TrEMBL;Acc:F1RFJ4]	gene	overlapping	0	-2.99805	-1.31577	-2.64773
ABCC1	3	29068053	29172715	-	NaN	ABCC1	ENSSSCG00000007874	Uncharacterized protein [Source:UniProtKB/TrEMBL;Acc:F1RLT0]	gene	overlapping	0	-2.41906	-1.25156	-2.64773
ABCC10	7	44031796	44034508	+	NaN	ABCC10	ENSSSCG00000001681	Uncharacterized protein [Source:UniProtKB/TrEMBL;Acc:F1RRK7]	gene	overlapping	0	-2.99805	-2.30222	-2.64773
ABCC2	14	120400796	120478568	+	NaN	ABCC2	ENSSSCG00000010543	Uncharacterized protein [Source:UniProtKB/TrEMBL;Acc:F1S8V9]	gene	overlapping	0	5.85427	7.03525	3.81081
ABCC3	12	27060902	27116379	+	NaN	ABCC3	ENSSSCG00000017561	ATP-binding cassette, sub-family C (CFTR/MRP), member 3 [Source:HGNC Symbol;Acc:54]	gene	overlapping	0	-2.99805	-2.30222	-2.64773
ABCC8	2	44725269	44812585	+	NaN	ABCC8	ENSSSCG00000013378	Uncharacterized protein [Source:UniProtKB/TrEMBL;Acc:F1S9A6]	gene	overlapping	0	-2.99805	-2.30222	-2.64773
ABCC9	5	54823630	54944107	+	NaN	ABCC9	ENSSSCG00000000571	Uncharacterized protein [Source:UniProtKB/TrEMBL;Acc:F1SR11]	gene	overlapping	0	-2.99805	-2.30222	-2.64773
ABCD1	X	142049626	142067496	+	NaN	ABCD1	ENSSSCG00000012779	ATP-binding cassette, sub-family D (ALD), member 1 [Source:HGNC Symbol;Acc:61]	gene	overlapping	0	2.57499	1.80605	1.39743
ABCD2	5	73682139	73741175	-	NaN	ABCD2	ENSSSCG00000000781	Uncharacterized protein [Source:UniProtKB/TrEMBL;Acc:F1SHQ1]	gene	overlapping	0	-2.99805	-2.25156	-2.64773
ABCE1	8	88572091	88623724	-	NaN	ABCE1	ENSSSCG00000009043	Uncharacterized protein [Source:UniProtKB/TrEMBL;Acc:F1RS49]	gene	overlapping	0	6.54652	6.39044	7.10428
ABCF1_PIG	7	26795822	26815071	+	NaN	ABCF1	ENSSSCG00000001346	ATP-binding cassette sub-family F member 1 [Source:UniProtKB/Swiss-Prot;Acc:Q767L0]	gene	overlapping	0	5.46768	5.41277	6.30244
ABCF2	18	6372036	6380650	+	NaN	ABCF2	ENSSSCG00000016441	Uncharacterized protein [Source:UniProtKB/TrEMBL;Acc:F1SSL4]	gene	overlapping	0	2.91072	3.19517	3.50958
ABCF3	13	131545213	131553863	+	NaN	ABCF3	ENSSSCG00000028856	ATP-binding cassette, sub-family F (GCN20), member 3 [Source:HGNC Symbol;Acc:72]	gene	overlapping	0	2.92158	3.64786	3.55615
ABCG1	13	215898402	215958339	+	NaN	ABCG1	ENSSSCG00000027745	ATP-binding cassette, sub-family G (WHITE), member 1 [Source:HGNC Symbol;Acc:73]	gene	overlapping	0	-2.99805	-2.30222	-2.64773
ABCG2_PIG	8	140193310	140228767	+	NaN	ABCG2	ENSSSCG00000009213	ATP-binding cassette sub-family G member 2 [Source:UniProtKB/Swiss-Prot;Acc:Q8MIB3]	gene	overlapping	0	6.30735	6.26957	4.15015
ABCG4	9	51400015	51415695	+	NaN	ABCG4	ENSSSCG00000015113	Uncharacterized protein [Source:UniProtKB/TrEMBL;Acc:F1SAH2]	gene	overlapping	0	-2.99805	-1.47758	-2.26373
ABCG5	3	102777467	102782638	+	NaN	ABCG5	ENSSSCG00000008454	ATP-binding cassette, sub-family G (WHITE), member 5 [Source:HGNC Symbol;Acc:13886]	gene	overlapping	0	-2.99805	-2.30222	-2.64773
ABCG8	3	102752610	102768397	-	NaN	ABCG8	ENSSSCG00000008453	Uncharacterized protein [Source:UniProtKB/TrEMBL;Acc:F1S5I9]	gene	overlapping	0	-2.99805	-2.30222	-2.64773
ABHD1	3	118992527	119000532	-	NaN	PREB	ENSSSCG00000008553	Uncharacterized protein [Source:UniProtKB/TrEMBL;Acc:F1SED4]	gene	overlapping	0	2.59694	1.19057	2.60099
ABHD11	3	10696086	10700133	-	NaN	ABHD11	ENSSSCG00000007715	Uncharacterized protein [Source:UniProtKB/TrEMBL;Acc:F1RJM8]	gene	overlapping	0	4.86687	4.3051	4.17163
ABHD12B	1	200923408	200948869	+	NaN	ABHD12B	ENSSSCG00000005023	Uncharacterized protein [Source:UniProtKB/TrEMBL;Acc:F1SFF9]	gene	overlapping	0	1.95139	2.63352	-0.308315
ABHD13	11	82962703	82981428	+	NaN	ABHD13	ENSSSCG00000009541	Uncharacterized protein [Source:UniProtKB/TrEMBL;Acc:F1RLP0]	gene	overlapping	0	2.68078	1.11023	2.94067
ABHD14B	13	37296619	37300549	-	NaN	ABHD14B	ENSSSCG00000026847	abhydrolase domain containing 14B [Source:HGNC Symbol;Acc:28235]	gene	overlapping	0	3.38105	2.69056	3.92807
ABHD15	12	47708133	47713196	-	NaN	ABHD15	ENSSSCG00000017789	Uncharacterized protein [Source:UniProtKB/TrEMBL;Acc:F1RN85]	gene	overlapping	0	-1.32806	-2.30222	-2.64773
ABHD2	7	59631041	59745342	+	NaN	ABHD2	ENSSSCG00000001835	Uncharacterized protein [Source:UniProtKB/TrEMBL;Acc:F1SKQ2]	gene	overlapping	0	2.10907	2.978	-0.850576
ABHD3	6	99355423	99401229	-	NaN	ABHD3	ENSSSCG00000028010	abhydrolase domain containing 3 [Source:HGNC Symbol;Acc:18718]	gene	overlapping	0	1.28329	-2.25156	-1.73541
ABHD4	7	81641000	81656264	-	NaN	ABHD4	ENSSSCG00000002051	Uncharacterized protein [Source:UniProtKB/TrEMBL;Acc:F1S9A3]	gene	overlapping	0	6.63092	5.47739	1.87704
ABHD5_PIG	13	29833568	29883671	+	NaN	ABHD5	ENSSSCG00000011297	1-acylglycerol-3-phosphate O-acyltransferase ABHD5 [Source:UniProtKB/Swiss-Prot;Acc:Q5EE05]	gene	overlapping	0	4.0457	4.8785	5.66484
ABHD6	13	43854445	44014598	+	NaN	ABHD6	ENSSSCG00000011470	Uncharacterized protein [Source:UniProtKB/TrEMBL;Acc:F1SGJ4]	gene	overlapping	0	-0.585594	1.28285	-1.48975
ABI2	15	118142433	118177457	-	NaN	ABI2	ENSSSCG00000027006	abl-interactor 2 [Source:HGNC Symbol;Acc:24011]	gene	overlapping	0	-1.84605	-2.30222	-1.38842
ABI3	12	25368698	25383610	+	NaN	ABI3	ENSSSCG00000027677	ABI family, member 3 [Source:HGNC Symbol;Acc:29859]	gene	overlapping	0	-1.89074	-2.30222	-2.01808
ABI3BP	13	167514212	167515102	-	NaN	ABI3BP	ENSSSCG00000021687	ABI family, member 3 (NESH) binding protein [Source:HGNC Symbol;Acc:17265]	gene	overlapping	0	-2.99805	-2.30222	-2.64773
ABL1	1	304685889	304829672	+	NaN	ABL1	ENSSSCG00000005706	Uncharacterized protein [Source:UniProtKB/TrEMBL;Acc:F1S0X4]	gene	overlapping	0	0.374545	-0.0701156	3.29549
ABL2	9	132671844	132782759	-	NaN	ABL2	ENSSSCG00000024674	v-abl Abelson murine leukemia viral oncogene homolog 2 [Source:HGNC Symbol;Acc:77]	gene	overlapping	0	5.45513	4.43708	4.81243
ABLIM1	14	135884829	136136366	-	NaN	ABLIM1	ENSSSCG00000010651	actin binding LIM protein 1 [Source:HGNC Symbol;Acc:78]	gene	overlapping	0	0.378094	-0.491127	0.647755
ABLIM2	8	4181765	4299679	+	NaN	ABLIM2	ENSSSCG00000008721	actin binding LIM protein family, member 2 [Source:HGNC Symbol;Acc:19195]	gene	overlapping	0	-2.99805	-2.30222	-2.64773
ABLIM3	2	157099050	157184617	+	NaN	ABLIM3	ENSSSCG00000014430	Uncharacterized protein [Source:UniProtKB/TrEMBL;Acc:F1RLA7]	gene	overlapping	0	-1.61405	-1.20089	-2.64773
ABP1	18	6741198	6750279	+	NaN	ABP1	ENSSSCG00000016442	Amine oxidase [Source:UniProtKB/TrEMBL;Acc:F1SSL3]	gene	overlapping	0	-2.99805	-2.30222	-2.06874
ABR	12	48950852	49020532	-	NaN	ABR	ENSSSCG00000017804	active BCR-related [Source:HGNC Symbol;Acc:81]	gene	overlapping	0	3.08236	2.19115	0.382904
ABRA_PIG	4	33354419	33361711	+	NaN	ABRA	ENSSSCG00000006036	Actin-binding Rho-activating protein [Source:UniProtKB/Swiss-Prot;Acc:B5SNZ6]	gene	overlapping	0	-2.99805	-2.25156	-2.64773
ABTB1	13	80092324	80097094	-	NaN	ABTB1	ENSSSCG00000024827	ankyrin repeat and BTB (POZ) domain containing 1 [Source:HGNC Symbol;Acc:18275]	gene	overlapping	0	-2.94738	-2.30222	-2.64773
ABTB2	2	28946535	29149593	+	NaN	ABTB2	ENSSSCG00000013303	Uncharacterized protein [Source:UniProtKB/TrEMBL;Acc:F1SGS8]	gene	overlapping	0	2.45925	2.59121	1.29902
ACAA	13	25168719	25179429	-	NaN	ACAA	ENSSSCG00000011250	Uncharacterized protein [Source:UniProtKB/TrEMBL;Acc:F1RRB7]	gene	overlapping	0	5.27872	4.2903	4.08905
ACACA	12	40200509	40367985	-	NaN	ACACA	ENSSSCG00000017694	acetyl-CoA carboxylase alpha [Source:HGNC Symbol;Acc:84]	gene	overlapping	0	3.66916	3.90062	2.54142
ACACA	12	40369503	40369727	+	NaN	ACACA	ENSSSCG00000017695	Acetyl-CoA carboxylase alpha; Uncharacterized protein [Source:UniProtKB/TrEMBL;Acc:Q9MZA8]	gene	overlapping	0	-2.41906	-1.86755	-2.64773
ACAD10	14	34963059	34971540	-	NaN	ENSSSCG00000009837	ENSSSCG00000009837	Uncharacterized protein [Source:UniProtKB/TrEMBL;Acc:F1RL47]	gene	overlapping	0	3.19481	0.99535	2.54088
ACAD11	13	81305209	81403413	-	NaN	ACAD11	ENSSSCG00000011629	acyl-CoA dehydrogenase family, member 11 [Source:HGNC Symbol;Acc:30211]	gene	overlapping	0	2.93806	2.10474	2.07654
ACAD8	9	67348892	67366488	-	NaN	ACAD8	ENSSSCG00000028123	acyl-CoA dehydrogenase family, member 8 [Source:HGNC Symbol;Acc:87]	gene	overlapping	0	0.973763	0.680397	-0.577433
ACAD8	9	67489895	67496759	-	NaN	ENSSSCG00000025707	ENSSSCG00000025707	No description	gene	overlapping	0	-0.543751	-1.67257	-1.82309
ACAD9	13	79004139	79019577	+	NaN	ACAD9	ENSSSCG00000023354	acyl-CoA dehydrogenase family, member 9 [Source:HGNC Symbol;Acc:21497]	gene	overlapping	0	3.42317	2.87312	3.5974
ACADL_PIG	15	124758368	124793429	-	NaN	ACADL	ENSSSCG00000016156	Long-chain specific acyl-CoA dehydrogenase, mitochondrial [Source:UniProtKB/Swiss-Prot;Acc:P79274]	gene	overlapping	0	2.96896	2.78771	3.66682
ACADM_PIG	6	127513773	127548453	-	NaN	ACADM	ENSSSCG00000003776	Medium-chain specific acyl-CoA dehydrogenase, mitochondrial [Source:UniProtKB/Swiss-Prot;Acc:P41367]	gene	overlapping	0	6.09709	6.31357	5.60919
ACADS_PIG	14	43110575	43124766	+	NaN	ACADS	ENSSSCG00000009916	Short-chain specific acyl-CoA dehydrogenase, mitochondrial [Source:UniProtKB/Swiss-Prot;Acc:P79273]	gene	overlapping	0	4.14952	3.83479	3.20829
ACADSB	14	144174274	144190924	+	NaN	ACADSB	ENSSSCG00000010723	Uncharacterized protein [Source:UniProtKB/TrEMBL;Acc:F1SED0]	gene	overlapping	0	3.2891	3.53033	4.10846
ACADVL	3	139851902	139857146	+	NaN	ACADVL	ENSSSCG00000020972	Uncharacterized protein [Source:UniProtKB/TrEMBL;Acc:F1ST43]	gene	overlapping	0	4.09106	3.95047	4.17159
ACADVL	12	54859685	54863767	-	NaN	ACADVL	ENSSSCG00000017947	Uncharacterized protein [Source:UniProtKB/TrEMBL;Acc:F1ST43]	gene	overlapping	0	-2.28072	-2.30222	-2.64773
ACAP1	12	54904770	54915794	+	NaN	ACAP1	ENSSSCG00000017943	ArfGAP with coiled-coil, ankyrin repeat and PH domains 1 [Source:HGNC Symbol;Acc:16467]	gene	overlapping	0	-1.84007	-2.30222	-2.64773
ACAP3	6	58048101	58058468	-	NaN	ACAP3	ENSSSCG00000003329	ArfGAP with coiled-coil, ankyrin repeat and PH domains 3 [Source:HGNC Symbol;Acc:16754]	gene	overlapping	0	-1.53423	-2.30222	-2.26373
ACAT1	9	40601622	40622159	+	NaN	ACAT1	ENSSSCG00000026153	acetyl-CoA acetyltransferase 1 [Source:HGNC Symbol;Acc:93]	gene	overlapping	0	7.68896	6.11376	6.16801
ACAT2	1	9399577	9411773	-	NaN	TCP1	ENSSSCG00000004048	T-complex protein 1 subunit alpha [Source:RefSeq peptide;Acc:NP_001230356]	gene	overlapping	0	7.77529	7.71857	6.66449
ACBD3	10	15702866	15723221	+	NaN	ACBD3	ENSSSCG00000020698	acyl-CoA binding domain containing 3 [Source:HGNC Symbol;Acc:15453]	gene	overlapping	0	3.39466	3.8262	4.22437
ACBD4	12	18522110	18528796	-	NaN	ACBD4	ENSSSCG00000017337	Uncharacterized protein [Source:UniProtKB/TrEMBL;Acc:F1RR18]	gene	overlapping	0	-2.99805	-2.30222	-2.64773
ACBD6	9	133728651	133933446	-	NaN	ACBD6	ENSSSCG00000015534	Uncharacterized protein [Source:UniProtKB/TrEMBL;Acc:F1S683]	gene	overlapping	0	2.41242	2.75135	2.91941
ACBP_PIG	15	28578032	28584893	+	NaN	DBI	ENSSSCG00000023435	Acyl-CoA-binding protein DBI(32-86) [Source:UniProtKB/Swiss-Prot;Acc:P12026]	gene	overlapping	0	7.86058	7.4936	7.29473
ACCN3	5	16354868	16364821	-	NaN	ACCN3	ENSSSCG00000000216	Uncharacterized protein [Source:UniProtKB/TrEMBL;Acc:F1SH99]	gene	overlapping	0	-0.548584	1.3667	-2.64773
ACCN5	8	46642261	46670059	-	NaN	ACCN5	ENSSSCG00000008869	Uncharacterized protein [Source:UniProtKB/TrEMBL;Acc:F1RW99]	gene	overlapping	0	-2.99805	-2.30222	-2.64773
ACCS	2	19858835	19877379	-	NaN	ACCS	ENSSSCG00000013282	Uncharacterized protein [Source:UniProtKB/TrEMBL;Acc:F1SHI0]	gene	overlapping	0	-2.99805	-2.30222	-2.64773
ACCSL	2	19881728	19891819	-	NaN	ACCSL	ENSSSCG00000013283	Uncharacterized protein [Source:UniProtKB/TrEMBL;Acc:F1SHH9]	gene	overlapping	0	-2.61405	-1.04774	-0.561665
ACER1	2	73307568	73331040	+	NaN	ACER1	ENSSSCG00000023969	alkaline ceramidase 1 [Source:HGNC Symbol;Acc:18356]	gene	overlapping	0	-2.99805	-2.30222	-2.64773
ACER2	1	227035726	227065829	-	NaN	ACER2	ENSSSCG00000026955	Uncharacterized protein [Source:UniProtKB/TrEMBL;Acc:F1SNG0]	gene	overlapping	0	-0.709584	1.37622	-1.30074
ACER3	9	12137833	12187150	+	NaN	ACER3	ENSSSCG00000014873	Uncharacterized protein [Source:UniProtKB/TrEMBL;Acc:F1SUK8]	gene	overlapping	0	3.92225	3.15898	3.19592
ACHE	3	8159350	8163719	-	NaN	ACHE	ENSSSCG00000030303	acetylcholinesterase [Source:HGNC Symbol;Acc:108]	gene	overlapping	0	-2.99805	-1.72323	-2.49573
ACIN1	7	81287006	81325218	+	NaN	ACIN1	ENSSSCG00000002034	Uncharacterized protein [Source:UniProtKB/TrEMBL;Acc:F1S9D1]	gene	overlapping	0	5.61359	5.35055	5.52869
ACM1_PIG	2	8210976	8225289	-	NaN	CHRM1	ENSSSCG00000024545	Muscarinic acetylcholine receptor M1 [Source:UniProtKB/Swiss-Prot;Acc:P04761]	gene	overlapping	0	-2.99805	-2.30222	-2.64773
ACMSD	15	19522117	19538477	+	NaN	ACMSD	ENSSSCG00000015699	2-amino-3-carboxymuconate-6-semialdehyde decarboxylase [Source:UniProtKB/TrEMBL;Acc:F1S0C2]	gene	overlapping	0	-2.99805	-2.30222	-2.64773
ACN9	9	84323979	84325850	+	NaN	ACN9	ENSSSCG00000023850	ACN9 homolog (S. cerevisiae) [Source:HGNC Symbol;Acc:21752]	gene	overlapping	0	-2.61405	-1.20089	-0.526765
ACO1	10	38194852	38240593	-	NaN	ACO1	ENSSSCG00000023807	aconitase 1, soluble [Source:HGNC Symbol;Acc:117]	gene	overlapping	0	5.94482	5.12045	4.18821
ACOD_PIG	14	120964210	120980992	+	NaN	SCD	ENSSSCG00000010554	Acyl-CoA desaturase [Source:UniProtKB/Swiss-Prot;Acc:O02858]	gene	overlapping	0	9.75376	9.20746	8.20497
ACON_PIG	5	4384587	4412842	-	NaN	POLR3H	ENSSSCG00000000063	Uncharacterized protein [Source:UniProtKB/TrEMBL;Acc:F1SRD6]	gene	overlapping	0	6.36359	5.91404	6.17552
ACOT11	2	91785978	91788249	-	NaN	ACOT11	ENSSSCG00000023566	acyl-CoA thioesterase 11 [Source:HGNC Symbol;Acc:18156]	gene	overlapping	0	-2.99805	-2.30222	-2.64773
ACOT12	2	91722721	91726111	+	NaN	ACOT12	ENSSSCG00000014130	acyl-CoA thioesterase 12 [Source:HGNC Symbol;Acc:24436]	gene	overlapping	0	-2.99805	-2.30222	-0.561665
ACOT13	7	20657200	20658607	+	NaN	ACOT13	ENSSSCG00000001093	Uncharacterized protein [Source:UniProtKB/TrEMBL;Acc:F1RUE0]	gene	overlapping	0	1.96323	1.93558	3.54105
ACOT4	7	102786805	102791429	-	NaN	ACOT4	ENSSSCG00000002349	Uncharacterized protein [Source:UniProtKB/TrEMBL;Acc:F1S3I9]	gene	overlapping	0	4.24857	4.01676	3.18149
ACOT6	7	102742330	102748593	-	NaN	ACOT6	ENSSSCG00000002348	Uncharacterized protein [Source:UniProtKB/TrEMBL;Acc:F1S3J0]	gene	overlapping	0	0.907651	1.67956	0.909044
ACOT7	6	62103735	62176078	-	NaN	ACOT7	ENSSSCG00000003377	Uncharacterized protein [Source:UniProtKB/TrEMBL;Acc:F1RIK3]	gene	overlapping	0	4.46706	4.86929	2.10886
ACOT8	17	53685696	53700377	-	NaN	SNX21	ENSSSCG00000007425	Uncharacterized protein [Source:UniProtKB/TrEMBL;Acc:F1SC77]	gene	overlapping	0	-0.0572733	0.913877	0.686569
ACOT9	X	21205274	21232216	-	NaN	ACOT9	ENSSSCG00000012172	Uncharacterized protein [Source:UniProtKB/TrEMBL;Acc:F1SQ00]	gene	overlapping	0	3.47207	3.31949	3.47057
ACOX2	13	44232258	44264980	-	NaN	ACOX2	ENSSSCG00000011477	Acyl-coenzyme A oxidase [Source:UniProtKB/TrEMBL;Acc:F1SGH9]	gene	overlapping	0	-1.7139	-1.47758	-1.01808
ACOX3	8	4391407	4418761	+	NaN	ACOX3	ENSSSCG00000008724	Uncharacterized protein [Source:UniProtKB/TrEMBL;Acc:F1S7X9]	gene	overlapping	0	0.62657	-1.48355	0.560913
ACP2	2	16557583	16566096	+	NaN	ACP2	ENSSSCG00000013242	Uncharacterized protein [Source:UniProtKB/TrEMBL;Acc:F1SIC2]	gene	overlapping	0	2.50999	0.814719	0.976889
ACP6	4	109763760	109781621	+	NaN	ACP6	ENSSSCG00000006697	Uncharacterized protein [Source:UniProtKB/TrEMBL;Acc:F1SDC2]	gene	overlapping	0	3.51722	1.82137	-0.748958
ACPH_PIG	13	35385003	35393760	+	NaN	APEH	ENSSSCG00000011385	Acylamino-acid-releasing enzyme [Source:UniProtKB/Swiss-Prot;Acc:P19205]	gene	overlapping	0	3.47767	3.9154	2.3893
ACPL2	13	89869621	89886117	+	NaN	ACPL2	ENSSSCG00000011670	Uncharacterized protein [Source:UniProtKB/TrEMBL;Acc:F1SL47]	gene	overlapping	0	0.279689	1.91572	2.8955
ACPP	13	81003246	81016496	-	NaN	ACPP	ENSSSCG00000011627	Tyrosine acid phosphatase [Source:UniProtKB/TrEMBL;Acc:C6KEM5]	gene	overlapping	0	-2.99805	-2.30222	-2.64773
ACPT	6	51436400	51441327	+	NaN	ACPT	ENSSSCG00000024736	acid phosphatase, testicular [Source:HGNC Symbol;Acc:14376]	gene	overlapping	0	-0.019454	-0.898591	-0.772421
ACRBP_PIG	5	66530424	66541004	-	NaN	C12ORF53	ENSSSCG00000000692	Uncharacterized protein [Source:UniProtKB/TrEMBL;Acc:F1SLT0]	gene	overlapping	0	-2.99805	-1.67257	-2.64773
ACRC	X	65027096	65030020	+	NaN	ACRC	ENSSSCG00000012401	Uncharacterized protein [Source:UniProtKB/TrEMBL;Acc:F1RSV4]	gene	overlapping	0	-2.99805	-2.30222	-1.82309
ACSBG1	7	53297589	53314172	+	NaN	ACSBG1	ENSSSCG00000001760	Uncharacterized protein [Source:UniProtKB/TrEMBL;Acc:F1RKU1]	gene	overlapping	0	5.17066	5.55604	6.20054
ACSBG2	2	73444071	73475076	-	NaN	ACSBG2	ENSSSCG00000013536	Uncharacterized protein [Source:UniProtKB/TrEMBL;Acc:F1SBT8]	gene	overlapping	0	-2.99805	-2.30222	-2.64773
ACSF2	12	26802625	26841148	+	NaN	ACSF2	ENSSSCG00000017566	Uncharacterized protein [Source:UniProtKB/TrEMBL;Acc:F1RT96]	gene	overlapping	0	-2.61405	-0.352781	-2.26373
ACSF3	6	825971	843709	+	NaN	ACSF3	ENSSSCG00000023866	acyl-CoA synthetase family member 3 [Source:HGNC Symbol;Acc:27288]	gene	overlapping	0	-2.99805	-2.30222	-2.64773
ACSL5	14	134049152	134096543	-	NaN	ACSL5	ENSSSCG00000029075	Uncharacterized protein [Source:UniProtKB/TrEMBL;Acc:F1S5J8]	gene	overlapping	0	-2.99805	-1.58489	-2.64773
ACSL6	2	139569016	139615029	-	NaN	ACSL6	ENSSSCG00000014272	Uncharacterized protein [Source:UniProtKB/TrEMBL;Acc:F1RJV7]	gene	overlapping	0	7.71015	7.20517	7.51957
ACSM3	3	26031777	26061643	-	NaN	ACSM3	ENSSSCG00000007857	Uncharacterized protein [Source:UniProtKB/TrEMBL;Acc:F1RPB1]	gene	overlapping	0	2.28472	0.61158	1.24721
ACSM5	3	26172262	26260371	-	NaN	ACSM5	ENSSSCG00000026453	acyl-CoA synthetase medium-chain family member 5 [Source:HGNC Symbol;Acc:26060]	gene	overlapping	0	0.6747	-0.288566	1.64984
ACSS1	17	34950891	34988723	-	NaN	ACSS1	ENSSSCG00000007133	acyl-CoA synthetase short-chain family member 1 [Source:HGNC Symbol;Acc:16091]	gene	overlapping	0	-2.99805	-2.30222	-2.64773
ACSS3	5	105196506	105368281	-	NaN	ACSS3	ENSSSCG00000000939	Uncharacterized protein [Source:UniProtKB/TrEMBL;Acc:F1RYM4]	gene	overlapping	0	-1.45607	-0.709578	-2.5464
ACTB_PIG	3	4729276	4732654	-	NaN	BETA-ACTIN	ENSSSCG00000007585	Actin, cytoplasmic 1 Actin, cytoplasmic 1, N-terminally processed [Source:UniProtKB/Swiss-Prot;Acc:Q6QAQ1]	gene	overlapping	0	11.1808	10.9537	11.256
ACTG2	3	72251856	72310387	-	NaN	ACTG2	ENSSSCG00000008294	actin, gamma 2, smooth muscle, enteric [Source:HGNC Symbol;Acc:145]	gene	overlapping	0	-2.94738	-2.30222	-2.64773
ACTHR_PIG	6	89575890	89602023	+	NaN	MC2R	ENSSSCG00000027908	Adrenocorticotropic hormone receptor [Source:UniProtKB/Swiss-Prot;Acc:Q8HYN8]	gene	overlapping	0	-2.99805	-2.30222	-2.64773
ACTL6A	13	126700983	126722509	+	NaN	ACTL6A	ENSSSCG00000011762	Uncharacterized protein [Source:UniProtKB/TrEMBL;Acc:F1SGC8]	gene	overlapping	0	4.17434	4.466	5.19785
ACTL6B	3	7949444	7963656	-	NaN	ACTL6B	ENSSSCG00000007670	actin-like 6B [Source:HGNC Symbol;Acc:160]	gene	overlapping	0	-2.99805	-2.30222	-2.64773
ACTL7A	1	280413751	280415070	+	NaN	ACTL7A	ENSSSCG00000005439	Uncharacterized protein [Source:UniProtKB/TrEMBL;Acc:F1SP29]	gene	overlapping	0	-2.99805	-2.30222	-2.64773
ACTL7B	1	280407367	280408620	-	NaN	ACTL7B	ENSSSCG00000005438	Uncharacterized protein [Source:UniProtKB/TrEMBL;Acc:F1SP30]	gene	overlapping	0	-2.99805	-2.30222	-2.64773
ACTL8	6	70708597	70711489	+	NaN	ACTL8	ENSSSCG00000024062	actin-like 8 [Source:HGNC Symbol;Acc:24018]	gene	overlapping	0	-2.99805	-2.30222	-2.64773
ACTL9	2	71026311	71027561	-	NaN	ACTL9	ENSSSCG00000013605	Uncharacterized protein [Source:UniProtKB/TrEMBL;Acc:F1SA46]	gene	overlapping	0	-2.99805	-2.30222	-2.64773
ACTN1	7	98861961	98874027	-	NaN	ACTN1	ENSSSCG00000020703	Alpha-actinin 1 [Source:UniProtKB/TrEMBL;Acc:Q5MCI9]	gene	overlapping	0	6.76024	6.55483	6.82278
ACTN4	6	43045535	43125072	+	NaN	ACTN4	ENSSSCG00000002965	Uncharacterized protein [Source:UniProtKB/TrEMBL;Acc:F1RI39]	gene	overlapping	0	6.22157	5.80062	5.30507
ACTR10	2	39768570	39769308	-	NaN	ACTR10	ENSSSCG00000024039	actin-related protein 10 homolog (S. cerevisiae) [Source:HGNC Symbol;Acc:17372]	gene	overlapping	0	-2.99805	-2.30222	-2.64773
ACTR1A	14	123335445	123354097	-	NaN	ACTR1A	ENSSSCG00000010585	ARP1 actin-related protein 1 homolog A, centractin alpha (yeast) [Source:HGNC Symbol;Acc:167]	gene	overlapping	0	4.51569	4.90071	4.70961
ACTR1B	3	59388397	59395870	-	NaN	ACTR1B	ENSSSCG00000008194	Uncharacterized protein [Source:UniProtKB/TrEMBL;Acc:F1STD5]	gene	overlapping	0	1.82576	1.69357	0.959712
ACTR5	17	47193722	47213176	+	NaN	ACTR5	ENSSSCG00000007349	Uncharacterized protein [Source:UniProtKB/TrEMBL;Acc:F1SDX1]	gene	overlapping	0	-2.99805	-1.86755	-2.5464
ACTR6	5	87969809	87977076	-	NaN	ACTR6	ENSSSCG00000000879	Uncharacterized protein [Source:UniProtKB/TrEMBL;Acc:F1SQU0]	gene	overlapping	0	-2.99805	-2.30222	-2.64773
ACTR6	5	88009721	88114415	-	NaN	UHRF1BP1L	ENSSSCG00000026697	UHRF1 binding protein 1-like [Source:HGNC Symbol;Acc:29102]	gene	overlapping	0	2.78997	0.562963	2.23465
ACTR8	13	39034754	39057851	-	NaN	ACTR8	ENSSSCG00000011458	Uncharacterized protein [Source:UniProtKB/TrEMBL;Acc:F1SH80]	gene	overlapping	0	2.56805	3.13056	2.34948
ACTRT1	X	120283770	120284903	-	NaN	ACTRT1	ENSSSCG00000012648	Uncharacterized protein [Source:UniProtKB/TrEMBL;Acc:F1RTJ0]	gene	overlapping	0	-2.99805	-2.30222	-2.64773
ACTRT2	6	59253911	59255044	+	NaN	ACTRT2	ENSSSCG00000003357	Uncharacterized protein [Source:UniProtKB/TrEMBL;Acc:F1RJB0]	gene	overlapping	0	-2.99805	-2.30222	-2.64773
ACTS_PIG	14	65236451	65239189	+	NaN	ACTA1	ENSSSCG00000010190	Actin, alpha skeletal muscle [Source:UniProtKB/Swiss-Prot;Acc:P68137]	gene	overlapping	0	2.95999	-0.273768	-1.87973
ACVR1	15	71682577	71745410	-	NaN	ACVR1	ENSSSCG00000015874	Activin type I receptor; Uncharacterized protein [Source:UniProtKB/TrEMBL;Acc:E9M2M1]	gene	overlapping	0	-1.89671	0.322397	-0.0599196
ACVR1C	15	71386273	71422517	-	NaN	ACVR1C	ENSSSCG00000015873	Uncharacterized protein [Source:UniProtKB/TrEMBL;Acc:F1RPT9]	gene	overlapping	0	-2.99805	-2.30222	-2.64773
ACVRL1	5	17860567	17871426	+	NaN	ACVRL1	ENSSSCG00000000232	Uncharacterized protein [Source:UniProtKB/TrEMBL;Acc:F1SGK0]	gene	overlapping	0	-2.99805	-2.30222	-2.64773
ACY1_PIG	13	37310853	37315586	+	NaN	ACY1	ENSSSCG00000023325	Aminoacylase-1 [Source:UniProtKB/Swiss-Prot;Acc:P37111]	gene	overlapping	0	0.492424	2.51984	0.196543
ACY2_PIG	12	51468686	51493212	+	NaN	ASPA	ENSSSCG00000017861	Aspartoacylase [Source:UniProtKB/Swiss-Prot;Acc:B1PK17]	gene	overlapping	0	2.16601	2.80605	2.50239
ACYP1_PIG	7	104093822	104109273	-	NaN	ACYP1	ENSSSCG00000002379	Acylphosphatase-1 [Source:UniProtKB/Swiss-Prot;Acc:P24540]	gene	overlapping	0	2.6198	0.957089	0.949401
ACYP2_PIG	3	91877091	91892620	-	NaN	ACYP2	ENSSSCG00000026100	Acylphosphatase-2 [Source:UniProtKB/Swiss-Prot;Acc:P00819]	gene	overlapping	0	-2.99805	-2.30222	-2.64773
ADA	17	52502092	52520582	-	NaN	ADA	ENSSSCG00000021255	adenosine deaminase [Source:HGNC Symbol;Acc:186]	gene	overlapping	0	1.34137	-1.86755	-2.64773
ADA10_PIG	1	125473597	125527323	-	NaN	ADAM10	ENSSSCG00000004595	Disintegrin and metalloproteinase domain-containing protein 10 [Source:UniProtKB/Swiss-Prot;Acc:O77633]	gene	overlapping	0	7.01962	7.08807	7.14219
ADA17_PIG	3	135176525	135222600	-	NaN	ITGB1BP1	ENSSSCG00000029313	integrin beta 1 binding protein 1 [Source:HGNC Symbol;Acc:23927]	gene	overlapping	0	3.19436	1.94952	2.57979
ADA1D_PIG	17	35851523	35872814	+	NaN	ADRA1D	ENSSSCG00000007139	Alpha-1D adrenergic receptor [Source:UniProtKB/Swiss-Prot;Acc:Q9TTM9]	gene	overlapping	0	-2.0116	-2.30222	-2.06874
ADA2A_PIG	14	132403894	132405246	+	NaN	ADRA2A	ENSSSCG00000010629	Alpha-2A adrenergic receptor [Source:UniProtKB/Swiss-Prot;Acc:P18871]	gene	overlapping	0	-2.99805	-2.30222	-2.64773
ADAD1	8	108829983	108871758	-	NaN	ADAD1	ENSSSCG00000009089	Uncharacterized protein [Source:UniProtKB/TrEMBL;Acc:F1RQN0]	gene	overlapping	0	0.0821641	-0.0935787	-0.0654155
ADAL	1	142954883	142982556	-	NaN	ADAL	ENSSSCG00000004710	Uncharacterized protein [Source:UniProtKB/TrEMBL;Acc:F1SI59]	gene	overlapping	0	0.0832534	1.40073	2.82558
ADAM10	1	125355481	125379412	+	NaN	ADAM10	ENSSSCG00000004594	ADAM metallopeptidase domain 10 [Source:HGNC Symbol;Acc:188]	gene	overlapping	0	2.68934	2.64453	2.15953
ADAM11	12	18813060	18888884	-	NaN	ADAM11	ENSSSCG00000017349	Uncharacterized protein [Source:UniProtKB/TrEMBL;Acc:F1RQZ7]	gene	overlapping	0	-1.67826	-2.30222	-2.64773
ADAM12	14	146937523	147045431	-	NaN	ADAM12	ENSSSCG00000010746	Uncharacterized protein [Source:UniProtKB/TrEMBL;Acc:F1SDM3]	gene	overlapping	0	-2.99805	-2.30222	-2.64773
ADAM15	4	103518217	103529707	-	NaN	ADAM15	ENSSSCG00000006533	Uncharacterized protein [Source:UniProtKB/TrEMBL;Acc:F1RGQ1]	gene	overlapping	0	-1.79424	-2.30222	-2.59706
ADAM18	17	10953502	10995642	-	NaN	ADAM18	ENSSSCG00000007008	Uncharacterized protein [Source:UniProtKB/TrEMBL;Acc:F1SE43]	gene	overlapping	0	-2.99805	-2.30222	-2.64773
ADAM19	16	71570441	71669557	+	NaN	ADAM19	ENSSSCG00000017052	Uncharacterized protein [Source:UniProtKB/TrEMBL;Acc:F1RQF1]	gene	overlapping	0	7.34088	7.40954	2.86454
ADAM21	7	100390460	100392316	+	NaN	ADAM21	ENSSSCG00000002322	Uncharacterized protein [Source:UniProtKB/TrEMBL;Acc:F1S4A2]	gene	overlapping	0	-2.99805	-2.30222	-2.64773
ADAM22	9	74844064	74905640	+	NaN	ADAM22	ENSSSCG00000015297	Uncharacterized protein [Source:UniProtKB/TrEMBL;Acc:F1S341]	gene	overlapping	0	-2.99805	-2.30222	-2.64773
ADAM23	15	121306038	121474753	+	NaN	ADAM23	ENSSSCG00000016131	Uncharacterized protein [Source:UniProtKB/TrEMBL;Acc:F1SHD2]	gene	overlapping	0	-2.99805	-2.25156	-2.21306
ADAM28	14	9426169	9481493	+	NaN	ADAM28	ENSSSCG00000009644	Uncharacterized protein [Source:UniProtKB/TrEMBL;Acc:F1RM87]	gene	overlapping	0	-2.99805	-2.30222	-2.64773
ADAM29	14	16572910	16575093	-	NaN	ADAM29	ENSSSCG00000009697	Uncharacterized protein [Source:UniProtKB/TrEMBL;Acc:F1RJ17]	gene	overlapping	0	0.892059	0.754528	0.112697
ADAM30	4	111216207	111218381	+	NaN	ADAM30	ENSSSCG00000006713	Uncharacterized protein [Source:UniProtKB/TrEMBL;Acc:F1SB05]	gene	overlapping	0	-2.99805	-2.30222	-2.64773
ADAM32	15	54483937	54582749	-	NaN	ADAM32	ENSSSCG00000015807	ADAM metallopeptidase domain 32 [Source:HGNC Symbol;Acc:15479]	gene	overlapping	0	-1.70173	-0.51459	-2.64773
ADAM33	17	36350319	36365013	+	NaN	ADAM33	ENSSSCG00000007145	ADAM metallopeptidase domain 33 [Source:HGNC Symbol;Acc:15478]	gene	overlapping	0	-2.28072	-1.86755	-2.5464
ADAM5	15	54295213	54442401	-	NaN	ADAM5	ENSSSCG00000015806	Disintegrin and metalloprotease domain-containing protein 5 [Source:UniProtKB/TrEMBL;Acc:E7FM66]	gene	overlapping	0	-1.12274	-0.810913	-2.59706
ADAM7	14	9524266	9564974	+	NaN	ADAM7	ENSSSCG00000009646	ADAM metallopeptidase domain 7 [Source:HGNC Symbol;Acc:214]	gene	overlapping	0	-2.99805	-2.30222	-2.64773
ADAM8	14	153183591	153194208	-	NaN	ADAM8	ENSSSCG00000010772	Uncharacterized protein [Source:UniProtKB/TrEMBL;Acc:F1SCV2]	gene	overlapping	0	4.32186	3.61832	2.73775
ADAM-9	15	54597519	54674520	-	NaN	ADAM-9	ENSSSCG00000015808	Uncharacterized protein [Source:UniProtKB/TrEMBL;Acc:F1RZL4]	gene	overlapping	0	6.45971	6.83113	4.81196
ADAMDEC1	14	9497814	9512872	+	NaN	ADAMDEC1	ENSSSCG00000009645	Uncharacterized protein [Source:UniProtKB/TrEMBL;Acc:F1RM86]	gene	overlapping	0	-2.99805	-2.30222	-2.64773
ADAMTS10	2	71100635	71119498	+	NaN	ADAMTS10	ENSSSCG00000026994	ADAM metallopeptidase [Source:UniProtKB/TrEMBL;Acc:F8UV45]	gene	overlapping	0	-0.927752	-1.72323	-1.68474
ADAMTS12	16	20237302	20549746	-	NaN	ADAMTS12	ENSSSCG00000016816	ADAM metallopeptidase with thrombospondin type 1 motif, 12 [Source:HGNC Symbol;Acc:14605]	gene	overlapping	0	-2.56338	-1.86755	-2.64773
ADAMTS13	1	306998075	307029937	+	NaN	ADAMTS13	ENSSSCG00000021241	ADAM metallopeptidase with thrombospondin type 1 motif, 13 [Source:HGNC Symbol;Acc:1366]	gene	overlapping	0	-2.28072	-2.30222	-2.59706
ADAMTS14	14	79413375	79501706	+	NaN	ADAMTS14	ENSSSCG00000010272	Uncharacterized protein [Source:UniProtKB/TrEMBL;Acc:F1SUB5]	gene	overlapping	0	-2.99805	-2.30222	-2.64773
ADAMTS15	9	63398130	63422854	+	NaN	ADAMTS15	ENSSSCG00000015250	ADAM metallopeptidase with thrombospondin type 1 motif, 15 [Source:HGNC Symbol;Acc:16305]	gene	overlapping	0	-2.99805	-0.736782	-1.43909
ADAMTS16	16	82630444	82792519	-	NaN	ADAMTS16	ENSSSCG00000017109	Uncharacterized protein [Source:UniProtKB/TrEMBL;Acc:F1S046]	gene	overlapping	0	-2.99805	-2.30222	-2.64773
ADAMTS19	2	137455203	137519461	+	NaN	ADAMTS19	ENSSSCG00000014259	Uncharacterized protein [Source:UniProtKB/TrEMBL;Acc:F1RKJ8]	gene	overlapping	0	-2.99805	-2.30222	-2.64773
ADAMTS2	2	80749844	81010536	+	NaN	ADAMTS2	ENSSSCG00000024043	Uncharacterized protein [Source:UniProtKB/TrEMBL;Acc:F1S427]	gene	overlapping	0	-1.19807	-2.30222	-2.59706
ADAMTS20	5	77324374	77484603	-	NaN	ADAMTS20	ENSSSCG00000000795	ADAM metallopeptidase with thrombospondin type 1 motif, 20 [Source:HGNC Symbol;Acc:17178]	gene	overlapping	0	-2.28072	-2.30222	-2.64773
ADAMTS4	4	97117569	97125927	+	NaN	ADAMTS4	ENSSSCG00000006359	Uncharacterized protein [Source:UniProtKB/TrEMBL;Acc:F1S1A7]	gene	overlapping	0	-2.99805	-1.25156	-2.64773
ADAMTS5	13	200405037	200449758	-	NaN	ADAMTS5	ENSSSCG00000012027	ADAM metallopeptidase with thrombospondin type 1 motif, 5 [Source:HGNC Symbol;Acc:221]	gene	overlapping	0	-2.99805	-2.30222	-2.64773
ADAMTS6	16	46990247	47281159	-	NaN	ADAMTS6	ENSSSCG00000016943	Uncharacterized protein [Source:UniProtKB/TrEMBL;Acc:F1SKU0]	gene	overlapping	0	-1.54375	0.559541	-2.26373
ADAMTS7	7	53451724	53469404	+	NaN	ENSSSCG00000022711	ENSSSCG00000022711	No description	gene	overlapping	0	-1.94738	-1.91822	-2.5464
ADAMTS8	9	63361521	63380850	-	NaN	ADAMTS8	ENSSSCG00000015249	Uncharacterized protein [Source:UniProtKB/TrEMBL;Acc:F1S6D3]	gene	overlapping	0	1.00994	-1.09358	-2.64773
ADAMTS9	13	50518488	50690257	-	NaN	ADAMTS9	ENSSSCG00000011496	Uncharacterized protein [Source:UniProtKB/TrEMBL;Acc:F1SFS3]	gene	overlapping	0	-1.29598	-0.760245	0.334889
ADAMTSL3	7	56500840	56671956	-	NaN	ADAMTSL3	ENSSSCG00000001793	Uncharacterized protein [Source:UniProtKB/TrEMBL;Acc:F1RIC0]	gene	overlapping	0	-2.99805	-2.30222	-2.64773
ADAMTSL3	7	56738471	56787509	+	NaN	ADAMTSL3	ENSSSCG00000001794	Uncharacterized protein [Source:UniProtKB/TrEMBL;Acc:F1RIB9]	gene	overlapping	0	-2.99805	-0.889068	-2.64773
ADAMTSL4	4	107824820	107833437	-	NaN	ADAMTSL4	ENSSSCG00000006651	Uncharacterized protein [Source:UniProtKB/TrEMBL;Acc:F1SS80]	gene	overlapping	0	-2.99805	-2.20089	-0.772421
ADAMTSL5	2	78106737	78112308	-	NaN	ADAMTSL5	ENSSSCG00000013433	Uncharacterized protein [Source:UniProtKB/TrEMBL;Acc:F1S6Q5]	gene	overlapping	0	-2.99805	-2.30222	-2.64773
ADAR	4	104004654	104023302	+	NaN	ADAR	ENSSSCG00000006543	Uncharacterized protein [Source:UniProtKB/TrEMBL;Acc:F1RGM8]	gene	overlapping	0	4.38184	3.05629	2.67196
ADARB1	13	217639809	217779076	-	NaN	ADARB1	ENSSSCG00000012089	adenosine deaminase, RNA-specific, B1 [Source:HGNC Symbol;Acc:226]	gene	overlapping	0	-2.99805	-2.30222	-2.59706
ADARB2	10	75201376	75302603	+	NaN	ADARB2	ENSSSCG00000011160	Uncharacterized protein [Source:UniProtKB/TrEMBL;Acc:F1RX47]	gene	overlapping	0	-2.99805	-2.25156	-2.06874
ADAT1	6	11917281	11943957	+	NaN	ADAT1	ENSSSCG00000002706	Uncharacterized protein [Source:UniProtKB/TrEMBL;Acc:F1S456]	gene	overlapping	0	-0.853621	-1.33923	-1.5464
ADAT2	1	24188821	24213491	+	NaN	ADAT2	ENSSSCG00000004135	Uncharacterized protein [Source:UniProtKB/TrEMBL;Acc:F1S713]	gene	overlapping	0	0.569533	-1.33923	0.700509
ADCK1	7	106833687	106901426	+	NaN	ADCK1	ENSSSCG00000002408	Uncharacterized protein [Source:UniProtKB/TrEMBL;Acc:F1SE04]	gene	overlapping	0	-1.18558	-2.25156	-2.59706
ADCK2	18	9657475	9676103	-	NaN	ADCK2	ENSSSCG00000016496	Uncharacterized protein [Source:UniProtKB/TrEMBL;Acc:F1SRP9]	gene	overlapping	0	2.56092	1.96454	1.60932
ADCK3	10	17094876	17115434	+	NaN	CDC42BPA	ENSSSCG00000010862	Uncharacterized protein [Source:UniProtKB/TrEMBL;Acc:F1S8P5]	gene	overlapping	0	0.784547	-1.09358	-0.772421
ADCK5	4	477777	499024	-	NaN	CPSF1	ENSSSCG00000005906	Uncharacterized protein [Source:UniProtKB/TrEMBL;Acc:F1RSN8]	gene	overlapping	0	3.0088	3.10577	3.77952
ADCY1	18	54895269	54978833	-	NaN	ADCY1	ENSSSCG00000016726	Uncharacterized protein [Source:UniProtKB/TrEMBL;Acc:F1ST77]	gene	overlapping	0	-2.99805	-2.30222	-2.64773
ADCY2	16	80358753	80624210	-	NaN	ADCY2	ENSSSCG00000017101	adenylate cyclase 2 (brain) [Source:HGNC Symbol;Acc:233]	gene	overlapping	0	-2.99805	-0.33041	-2.06874
ADCY3	3	121107128	121201171	+	NaN	ADCY3	ENSSSCG00000008578	Uncharacterized protein [Source:UniProtKB/TrEMBL;Acc:F1SDL2]	gene	overlapping	0	0.788078	1.12635	-0.823088
ADCY4	7	80227590	80243075	+	NaN	ADCY4	ENSSSCG00000001988	Uncharacterized protein [Source:UniProtKB/TrEMBL;Acc:F1SGQ5]	gene	overlapping	0	-2.99805	-1.3899	-0.901243
ADCY5	13	146611882	146680478	+	NaN	ADCY5	ENSSSCG00000027952	Adenylyl cyclase type V; Uncharacterized protein [Source:UniProtKB/TrEMBL;Acc:O62724]	gene	overlapping	0	-2.61405	-2.30222	-2.64773
ADCY6	5	15129052	15145294	-	NaN	ADCY6	ENSSSCG00000000175	Uncharacterized protein [Source:UniProtKB/TrEMBL;Acc:F1SPN5]	gene	overlapping	0	-2.41906	-2.30222	0.04739
ADCY9	3	39476973	39478097	-	NaN	ADCY9	ENSSSCG00000007950	Uncharacterized protein [Source:UniProtKB/TrEMBL;Acc:F1RK47]	gene	overlapping	0	-2.99805	-2.30222	-2.06874
ADD1	8	1208457	1291209	+	NaN	ADD1	ENSSSCG00000008692	adducin 1 (alpha) [Source:HGNC Symbol;Acc:243]	gene	overlapping	0	1.96833	1.65467	-1.72175
ADD2	3	75131802	75185121	+	NaN	ADD2	ENSSSCG00000020736	adducin 2 (beta) [Source:HGNC Symbol;Acc:244]	gene	overlapping	0	-2.99805	-0.600157	-2.64773
ADD3	14	131288632	131418839	+	NaN	ADD3	ENSSSCG00000010621	Uncharacterized protein [Source:UniProtKB/TrEMBL;Acc:F1S5M9]	gene	overlapping	0	2.31033	3.67403	2.92575
ADGB	1	21065219	21249084	-	NaN	ADGB	ENSSSCG00000004114	androglobin [Source:HGNC Symbol;Acc:21212]	gene	overlapping	0	-2.08573	-1.58489	-2.26373
ADH4	8	130410138	130427879	+	NaN	ADH4	ENSSSCG00000009184	Uncharacterized protein [Source:UniProtKB/TrEMBL;Acc:F1S0Y8]	gene	overlapping	0	-2.99805	-1.91822	-2.64773
ADH5	8	130451260	130466903	+	NaN	ADH5	ENSSSCG00000009185	Uncharacterized protein [Source:UniProtKB/TrEMBL;Acc:F1S0C1]	gene	overlapping	0	5.05993	4.55522	5.98415
ADH7	8	130165209	130185018	+	NaN	ADH7	ENSSSCG00000009182	Uncharacterized protein [Source:UniProtKB/TrEMBL;Acc:F1S0Z0]	gene	overlapping	0	-2.99805	-2.30222	-2.64773
ADHFE1	4	74419324	74452907	-	NaN	ADHFE1	ENSSSCG00000006213	Uncharacterized protein [Source:UniProtKB/TrEMBL;Acc:F1RTZ1]	gene	overlapping	0	-2.0116	-2.30222	-2.06874
ADIG_PIG	17	47080659	47083902	+	NaN	ADIG	ENSSSCG00000007346	Adipogenin [Source:UniProtKB/Swiss-Prot;Acc:Q30C86]	gene	overlapping	0	-2.99805	-2.30222	-2.64773
ADK	14	82962337	83441605	+	NaN	ADK	ENSSSCG00000010315	Uncharacterized protein [Source:UniProtKB/TrEMBL;Acc:F1S2G5]	gene	overlapping	0	1.15384	2.24319	1.91985
ADM5_PIG	6	50460670	50461602	+	NaN	ADM5	ENSSSCG00000003190	ADM5 Adrenomedullin-5 [Source:UniProtKB/Swiss-Prot;Acc:A5LHG2]	gene	overlapping	0	-2.99805	-1.53422	-0.277278
ADML_PIG	2	52576215	52578540	-	NaN	ADM	ENSSSCG00000013408	ADM Adrenomedullin Proadrenomedullin N-20 terminal peptide [Source:UniProtKB/Swiss-Prot;Acc:P53366]	gene	overlapping	0	3.83914	3.98933	5.18629
ADNP2	1	310004737	310041305	-	NaN	ADNP2	ENSSSCG00000005774	Uncharacterized protein [Source:UniProtKB/TrEMBL;Acc:F1RZB3]	gene	overlapping	0	3.71853	2.55057	3.97238
ADO	14	71510329	71511141	+	NaN	ADO	ENSSSCG00000010223	Uncharacterized protein [Source:UniProtKB/TrEMBL;Acc:F1RFB8]	gene	overlapping	0	-2.61405	-2.25156	-2.64773
ADORA2A	14	52914666	52931656	+	NaN	ADORA2A	ENSSSCG00000010054	Uncharacterized protein [Source:UniProtKB/TrEMBL;Acc:F1RLS0]	gene	overlapping	0	-2.94738	-0.426912	-0.183909
ADPGK	7	65276525	65285118	-	NaN	ADPGK	ENSSSCG00000001925	Uncharacterized protein [Source:UniProtKB/TrEMBL;Acc:F1SI90]	gene	overlapping	0	-1.50674	-0.816887	-2.06874
ADPRHL2	6	85528199	85534297	+	NaN	ADPRHL2	ENSSSCG00000003634	Uncharacterized protein [Source:UniProtKB/TrEMBL;Acc:F1SV59]	gene	overlapping	0	-0.789406	-0.714411	-0.977737
ADRA1B	16	69039662	69092287	-	NaN	ADRA1B	ENSSSCG00000017041	Alpha-1B adrenergic receptor [Source:UniProtKB/TrEMBL;Acc:Q70HQ0]	gene	overlapping	0	-2.99805	-2.30222	-2.64773
ADRA2C	8	2048702	2050084	+	NaN	ADRA2C	ENSSSCG00000008703	adrenergic, alpha-2C-, receptor [Source:HGNC Symbol;Acc:283]	gene	overlapping	0	-2.99805	-2.30222	-2.64773
ADRB1_PIG	14	135520692	135522044	+	NaN	ADRB1	ENSSSCG00000010647	Beta-1 adrenergic receptor [Source:UniProtKB/Swiss-Prot;Acc:Q28998]	gene	overlapping	0	-2.99805	-2.30222	-2.64773
ADRB3_PIG	15	55482168	55484072	-	NaN	ADRB3	ENSSSCG00000015821	Beta-3 adrenergic receptor [Source:UniProtKB/Swiss-Prot;Acc:Q95252]	gene	overlapping	0	-2.99805	-2.30222	-2.64773
ADRBK1	2	3992424	4000951	-	NaN	ADRBK1	ENSSSCG00000012918	Uncharacterized protein [Source:UniProtKB/TrEMBL;Acc:F1RUX3]	gene	overlapping	0	0.210594	1.30522	-0.169969
ADRBK2	14	46128674	46263886	+	NaN	ADRBK2	ENSSSCG00000009956	Uncharacterized protein [Source:UniProtKB/TrEMBL;Acc:F1RG86]	gene	overlapping	0	-0.50674	-1.72323	-0.0316232
ADSV_PIG	9	90266490	90348474	+	NaN	SCIN	ENSSSCG00000015353	Adseverin [Source:UniProtKB/Swiss-Prot;Acc:Q29297]	gene	overlapping	0	0.667974	0.473235	1.96739
ADT3_PIG	X	113743291	113746276	-	NaN	SLC25A6	ENSSSCG00000012623	ADP/ATP translocase 3 [Source:UniProtKB/Swiss-Prot;Acc:Q6QRN9]	gene	overlapping	0	4.9212	6.01942	7.59965
AEBP1	18	55940540	55950130	-	NaN	AEBP1	ENSSSCG00000016754	Uncharacterized protein [Source:UniProtKB/TrEMBL;Acc:F1SSF7]	gene	overlapping	0	-2.99805	-2.30222	-2.64773
AEBP2	5	56912805	56987034	-	NaN	AEBP2	ENSSSCG00000000587	Uncharacterized protein [Source:UniProtKB/TrEMBL;Acc:F1SQZ3]	gene	overlapping	0	5.43878	5.28441	5.77295
AEN	1	212633409	212644737	-	NaN	AEN	ENSSSCG00000005102	Uncharacterized protein [Source:UniProtKB/TrEMBL;Acc:F1SRT3]	gene	overlapping	0	5.56381	6.36274	4.85486
AFAP1	8	4098117	4126274	-	NaN	AFAP1	ENSSSCG00000023907	Uncharacterized protein [Source:UniProtKB/TrEMBL;Acc:F1S7Y7]	gene	overlapping	0	-2.94738	-1.91822	-2.64773
AFAP1L1	2	157208702	157273006	+	NaN	AFAP1L1	ENSSSCG00000014431	Uncharacterized protein [Source:UniProtKB/TrEMBL;Acc:F1RL95]	gene	overlapping	0	1.2366	-1.25156	-1.43909
AFAP1L2	14	135751397	135856772	-	NaN	AFAP1L2	ENSSSCG00000010650	actin filament associated protein 1-like 2 [Source:HGNC Symbol;Acc:25901]	gene	overlapping	0	4.17198	3.82805	2.87611
AFF1	8	141000201	141104090	+	NaN	AFF1	ENSSSCG00000009224	Uncharacterized protein [Source:UniProtKB/TrEMBL;Acc:F1RW30]	gene	overlapping	0	1.41659	0.922028	1.24561
AFF2	X	138418662	138742827	+	NaN	AFF2	ENSSSCG00000012730	AF4/FMR2 family, member 2 [Source:HGNC Symbol;Acc:3776]	gene	overlapping	0	0.353303	-1.72323	-1.48976
AFF4	2	140670244	140804239	-	NaN	AFF4	ENSSSCG00000014291	Uncharacterized protein [Source:UniProtKB/TrEMBL;Acc:F1RI16]	gene	overlapping	0	5.39787	5.5022	5.7611
AFG3L2	6	90816096	90833719	-	NaN	AFG3L2	ENSSSCG00000022947	AFG3 ATPase family gene 3-like 2 (S. cerevisiae) [Source:HGNC Symbol;Acc:315]	gene	overlapping	0	3.46248	4.14709	5.0059
AFM	8	73806956	73828345	+	NaN	AFM	ENSSSCG00000008950	Uncharacterized protein [Source:UniProtKB/TrEMBL;Acc:F1RUM1]	gene	overlapping	0	-2.99805	-2.30222	-2.64773
AFP	7	24770594	24781821	-	NaN	AFP	ENSSSCG00000001232	Novel protein similar to tripartite motif-containing protein 26 [Source:UniProtKB/TrEMBL;Acc:B6ICV2]	gene	overlapping	0	-2.99805	-2.30222	-2.64773
AFTPH	3	81192659	81231820	-	NaN	AFTPH	ENSSSCG00000008363	Uncharacterized protein [Source:UniProtKB/TrEMBL;Acc:F1SIY7]	gene	overlapping	0	5.5549	5.16172	4.97735
AGA	15	45612423	45623938	-	NaN	AGA	ENSSSCG00000015772	Glycosylasparaginase beta chain [Source:UniProtKB/TrEMBL;Acc:F1RT17]	gene	overlapping	0	4.02095	3.65096	3.94663
AGAP1	15	150152463	150427955	+	NaN	AGAP1	ENSSSCG00000016317	Uncharacterized protein [Source:UniProtKB/TrEMBL;Acc:F1SM10]	gene	overlapping	0	-0.170079	-1.37624	0.580544
AGAP3	18	6444843	6502045	-	NaN	AGAP3	ENSSSCG00000025610	ArfGAP with GTPase domain, ankyrin repeat and PH domain 3 [Source:HGNC Symbol;Acc:16923]	gene	overlapping	0	2.90665	2.00616	1.03259
AGBL2	2	16114075	16120282	+	NaN	AGBL2	ENSSSCG00000013225	Uncharacterized protein [Source:UniProtKB/TrEMBL;Acc:F1SIF6]	gene	overlapping	0	-2.99805	-1.05657	-2.64773
AGBL3	18	15001021	15069125	-	NaN	AGBL3	ENSSSCG00000016529	ATP/GTP binding protein-like 3 [Source:HGNC Symbol;Acc:27981]	gene	overlapping	0	2.29785	-0.51459	-0.0550863
AGBL5	3	119045334	119064498	-	NaN	AGBL5	ENSSSCG00000008558	Uncharacterized protein [Source:UniProtKB/TrEMBL;Acc:F1SDQ4]	gene	overlapping	0	4.07076	4.28515	4.18897
AGER	7	28038957	28042004	-	NaN	AGER	ENSSSCG00000001437	advanced glycosylation end product-specific receptor [Source:RefSeq peptide;Acc:NP_001116690]	gene	overlapping	0	-2.99805	-2.30222	-2.64773
AGFG1	15	142743868	142774381	-	NaN	AGFG1	ENSSSCG00000016248	ArfGAP with FG repeats 1 [Source:HGNC Symbol;Acc:5175]	gene	overlapping	0	4.98429	5.47881	5.049
AGFG2	3	7811252	7833017	+	NaN	AGFG2	ENSSSCG00000007664	Uncharacterized protein [Source:UniProtKB/TrEMBL;Acc:F1RMY4]	gene	overlapping	0	-1.41906	-2.25156	-1.68474
AGGF1	2	87506804	87552657	+	NaN	AGGF1	ENSSSCG00000014094	Uncharacterized protein [Source:UniProtKB/TrEMBL;Acc:F1S2H1]	gene	overlapping	0	4.25727	4.83821	4.6214
AGK	18	8555431	8689368	-	NaN	AGK	ENSSSCG00000016492	Uncharacterized protein [Source:UniProtKB/TrEMBL;Acc:F1SRQ3]	gene	overlapping	0	2.80363	-0.107126	2.50941
AGL	4	129761870	129832535	-	NaN	AGL	ENSSSCG00000006872	Uncharacterized protein [Source:UniProtKB/TrEMBL;Acc:F1S557]	gene	overlapping	0	2.48676	2.55447	2.68635
AGMAT	6	69201683	69211340	+	NaN	AGMAT	ENSSSCG00000003463	Uncharacterized protein [Source:UniProtKB/TrEMBL;Acc:F1SUU6]	gene	overlapping	0	-2.99805	-2.30222	-2.64773
AGMO	9	93226924	93307655	-	NaN	AGMO	ENSSSCG00000015356	Uncharacterized protein [Source:UniProtKB/TrEMBL;Acc:F1SF60]	gene	overlapping	0	-2.99805	-2.30222	-2.64773
AGPAT6	17	12137573	12156837	+	NaN	AGPAT6	ENSSSCG00000007019	glycerol-3-phosphate acyltransferase 6 [Source:RefSeq peptide;Acc:NP_001138491]	gene	overlapping	0	0.733373	1.82472	1.92707
AGPAT9	8	144210507	144273732	-	NaN	AGPAT9	ENSSSCG00000009233	Uncharacterized protein [Source:UniProtKB/TrEMBL;Acc:F1RW11]	gene	overlapping	0	3.25045	3.35304	2.67122
AGPS	15	92609003	92831152	+	NaN	AGPS	ENSSSCG00000023983	alkylglycerone phosphate synthase [Source:HGNC Symbol;Acc:327]	gene	overlapping	0	4.29183	4.63193	5.28491
AGR2	9	94843483	94855042	+	NaN	AGR2	ENSSSCG00000015363	Uncharacterized protein [Source:UniProtKB/TrEMBL;Acc:F1SEI7]	gene	overlapping	0	-2.94738	-1.91822	-2.26373
AGR3	9	94927998	94938933	-	NaN	AGR3	ENSSSCG00000029650	anterior gradient 3 homolog (Xenopus laevis) [Source:HGNC Symbol;Acc:24167]	gene	overlapping	0	-2.99805	-2.30222	-2.64773
AGRP_PIG	6	25399704	25400751	-	NaN	AGRP	ENSSSCG00000002775	Agouti-related protein [Source:UniProtKB/Swiss-Prot;Acc:Q9TU18]	gene	overlapping	0	-2.99805	-2.30222	-2.64773
AGT	14	64380784	64389549	-	NaN	AGT	ENSSSCG00000010184	Uncharacterized protein [Source:UniProtKB/TrEMBL;Acc:F1RG45]	gene	overlapping	0	-2.99805	-2.25156	-2.64773
AGTPBP1	10	33554265	33666696	+	NaN	AGTPBP1	ENSSSCG00000010957	Uncharacterized protein [Source:UniProtKB/TrEMBL;Acc:F1S4H9]	gene	overlapping	0	3.31467	2.67134	1.55903
AGTR1_PIG	13	96976483	96977562	+	NaN	AGTR1	ENSSSCG00000011695	Type-1 angiotensin II receptor [Source:UniProtKB/Swiss-Prot;Acc:P30555]	gene	overlapping	0	-2.99805	-1.91822	-2.64773
AGTR2	X	109824121	109825209	-	NaN	AGTR2	ENSSSCG00000012600	Uncharacterized protein [Source:UniProtKB/TrEMBL;Acc:F1RWT0]	gene	overlapping	0	-2.99805	-2.30222	-2.64773
AGTRAP	6	65703149	65714899	-	NaN	AGTRAP	ENSSSCG00000022401	Uncharacterized protein [Source:UniProtKB/TrEMBL;Acc:F1RF88]	gene	overlapping	0	2.67327	3.3305	2.38447
AGXT	15	157617111	157627583	+	NaN	AGXT	ENSSSCG00000016402	Uncharacterized protein [Source:UniProtKB/TrEMBL;Acc:F1SHW5]	gene	overlapping	0	-2.99805	-2.30222	-2.64773
AGXT2	16	21478635	21519015	-	NaN	AGXT2	ENSSSCG00000016829	Uncharacterized protein [Source:UniProtKB/TrEMBL;Acc:F1SND2]	gene	overlapping	0	-2.94738	-1.47758	-2.64773
AGXT2L1	8	121603073	121621976	+	NaN	AGXT2L1	ENSSSCG00000009144	Uncharacterized protein [Source:UniProtKB/TrEMBL;Acc:F1S126]	gene	overlapping	0	0.0412119	2.33949	4.43953
AGXT2L2	2	81754512	81803544	+	NaN	AGXT2L2	ENSSSCG00000014030	Uncharacterized protein [Source:UniProtKB/TrEMBL;Acc:F1S421]	gene	overlapping	0	5.95096	6.56627	7.83666
AHCTF1	10	17369650	17441349	+	NaN	AHCTF1	ENSSSCG00000010863	Uncharacterized protein [Source:UniProtKB/TrEMBL;Acc:F1S8P4]	gene	overlapping	0	6.54612	6.84733	7.32398
AHCYL2	18	20333818	20511321	-	NaN	AHCYL2	ENSSSCG00000016568	Adenosylhomocysteinase [Source:UniProtKB/TrEMBL;Acc:F1SMQ4]	gene	overlapping	0	1.26686	0.957089	-1.20709
AHDC1	6	78332771	78337582	+	NaN	FGR	ENSSSCG00000003578	Gardner-Rasheed feline sarcoma viral (v-fgr) oncogene homolog [Source:HGNC Symbol;Acc:3697]	gene	overlapping	0	-2.36839	-1.19491	-1.9304
AHI1	1	32049106	32243731	+	NaN	AHI1	ENSSSCG00000004166	Uncharacterized protein [Source:UniProtKB/TrEMBL;Acc:F1S3R7]	gene	overlapping	0	1.65432	0.726232	2.1283
AHNAK	2	8544927	8553182	+	NaN	AHNAK	ENSSSCG00000027969	AHNAK nucleoprotein [Source:HGNC Symbol;Acc:347]	gene	overlapping	0	10.0771	10.0047	9.22602
AHR	9	95509942	95542785	+	NaN	AHR	ENSSSCG00000030484	Uncharacterized protein [Source:UniProtKB/TrEMBL;Acc:F1SEI6]	gene	overlapping	0	0.195326	0.152077	0.519069
AHSA1	7	106275598	106444823	-	NaN	AHSA1	ENSSSCG00000002406	Uncharacterized protein [Source:UniProtKB/TrEMBL;Acc:F1SE06]	gene	overlapping	0	-2.99805	-2.30222	-2.5464
AHSA1	7	106756898	106765220	-	NaN	AHSA1	ENSSSCG00000029722	Uncharacterized protein [Source:UniProtKB/TrEMBL;Acc:F1SE06]	gene	overlapping	0	-2.94738	-2.30222	-2.26373
AHSA2	3	84527998	84573698	+	NaN	AHSA2	ENSSSCG00000008383	Uncharacterized protein [Source:UniProtKB/TrEMBL;Acc:F1SQM4]	gene	overlapping	0	0.184872	-0.142764	-1.06874
AICDA	5	65607546	65616194	+	NaN	AICDA	ENSSSCG00000000667	Uncharacterized protein [Source:UniProtKB/TrEMBL;Acc:F1SLW5]	gene	overlapping	0	-0.765943	0.183113	-1.5464
AIDA	10	13586602	13621298	-	NaN	AIDA	ENSSSCG00000010835	Uncharacterized protein [Source:UniProtKB/TrEMBL;Acc:F1S9H0]	gene	overlapping	0	2.90877	1.99898	2.66847
AIF1_PIG	7	27520797	27522821	-	NaN	AIF1	ENSSSCG00000001408	Allograft inflammatory factor 1 [Source:UniProtKB/Swiss-Prot;Acc:P81076]	gene	overlapping	0	5.39852	4.56617	-0.967408
AIFM1	X	122439445	122476820	-	NaN	AIFM1	ENSSSCG00000012657	Uncharacterized protein [Source:UniProtKB/TrEMBL;Acc:F1RTH3]	gene	overlapping	0	4.67662	4.98885	5.55444
AIFM2	14	78974008	78994034	-	NaN	AIFM2	ENSSSCG00000010258	apoptosis-inducing factor, mitochondrion-associated, 2 [Source:HGNC Symbol;Acc:21411]	gene	overlapping	0	1.22468	-1.09358	-1.48975
AIFM3	14	54011361	54025450	+	NaN	AIFM3	ENSSSCG00000010096	Uncharacterized protein [Source:UniProtKB/TrEMBL;Acc:F1RKX7]	gene	overlapping	0	-2.99805	-2.30222	-2.64773
AIG1	1	24300316	24415793	-	NaN	AIG1	ENSSSCG00000004136	androgen-induced 1 [Source:HGNC Symbol;Acc:21607]	gene	overlapping	0	-0.672573	-0.810913	0.730178
AIM1	1	81996299	82061659	+	NaN	AIM1	ENSSSCG00000004371	Uncharacterized protein [Source:UniProtKB/TrEMBL;Acc:F1RT49]	gene	overlapping	0	0.711428	1.51456	1.12587
AIP	2	3761548	3767520	-	NaN	AIP	ENSSSCG00000012904	Uncharacterized protein [Source:UniProtKB/TrEMBL;Acc:F1RUZ6]	gene	overlapping	0	-0.570955	-1.53422	-0.64625
AIPL1	12	52905783	52915377	+	NaN	AIPL1	ENSSSCG00000022026	aryl hydrocarbon receptor interacting protein-like 1 [Source:HGNC Symbol;Acc:359]	gene	overlapping	0	-2.94738	-2.30222	-2.64773
AIRE	13	217028235	217037990	+	NaN	AIRE	ENSSSCG00000025294	autoimmune regulator [Source:HGNC Symbol;Acc:360]	gene	overlapping	0	-2.99805	-2.30222	-2.64773
AK3	1	243072943	243098761	+	NaN	AK3	ENSSSCG00000023595	Uncharacterized protein [Source:UniProtKB/TrEMBL;Acc:F1SK45]	gene	overlapping	0	-1.96093	3.46136	-1.5464
AK5	6	125964963	126223426	-	NaN	AK5	ENSSSCG00000003773	Adenylate kinase 5 [Source:UniProtKB/TrEMBL;Acc:Q19QU2]	gene	overlapping	0	-2.99805	-2.30222	-2.64773
AK7	7	124867919	124925154	+	NaN	AK7	ENSSSCG00000002504	Uncharacterized protein [Source:UniProtKB/TrEMBL;Acc:F1SAQ8]	gene	overlapping	0	-2.99805	-2.30222	-2.64773
AK8	1	306530099	306530326	-	NaN	AK8	ENSSSCG00000005732	Uncharacterized protein [Source:UniProtKB/TrEMBL;Acc:F1S0S7]	gene	overlapping	0	-2.99805	-2.30222	-2.64773
AKAP11	11	25404591	25441137	-	NaN	AKAP11	ENSSSCG00000009430	Uncharacterized protein [Source:UniProtKB/TrEMBL;Acc:F1RJX0]	gene	overlapping	0	3.40907	4.43224	4.30435
AKAP12	1	17317257	17322146	-	NaN	AKAP12	ENSSSCG00000004091	Uncharacterized protein [Source:UniProtKB/TrEMBL;Acc:F1S7W0]	gene	overlapping	0	0.632856	1.61235	4.63557
AKAP13	7	94532329	94578520	+	NaN	AKAP13	ENSSSCG00000002259	Uncharacterized protein [Source:UniProtKB/TrEMBL;Acc:F1SCI4]	gene	overlapping	0	3.90939	3.77727	3.42018
AKAP14	X	113359532	113372938	-	NaN	NKAP	ENSSSCG00000012613	Uncharacterized protein [Source:UniProtKB/TrEMBL;Acc:F1RUA7]	gene	overlapping	0	-2.99805	-2.30222	-2.64773
AKAP17A	X	113939235	113947935	-	NaN	AKAP17A	ENSSSCG00000012627	Uncharacterized protein [Source:UniProtKB/TrEMBL;Acc:F1RU91]	gene	overlapping	0	-2.28072	-1.53422	-0.814264
AKAP4	X	48812868	48822851	-	NaN	AKAP4	ENSSSCG00000012306	Uncharacterized protein [Source:UniProtKB/TrEMBL;Acc:F1RW21]	gene	overlapping	0	-2.99805	-2.30222	-2.64773
AKAP5	7	94903221	94904504	+	NaN	AKAP5	ENSSSCG00000002268	Uncharacterized protein [Source:UniProtKB/TrEMBL;Acc:F1SA75]	gene	overlapping	0	0.999368	0.259386	1.72248
AKAP6	7	71774190	71776952	-	NaN	AKAP6	ENSSSCG00000024517	Uncharacterized protein [Source:UniProtKB/TrEMBL;Acc:F1SHG9]	gene	overlapping	0	-2.17341	-0.765079	-2.64773
AKAP8	2	61797643	61816393	+	NaN	AKAP8	ENSSSCG00000013837	Uncharacterized protein [Source:UniProtKB/TrEMBL;Acc:F1SA04]	gene	overlapping	0	5.44898	4.35598	5.15969
AKAP8L	2	61766018	61797193	+	NaN	AKAP8L	ENSSSCG00000013838	Uncharacterized protein [Source:UniProtKB/TrEMBL;Acc:F1SA03]	gene	overlapping	0	2.2228	2.26807	2.88901
AKAP9	9	78631028	78791245	+	NaN	AKAP9	ENSSSCG00000015310	Uncharacterized protein [Source:UniProtKB/TrEMBL;Acc:F1S317]	gene	overlapping	0	7.22377	6.6699	7.38597
AKCL2_PIG	10	71933255	71946385	-	NaN	AKR1E2	ENSSSCG00000026214	1,5-anhydro-D-fructose reductase [Source:UniProtKB/Swiss-Prot;Acc:P82125]	gene	overlapping	0	-2.99805	-2.30222	-2.64773
AKCL2_PIG	10	72108981	72122113	-	NaN	AKR1E2	ENSSSCG00000029699	1,5-anhydro-D-fructose reductase [Source:UniProtKB/Swiss-Prot;Acc:P82125]	gene	overlapping	0	-2.99805	-2.30222	-2.64773
AKD1	1	84973168	84985673	-	NaN	AKD1	ENSSSCG00000028519	adenylate kinase domain containing 1 [Source:HGNC Symbol;Acc:33814]	gene	overlapping	0	-2.99805	-2.30222	-2.64773
AKIP1	9	599874	606646	-	NaN	AKIP1	ENSSSCG00000014574	Uncharacterized protein [Source:UniProtKB/TrEMBL;Acc:F1RNJ8]	gene	overlapping	0	1.01655	1.56254	2.32134
AKIRIN2	1	62788624	62813184	-	NaN	AKIRIN2	ENSSSCG00000004307	Uncharacterized protein [Source:UniProtKB/TrEMBL;Acc:F1S0E7]	gene	overlapping	0	4.47884	4.05823	4.74306
AKNAD1	4	121691837	121724640	+	NaN	AKNAD1	ENSSSCG00000006842	AKNA domain containing 1 [Source:HGNC Symbol;Acc:28398]	gene	overlapping	0	-2.99805	-2.30222	-2.64773
AKR1C3	10	72091081	72106952	+	NaN	AKR1C3	ENSSSCG00000030447	aldo-keto reductase family 1 member C1 [Source:RefSeq peptide;Acc:NP_001038083]	gene	overlapping	0	-2.94738	-2.30222	-2.64773
AKR1D1	18	12091465	12134291	-	NaN	AKR1D1	ENSSSCG00000016519	Uncharacterized protein [Source:UniProtKB/TrEMBL;Acc:F1SNJ5]	gene	overlapping	0	-2.99805	-2.30222	-2.64773
AKR1E2	10	71933255	71946385	-	NaN	AKR1E2	ENSSSCG00000026214	1,5-anhydro-D-fructose reductase [Source:UniProtKB/Swiss-Prot;Acc:P82125]	gene	overlapping	0	-2.99805	-2.30222	-2.64773
AKR1E2	10	72108981	72122113	-	NaN	AKR1E2	ENSSSCG00000029699	1,5-anhydro-D-fructose reductase [Source:UniProtKB/Swiss-Prot;Acc:P82125]	gene	overlapping	0	-2.99805	-2.30222	-2.64773
AKT1S1	6	50610689	50619327	-	NaN	AKT1S1	ENSSSCG00000003194	Uncharacterized protein [Source:UniProtKB/TrEMBL;Acc:F1RHU2]	gene	overlapping	0	3.42347	2.91787	3.59445
AKT2	6	44333308	44378138	-	NaN	AKT2	ENSSSCG00000002989	Uncharacterized protein; V-akt murine thymoma viral oncogene-like 2 [Source:UniProtKB/TrEMBL;Acc:F1RHD4]	gene	overlapping	0	2.46471	3.03216	2.62856
AKT3	10	17966066	18263451	+	NaN	AKT3	ENSSSCG00000010872	V-akt murine thymoma viral oncogene-like 3 [Source:UniProtKB/TrEMBL;Acc:G9BWQ3]	gene	overlapping	0	4.13865	3.73822	4.70681
AL5AP_PIG	11	7261120	7287563	+	NaN	ALOX5AP	ENSSSCG00000009330	Arachidonate 5-lipoxygenase-activating protein [Source:UniProtKB/Swiss-Prot;Acc:P30356]	gene	overlapping	0	-2.99805	-2.30222	-2.64773
AL9A1_PIG	4	92685722	92713628	+	NaN	ALDH9A1	ENSSSCG00000006324	4-trimethylaminobutyraldehyde dehydrogenase [Source:UniProtKB/Swiss-Prot;Acc:Q29228]	gene	overlapping	0	3.66156	4.03176	2.37707
ALAS1	13	37657827	37667061	-	NaN	ALAS1	ENSSSCG00000011437	aminolevulinate, delta-, synthase 1 [Source:HGNC Symbol;Acc:396]	gene	overlapping	0	4.52524	4.59646	4.99032
ALAS2	X	53807790	53832222	-	NaN	ALAS2	ENSSSCG00000012347	Uncharacterized protein [Source:UniProtKB/TrEMBL;Acc:F1RUD4]	gene	overlapping	0	-2.61405	-1.91822	-1.32795
ALAT1_PIG	4	388744	391693	-	NaN	GPT	ENSSSCG00000005900	Alanine aminotransferase 1 [Source:UniProtKB/Swiss-Prot;Acc:P13191]	gene	overlapping	0	-2.94738	-2.25156	-2.59706
ALBU_PIG	8	73610470	73630121	-	NaN	ALB	ENSSSCG00000008948	Serum albumin [Source:UniProtKB/Swiss-Prot;Acc:P08835]	gene	overlapping	0	-2.99805	-2.30222	-2.64773
ALCAM	13	162991981	163213622	-	NaN	ALCAM	ENSSSCG00000011946	Uncharacterized protein [Source:UniProtKB/TrEMBL;Acc:F1SL34]	gene	overlapping	0	4.96457	4.04131	3.68484
ALDH16A1	6	50258234	50275377	+	NaN	PIH1D1	ENSSSCG00000003169	Uncharacterized protein [Source:UniProtKB/TrEMBL;Acc:F1RHZ8]	gene	overlapping	0	1.01904	-0.231925	0.256734
ALDH18A1	14	116807919	116855107	-	NaN	ALDH18A1	ENSSSCG00000010495	Uncharacterized protein [Source:UniProtKB/TrEMBL;Acc:F1SC47]	gene	overlapping	0	1.98055	0.818743	0.499552
ALDH1A1	1	252793170	252808540	+	NaN	ALDH1A1	ENSSSCG00000028996	aldehyde dehydrogenase 1 family, member A1 [Source:HGNC Symbol;Acc:402]	gene	overlapping	0	-2.99805	-2.30222	-2.64773
ALDH1A2	1	126092062	126105183	+	NaN	ALDH1A2	ENSSSCG00000025578	aldehyde dehydrogenase 1 family, member A2 [Source:HGNC Symbol;Acc:15472]	gene	overlapping	0	0.323217	-1.14425	-0.836636
ALDH1A3	1	155679743	155693815	+	NaN	ENSSSCG00000004823	ENSSSCG00000004823	Uncharacterized protein [Source:UniProtKB/TrEMBL;Acc:F1SR93]	gene	overlapping	0	-2.99805	-2.30222	-2.64773
ALDH1B1	1	267166211	267167764	+	NaN	ALDH1B1	ENSSSCG00000005361	aldehyde dehydrogenase 1 family, member B1 [Source:HGNC Symbol;Acc:407]	gene	overlapping	0	-2.99805	-2.30222	-2.59706
ALDH1L2	5	82894882	82958376	+	NaN	ALDH1L2	ENSSSCG00000000839	Uncharacterized protein [Source:UniProtKB/TrEMBL;Acc:F1SG42]	gene	overlapping	0	6.01201	5.37875	4.10129
ALDH2_PIG	14	42378891	42409687	-	NaN	ALDH2	ENSSSCG00000009889	Aldehyde dehydrogenase, mitochondrial [Source:UniProtKB/Swiss-Prot;Acc:Q2XQV4]	gene	overlapping	0	4.53003	4.75284	3.9277
ALDH3A1	12	62638752	62645604	-	NaN	ALDH3A1	ENSSSCG00000018044	Aldehyde dehydrogenase [Source:UniProtKB/TrEMBL;Acc:F1SDC4]	gene	overlapping	0	-2.99805	-2.30222	-2.64773
ALDH3A2	12	62591994	62605074	+	NaN	ALDH3A2	ENSSSCG00000018041	Aldehyde dehydrogenase [Source:UniProtKB/TrEMBL;Acc:F1SDC7]	gene	overlapping	0	3.0894	2.03719	0.284221
ALDH3B2	2	3563353	3568662	+	NaN	ALDH3B2	ENSSSCG00000026349	aldehyde dehydrogenase 3 family, member B2 [Source:HGNC Symbol;Acc:411]	gene	overlapping	0	1.76108	1.11132	-0.748958
ALDH4A1	6	71494050	71512649	+	NaN	ENSSSCG00000022839	ENSSSCG00000022839	No description	gene	overlapping	0	4.16446	5.61739	3.93404
ALDH6A1	7	103117991	103136318	-	NaN	ALDH6A1	ENSSSCG00000002357	Uncharacterized protein [Source:UniProtKB/TrEMBL;Acc:F1S3H1]	gene	overlapping	0	2.0302	1.20872	1.02502
ALDH7A1	2	134952715	134986910	+	NaN	ALDH7A1	ENSSSCG00000014247	Uncharacterized protein [Source:UniProtKB/TrEMBL;Acc:F1RKM1]	gene	overlapping	0	3.09934	3.20997	2.54951
ALDOB	1	271709170	271710365	+	NaN	ALDOB	ENSSSCG00000005395	Uncharacterized protein [Source:UniProtKB/TrEMBL;Acc:F1SSB4]	gene	overlapping	0	-2.99805	-2.30222	-2.64773
ALDOB	1	271726903	271735567	-	NaN	ALDOB	ENSSSCG00000005394	Fructose-bisphosphate aldolase [Source:UniProtKB/TrEMBL;Acc:F1SSB5]	gene	overlapping	0	-0.658633	-1.14425	-1.35141
ALDR_PIG	18	15596721	15615030	+	NaN	AKR1B1	ENSSSCG00000016539	Aldose reductase [Source:UniProtKB/Swiss-Prot;Acc:P80276]	gene	overlapping	0	5.20236	5.29266	4.23887
ALG11	11	16183285	16201490	-	NaN	NEK5	ENSSSCG00000009380	Uncharacterized protein [Source:UniProtKB/TrEMBL;Acc:F1RMC9]	gene	overlapping	0	2.63238	2.74949	2.53596
ALG12	5	110955259	110962336	-	NaN	ALG12	ENSSSCG00000000980	Uncharacterized protein [Source:UniProtKB/TrEMBL;Acc:F1RXR3]	gene	overlapping	0	-1.02624	-0.816887	0.163364
ALG13	X	106059484	106122895	+	NaN	ALG13	ENSSSCG00000012586	Uncharacterized protein [Source:UniProtKB/TrEMBL;Acc:F1RWU1]	gene	overlapping	0	4.06389	3.16687	4.14052
ALG14	4	134085867	134202787	+	NaN	ALG14	ENSSSCG00000006885	Uncharacterized protein [Source:UniProtKB/TrEMBL;Acc:F1S544]	gene	overlapping	0	-1.41024	2.10749	-1.43909
ALG3	13	131581813	131587978	-	NaN	ALG3	ENSSSCG00000021319	asparagine-linked glycosylation 3, alpha-1,3- mannosyltransferase homolog (S. cerevisiae) [Source:HGNC Symbol;Acc:23056]	gene	overlapping	0	4.32783	3.96915	4.09874
ALG6	6	137377946	137434247	-	NaN	ALG6	ENSSSCG00000003815	Uncharacterized protein [Source:UniProtKB/TrEMBL;Acc:F1S811]	gene	overlapping	0	2.01498	2.70511	2.15561
ALG8	9	13600884	13632629	-	NaN	ALG8	ENSSSCG00000014887	Uncharacterized protein [Source:UniProtKB/TrEMBL;Acc:F1STY3]	gene	overlapping	0	3.09773	3.54278	2.72611
ALK	3	116868927	116922913	+	NaN	ALK	ENSSSCG00000008533	Tyrosine-protein kinase receptor [Source:UniProtKB/TrEMBL;Acc:F1S3X9]	gene	overlapping	0	-2.56338	-2.30222	-2.64773
ALKBH2	14	44326211	44331769	+	NaN	ALKBH2	ENSSSCG00000026053	Uncharacterized protein [Source:UniProtKB/TrEMBL;Acc:F1RGB3]	gene	overlapping	0	0.444074	-0.760245	0.334889
ALKBH3	2	20010994	20048322	-	NaN	ALKBH3	ENSSSCG00000025731	alkB, alkylation repair homolog 3 (E. coli) [Source:HGNC Symbol;Acc:30141]	gene	overlapping	0	0.367368	0.842206	3.66673
ALKBH4	3	9588856	9597062	-	NaN	ALKBH4	ENSSSCG00000029300	Uncharacterized protein [Source:UniProtKB/TrEMBL;Acc:F1RKF4]	gene	overlapping	0	-2.99805	-2.30222	-2.64773
ALKBH4	3	9705938	9713495	+	NaN	ALKBH4	ENSSSCG00000007686	Uncharacterized protein [Source:UniProtKB/TrEMBL;Acc:F1RKF4]	gene	overlapping	0	-2.99805	-2.30222	-2.64773
ALKBH6	6	40787609	40793022	-	NaN	ALKBH6	ENSSSCG00000002910	Uncharacterized protein [Source:UniProtKB/TrEMBL;Acc:F1RLH4]	gene	overlapping	0	1.93898	1.01373	0.642147
ALKBH7	2	73212030	73217318	-	NaN	ALKBH7	ENSSSCG00000024254	Uncharacterized protein [Source:UniProtKB/TrEMBL;Acc:F1SBT3]	gene	overlapping	0	3.31697	2.02422	2.75023
ALKBH8	9	40124450	40167601	-	NaN	ALKBH8	ENSSSCG00000024628	alkB, alkylation repair homolog 8 (E. coli) [Source:HGNC Symbol;Acc:25189]	gene	overlapping	0	2.16901	2.93195	3.56226
ALLC	3	140404865	140422923	-	NaN	ALLC	ENSSSCG00000008650	Uncharacterized protein [Source:UniProtKB/TrEMBL;Acc:F1S9K2]	gene	overlapping	0	-2.99805	-2.30222	-2.64773
ALMS1	3	72452689	72556364	-	NaN	ALMS1	ENSSSCG00000021579	Alstrom syndrome 1 [Source:HGNC Symbol;Acc:428]	gene	overlapping	0	4.84489	4.57153	5.10215
ALOX12	12	54724852	54737521	-	NaN	ALOX12	ENSSSCG00000017930	Arachidonate 12-lipoxygenase, 12S-type [Source:UniProtKB/TrEMBL;Acc:F1RF49]	gene	overlapping	0	-1.27739	0.139901	-1.73541
ALOX12B	12	55768239	55778257	-	NaN	ALOX12B	ENSSSCG00000017980	Uncharacterized protein [Source:UniProtKB/TrEMBL;Acc:F1SSY8]	gene	overlapping	0	-1.61405	-2.30222	-2.59706
ALOX15B	12	55747585	55756609	+	NaN	ALOX15B	ENSSSCG00000017978	arachidonate 15-lipoxygenase, type B [Source:HGNC Symbol;Acc:434]	gene	overlapping	0	-0.0529214	-2.30222	-2.64773
ALOX5	14	98905140	98950244	-	NaN	ALOX5	ENSSSCG00000010404	arachidonate 5-lipoxygenase [Source:HGNC Symbol;Acc:435]	gene	overlapping	0	-2.08573	-2.30222	-2.64773
ALPK1	8	118152925	118185152	+	NaN	ALPK1	ENSSSCG00000009127	Uncharacterized protein [Source:UniProtKB/TrEMBL;Acc:F1S144]	gene	overlapping	0	0.0347569	-0.376244	-0.415624
ALPK2	1	179772067	179891302	+	NaN	ALPK2	ENSSSCG00000004918	Uncharacterized protein [Source:UniProtKB/TrEMBL;Acc:F1SM39]	gene	overlapping	0	-1.89074	-2.30222	-2.64773
ALS2CL	13	32830280	32901126	-	NaN	ALS2CL	ENSSSCG00000021997	ALS2 C-terminal like [Source:HGNC Symbol;Acc:20605]	gene	overlapping	0	-2.99805	-2.30222	-2.64773
ALS2CR11	15	116627556	116650776	+	NaN	ALS2CR11	ENSSSCG00000016107	Uncharacterized protein [Source:UniProtKB/TrEMBL;Acc:F1SI33]	gene	overlapping	0	-2.94738	-0.810913	-1.01808
ALS2CR12	15	116343375	116378421	-	NaN	ALS2CR12	ENSSSCG00000016105	Uncharacterized protein [Source:UniProtKB/TrEMBL;Acc:F1SI35]	gene	overlapping	0	-2.99805	-1.91822	-2.64773
ALS2CR8	15	117869022	117914168	+	NaN	ALS2CR8	ENSSSCG00000016117	Uncharacterized protein [Source:UniProtKB/TrEMBL;Acc:F1SHE7]	gene	overlapping	0	6.29735	5.03655	6.46828
ALX1	5	101498112	101518599	-	NaN	ALX1	ENSSSCG00000000933	Uncharacterized protein [Source:UniProtKB/TrEMBL;Acc:F1SPX2]	gene	overlapping	0	-2.99805	-2.30222	-2.64773
ALX3	4	120522125	120526652	+	NaN	ALX3	ENSSSCG00000006812	Uncharacterized protein [Source:UniProtKB/TrEMBL;Acc:F1S615]	gene	overlapping	0	-2.99805	-2.30222	-2.64773
AMACR	16	20765284	20782822	-	NaN	AMACR	ENSSSCG00000016822	Uncharacterized protein [Source:UniProtKB/TrEMBL;Acc:F1SP14]	gene	overlapping	0	2.59799	-1.2651	0.39508
AMBN_PIG	8	71288922	71302169	+	NaN	AMBN	ENSSSCG00000008937	Ameloblastin [Source:UniProtKB/Swiss-Prot;Acc:Q28989]	gene	overlapping	0	-2.99805	-2.30222	-2.64773
AMBP_PIG	1	285708391	285725500	-	NaN	AMBP	ENSSSCG00000005485	Protein AMBP Alpha-1-microglobulin Inter-alpha-trypsin inhibitor light chain Trypstatin [Source:UniProtKB/Swiss-Prot;Acc:P04366]	gene	overlapping	0	-2.99805	-2.30222	-2.64773
AMBRA1	2	17313888	17465140	+	NaN	AMBRA1	ENSSSCG00000013262	Uncharacterized protein [Source:UniProtKB/TrEMBL;Acc:F1SI99]	gene	overlapping	0	3.78177	3.55907	3.12163
AMC2_PIG	8	74159970	74162170	+	NaN	AMC2_PIG	ENSSSCG00000008957	Alveolar macrophage chemotactic factor 2 [Source:UniProtKB/Swiss-Prot;Acc:P22952]	gene	overlapping	0	-2.99805	-2.30222	-2.64773
AMD1	1	86399550	86423625	-	NaN	AMD1	ENSSSCG00000004392	S-adenosylmethionine decarboxylase proenzyme [Source:UniProtKB/TrEMBL;Acc:F1RT08]	gene	overlapping	0	6.7982	7.0047	7.20693
AMDHD1	5	91755365	91772307	-	NaN	AMDHD1	ENSSSCG00000000893	Uncharacterized protein [Source:UniProtKB/TrEMBL;Acc:F1SQR6]	gene	overlapping	0	-2.99805	-1.91822	-2.64773
AMDHD2	3	42707012	42716475	+	NaN	AMDHD2	ENSSSCG00000008057	Uncharacterized protein [Source:UniProtKB/TrEMBL;Acc:F1SUH7]	gene	overlapping	0	3.84482	3.77114	2.12152
AMEL	X	8669948	8676155	+	NaN	AMEL	ENSSSCG00000012113	Amelogenin [Source:UniProtKB/Swiss-Prot;Acc:P45561]	gene	overlapping	0	-2.99805	-2.30222	-2.64773
AMEL_PIG	X	8669948	8677620	+	NaN	AMEL	ENSSSCG00000012113	Amelogenin [Source:UniProtKB/Swiss-Prot;Acc:P45561]	gene	overlapping	0	-2.99805	-2.30222	-2.64773
AMFR	6	26738903	26754724	+	NaN	AMFR	ENSSSCG00000002822	Uncharacterized protein [Source:UniProtKB/TrEMBL;Acc:F1RF19]	gene	overlapping	0	1.96809	3.65928	0.0980576
AMICA1	9	50547537	50573722	-	NaN	AMICA1	ENSSSCG00000015089	Uncharacterized protein [Source:UniProtKB/TrEMBL;Acc:F1SAL1]	gene	overlapping	0	-0.170079	-0.816887	-0.836636
AMIGO1	4	121080254	121081732	+	NaN	AMIGO1	ENSSSCG00000006826	Uncharacterized protein [Source:UniProtKB/TrEMBL;Acc:F1S601]	gene	overlapping	0	-2.41906	-2.30222	-2.64773
AMIGO2	5	80651422	80652987	-	NaN	AMIGO2	ENSSSCG00000000810	Uncharacterized protein [Source:UniProtKB/TrEMBL;Acc:F1SGW7]	gene	overlapping	0	-2.99805	-2.30222	-0.187458
AMIGO3	13	35426661	35428187	-	NaN	RNF123	ENSSSCG00000011387	Uncharacterized protein [Source:UniProtKB/TrEMBL;Acc:F1SPR6]	gene	overlapping	0	-2.99805	0.347064	-1.59706
AMMECR1	X	103860295	103975625	-	NaN	AMMECR1	ENSSSCG00000012574	Uncharacterized protein [Source:UniProtKB/TrEMBL;Acc:F1RXH0]	gene	overlapping	0	6.94733	5.97022	6.38007
AMN	7	128896529	128904678	-	NaN	AMN	ENSSSCG00000002524	Uncharacterized protein [Source:UniProtKB/TrEMBL;Acc:F1SAM7]	gene	overlapping	0	-2.99805	-2.30222	-2.64773
AMOT	X	106950604	107004559	-	NaN	AMOT	ENSSSCG00000012591	Uncharacterized protein [Source:UniProtKB/TrEMBL;Acc:F1RWT7]	gene	overlapping	0	5.14454	6.01637	4.8306
AMOTL1	9	30651655	30726848	+	NaN	AMOTL1	ENSSSCG00000014960	Uncharacterized protein [Source:UniProtKB/TrEMBL;Acc:F1STJ4]	gene	overlapping	0	-2.94738	-2.30222	-2.06874
AMOTL2	13	83024710	83040145	-	NaN	AMOTL2	ENSSSCG00000011643	Uncharacterized protein [Source:UniProtKB/TrEMBL;Acc:F1SL93]	gene	overlapping	0	0.470075	1.38556	-0.393253
AMPD3	2	52379712	52419852	-	NaN	AMPD3	ENSSSCG00000022492	adenosine monophosphate deaminase 3 [Source:HGNC Symbol;Acc:470]	gene	overlapping	0	0.8422	2.39623	1.46566
AMPE_PIG	8	119969524	120061196	-	NaN	ENPEP	ENSSSCG00000009132	Glutamyl aminopeptidase [Source:UniProtKB/Swiss-Prot;Acc:Q95334]	gene	overlapping	0	-1.31773	1.66685	-2.64773
AMPL_PIG	8	12379655	12387902	-	NaN	LAP3	ENSSSCG00000023604	Cytosol aminopeptidase [Source:UniProtKB/Swiss-Prot;Acc:P28839]	gene	overlapping	0	1.45399	1.34706	0.806568
AMPN_PIG	7	60240145	60255062	-	NaN	ANPEP	ENSSSCG00000001849	Aminopeptidase N [Source:UniProtKB/Swiss-Prot;Acc:P15145]	gene	overlapping	0	-2.99805	-2.30222	-2.64773
AMTN	8	71220968	71234060	+	NaN	AMTN	ENSSSCG00000008936	Uncharacterized protein [Source:UniProtKB/TrEMBL;Acc:F1RUQ3]	gene	overlapping	0	-2.99805	-2.30222	-2.64773
AMY2B	4	126491806	126500728	-	NaN	AMY2B	ENSSSCG00000030140	Uncharacterized protein [Source:UniProtKB/TrEMBL;Acc:F1S573]	gene	overlapping	0	1.0689	-1.33923	-1.49573
AMYP_PIG	4	126279066	126287844	+	NaN	AMY2	ENSSSCG00000025216	Pancreatic alpha-amylase [Source:UniProtKB/Swiss-Prot;Acc:P00690]	gene	overlapping	0	0.738915	0.147243	0.395079
AMYP_PIG	4	126313702	126321860	+	NaN	AMY2	ENSSSCG00000023098	Pancreatic alpha-amylase [Source:UniProtKB/Swiss-Prot;Acc:P00690]	gene	overlapping	0	-1.56338	-2.25156	-2.1624
ANAPC1	3	46249443	46327532	+	NaN	ENSSSCG00000008103	ENSSSCG00000008103	No description	gene	overlapping	0	5.70537	6.14811	5.75829
ANAPC5	14	33121467	33169482	+	NaN	ANAPC5	ENSSSCG00000009814	Uncharacterized protein [Source:UniProtKB/TrEMBL;Acc:F1RNP8]	gene	overlapping	0	1.18089	2.22114	3.18002
ANDR_PIG	X	60313335	60504856	+	NaN	AR	ENSSSCG00000012371	Androgen receptor [Source:UniProtKB/Swiss-Prot;Acc:Q9GKL7]	gene	overlapping	0	-2.99805	-2.30222	-2.64773
ANF_PIG	6	65830302	65830859	-	NaN	NPPA	ENSSSCG00000003430	Natriuretic peptides A Cardiodilatin-related peptide Atrial natriuretic factor [Source:UniProtKB/Swiss-Prot;Acc:P24259]	gene	overlapping	0	-2.99805	-2.30222	-2.64773
ANFB_PIG	6	65840061	65841530	-	NaN	NPPB	ENSSSCG00000003431	Natriuretic peptides B Brain natriuretic peptide 32 Brain natriuretic peptide 26 [Source:UniProtKB/Swiss-Prot;Acc:P07634]	gene	overlapping	0	-0.799735	-0.810913	-2.1624
ANFC_PIG	15	146347596	146350879	-	NaN	NPPC	ENSSSCG00000026852	C-type natriuretic peptide CNP-22 CNP-29 CNP-53 [Source:UniProtKB/Swiss-Prot;Acc:P18104]	gene	overlapping	0	-2.99805	-2.30222	-2.64773
ANGEL1	7	105992708	105999604	+	NaN	ANGEL1	ENSSSCG00000002390	Uncharacterized protein [Source:UniProtKB/TrEMBL;Acc:F1S2N7]	gene	overlapping	0	-2.99805	-2.30222	-2.64773
ANGEL2	9	143381057	143398326	+	NaN	ANGEL2	ENSSSCG00000015588	Uncharacterized protein [Source:UniProtKB/TrEMBL;Acc:F1S2X8]	gene	overlapping	0	1.91532	2.17123	2.3402
ANGL4_PIG	2	71271944	71279720	-	NaN	ANGPTL4	ENSSSCG00000013599	Angiopoietin-related protein 4 [Source:UniProtKB/Swiss-Prot;Acc:Q2TNK5]	gene	overlapping	0	-2.99805	-2.30222	-1.26373
ANGP1_PIG	4	32646859	32751650	+	NaN	ANGPT1	ENSSSCG00000006035	Angiopoietin-1 [Source:UniProtKB/Swiss-Prot;Acc:Q9BDY8]	gene	overlapping	0	-1.78941	-2.30222	-2.59706
ANGP2_PIG	15	42685042	42787678	-	NaN	MCPH1	ENSSSCG00000021516	microcephalin 1 [Source:HGNC Symbol;Acc:6954]	gene	overlapping	0	0.818737	2.00616	1.183
ANGPT4	17	39069492	39114089	+	NaN	ANGPT4	ENSSSCG00000007198	Uncharacterized protein [Source:UniProtKB/TrEMBL;Acc:F1S867]	gene	overlapping	0	-2.99805	-2.30222	-2.64773
ANGPTL5	9	36559113	36576174	-	NaN	ANGPTL5	ENSSSCG00000014978	Uncharacterized protein [Source:UniProtKB/TrEMBL;Acc:F1SV75]	gene	overlapping	0	-2.99805	-2.30222	-2.64773
ANGPTL6	2	69275433	69278687	-	NaN	C19ORF66	ENSSSCG00000013664	hypothetical protein LOC100512458 [Source:RefSeq peptide;Acc:NP_001231250]	gene	overlapping	0	-2.99805	-1.58489	-2.64773
ANK1	17	12182620	12419338	-	NaN	ANK1	ENSSSCG00000007022	ankyrin 1, erythrocytic [Source:HGNC Symbol;Acc:492]	gene	overlapping	0	-2.99805	-2.30222	-2.64773
ANK2	8	117354892	117671790	-	NaN	ANK2	ENSSSCG00000009125	ankyrin 2, neuronal [Source:HGNC Symbol;Acc:493]	gene	overlapping	0	2.01136	0.189087	2.7881
ANK3	14	68392355	68781879	-	NaN	ANK3	ENSSSCG00000010212	ankyrin 3, node of Ranvier (ankyrin G) [Source:HGNC Symbol;Acc:494]	gene	overlapping	0	3.18375	1.583	0.272046
ANKAR	15	105314258	105373846	+	NaN	ANKAR	ENSSSCG00000016042	Uncharacterized protein [Source:UniProtKB/TrEMBL;Acc:F1RXU8]	gene	overlapping	0	-2.99805	-1.09358	-1.66128
ANKDD1A	1	117811684	117851512	+	NaN	ANKDD1A	ENSSSCG00000004545	Uncharacterized protein [Source:UniProtKB/TrEMBL;Acc:F1S0B6]	gene	overlapping	0	-2.99805	-2.30222	-2.64773
ANKDD1B	2	86257325	86321705	+	NaN	ANKDD1B	ENSSSCG00000014083	Uncharacterized protein [Source:UniProtKB/TrEMBL;Acc:F1S2I1]	gene	overlapping	0	-2.41906	-2.30222	-2.26373
ANKFN1	12	33480572	33634826	+	NaN	ANKFN1	ENSSSCG00000017609	Uncharacterized protein [Source:UniProtKB/TrEMBL;Acc:F1RSD9]	gene	overlapping	0	-2.99805	-2.30222	-2.64773
ANKFY1	12	52127978	52181196	-	NaN	ANKFY1	ENSSSCG00000017877	Uncharacterized protein [Source:UniProtKB/TrEMBL;Acc:F1RGQ6]	gene	overlapping	0	2.82401	3.41107	2.22591
ANKH	16	4446886	4611009	-	NaN	ANKH	ENSSSCG00000016784	Uncharacterized protein [Source:UniProtKB/TrEMBL;Acc:F1SRN1]	gene	overlapping	0	-1.84007	-2.25156	-2.64773
ANKIB1	9	78959290	79055645	+	NaN	ANKIB1	ENSSSCG00000015314	Uncharacterized protein [Source:UniProtKB/TrEMBL;Acc:F1SFC9]	gene	overlapping	0	3.78321	3.54339	4.2709
ANKMY1	15	154473743	154507383	+	NaN	ANKMY1	ENSSSCG00000016365	Uncharacterized protein [Source:UniProtKB/TrEMBL;Acc:F1SIQ4]	gene	overlapping	0	-2.99805	-2.30222	-2.64773
ANKMY2	9	94689018	94713102	-	NaN	ANKMY2	ENSSSCG00000015360	Uncharacterized protein [Source:UniProtKB/TrEMBL;Acc:F1SEJ0]	gene	overlapping	0	3.8742	2.82472	2.69391
ANKR1_PIG	14	111715049	111724029	-	NaN	ANKRD1	ENSSSCG00000010461	Ankyrin repeat domain-containing protein 1 [Source:UniProtKB/Swiss-Prot;Acc:Q865U8]	gene	overlapping	0	-1.03506	-0.18609	0.00155536
ANKRA2	2	84227118	84240191	+	NaN	ANKRA2	ENSSSCG00000014070	Uncharacterized protein [Source:UniProtKB/TrEMBL;Acc:F1S2K0]	gene	overlapping	0	1.86425	2.08636	1.59437
ANKRD11	6	758642	770636	+	NaN	ANKRD11	ENSSSCG00000022410	ankyrin repeat domain 11 [Source:HGNC Symbol;Acc:21316]	gene	overlapping	0	0.286867	-0.672567	-1.27728
ANKRD12	6	92036189	92126942	-	NaN	ANKRD12	ENSSSCG00000003682	Uncharacterized protein [Source:UniProtKB/TrEMBL;Acc:F1SM99]	gene	overlapping	0	5.2463	4.77567	4.93546
ANKRD13A	14	43479365	43506038	-	NaN	ANKRD13A	ENSSSCG00000009924	Uncharacterized protein [Source:UniProtKB/TrEMBL;Acc:F1RIT7]	gene	overlapping	0	2.48478	2.64688	3.03453
ANKRD13B	12	47940122	47946308	+	NaN	ANKRD13B	ENSSSCG00000017793	Uncharacterized protein [Source:UniProtKB/TrEMBL;Acc:F1RN74]	gene	overlapping	0	-2.99805	-2.30222	-2.64773
ANKRD13C	6	132080136	132189620	+	NaN	ANKRD13C	ENSSSCG00000003790	Uncharacterized protein [Source:UniProtKB/TrEMBL;Acc:F1S834]	gene	overlapping	0	4.54125	4.45303	4.21346
ANKRD13D	2	3976503	3990125	-	NaN	ANKRD13D	ENSSSCG00000012917	ankyrin repeat domain 13 family, member D [Source:HGNC Symbol;Acc:27880]	gene	overlapping	0	-2.23005	-2.30222	-2.64773
ANKRD16	10	71224764	71238037	+	NaN	ANKRD16	ENSSSCG00000028790	ankyrin repeat domain 16 [Source:HGNC Symbol;Acc:23471]	gene	overlapping	0	-1.24532	0.434742	0.830031
ANKRD2	14	118448761	118462197	+	NaN	ANKRD2	ENSSSCG00000010522	Ankyrin repeat domain-containing protein 2 [Source:UniProtKB/TrEMBL;Acc:G9B792]	gene	overlapping	0	-2.99805	-2.30222	-2.64773
ANKRD22	14	109732654	109744247	-	NaN	ANKRD22	ENSSSCG00000010445	Uncharacterized protein [Source:UniProtKB/TrEMBL;Acc:F1SCY9]	gene	overlapping	0	2.99775	2.81587	-2.06874
ANKRD23	3	59227039	59231351	-	NaN	ZAP70	ENSSSCG00000008193	Uncharacterized protein [Source:UniProtKB/TrEMBL;Acc:F1STD6]	gene	overlapping	0	-1.67826	-2.30222	-2.64773
ANKRD24	2	75035749	75059513	-	NaN	ANKRD24	ENSSSCG00000013497	ankyrin repeat domain 24 [Source:HGNC Symbol;Acc:29424]	gene	overlapping	0	-1.39943	-2.30222	-2.26373
ANKRD27	6	38009555	38169870	-	NaN	ANKRD27	ENSSSCG00000002859	Uncharacterized protein [Source:UniProtKB/TrEMBL;Acc:F1RNY3]	gene	overlapping	0	3.42588	3.0792	1.77252
ANKRD29	6	101059851	101103509	-	NaN	ANKRD29	ENSSSCG00000003708	Uncharacterized protein [Source:UniProtKB/TrEMBL;Acc:F1SBB4]	gene	overlapping	0	2.45323	1.64936	3.12501
ANKRD31	2	85774886	85807199	-	NaN	ANKRD31	ENSSSCG00000014079	Uncharacterized protein [Source:UniProtKB/TrEMBL;Acc:F1S2I5]	gene	overlapping	0	-1.55741	-2.20089	-0.595582
ANKRD32	2	104867963	104919387	+	NaN	ANKRD32	ENSSSCG00000014163	Uncharacterized protein [Source:UniProtKB/TrEMBL;Acc:F1RNW0]	gene	overlapping	0	-0.505258	1.22707	2.79616
ANKRD33	5	17835519	17838166	+	NaN	ANKRD33	ENSSSCG00000000231	ankyrin repeat domain 33 [Source:HGNC Symbol;Acc:13788]	gene	overlapping	0	-2.99805	-2.30222	-2.64773
ANKRD33B	16	86762462	86840982	-	NaN	ANKRD33B	ENSSSCG00000017124	Uncharacterized protein [Source:UniProtKB/TrEMBL;Acc:F1S013]	gene	overlapping	0	-2.99805	-2.30222	-2.64773
ANKRD34B	2	91004486	91006027	-	NaN	ANKRD34B	ENSSSCG00000014124	Uncharacterized protein [Source:UniProtKB/TrEMBL;Acc:F1RF21]	gene	overlapping	0	-2.61405	-1.91822	-2.06874
ANKRD34C	7	53954680	53956287	+	NaN	ANKRD34C	ENSSSCG00000001772	Uncharacterized protein [Source:UniProtKB/TrEMBL;Acc:F1RKR5]	gene	overlapping	0	-2.99805	-2.25156	-2.64773
ANKRD35	4	109085351	109102969	+	NaN	ANKRD35	ENSSSCG00000006688	Uncharacterized protein [Source:UniProtKB/TrEMBL;Acc:F1SDE0]	gene	overlapping	0	0.0517816	0.147243	-1.35141
ANKRD37	15	53346645	53349699	-	NaN	ANKRD37	ENSSSCG00000015798	Uncharacterized protein [Source:UniProtKB/TrEMBL;Acc:F1RZN8]	gene	overlapping	0	-2.08573	-2.20089	1.33489
ANKRD39	3	59233939	59245811	-	NaN	ZAP70	ENSSSCG00000008193	Uncharacterized protein [Source:UniProtKB/TrEMBL;Acc:F1STD6]	gene	overlapping	0	1.259	-0.0935787	-2.26373
ANKRD40	12	27120716	27136155	-	NaN	ANKRD40	ENSSSCG00000017560	Uncharacterized protein [Source:UniProtKB/TrEMBL;Acc:F1RTB2]	gene	overlapping	0	0.122916	0.772066	-1.19343
ANKRD42	9	19247964	19320298	+	NaN	ANKRD42	ENSSSCG00000014902	Uncharacterized protein [Source:UniProtKB/TrEMBL;Acc:F1STU8]	gene	overlapping	0	1.39304	2.19057	3.57257
ANKRD43	2	140608193	140609920	+	NaN	ANKRD43	ENSSSCG00000014286	Uncharacterized protein [Source:UniProtKB/TrEMBL;Acc:F1RJU8]	gene	overlapping	0	-2.17341	-2.30222	-2.64773
ANKRD44	15	112052130	112388886	-	NaN	ANKRD44	ENSSSCG00000016074	Uncharacterized protein [Source:UniProtKB/TrEMBL;Acc:F1SN09]	gene	overlapping	0	2.57945	3.36404	0.880699
ANKRD45	9	127596085	127615189	-	NaN	ANKRD45	ENSSSCG00000015491	Uncharacterized protein [Source:UniProtKB/TrEMBL;Acc:F1S743]	gene	overlapping	0	-2.0116	-1.3899	-0.684742
ANKRD49	9	30388259	30396534	+	NaN	MRE11A	ENSSSCG00000014955	Uncharacterized protein [Source:UniProtKB/TrEMBL;Acc:F1STJ9]	gene	overlapping	0	1.82619	0.875385	3.45732
ANKRD5	17	21433502	21453079	+	NaN	ANKRD5	ENSSSCG00000007063	Uncharacterized protein [Source:UniProtKB/TrEMBL;Acc:F1SBK5]	gene	overlapping	0	-2.99805	-2.30222	-2.64773
ANKRD52	5	23011022	23025031	+	NaN	ERBB3	ENSSSCG00000020725	Uncharacterized protein [Source:UniProtKB/TrEMBL;Acc:F1SPI8]	gene	overlapping	0	0.968267	1.11023	-1.5464
ANKRD54	5	7499878	7513808	+	NaN	ANKRD54	ENSSSCG00000000120	ankyrin repeat domain 54 [Source:HGNC Symbol;Acc:25185]	gene	overlapping	0	-0.210417	2.00386	3.71232
ANKRD55	16	37297285	37395897	+	NaN	ANKRD55	ENSSSCG00000016917	Uncharacterized protein [Source:UniProtKB/TrEMBL;Acc:F1SLL0]	gene	overlapping	0	-1.38057	-2.25156	-2.64773
ANKRD56	8	76739721	76742120	-	NaN	ANKRD56	ENSSSCG00000008985	Uncharacterized protein [Source:UniProtKB/TrEMBL;Acc:F1RYS6]	gene	overlapping	0	1.78353	1.84435	-0.577433
ANKRD58	X	113454156	113455121	-	NaN	ANKRD58	ENSSSCG00000012618	Uncharacterized protein [Source:UniProtKB/TrEMBL;Acc:F1RUA2]	gene	overlapping	0	-2.99805	-2.30222	-2.64773
ANKRD6	1	64482243	64542250	+	NaN	ANKRD6	ENSSSCG00000004322	Uncharacterized protein [Source:UniProtKB/TrEMBL;Acc:F1S0C5]	gene	overlapping	0	-1.7139	-0.376244	-1.36358
ANKRD61	3	5158737	5163142	-	NaN	EIF2AK1	ENSSSCG00000007592	Uncharacterized protein [Source:UniProtKB/TrEMBL;Acc:F1RFM6]	gene	overlapping	0	-2.41906	-2.25156	-2.64773
ANKRD65	6	58284837	58286602	-	NaN	ANKRD65	ENSSSCG00000003346	Uncharacterized protein [Source:UniProtKB/TrEMBL;Acc:F1RJE1]	gene	overlapping	0	-2.99805	-2.30222	-2.64773
ANKRD7	18	29856726	29865911	+	NaN	ANKRD7	ENSSSCG00000016623	Uncharacterized protein [Source:UniProtKB/TrEMBL;Acc:F1SJF3]	gene	overlapping	0	-2.99805	-2.30222	-2.64773
ANKRD9	7	129270533	129271648	+	NaN	ANKRD9	ENSSSCG00000002527	Uncharacterized protein [Source:UniProtKB/TrEMBL;Acc:F1SA09]	gene	overlapping	0	0.0897375	-0.598436	1.94067
ANKS1A	7	35556631	35766117	+	NaN	ANKS1A	ENSSSCG00000001534	Ankyrin repeat and sterile alpha motif domain-containing 1A [Source:UniProtKB/TrEMBL;Acc:F8SIP9]	gene	overlapping	0	2.68339	3.06799	1.93734
ANKS1B	5	88424826	88439171	-	NaN	ANKS1B	ENSSSCG00000000881	ankyrin repeat and sterile alpha motif domain containing 1B [Source:HGNC Symbol;Acc:24600]	gene	overlapping	0	-2.61405	-2.30222	-2.64773
ANKS1B	5	88859059	89064764	+	NaN	ANKS1B	ENSSSCG00000000882	Uncharacterized protein [Source:UniProtKB/TrEMBL;Acc:F1SQT6]	gene	overlapping	0	-2.99805	-2.30222	-2.64773
ANKS3	3	38730150	38751123	+	NaN	ANKS3	ENSSSCG00000007939	ankyrin repeat and sterile alpha motif domain containing 3 [Source:HGNC Symbol;Acc:29422]	gene	overlapping	0	0.887177	1.40371	1.29667
ANKS4B	3	25642519	25654502	-	NaN	ANKS4B	ENSSSCG00000007850	Uncharacterized protein [Source:UniProtKB/TrEMBL;Acc:F1RPC7]	gene	overlapping	0	-2.03506	-1.86755	-1.04911
ANKS6	1	268772801	268829477	-	NaN	ANKS6	ENSSSCG00000005378	Uncharacterized protein [Source:UniProtKB/TrEMBL;Acc:F1SSF0]	gene	overlapping	0	-1.39943	-2.25156	-2.64773
ANKUB1	13	98042555	98068880	-	NaN	ANKUB1	ENSSSCG00000011706	Uncharacterized protein [Source:UniProtKB/TrEMBL;Acc:F1SJN8]	gene	overlapping	0	-2.99805	-2.30222	-2.64773
ANKZF1	15	134300649	134309215	+	NaN	GLB1L	ENSSSCG00000016213	Uncharacterized protein [Source:UniProtKB/TrEMBL;Acc:F1SR82]	gene	overlapping	0	2.30573	1.52158	1.27391
ANLN	18	41294200	41348331	-	NaN	ANLN	ENSSSCG00000016658	Uncharacterized protein [Source:UniProtKB/TrEMBL;Acc:F1SIM2]	gene	overlapping	0	7.37764	7.78243	7.62415
ANO1	2	1866961	1902581	-	NaN	ANO1	ENSSSCG00000012869	Uncharacterized protein [Source:UniProtKB/TrEMBL;Acc:F1RY81]	gene	overlapping	0	-2.99805	-2.30222	-2.64773
ANO10	13	29629877	29791476	-	NaN	ANO10	ENSSSCG00000011296	Uncharacterized protein [Source:UniProtKB/TrEMBL;Acc:F1SRD2]	gene	overlapping	0	2.14852	2.85405	0.919851
ANO2	5	67262222	67277839	-	NaN	ANO2	ENSSSCG00000000713	Uncharacterized protein [Source:UniProtKB/TrEMBL;Acc:F1SL12]	gene	overlapping	0	-2.94738	-2.30222	-2.64773
ANO3	2	36225783	36430350	-	NaN	ANO3	ENSSSCG00000013339	Uncharacterized protein [Source:UniProtKB/TrEMBL;Acc:F1SFZ6]	gene	overlapping	0	-2.99805	-2.30222	-2.64773
ANO4	5	87094797	87321631	-	NaN	ANO4	ENSSSCG00000000873	anoctamin 4 [Source:HGNC Symbol;Acc:23837]	gene	overlapping	0	-2.61405	-2.30222	-1.29477
ANO5	2	40382284	40466246	-	NaN	ANO5	ENSSSCG00000013344	Uncharacterized protein [Source:UniProtKB/TrEMBL;Acc:F1SFZ1]	gene	overlapping	0	4.01897	3.62282	-0.0599195
ANO6	5	79126662	79217840	+	NaN	ANO6	ENSSSCG00000000804	Uncharacterized protein [Source:UniProtKB/TrEMBL;Acc:F1SGY2]	gene	overlapping	0	7.25386	7.25203	6.62416
ANP32B	1	268013289	268037409	+	NaN	ANP32B	ENSSSCG00000005372	acidic (leucine-rich) nuclear phosphoprotein 32 family, member B [Source:HGNC Symbol;Acc:16677]	gene	overlapping	0	7.377	7.00347	8.34127
ANTXR1	3	76587951	76839636	-	NaN	ANTXR1	ENSSSCG00000008340	Uncharacterized protein [Source:UniProtKB/TrEMBL;Acc:F1SPM5]	gene	overlapping	0	-0.0621066	-0.672567	-2.06874
ANTXR2	8	146872576	146964111	+	NaN	ANTXR2	ENSSSCG00000009256	Uncharacterized protein [Source:UniProtKB/TrEMBL;Acc:F1RVC2]	gene	overlapping	0	-2.41906	-2.30222	-2.64773
ANTXRL	14	95827117	95864664	-	NaN	ANTXRL	ENSSSCG00000010371	anthrax toxin receptor-like [Source:HGNC Symbol;Acc:27277]	gene	overlapping	0	-2.99805	-2.30222	-2.64773
ANUBL1	14	98686346	98753360	+	NaN	ANUBL1	ENSSSCG00000010402	Uncharacterized protein [Source:UniProtKB/TrEMBL;Acc:F1SDV0]	gene	overlapping	0	-0.424098	-0.329318	-0.87973
ANXA1_PIG	1	252989614	253007579	+	NaN	ANXA1	ENSSSCG00000005267	Annexin A1 [Source:UniProtKB/Swiss-Prot;Acc:P19619]	gene	overlapping	0	7.9468	7.42412	5.64148
ANXA10	14	22604226	22642292	+	NaN	ANXA10	ENSSSCG00000030058	annexin A10 [Source:HGNC Symbol;Acc:534]	gene	overlapping	0	-2.99805	-2.30222	-2.64773
ANXA10	16	78138221	78147207	+	NaN	ANXA10	ENSSSCG00000017090	Annexin [Source:UniProtKB/TrEMBL;Acc:F1S0V2]	gene	overlapping	0	4.02998	4.56677	3.29168
ANXA11	14	88448385	88490575	+	NaN	ANXA11	ENSSSCG00000010331	Annexin [Source:UniProtKB/TrEMBL;Acc:F1S2E2]	gene	overlapping	0	4.76292	4.67851	3.87313
ANXA13	4	16450289	16486813	+	NaN	ANXA13	ENSSSCG00000005979	Annexin [Source:UniProtKB/TrEMBL;Acc:F1RRP6]	gene	overlapping	0	-2.99805	-2.30222	-2.64773
ANXA4_PIG	3	76060039	76128752	-	NaN	ANXA4	ENSSSCG00000008336	Annexin A4 [Source:UniProtKB/Swiss-Prot;Acc:P08132]	gene	overlapping	0	5.98866	5.5223	4.40966
ANXA5	8	109609049	109642588	+	NaN	ANXA5	ENSSSCG00000009097	annexin A5 [Source:HGNC Symbol;Acc:543]	gene	overlapping	0	5.55725	6.30559	3.82469
ANXA6	16	78094269	78115994	-	NaN	ANXA6	ENSSSCG00000017089	Annexin [Source:UniProtKB/TrEMBL;Acc:F1S0V3]	gene	overlapping	0	5.36939	4.35259	3.72275
ANXA7	14	82330744	82360270	-	NaN	ANXA7	ENSSSCG00000010299	Annexin [Source:UniProtKB/TrEMBL;Acc:F1SU59]	gene	overlapping	0	4.32642	3.7295	4.16118
AOAH	18	41062876	41246184	+	NaN	AOAH	ENSSSCG00000016657	Uncharacterized protein [Source:UniProtKB/TrEMBL;Acc:F1SIM3]	gene	overlapping	0	-2.0116	-2.30222	-2.64773
AOC2	12	20236896	20241867	-	NaN	AOC2	ENSSSCG00000017384	Amine oxidase [Source:UniProtKB/TrEMBL;Acc:F1S1G7]	gene	overlapping	0	-2.99805	-1.72324	-2.64773
AOC3	12	20231727	20236169	-	NaN	AOC3	ENSSSCG00000017383	Amine oxidase [Source:UniProtKB/TrEMBL;Acc:F1S1G8]	gene	overlapping	0	-2.99805	-2.30222	-2.64773
AOF2	6	74939243	75075051	+	NaN	AOF2	ENSSSCG00000003531	lysine-specific histone demethylase 1A [Source:RefSeq peptide;Acc:NP_001106157]	gene	overlapping	0	4.67663	5.22643	5.52787
AOFA_PIG	X	43132740	43208711	-	NaN	MAOA	ENSSSCG00000012257	Amine oxidase [flavin-containing] A [Source:UniProtKB/Swiss-Prot;Acc:Q6Q2J0]	gene	overlapping	0	-2.99805	-2.30222	-2.64773
AOFB_PIG	X	43355512	43474320	-	NaN	MAOB	ENSSSCG00000023215	Amine oxidase [flavin-containing] B [Source:UniProtKB/Swiss-Prot;Acc:Q6PLK3]	gene	overlapping	0	-2.99805	-2.30222	-2.64773
AOX1	15	115429403	115506114	+	NaN	AOX1	ENSSSCG00000029606	aldehyde oxidase 1 [Source:HGNC Symbol;Acc:553]	gene	overlapping	0	-1.67826	-0.847924	-2.64773
AOX1	15	115793358	115865400	-	NaN	AOX1	ENSSSCG00000016093	Uncharacterized protein [Source:UniProtKB/TrEMBL;Acc:F1SI66]	gene	overlapping	0	-2.99805	-2.30222	-2.64773
AP1AR	8	118369021	118401177	-	NaN	AP1AR	ENSSSCG00000009128	Uncharacterized protein [Source:UniProtKB/TrEMBL;Acc:F1S142]	gene	overlapping	0	3.06563	1.49826	2.72653
AP1B1	14	49434333	49485254	-	NaN	AP1B1	ENSSSCG00000009978	Uncharacterized protein [Source:UniProtKB/TrEMBL;Acc:F1RFI2]	gene	overlapping	0	5.51348	5.78529	6.33592
AP1G1	6	14338271	14399420	-	NaN	AP1G1	ENSSSCG00000002740	Uncharacterized protein [Source:UniProtKB/TrEMBL;Acc:F1S3C7]	gene	overlapping	0	6.70678	6.74321	6.91953
AP1G2	7	80848697	80863556	+	NaN	AP1G2	ENSSSCG00000002015	adaptor-related protein complex 1, gamma 2 subunit [Source:HGNC Symbol;Acc:556]	gene	overlapping	0	4.3776	4.70849	4.35752
AP1M2	2	69745812	69752189	+	NaN	AP1M2	ENSSSCG00000013636	Uncharacterized protein [Source:UniProtKB/TrEMBL;Acc:F1S587]	gene	overlapping	0	1.61239	2.7744	3.02953
AP1S2	X	13330621	13342001	-	NaN	AP1S2	ENSSSCG00000012142	Uncharacterized protein [Source:UniProtKB/TrEMBL;Acc:F1SQS7]	gene	overlapping	0	1.86183	3.26758	3.74895
AP2A1	6	50515464	50553289	+	NaN	AP2A1	ENSSSCG00000003199	Uncharacterized protein [Source:UniProtKB/TrEMBL;Acc:F1RH60]	gene	overlapping	0	5.43432	5.09547	4.57852
AP2A2	2	49279	94095	-	NaN	AP2A2	ENSSSCG00000012836	Uncharacterized protein [Source:UniProtKB/TrEMBL;Acc:F1RZ02]	gene	overlapping	0	3.51453	3.39585	1.55111
AP3B1	2	88734258	88766632	+	NaN	AP3B1	ENSSSCG00000027810	adaptor-related protein complex 3, beta 1 subunit [Source:HGNC Symbol;Acc:566]	gene	overlapping	0	4.04705	3.84712	3.41509
AP3B2	7	57742888	57780225	+	NaN	AP3B2	ENSSSCG00000001807	Uncharacterized protein [Source:UniProtKB/TrEMBL;Acc:F1RI97]	gene	overlapping	0	-0.86474	-0.982437	-2.64773
AP3D1	2	76963768	76965095	-	NaN	AP3D1	ENSSSCG00000013451	adaptor-related protein complex 3, delta 1 subunit [Source:HGNC Symbol;Acc:568]	gene	overlapping	0	1.21185	1.57434	0.856032
AP3M2	17	13140129	13164028	+	NaN	AP3M2	ENSSSCG00000007033	Uncharacterized protein [Source:UniProtKB/TrEMBL;Acc:F1SE19]	gene	overlapping	0	-2.99805	-1.47758	-2.64773
AP4A_PIG	10	36618624	36654366	-	NaN	NUDT2	ENSSSCG00000010981	Bis(5'-nucleosyl)-tetraphosphatase [asymmetrical] [Source:UniProtKB/Swiss-Prot;Acc:P50584]	gene	overlapping	0	2.65705	2.01373	1.40902
AP4B1	4	116862014	116874408	+	NaN	AP4B1	ENSSSCG00000006762	Uncharacterized protein [Source:UniProtKB/TrEMBL;Acc:F1SBR2]	gene	overlapping	0	2.64935	2.22433	-0.998445
AP4E1	1	134281042	134343747	-	NaN	AP4E1	ENSSSCG00000004634	Uncharacterized protein [Source:UniProtKB/TrEMBL;Acc:F1RYM9]	gene	overlapping	0	4.11628	3.35009	2.74594
AP5B1	2	5652042	5655474	+	NaN	AP5B1	ENSSSCG00000012978	adaptor-related protein complex 5, beta 1 subunit [Source:HGNC Symbol;Acc:25104]	gene	overlapping	0	-2.23005	-1.37624	-1.05992
APAF1	5	89443105	89581082	-	NaN	APAF1	ENSSSCG00000000884	Uncharacterized protein [Source:UniProtKB/TrEMBL;Acc:F1SQT5]	gene	overlapping	0	3.18081	3.33566	0.353236
APBA1	1	249028201	249062453	-	NaN	APBA1	ENSSSCG00000005250	Uncharacterized protein [Source:UniProtKB/TrEMBL;Acc:F1SJD2]	gene	overlapping	0	-1.41906	-1.91822	-2.64773
APBA3	2	75521565	75529547	+	NaN	APBA3	ENSSSCG00000013492	Uncharacterized protein [Source:UniProtKB/TrEMBL;Acc:F1S7P5]	gene	overlapping	0	1.11074	-0.144246	1.64776
APBB1	9	3964669	3977751	-	NaN	APBB1	ENSSSCG00000014628	amyloid beta (A4) precursor protein-binding, family B, member 1 (Fe65) [Source:HGNC Symbol;Acc:581]	gene	overlapping	0	-2.99805	-1.91822	-2.64773
APBB1IP	10	54365914	54403662	+	NaN	APBB1IP	ENSSSCG00000030156	amyloid beta (A4) precursor protein-binding, family B, member 1 interacting protein [Source:HGNC Symbol;Acc:17379]	gene	overlapping	0	-2.99805	-1.58489	-0.930398
APBB2	8	33236639	33426848	+	NaN	APBB2	ENSSSCG00000022168	Uncharacterized protein [Source:UniProtKB/TrEMBL;Acc:F1S4G9]	gene	overlapping	0	2.10058	2.65525	0.985252
APBB3	2	148258219	148264237	-	NaN	APBB3	ENSSSCG00000014366	Uncharacterized protein [Source:UniProtKB/TrEMBL;Acc:F1RGE6]	gene	overlapping	0	0.0118349	-0.319603	-1.21306
APCDD1L	17	65873038	65882164	-	NaN	APCDD1L	ENSSSCG00000007515	Uncharacterized protein [Source:UniProtKB/TrEMBL;Acc:F1RJR7]	gene	overlapping	0	-2.99805	-2.30222	-2.64773
APCS	4	99035619	99039834	+	NaN	APCS	ENSSSCG00000006409	Serum amyloid P-component [Source:UniProtKB/TrEMBL;Acc:F1RJ50]	gene	overlapping	0	-2.99805	-1.72323	-2.64773
APEX2	X	53798772	53806945	+	NaN	APEX2	ENSSSCG00000012348	Uncharacterized protein [Source:UniProtKB/TrEMBL;Acc:F1RUD3]	gene	overlapping	0	0.526067	1.45223	3.86946
APH1B	1	119981031	119988575	-	NaN	APH1B	ENSSSCG00000004567	anterior pharynx defective 1 homolog B (C. elegans) [Source:HGNC Symbol;Acc:24080]	gene	overlapping	0	-2.94738	-2.30222	-2.64773
API5	2	20668753	20698709	-	NaN	API5	ENSSSCG00000013285	Uncharacterized protein [Source:UniProtKB/TrEMBL;Acc:F1SHH7]	gene	overlapping	0	1.66054	1.51738	2.39684
APIP	2	28461562	28482421	+	NaN	PDHX	ENSSSCG00000013298	Uncharacterized protein [Source:UniProtKB/TrEMBL;Acc:F1SGT3]	gene	overlapping	0	1.81874	1.31389	2.59969
APLF	3	77284803	77362173	-	NaN	APLF	ENSSSCG00000008346	Uncharacterized protein [Source:UniProtKB/TrEMBL;Acc:F1SJ24]	gene	overlapping	0	1.82992	2.54505	1.69169
APLP1	6	40669815	40672021	+	NaN	APLP1	ENSSSCG00000002916	Uncharacterized protein [Source:UniProtKB/TrEMBL;Acc:F1RLF8]	gene	overlapping	0	-2.99805	-2.30222	-2.64773
APLP2	9	62965068	63035190	+	NaN	APLP2	ENSSSCG00000015244	Uncharacterized protein [Source:UniProtKB/TrEMBL;Acc:F1S6E8]	gene	overlapping	0	5.6139	4.46948	4.04786
APOA1_PIG	9	49288615	49290401	-	NaN	APOA1	ENSSSCG00000015070	Apolipoprotein A-I [Source:UniProtKB/Swiss-Prot;Acc:P18648]	gene	overlapping	0	2.8251	4.94677	3.15421
APOA1BP	9	143081133	143081773	+	NaN	APOA1BP	ENSSSCG00000015585	Apolipoprotein A-I-binding protein [Source:UniProtKB/TrEMBL;Acc:F1S2Y1]	gene	overlapping	0	-2.99805	-2.30222	-2.64773
APOA4_PIG	9	49273815	49276432	-	NaN	APOA4	ENSSSCG00000015068	Apolipoprotein A-IV [Source:UniProtKB/Swiss-Prot;Acc:O46409]	gene	overlapping	0	-2.99805	-2.30222	-2.64773
APOB	3	125228051	125253622	+	NaN	APOB	ENSSSCG00000008595	Uncharacterized protein [Source:UniProtKB/TrEMBL;Acc:F1SCV9]	gene	overlapping	0	-2.99805	-2.30222	-2.64773
APOBEC1	5	65642441	65650313	-	NaN	APOBEC1	ENSSSCG00000000668	Uncharacterized protein [Source:UniProtKB/TrEMBL;Acc:F1SLW4]	gene	overlapping	0	-0.738137	-1.31577	-2.64773
APOBEC4	9	137189416	137190516	-	NaN	APOBEC4	ENSSSCG00000015561	Uncharacterized protein [Source:UniProtKB/TrEMBL;Acc:F1S657]	gene	overlapping	0	-2.99805	-2.30222	-2.64773
APOC3_PIG	9	49283446	49285806	+	NaN	APOC3	ENSSSCG00000015069	Apolipoprotein C-III [Source:UniProtKB/Swiss-Prot;Acc:P27917]	gene	overlapping	0	2.40291	3.50316	2.40414
APOD	13	142079875	142096195	+	NaN	APOD	ENSSSCG00000011831	Uncharacterized protein [Source:UniProtKB/TrEMBL;Acc:F1SQX9]	gene	overlapping	0	-2.99805	-2.30222	-2.64773
APOE_PIG	6	47269970	47272195	+	NaN	PRR2	ENSSSCG00000003090	poliovirus receptor related 2 [Source:RefSeq peptide;Acc:NP_001090963]	gene	overlapping	0	2.05303	1.96455	1.13689
APOF	5	23295467	23296753	-	NaN	APOF	ENSSSCG00000000397	apolipoprotein F [Source:HGNC Symbol;Acc:615]	gene	overlapping	0	-2.99805	-1.72323	-2.64773
APOH	12	13142330	13154335	-	NaN	APOH	ENSSSCG00000017267	Uncharacterized protein [Source:UniProtKB/TrEMBL;Acc:F1RV16]	gene	overlapping	0	-2.99805	-1.91822	-2.64773
APOL6	5	9653340	9657283	+	NaN	APOL6	ENSSSCG00000000151	Uncharacterized protein [Source:UniProtKB/TrEMBL;Acc:F1SPT8]	gene	overlapping	0	-2.99805	-2.30222	-2.64773
APOM_PIG	7	27478638	27481151	-	NaN	APOM	ENSSSCG00000001411	Apolipoprotein M [Source:UniProtKB/Swiss-Prot;Acc:Q2LE37]	gene	overlapping	0	-2.99805	-2.30222	-1.73541
APOO	X	21323359	21366138	-	NaN	APOO	ENSSSCG00000012174	Uncharacterized protein [Source:UniProtKB/TrEMBL;Acc:F1SPZ9]	gene	overlapping	0	3.46675	3.79751	5.13524
APOOL	X	78073749	78104724	+	NaN	APOOL	ENSSSCG00000012459	Uncharacterized protein [Source:UniProtKB/TrEMBL;Acc:F1S1Q7]	gene	overlapping	0	3.25647	3.79958	4.40268
APOOL	X	78284663	78301669	+	NaN	APOOL	ENSSSCG00000024291	apolipoprotein O-like [Source:HGNC Symbol;Acc:24009]	gene	overlapping	0	-2.99805	-2.30222	-2.64773
APOR_PIG	9	74195616	74207951	+	NaN	APOR	ENSSSCG00000015663	Apolipoprotein R [Source:UniProtKB/Swiss-Prot;Acc:Q03472]	gene	overlapping	0	-2.99805	-2.30222	-2.64773
APP	13	199291020	199568630	-	NaN	APP	ENSSSCG00000012022	Amyloid beta A4 protein N-APP Soluble APP-alpha Soluble APP-beta C99 Beta-amyloid protein 42 Beta-amyloid protein 40 C83 P3(42) P3(40) C80 Gamma-secretase C-terminal fragment 59 Gamma-secretase C-terminal fragment 57 Gamma-secretase C-terminal fragment 50 C31 [Source:UniProtKB/Swiss-Prot;Acc:P79307]	gene	overlapping	0	2.7197	1.49287	-0.439087
APPBP2	12	39188231	39229805	-	NaN	APPBP2	ENSSSCG00000017678	Uncharacterized protein [Source:UniProtKB/TrEMBL;Acc:F1S207]	gene	overlapping	0	5.5917	5.24389	5.47942
APRT	6	1090009	1092355	-	NaN	APRT	ENSSSCG00000002650	Uncharacterized protein [Source:UniProtKB/TrEMBL;Acc:F1S6K5]	gene	overlapping	0	-2.99805	-2.30222	-2.64773
APRT	6	54614150	54617236	-	NaN	APRT	ENSSSCG00000029007	Uncharacterized protein [Source:UniProtKB/TrEMBL;Acc:F1S6K5]	gene	overlapping	0	-2.03506	-2.30222	-2.59706
APTX_PIG	10	37724514	37837919	+	NaN	APTX	ENSSSCG00000011001	Aprataxin [Source:UniProtKB/Swiss-Prot;Acc:Q7YRZ1]	gene	overlapping	0	2.93962	3.6387	2.46063
AQN1_PIG	6	43695821	43701169	-	NaN	AQN1_PIG	ENSSSCG00000021947	Carbohydrate-binding protein AQN-1 [Source:UniProtKB/Swiss-Prot;Acc:P26322]	gene	overlapping	0	-2.99805	-2.30222	-2.64773
AQP3_PIG	10	37307556	37313382	+	NaN	AQP3	ENSSSCG00000010991	Aquaporin-3 [Source:UniProtKB/Swiss-Prot;Acc:A9Y006]	gene	overlapping	0	6.70961	6.40906	6.62141
AQP5_PIG	5	16079293	16083026	-	NaN	AQP5	ENSSSCG00000000211	Aquaporin-5 [Source:UniProtKB/Swiss-Prot;Acc:A8W649]	gene	overlapping	0	-2.99805	-2.30222	-2.64773
ARAF_PIG	X	47388654	47400702	-	NaN	ARAF	ENSSSCG00000012275	Serine/threonine-protein kinase A-Raf [Source:UniProtKB/Swiss-Prot;Acc:O19004]	gene	overlapping	0	3.34988	3.44231	3.47495
ARAP1	9	7997861	8038741	-	NaN	ARAP1	ENSSSCG00000014817	ArfGAP with RhoGAP domain, ankyrin repeat and PH domain 1 [Source:HGNC Symbol;Acc:16925]	gene	overlapping	0	3.02128	1.57434	1.58354
ARAP2	8	29136986	29327348	-	NaN	ARAP2	ENSSSCG00000008768	Uncharacterized protein [Source:UniProtKB/TrEMBL;Acc:F1S4M1]	gene	overlapping	0	4.03759	4.23448	2.75086
ARAP3	2	149506500	149530200	-	NaN	ARAP3	ENSSSCG00000014391	Uncharacterized protein [Source:UniProtKB/TrEMBL;Acc:F1RM54]	gene	overlapping	0	-2.0116	-1.91822	-2.64773
ARCN1	9	50815863	50842000	-	NaN	ARCN1	ENSSSCG00000030053	archain 1 [Source:HGNC Symbol;Acc:649]	gene	overlapping	0	5.05357	5.28822	5.68378
ARF6_PIG	1	200074039	200074566	-	NaN	ARF6	ENSSSCG00000005012	ADP-ribosylation factor 6 [Source:UniProtKB/Swiss-Prot;Acc:Q007T5]	gene	overlapping	0	4.38202	3.45544	3.38679
ARFGAP3	5	3367604	3498052	+	NaN	ARFGAP3	ENSSSCG00000000037	Uncharacterized protein [Source:UniProtKB/TrEMBL;Acc:F1SJR4]	gene	overlapping	0	2.70637	3.17648	0.461059
ARFGEF1	4	73526342	73678155	+	NaN	ARFGEF1	ENSSSCG00000006201	Uncharacterized protein [Source:UniProtKB/TrEMBL;Acc:F1RU02]	gene	overlapping	0	6.30047	5.53794	6.89555
ARFGEF2	17	56982745	57082783	+	NaN	ARFGEF2	ENSSSCG00000007460	Uncharacterized protein [Source:UniProtKB/TrEMBL;Acc:F1SBE8]	gene	overlapping	0	5.4642	5.71654	5.60236
ARFIP1	8	80737174	80791597	-	NaN	ARFIP1	ENSSSCG00000009010	Uncharacterized protein [Source:UniProtKB/TrEMBL;Acc:F1RSB0]	gene	overlapping	0	5.62493	6.00824	6.05984
ARFIP2	9	3908518	3913433	+	NaN	ARFIP2	ENSSSCG00000014624	Uncharacterized protein [Source:UniProtKB/TrEMBL;Acc:F1RMN9]	gene	overlapping	0	1.49923	0.0643983	2.3005
ARG1	1	35463102	35466461	+	NaN	ARG1	ENSSSCG00000023773	Arginase-1 [Source:UniProtKB/TrEMBL;Acc:F1S3N2]	gene	overlapping	0	-2.56338	0.268909	-0.38842
ARG2	7	97650616	97695190	+	NaN	ARG2	ENSSSCG00000002294	Uncharacterized protein [Source:UniProtKB/TrEMBL;Acc:F1SA26]	gene	overlapping	0	7.58229	7.49175	8.28921
ARGFX	13	148555631	148557264	-	NaN	ARGFX	ENSSSCG00000011886	Uncharacterized protein [Source:UniProtKB/TrEMBL;Acc:F1SPD5]	gene	overlapping	0	-2.99805	-2.30222	-2.64773
ARGI1_PIG	1	35580461	35594611	-	NaN	ARG1	ENSSSCG00000004195	Arginase-1 [Source:UniProtKB/Swiss-Prot;Acc:Q95JC8]	gene	overlapping	0	6.24277	5.49096	3.55841
ARGLU1	11	81616020	81643873	-	NaN	ARGLU1	ENSSSCG00000009536	Uncharacterized protein [Source:UniProtKB/TrEMBL;Acc:F2Z517]	gene	overlapping	0	4.48023	4.87173	6.02791
ARHG2_PIG	4	102792202	102823366	+	NaN	ARHGEF2	ENSSSCG00000006502	Rho guanine nucleotide exchange factor 2 [Source:UniProtKB/Swiss-Prot;Acc:B2DCZ9]	gene	overlapping	0	-2.41906	-2.30222	-2.64773
ARHGAP1	2	17185709	17205243	+	NaN	ZNF408	ENSSSCG00000023097	zinc finger protein 408 [Source:HGNC Symbol;Acc:20041]	gene	overlapping	0	6.18033	5.22156	5.28399
ARHGAP11A	1	152625878	152647031	+	NaN	ARHGAP11A	ENSSSCG00000004806	Rho GTPase activating protein 11A [Source:HGNC Symbol;Acc:15783]	gene	overlapping	0	3.65684	5.41153	6.12933
ARHGAP12	10	47054283	47173388	-	NaN	ARHGAP12	ENSSSCG00000011026	Uncharacterized protein [Source:UniProtKB/TrEMBL;Acc:F1RWC6]	gene	overlapping	0	6.46139	6.17897	6.02425
ARHGAP20	9	43174648	43222583	+	NaN	ARHGAP20	ENSSSCG00000015015	Uncharacterized protein [Source:UniProtKB/TrEMBL;Acc:F1SV12]	gene	overlapping	0	-1.43261	-2.25156	-2.06874
ARHGAP21	10	56044599	56132190	+	NaN	ARHGAP21	ENSSSCG00000011074	Uncharacterized protein [Source:UniProtKB/TrEMBL;Acc:F1RVJ3]	gene	overlapping	0	6.47925	5.6398	4.98347
ARHGAP22	14	96946551	97088876	-	NaN	ARHGAP22	ENSSSCG00000010381	Uncharacterized protein [Source:UniProtKB/TrEMBL;Acc:F1SEK3]	gene	overlapping	0	-2.99805	-2.25156	-2.64773
ARHGAP23	12	63443656	63498864	-	NaN	ARHGAP23	ENSSSCG00000018058	Uncharacterized protein [Source:UniProtKB/TrEMBL;Acc:F1SB02]	gene	overlapping	0	-2.94738	-1.42691	-2.26373
ARHGAP24	8	142148085	142647169	-	NaN	ARHGAP24	ENSSSCG00000009229	Rho GTPase activating protein 24 [Source:HGNC Symbol;Acc:25361]	gene	overlapping	0	-2.41906	-2.30222	-2.64773
ARHGAP25	3	77045236	77096424	+	NaN	ARHGAP25	ENSSSCG00000008344	Uncharacterized protein [Source:UniProtKB/TrEMBL;Acc:F1SPM2]	gene	overlapping	0	-2.99805	-2.30222	-2.64773
ARHGAP26	2	150495712	150918983	+	NaN	ARHGAP26	ENSSSCG00000014399	Uncharacterized protein [Source:UniProtKB/TrEMBL;Acc:F1RM37]	gene	overlapping	0	1.90691	0.573088	-1.9304
ARHGAP27	12	18206639	18311004	+	NaN	ARHGAP27	ENSSSCG00000017328	Uncharacterized protein [Source:UniProtKB/TrEMBL;Acc:F1RR27]	gene	overlapping	0	-0.807786	1.86012	-0.577433
ARHGAP28	6	93656460	93818796	-	NaN	ARHGAP28	ENSSSCG00000003686	Uncharacterized protein [Source:UniProtKB/TrEMBL;Acc:F1SM88]	gene	overlapping	0	3.78893	3.10749	1.86814
ARHGAP29	4	134770845	134804046	+	NaN	ARHGAP29	ENSSSCG00000006889	Uncharacterized protein [Source:UniProtKB/TrEMBL;Acc:F1S540]	gene	overlapping	0	5.25404	4.22108	4.14876
ARHGAP30	4	97379620	97389584	-	NaN	ARHGAP30	ENSSSCG00000006372	Uncharacterized protein [Source:UniProtKB/TrEMBL;Acc:F1S177]	gene	overlapping	0	-2.99805	-0.0194478	-2.06874
ARHGAP31	13	150136496	150239384	-	NaN	ARHGAP31	ENSSSCG00000026224	Uncharacterized protein [Source:UniProtKB/TrEMBL;Acc:F1SPA5]	gene	overlapping	0	-0.570955	2.32257	1.70137
ARHGAP32	9	61997169	62189255	-	NaN	ARHGAP32	ENSSSCG00000015238	Uncharacterized protein [Source:UniProtKB/TrEMBL;Acc:F1S6F5]	gene	overlapping	0	4.71113	4.40333	2.94522
ARHGAP35	6	48128316	48215354	+	NaN	ARHGAP35	ENSSSCG00000003107	Rho GTPase activating protein 35 [Source:HGNC Symbol;Acc:4591]	gene	overlapping	0	7.10085	6.87272	6.80695
ARHGAP36	X	123543724	123552540	+	NaN	ARHGAP36	ENSSSCG00000012669	Uncharacterized protein [Source:UniProtKB/TrEMBL;Acc:F1RTF6]	gene	overlapping	0	-2.99805	-2.30222	-2.64773
ARHGAP4	X	142205930	142220033	-	NaN	ARHGAP4	ENSSSCG00000012790	Uncharacterized protein [Source:UniProtKB/TrEMBL;Acc:F1S291]	gene	overlapping	0	-2.99805	-2.30222	-2.64773
ARHGAP42	9	35927631	36003600	+	NaN	ARHGAP42	ENSSSCG00000014976	Uncharacterized protein [Source:UniProtKB/TrEMBL;Acc:F1STH9]	gene	overlapping	0	0.838142	2.20872	0.169056
ARHGAP44	12	60166898	60195261	-	NaN	ARHGAP44	ENSSSCG00000018019	Uncharacterized protein [Source:UniProtKB/TrEMBL;Acc:F1SS49]	gene	overlapping	0	0.890031	0.971887	2.95697
ARHGAP6	X	8472815	8617487	-	NaN	ARHGAP6	ENSSSCG00000012112	Uncharacterized protein [Source:UniProtKB/TrEMBL;Acc:F1SG15]	gene	overlapping	0	-2.99805	-1.91822	-2.64773
ARHGAP9	5	24827383	24838369	+	NaN	ARHGAP9	ENSSSCG00000000437	Uncharacterized protein [Source:UniProtKB/TrEMBL;Acc:F1SKH4]	gene	overlapping	0	0.118892	-2.25156	-1.48975
ARHGEF1	6	46032790	46046631	+	NaN	CXCL17	ENSSSCG00000003048	Uncharacterized protein [Source:UniProtKB/TrEMBL;Acc:F1RMX0]	gene	overlapping	0	0.179558	-0.93177	-1.08229
ARHGEF10L	6	70488562	70524285	-	NaN	ARHGEF10L	ENSSSCG00000003486	Rho guanine nucleotide exchange factor (GEF) 10-like [Source:HGNC Symbol;Acc:25540]	gene	overlapping	0	-2.99805	-2.30222	-2.64773
ARHGEF11	4	101505332	101731624	+	NaN	ARHGEF11	ENSSSCG00000006461	Uncharacterized protein [Source:UniProtKB/TrEMBL;Acc:F1RHK9]	gene	overlapping	0	2.2664	0.932422	1.27825
ARHGEF12	9	52649356	52729816	+	NaN	ARHGEF12	ENSSSCG00000015129	Uncharacterized protein [Source:UniProtKB/TrEMBL;Acc:F1S9S2]	gene	overlapping	0	5.61129	4.91964	3.49045
ARHGEF15	12	55971353	55980772	+	NaN	SLC25A35	ENSSSCG00000022395	solute carrier family 25, member 35 [Source:RefSeq peptide;Acc:NP_001230286]	gene	overlapping	0	-2.99805	-1.91822	-2.64773
ARHGEF16	6	59773507	59795001	+	NaN	ARHGEF16	ENSSSCG00000024223	Rho guanine nucleotide exchange factor (GEF) 16 [Source:HGNC Symbol;Acc:15515]	gene	overlapping	0	0.989884	-0.352781	-2.64773
ARHGEF17	9	8561507	8684017	+	NaN	ARHGEF17	ENSSSCG00000014822	Uncharacterized protein [Source:UniProtKB/TrEMBL;Acc:F1SUT6]	gene	overlapping	0	-2.08573	-2.30222	-2.64773
ARHGEF18	2	72178532	72198704	-	NaN	ARHGEF18	ENSSSCG00000013568	Uncharacterized protein [Source:UniProtKB/TrEMBL;Acc:F1SCK5]	gene	overlapping	0	2.83096	2.10886	2.61881
ARHGEF19	6	69633988	69645325	-	NaN	ARHGEF19	ENSSSCG00000003472	Uncharacterized protein [Source:UniProtKB/TrEMBL;Acc:F1SUS7]	gene	overlapping	0	-2.99805	-2.30222	-2.64773
ARHGEF26	13	102204789	102358092	+	NaN	ARHGEF26	ENSSSCG00000024205	Rho guanine nucleotide exchange factor (GEF) 26 [Source:HGNC Symbol;Acc:24490]	gene	overlapping	0	2.12898	0.949516	2.08923
ARHGEF3	13	42429444	42455740	-	NaN	ARHGEF3	ENSSSCG00000030359	Rho guanine nucleotide exchange factor (GEF) 3 [Source:HGNC Symbol;Acc:683]	gene	overlapping	0	-1.89672	-1.14425	-1.63407
ARHGEF33	3	107530264	107550665	-	NaN	ARHGEF33	ENSSSCG00000008481	Uncharacterized protein [Source:UniProtKB/TrEMBL;Acc:F1S4S7]	gene	overlapping	0	-2.99805	-2.25156	-2.64773
ARHGEF33	3	107558909	107563453	+	NaN	ARHGEF33	ENSSSCG00000021662	Rho guanine nucleotide exchange factor (GEF) 33 [Source:HGNC Symbol;Acc:37252]	gene	overlapping	0	-2.99805	-2.30222	-2.64773
ARHGEF35	9	124684453	124703547	-	NaN	ARHGEF35	ENSSSCG00000022525	Uncharacterized protein [Source:UniProtKB/TrEMBL;Acc:F1SAC6]	gene	overlapping	0	2.13497	0.197911	0.473235
ARHGEF35	9	124826938	124837375	+	NaN	ARHGEF35	ENSSSCG00000024603	Uncharacterized protein [Source:UniProtKB/TrEMBL;Acc:F1SAC6]	gene	overlapping	0	-0.984393	-1.58489	-2.64773
ARHGEF37	2	157445243	157501653	+	NaN	ARHGEF37	ENSSSCG00000014436	Uncharacterized protein [Source:UniProtKB/TrEMBL;Acc:F1RL91]	gene	overlapping	0	-2.99805	-2.30222	-2.64773
ARHGEF38	8	124634054	124723522	-	NaN	ARHGEF38	ENSSSCG00000009156	Uncharacterized protein [Source:UniProtKB/TrEMBL;Acc:F1S117]	gene	overlapping	0	-2.99805	-2.30222	-2.64773
ARHGEF6	X	127660523	127741866	-	NaN	ARHGEF6	ENSSSCG00000030460	Rac/Cdc42 guanine nucleotide exchange factor (GEF) 6 [Source:HGNC Symbol;Acc:685]	gene	overlapping	0	-2.99805	-2.30222	-2.64773
ARHGEF9	X	56579827	56723564	-	NaN	ARHGEF9	ENSSSCG00000012362	Uncharacterized protein [Source:UniProtKB/TrEMBL;Acc:F1RTP2]	gene	overlapping	0	-2.99805	-1.58489	-2.06874
ARID1A	6	77607451	77612795	-	NaN	ARID1A	ENSSSCG00000003559	Uncharacterized protein [Source:UniProtKB/TrEMBL;Acc:F1STS2]	gene	overlapping	0	3.83371	4.11806	3.95214
ARID1B	1	11849147	11894228	+	NaN	ARID1B	ENSSSCG00000004064	Uncharacterized protein [Source:UniProtKB/TrEMBL;Acc:F1SB28]	gene	overlapping	0	4.37689	3.49138	2.59925
ARID2	5	79566481	79726285	+	NaN	ARID2	ENSSSCG00000030685	Uncharacterized protein [Source:UniProtKB/TrEMBL;Acc:F1SGY0]	gene	overlapping	0	4.24543	3.94103	4.34211
ARID3A	2	77532598	77569043	+	NaN	ARID3A	ENSSSCG00000013414	Uncharacterized protein [Source:UniProtKB/TrEMBL;Acc:F1S6T2]	gene	overlapping	0	3.45788	3.56774	2.75251
ARID3B	7	63621165	63652662	-	NaN	ARID3B	ENSSSCG00000022812	Uncharacterized protein [Source:UniProtKB/TrEMBL;Acc:F1SIE5]	gene	overlapping	0	3.69041	3.68134	2.17561
ARID3C	10	36313982	36320929	+	NaN	ARID3C	ENSSSCG00000010971	Uncharacterized protein [Source:UniProtKB/TrEMBL;Acc:F1SEC1]	gene	overlapping	0	-1.94738	-2.30222	-2.06874
ARID4B	14	60090378	60187655	+	NaN	ARID4B	ENSSSCG00000010156	AT rich interactive domain 4B (RBP1-like) [Source:HGNC Symbol;Acc:15550]	gene	overlapping	0	4.92343	4.50177	4.88142
ARID5A	3	48848334	48860885	-	NaN	ARID5A	ENSSSCG00000008123	Uncharacterized protein [Source:UniProtKB/TrEMBL;Acc:F1SU48]	gene	overlapping	0	-0.701728	-1.33923	-0.961434
ARID5B	14	70609583	70684100	+	NaN	ARID5B	ENSSSCG00000010219	Uncharacterized protein [Source:UniProtKB/TrEMBL;Acc:F1RFC2]	gene	overlapping	0	3.65399	3.42528	-0.823088
ARIH1	7	65167884	65205814	+	NaN	BBS4	ENSSSCG00000001924	Uncharacterized protein [Source:UniProtKB/TrEMBL;Acc:F1SI91]	gene	overlapping	0	4.43605	4.66783	5.52746
ARIH2	13	34827039	34871361	+	NaN	ARIH2	ENSSSCG00000011367	Uncharacterized protein [Source:UniProtKB/TrEMBL;Acc:F1SKJ0]	gene	overlapping	0	3.82213	3.41894	2.88415
ARL10	2	83148202	83157648	-	NaN	ARL10	ENSSSCG00000029985	Uncharacterized protein [Source:UniProtKB/TrEMBL;Acc:F1S388]	gene	overlapping	0	1.39203	2.70719	1.19654
ARL11	11	18412947	18413495	-	NaN	ARL11	ENSSSCG00000009394	Uncharacterized protein [Source:UniProtKB/TrEMBL;Acc:F1RK21]	gene	overlapping	0	-2.99805	-2.30222	-2.64773
ARL13A	X	90599932	90610564	+	NaN	ARL13A	ENSSSCG00000012488	ADP-ribosylation factor-like 13A [Source:HGNC Symbol;Acc:31709]	gene	overlapping	0	-2.99805	-1.47758	-2.64773
ARL13B	13	176513526	176539039	-	NaN	ARL13B	ENSSSCG00000030683	ADP-ribosylation factor-like 13B [Source:HGNC Symbol;Acc:25419]	gene	overlapping	0	-2.41906	-1.86755	-1.43909
ARL14	13	108688054	108688632	+	NaN	ARL14	ENSSSCG00000011734	Uncharacterized protein [Source:UniProtKB/TrEMBL;Acc:F1SH48]	gene	overlapping	0	-2.99805	-1.91822	-2.64773
ARL15	16	35278525	35417710	-	NaN	ARL15	ENSSSCG00000016894	ADP-ribosylation factor-like 15 [Source:HGNC Symbol;Acc:25945]	gene	overlapping	0	1.66115	1.03719	2.41753
ARL17A	12	17474636	17479706	-	NaN	ARL17A	ENSSSCG00000017315	Uncharacterized protein [Source:UniProtKB/TrEMBL;Acc:F1RRS4]	gene	overlapping	0	-2.03506	-1.72324	-1.10575
ARL2	2	6289998	6299113	-	NaN	ARL2	ENSSSCG00000013013	Uncharacterized protein [Source:UniProtKB/TrEMBL;Acc:F1RQS8]	gene	overlapping	0	2.23471	0.542052	0.775531
ARL2BP	6	17198045	17205981	+	NaN	ARL2BP	ENSSSCG00000002819	Uncharacterized protein [Source:UniProtKB/TrEMBL;Acc:F1RF32]	gene	overlapping	0	2.39329	2.25536	2.65922
ARL3	14	123522331	123534493	-	NaN	ARL3	ENSSSCG00000010588	ADP-ribosylation factor-like protein 3 [Source:UniProtKB/TrEMBL;Acc:F1S854]	gene	overlapping	0	-2.61405	-1.14425	-2.06874
ARL4D	12	19790869	19792763	+	NaN	ARL4D	ENSSSCG00000017380	Uncharacterized protein [Source:UniProtKB/TrEMBL;Acc:F1S1H1]	gene	overlapping	0	-2.99805	-2.30222	-1.82906
ARL5B	10	77152282	77171805	-	NaN	ARL5B	ENSSSCG00000029023	ADP-ribosylation factor-like 5B [Source:HGNC Symbol;Acc:23052]	gene	overlapping	0	1.49934	1.63306	-0.466575
ARL6	13	172773894	172821180	-	NaN	ARL6	ENSSSCG00000027278	ADP-ribosylation factor-like 6 [Source:HGNC Symbol;Acc:13210]	gene	overlapping	0	0.502084	-0.47758	-1.44392
ARL6IP6	15	67086569	67118931	+	NaN	ARL6IP6	ENSSSCG00000015868	Uncharacterized protein [Source:UniProtKB/TrEMBL;Acc:F1RQH1]	gene	overlapping	0	3.95485	3.52936	4.30732
ARL8B	13	67874604	67921552	-	NaN	ARL8B	ENSSSCG00000011535	Uncharacterized protein [Source:UniProtKB/TrEMBL;Acc:F1SFL1]	gene	overlapping	0	2.15251	2.83789	2.88156
ARL9	8	57773543	57782897	-	NaN	ARL9	ENSSSCG00000008899	Uncharacterized protein [Source:UniProtKB/TrEMBL;Acc:F1RTV7]	gene	overlapping	0	-2.99805	-2.30222	-2.64773
ARMC2	1	84234297	84342178	+	NaN	ARMC2	ENSSSCG00000004388	armadillo repeat containing 2 [Source:HGNC Symbol;Acc:23045]	gene	overlapping	0	1.1717	0.0767419	-2.26373
ARMC3	10	57615454	57702468	-	NaN	ARMC3	ENSSSCG00000011078	Uncharacterized protein [Source:UniProtKB/TrEMBL;Acc:F1RVI7]	gene	overlapping	0	1.52253	1.4894	-0.526765
ARMC4	10	53394013	53520552	+	NaN	ARMC4	ENSSSCG00000011069	Uncharacterized protein [Source:UniProtKB/TrEMBL;Acc:F1RVJ8]	gene	overlapping	0	-2.99805	-1.91822	-2.59706
ARMC5	3	17362501	17367305	-	NaN	ARMC5	ENSSSCG00000025245	armadillo repeat containing 5 [Source:HGNC Symbol;Acc:25781]	gene	overlapping	0	-2.61405	-1.0059	-0.0822909
ARMC8	13	86663589	86696028	+	NaN	ARMC8	ENSSSCG00000011658	Uncharacterized protein [Source:UniProtKB/TrEMBL;Acc:F1SL67]	gene	overlapping	0	3.34412	3.75402	3.58777
ARMCX2	X	97076131	97078065	-	NaN	ARMCX2	ENSSSCG00000012510	Uncharacterized protein [Source:UniProtKB/TrEMBL;Acc:F1RYG8]	gene	overlapping	0	-2.99805	-2.30222	-2.64773
ARMCX3	X	97051605	97053543	+	NaN	ARMCX3	ENSSSCG00000012509	Uncharacterized protein [Source:UniProtKB/TrEMBL;Acc:F1RYG9]	gene	overlapping	0	-2.99805	-2.30222	-2.64773
ARMCX6	X	97042147	97043055	-	NaN	ARMCX6	ENSSSCG00000012508	Uncharacterized protein [Source:UniProtKB/TrEMBL;Acc:F1RYH0]	gene	overlapping	0	-2.99805	-2.30222	-2.64773
ARNT	4	107586820	107636206	+	NaN	ARNT	ENSSSCG00000006646	Uncharacterized protein [Source:UniProtKB/TrEMBL;Acc:F1SS94]	gene	overlapping	0	3.65998	3.7048	3.09372
ARNT2	7	54813733	54837749	+	NaN	ARNT2	ENSSSCG00000001781	aryl-hydrocarbon receptor nuclear translocator 2 [Source:HGNC Symbol;Acc:16876]	gene	overlapping	0	-2.99805	-2.30222	-2.64773
ARNTL2	5	49898643	49972779	-	NaN	ARNTL2	ENSSSCG00000000551	Uncharacterized protein [Source:UniProtKB/TrEMBL;Acc:F1SG81]	gene	overlapping	0	-1.23005	-1.58489	1.03259
ARP19_PIG	1	132202980	132222003	+	NaN	ARPP19	ENSSSCG00000004618	cAMP-regulated phosphoprotein 19 [Source:UniProtKB/Swiss-Prot;Acc:Q712U6]	gene	overlapping	0	5.87304	5.98215	6.19594
ARPP21	13	22755570	22907688	+	NaN	ARPP21	ENSSSCG00000011238	Uncharacterized protein [Source:UniProtKB/TrEMBL;Acc:F1RRD5]	gene	overlapping	0	4.49528	2.90099	1.64671
ARRB1	9	10735562	10759039	+	NaN	ARRB1	ENSSSCG00000014852	Uncharacterized protein [Source:UniProtKB/TrEMBL;Acc:F1SUN0]	gene	overlapping	0	0.441498	0.884209	1.825
ARRB2	12	54281399	54286346	-	NaN	ARRB2	ENSSSCG00000017918	Uncharacterized protein [Source:UniProtKB/TrEMBL;Acc:F1RFU0]	gene	overlapping	0	-2.99805	-2.25156	-2.64773
ARRC_PIG	X	63491381	63505224	+	NaN	ARR3	ENSSSCG00000012379	Arrestin-C [Source:UniProtKB/Swiss-Prot;Acc:Q7YS78]	gene	overlapping	0	-2.99805	-2.30222	-1.82309
ARRDC2	2	59339281	59343898	-	NaN	ARRDC2	ENSSSCG00000013893	Uncharacterized protein [Source:UniProtKB/TrEMBL;Acc:F1S922]	gene	overlapping	0	2.6113	3.38708	2.38072
ARRDC3	2	101569559	101583976	-	NaN	ARRDC3	ENSSSCG00000014156	Uncharacterized protein [Source:UniProtKB/TrEMBL;Acc:F1RNX8]	gene	overlapping	0	-1.59442	-0.672567	2.57297
ARRDC4	7	87588827	87598914	-	NaN	ARRDC4	ENSSSCG00000002252	Uncharacterized protein [Source:UniProtKB/TrEMBL;Acc:F1SCJ8]	gene	overlapping	0	0.044761	1.65573	-1.66128
ARRS_PIG	15	147812872	147835057	+	NaN	SAG	ENSSSCG00000016301	S-arrestin [Source:UniProtKB/Swiss-Prot;Acc:P79260]	gene	overlapping	0	-1.84007	-2.30222	-1.35141
ARSG	12	12219743	12359072	-	NaN	ARSG	ENSSSCG00000017261	Uncharacterized protein [Source:UniProtKB/TrEMBL;Acc:F1RV22]	gene	overlapping	0	-2.99805	-2.30222	-2.64773
ARSJ	8	116839714	116841212	+	NaN	ARSJ	ENSSSCG00000009122	arylsulfatase family, member J [Source:HGNC Symbol;Acc:26286]	gene	overlapping	0	0.0722484	0.70386	-2.64773
ARSK	2	95606107	95651949	+	NaN	ARSK	ENSSSCG00000014139	Uncharacterized protein [Source:UniProtKB/TrEMBL;Acc:F1REY9]	gene	overlapping	0	-2.99805	-1.31577	-2.64773
ART1	9	7194504	7198760	-	NaN	ART1	ENSSSCG00000014795	ADP-ribosyltransferase 1 [Source:HGNC Symbol;Acc:723]	gene	overlapping	0	-2.99805	-2.30222	-2.64773
ART5	9	7207331	7212089	+	NaN	ART5	ENSSSCG00000014798	Uncharacterized protein [Source:UniProtKB/TrEMBL;Acc:F1SUY8]	gene	overlapping	0	-2.99805	-2.30222	-2.64773
ARVCF	14	55036316	55059725	-	NaN	COMT	ENSSSCG00000010132	Catechol O-methyltransferase [Source:UniProtKB/Swiss-Prot;Acc:Q99028]	gene	overlapping	0	4.10893	2.42717	2.09215
ARX	X	22463822	22474529	-	NaN	ARX	ENSSSCG00000020801	aristaless related homeobox [Source:HGNC Symbol;Acc:18060]	gene	overlapping	0	-2.94738	-2.30222	-2.64773
AS3MT	14	123816085	123835880	+	NaN	AS3MT	ENSSSCG00000010592	Uncharacterized protein [Source:UniProtKB/TrEMBL;Acc:F1S850]	gene	overlapping	0	4.41807	0.896552	-0.0861228
ASAH1	17	6296100	6333861	-	NaN	ASAH1	ENSSSCG00000006995	N-acylsphingosine amidohydrolase (acid ceramidase) 1 [Source:HGNC Symbol;Acc:735]	gene	overlapping	0	6.72398	6.52525	3.47615
ASAH2	14	107865223	107969314	-	NaN	ASAH2	ENSSSCG00000010432	Uncharacterized protein [Source:UniProtKB/TrEMBL;Acc:F1SCZ9]	gene	overlapping	0	-2.99805	-2.30222	-2.59706
ASAP2	3	135295916	135379560	-	NaN	ASAP2	ENSSSCG00000008642	ArfGAP with SH3 domain, ankyrin repeat and PH domain 2 [Source:HGNC Symbol;Acc:2721]	gene	overlapping	0	5.18294	5.01607	4.42012
ASB1	15	152382675	152398097	+	NaN	ASB1	ENSSSCG00000016340	Uncharacterized protein [Source:UniProtKB/TrEMBL;Acc:F1SIU7]	gene	overlapping	0	-1.53141	-2.25156	-1.43909
ASB10	18	6403929	6413716	+	NaN	ASB10	ENSSSCG00000029241	ankyrin repeat and SOCS box containing 10 [Source:HGNC Symbol;Acc:17185]	gene	overlapping	0	-2.99805	-2.30222	-2.64773
ASB13	10	71403808	71417802	+	NaN	ASB13	ENSSSCG00000011145	Uncharacterized protein [Source:UniProtKB/TrEMBL;Acc:F1RYV8]	gene	overlapping	0	1.02306	0.347064	0.668222
ASB15	18	25425505	25444223	-	NaN	ASB15	ENSSSCG00000016606	Uncharacterized protein [Source:UniProtKB/TrEMBL;Acc:F1SLY3]	gene	overlapping	0	-2.99805	-2.25156	-2.64773
ASB18	15	150485595	150550295	-	NaN	ASB18	ENSSSCG00000016318	ankyrin repeat and SOCS box containing 18 [Source:HGNC Symbol;Acc:19770]	gene	overlapping	0	-2.99805	-2.30222	-2.64773
ASB2	7	122012985	122043651	+	NaN	ASB2	ENSSSCG00000002467	Uncharacterized protein [Source:UniProtKB/TrEMBL;Acc:F1SCH0]	gene	overlapping	0	-2.99805	-2.30222	-2.64773
ASB4	9	82488676	82579652	+	NaN	ASB4	ENSSSCG00000015333	Uncharacterized protein [Source:UniProtKB/TrEMBL;Acc:F1SF90]	gene	overlapping	0	-2.99805	-2.30222	-2.64773
ASB5	15	44410073	44464546	-	NaN	ASB5	ENSSSCG00000030395	Uncharacterized protein [Source:UniProtKB/TrEMBL;Acc:F1RT33]	gene	overlapping	0	-2.99805	-2.30222	-2.59706
ASB7	1	155405691	155444614	+	NaN	ASB7	ENSSSCG00000004821	Uncharacterized protein [Source:UniProtKB/TrEMBL;Acc:F2Z5S9]	gene	overlapping	0	3.07661	2.25818	3.48127
ASB8	5	81696220	81701871	-	NaN	ASB8	ENSSSCG00000021024	ankyrin repeat and SOCS box containing 8 [Source:HGNC Symbol;Acc:17183]	gene	overlapping	0	0.817557	1.41253	2.79026
ASCL3	9	587301	587840	+	NaN	ASCL3	ENSSSCG00000014572	Uncharacterized protein [Source:UniProtKB/TrEMBL;Acc:F1RNK0]	gene	overlapping	0	-2.99805	-2.30222	-2.64773
ASCL4	5	12409905	12410423	-	NaN	ASCL4	ENSSSCG00000000159	Uncharacterized protein [Source:UniProtKB/TrEMBL;Acc:F1SPS0]	gene	overlapping	0	-2.99805	-2.30222	-2.64773
ASF1A	1	48348376	48365616	-	NaN	MCM9	ENSSSCG00000004246	Uncharacterized protein [Source:UniProtKB/TrEMBL;Acc:F1SF38]	gene	overlapping	0	3.62087	3.66013	5.3954
ASGR2	12	54769355	54787841	-	NaN	ASGR2	ENSSSCG00000017932	Uncharacterized protein [Source:UniProtKB/TrEMBL;Acc:F1RF46]	gene	overlapping	0	-1.61405	-2.30222	-1.32795
ASH1L	4	103140714	103276718	+	NaN	ASH1L	ENSSSCG00000006508	Uncharacterized protein [Source:UniProtKB/TrEMBL;Acc:F1RLM3]	gene	overlapping	0	4.76731	4.7273	5.13671
ASIC1	5	16385812	16388515	+	NaN	ASIC1	ENSSSCG00000027522	acid-sensing (proton-gated) ion channel 1 [Source:HGNC Symbol;Acc:100]	gene	overlapping	0	-2.99805	-2.30222	-2.64773
ASIC3	18	6542444	6546340	-	NaN	ASIC3	ENSSSCG00000027024	acid-sensing (proton-gated) ion channel 3 [Source:HGNC Symbol;Acc:101]	gene	overlapping	0	-2.99805	-2.25156	-2.64773
ASIC4	15	134594938	134619791	-	NaN	ASIC4	ENSSSCG00000029968	acid-sensing (proton-gated) ion channel family member 4 [Source:HGNC Symbol;Acc:21263]	gene	overlapping	0	-2.99805	-2.30222	-2.64773
ASIP_PIG	17	42602601	42686658	+	NaN	ASIP	ENSSSCG00000007277	Agouti-signaling protein [Source:UniProtKB/Swiss-Prot;Acc:Q6ZYM3]	gene	overlapping	0	-2.99805	-2.30222	-2.64773
ASNA1	2	66630070	66641614	-	NaN	ASNA1	ENSSSCG00000013728	Uncharacterized protein [Source:UniProtKB/TrEMBL;Acc:F2Z5J4]	gene	overlapping	0	4.60762	4.33987	3.94331
ASPH	4	78382682	78507425	+	NaN	ASPH	ENSSSCG00000025087	Uncharacterized protein [Source:UniProtKB/TrEMBL;Acc:F1RT90]	gene	overlapping	0	0.146379	1.24308	2.04412
ASPHD1	3	18633621	18636930	-	NaN	ASPHD1	ENSSSCG00000026860	aspartate beta-hydroxylase domain containing 1 [Source:HGNC Symbol;Acc:27380]	gene	overlapping	0	-2.99805	-2.30222	-2.64773
ASPHD2	14	46910253	46924926	+	NaN	ASPHD2	ENSSSCG00000009959	Uncharacterized protein [Source:UniProtKB/TrEMBL;Acc:F1RG81]	gene	overlapping	0	-2.99805	-2.30222	-2.64773
ASPM	10	24612857	24657406	-	NaN	ASPM	ENSSSCG00000010896	Abnormal spindle-like microcephaly-associated protein [Source:UniProtKB/TrEMBL;Acc:Q6ULQ9]	gene	overlapping	0	3.38207	4.3782	4.71299
ASRGL1	2	8649633	8675487	-	NaN	ASRGL1	ENSSSCG00000013065	Uncharacterized protein [Source:UniProtKB/TrEMBL;Acc:F1RPW8]	gene	overlapping	0	5.04387	4.77242	4.2633
ASS1	1	304454129	304508998	+	NaN	ASS1	ENSSSCG00000005701	Uncharacterized protein [Source:UniProtKB/TrEMBL;Acc:F1S0X9]	gene	overlapping	0	6.97038	6.16336	7.30406
ASTE1	13	1092991	1107177	+	NaN	ASTE1	ENSSSCG00000011182	Uncharacterized protein [Source:UniProtKB/TrEMBL;Acc:F1RSA3]	gene	overlapping	0	0.30696	-0.157794	-2.01808
ASTER_PIG	2	66692076	66705756	+	NaN	C19ORF56	ENSSSCG00000013721	Protein Asterix [Source:UniProtKB/Swiss-Prot;Acc:Q6Q7K0]	gene	overlapping	0	4.26966	4.60319	4.38165
ASTL	3	49198536	49210879	+	NaN	ASTL	ENSSSCG00000008126	Uncharacterized protein [Source:UniProtKB/TrEMBL;Acc:F1SU45]	gene	overlapping	0	-2.99805	-2.25156	-2.64773
ASTN2	1	288523735	288860125	-	NaN	ASTN2	ENSSSCG00000005502	Uncharacterized protein [Source:UniProtKB/TrEMBL;Acc:F1SMI1]	gene	overlapping	0	-1.5849	-2.30222	-2.64773
ASXL1	17	40908261	40984197	+	NaN	ASXL1	ENSSSCG00000007248	Uncharacterized protein [Source:UniProtKB/TrEMBL;Acc:F1S518]	gene	overlapping	0	5.08637	4.98545	4.57286
ASXL2	3	119991708	120169493	+	NaN	KIF3C	ENSSSCG00000008574	Uncharacterized protein [Source:UniProtKB/TrEMBL;Acc:F1SDL9]	gene	overlapping	0	4.79699	4.35973	3.98697
ASXL3	6	109853532	109868912	+	NaN	ASXL3	ENSSSCG00000003736	Uncharacterized protein [Source:UniProtKB/TrEMBL;Acc:F1SAK2]	gene	overlapping	0	-2.99805	-2.30222	-2.64773
ASZ1	18	30602675	30641151	-	NaN	ASZ1	ENSSSCG00000016627	Uncharacterized protein [Source:UniProtKB/TrEMBL;Acc:F1SJD9]	gene	overlapping	0	2.8553	3.50384	4.53027
ASZ1	18	30873293	30884569	-	NaN	ASZ1	ENSSSCG00000030097	ankyrin repeat, SAM and basic leucine zipper domain containing 1 [Source:HGNC Symbol;Acc:1350]	gene	overlapping	0	2.0735	-0.181257	2.60852
AT1A1_PIG	4	114431990	114452742	-	NaN	ATP1A1	ENSSSCG00000006740	Sodium/potassium-transporting ATPase subunit alpha-1 [Source:UniProtKB/Swiss-Prot;Acc:P05024]	gene	overlapping	0	7.91923	8.09357	7.9385
AT1A2_PIG	4	98284936	98312300	-	NaN	ATP1A2	ENSSSCG00000006391	Sodium/potassium-transporting ATPase subunit alpha-2 [Source:UniProtKB/Swiss-Prot;Acc:D2WKD8]	gene	overlapping	0	-2.99805	-1.19491	-2.64773
AT1B1_PIG	4	89529321	89550560	-	NaN	ATP1B1	ENSSSCG00000006296	Sodium/potassium-transporting ATPase subunit beta-1 [Source:UniProtKB/Swiss-Prot;Acc:P05027]	gene	overlapping	0	-0.853621	0.909418	2.1429
AT1B4_PIG	X	112773872	112791611	+	NaN	ATP1B4	ENSSSCG00000012606	Protein ATP1B4 [Source:UniProtKB/Swiss-Prot;Acc:Q9BDK6]	gene	overlapping	0	-2.99805	-2.30222	-2.64773
AT2A3_PIG	12	52031785	52042206	-	NaN	ATP2A3	ENSSSCG00000017874	Sarcoplasmic/endoplasmic reticulum calcium ATPase 3 [Source:UniProtKB/Swiss-Prot;Acc:O77696]	gene	overlapping	0	-2.99805	-2.30222	-2.64773
AT2B1_PIG	5	97596830	97709794	+	NaN	ATP2B1	ENSSSCG00000027898	Plasma membrane calcium-transporting ATPase 1 [Source:UniProtKB/Swiss-Prot;Acc:P23220]	gene	overlapping	0	2.54907	2.58003	1.81056
AT5G1_PIG	12	25066819	25069489	+	NaN	ATP5G1	ENSSSCG00000017544	ATP synthase lipid-binding protein, mitochondrial [Source:UniProtKB/Swiss-Prot;Acc:A1XQS5]	gene	overlapping	0	8.08584	8.31167	8.53751
ATAD1	14	108795830	108866478	-	NaN	ATAD1	ENSSSCG00000010438	ATPase family, AAA domain containing 1 [Source:HGNC Symbol;Acc:25903]	gene	overlapping	0	5.58838	6.12375	6.47322
ATAD2	4	16755854	16823398	+	NaN	ATAD2	ENSSSCG00000005983	Uncharacterized protein [Source:UniProtKB/TrEMBL;Acc:F1RR16]	gene	overlapping	0	5.79929	5.25373	6.29395
ATAT_PIG	7	26895077	26907386	+	NaN	ATAT1	ENSSSCG00000024604	Alpha-tubulin N-acetyltransferase [Source:UniProtKB/Swiss-Prot;Acc:Q767K7]	gene	overlapping	0	-0.520288	-0.736782	-2.06874
ATCAY	2	75342964	75381642	-	NaN	ATCAY	ENSSSCG00000026754	ataxia, cerebellar, Cayman type [Source:HGNC Symbol;Acc:779]	gene	overlapping	0	0.53038	1.17554	-0.2441
ATE1	14	142698096	142860718	-	NaN	ATE1	ENSSSCG00000010699	Arginyl-tRNA--protein transferase 1 [Source:UniProtKB/TrEMBL;Acc:F1SEH8]	gene	overlapping	0	2.55471	2.23409	1.84506
ATF1	5	17196932	17198642	+	NaN	ATF1	ENSSSCG00000020867	activating transcription factor 1 [Source:HGNC Symbol;Acc:783]	gene	overlapping	0	-2.03506	-1.14425	-1.43909
ATF2	15	90260304	90303432	-	NaN	ATF2	ENSSSCG00000015972	Uncharacterized protein [Source:UniProtKB/TrEMBL;Acc:F1RZI1]	gene	overlapping	0	1.67135	1.98269	1.10024
ATF3	9	143690514	143703906	+	NaN	ATF3	ENSSSCG00000015595	Uncharacterized protein [Source:UniProtKB/TrEMBL;Acc:F1S2W1]	gene	overlapping	0	3.92728	3.99924	3.87579
ATF5	6	50728147	50731295	+	NaN	ATF5	ENSSSCG00000003201	Uncharacterized protein [Source:UniProtKB/TrEMBL;Acc:F1RH58]	gene	overlapping	0	0.230225	1.04602	0.30171
ATF6	4	96537111	96820806	-	NaN	ATF6	ENSSSCG00000006346	Activating transcription factor 6 [Source:UniProtKB/TrEMBL;Acc:C8ZL57]	gene	overlapping	0	3.39715	3.95816	3.44553
ATF7	5	19169483	19285220	-	NaN	ATF7	ENSSSCG00000000278	Uncharacterized protein [Source:UniProtKB/TrEMBL;Acc:F1SFP0]	gene	overlapping	0	3.44436	2.53979	1.67221
ATF7IP	5	61444247	61571485	-	NaN	ATF7IP	ENSSSCG00000000612	Uncharacterized protein [Source:UniProtKB/TrEMBL;Acc:F1SQ86]	gene	overlapping	0	6.00126	5.66621	6.0268
ATF7IP2	3	33325594	33378470	-	NaN	ATF7IP2	ENSSSCG00000020675	activating transcription factor 7 interacting protein 2 [Source:HGNC Symbol;Acc:20397]	gene	overlapping	0	-0.127775	1.37053	2.06219
ATG13	2	17207852	17266771	-	NaN	ATG13	ENSSSCG00000013257	ATG13 autophagy related 13 homolog (S. cerevisiae) [Source:HGNC Symbol;Acc:29091]	gene	overlapping	0	4.92244	4.07486	3.99374
ATG14	1	205253657	205293961	-	NaN	ATG14	ENSSSCG00000005058	Uncharacterized protein [Source:UniProtKB/TrEMBL;Acc:F1SSN7]	gene	overlapping	0	0.110741	1.10141	0.163364
ATG16L2	9	8108620	8122236	+	NaN	ATG16L2	ENSSSCG00000014819	Uncharacterized protein [Source:UniProtKB/TrEMBL;Acc:F1SUV0]	gene	overlapping	0	-2.99805	-1.91822	-2.64773
ATG3	13	156876874	156907029	+	NaN	ATG3	ENSSSCG00000011930	Autophagy-related protein 3 [Source:UniProtKB/TrEMBL;Acc:F1SLS7]	gene	overlapping	0	5.10816	4.7688	5.83978
ATG4A	X	102985759	103062971	+	NaN	PSMD10	ENSSSCG00000012568	Uncharacterized protein [Source:UniProtKB/TrEMBL;Acc:F1RXI6]	gene	overlapping	0	0.0821642	1.84221	1.62638
ATG4D_PIG	2	69705972	69716920	+	NaN	ATG4D	ENSSSCG00000013645	Cysteine protease ATG4D [Source:UniProtKB/Swiss-Prot;Acc:Q684M2]	gene	overlapping	0	3.22329	2.54205	3.39552
ATHL1	2	162119619	162125406	-	NaN	ENSSSCG00000014564	ENSSSCG00000014564	Ifitm1-like protein [Source:UniProtKB/TrEMBL;Acc:A9QW81]	gene	overlapping	0	-2.41906	-2.30222	-2.64773
ATIF1_PIG	6	79045745	79047942	+	NaN	ATPIF1	ENSSSCG00000027072	ATPase inhibitor, mitochondrial [Source:UniProtKB/Swiss-Prot;Acc:Q29307]	gene	overlapping	0	7.23625	6.86548	7.12833
ATL2	3	108108201	108147738	+	NaN	ATL2	ENSSSCG00000008487	Uncharacterized protein [Source:UniProtKB/TrEMBL;Acc:F1S4R2]	gene	overlapping	0	5.75373	5.78705	6.29825
ATL3	2	7615311	7649588	+	NaN	RTN3	ENSSSCG00000013052	Uncharacterized protein [Source:UniProtKB/TrEMBL;Acc:F1RPY3]	gene	overlapping	0	4.5262	3.68538	4.31651
ATM_PIG	9	40746503	40833540	-	NaN	ATM	ENSSSCG00000025606	Serine-protein kinase ATM [Source:UniProtKB/Swiss-Prot;Acc:Q6PQD5]	gene	overlapping	0	3.91097	4.07946	4.25531
ATOH1	8	135104480	135105541	-	NaN	ATOH1	ENSSSCG00000009196	Uncharacterized protein [Source:UniProtKB/TrEMBL;Acc:F1RWW1]	gene	overlapping	0	-2.99805	-2.30222	-2.64773
ATOH7	14	77411094	77411561	-	NaN	ATOH7	ENSSSCG00000021995	atonal homolog 7 (Drosophila) [Source:HGNC Symbol;Acc:13907]	gene	overlapping	0	-2.99805	-2.30222	-2.64773
ATOH8	3	62024701	62035682	+	NaN	ATOH8	ENSSSCG00000008230	Uncharacterized protein [Source:UniProtKB/TrEMBL;Acc:F1SVB9]	gene	overlapping	0	-2.99805	-2.30222	-2.64773
ATP10A	1	157470911	157522115	+	NaN	ATP10A	ENSSSCG00000004830	Uncharacterized protein [Source:UniProtKB/TrEMBL;Acc:F1SNS2]	gene	overlapping	0	-2.94738	-2.30222	-2.64773
ATP10B	16	68217650	68219989	-	NaN	ATP10B	ENSSSCG00000017030	ATPase, class V, type 10B [Source:HGNC Symbol;Acc:13543]	gene	overlapping	0	-2.99805	-2.30222	-2.64773
ATP10D	8	39364010	39503097	+	NaN	ATP10D	ENSSSCG00000008812	ATPase, class V, type 10D [Source:HGNC Symbol;Acc:13549]	gene	overlapping	0	1.04653	0.955584	0.340203
ATP11B	2	56336982	56340416	+	NaN	ATP11B	ENSSSCG00000027225	ATPase, class VI, type 11B [Source:HGNC Symbol;Acc:13553]	gene	overlapping	0	2.09188	1.45437	1.95569
ATP11C	X	130614127	130769626	-	NaN	ATP11C	ENSSSCG00000012713	Uncharacterized protein [Source:UniProtKB/TrEMBL;Acc:F1RQ73]	gene	overlapping	0	4.61675	4.9448	4.95166
ATP13A1	2	58410628	58427819	-	NaN	ATP13A1	ENSSSCG00000013930	Uncharacterized protein [Source:UniProtKB/TrEMBL;Acc:F1S7C4]	gene	overlapping	0	3.16529	2.96786	2.45485
ATP13A2	6	69931621	69951914	-	NaN	ATP13A2	ENSSSCG00000025105	Uncharacterized protein [Source:UniProtKB/TrEMBL;Acc:F1SUR9]	gene	overlapping	0	-0.520287	-0.0612916	-2.59706
ATP13A3	13	140888272	141023097	-	NaN	ATP13A3	ENSSSCG00000011825	Uncharacterized protein [Source:UniProtKB/TrEMBL;Acc:F1SFG4]	gene	overlapping	0	6.12974	5.74924	7.47554
ATP13A5	13	139829967	139925608	-	NaN	ATP13A5	ENSSSCG00000026260	ATPase type 13A5 [Source:HGNC Symbol;Acc:31789]	gene	overlapping	0	-2.99805	-2.30222	-2.64773
ATP1A4	4	98232795	98273614	-	NaN	ATP1A4	ENSSSCG00000020953	ATPase, Na+/K+ transporting, alpha 4 polypeptide [Source:HGNC Symbol;Acc:14073]	gene	overlapping	0	-2.99805	-2.30222	-2.64773
ATP1B2	12	55243290	55248008	-	NaN	ATP1B2	ENSSSCG00000017951	Uncharacterized protein [Source:UniProtKB/TrEMBL;Acc:F1ST41]	gene	overlapping	0	-2.99805	-2.30222	-2.64773
ATP2B1	5	97776303	97793667	-	NaN	ATP2B1	ENSSSCG00000000921	Plasma membrane calcium-transporting ATPase 1 [Source:UniProtKB/TrEMBL;Acc:F1SPZ5]	gene	overlapping	0	2.39015	3.40983	3.18659
ATP2B2	13	73576875	73673698	-	NaN	ATP2B2	ENSSSCG00000023084	Uncharacterized protein [Source:UniProtKB/TrEMBL;Acc:F1SQB0]	gene	overlapping	0	-2.99805	-2.30222	-2.64773
ATP2B3	X	141883505	141921127	+	NaN	ATP2B3	ENSSSCG00000012769	Uncharacterized protein [Source:UniProtKB/TrEMBL;Acc:F1S2B3]	gene	overlapping	0	-1.89074	-1.19491	-2.26373
ATP2C1	13	1117616	1237435	-	NaN	ATP2C1	ENSSSCG00000011183	Uncharacterized protein [Source:UniProtKB/TrEMBL;Acc:F1RSA2]	gene	overlapping	0	4.782	4.93961	5.06239
ATP2C2	6	4664857	4737861	-	NaN	ATP2C2	ENSSSCG00000002671	Uncharacterized protein [Source:UniProtKB/TrEMBL;Acc:F1S5U9]	gene	overlapping	0	-0.889259	0.226207	-2.59706
ATP4A	6	40385885	40391977	+	NaN	ATP4A	ENSSSCG00000021139	ATPase, H+/K+ exchanging, alpha polypeptide [Source:HGNC Symbol;Acc:819]	gene	overlapping	0	-2.94738	-2.30222	-2.64773
ATP4A_PIG	6	40444520	40454205	-	NaN	ATP4A	ENSSSCG00000002902	Potassium-transporting ATPase alpha chain 1 [Source:UniProtKB/Swiss-Prot;Acc:P19156]	gene	overlapping	0	-2.99805	-2.30222	-2.64773
ATP4B_PIG	11	86513343	86518449	-	NaN	ATP4B	ENSSSCG00000009561	Potassium-transporting ATPase subunit beta [Source:UniProtKB/Swiss-Prot;Acc:P18434]	gene	overlapping	0	-2.99805	-2.30222	-2.59706
ATP5B	5	23659084	23666696	-	NaN	ATP5B	ENSSSCG00000000405	ATP synthase subunit beta [Source:UniProtKB/TrEMBL;Acc:F1SLA0]	gene	overlapping	0	8.74804	9.17701	9.2186
ATP5F1	4	119078679	119090067	-	NaN	ATP5F1	ENSSSCG00000006789	Uncharacterized protein [Source:UniProtKB/TrEMBL;Acc:F1SBN7]	gene	overlapping	0	6.68243	6.40284	7.30071
ATP5G2	5	19267782	19272713	+	NaN	ATF7	ENSSSCG00000000278	Uncharacterized protein [Source:UniProtKB/TrEMBL;Acc:F1SFP0]	gene	overlapping	0	-2.99805	-2.30222	-2.64773
ATP5G2	5	19410800	19415732	+	NaN	ATP5G2	ENSSSCG00000029673	Mitochondrial ATP5G2 [Source:UniProtKB/TrEMBL;Acc:A1XQS9]	gene	overlapping	0	-0.520287	-0.47758	-1.77242
ATP5G3	15	90317366	90321215	-	NaN	ATP5G3	ENSSSCG00000015973	Uncharacterized protein [Source:UniProtKB/TrEMBL;Acc:F1RZI0]	gene	overlapping	0	7.87716	8.25291	9.44778
ATP5H	12	6320506	6321529	+	NaN	ATP5H	ENSSSCG00000025104	ATP synthase, H+ transporting, mitochondrial Fo complex, subunit d [Source:HGNC Symbol;Acc:845]	gene	overlapping	0	4.46064	4.23218	4.72721
ATP5I	8	83833749	83833919	+	NaN	ATP5I	ENSSSCG00000009024	ATP synthase subunit e, mitochondrial [Source:UniProtKB/TrEMBL;Acc:F1RS87]	gene	overlapping	0	-2.99805	-2.30222	-2.64773
ATP5I_PIG	8	149901	151754	-	NaN	ATP5I	ENSSSCG00000023903	ATP synthase subunit e, mitochondrial [Source:UniProtKB/Swiss-Prot;Acc:Q9MYT8]	gene	overlapping	0	6.04783	6.32556	7.17787
ATP5J_PIG	13	199152403	199157934	-	NaN	JAM2	ENSSSCG00000023028	junctional adhesion molecule 2 [Source:HGNC Symbol;Acc:14686]	gene	overlapping	0	7.1834	7.56227	7.82503
ATP5S	1	200410387	200424733	+	NaN	ATP5S	ENSSSCG00000005017	Uncharacterized protein [Source:UniProtKB/TrEMBL;Acc:F1SHX8]	gene	overlapping	0	1.6529	1.74804	1.69272
ATP5SL	6	45224686	45228732	+	NaN	B9D2	ENSSSCG00000003013	Uncharacterized protein [Source:UniProtKB/TrEMBL;Acc:F1RH86]	gene	overlapping	0	0.53038	0.0595652	-0.235276
ATP5SL	6	45296654	45300701	-	NaN	ATP5SL	ENSSSCG00000021603	Uncharacterized protein [Source:UniProtKB/TrEMBL;Acc:F1RH89]	gene	overlapping	0	-2.99805	-2.30222	-2.64773
ATP6_PIG	MT	7944	8624	+	NaN	MT-ATP8	ENSSSCG00000018080	ATP synthase protein 8 [Source:UniProtKB/Swiss-Prot;Acc:Q35914]	gene	overlapping	0	11.7177	11.3368	12.354
ATP6AP1L	2	92702700	92719774	+	NaN	ATP6AP1L	ENSSSCG00000014132	Uncharacterized protein [Source:UniProtKB/TrEMBL;Acc:F1RF04]	gene	overlapping	0	-0.25008	-0.288566	-1.43909
ATP6AP2	X	40375619	40398502	+	NaN	ATP6AP2	ENSSSCG00000012247	Uncharacterized protein [Source:UniProtKB/TrEMBL;Acc:F1RXN8]	gene	overlapping	0	7.22866	7.30273	7.18446
ATP6V0A2	14	30942707	30990011	-	NaN	ATP6V0A2	ENSSSCG00000009766	Uncharacterized protein [Source:UniProtKB/TrEMBL;Acc:F1RFL9]	gene	overlapping	0	3.62601	3.54136	2.93413
ATP6V0A4	18	11364240	11430517	+	NaN	ATP6V0A4	ENSSSCG00000016516	ATPase, H+ transporting, lysosomal V0 subunit a4 [Source:HGNC Symbol;Acc:866]	gene	overlapping	0	6.87527	6.15523	6.54542
ATP6V0C	3	42700754	42706839	+	NaN	ATP6V0C	ENSSSCG00000008056	Uncharacterized protein [Source:UniProtKB/TrEMBL;Acc:F1SUH8]	gene	overlapping	0	9.19191	9.0571	8.66577
ATP6V0D1	6	25355171	25399156	-	NaN	HSD11B2	ENSSSCG00000002777	corticosteroid 11-beta-dehydrogenase isozyme 2 [Source:RefSeq peptide;Acc:NP_999078]	gene	overlapping	0	5.67642	5.73516	4.41577
ATP6V0D2	4	55660235	55715444	-	NaN	ATP6V0D2	ENSSSCG00000006138	Uncharacterized protein [Source:UniProtKB/TrEMBL;Acc:F1RXD2]	gene	overlapping	0	6.49497	4.96453	7.14693
ATP6V1B1	3	75019946	75029803	+	NaN	ATP6V1B1	ENSSSCG00000008314	Uncharacterized protein [Source:UniProtKB/TrEMBL;Acc:F1SLE5]	gene	overlapping	0	-2.89672	-2.30222	-0.836636
ATP6V1B2	14	4323926	4353798	+	NaN	ATP6V1B2	ENSSSCG00000028694	Uncharacterized protein [Source:UniProtKB/TrEMBL;Acc:F1RMZ8]	gene	overlapping	0	-2.99805	-0.93177	-2.64773
ATP6V1B2	14	4718535	4748277	-	NaN	ATP6V1B2	ENSSSCG00000009602	Uncharacterized protein [Source:UniProtKB/TrEMBL;Acc:F1RMZ8]	gene	overlapping	0	-2.61405	-2.30222	-2.59706
ATP6V1C2	3	134531063	134581048	+	NaN	ATP6V1C2	ENSSSCG00000008634	Uncharacterized protein [Source:UniProtKB/TrEMBL;Acc:F1SAA2]	gene	overlapping	0	5.75374	6.06728	4.94793
ATP6V1D	7	97373941	97394481	-	NaN	ATP6V1D	ENSSSCG00000002288	Uncharacterized protein [Source:UniProtKB/TrEMBL;Acc:F1SA40]	gene	overlapping	0	4.57339	5.53842	5.1511
ATP6V1E1	5	72025379	72045323	-	NaN	ATP6V1E1	ENSSSCG00000000767	Uncharacterized protein [Source:UniProtKB/TrEMBL;Acc:F1SHR3]	gene	overlapping	0	7.21758	6.69178	7.02287
ATP6V1E2	3	100117152	100117832	+	NaN	ATP6V1E2	ENSSSCG00000008441	Uncharacterized protein [Source:UniProtKB/TrEMBL;Acc:F1S5M0]	gene	overlapping	0	-2.99805	-2.30222	-2.64773
ATP6V1F	18	20885995	20889206	+	NaN	ATP6V1F	ENSSSCG00000016577	ATPase, H+ transporting, lysosomal 14kDa, V1 subunit F [Source:HGNC Symbol;Acc:16832]	gene	overlapping	0	4.50495	4.27637	4.47943
ATP6V1G1	7	20422119	20422475	-	NaN	MRS2	ENSSSCG00000001087	Uncharacterized protein [Source:UniProtKB/TrEMBL;Acc:F1RUF2]	gene	overlapping	0	-2.99805	-2.25156	-2.26373
ATP6V1G3	10	26048270	26071954	-	NaN	ATP6V1G3	ENSSSCG00000010905	Uncharacterized protein [Source:UniProtKB/TrEMBL;Acc:F1S5F3]	gene	overlapping	0	8.38044	7.38941	7.73747
ATP6V1H	4	84281794	84340043	+	NaN	ATP6V1H	ENSSSCG00000006263	V-type proton ATPase subunit H [Source:UniProtKB/Swiss-Prot;Acc:Q9TVC1]	gene	overlapping	0	5.18414	4.76399	4.61031
ATP7A	X	70943092	71025573	+	NaN	ATP7A	ENSSSCG00000012437	Uncharacterized protein [Source:UniProtKB/TrEMBL;Acc:F1RPH4]	gene	overlapping	0	3.29593	4.10202	4.35392
ATP8_PIG	MT	7783	7986	+	NaN	MT-ATP8	ENSSSCG00000018080	ATP synthase protein 8 [Source:UniProtKB/Swiss-Prot;Acc:Q35914]	gene	overlapping	0	11.925	11.8421	12.4407
ATP8A1	8	35180992	35309867	-	NaN	ATP8A1	ENSSSCG00000008803	Uncharacterized protein [Source:UniProtKB/TrEMBL;Acc:F1S3T6]	gene	overlapping	0	5.23448	6.19168	4.44551
ATP8B2	4	104341877	104361697	+	NaN	ATP8B2	ENSSSCG00000006550	Uncharacterized protein [Source:UniProtKB/TrEMBL;Acc:F1RGL1]	gene	overlapping	0	1.38772	1.20872	1.34676
ATP8B3	2	77403296	77424232	-	NaN	ATP8B3	ENSSSCG00000013440	Uncharacterized protein [Source:UniProtKB/TrEMBL;Acc:F1SDH8]	gene	overlapping	0	-1.43953	-1.47758	-2.64773
ATP8B4	1	135295131	135636501	+	NaN	ATP8B4	ENSSSCG00000004646	ATPase, class I, type 8B, member 4 [Source:HGNC Symbol;Acc:13536]	gene	overlapping	0	-2.41906	-2.30222	-2.64773
ATP9B	1	161579993	161793051	-	NaN	NFATC1	ENSSSCG00000004856	Nuclear factor of activated T-cells, cytoplasmic, calcineurin-dependent 1 [Source:UniProtKB/TrEMBL;Acc:F2Q9B2]	gene	overlapping	0	0.337535	0.416593	-2.59706
ATPAF1-AS1	6	152316205	152317444	+	NaN	KIAA0494	ENSSSCG00000003895	KIAA0494 [Source:HGNC Symbol;Acc:29051]	gene	overlapping	0	-2.99805	-2.30222	-2.64773
ATPBD4	1	151769327	151805705	-	NaN	ATPBD4	ENSSSCG00000030384	ATP binding domain 4 [Source:HGNC Symbol;Acc:30543]	gene	overlapping	0	-2.0116	-0.810913	-0.546397
ATPD_PIG	2	77782631	77784866	+	NaN	ATP5D	ENSSSCG00000013431	ATP synthase subunit delta, mitochondrial [Source:UniProtKB/Swiss-Prot;Acc:Q95312]	gene	overlapping	0	3.99277	4.37547	4.49327
ATPK_PIG	3	6493037	6494591	+	NaN	ATP5J2	ENSSSCG00000029171	ATP synthase subunit f, mitochondrial [Source:UniProtKB/Swiss-Prot;Acc:Q95339]	gene	overlapping	0	-2.99805	-2.30222	-2.64773
ATPO_PIG	13	207336286	207346588	-	NaN	ATP5O	ENSSSCG00000012042	ATP synthase subunit O, mitochondrial [Source:UniProtKB/Swiss-Prot;Acc:Q2EN81]	gene	overlapping	0	6.74903	6.6385	7.36293
ATR	13	90978674	91093949	-	NaN	ATR	ENSSSCG00000011679	Uncharacterized protein [Source:UniProtKB/TrEMBL;Acc:F1SKG2]	gene	overlapping	0	5.15327	4.34064	4.64754
ATRIP	13	34424259	34430214	+	NaN	ATRIP	ENSSSCG00000011352	Uncharacterized protein [Source:UniProtKB/TrEMBL;Acc:F1SKM4]	gene	overlapping	0	-1.78941	-1.33923	0.570828
ATRN	17	36381690	36619079	-	NaN	ATRN	ENSSSCG00000007153	Uncharacterized protein [Source:UniProtKB/TrEMBL;Acc:F1S8B6]	gene	overlapping	0	5.58602	5.762	5.91181
ATRNL1	14	136580212	136886343	+	NaN	ATRNL1	ENSSSCG00000010654	Uncharacterized protein [Source:UniProtKB/TrEMBL;Acc:F1S4U3]	gene	overlapping	0	0.711428	0.0739214	1.36404
ATRX	X	70165759	70173292	+	NaN	ATRX	ENSSSCG00000021054	alpha thalassemia/mental retardation syndrome X-linked [Source:HGNC Symbol;Acc:886]	gene	overlapping	0	-2.99805	-2.30222	-2.64773
ATRX	X	70617251	70625651	+	NaN	ENSSSCG00000012434	ENSSSCG00000012434	No description	gene	overlapping	0	-2.99805	-2.30222	-2.64773
ATXN1	7	12903590	12921730	-	NaN	ATXN1	ENSSSCG00000001065	Uncharacterized protein [Source:UniProtKB/TrEMBL;Acc:F1RUJ3]	gene	overlapping	0	-2.99805	-2.30222	-2.64773
ATXN1L	6	14288918	14290905	-	NaN	ATXN1L	ENSSSCG00000002742	Uncharacterized protein [Source:UniProtKB/TrEMBL;Acc:F1S3C5]	gene	overlapping	0	-1.50674	-0.565258	-1.43909
ATXN2	14	34660727	34767837	-	NaN	ATXN2	ENSSSCG00000009834	Uncharacterized protein [Source:UniProtKB/TrEMBL;Acc:F1RMZ0]	gene	overlapping	0	7.28375	6.55223	6.44822
ATXN2L	3	18691930	18703400	+	NaN	ATXN2L	ENSSSCG00000021845	ataxin 2-like [Source:HGNC Symbol;Acc:31326]	gene	overlapping	0	6.2594	5.43633	5.69447
ATXN7	13	49908408	49965712	-	NaN	ATXN7	ENSSSCG00000011493	Uncharacterized protein [Source:UniProtKB/TrEMBL;Acc:F1SGF2]	gene	overlapping	0	3.55147	3.93714	3.82237
ATXN7L1	9	116235435	116504793	-	NaN	ATXN7L1	ENSSSCG00000015432	ataxin 7-like 1 [Source:HGNC Symbol;Acc:22210]	gene	overlapping	0	-0.176758	0.949516	2.99271
ATXN7L2	4	121095515	121104514	-	NaN	ATXN7L2	ENSSSCG00000006828	Uncharacterized protein [Source:UniProtKB/TrEMBL;Acc:F1S5Z9]	gene	overlapping	0	-2.99805	-1.47758	-1.87973
ATXN7L3	12	19330718	19336435	-	NaN	ATXN7L3	ENSSSCG00000017362	Uncharacterized protein [Source:UniProtKB/TrEMBL;Acc:F1RQY2]	gene	overlapping	0	3.55933	1.07037	-0.503302
ATXN7L3B	5	41332680	41333398	+	NaN	ATXN7L3B	ENSSSCG00000023711	ataxin 7-like 3B [Source:HGNC Symbol;Acc:37931]	gene	overlapping	0	-0.383662	-0.403449	0.560913
AUP1	3	71690828	71850899	+	NaN	AUP1	ENSSSCG00000008268	Uncharacterized protein [Source:UniProtKB/TrEMBL;Acc:F1SNV5]	gene	overlapping	0	3.31421	2.90051	3.64462
AURKA_PIG	17	64066444	64079970	-	NaN	AURKA	ENSSSCG00000007493	Aurora kinase A [Source:UniProtKB/Swiss-Prot;Acc:A5GFW1]	gene	overlapping	0	4.45219	4.59442	4.91237
AURKB_PIG	12	55886067	55890688	-	NaN	AURKB	ENSSSCG00000028924	Aurora kinase B [Source:UniProtKB/Swiss-Prot;Acc:Q9N0X0]	gene	overlapping	0	-1.17341	1.66771	1.61922
AUTS2	3	14855655	14946253	+	NaN	AUTS2	ENSSSCG00000007727	Autism susceptibility gene 2 [Source:UniProtKB/TrEMBL;Acc:F7IY48]	gene	overlapping	0	1.48875	0.573088	0.961457
AVEN	7	86440825	86475461	+	NaN	AVEN	ENSSSCG00000002247	Uncharacterized protein [Source:UniProtKB/TrEMBL;Acc:F1SCK4]	gene	overlapping	0	-2.61405	-2.30222	-2.06874
AVL9	18	44753174	44812374	+	NaN	AVL9	ENSSSCG00000023445	AVL9 homolog (S. cerevisiase) [Source:HGNC Symbol;Acc:28994]	gene	overlapping	0	3.42661	2.83777	2.49955
AVPI1	14	118548268	118556353	-	NaN	AVPI1	ENSSSCG00000010526	Uncharacterized protein [Source:UniProtKB/TrEMBL;Acc:F1S8X6]	gene	overlapping	0	4.06643	2.99222	3.48357
AVPR1A	5	30643445	30647686	-	NaN	AVPR1A	ENSSSCG00000021070	Uncharacterized protein [Source:UniProtKB/TrEMBL;Acc:F1SKD2]	gene	overlapping	0	-2.99805	-2.30222	-2.64773
AVPR1A	5	30775625	30779866	-	NaN	AVPR1A	ENSSSCG00000024879	Uncharacterized protein [Source:UniProtKB/TrEMBL;Acc:F1SKD2]	gene	overlapping	0	-2.99805	-2.30222	-2.64773
AVPR1B	9	73020218	73023991	-	NaN	AVPR1B	ENSSSCG00000015639	Uncharacterized protein [Source:UniProtKB/TrEMBL;Acc:F1SF06]	gene	overlapping	0	-2.99805	-2.30222	-2.64773
AVR2B_PIG	13	25422228	25450732	+	NaN	ACVR2B	ENSSSCG00000011257	Activin receptor type-2B [Source:UniProtKB/Swiss-Prot;Acc:Q66T47]	gene	overlapping	0	0.307096	1.22189	-0.331778
AWAT2	X	63301798	63302376	-	NaN	AWAT2	ENSSSCG00000012384	acyl-CoA wax alcohol acyltransferase 2 [Source:HGNC Symbol;Acc:23251]	gene	overlapping	0	-2.99805	-2.30222	-2.64773
AWN_PIG	6	43712439	43713801	-	NaN	AWN	ENSSSCG00000002980	Carbohydrate-binding protein AWN [Source:UniProtKB/Swiss-Prot;Acc:P26776]	gene	overlapping	0	-2.99805	-2.30222	-2.64773
AXDND1	9	132843494	132869365	-	NaN	AXDND1	ENSSSCG00000015528	axonemal dynein light chain domain containing 1 [Source:HGNC Symbol;Acc:26564]	gene	overlapping	0	-2.99805	-2.25156	-2.64773
AXIN1	3	41033945	41079796	-	NaN	AXIN1	ENSSSCG00000023204	axin 1 [Source:HGNC Symbol;Acc:903]	gene	overlapping	0	-0.65106	0.226207	0.970519
AXIN2	12	12660556	12661377	-	NaN	AXIN2	ENSSSCG00000017265	axin 2 [Source:HGNC Symbol;Acc:904]	gene	overlapping	0	-2.08573	-0.352781	-0.0491123
AXL	6	44980555	44989676	-	NaN	AXL	ENSSSCG00000003005	AXL receptor tyrosine kinase [Source:UniProtKB/TrEMBL;Acc:Q6JTJ1]	gene	overlapping	0	-2.99805	-2.30222	-2.64773
AZGP1	3	7122226	7129391	+	NaN	AZGP1	ENSSSCG00000007642	Uncharacterized protein [Source:UniProtKB/TrEMBL;Acc:F1RNP2]	gene	overlapping	0	-2.99805	-2.30222	-2.64773
AZI1	12	1446018	1462501	+	NaN	AZI1	ENSSSCG00000017143	Uncharacterized protein [Source:UniProtKB/TrEMBL;Acc:F1RZA9]	gene	overlapping	0	0.958143	0.669453	-0.503302
AZI2	13	16453920	16535156	-	NaN	AZI2	ENSSSCG00000028258	Uncharacterized protein [Source:UniProtKB/TrEMBL;Acc:F1RRG1]	gene	overlapping	0	3.55245	3.58016	4.11379
B2CL1_PIG	17	40303941	40304555	-	NaN	BCL2L1	ENSSSCG00000007229	Bcl-2-like protein 1 [Source:UniProtKB/Swiss-Prot;Acc:O77737]	gene	overlapping	0	1.69433	1.50887	-0.2441
B2MG_PIG	1	141436332	141517774	-	NaN	B2M	ENSSSCG00000004687	Beta-2-microglobulin [Source:UniProtKB/Swiss-Prot;Acc:Q07717]	gene	overlapping	0	-2.08573	-1.3899	-2.64773
B2MG_PIG	1	141532505	141538781	-	NaN	B2M	ENSSSCG00000004682	Beta-2-microglobulin [Source:UniProtKB/Swiss-Prot;Acc:Q07717]	gene	overlapping	0	-0.298095	0.529053	-2.01808
B3GALNT2	14	59874800	59894035	+	NaN	B3GALNT2	ENSSSCG00000010153	Uncharacterized protein [Source:UniProtKB/TrEMBL;Acc:F1RGY0]	gene	overlapping	0	-2.41906	-1.72323	0.12027
B3GALT1	15	83303790	83304770	+	NaN	B3GALT1	ENSSSCG00000015918	Uncharacterized protein [Source:UniProtKB/TrEMBL;Acc:F1S1X0]	gene	overlapping	0	-2.99805	-2.30222	-2.64773
B3GALT2	10	2306958	2308226	-	NaN	B3GALT2	ENSSSCG00000010800	Uncharacterized protein [Source:UniProtKB/TrEMBL;Acc:F1SAB1]	gene	overlapping	0	-2.99805	-2.30222	-0.87973
B3GALT4	7	34146955	34148615	+	NaN	B3GALT4	ENSSSCG00000001503	Uncharacterized protein [Source:UniProtKB/TrEMBL;Acc:F1RZT4]	gene	overlapping	0	0.0412118	-1.53422	-2.64773
B3GALT5	13	213581135	213582070	-	NaN	B3GALT5	ENSSSCG00000012070	Uncharacterized protein [Source:UniProtKB/TrEMBL;Acc:F1SGT9]	gene	overlapping	0	-2.99805	-2.30222	-2.64773
B3GALT6	6	57997153	57998124	-	NaN	B3GALT6	ENSSSCG00000022151	UDP-Gal:betaGal beta 1,3-galactosyltransferase polypeptide 6 [Source:HGNC Symbol;Acc:17978]	gene	overlapping	0	-2.99805	-2.30222	-2.64773
B3GALTL	11	7775851	7875184	+	NaN	B3GALTL	ENSSSCG00000009335	Uncharacterized protein [Source:UniProtKB/TrEMBL;Acc:F1RSS9]	gene	overlapping	0	1.06552	1.07037	-0.737642
B3GAT1	9	67615945	67639777	-	NaN	B3GAT1	ENSSSCG00000015259	Uncharacterized protein [Source:UniProtKB/TrEMBL;Acc:F1S6C4]	gene	overlapping	0	-2.99805	-2.25156	-2.64773
B3GAT2	1	57276096	57378530	-	NaN	SMAP1	ENSSSCG00000004276	Uncharacterized protein [Source:UniProtKB/TrEMBL;Acc:F1RTT0]	gene	overlapping	0	4.15216	4.56477	4.49307
B3GAT3	2	8465235	8470728	+	NaN	B3GAT3	ENSSSCG00000020809	3-beta-glucuronosyltransferase [Source:UniProtKB/TrEMBL;Acc:Q7YRG4]	gene	overlapping	0	-1.67826	-2.20089	-1.73541
B3GL1_PIG	13	109170833	109175561	-	NaN	B3GALNT1	ENSSSCG00000021774ion=UDP-GalNAc:beta-1,3-N-acetylgalactosaminyltransferase1 [Source:UniProtKB/Swiss-Prot;Acc:Q864U6]	No description	gene	overlapping	0	3.22214	3.05463	4.39634
B3GN5_PIG	13	130478533	130494818	-	NaN	B3GNT5	ENSSSCG00000024393	UDP-GlcNAc:betaGal beta-1,3-N-acetylglucosaminyltransferase 5 [Source:UniProtKB/Swiss-Prot;Acc:Q864U8]	gene	overlapping	0	3.08931	3.94325	3.37648
B3GNT1	2	5120057	5122388	+	NaN	B3GNT1	ENSSSCG00000012940	Uncharacterized protein [Source:UniProtKB/TrEMBL;Acc:F1RUS9]	gene	overlapping	0	0.12889	1.36186	1.67568
B3GNT3	2	59504347	59522322	-	NaN	B3GNT3	ENSSSCG00000013886	Uncharacterized protein [Source:UniProtKB/TrEMBL;Acc:F1S937]	gene	overlapping	0	5.14041	5.05564	4.24903
B3GNT4	14	32089972	32092035	+	NaN	B3GNT4	ENSSSCG00000009798	Uncharacterized protein [Source:UniProtKB/TrEMBL;Acc:F1RNS3]	gene	overlapping	0	-2.03506	-2.30222	-2.64773
B3GNT6	9	12270372	12271511	+	NaN	B3GNT6	ENSSSCG00000014874	Uncharacterized protein [Source:UniProtKB/TrEMBL;Acc:F1SUK7]	gene	overlapping	0	-2.99805	-2.30222	-2.64773
B3GNT7	15	145844118	145845326	+	NaN	B3GNT7	ENSSSCG00000020897	Uncharacterized protein [Source:UniProtKB/TrEMBL;Acc:F1SMV7]	gene	overlapping	0	-2.99805	-2.30222	-2.64773
B3GNT7	15	145896312	145897520	-	NaN	B3GNT7	ENSSSCG00000023347	Uncharacterized protein [Source:UniProtKB/TrEMBL;Acc:F1SMV7]	gene	overlapping	0	-2.99805	-2.30222	-2.64773
B3GNT8	6	45233203	45234396	+	NaN	B9D2	ENSSSCG00000003013	Uncharacterized protein [Source:UniProtKB/TrEMBL;Acc:F1RH86]	gene	overlapping	0	-2.99805	-2.30222	-2.64773
B3GNT8	6	45290992	45292185	-	NaN	BCKDHA	ENSSSCG00000028794	2-oxoisovalerate dehydrogenase subunit alpha, mitochondrial [Source:RefSeq peptide;Acc:NP_001116555]	gene	overlapping	0	-2.94738	-1.86755	-2.64773
B3GNTL1	12	411175	478751	-	NaN	B3GNTL1	ENSSSCG00000027229	UDP-GlcNAc:betaGal beta-1,3-N-acetylglucosaminyltransferase-like 1 [Source:HGNC Symbol;Acc:21727]	gene	overlapping	0	-2.94738	-1.21444	-2.59706
B4GALT1	10	37574130	37635309	+	NaN	B4GALT1	ENSSSCG00000010998	Uncharacterized protein [Source:UniProtKB/TrEMBL;Acc:F1SE74]	gene	overlapping	0	4.30762	4.66715	4.01505
B4GALT2	6	154767528	154772160	-	NaN	B4GALT2	ENSSSCG00000026793	UDP-Gal:betaGlcNAc beta 1,4- galactosyltransferase, polypeptide 2 [Source:HGNC Symbol;Acc:925]	gene	overlapping	0	-2.61405	-2.30222	-2.64773
B4GALT3	4	97136072	97145070	+	NaN	B4GALT3	ENSSSCG00000006360	Uncharacterized protein [Source:UniProtKB/TrEMBL;Acc:F1S1A6]	gene	overlapping	0	4.83095	4.95389	4.15251
B4GALT4	14	54548900	54549867	+	NaN	B4GALT4	ENSSSCG00000010117	Uncharacterized protein [Source:UniProtKB/TrEMBL;Acc:F1RK65]	gene	overlapping	0	-2.99805	-2.30222	-2.64773
B4GALT5	17	57581157	57602483	-	NaN	B4GALT5	ENSSSCG00000007465	Uncharacterized protein [Source:UniProtKB/TrEMBL;Acc:F1SBE4]	gene	overlapping	0	5.02702	6.16839	4.84276
B4GALT6	6	108153077	108219519	-	NaN	B4GALT6	ENSSSCG00000025005	UDP-Gal:betaGlcNAc beta 1,4- galactosyltransferase, polypeptide 6 [Source:HGNC Symbol;Acc:929]	gene	overlapping	0	-1.43261	-0.426912	-1.73541
B9D2	6	45142576	45269369	-	NaN	B9D2	ENSSSCG00000003013	Uncharacterized protein [Source:UniProtKB/TrEMBL;Acc:F1RH86]	gene	overlapping	0	0.306413	-1.0059	-1.10575
BAALC_PIG	4	36747395	36761501	-	NaN	BAALC	ENSSSCG00000006053	Brain and acute leukemia cytoplasmic protein [Source:UniProtKB/Swiss-Prot;Acc:Q8WNE9]	gene	overlapping	0	-2.99805	-2.30222	-2.64773
BAAT	1	271586834	271591395	-	NaN	BAAT	ENSSSCG00000005398	Uncharacterized protein [Source:UniProtKB/TrEMBL;Acc:F1SSB1]	gene	overlapping	0	-2.99805	-2.30222	-2.64773
BACE1	9	49713827	49738850	-	NaN	RNF214	ENSSSCG00000015077	Uncharacterized protein [Source:UniProtKB/TrEMBL;Acc:F1SB99]	gene	overlapping	0	3.37248	2.97631	2.72084
BACE2	13	214758853	214845181	+	NaN	BACE2	ENSSSCG00000012074	Uncharacterized protein [Source:UniProtKB/TrEMBL;Acc:F1SG69]	gene	overlapping	0	2.68697	3.46035	0.496698
BACH1	13	203134183	203148106	+	NaN	BACH1	ENSSSCG00000012029	Uncharacterized protein [Source:UniProtKB/TrEMBL;Acc:F1SHM8]	gene	overlapping	0	3.76427	3.58438	3.21102
BACH2	1	64904130	65186708	-	NaN	BACH2	ENSSSCG00000004332	Uncharacterized protein [Source:UniProtKB/TrEMBL;Acc:F1RY17]	gene	overlapping	0	4.84042	4.37872	5.41971
BAD	2	6897945	6909698	+	NaN	BAD	ENSSSCG00000013033	BCL2-associated agonist of cell death [Source:HGNC Symbol;Acc:936]	gene	overlapping	0	-0.896715	-1.20089	3.07243
BAG1	10	37484539	37499096	+	NaN	BAG1	ENSSSCG00000010996	Uncharacterized protein [Source:UniProtKB/TrEMBL;Acc:F1SE85]	gene	overlapping	0	4.63572	4.45331	4.99666
BAG2	7	33129268	33140672	-	NaN	BAG2	ENSSSCG00000001494	Uncharacterized protein [Source:UniProtKB/TrEMBL;Acc:F1RZV1]	gene	overlapping	0	2.41713	1.24721	1.74684
BAG3	14	141034618	141058597	+	NaN	BAG3	ENSSSCG00000010686	Uncharacterized protein [Source:UniProtKB/TrEMBL;Acc:F1S415]	gene	overlapping	0	3.73968	4.36055	5.37347
BAG4	15	55469047	55479474	-	NaN	BAG4	ENSSSCG00000015817	Uncharacterized protein [Source:UniProtKB/TrEMBL;Acc:F1RZJ6]	gene	overlapping	0	-0.594418	1.46703	0.419216
BAG6	7	27483279	27495106	+	NaN	BAG6	ENSSSCG00000001410	Large proline-rich protein BAG6 [Source:UniProtKB/Swiss-Prot;Acc:A5D9M6]	gene	overlapping	0	5.33364	4.72058	4.93518
BAG6_PIG	7	27483279	27495106	+	NaN	BAG6	ENSSSCG00000001410	Large proline-rich protein BAG6 [Source:UniProtKB/Swiss-Prot;Acc:A5D9M6]	gene	overlapping	0	5.1515	4.60678	4.78521
BAHCC1	12	1196639	1251035	-	NaN	BAHCC1	ENSSSCG00000023045	BAH domain and coiled-coil containing 1 [Source:HGNC Symbol;Acc:29279]	gene	overlapping	0	-2.99805	-2.30222	-2.64773
BAHD1	1	145935020	145954390	-	NaN	BAHD1	ENSSSCG00000004772	Uncharacterized protein [Source:UniProtKB/TrEMBL;Acc:F1SSR6]	gene	overlapping	0	2.53784	2.95326	3.23183
BAI2	6	81956138	81986369	+	NaN	BAI2	ENSSSCG00000003604	Uncharacterized protein [Source:UniProtKB/TrEMBL;Acc:F1SV98]	gene	overlapping	0	-2.99805	-2.30222	-2.64773
BAI3	1	55298662	55774196	+	NaN	BAI3	ENSSSCG00000004270	Uncharacterized protein [Source:UniProtKB/TrEMBL;Acc:F1RTT7]	gene	overlapping	0	-2.99805	-2.30222	-2.64773
BAIAP1	13	51684590	51818543	-	NaN	BAIAP1	ENSSSCG00000011497	BAI1-associated protein 1 [Source:UniProtKB/TrEMBL;Acc:Q8MJM7]	gene	overlapping	0	6.14296	5.90098	5.40301
BAIAP2	12	1516513	1572531	-	NaN	BAIAP2	ENSSSCG00000017142	Uncharacterized protein [Source:UniProtKB/TrEMBL;Acc:F1RZB1]	gene	overlapping	0	-0.534228	-0.634075	-2.64773
BAIAP2L1	3	5439927	5589075	-	NaN	LMTK2	ENSSSCG00000007599	Uncharacterized protein [Source:UniProtKB/TrEMBL;Acc:F1RFL2]	gene	overlapping	0	5.04758	4.73829	4.00614
BAIAP2L2	5	7187425	7199589	+	NaN	BAIAP2L2	ENSSSCG00000000111	Uncharacterized protein [Source:UniProtKB/TrEMBL;Acc:F1SKP3]	gene	overlapping	0	-2.99805	-2.30222	-2.64773
BAIAP3	3	41977519	41985898	+	NaN	BAIAP3	ENSSSCG00000008029	Uncharacterized protein [Source:UniProtKB/TrEMBL;Acc:F1RFZ7]	gene	overlapping	0	-2.99805	-2.30222	-2.64773
BAK1	7	34279881	34288116	+	NaN	BAK1	ENSSSCG00000001516	Uncharacterized protein [Source:UniProtKB/TrEMBL;Acc:F1RZR2]	gene	overlapping	0	3.3479	2.59452	5.58423
BANF1	2	5405034	5405903	-	NaN	BANF1	ENSSSCG00000012961	Uncharacterized protein [Source:UniProtKB/TrEMBL;Acc:F1RU33]	gene	overlapping	0	4.89592	5.01447	5.59592
BANF1	2	5437528	5438439	-	NaN	BANF1	ENSSSCG00000027377	Uncharacterized protein [Source:UniProtKB/TrEMBL;Acc:F1RU33]	gene	overlapping	0	-2.0116	-1.72323	-0.829062
BANF2	17	29567711	29580150	+	NaN	BANF2	ENSSSCG00000007087	Uncharacterized protein [Source:UniProtKB/TrEMBL;Acc:F1SBI2]	gene	overlapping	0	-2.99805	-2.30222	-1.82309
BANK1	8	128229409	128321167	-	NaN	BANK1	ENSSSCG00000009171	Uncharacterized protein [Source:UniProtKB/TrEMBL;Acc:F1S101]	gene	overlapping	0	-2.99805	-1.58489	0.779363
BANP	6	1585825	1595724	-	NaN	BANP	ENSSSCG00000020678	BTG3 associated nuclear protein [Source:HGNC Symbol;Acc:13450]	gene	overlapping	0	-2.61405	-2.30222	-2.64773
BAP1	13	37758291	37767103	-	NaN	BAP1	ENSSSCG00000011438	Uncharacterized protein [Source:UniProtKB/TrEMBL;Acc:F1SIW6]	gene	overlapping	0	3.62499	3.91744	3.37981
BARD1	15	129595247	129677996	-	NaN	BARD1	ENSSSCG00000016170	BRCA1 associated RING domain 1 [Source:HGNC Symbol;Acc:952]	gene	overlapping	0	2.19516	3.37841	3.30939
BARHL1	1	306405795	306412475	+	NaN	BARHL1	ENSSSCG00000005730	Uncharacterized protein [Source:UniProtKB/TrEMBL;Acc:F1S0T9]	gene	overlapping	0	-2.99805	-2.30222	-2.64773
BARHL2	4	137708217	137714712	+	NaN	BARHL2	ENSSSCG00000006914	Uncharacterized protein [Source:UniProtKB/TrEMBL;Acc:F1S4E7]	gene	overlapping	0	-2.99805	-1.09841	-2.64773
BARX1	3	44604598	44607580	-	NaN	BARX1	ENSSSCG00000008081	Uncharacterized protein [Source:UniProtKB/TrEMBL;Acc:F1SUC6]	gene	overlapping	0	-2.99805	-2.30222	-2.64773
BARX2	9	62607366	62620602	+	NaN	BARX2	ENSSSCG00000015239	Uncharacterized protein [Source:UniProtKB/TrEMBL;Acc:F1S6F3]	gene	overlapping	0	-2.99805	-2.30222	-2.64773
BATF2	2	6312310	6321081	+	NaN	BATF2	ENSSSCG00000023178	basic leucine zipper transcription factor, ATF-like 2 [Source:HGNC Symbol;Acc:25163]	gene	overlapping	0	-2.41906	-2.30222	-2.59706
BATF3	9	143623163	143635841	+	NaN	BATF3	ENSSSCG00000015594	Uncharacterized protein [Source:UniProtKB/TrEMBL;Acc:F1S2W2]	gene	overlapping	0	-2.99805	-2.30222	-1.23458
BATF3	9	143794654	143806865	-	NaN	BATF3	ENSSSCG00000026587	basic leucine zipper transcription factor, ATF-like 3 [Source:HGNC Symbol;Acc:28915]	gene	overlapping	0	-2.99805	-2.30222	-2.64773
BAX-ALPHA	6	50100687	50106251	-	NaN	BAX-ALPHA	ENSSSCG00000003144	Bax-alpha protein [Source:UniProtKB/TrEMBL;Acc:Q70AD3]	gene	overlapping	0	-1.13491	-0.760245	-1.36358
BAZ1B	3	10460754	10543512	-	NaN	BAZ1B	ENSSSCG00000027342	Uncharacterized protein [Source:UniProtKB/TrEMBL;Acc:F1RJN2]	gene	overlapping	0	5.80064	5.86199	6.90808
BAZ2A	5	23608231	23638130	-	NaN	BAZ2A	ENSSSCG00000000403	Uncharacterized protein [Source:UniProtKB/TrEMBL;Acc:F1SLA2]	gene	overlapping	0	6.45054	5.95647	6.45499
BAZ2B	15	73484139	73618436	-	NaN	BAZ2B	ENSSSCG00000015882	Uncharacterized protein [Source:UniProtKB/TrEMBL;Acc:F1RPS1]	gene	overlapping	0	2.81184	1.48037	1.45537
BBOX1	2	35864281	35883381	-	NaN	BBOX1	ENSSSCG00000013337	Uncharacterized protein [Source:UniProtKB/TrEMBL;Acc:F1SGL4]	gene	overlapping	0	-0.978419	-1.53422	-2.64773
BBS1	2	4793528	4810745	+	NaN	BBS1	ENSSSCG00000012946	Uncharacterized protein [Source:UniProtKB/TrEMBL;Acc:F1RU51]	gene	overlapping	0	-2.99805	-2.30222	-2.64773
BBS1	2	4965113	4982609	-	NaN	BBS1	ENSSSCG00000025339	Uncharacterized protein [Source:UniProtKB/TrEMBL;Acc:F1RU51]	gene	overlapping	0	-2.99805	-2.30222	-2.64773
BBS10	5	43253069	43256417	-	NaN	BBS10	ENSSSCG00000000523	Uncharacterized protein [Source:UniProtKB/TrEMBL;Acc:F1SGD6]	gene	overlapping	0	0.587022	1.23218	0.93734
BBS2	6	26446675	26473876	+	NaN	BBS2	ENSSSCG00000025417	Bardet-Biedl syndrome 2 [Source:HGNC Symbol;Acc:967]	gene	overlapping	0	-2.08573	-1.58489	-1.9304
BBS4	7	65150183	65267689	+	NaN	BBS4	ENSSSCG00000001924	Uncharacterized protein [Source:UniProtKB/TrEMBL;Acc:F1SI91]	gene	overlapping	0	1.44324	-0.0935787	-1.73541
BBS7	8	109408944	109453702	+	NaN	BBS7	ENSSSCG00000009093	Uncharacterized protein [Source:UniProtKB/TrEMBL;Acc:F1S1T9]	gene	overlapping	0	0.46024	0.65573	-1.30074
BBS9	18	43753100	43977664	-	NaN	BBS9	ENSSSCG00000016667	Uncharacterized protein [Source:UniProtKB/TrEMBL;Acc:F1SIK4]	gene	overlapping	0	-2.94738	-1.25156	-1.87973
BBX	13	160759311	160875310	-	NaN	BBX	ENSSSCG00000011943	Uncharacterized protein [Source:UniProtKB/TrEMBL;Acc:F1SL36]	gene	overlapping	0	3.92035	2.08786	3.68268
BCAM	6	47198331	47210379	+	NaN	BCAM	ENSSSCG00000020657	basal cell adhesion molecule (Lutheran blood group) [Source:HGNC Symbol;Acc:6722]	gene	overlapping	0	3.3312	2.57165	0.0892335
BCAN	4	102095809	102114619	-	NaN	BCAN	ENSSSCG00000006477	Uncharacterized protein [Source:UniProtKB/TrEMBL;Acc:F1RP38]	gene	overlapping	0	-2.23005	-1.53422	2.39153
BCAP29	9	118047025	118084880	+	NaN	BCAP29	ENSSSCG00000022869	B-cell receptor-associated protein 29 [Source:HGNC Symbol;Acc:24131]	gene	overlapping	0	2.44699	2.55262	0.894246
BCAP31	X	142021364	142049294	-	NaN	BCAP31	ENSSSCG00000012772	Uncharacterized protein [Source:UniProtKB/TrEMBL;Acc:F1S2A8]	gene	overlapping	0	5.65879	5.3905	6.20998
BCAR1	6	12235319	12247078	+	NaN	BCAR1	ENSSSCG00000028878	breast cancer anti-estrogen resistance 1 [Source:HGNC Symbol;Acc:971]	gene	overlapping	0	-1.6276	-1.37624	-1.01808
BCAR3	4	135280375	135321500	+	NaN	BCAR3	ENSSSCG00000006893	Uncharacterized protein [Source:UniProtKB/TrEMBL;Acc:F1S536]	gene	overlapping	0	-0.311753	0.467029	-1.10575
BCAS3	12	38622720	39039993	-	NaN	BCAS3	ENSSSCG00000017676	Uncharacterized protein [Source:UniProtKB/TrEMBL;Acc:F1S209]	gene	overlapping	0	4.15902	2.6577	2.47179
BCAT1	5	52535052	52594736	+	NaN	BCAT1	ENSSSCG00000029163	branched chain amino-acid transaminase 1, cytosolic [Source:HGNC Symbol;Acc:976]	gene	overlapping	0	5.23083	3.58828	3.97781
BCAT2_PIG	6	49854907	49871606	-	NaN	BCAT2	ENSSSCG00000003139	Branched-chain-amino-acid aminotransferase, mitochondrial [Source:UniProtKB/Swiss-Prot;Acc:O19098]	gene	overlapping	0	-0.33222	1.2964	1.68156
BCCIP	14	146760228	146773252	+	NaN	UROS	ENSSSCG00000010742	uroporphyrinogen-III synthase isoform 1 [Source:RefSeq peptide;Acc:NP_001231294]	gene	overlapping	0	4.48477	4.4027	4.74147
BCDIN3D	5	16197445	16207490	+	NaN	BCDIN3D	ENSSSCG00000026576	Uncharacterized protein [Source:UniProtKB/TrEMBL;Acc:F1SHA8]	gene	overlapping	0	2.43533	2.98341	4.26883
BCKDHB	1	96425074	96526987	+	NaN	BCKDHB	ENSSSCG00000026384	branched chain keto acid dehydrogenase E1, beta polypeptide [Source:HGNC Symbol;Acc:987]	gene	overlapping	0	-2.99805	-2.30222	-2.64773
BCKDK	3	17491365	17496691	+	NaN	BCKDK	ENSSSCG00000007763	Uncharacterized protein [Source:UniProtKB/TrEMBL;Acc:F1RIR7]	gene	overlapping	0	3.7105	2.86526	3.55004
BCL11A	3	85284284	85374450	+	NaN	BCL11A	ENSSSCG00000008392	B-cell CLL/lymphoma 11A (zinc finger protein) [Source:HGNC Symbol;Acc:13221]	gene	overlapping	0	-2.99805	-2.30222	-2.64773
BCL11B	7	127764460	127767139	-	NaN	BCL11B	ENSSSCG00000002507	Uncharacterized protein [Source:UniProtKB/TrEMBL;Acc:F1SAQ5]	gene	overlapping	0	-2.99805	-2.30222	-2.64773
BCL2	1	175695537	175696139	-	NaN	BCL2	ENSSSCG00000004895	Uncharacterized protein [Source:UniProtKB/TrEMBL;Acc:F1SMW2]	gene	overlapping	0	-2.99805	-2.30222	-2.64773
BCL2L10	1	132686939	132689560	+	NaN	BCL2L10	ENSSSCG00000004623	Uncharacterized protein [Source:UniProtKB/TrEMBL;Acc:F1RZB9]	gene	overlapping	0	-2.99805	-2.30222	-2.64773
BCL2L12	6	50435027	50444473	+	NaN	IRF3	ENSSSCG00000003178	Interferon regulatory factor 3 [Source:UniProtKB/Swiss-Prot;Acc:Q764M6]	gene	overlapping	0	-2.56338	0.101409	-1.35141
BCL2L13	5	72062877	72116345	+	NaN	BCL2L13	ENSSSCG00000023043	Uncharacterized protein [Source:UniProtKB/TrEMBL;Acc:F1SHR2]	gene	overlapping	0	5.65096	5.32231	5.60159
BCL2L15	4	116879922	116887481	+	NaN	BCL2L15	ENSSSCG00000006763	Uncharacterized protein [Source:UniProtKB/TrEMBL;Acc:F1SBR1]	gene	overlapping	0	-0.480739	-0.274643	-1.68474
BCL2L2	7	80971090	80972334	+	NaN	BCL2L2	ENSSSCG00000002022	Uncharacterized protein [Source:UniProtKB/TrEMBL;Acc:F1S9E4]	gene	overlapping	0	-2.99805	-2.30222	-2.64773
BCL3	6	47155210	47168053	+	NaN	BCL3	ENSSSCG00000027426	B-cell chronic lymphatic leukemia protein 3 [Source:UniProtKB/TrEMBL;Acc:G9M4N0]	gene	overlapping	0	1.62736	2.34068	1.47449
BCL6	13	134660903	134684897	-	NaN	BCL6	ENSSSCG00000011810	Uncharacterized protein [Source:UniProtKB/TrEMBL;Acc:F1SFH8]	gene	overlapping	0	-0.716996	-1.86755	-2.59706
BCL6B	12	54708169	54711360	-	NaN	BCL6B	ENSSSCG00000017927	Uncharacterized protein [Source:UniProtKB/TrEMBL;Acc:F1RFR9]	gene	overlapping	0	-2.99805	-1.47758	-2.64773
BCL7A	14	32472535	32504412	-	NaN	BCL7A	ENSSSCG00000009801	Uncharacterized protein [Source:UniProtKB/TrEMBL;Acc:F1RNS0]	gene	overlapping	0	1.43513	2.08643	1.97583
BCL7B	3	10550014	10568958	-	NaN	BCL7B	ENSSSCG00000007708	Uncharacterized protein [Source:UniProtKB/TrEMBL;Acc:F1RJN5]	gene	overlapping	0	3.47716	1.90538	2.24571
BCL7C	3	17949269	17953736	-	NaN	BCL7C	ENSSSCG00000007776	Uncharacterized protein [Source:UniProtKB/TrEMBL;Acc:F1RG97]	gene	overlapping	0	-0.252261	1.46074	-0.271587
BCL9_PIG	4	109803776	109819766	-	NaN	BCL9	ENSSSCG00000006698	B-cell CLL/lymphoma 9 protein [Source:UniProtKB/Swiss-Prot;Acc:Q95KQ6]	gene	overlapping	0	4.6793	3.40159	3.81523
BCL9L	9	51178780	51209999	-	NaN	CXCR5	ENSSSCG00000015098	Uncharacterized protein [Source:UniProtKB/TrEMBL;Acc:F1SAJ4]	gene	overlapping	0	2.66765	2.55954	3.54305
BCL-G	5	63690799	63713753	-	NaN	BCL-G	ENSSSCG00000000623	Uncharacterized protein [Source:UniProtKB/TrEMBL;Acc:F1SQ66]	gene	overlapping	0	-2.94738	-1.72323	-0.193432
BCO2	9	44724879	44767958	+	NaN	BCO2	ENSSSCG00000015039	Uncharacterized protein [Source:UniProtKB/TrEMBL;Acc:F1SM94]	gene	overlapping	0	-2.94738	-2.25156	-2.26373
BCOR	X	39823441	39869551	-	NaN	BCOR	ENSSSCG00000012241	Uncharacterized protein [Source:UniProtKB/TrEMBL;Acc:F1RXQ4]	gene	overlapping	0	3.38599	3.86977	5.15423
BCORL1	X	122332162	122381559	+	NaN	BCORL1	ENSSSCG00000012655	Uncharacterized protein [Source:UniProtKB/TrEMBL;Acc:F1RTH5]	gene	overlapping	0	2.59553	1.91016	2.29902
BCR	14	52719300	52771846	+	NaN	BCR	ENSSSCG00000010052	breakpoint cluster region [Source:HGNC Symbol;Acc:1014]	gene	overlapping	0	3.8341	2.72406	1.60324
BDH2	8	126944220	126967969	+	NaN	ENSSSCG00000009162	ENSSSCG00000009162	Uncharacterized protein [Source:UniProtKB/TrEMBL;Acc:F1S110]	gene	overlapping	0	-1.65106	-0.426912	0.697376
BDNF_PIG	2	35227847	35262533	+	NaN	BDNF	ENSSSCG00000013333	Brain-derived neurotrophic factor [Source:UniProtKB/Swiss-Prot;Acc:P14082]	gene	overlapping	0	-0.969595	-2.25156	-1.9304
BDP1	16	51748146	51853075	+	NaN	BDP1	ENSSSCG00000016968	Uncharacterized protein [Source:UniProtKB/TrEMBL;Acc:F1SK28]	gene	overlapping	0	6.68209	6.65988	7.28511
BECN1_PIG	12	20256869	20269818	+	NaN	BECN1	ENSSSCG00000017386	Beclin-1 [Source:UniProtKB/Swiss-Prot;Acc:Q4A1L5]	gene	overlapping	0	4.41539	4.66947	3.85817
BEND2	X	15796125	15832560	-	NaN	BEND2	ENSSSCG00000012154	BEN domain containing 2 [Source:HGNC Symbol;Acc:28509]	gene	overlapping	0	-2.99805	-2.25156	-2.64773
BEND4	8	34797955	34832327	-	NaN	BEND4	ENSSSCG00000008802	Uncharacterized protein [Source:UniProtKB/TrEMBL;Acc:F1S3T9]	gene	overlapping	0	-2.99805	-2.30222	-2.64773
BEND6	7	33231047	33273159	-	NaN	BEND6	ENSSSCG00000001498	Uncharacterized protein [Source:UniProtKB/TrEMBL;Acc:F1RZU9]	gene	overlapping	0	-2.99805	-2.30222	-2.64773
BEST1	2	8987625	8996494	-	NaN	BEST1	ENSSSCG00000023090	Bestrophin-1 [Source:UniProtKB/Swiss-Prot;Acc:Q8WMR7]	gene	overlapping	0	-2.99805	-2.30222	-2.64773
BEST1_PIG	2	8986541	8996486	-	NaN	BEST1	ENSSSCG00000023090	Bestrophin-1 [Source:UniProtKB/Swiss-Prot;Acc:Q8WMR7]	gene	overlapping	0	-2.99805	-2.30222	-2.64773
BEST2	2	66472341	66477708	+	NaN	BEST2	ENSSSCG00000013733	Uncharacterized protein [Source:UniProtKB/TrEMBL;Acc:F1SDY1]	gene	overlapping	0	3.69425	2.82311	1.183
BEST3	5	36514155	36552888	-	NaN	FRS2	ENSSSCG00000000493	fibroblast growth factor receptor substrate 2 [Source:RefSeq peptide;Acc:NP_001230138]	gene	overlapping	0	-2.99805	-2.30222	-2.64773
BEST4	6	154032313	154038467	-	NaN	TMEM53	ENSSSCG00000027423	transmembrane protein 53 [Source:HGNC Symbol;Acc:26186]	gene	overlapping	0	-1.51271	-1.48355	1.11943
BET1	9	80823453	80833936	-	NaN	BET1	ENSSSCG00000015325	Uncharacterized protein [Source:UniProtKB/TrEMBL;Acc:F1SFA8]	gene	overlapping	0	2.10668	2.70547	1.67814
BET1L	2	162193997	162195837	+	NaN	ENSSSCG00000014564	ENSSSCG00000014564	Ifitm1-like protein [Source:UniProtKB/TrEMBL;Acc:A9QW81]	gene	overlapping	0	-2.99805	-2.30222	-2.21306
BETA-ACTIN	12	1163225	1166027	+	NaN	BETA-ACTIN	ENSSSCG00000028355	Beta-actin [Source:UniProtKB/TrEMBL;Acc:A0SNU5]	gene	overlapping	0	9.93546	10.1423	10.3516
BEX5	X	97469440	97469778	-	NaN	BEX5	ENSSSCG00000012514	Uncharacterized protein [Source:UniProtKB/TrEMBL;Acc:F1RYG4]	gene	overlapping	0	-2.99805	-1.47758	-2.64773
BFSP1	17	29343180	29376083	-	NaN	BFSP1	ENSSSCG00000007084	beaded filament structural protein 1, filensin [Source:HGNC Symbol;Acc:1040]	gene	overlapping	0	-2.56338	-2.30222	-1.59706
BFSP2	13	82022646	82101148	+	NaN	BFSP2	ENSSSCG00000011636	Uncharacterized protein [Source:UniProtKB/TrEMBL;Acc:F1SLB0]	gene	overlapping	0	-2.99805	-2.30222	-2.64773
BGLR_PIG	3	16924757	16939447	+	NaN	GUSB	ENSSSCG00000007739	Beta-glucuronidase [Source:UniProtKB/Swiss-Prot;Acc:Q4FAT7]	gene	overlapping	0	1.17956	2.67053	-0.69829
BGN	X	141854443	141858874	+	NaN	BGN	ENSSSCG00000012766	Biglycan [Source:UniProtKB/TrEMBL;Acc:F1S2B6]	gene	overlapping	0	-2.99805	-2.25156	-1.82309
BHLHA15	3	5470550	5471104	+	NaN	BAIAP2L1	ENSSSCG00000007602	Uncharacterized protein [Source:UniProtKB/TrEMBL;Acc:F1RFK7]	gene	overlapping	0	-2.99805	-2.30222	-2.64773
BHLHA9	12	48732402	48733076	-	NaN	BHLHA9	ENSSSCG00000017802	Uncharacterized protein [Source:UniProtKB/TrEMBL;Acc:F1RHK4]	gene	overlapping	0	-2.99805	-2.30222	-2.64773
BHLHB9	X	97848044	97849720	+	NaN	BHLHB9	ENSSSCG00000012520	Uncharacterized protein [Source:UniProtKB/TrEMBL;Acc:F1RYE8]	gene	overlapping	0	-2.99805	-2.30222	-2.06874
BHLHE22	4	75987598	75988707	-	NaN	BHLHE22	ENSSSCG00000006222	Uncharacterized protein [Source:UniProtKB/TrEMBL;Acc:F1RTA8]	gene	overlapping	0	-2.99805	-2.30222	-2.64773
BHLHE40	13	67832083	67836984	+	NaN	BHLHE40	ENSSSCG00000011534	Uncharacterized protein [Source:UniProtKB/TrEMBL;Acc:F1SFL2]	gene	overlapping	0	3.34919	2.97189	0.47022
BHLHE41	5	51429364	51435089	+	NaN	BHLHE41	ENSSSCG00000028552	basic helix-loop-helix family, member e41 [Source:HGNC Symbol;Acc:16617]	gene	overlapping	0	-1.07207	-1.20089	-1.10575
BHMT1_PIG	2	89407762	89431635	-	NaN	BHMT	ENSSSCG00000014108	Betaine--homocysteine S-methyltransferase 1 [Source:UniProtKB/Swiss-Prot;Acc:Q95332]	gene	overlapping	0	-2.99805	-2.30222	-2.64773
BICC1	14	66692886	66911519	+	NaN	BICC1	ENSSSCG00000010204	Uncharacterized protein [Source:UniProtKB/TrEMBL;Acc:F1RG08]	gene	overlapping	0	-2.61405	-0.686115	-1.30074
BICD1	5	45092998	45301669	-	NaN	BICD1	ENSSSCG00000000531	Uncharacterized protein [Source:UniProtKB/TrEMBL;Acc:F1SGB9]	gene	overlapping	0	-1.46091	-2.30222	-2.64773
BICD2	3	43631067	43647126	-	NaN	BICD2	ENSSSCG00000008075	Uncharacterized protein [Source:UniProtKB/TrEMBL;Acc:F1SUE0]	gene	overlapping	0	0.953534	-0.565258	-1.11059
BID_PIG	5	72118717	72143297	-	NaN	BID	ENSSSCG00000000769	BH3-interacting domain death agonist [Source:UniProtKB/Swiss-Prot;Acc:Q4JHS0]	gene	overlapping	0	2.59506	2.4088	4.19559
BIN3	14	7354351	7376638	-	NaN	KIAA1967	ENSSSCG00000009628	p30 DBC protein [Source:RefSeq peptide;Acc:NP_001193269]	gene	overlapping	0	1.95487	1.38556	2.61753
BIRC2	9	36990711	37009476	+	NaN	BIRC2	ENSSSCG00000027529	baculoviral IAP repeat containing 2 [Source:HGNC Symbol;Acc:590]	gene	overlapping	0	2.2622	2.92675	3.63819
BIRC6	3	113955609	114112318	-	NaN	BIRC6	ENSSSCG00000008513	Uncharacterized protein [Source:UniProtKB/TrEMBL;Acc:F1S402]	gene	overlapping	0	6.41738	6.59375	6.13793
BIVM	11	78484671	78490845	-	NaN	ENSSSCG00000009532	ENSSSCG00000009532	No description	gene	overlapping	0	0.602051	2.43321	2.30385
BKRB1_PIG	7	124748052	124749113	+	NaN	BDKRB1	ENSSSCG00000002501	B1 bradykinin receptor [Source:UniProtKB/Swiss-Prot;Acc:Q8HZN9]	gene	overlapping	0	-2.99805	-2.30222	-2.64773
BKRB2_PIG	7	124702126	124709258	+	NaN	BDKRB2	ENSSSCG00000027030	B2 bradykinin receptor [Source:UniProtKB/Swiss-Prot;Acc:Q9GLX8]	gene	overlapping	0	-2.99805	-2.30222	-2.64773
BLK	14	15915885	15933527	+	NaN	BLK	ENSSSCG00000027568	B lymphoid tyrosine kinase [Source:HGNC Symbol;Acc:1057]	gene	overlapping	0	-2.99805	-2.30222	-2.64773
BLMH	12	48149926	48173272	+	NaN	BLMH	ENSSSCG00000017796	Uncharacterized protein [Source:UniProtKB/TrEMBL;Acc:F1RN71]	gene	overlapping	0	4.42274	4.24282	4.88423
BLMH	12	48186321	48193241	-	NaN	BLMH	ENSSSCG00000027883	bleomycin hydrolase [Source:HGNC Symbol;Acc:1059]	gene	overlapping	0	-0.122739	-0.0477441	0.163364
BLNK	14	117264741	117349999	-	NaN	BLNK	ENSSSCG00000010504	Uncharacterized protein [Source:UniProtKB/TrEMBL;Acc:F1SBG3]	gene	overlapping	0	1.0238	2.67282	-1.15642
BLOC1S1	5	22636700	22640696	+	NaN	BLOC1S1	ENSSSCG00000000359	biogenesis of lysosomal organelles complex-1, subunit 1 [Source:HGNC Symbol;Acc:4200]	gene	overlapping	0	0.407803	2.22707	-0.864932
BLOC1S2	14	120893569	120900535	-	NaN	BLOC1S2	ENSSSCG00000010551	Uncharacterized protein [Source:UniProtKB/TrEMBL;Acc:F1S8V1]	gene	overlapping	0	3.53761	3.09795	3.98895
BLVRA	18	56025224	56079185	-	NaN	BLVRA	ENSSSCG00000016756	Uncharacterized protein [Source:UniProtKB/TrEMBL;Acc:F1SSF5]	gene	overlapping	0	-2.99805	-2.25156	-2.64773
BLVRB	6	44463596	44476850	-	NaN	BLVRB	ENSSSCG00000021067	biliverdin reductase B (flavin reductase (NADPH)) [Source:HGNC Symbol;Acc:1063]	gene	overlapping	0	6.24777	5.42845	5.37217
BLZF1	4	89219513	89250809	-	NaN	BLZF1	ENSSSCG00000022396	basic leucine zipper nuclear factor 1 [Source:HGNC Symbol;Acc:1065]	gene	overlapping	0	2.11728	2.97642	1.67551
BMAL1	2	49317637	49340140	-	NaN	BMAL1	ENSSSCG00000013397	Uncharacterized protein [Source:UniProtKB/TrEMBL;Acc:F1S6X1]	gene	overlapping	0	-2.41906	-1.91822	-2.59706
BMI1	10	58240662	58246682	-	NaN	BMI1	ENSSSCG00000011081	Polycomb ring finger protein; Uncharacterized protein [Source:UniProtKB/TrEMBL;Acc:F2Z5D1]	gene	overlapping	0	3.70516	4.2421	3.82592
BMP1	14	6881426	6923145	+	NaN	BMP1	ENSSSCG00000009620	Uncharacterized protein [Source:UniProtKB/TrEMBL;Acc:F1RMB2]	gene	overlapping	0	-2.99805	-2.25156	-2.64773
BMP-10	3	77127186	77133018	-	NaN	BMP-10	ENSSSCG00000008345	Uncharacterized protein [Source:UniProtKB/TrEMBL;Acc:F1SLB8]	gene	overlapping	0	-2.99805	-2.30222	-2.64773
BMP2K	8	147991654	148031534	+	NaN	BMP2K	ENSSSCG00000027722	BMP2 inducible kinase [Source:HGNC Symbol;Acc:18041]	gene	overlapping	0	1.36985	3.03942	1.21873
BMPER	18	43216779	43462084	-	NaN	BMPER	ENSSSCG00000016665	Uncharacterized protein [Source:UniProtKB/TrEMBL;Acc:F1SIK5]	gene	overlapping	0	2.94362	4.06214	3.53147
BMPR1B	8	133740991	133875493	-	NaN	BMPR1B	ENSSSCG00000029621	Uncharacterized protein [Source:UniProtKB/TrEMBL;Acc:F1RWW6]	gene	overlapping	0	3.42024	2.68373	-1.5464
BMS1	14	65917857	65932755	+	NaN	ENSSSCG00000010198	ENSSSCG00000010198	No description	gene	overlapping	0	4.69299	4.24533	5.76789
BMX	X	13004920	13056648	+	NaN	BMX	ENSSSCG00000012137	Uncharacterized protein [Source:UniProtKB/TrEMBL;Acc:F1SQT2]	gene	overlapping	0	-1.84007	-1.20089	-1.05509
BNC1	7	57155758	57166477	+	NaN	BNC1	ENSSSCG00000001798	Uncharacterized protein [Source:UniProtKB/TrEMBL;Acc:F1RIB5]	gene	overlapping	0	-2.99805	-2.30222	-1.48975
BNC2	1	229662567	230108309	+	NaN	BNC2	ENSSSCG00000025613	Uncharacterized protein [Source:UniProtKB/TrEMBL;Acc:F1SNE1]	gene	overlapping	0	1.30229	2.98523	-2.1624
BNIP1	16	55441390	55453408	-	NaN	BNIP1	ENSSSCG00000016985	Uncharacterized protein [Source:UniProtKB/TrEMBL;Acc:F1SJY7]	gene	overlapping	0	2.72884	1.69874	2.75187
BNIP3	14	152194734	152204810	-	NaN	BNIP3	ENSSSCG00000024388	BCL2/adenovirus E1B 19kDa interacting protein 3 [Source:HGNC Symbol;Acc:1084]	gene	overlapping	0	3.70211	3.5323	4.1735
BNIP3L	14	11483860	11510801	+	NaN	BNIP3L	ENSSSCG00000009658	Uncharacterized protein [Source:UniProtKB/TrEMBL;Acc:F1RJT5]	gene	overlapping	0	4.32907	3.89282	3.24097
BNIPL	4	107437118	107446158	-	NaN	BNIPL	ENSSSCG00000006640	Uncharacterized protein [Source:UniProtKB/TrEMBL;Acc:F1SSA0]	gene	overlapping	0	-1.36839	0.0447672	-0.864932
BOC	13	156229052	156230160	-	NaN	BOC	ENSSSCG00000011922	Uncharacterized protein [Source:UniProtKB/TrEMBL;Acc:F1SLU4]	gene	overlapping	0	-2.99805	-1.47758	-2.64773
BOD1	16	54988239	54996836	-	NaN	BOD1	ENSSSCG00000016982	Uncharacterized protein [Source:UniProtKB/TrEMBL;Acc:F1SJZ3]	gene	overlapping	0	2.7155	3.86058	4.01447
BOD1L	8	8734449	8791714	-	NaN	BOD1L	ENSSSCG00000008735	Uncharacterized protein [Source:UniProtKB/TrEMBL;Acc:F1S5F9]	gene	overlapping	0	6.24255	5.93164	6.86847
BOK	15	154816153	154817291	+	NaN	BOK	ENSSSCG00000016373	Uncharacterized protein [Source:UniProtKB/TrEMBL;Acc:F1SIN7]	gene	overlapping	0	-2.99805	-2.30222	-2.64773
BOLA3	3	72003219	72015067	+	NaN	BOLA3	ENSSSCG00000008291	Uncharacterized protein [Source:UniProtKB/TrEMBL;Acc:F1SLG8]	gene	overlapping	0	2.39801	2.7763	3.8506
BOLL	15	112634532	112667533	-	NaN	BOLL	ENSSSCG00000016082	Uncharacterized protein [Source:UniProtKB/TrEMBL;Acc:F1SI86]	gene	overlapping	0	-2.99805	-2.25156	-2.06874
BORA	11	49565676	49594964	+	NaN	BORA	ENSSSCG00000025120	bora, aurora kinase A activator [Source:HGNC Symbol;Acc:24724]	gene	overlapping	0	3.98833	4.06624	4.53316
BPHL	7	1947211	1974100	+	NaN	BPHL	ENSSSCG00000001008	biphenyl hydrolase-like (serine hydrolase) [Source:HGNC Symbol;Acc:1094]	gene	overlapping	0	-2.41906	0.685711	-2.64773
BPIA1_PIG	17	41704948	41711958	+	NaN	PLUNC	ENSSSCG00000007260	BPI fold-containing family A member 1 [Source:UniProtKB/Swiss-Prot;Acc:Q5XW65]	gene	overlapping	0	-2.99805	-2.30222	-2.64773
BPIFB3	17	41547755	41565347	-	NaN	BPIFB3	ENSSSCG00000026137	BPI fold containing family B, member 3 [Source:HGNC Symbol;Acc:16178]	gene	overlapping	0	-2.99805	-2.30222	-2.64773
BPIFB4	17	41525706	41540089	-	NaN	BPIFB4	ENSSSCG00000029295	BPI fold containing family B, member 4 [Source:HGNC Symbol;Acc:16179]	gene	overlapping	0	-2.99805	-2.30222	-2.64773
BPIFB6	17	41499390	41512343	+	NaN	BPIFB6	ENSSSCG00000025052	BPI fold containing family B, member 6 [Source:HGNC Symbol;Acc:16504]	gene	overlapping	0	0.790584	-1.20089	-2.64773
BPIFC	5	12328398	12364875	+	NaN	BPIFC	ENSSSCG00000000157	Uncharacterized protein [Source:UniProtKB/TrEMBL;Acc:F1SPS2]	gene	overlapping	0	-2.99805	-2.30222	-2.64773
BPNT1	10	11741455	11765922	-	NaN	BPNT1	ENSSSCG00000010822	Uncharacterized protein [Source:UniProtKB/TrEMBL;Acc:F1S9K3]	gene	overlapping	0	3.22696	2.67637	4.40712
BRAF	18	9534503	9629366	+	NaN	BRAF	ENSSSCG00000016494	v-raf murine sarcoma viral oncogene homolog B1 [Source:HGNC Symbol;Acc:1097]	gene	overlapping	0	3.3746	3.12211	3.89768
BRAT1	3	2109137	2121143	-	NaN	BRAT1	ENSSSCG00000007563	BRCA1-associated ATM activator 1 [Source:HGNC Symbol;Acc:21701]	gene	overlapping	0	0.651237	-1.48355	0.0522231
BRCA1	12	20029801	20091791	-	NaN	BRCA1	ENSSSCG00000022101	Breast cancer type 1 susceptibility protein homolog [Source:UniProtKB/TrEMBL;Acc:A5A751]	gene	overlapping	0	4.1639	4.38136	5.00462
BRD3	1	307475101	307507430	-	NaN	BRD3	ENSSSCG00000005749	bromodomain containing 3 [Source:HGNC Symbol;Acc:1104]	gene	overlapping	0	3.79733	3.20347	3.88329
BRD8	2	145880841	145900801	-	NaN	BRD8	ENSSSCG00000014327	Uncharacterized protein [Source:UniProtKB/TrEMBL;Acc:F1RH79]	gene	overlapping	0	4.04645	4.56628	5.14034
BRF2	15	55684466	55692371	+	NaN	BRF2	ENSSSCG00000024328	Uncharacterized protein [Source:UniProtKB/TrEMBL;Acc:F1RX86]	gene	overlapping	0	0.846224	1.49138	0.742353
BRI3BP	14	29888167	29904643	-	NaN	BRI3BP	ENSSSCG00000009757	Uncharacterized protein [Source:UniProtKB/TrEMBL;Acc:F1RFP4]	gene	overlapping	0	0.953534	1.71487	1.29667
BRIP1	12	37871327	37948031	+	NaN	BRIP1	ENSSSCG00000021384	BRCA1 interacting protein C-terminal helicase 1 [Source:HGNC Symbol;Acc:20473]	gene	overlapping	0	0.478279	2.40902	2.91836
BRIX1	16	21414092	21422485	+	NaN	BRIX1	ENSSSCG00000016827	Uncharacterized protein [Source:UniProtKB/TrEMBL;Acc:F1SND4]	gene	overlapping	0	4.93423	4.90326	6.02723
BRK1	13	73387883	73396041	+	NaN	PRRT3	ENSSSCG00000011561	Uncharacterized protein [Source:UniProtKB/TrEMBL;Acc:F1SQC7]	gene	overlapping	0	0.944908	2.04602	0.86321
BRMS1	2	5122632	5130266	+	NaN	BRMS1	ENSSSCG00000012939	Uncharacterized protein [Source:UniProtKB/TrEMBL;Acc:F1RUT0]	gene	overlapping	0	1.73406	1.19057	2.43581
BRMS1L	7	69057750	69098319	-	NaN	BRMS1L	ENSSSCG00000001947	Uncharacterized protein [Source:UniProtKB/TrEMBL;Acc:F2Z5N1]	gene	overlapping	0	2.45613	2.74619	3.38852
BROX	10	13624315	13636566	+	NaN	BROX	ENSSSCG00000010836	Uncharacterized protein [Source:UniProtKB/TrEMBL;Acc:F1S9G9]	gene	overlapping	0	0.902866	2.21929	1.56216
BRP44	4	90745388	90767619	+	NaN	BRP44	ENSSSCG00000006304	Uncharacterized protein [Source:UniProtKB/TrEMBL;Acc:F1RPU8]	gene	overlapping	0	4.8051	4.77449	5.90954
BRP44L	X	40424217	40424546	+	NaN	BRP44L	ENSSSCG00000012248	Uncharacterized protein [Source:UniProtKB/TrEMBL;Acc:F1RX20]	gene	overlapping	0	-2.99805	-2.30222	-1.29477
BRPF1	13	73110017	73126369	-	NaN	BRPF1	ENSSSCG00000011548	Uncharacterized protein [Source:UniProtKB/TrEMBL;Acc:F1SQG0]	gene	overlapping	0	2.63012	3.1799	3.33086
BRPF3	7	36804604	36865913	+	NaN	BRPF3	ENSSSCG00000020803	bromodomain and PHD finger containing, 3 [Source:HGNC Symbol;Acc:14256]	gene	overlapping	0	3.74038	3.35755	3.7886
BRS3	X	127473615	127477877	+	NaN	BRS3	ENSSSCG00000025753	bombesin-like receptor 3 [Source:HGNC Symbol;Acc:1113]	gene	overlapping	0	-2.99805	-2.30222	-2.64773
BRSK1	6	54373096	54377346	-	NaN	BRSK1	ENSSSCG00000003287	Uncharacterized protein [Source:UniProtKB/TrEMBL;Acc:F1RMR7]	gene	overlapping	0	-2.99805	-2.30222	-2.64773
BRWD3	X	73863914	74026292	-	NaN	BRWD3	ENSSSCG00000025156	bromodomain and WD repeat domain containing 3 [Source:HGNC Symbol;Acc:17342]	gene	overlapping	0	2.9694	4.0842	4.89471
BSDC1	6	82782946	82808253	-	NaN	BSDC1	ENSSSCG00000026392	BSD domain containing 1 [Source:HGNC Symbol;Acc:25501]	gene	overlapping	0	2.69286	1.82866	0.529876
BSN	13	35341704	35375711	+	NaN	BSN	ENSSSCG00000011384	Uncharacterized protein [Source:UniProtKB/TrEMBL;Acc:F1SPS8]	gene	overlapping	0	-0.00355504	-2.30222	-2.64773
BSND	6	145489573	145496027	-	NaN	BSND	ENSSSCG00000020989	Bartter syndrome, infantile, with sensorineural deafness (Barttin) [Source:HGNC Symbol;Acc:16512]	gene	overlapping	0	-2.99805	-2.30222	-2.64773
BSPH1	6	49131065	49151552	-	NaN	BSPH1	ENSSSCG00000003123	Uncharacterized protein [Source:UniProtKB/TrEMBL;Acc:F1RLA4]	gene	overlapping	0	-2.99805	-2.30222	-2.64773
BST1	8	10659177	10694532	+	NaN	BST1	ENSSSCG00000028359	bone marrow stromal cell antigen 1 [Source:HGNC Symbol;Acc:1118]	gene	overlapping	0	-2.94738	-2.25156	-2.1624
BSX	9	55250827	55254625	-	NaN	BSX	ENSSSCG00000015139	Uncharacterized protein [Source:UniProtKB/TrEMBL;Acc:F1S9Q4]	gene	overlapping	0	-2.99805	-2.30222	-2.64773
BTAF1	14	113060230	113153588	+	NaN	BTAF1	ENSSSCG00000010467	Uncharacterized protein [Source:UniProtKB/TrEMBL;Acc:F1SCA0]	gene	overlapping	0	5.35923	5.00436	5.21857
BTBD1	7	57365867	57412706	+	NaN	BTBD1	ENSSSCG00000001801	Uncharacterized protein [Source:UniProtKB/TrEMBL;Acc:F1RIB2]	gene	overlapping	0	0.0722484	1.47323	1.50743
BTBD10	2	49163323	49215258	-	NaN	BTBD10	ENSSSCG00000013395	Uncharacterized protein [Source:UniProtKB/TrEMBL;Acc:F1S980]	gene	overlapping	0	2.72386	3.94952	3.99501
BTBD11	5	12541450	12922450	-	NaN	BTBD11	ENSSSCG00000000162	Uncharacterized protein [Source:UniProtKB/TrEMBL;Acc:F1SPR7]	gene	overlapping	0	-2.99805	-2.30222	-2.64773
BTBD16	14	143144544	143200589	+	NaN	BTBD16	ENSSSCG00000010701	Uncharacterized protein [Source:UniProtKB/TrEMBL;Acc:F1SEH6]	gene	overlapping	0	-2.17341	-2.30222	-2.64773
BTBD17	12	6737974	6741166	+	NaN	BTBD17	ENSSSCG00000026789	BTB (POZ) domain containing 17 [Source:HGNC Symbol;Acc:33758]	gene	overlapping	0	-2.99805	-2.30222	-2.26373
BTBD18	2	12852988	12860528	+	NaN	BTBD18	ENSSSCG00000013175	Uncharacterized protein [Source:UniProtKB/TrEMBL;Acc:F1SJY4]	gene	overlapping	0	-2.99805	-1.25156	-2.64773
BTBD19	6	154053417	154060177	+	NaN	TMEM53	ENSSSCG00000027423	transmembrane protein 53 [Source:HGNC Symbol;Acc:26186]	gene	overlapping	0	-0.204443	-2.30222	-2.59706
BTBD2	2	77259222	77264841	+	NaN	BTBD2	ENSSSCG00000013444	Uncharacterized protein [Source:UniProtKB/TrEMBL;Acc:F1SDH6]	gene	overlapping	0	4.31306	3.67873	-0.665111
BTBD3	17	23453847	23462854	+	NaN	BTBD3	ENSSSCG00000020853	Uncharacterized protein [Source:UniProtKB/TrEMBL;Acc:F1SBK0]	gene	overlapping	0	6.68615	5.302	5.56848
BTBD7	7	121202678	121260967	-	NaN	BTBD7	ENSSSCG00000002461	Uncharacterized protein [Source:UniProtKB/TrEMBL;Acc:F1SD53]	gene	overlapping	0	3.64861	4.14642	4.39148
BTC	8	74806489	74824445	+	NaN	BTC	ENSSSCG00000008965	Uncharacterized protein [Source:UniProtKB/TrEMBL;Acc:F1RYW5]	gene	overlapping	0	-2.99805	-2.30222	-2.64773
BTF3	2	84262050	84269834	-	NaN	BTF3	ENSSSCG00000014071	basic transcription factor 3 [Source:HGNC Symbol;Acc:1125]	gene	overlapping	0	6.12428	5.74316	6.28519
BTF3	2	150664569	150665149	-	NaN	ARHGAP26	ENSSSCG00000014399	Uncharacterized protein [Source:UniProtKB/TrEMBL;Acc:F1RM37]	gene	overlapping	0	-2.99805	-2.30222	-2.64773
BTF3L4	6	147835494	147835739	+	NaN	BTF3L4	ENSSSCG00000003866	basic transcription factor 3-like 4 [Source:HGNC Symbol;Acc:30547]	gene	overlapping	0	1.6462	1.72288	0.479208
BTG3_PIG	13	192359274	192373116	-	NaN	BTG3	ENSSSCG00000012014	Protein BTG3 [Source:UniProtKB/Swiss-Prot;Acc:A4UTQ2]	gene	overlapping	0	2.94592	2.92979	2.79497
BTG4	9	44183058	44194112	+	NaN	BTG4	ENSSSCG00000015020	Uncharacterized protein [Source:UniProtKB/TrEMBL;Acc:F1SUZ9]	gene	overlapping	0	-2.99805	-2.30222	-1.66128
BTN1A1	7	22015206	22020463	+	NaN	BTN1A1	ENSSSCG00000001132	Uncharacterized protein [Source:UniProtKB/TrEMBL;Acc:F1RQB0]	gene	overlapping	0	-2.94738	-2.30222	-1.54042
BTNL2	7	28877934	28894516	-	NaN	ENSSSCG00000001451	ENSSSCG00000001451	Uncharacterized protein [Source:UniProtKB/TrEMBL;Acc:F1RQ41]	gene	overlapping	0	-2.99805	-2.30222	-2.64773
BTNL2	7	29004822	29018452	-	NaN	BTNL2	ENSSSCG00000020713	Uncharacterized protein [Source:UniProtKB/TrEMBL;Acc:F1RQ42]	gene	overlapping	0	-2.99805	-2.30222	-2.64773
BTNL9	2	159560626	159577201	-	NaN	BTNL9	ENSSSCG00000028567	butyrophilin-like 9 [Source:HGNC Symbol;Acc:24176]	gene	overlapping	0	-2.99805	-2.30222	-2.64773
BTRC	14	122141902	122331392	+	NaN	BTRC	ENSSSCG00000010563	Uncharacterized protein [Source:UniProtKB/TrEMBL;Acc:F1S8U2]	gene	overlapping	0	6.60973	5.88696	6.86672
BUB1B	1	146236241	146249502	-	NaN	BUB1B	ENSSSCG00000004782	Uncharacterized protein [Source:UniProtKB/TrEMBL;Acc:F1SS31]	gene	overlapping	0	1.47008	3.19785	3.55484
BUB1B	1	146304943	146312662	+	NaN	BUB1B	ENSSSCG00000030580	budding uninhibited by benzimidazoles 1 homolog beta (yeast) [Source:HGNC Symbol;Acc:1149]	gene	overlapping	0	0.773694	2.59631	3.08314
BUB3	14	144290016	144302218	+	NaN	BUB3	ENSSSCG00000010726	Uncharacterized protein [Source:UniProtKB/TrEMBL;Acc:F2Z5F3]	gene	overlapping	0	4.72921	5.50344	5.49544
BUD13	9	49208934	49239224	-	NaN	BUD13	ENSSSCG00000015065	Uncharacterized protein [Source:UniProtKB/TrEMBL;Acc:F1SJV0]	gene	overlapping	0	3.83898	3.66822	4.78578
BUD31	3	6693615	6699273	-	NaN	ENSSSCG00000007622	ENSSSCG00000007622	Uncharacterized protein [Source:UniProtKB/TrEMBL;Acc:F1RNS9]	gene	overlapping	0	3.84227	4.43319	4.78505
BYSL	7	42476727	42486414	+	NaN	BYSL	ENSSSCG00000001631	bystin-like [Source:HGNC Symbol;Acc:1157]	gene	overlapping	0	-0.261085	-0.709578	0.266072
BZRAP1	12	36206786	36231739	+	NaN	BZRAP1	ENSSSCG00000017638	Uncharacterized protein [Source:UniProtKB/TrEMBL;Acc:F1RRP0]	gene	overlapping	0	-2.99805	-2.30222	-1.73541
C10orf10	14	99354180	99354806	+	NaN	RASSF4	ENSSSCG00000029662	ras association domain-containing protein 4 [Source:RefSeq peptide;Acc:NP_001230266]	gene	overlapping	0	-2.99805	-2.30222	-2.64773
C10orf107	14	70171070	70197351	+	NaN	C10orf107	ENSSSCG00000010218	chromosome 10 open reading frame 107 [Source:HGNC Symbol;Acc:28678]	gene	overlapping	0	-2.99805	-2.25156	-2.64773
C10ORF116	14	95320883	95323105	+	NaN	C10ORF116	ENSSSCG00000026923	Uncharacterized protein [Source:UniProtKB/TrEMBL;Acc:F1SEN4]	gene	overlapping	0	-2.99805	-2.30222	-2.64773
C10ORF118	14	135593211	135641867	-	NaN	C10ORF118	ENSSSCG00000010648	Uncharacterized protein [Source:UniProtKB/TrEMBL;Acc:F1S5H4]	gene	overlapping	0	6.80288	6.98788	7.61757
C10ORF12	14	118065019	118068750	+	NaN	C10ORF12	ENSSSCG00000010513	Uncharacterized protein [Source:UniProtKB/TrEMBL;Acc:F1S8Y9]	gene	overlapping	0	1.12292	1.96786	2.20416
C10ORF122	14	146602222	146617391	-	NaN	C10ORF122	ENSSSCG00000010740	Uncharacterized protein [Source:UniProtKB/TrEMBL;Acc:F1SDM9]	gene	overlapping	0	-2.99805	-2.30222	-2.64773
C10ORF125	14	153788686	153792982	+	NaN	C10ORF125	ENSSSCG00000010791	Uncharacterized protein [Source:UniProtKB/TrEMBL;Acc:F1SAC0]	gene	overlapping	0	-1.38194	0.938708	-2.06874
C10ORF137	14	146650251	146714946	+	NaN	C10ORF137	ENSSSCG00000010741	Uncharacterized protein [Source:UniProtKB/TrEMBL;Acc:F1SDM8]	gene	overlapping	0	4.13344	3.59419	4.1262
C10orf140	10	59048139	59050862	+	NaN	C10orf140	ENSSSCG00000011087	chromosome 10 open reading frame 140 [Source:HGNC Symbol;Acc:32697]	gene	overlapping	0	-0.118252	-2.25156	-0.364957
C10orf2	14	121755345	121760818	+	NaN	C10orf2	ENSSSCG00000030428	chromosome 10 open reading frame 2 [Source:HGNC Symbol;Acc:1160]	gene	overlapping	0	3.39829	3.76541	4.78264
C10ORF26	14	123734114	123768251	+	NaN	C10ORF26	ENSSSCG00000029594	Uncharacterized protein [Source:UniProtKB/TrEMBL;Acc:F1S851]	gene	overlapping	0	4.42175	4.54557	3.81192
C10ORF27	14	79531077	79543387	-	NaN	C10ORF27	ENSSSCG00000010273	Uncharacterized protein [Source:UniProtKB/TrEMBL;Acc:F1SUB4]	gene	overlapping	0	-2.99805	-2.30222	-2.64773
C10ORF28	14	118887670	118980917	+	NaN	C10ORF28	ENSSSCG00000010531	Uncharacterized protein [Source:UniProtKB/TrEMBL;Acc:F1S8X1]	gene	overlapping	0	4.16003	3.64954	3.76078
C10orf46	14	140199114	140220495	-	NaN	C10orf46	ENSSSCG00000030019	chromosome 10 open reading frame 46 [Source:HGNC Symbol;Acc:23727]	gene	overlapping	0	-1.45607	-0.0194479	-0.967408
C10ORF46	14	140327293	140346983	+	NaN	C10ORF46	ENSSSCG00000010676	Uncharacterized protein [Source:UniProtKB/TrEMBL;Acc:F1S4Q0]	gene	overlapping	0	-2.07207	-0.83558	-0.205607
C10orf47	10	65735078	65761252	-	NaN	C10orf47	ENSSSCG00000022247	chromosome 10 open reading frame 47 [Source:HGNC Symbol;Acc:23728]	gene	overlapping	0	1.19241	1.11023	0.657415
C10ORF53	14	98085624	98094879	+	NaN	C10ORF53	ENSSSCG00000010393	Uncharacterized protein [Source:UniProtKB/TrEMBL;Acc:F1SDW7]	gene	overlapping	0	-2.99805	-2.30222	-2.64773
C10ORF54	14	80559386	80584461	-	NaN	CDH23	ENSSSCG00000010278	Uncharacterized protein [Source:UniProtKB/TrEMBL;Acc:F1SUA7]	gene	overlapping	0	-2.99805	-2.30222	-2.64773
C10orf57	14	88542475	88551614	-	NaN	C10orf57	ENSSSCG00000024300	chromosome 10 open reading frame 57 [Source:HGNC Symbol;Acc:25804]	gene	overlapping	0	2.11241	3.21425	2.588
C10orf67	10	57355457	57438800	+	NaN	C10orf67	ENSSSCG00000021093	chromosome 10 open reading frame 67 [Source:HGNC Symbol;Acc:28716]	gene	overlapping	0	-2.94738	-0.861581	-1.44392
C10ORF71	14	97820534	97824823	+	NaN	C10ORF71	ENSSSCG00000010389	Uncharacterized protein [Source:UniProtKB/TrEMBL;Acc:F1SEJ4]	gene	overlapping	0	-2.99805	-2.30222	-2.64773
C10ORF76	14	122727505	122924928	-	NaN	C10ORF76	ENSSSCG00000010571	Uncharacterized protein [Source:UniProtKB/TrEMBL;Acc:F1S8T4]	gene	overlapping	0	1.20556	3.59132	3.96385
C10ORF82	14	138161932	138168373	-	NaN	C10ORF82	ENSSSCG00000010663	Uncharacterized protein [Source:UniProtKB/TrEMBL;Acc:F1S4S4]	gene	overlapping	0	-2.99805	-2.30222	-2.64773
C10ORF90	14	147439200	147522405	-	NaN	C10ORF90	ENSSSCG00000010747	Uncharacterized protein [Source:UniProtKB/TrEMBL;Acc:F1SDM2]	gene	overlapping	0	-1.14994	-1.58489	-2.21306
C10ORF96	14	137796901	137846673	+	NaN	C10ORF96	ENSSSCG00000010656	Uncharacterized protein [Source:UniProtKB/TrEMBL;Acc:F1S4U1]	gene	overlapping	0	1.43474	-1.2651	-1.01808
C11ORF1	9	44420374	44425460	+	NaN	C11ORF1	ENSSSCG00000015024	Uncharacterized protein [Source:UniProtKB/TrEMBL;Acc:F1SMC9]	gene	overlapping	0	-2.99805	-1.47758	-2.26373
C11ORF10	2	9237373	9241262	-	NaN	C11ORF10	ENSSSCG00000027538	Uncharacterized protein; Uncharacterized protein [Source:UniProtKB/TrEMBL;Acc:F2Z526]	gene	overlapping	0	5.3291	4.85283	5.2373
C11ORF2	2	6213604	6226834	-	NaN	C11ORF2	ENSSSCG00000013005	Uncharacterized protein [Source:UniProtKB/TrEMBL;Acc:F1RQT6]	gene	overlapping	0	4.51769	3.45836	3.13641
C11orf20	2	6881439	6883031	-	NaN	C11orf20	ENSSSCG00000013027	chromosome 11 open reading frame 20 [Source:HGNC Symbol;Acc:19231]	gene	overlapping	0	-2.99805	-2.25156	-2.64773
C11ORF24	2	3247137	3257948	+	NaN	C11ORF24	ENSSSCG00000012886	Uncharacterized protein [Source:UniProtKB/TrEMBL;Acc:F1RVQ3]	gene	overlapping	0	3.37715	1.88639	-0.2441
C11ORF30	9	11731924	11824724	+	NaN	C11ORF30	ENSSSCG00000014868	Uncharacterized protein [Source:UniProtKB/TrEMBL;Acc:F1SUL3]	gene	overlapping	0	3.35486	2.84834	2.57793
C11orf35	2	346489	350650	+	NaN	C11orf35	ENSSSCG00000030137	chromosome 11 open reading frame 35 [Source:HGNC Symbol;Acc:28561]	gene	overlapping	0	-2.99805	-2.30222	-2.64773
C11ORF41	2	29617747	29746715	+	NaN	C11ORF41	ENSSSCG00000013311	Uncharacterized protein [Source:UniProtKB/TrEMBL;Acc:F1SGR4]	gene	overlapping	0	-2.94738	-0.111959	-2.64773
C11ORF42	9	4083214	4088183	+	NaN	C11ORF42	ENSSSCG00000014634	Uncharacterized protein [Source:UniProtKB/TrEMBL;Acc:F1RML9]	gene	overlapping	0	-2.99805	-2.30222	-2.64773
C11ORF46	2	125117819	125122073	+	NaN	C11ORF46	ENSSSCG00000014222	Uncharacterized protein [Source:UniProtKB/TrEMBL;Acc:F1RLE2]	gene	overlapping	0	1.51821	-1.91822	-2.64773
C11ORF49	2	16626709	16836642	-	NaN	C11ORF49	ENSSSCG00000013246	Uncharacterized protein [Source:UniProtKB/TrEMBL;Acc:F1SIB8]	gene	overlapping	0	-2.99805	-2.30222	-2.64773
C11orf51	9	7446498	7450297	-	NaN	LRTOMT	ENSSSCG00000014805	leucine rich transmembrane and 0-methyltransferase domain containing [Source:HGNC Symbol;Acc:25033]	gene	overlapping	0	4.02668	3.63901	2.84166
C11orf52	9	44438433	44445766	+	NaN	C11orf52	ENSSSCG00000015035	chromosome 11 open reading frame 52 [Source:HGNC Symbol;Acc:30531]	gene	overlapping	0	-2.99805	-2.30222	-2.64773
C11ORF53	9	43925950	43952900	-	NaN	C11ORF53	ENSSSCG00000015018	Uncharacterized protein [Source:UniProtKB/TrEMBL;Acc:F1SV01]	gene	overlapping	0	-2.99805	-2.30222	-2.64773
C11ORF54	9	29809961	29821183	+	NaN	C11ORF54	ENSSSCG00000014948	Uncharacterized protein [Source:UniProtKB/TrEMBL;Acc:F1STK8]	gene	overlapping	0	3.46687	3.03075	4.46619
C11orf57	9	44617277	44627870	+	NaN	C11orf57	ENSSSCG00000015044	chromosome 11 open reading frame 57 [Source:HGNC Symbol;Acc:25569]	gene	overlapping	0	2.56684	2.57776	2.8791
C11ORF58	2	45426741	45465694	-	NaN	C11ORF58	ENSSSCG00000013383	Uncharacterized protein [Source:UniProtKB/TrEMBL;Acc:F1S994]	gene	overlapping	0	5.68315	6.18754	6.64708
C11ORF61	9	57513315	57543826	-	NaN	C11ORF61	ENSSSCG00000015201	Uncharacterized protein [Source:UniProtKB/TrEMBL;Acc:F1S797]	gene	overlapping	0	-1.70173	-0.37027	-1.2441
C11ORF63	9	55172134	55233170	+	NaN	C11ORF63	ENSSSCG00000015138	Uncharacterized protein [Source:UniProtKB/TrEMBL;Acc:F1S9Q5]	gene	overlapping	0	-2.99805	-1.91822	-1.9304
C11ORF65	9	40955240	40995796	-	NaN	C11ORF65	ENSSSCG00000015008	Uncharacterized protein [Source:UniProtKB/TrEMBL;Acc:F1SV19]	gene	overlapping	0	-0.686929	-1.67257	0.375227
C11ORF67	9	13640801	13643600	+	NaN	C11ORF67	ENSSSCG00000014883	Uncharacterized protein [Source:UniProtKB/TrEMBL;Acc:F1STY7]	gene	overlapping	0	0.392034	-1.91822	-1.29477
C11ORF68	2	5515886	5518146	+	NaN	C11ORF68	ENSSSCG00000012966	Uncharacterized protein [Source:UniProtKB/TrEMBL;Acc:F1RU27]	gene	overlapping	0	1.62242	-0.288566	0.604007
C11ORF70	9	36714889	36744705	+	NaN	C11ORF70	ENSSSCG00000014980	Uncharacterized protein [Source:UniProtKB/TrEMBL;Acc:F1SV73]	gene	overlapping	0	-0.560054	-1.67257	-2.64773
C11ORF73	9	22493189	22501615	-	NaN	C11ORF73	ENSSSCG00000021210	Uncharacterized protein [Source:UniProtKB/TrEMBL;Acc:F1STS6]	gene	overlapping	0	3.09982	3.6971	4.4463
C11orf80	2	4615256	4674876	-	NaN	C11orf80	ENSSSCG00000029902	chromosome 11 open reading frame 80 [Source:HGNC Symbol;Acc:26197]	gene	overlapping	0	-2.89672	0.370527	-2.26373
C11ORF82	9	18876947	18896503	-	NaN	C11ORF82	ENSSSCG00000014898	Uncharacterized protein [Source:UniProtKB/TrEMBL;Acc:F1STW1]	gene	overlapping	0	2.92244	3.66835	3.56937
C11orf83	2	8423618	8424305	-	NaN	C11orf83	ENSSSCG00000024995	chromosome 11 open reading frame 83 [Source:HGNC Symbol;Acc:34399]	gene	overlapping	0	1.15489	0.847897	1.5115
C11ORF84	2	7464512	7506772	-	NaN	C11ORF84	ENSSSCG00000013048	Uncharacterized protein [Source:UniProtKB/TrEMBL;Acc:F1RPY8]	gene	overlapping	0	-0.252261	0.0643984	2.22883
C11ORF86	2	4350835	4351810	+	NaN	C11ORF86	ENSSSCG00000025443	Uncharacterized protein [Source:UniProtKB/TrEMBL;Acc:F1RUV7]	gene	overlapping	0	-2.99805	-2.30222	-2.64773
C11ORF86	2	4514069	4515044	-	NaN	C11ORF86	ENSSSCG00000028474	Uncharacterized protein [Source:UniProtKB/TrEMBL;Acc:F1RUV7]	gene	overlapping	0	-2.99805	-2.30222	-2.64773
C11ORF87	9	42088460	42089056	-	NaN	C11ORF87	ENSSSCG00000015012	Uncharacterized protein [Source:UniProtKB/TrEMBL;Acc:F1SV15]	gene	overlapping	0	-2.99805	-2.25156	-2.64773
C11ORF88	9	44142532	44165505	-	NaN	C11ORF88	ENSSSCG00000015021	Uncharacterized protein [Source:UniProtKB/TrEMBL;Acc:F1SUZ8]	gene	overlapping	0	-2.99805	-1.09358	-2.64773
C11ORF9	2	9314394	9332126	-	NaN	C11ORF9	ENSSSCG00000013078	Uncharacterized protein [Source:UniProtKB/TrEMBL;Acc:F1RKR3]	gene	overlapping	0	0.210594	-2.25156	-2.21306
C11ORF91	2	29768913	29770663	-	NaN	C11ORF91	ENSSSCG00000013310	Uncharacterized protein [Source:UniProtKB/TrEMBL;Acc:F1SGR5]	gene	overlapping	0	-2.99805	-2.30222	-2.64773
C11ORF93	9	43906148	43909875	-	NaN	C11ORF93	ENSSSCG00000015019	Uncharacterized protein [Source:UniProtKB/TrEMBL;Acc:F1SV00]	gene	overlapping	0	-2.41906	-2.30222	-2.64773
C11ORF94	2	17949621	17950315	-	NaN	MAPK8IP1	ENSSSCG00000013269	Uncharacterized protein [Source:UniProtKB/TrEMBL;Acc:F1SHK0]	gene	overlapping	0	-2.61405	-2.30222	-2.21306
C12ORF10	5	18952922	18961608	+	NaN	C12ORF10	ENSSSCG00000000267	Uncharacterized protein [Source:UniProtKB/TrEMBL;Acc:F1SFR1]	gene	overlapping	0	2.49934	2.05345	2.10248
C12ORF12	5	96363644	96364864	+	NaN	C12ORF12	ENSSSCG00000000919	Uncharacterized protein [Source:UniProtKB/TrEMBL;Acc:F1SPZ7]	gene	overlapping	0	-2.99805	-2.30222	-2.64773
C12ORF23	5	13234050	13250894	-	NaN	C12ORF23	ENSSSCG00000000166	Uncharacterized protein [Source:UniProtKB/TrEMBL;Acc:F1SPQ3]	gene	overlapping	0	-1.84007	1.00971	0.437365
C12ORF26	5	104178673	104212910	+	NaN	CCDC59	ENSSSCG00000000942	coiled-coil domain containing 59 [Source:RefSeq peptide;Acc:NP_001230788]	gene	overlapping	0	0.971881	0.434742	1.00687
C12ORF32	5	69526435	69532789	-	NaN	C12ORF32	ENSSSCG00000000738	Uncharacterized protein [Source:UniProtKB/TrEMBL;Acc:F1SKA1]	gene	overlapping	0	2.97349	3.61187	4.6459
C12ORF34	14	43693025	43720090	-	NaN	C12ORF34	ENSSSCG00000009927	Uncharacterized protein [Source:UniProtKB/TrEMBL;Acc:F1RIT4]	gene	overlapping	0	-2.99805	-2.30222	-0.823088
C12ORF40	5	73761894	73831667	+	NaN	C12ORF40	ENSSSCG00000000782	Uncharacterized protein [Source:UniProtKB/TrEMBL;Acc:F1SHQ0]	gene	overlapping	0	1.78543	0.445747	1.97583
C12ORF41	5	82757351	82779984	+	NaN	C12ORF41	ENSSSCG00000000842	Uncharacterized protein [Source:UniProtKB/TrEMBL;Acc:F1SG39]	gene	overlapping	0	3.95548	3.71055	4.88111
C12ORF43	14	43399821	43413454	-	NaN	HNF1A	ENSSSCG00000009919	hepatocyte nuclear factor 1-alpha [Source:RefSeq peptide;Acc:NP_001027560]	gene	overlapping	0	0.847558	1.01373	2.32985
C12orf45	5	82962984	82975482	-	NaN	C12orf45	ENSSSCG00000027792	chromosome 12 open reading frame 45 [Source:HGNC Symbol;Acc:28628]	gene	overlapping	0	1.99147	2.60283	2.66691
C12ORF48	5	85946496	86067179	-	NaN	C12ORF48	ENSSSCG00000000859	Uncharacterized protein [Source:UniProtKB/TrEMBL;Acc:F1SRJ5]	gene	overlapping	0	0.45725	0.906421	2.66822
C12ORF49	14	37909954	37926294	+	NaN	C12ORF49	ENSSSCG00000009863	Uncharacterized protein [Source:UniProtKB/TrEMBL;Acc:F1RKE3]	gene	overlapping	0	1.91227	1.29042	2.03427
C12ORF5	5	68266578	68280421	-	NaN	C12ORF5	ENSSSCG00000024219	Uncharacterized protein [Source:UniProtKB/TrEMBL;Acc:F1SKZ0]	gene	overlapping	0	5.18861	5.31207	5.49065
C12ORF50	5	99182245	99207198	+	NaN	C12ORF50	ENSSSCG00000000924	Uncharacterized protein [Source:UniProtKB/TrEMBL;Acc:F1SPZ2]	gene	overlapping	0	-2.61405	-2.30222	-2.64773
C12ORF51	14	41961392	42041398	+	NaN	C12ORF51	ENSSSCG00000009885	Uncharacterized protein [Source:UniProtKB/TrEMBL;Acc:F1RJM5]	gene	overlapping	0	1.5043	2.67431	2.32732
C12ORF52	14	41123972	41129750	+	NaN	C12ORF52	ENSSSCG00000009878	Uncharacterized protein [Source:UniProtKB/TrEMBL;Acc:F1RKB0]	gene	overlapping	0	2.19554	0.892874	0.284221
C12ORF53	5	66427504	66551473	+	NaN	C12ORF53	ENSSSCG00000000692	Uncharacterized protein [Source:UniProtKB/TrEMBL;Acc:F1SLT0]	gene	overlapping	0	-2.61405	-2.30222	-2.64773
C12orf54	5	82299079	82312643	+	NaN	C12orf54	ENSSSCG00000030501	chromosome 12 open reading frame 54 [Source:HGNC Symbol;Acc:28553]	gene	overlapping	0	-2.99805	-2.30222	-2.64773
C12ORF56	5	31898374	31974404	+	NaN	C12ORF56	ENSSSCG00000000464	Uncharacterized protein [Source:UniProtKB/TrEMBL;Acc:F1SKB7]	gene	overlapping	0	-0.122739	0.226207	-2.64773
C12ORF60	5	61123957	61124688	-	NaN	C12ORF60	ENSSSCG00000000609	Uncharacterized protein [Source:UniProtKB/TrEMBL;Acc:F1SQV5]	gene	overlapping	0	-2.99805	-2.30222	-2.64773
C12ORF65	14	31335693	31338191	-	NaN	C12ORF65	ENSSSCG00000009774	Uncharacterized protein [Source:UniProtKB/TrEMBL;Acc:F1RFL3]	gene	overlapping	0	-1.13629	0.118898	-0.463754
C12ORF66	5	32012009	32033452	+	NaN	C12ORF66	ENSSSCG00000030352	Uncharacterized protein [Source:UniProtKB/TrEMBL;Acc:F1SKB6]	gene	overlapping	0	0.53038	1.96694	-0.772421
C12ORF69	5	61135594	61136271	+	NaN	C12ORF69	ENSSSCG00000000610	Uncharacterized protein [Source:UniProtKB/TrEMBL;Acc:F1SQV4]	gene	overlapping	0	-2.99805	-2.30222	-2.64773
C12ORF70	5	49802585	49832349	-	NaN	C12ORF70	ENSSSCG00000000550	Uncharacterized protein [Source:UniProtKB/TrEMBL;Acc:F1SG82]	gene	overlapping	0	-2.99805	-2.30222	-2.64773
C13ORF33	11	7396534	7414732	+	NaN	C13ORF33	ENSSSCG00000009331	Uncharacterized protein [Source:UniProtKB/TrEMBL;Acc:F1RST4]	gene	overlapping	0	-1.50674	-2.25156	-2.64773
C14ORF101	1	206440694	206505468	+	NaN	C14ORF101	ENSSSCG00000005062	Uncharacterized protein [Source:UniProtKB/TrEMBL;Acc:F1SSM4]	gene	overlapping	0	1.25768	1.45437	1.39064
C14ORF102	7	118609313	118657772	-	NaN	PSMC1	ENSSSCG00000002433	proteasome (prosome, macropain) 26S subunit, ATPase, 1 [Source:RefSeq peptide;Acc:NP_001231080]	gene	overlapping	0	0.356581	0.573088	1.74063
C14ORF105	1	207166637	207202262	-	NaN	C14ORF105	ENSSSCG00000005067	Uncharacterized protein [Source:UniProtKB/TrEMBL;Acc:F1SSL9]	gene	overlapping	0	-2.99805	-2.30222	-2.64773
C14ORF119	7	81284415	81284843	-	NaN	C14ORF119	ENSSSCG00000002035	Uncharacterized protein [Source:UniProtKB/TrEMBL;Acc:F1S9D0]	gene	overlapping	0	0.122916	0.147243	-2.5464
C14ORF126	7	72987129	72997931	+	NaN	C14ORF126	ENSSSCG00000026663	Uncharacterized protein [Source:UniProtKB/TrEMBL;Acc:F1SHF8]	gene	overlapping	0	2.12504	3.89602	4.11749
C14ORF133	7	106449284	106472504	+	NaN	C14ORF133	ENSSSCG00000002403	Uncharacterized protein [Source:UniProtKB/TrEMBL;Acc:F1SE09]	gene	overlapping	0	1.23023	1.61618	2.56216
C14ORF135	1	210243302	210276706	+	NaN	C14ORF135	ENSSSCG00000005082	Uncharacterized protein [Source:UniProtKB/TrEMBL;Acc:F1SSI4]	gene	overlapping	0	3.20492	2.70707	3.19739
C14ORF153	7	130869565	130891073	-	NaN	C14ORF153	ENSSSCG00000002547	Uncharacterized protein [Source:UniProtKB/TrEMBL;Acc:F1S9W8]	gene	overlapping	0	2.22189	2.66822	2.73771
C14ORF159	7	119404956	119444055	+	NaN	C14ORF159	ENSSSCG00000002438	Uncharacterized protein [Source:UniProtKB/TrEMBL;Acc:F1SDA2]	gene	overlapping	0	-2.99805	-2.30222	-2.64773
C14orf164	7	80925214	80928414	+	NaN	C14orf164	ENSSSCG00000026237	chromosome 14 open reading frame 164 [Source:HGNC Symbol;Acc:20438]	gene	overlapping	0	-2.99805	-2.30222	-2.64773
C14ORF166B	7	106005464	106033717	+	NaN	C14ORF166B	ENSSSCG00000002391	Uncharacterized protein [Source:UniProtKB/TrEMBL;Acc:F1S2N5]	gene	overlapping	0	-2.99805	-2.30222	-2.64773
C14ORF2	7	131028040	131033988	-	NaN	C14ORF2	ENSSSCG00000002550	Uncharacterized protein [Source:UniProtKB/TrEMBL;Acc:F1S9V7]	gene	overlapping	0	5.34128	5.69694	6.18239
C14ORF21	7	80254849	80263078	-	NaN	CIDEB	ENSSSCG00000001989	cell-death-inducing DNA-fragmentation-factor-like effector B [Source:RefSeq peptide;Acc:NP_001106158]	gene	overlapping	0	1.86671	3.39968	4.4775
C14orf38	1	209647815	209714640	-	NaN	C14orf38	ENSSSCG00000027678	chromosome 14 open reading frame 38 [Source:HGNC Symbol;Acc:19847]	gene	overlapping	0	-2.99805	-2.30222	-2.64773
C14ORF39	1	210529079	210535883	-	NaN	C14ORF39	ENSSSCG00000005085	Uncharacterized protein [Source:UniProtKB/TrEMBL;Acc:F1SSI0]	gene	overlapping	0	-2.99805	-2.30222	-2.21306
C14ORF43	7	102828131	102831810	-	NaN	C14ORF43	ENSSSCG00000002350	Uncharacterized protein [Source:UniProtKB/TrEMBL;Acc:F1S3I8]	gene	overlapping	0	4.2805	3.02542	1.183
C14ORF45	7	103070839	103114503	+	NaN	C14ORF45	ENSSSCG00000002356	Uncharacterized protein [Source:UniProtKB/TrEMBL;Acc:F1S3H2]	gene	overlapping	0	-2.99805	-2.30222	-2.64773
C14ORF49	7	123887451	123943922	-	NaN	C14ORF49	ENSSSCG00000002495	Uncharacterized protein [Source:UniProtKB/TrEMBL;Acc:F1SAR6]	gene	overlapping	0	-2.94738	0.0892335	-1.2441
C15ORF23	1	146003035	146014929	-	NaN	C15ORF23	ENSSSCG00000004775	Uncharacterized protein [Source:UniProtKB/TrEMBL;Acc:F1SSR3]	gene	overlapping	0	-2.61405	0.388016	-1.15642
C15ORF33	1	135810194	135906879	+	NaN	C15ORF33	ENSSSCG00000004648	Uncharacterized protein [Source:UniProtKB/TrEMBL;Acc:F1SQG9]	gene	overlapping	0	-2.99805	-2.30222	-2.64773
C15ORF39	7	63069364	63074802	-	NaN	C15ORF39	ENSSSCG00000001885	Uncharacterized protein [Source:UniProtKB/TrEMBL;Acc:F1SJ54]	gene	overlapping	0	3.29245	2.99261	4.41248
C15ORF40	7	57417819	57425005	+	NaN	C15ORF40	ENSSSCG00000030131	Uncharacterized protein [Source:UniProtKB/TrEMBL;Acc:F1RIB1]	gene	overlapping	0	1.93167	2.51448	2.78195
C15orf41	1	150143394	150211065	-	NaN	C15orf41	ENSSSCG00000026900	chromosome 15 open reading frame 41 [Source:HGNC Symbol;Acc:26929]	gene	overlapping	0	0.997746	-0.583407	-0.169969
C15ORF43	1	141338889	141367297	-	NaN	C15ORF43	ENSSSCG00000004680	Uncharacterized protein [Source:UniProtKB/TrEMBL;Acc:F1SN26]	gene	overlapping	0	0.371568	-0.955233	0.5654
C15ORF44	1	181142702	181177488	-	NaN	C15ORF44	ENSSSCG00000004936	Uncharacterized protein [Source:UniProtKB/TrEMBL;Acc:F1SJK5]	gene	overlapping	0	2.26724	3.22433	3.30385
C15ORF48	1	140915692	140919335	+	NaN	C15ORF48	ENSSSCG00000004670	Uncharacterized protein [Source:UniProtKB/TrEMBL;Acc:F1SN46]	gene	overlapping	0	-2.17341	-2.25156	-2.06874
C15orf52	1	146059861	146065854	+	NaN	C15orf52	ENSSSCG00000023975	chromosome 15 open reading frame 52 [Source:HGNC Symbol;Acc:33488]	gene	overlapping	0	-2.99805	-1.72323	-2.64773
C15orf55	7	86147170	86157882	-	NaN	C15orf55	ENSSSCG00000002241	chromosome 15 open reading frame 55 [Source:HGNC Symbol;Acc:29919]	gene	overlapping	0	-1.84007	-1.20089	-2.64773
C15ORF58	7	60659900	60669602	+	NaN	C15ORF58	ENSSSCG00000001859	Uncharacterized protein [Source:UniProtKB/TrEMBL;Acc:F1SJX4]	gene	overlapping	0	-0.543751	0.0878615	1.80254
C15ORF59	7	64342172	64354032	+	NaN	C15ORF59	ENSSSCG00000001916	Uncharacterized protein [Source:UniProtKB/TrEMBL;Acc:F1SIC7]	gene	overlapping	0	-2.99805	-2.30222	-2.64773
C15ORF60	7	64541622	64564587	-	NaN	C15ORF60	ENSSSCG00000001919	Uncharacterized protein [Source:UniProtKB/TrEMBL;Acc:F1SIC4]	gene	overlapping	0	-2.94738	-2.30222	-2.64773
C15ORF61	1	183126894	183131818	+	NaN	C15ORF61	ENSSSCG00000004954	Uncharacterized protein [Source:UniProtKB/TrEMBL;Acc:F1SJI8]	gene	overlapping	0	-2.61405	-2.30222	-2.64773
C15ORF62	1	145714630	145715157	-	NaN	PPP1R14D	ENSSSCG00000004760	protein phosphatase 1 regulatory subunit 14D [Source:RefSeq peptide;Acc:NP_001230639]	gene	overlapping	0	-2.99805	-2.30222	-2.64773
C15ORF63	1	142587865	142589341	-	NaN	C15ORF63	ENSSSCG00000004697	Uncharacterized protein [Source:UniProtKB/TrEMBL;Acc:F1SI83]	gene	overlapping	0	6.58431	6.54644	6.94926
C16ORF11	3	41256191	41258258	+	NaN	C16ORF11	ENSSSCG00000007989	Uncharacterized protein [Source:UniProtKB/TrEMBL;Acc:F1RGU4]	gene	overlapping	0	-2.99805	-2.30222	-2.64773
C16ORF42	3	41986783	41989258	-	NaN	C16ORF42	ENSSSCG00000008030	Uncharacterized protein [Source:UniProtKB/TrEMBL;Acc:F1RFZ6]	gene	overlapping	0	4.19145	3.67282	3.77896
C16orf54	3	18577366	18578031	+	NaN	C16orf54	ENSSSCG00000029752	chromosome 16 open reading frame 54 [Source:HGNC Symbol;Acc:26649]	gene	overlapping	0	-2.99805	-2.30222	-2.64773
C16ORF57	6	17904315	17921446	+	NaN	C16ORF57	ENSSSCG00000002807	Uncharacterized protein [Source:UniProtKB/TrEMBL;Acc:F1RFS6]	gene	overlapping	0	-1.21042	-0.268935	0.975833
C16ORF58	3	17341206	17348615	+	NaN	C16ORF58	ENSSSCG00000007753	Uncharacterized protein [Source:UniProtKB/TrEMBL;Acc:F1RIS7]	gene	overlapping	0	-2.99805	-2.30222	-1.32795
C16orf59	3	42635737	42639557	-	NaN	C16orf59	ENSSSCG00000008055	chromosome 16 open reading frame 59 [Source:HGNC Symbol;Acc:25849]	gene	overlapping	0	-2.99805	-2.30222	-2.64773
C16orf7	6	440204	451813	+	NaN	C16orf7	ENSSSCG00000022310	chromosome 16 open reading frame 7 [Source:HGNC Symbol;Acc:13526]	gene	overlapping	0	-2.99805	-2.30222	-2.64773
C16ORF71	3	38713870	38726368	-	NaN	C16ORF71	ENSSSCG00000007935	Uncharacterized protein [Source:UniProtKB/TrEMBL;Acc:F1RK72]	gene	overlapping	0	-2.99805	-2.30222	-2.64773
C16ORF72	X	130958421	130959251	+	NaN	C16ORF72	ENSSSCG00000012715	Uncharacterized protein [Source:UniProtKB/TrEMBL;Acc:F1RQ70]	gene	overlapping	0	-2.99805	-2.30222	-2.64773
C16ORF74	6	3518411	3520079	+	NaN	C16ORF74	ENSSSCG00000002662	Uncharacterized protein [Source:UniProtKB/TrEMBL;Acc:F1S6I4]	gene	overlapping	0	-2.99805	-2.30222	-2.64773
C16ORF79	3	42398619	42400072	-	NaN	MLST8	ENSSSCG00000008044	Uncharacterized protein [Source:UniProtKB/TrEMBL;Acc:F1RFA8]	gene	overlapping	0	-2.99805	-2.30222	-2.21306
C16ORF80	6	17978591	17993262	-	NaN	C16ORF80	ENSSSCG00000002805	Uncharacterized protein [Source:UniProtKB/TrEMBL;Acc:F2Z513]	gene	overlapping	0	2.89755	2.98109	4.0683
C16orf87	6	33099684	33107320	-	NaN	C16orf87	ENSSSCG00000022333	chromosome 16 open reading frame 87 [Source:HGNC Symbol;Acc:33754]	gene	overlapping	0	1.53784	0.48541	1.22758
C16ORF90	3	40121677	40123022	+	NaN	C16ORF90	ENSSSCG00000007957	Uncharacterized protein [Source:UniProtKB/TrEMBL;Acc:F1RK40]	gene	overlapping	0	-2.99805	-2.30222	-2.64773
C16orf91	3	42081891	42083512	-	NaN	C16orf91	ENSSSCG00000024405	chromosome 16 open reading frame 91 [Source:HGNC Symbol;Acc:27558]	gene	overlapping	0	2.2738	1.82459	3.40751
C16orf93	3	18082881	18087211	+	NaN	C16orf93	ENSSSCG00000007778	chromosome 16 open reading frame 93 [Source:HGNC Symbol;Acc:28078]	gene	overlapping	0	-2.99805	-2.30222	-1.44392
C16ORF95	6	2089651	2100933	+	NaN	C16ORF95	ENSSSCG00000002657	Uncharacterized protein [Source:UniProtKB/TrEMBL;Acc:F1S6J9]	gene	overlapping	0	-2.99805	-2.30222	-2.64773
C16ORF96	3	38847274	38856402	+	NaN	C16ORF96	ENSSSCG00000007940	Uncharacterized protein [Source:UniProtKB/TrEMBL;Acc:F1RK67]	gene	overlapping	0	-2.99805	-2.30222	-2.64773
C17orf101	12	32843	43829	-	NaN	C17orf101	ENSSSCG00000028156	chromosome 17 open reading frame 101 [Source:HGNC Symbol;Acc:26174]	gene	overlapping	0	-0.41758	0.926053	-1.40208
C17ORF104	12	18922197	18942867	+	NaN	C17ORF104	ENSSSCG00000017351	Uncharacterized protein [Source:UniProtKB/TrEMBL;Acc:F1RQZ6]	gene	overlapping	0	1.29086	-0.634075	0.334889
C17ORF105	12	19566979	19567510	-	NaN	C17ORF105	ENSSSCG00000017373	Uncharacterized protein [Source:UniProtKB/TrEMBL;Acc:F1S1I7]	gene	overlapping	0	-2.99805	-2.30222	-2.64773
C17ORF106	12	5386515	5399934	-	NaN	C17ORF106	ENSSSCG00000017194	Uncharacterized protein [Source:UniProtKB/TrEMBL;Acc:F1RW05]	gene	overlapping	0	0.0156067	-2.30222	-1.03025
C17ORF107	12	54082770	54083559	-	NaN	CHRNE	ENSSSCG00000017909	Uncharacterized protein [Source:UniProtKB/TrEMBL;Acc:F1RFW1]	gene	overlapping	0	-2.99805	-2.30222	-2.64773
C17ORF107	12	54290093	54290882	+	NaN	ENSSSCG00000026586	ENSSSCG00000026586	No description	gene	overlapping	0	-2.99805	-2.30222	-2.64773
C17orf109	12	5703918	5704513	-	NaN	C17orf109	ENSSSCG00000021627	chromosome 17 open reading frame 109 [Source:HGNC Symbol;Acc:40030]	gene	overlapping	0	-2.99805	-2.30222	-2.64773
C17ORF28	12	6275966	6295427	+	NaN	C17ORF28	ENSSSCG00000017219	Uncharacterized protein [Source:UniProtKB/TrEMBL;Acc:F1RVV6]	gene	overlapping	0	-1.59442	-1.47758	-1.82309
C17ORF46	12	18432685	18441597	+	NaN	C17ORF46	ENSSSCG00000017331	Uncharacterized protein [Source:UniProtKB/TrEMBL;Acc:F1RR24]	gene	overlapping	0	-2.99805	-2.30222	-2.64773
C17ORF47	12	36013793	36016106	+	NaN	C17ORF47	ENSSSCG00000017644	Uncharacterized protein [Source:UniProtKB/TrEMBL;Acc:F1RRN4]	gene	overlapping	0	-2.99805	-2.30222	-2.64773
C17ORF48	12	58063004	58075734	+	NaN	C17ORF48	ENSSSCG00000018009	Uncharacterized protein [Source:UniProtKB/TrEMBL;Acc:F1SS59]	gene	overlapping	0	4.34128	3.29154	3.07202
C17ORF49	12	54717498	54720452	-	NaN	C17ORF49	ENSSSCG00000017928	Uncharacterized protein [Source:UniProtKB/TrEMBL;Acc:F1RFR7]	gene	overlapping	0	1.70788	2.08786	2.28644
C17orf53	12	19339643	19346135	-	NaN	C17orf53	ENSSSCG00000017364	chromosome 17 open reading frame 53 [Source:HGNC Symbol;Acc:28460]	gene	overlapping	0	-0.701728	0.197911	0.422567
C17ORF57	12	16621157	16703822	-	NaN	C17ORF57	ENSSSCG00000017305	Uncharacterized protein [Source:UniProtKB/TrEMBL;Acc:F1RRU3]	gene	overlapping	0	-2.99805	-2.25156	-2.64773
C17orf59	12	55880279	55881343	-	NaN	C17orf59	ENSSSCG00000028788	chromosome 17 open reading frame 59 [Source:HGNC Symbol;Acc:25939]	gene	overlapping	0	-2.99805	-2.30222	-2.64773
C17orf61	12	54951703	54952955	-	NaN	C17orf61	ENSSSCG00000025782	chromosome 17 open reading frame 61 [Source:HGNC Symbol;Acc:28618]	gene	overlapping	0	4.14741	3.97755	3.37206
C17ORF62	12	75313	80357	-	NaN	C17ORF62	ENSSSCG00000017127	Uncharacterized protein [Source:UniProtKB/TrEMBL;Acc:F1S010]	gene	overlapping	0	0.134204	-1.0059	-0.194636
C17ORF63	12	47004047	47033187	-	NaN	C17ORF63	ENSSSCG00000017774	Uncharacterized protein [Source:UniProtKB/TrEMBL;Acc:F1RNA9]	gene	overlapping	0	4.00466	2.96867	4.29058
C17ORF64	12	39173854	39181451	+	NaN	C17ORF64	ENSSSCG00000017679	Uncharacterized protein [Source:UniProtKB/TrEMBL;Acc:F1S206]	gene	overlapping	0	-2.99805	-2.30222	-2.64773
C17ORF66	12	41232680	41250185	+	NaN	C17ORF66	ENSSSCG00000017706	Uncharacterized protein [Source:UniProtKB/TrEMBL;Acc:F1S188]	gene	overlapping	0	-2.99805	-1.09358	-2.64773
C17orf70	12	1131866	1140216	+	NaN	C17orf70	ENSSSCG00000029616	chromosome 17 open reading frame 70 [Source:HGNC Symbol;Acc:26171]	gene	overlapping	0	-1.84007	-2.30222	-1.35141
C17orf74	12	55021680	55023478	-	NaN	C17orf74	ENSSSCG00000024584	chromosome 17 open reading frame 74 [Source:HGNC Symbol;Acc:27315]	gene	overlapping	0	-2.99805	-2.30222	-2.64773
C17ORF78	12	40411942	40473942	+	NaN	C17ORF78	ENSSSCG00000017696	Uncharacterized protein [Source:UniProtKB/TrEMBL;Acc:F1S1A5]	gene	overlapping	0	-2.99805	-2.30222	-2.64773
C17ORF79	12	44879933	44886799	+	NaN	C17ORF79	ENSSSCG00000017746	Uncharacterized protein [Source:UniProtKB/TrEMBL;Acc:F1RJ61]	gene	overlapping	0	1.68023	4.06091	2.16313
C17ORF80	12	7989934	8006734	-	NaN	C17ORF80	ENSSSCG00000017246	Uncharacterized protein [Source:UniProtKB/TrEMBL;Acc:F1RV34]	gene	overlapping	0	3.46389	2.53487	4.01765
C17ORF85	12	51819597	51850711	-	NaN	C17ORF85	ENSSSCG00000017870	Uncharacterized protein [Source:UniProtKB/TrEMBL;Acc:F1RGS3]	gene	overlapping	0	2.93515	3.04465	3.97669
C17ORF87	12	53805701	53826275	-	NaN	C17ORF87	ENSSSCG00000017896	Uncharacterized protein [Source:UniProtKB/TrEMBL;Acc:F1RGL6]	gene	overlapping	0	-2.99805	-2.30222	-2.64773
C17ORF97	12	49503228	49506132	+	NaN	C17ORF97	ENSSSCG00000017814	Uncharacterized protein [Source:UniProtKB/TrEMBL;Acc:F1RHI1]	gene	overlapping	0	-2.99805	-2.30222	-2.64773
C18orf1	6	89712706	89832876	-	NaN	C18orf1	ENSSSCG00000027417	chromosome 18 open reading frame 1 [Source:HGNC Symbol;Acc:1224]	gene	overlapping	0	0.347058	1.49533	1.07569
C18ORF25	1	106025621	106074150	+	NaN	C18ORF25	ENSSSCG00000004500	Uncharacterized protein [Source:UniProtKB/TrEMBL;Acc:F1RPS7]	gene	overlapping	0	3.3021	3.34831	4.18128
C18ORF26	1	114508253	114509545	+	NaN	C18ORF26	ENSSSCG00000004532	Uncharacterized protein [Source:UniProtKB/TrEMBL;Acc:F1S1Z4]	gene	overlapping	0	-2.99805	-2.30222	-2.64773
C18orf54	1	114168862	114190407	+	NaN	C18orf54	ENSSSCG00000004531	chromosome 18 open reading frame 54 [Source:HGNC Symbol;Acc:13796]	gene	overlapping	0	-0.0572733	-0.181257	1.55524
C18ORF55	1	166037946	166048719	-	NaN	C18ORF55	ENSSSCG00000004872	Uncharacterized protein [Source:UniProtKB/TrEMBL;Acc:F1SNL5]	gene	overlapping	0	0.363738	1.8479	3.48652
C18ORF63	1	166009447	166028798	-	NaN	C18ORF63	ENSSSCG00000004874	Uncharacterized protein [Source:UniProtKB/TrEMBL;Acc:F1SNL3]	gene	overlapping	0	-1.20089	-2.25156	-1.55994
C18ORF8	6	100922052	100926335	-	NaN	C18ORF8	ENSSSCG00000021338	Uncharacterized protein [Source:UniProtKB/TrEMBL;Acc:F1SBB6]	gene	overlapping	0	0.000338793	-0.898591	-2.59706
C18ORF8	6	101000229	101003382	+	NaN	C18ORF8	ENSSSCG00000030591	Uncharacterized protein [Source:UniProtKB/TrEMBL;Acc:F1SBB6]	gene	overlapping	0	3.01852	3.12287	2.65467
C19ORF12	6	35173983	35174180	+	NaN	C19ORF12	ENSSSCG00000002853	Uncharacterized protein [Source:UniProtKB/TrEMBL;Acc:F1RNY9]	gene	overlapping	0	-2.99805	-2.30222	-2.64773
C19ORF18	6	57272176	57281258	-	NaN	C19ORF18	ENSSSCG00000003994	Uncharacterized protein [Source:UniProtKB/TrEMBL;Acc:F1SC28]	gene	overlapping	0	-2.41906	-1.91822	-2.64773
C19ORF21	2	78314795	78317910	-	NaN	C19ORF21	ENSSSCG00000013425	Uncharacterized protein [Source:UniProtKB/TrEMBL;Acc:F1S6R3]	gene	overlapping	0	-2.99805	-2.30222	-2.64773
C19ORF22	2	77508534	77518367	-	NaN	C19ORF22	ENSSSCG00000013419	Uncharacterized protein [Source:UniProtKB/TrEMBL;Acc:F1S6S8]	gene	overlapping	0	1.23322	1.51078	0.30171
C19orf24	2	77841363	77844375	+	NaN	C19orf24	ENSSSCG00000028040	chromosome 19 open reading frame 24 [Source:HGNC Symbol;Acc:26073]	gene	overlapping	0	3.42705	1.97867	2.17816
C19orf25	2	77891286	77895615	+	NaN	C19orf25	ENSSSCG00000022265	chromosome 19 open reading frame 25 [Source:HGNC Symbol;Acc:26711]	gene	overlapping	0	0.415498	-1.58489	0.18024
C19ORF26	2	77824437	77828887	-	NaN	C19ORF26	ENSSSCG00000013430	Uncharacterized protein [Source:UniProtKB/TrEMBL;Acc:F1S6Q8]	gene	overlapping	0	-2.99805	-2.30222	-2.64773
C19ORF33	6	42723885	42724578	+	NaN	YIF1B	ENSSSCG00000002952	Uncharacterized protein [Source:UniProtKB/TrEMBL;Acc:F1RKJ4]	gene	overlapping	0	0.864572	0.864578	1.26201
C19ORF35	2	76848189	76852368	+	NaN	C19ORF35	ENSSSCG00000013461	Uncharacterized protein [Source:UniProtKB/TrEMBL;Acc:F1S8I2]	gene	overlapping	0	-2.99805	-2.30222	-2.64773
C19ORF38	2	70020224	70035675	+	NaN	C19ORF38	ENSSSCG00000013632	Uncharacterized protein [Source:UniProtKB/TrEMBL;Acc:F1S591]	gene	overlapping	0	-2.99805	-0.672567	-2.64773
C19ORF39	2	70423588	70425373	+	NaN	C19ORF39	ENSSSCG00000013619	Uncharacterized protein [Source:UniProtKB/TrEMBL;Acc:F1SA15]	gene	overlapping	0	1.50954	1.61618	2.53362
C19orf40	6	38322998	38326593	+	NaN	C19orf40	ENSSSCG00000023878	chromosome 19 open reading frame 40 [Source:HGNC Symbol;Acc:28467]	gene	overlapping	0	-0.570955	-2.25156	0.806568
C19ORF42	2	60549159	60553577	+	NaN	C19ORF42	ENSSSCG00000013863	Uncharacterized protein [Source:UniProtKB/TrEMBL;Acc:F2Z5I6]	gene	overlapping	0	-0.415734	1.12635	0.818442
C19ORF43	2	66642961	66646054	+	NaN	C19ORF43	ENSSSCG00000013727	Uncharacterized protein [Source:UniProtKB/TrEMBL;Acc:F1SEX4]	gene	overlapping	0	2.88267	3.22365	4.00228
C19ORF44	2	60666525	60732451	-	NaN	C19ORF44	ENSSSCG00000013859	Uncharacterized protein [Source:UniProtKB/TrEMBL;Acc:F1S9W4]	gene	overlapping	0	-2.08573	-2.25156	-2.64773
C19ORF45	2	72108780	72113251	+	NaN	MCOLN1	ENSSSCG00000013570	Uncharacterized protein [Source:UniProtKB/TrEMBL;Acc:F1SCJ4]	gene	overlapping	0	-2.99805	-2.30222	-2.64773
C19orf46	6	40782928	40787208	-	NaN	C19orf46	ENSSSCG00000002929	chromosome 19 open reading frame 46 [Source:HGNC Symbol;Acc:26703]	gene	overlapping	0	-2.99805	-2.30222	-2.64773
C19orf47	6	44396816	44408548	-	NaN	C19orf47	ENSSSCG00000027016	chromosome 19 open reading frame 47 [Source:HGNC Symbol;Acc:26723]	gene	overlapping	0	-2.41906	-2.25156	-1.82309
C19ORF50	2	59052042	59060500	+	NaN	C19ORF50	ENSSSCG00000013906	Uncharacterized protein [Source:UniProtKB/TrEMBL;Acc:F1S911]	gene	overlapping	0	4.62795	3.95037	4.20144
C19ORF52	2	70084078	70086380	+	NaN	YIPF2	ENSSSCG00000013634	Uncharacterized protein [Source:UniProtKB/TrEMBL;Acc:F1S589]	gene	overlapping	0	1.43158	1.37053	2.74498
C19ORF53	2	65669724	65673691	-	NaN	C19ORF53	ENSSSCG00000013757	Uncharacterized protein [Source:UniProtKB/TrEMBL;Acc:F1SD77]	gene	overlapping	0	3.59606	3.48361	4.74409
C19ORF54	6	44647442	44655648	-	NaN	C19ORF54	ENSSSCG00000002999	Uncharacterized protein [Source:UniProtKB/TrEMBL;Acc:F1RHB6]	gene	overlapping	0	3.06756	3.74103	3.27606
C19ORF57	2	65527188	65546424	+	NaN	C19ORF57	ENSSSCG00000013760	Uncharacterized protein [Source:UniProtKB/TrEMBL;Acc:F1SD74]	gene	overlapping	0	-2.99805	-2.30222	-2.64773
C19orf6	2	77594970	77604282	-	NaN	GRIN3B	ENSSSCG00000029635	glutamate receptor, ionotropic, N-methyl-D-aspartate 3B [Source:HGNC Symbol;Acc:16768]	gene	overlapping	0	4.00469	4.01773	4.77462
C19ORF60	2	59065441	59068526	+	NaN	C19ORF60	ENSSSCG00000013908	Uncharacterized protein [Source:UniProtKB/TrEMBL;Acc:F1S910]	gene	overlapping	0	4.16876	3.64769	4.42694
C19ORF63	6	51165004	51173214	+	NaN	FAM71E1	ENSSSCG00000003219	Uncharacterized protein [Source:UniProtKB/TrEMBL;Acc:F1RH17]	gene	overlapping	0	0.356396	1.75923	1.5932
C19ORF67	2	65375351	65378124	+	NaN	C19ORF67	ENSSSCG00000013769	Uncharacterized protein [Source:UniProtKB/TrEMBL;Acc:F1SD55]	gene	overlapping	0	-2.99805	-2.30222	-2.64773
C19ORF68	6	49246227	49262271	+	NaN	C19ORF68	ENSSSCG00000003129	Uncharacterized protein [Source:UniProtKB/TrEMBL;Acc:F1RL98]	gene	overlapping	0	-2.99805	-2.30222	-2.64773
C19ORF69	6	45216826	45218918	-	NaN	B9D2	ENSSSCG00000003013	Uncharacterized protein [Source:UniProtKB/TrEMBL;Acc:F1RH86]	gene	overlapping	0	-2.99805	-2.30222	-2.64773
C19ORF69	6	45307847	45309939	+	NaN	C19ORF69	ENSSSCG00000026163	Uncharacterized protein [Source:UniProtKB/TrEMBL;Acc:F1RH88]	gene	overlapping	0	-2.99805	-2.30222	-2.64773
C19ORF71	2	75776466	75779436	-	NaN	MFSD12	ENSSSCG00000026169	major facilitator superfamily domain containing 12 [Source:HGNC Symbol;Acc:28299]	gene	overlapping	0	-2.99805	-1.28857	-2.21306
C19orf77	2	75722686	75725053	-	NaN	C19orf77	ENSSSCG00000013480	chromosome 19 open reading frame 77 [Source:HGNC Symbol;Acc:37244]	gene	overlapping	0	-2.99805	-2.30222	-2.64773
C1D	3	77665511	77683806	+	NaN	C1D	ENSSSCG00000008354	C1D nuclear receptor corepressor [Source:HGNC Symbol;Acc:29911]	gene	overlapping	0	-0.0542228	1.91909	1.8009
C1GALT1	9	85078137	85113336	+	NaN	C1GALT1	ENSSSCG00000015341	Uncharacterized protein [Source:UniProtKB/TrEMBL;Acc:F1SF84]	gene	overlapping	0	5.54612	4.84121	5.13538
C1GALT1C1	X	112640638	112644345	+	NaN	C1GALT1C1	ENSSSCG00000012602	Uncharacterized protein [Source:UniProtKB/TrEMBL;Acc:F1RUC2]	gene	overlapping	0	2.24612	3.04588	3.9266
C1ORF100	10	19619100	19631068	-	NaN	C1ORF100	ENSSSCG00000010873	Uncharacterized protein [Source:UniProtKB/TrEMBL;Acc:F1S8M4]	gene	overlapping	0	-2.99805	-2.30222	-2.64773
C1ORF110	4	95274219	95280863	+	NaN	C1ORF110	ENSSSCG00000006336	Uncharacterized protein [Source:UniProtKB/TrEMBL;Acc:F1S214]	gene	overlapping	0	-2.99805	-2.30222	-1.29477
C1ORF111	4	95900184	95902590	-	NaN	NOS1AP	ENSSSCG00000006344	Uncharacterized protein [Source:UniProtKB/TrEMBL;Acc:F1S1D0]	gene	overlapping	0	-2.94738	-2.30222	-2.64773
C1ORF112	4	88800216	88842609	-	NaN	SCYL3	ENSSSCG00000006283	Uncharacterized protein [Source:UniProtKB/TrEMBL;Acc:F1RSD0]	gene	overlapping	0	4.53257	4.47092	5.08937
C1orf114	4	89185742	89219499	+	NaN	C1orf114	ENSSSCG00000028804	chromosome 1 open reading frame 114 [Source:HGNC Symbol;Acc:28051]	gene	overlapping	0	-1.61405	-2.30222	-2.59706
C1ORF115	10	12317328	12329170	-	NaN	MOSC1	ENSSSCG00000010829	Uncharacterized protein [Source:UniProtKB/TrEMBL;Acc:F1S9I6]	gene	overlapping	0	5.88896	3.92059	4.79223
C1orf123	6	146666512	146682189	+	NaN	C1orf123	ENSSSCG00000003850	chromosome 1 open reading frame 123 [Source:HGNC Symbol;Acc:26059]	gene	overlapping	0	4.36638	4.83448	5.18867
C1ORF130	6	75969654	75979354	+	NaN	C1ORF130	ENSSSCG00000003547	Uncharacterized protein [Source:UniProtKB/TrEMBL;Acc:F1STV1]	gene	overlapping	0	-2.99805	-2.20089	-2.64773
C1ORF131	14	63904112	63919053	+	NaN	GNPAT	ENSSSCG00000010175	dihydroxyacetone phosphate acyltransferase [Source:RefSeq peptide;Acc:NP_001172069]	gene	overlapping	0	2.34941	2.53218	3.48562
C1ORF135	6	76831764	76836866	-	NaN	FAM54B	ENSSSCG00000003553	Uncharacterized protein [Source:UniProtKB/TrEMBL;Acc:F1STT6]	gene	overlapping	0	-0.271209	-2.30222	-0.162396
C1ORF141	6	134410380	134464826	-	NaN	C1ORF141	ENSSSCG00000003803	Uncharacterized protein [Source:UniProtKB/TrEMBL;Acc:F1S823]	gene	overlapping	0	-2.17341	-1.53422	-1.48975
C1orf144	6	69794995	69797528	+	NaN	C1orf144	ENSSSCG00000003475	chromosome 1 open reading frame 144 [Source:HGNC Symbol;Acc:30232]	gene	overlapping	0	2.08431	2.05222	3.14864
C1ORF158	6	66834750	66846341	+	NaN	C1ORF158	ENSSSCG00000003442	Uncharacterized protein [Source:UniProtKB/TrEMBL;Acc:F1RF56]	gene	overlapping	0	-2.99805	-2.30222	-2.64773
C1orf159	6	57819109	57828758	+	NaN	C1orf159	ENSSSCG00000024797	chromosome 1 open reading frame 159 [Source:HGNC Symbol;Acc:26062]	gene	overlapping	0	-2.99805	-2.25156	-2.64773
C1orf167	6	65755347	65776279	+	NaN	C1orf167	ENSSSCG00000003427	chromosome 1 open reading frame 167 [Source:HGNC Symbol;Acc:25262]	gene	overlapping	0	-2.08573	-1.47758	-2.64773
C1orf168	6	143478850	143485480	+	NaN	C1orf168	ENSSSCG00000003836	chromosome 1 open reading frame 168 [Source:HGNC Symbol;Acc:27295]	gene	overlapping	0	-2.99805	-2.30222	-2.64773
C1ORF168	6	143581803	143591161	-	NaN	C1ORF168	ENSSSCG00000026682	Uncharacterized protein [Source:UniProtKB/TrEMBL;Acc:F1S787]	gene	overlapping	0	0.647886	2.26178	1.58691
C1ORF172	6	77824697	77828961	-	NaN	C1ORF172	ENSSSCG00000003567	Uncharacterized protein [Source:UniProtKB/TrEMBL;Acc:F1STQ5]	gene	overlapping	0	2.1773	2.73978	0.628124
C1ORF173	6	128400155	128476446	+	NaN	C1ORF173	ENSSSCG00000003781	Uncharacterized protein [Source:UniProtKB/TrEMBL;Acc:F1S9P6]	gene	overlapping	0	-2.99805	-2.30222	-2.64773
C1ORF174	6	60030404	60037320	+	NaN	C1ORF174	ENSSSCG00000003363	Uncharacterized protein [Source:UniProtKB/TrEMBL;Acc:F1RJA3]	gene	overlapping	0	-1.23005	-1.19491	-1.01808
C1orf177	6	145596736	145617162	-	NaN	C1orf177	ENSSSCG00000027362	chromosome 1 open reading frame 177 [Source:HGNC Symbol;Acc:26854]	gene	overlapping	0	-2.99805	-2.30222	-2.64773
C1ORF182	4	102427705	102435365	-	NaN	C1ORF182	ENSSSCG00000006486	Uncharacterized protein [Source:UniProtKB/TrEMBL;Acc:F1RP18]	gene	overlapping	0	-2.99805	-2.30222	-2.59706
C1ORF183	4	118808703	118810452	+	NaN	C1ORF183	ENSSSCG00000006784	Uncharacterized protein [Source:UniProtKB/TrEMBL;Acc:F1SBP1]	gene	overlapping	0	-2.28072	-2.30222	-2.64773
C1ORF186	9	72984449	73007285	+	NaN	C1ORF186	ENSSSCG00000015638	Uncharacterized protein [Source:UniProtKB/TrEMBL;Acc:F1SF07]	gene	overlapping	0	-2.99805	-2.30222	-2.64773
C1ORF187	6	65724993	65740644	-	NaN	C1ORF187	ENSSSCG00000003423	Uncharacterized protein [Source:UniProtKB/TrEMBL;Acc:F1RF90]	gene	overlapping	0	-2.17341	-1.67257	-2.59706
C1ORF189	4	104448280	104451792	+	NaN	C1ORF189	ENSSSCG00000006555	Uncharacterized protein [Source:UniProtKB/TrEMBL;Acc:F1RGK7]	gene	overlapping	0	-2.99805	-2.30222	-2.59706
C1orf192	4	96987357	96990714	+	NaN	C1orf192	ENSSSCG00000023957	chromosome 1 open reading frame 192 [Source:HGNC Symbol;Acc:32325]	gene	overlapping	0	0.543928	0.0137307	-2.64773
C1ORF194	4	121449539	121456283	+	NaN	C1ORF194	ENSSSCG00000006837	Uncharacterized protein [Source:UniProtKB/TrEMBL;Acc:F1S5Z1]	gene	overlapping	0	-2.61405	-2.30222	-2.64773
C1ORF198	14	64181766	64215461	+	NaN	C1ORF198	ENSSSCG00000010181	Uncharacterized protein [Source:UniProtKB/TrEMBL;Acc:F1RG57]	gene	overlapping	0	-2.41906	-1.91822	-2.64773
C1orf201	6	75779724	75801597	-	NaN	C1orf201	ENSSSCG00000003541	chromosome 1 open reading frame 201 [Source:HGNC Symbol;Acc:28070]	gene	overlapping	0	-2.99805	-2.30222	-2.64773
C1ORF21	9	137972543	138217904	+	NaN	C1ORF21	ENSSSCG00000015565	Uncharacterized protein [Source:UniProtKB/TrEMBL;Acc:F1S3P0]	gene	overlapping	0	-1.89074	-1.91822	0.214032
C1orf210	6	155396079	155399575	+	NaN	C1orf210	ENSSSCG00000003951	chromosome 1 open reading frame 210 [Source:HGNC Symbol;Acc:28755]	gene	overlapping	0	2.90922	0.397732	1.44936
C1orf222	6	58494541	58540071	+	NaN	C1orf222	ENSSSCG00000030513	chromosome 1 open reading frame 222 [Source:HGNC Symbol;Acc:27917]	gene	overlapping	0	-2.99805	-2.30222	-2.64773
C1ORF227	9	143522913	143523945	+	NaN	C1ORF227	ENSSSCG00000015591	Uncharacterized protein [Source:UniProtKB/TrEMBL;Acc:F1S2W5]	gene	overlapping	0	-2.99805	-2.30222	-2.64773
C1ORF27	9	139992533	140033101	+	NaN	C1ORF27	ENSSSCG00000015577	Uncharacterized protein [Source:UniProtKB/TrEMBL;Acc:F1S2Z9]	gene	overlapping	0	3.68727	3.17159	4.19522
C1ORF31	14	60803273	60811091	-	NaN	C1ORF31	ENSSSCG00000010161	Uncharacterized protein [Source:UniProtKB/TrEMBL;Acc:F1RGW3]	gene	overlapping	0	1.13771	1.1399	1.61532
C1ORF35	2	53870874	53873178	+	NaN	C1ORF35	ENSSSCG00000013991	Uncharacterized protein [Source:UniProtKB/TrEMBL;Acc:F1S5R8]	gene	overlapping	0	2.80833	1.35039	2.78811
C1ORF38	6	78550595	78568631	+	NaN	C1ORF38	ENSSSCG00000003584	Uncharacterized protein [Source:UniProtKB/TrEMBL;Acc:F1STM8]	gene	overlapping	0	-2.31773	-1.91822	-2.64773
C1orf50	6	156177269	156183027	-	NaN	C1orf50	ENSSSCG00000027374	chromosome 1 open reading frame 50 [Source:HGNC Symbol;Acc:28795]	gene	overlapping	0	3.02594	2.11323	2.98174
C1ORF51	4	108088711	108091789	-	NaN	C1ORF51	ENSSSCG00000006655	Uncharacterized protein [Source:UniProtKB/TrEMBL;Acc:F1SS75]	gene	overlapping	0	-2.61405	-1.86755	1.21617
C1orf53	10	25341843	25347627	+	NaN	C1orf53	ENSSSCG00000010902	chromosome 1 open reading frame 53 [Source:HGNC Symbol;Acc:30003]	gene	overlapping	0	-0.480739	-1.58489	-1.66128
C1ORF55	10	15889618	15908449	+	NaN	C1ORF55	ENSSSCG00000010858	Uncharacterized protein [Source:UniProtKB/TrEMBL;Acc:F1S8Q9]	gene	overlapping	0	2.56516	2.74184	4.47269
C1ORF56	4	107434346	107436243	-	NaN	C1ORF56	ENSSSCG00000006639	Uncharacterized protein [Source:UniProtKB/TrEMBL;Acc:F1SSA1]	gene	overlapping	0	0.0538679	-0.810913	-2.06874
C1ORF65	10	22082644	22084488	+	NaN	C1ORF65	ENSSSCG00000010888	Uncharacterized protein [Source:UniProtKB/TrEMBL;Acc:F1S648]	gene	overlapping	0	-2.41906	-2.30222	-2.64773
C1ORF68	4	105708515	105709318	-	NaN	C1ORF68	ENSSSCG00000006599	Uncharacterized protein [Source:UniProtKB/TrEMBL;Acc:F1SFT0]	gene	overlapping	0	-2.99805	-2.30222	-2.64773
C1ORF69	2	53824455	53835832	-	NaN	C1ORF69	ENSSSCG00000013988	Uncharacterized protein [Source:UniProtKB/TrEMBL;Acc:F1S5S1]	gene	overlapping	0	2.06542	2.87664	2.73565
C1ORF74	9	146263788	146265474	+	NaN	C1ORF74	ENSSSCG00000015613	Uncharacterized protein [Source:UniProtKB/TrEMBL;Acc:F1SF50]	gene	overlapping	0	-0.171925	-0.231924	-2.64773
C1ORF84	6	155227990	155229065	+	NaN	C1ORF84	ENSSSCG00000003942	Uncharacterized protein [Source:UniProtKB/TrEMBL;Acc:F1S315]	gene	overlapping	0	-2.28072	-1.33923	-2.64773
C1ORF85	4	102459048	102461635	+	NaN	C1ORF85	ENSSSCG00000006488	Uncharacterized protein [Source:UniProtKB/TrEMBL;Acc:F1RP16]	gene	overlapping	0	4.85304	3.82249	0.537036
C1ORF87	6	139665483	139746337	-	NaN	C1ORF87	ENSSSCG00000003823	Uncharacterized protein [Source:UniProtKB/TrEMBL;Acc:F1S7Z1]	gene	overlapping	0	-2.99805	-2.30222	-2.64773
C1ORF9	9	126532896	126604581	+	NaN	C1ORF9	ENSSSCG00000015485	Uncharacterized protein [Source:UniProtKB/TrEMBL;Acc:F1S7S5]	gene	overlapping	0	5.54734	5.86331	6.16827
C1ORF94	6	84339693	84361009	+	NaN	C1ORF94	ENSSSCG00000003623	Uncharacterized protein [Source:UniProtKB/TrEMBL;Acc:F1SV78]	gene	overlapping	0	-2.99805	-2.30222	-2.64773
C1orf95	10	16690085	16739938	+	NaN	C1orf95	ENSSSCG00000024288	chromosome 1 open reading frame 95 [Source:HGNC Symbol;Acc:30491]	gene	overlapping	0	-2.99805	-2.30222	-2.64773
C1ORF96	14	65286152	65307305	+	NaN	C1ORF96	ENSSSCG00000023776	Uncharacterized protein [Source:UniProtKB/TrEMBL;Acc:F1RG27]	gene	overlapping	0	1.2636	2.04273	0.431391
C1QA_PIG	6	74609912	74612993	+	NaN	C1QA	ENSSSCG00000003524	Complement C1q subcomponent subunit A [Source:UniProtKB/Swiss-Prot;Acc:Q69DL0]	gene	overlapping	0	-2.99805	-1.58489	-1.82309
C1QL1	12	18655010	18661516	+	NaN	C1QL1	ENSSSCG00000017341	Uncharacterized protein [Source:UniProtKB/TrEMBL;Acc:F1RR04]	gene	overlapping	0	-2.99805	-2.30222	-2.64773
C1QL2	15	28311838	28313309	-	NaN	C1QL2	ENSSSCG00000015717	complement component 1, q subcomponent-like 2 [Source:HGNC Symbol;Acc:24181]	gene	overlapping	0	-2.99805	-2.30222	-2.64773
C1QL3	10	50066724	50073357	+	NaN	C1QL3	ENSSSCG00000011043	Uncharacterized protein [Source:UniProtKB/TrEMBL;Acc:F2Z5D5]	gene	overlapping	0	-2.99805	-2.30222	-2.64773
C1QL4	5	15715140	15718334	-	NaN	C1QL4	ENSSSCG00000000197	Uncharacterized protein [Source:UniProtKB/TrEMBL;Acc:F1SHB8]	gene	overlapping	0	-2.28072	-2.25156	-2.64773
C1QTNF4	2	16202335	16203297	+	NaN	C1QTNF4	ENSSSCG00000013231	Uncharacterized protein [Source:UniProtKB/TrEMBL;Acc:F1SIF0]	gene	overlapping	0	-2.94738	-2.30222	-2.64773
C1QTNF5	9	51582416	51584218	-	NaN	C1QTNF5	ENSSSCG00000024936	C1q and tumor necrosis factor related protein 5 [Source:HGNC Symbol;Acc:14344]	gene	overlapping	0	-2.99805	-2.30222	-2.64773
C20ORF111	17	52126197	52134377	-	NaN	C20ORF111	ENSSSCG00000025757	Uncharacterized protein [Source:UniProtKB/TrEMBL;Acc:F1SDS4]	gene	overlapping	0	1.54205	1.07569	1.74278
C20ORF112	17	40987883	41067223	-	NaN	C20ORF112	ENSSSCG00000007249	Uncharacterized protein [Source:UniProtKB/TrEMBL;Acc:F1S517]	gene	overlapping	0	1.80341	1.57434	3.22132
C20ORF118	17	45549110	45561280	+	NaN	C20ORF118	ENSSSCG00000030008	Uncharacterized protein [Source:UniProtKB/TrEMBL;Acc:F1SEM8]	gene	overlapping	0	2.01705	1.30522	1.84966
C20ORF123	17	54443915	54450548	-	NaN	C20ORF123	ENSSSCG00000007448	Uncharacterized protein [Source:UniProtKB/TrEMBL;Acc:F1SC33]	gene	overlapping	0	-2.99805	-2.30222	-2.64773
C20ORF132	4	1546907	1565550	+	NaN	C20ORF132	ENSSSCG00000005928	Uncharacterized protein [Source:UniProtKB/TrEMBL;Acc:F1RSK7]	gene	overlapping	0	-2.99805	-2.30222	-2.64773
C20ORF134	17	42108762	42109499	+	NaN	NECAB3	ENSSSCG00000029626	N-terminal EF-hand calcium binding protein 3 [Source:HGNC Symbol;Acc:15851]	gene	overlapping	0	-2.99805	-2.30222	-2.64773
C20ORF151	17	69190180	69197947	-	NaN	C20ORF151	ENSSSCG00000007539	Uncharacterized protein [Source:UniProtKB/TrEMBL;Acc:F1RIZ2]	gene	overlapping	0	-2.99805	-2.30222	-2.64773
C20ORF152	17	44774986	44816435	-	NaN	C20ORF152	ENSSSCG00000007313	Uncharacterized protein [Source:UniProtKB/TrEMBL;Acc:F1S486]	gene	overlapping	0	-1.23762	-2.30222	-2.64773
C20ORF160	17	40604637	40623901	+	NaN	C20ORF160	ENSSSCG00000007239	Uncharacterized protein [Source:UniProtKB/TrEMBL;Acc:F1S526]	gene	overlapping	0	-2.99805	-2.30222	-2.64773
C20ORF165	17	53724873	53725948	-	NaN	C20ORF165	ENSSSCG00000007429	Uncharacterized protein [Source:UniProtKB/TrEMBL;Acc:F1SC73]	gene	overlapping	0	-2.99805	-2.30222	-2.64773
C20orf173	17	43996161	43996848	-	NaN	C20orf173	ENSSSCG00000028893	chromosome 20 open reading frame 173 [Source:HGNC Symbol;Acc:16166]	gene	overlapping	0	-2.99805	-2.30222	-1.66128
C20ORF177	17	67413623	67414765	+	NaN	C20ORF177	ENSSSCG00000007531	Uncharacterized protein [Source:UniProtKB/TrEMBL;Acc:F1RJ11]	gene	overlapping	0	-2.94738	-2.30222	-2.64773
C20ORF194	17	36664596	36809822	+	NaN	C20ORF194	ENSSSCG00000007155	Uncharacterized protein [Source:UniProtKB/TrEMBL;Acc:F1S8B5]	gene	overlapping	0	3.78853	3.0197	2.16527
C20ORF202	17	38632919	38635409	-	NaN	C20ORF202	ENSSSCG00000007192	Uncharacterized protein [Source:UniProtKB/TrEMBL;Acc:F1S873]	gene	overlapping	0	-2.99805	-0.760245	-2.64773
C20ORF27	17	36283270	36283745	+	NaN	C20ORF27	ENSSSCG00000007148	Uncharacterized protein [Source:UniProtKB/TrEMBL;Acc:F1S8C0]	gene	overlapping	0	-1.61405	-1.33923	-2.06874
C20ORF29	17	36226136	36236032	-	NaN	C20ORF29	ENSSSCG00000023811	Uncharacterized protein [Source:UniProtKB/TrEMBL;Acc:F1S8C5]	gene	overlapping	0	2.71943	2.39968	2.26055
C20ORF3	17	34915804	34943898	-	NaN	C20ORF3	ENSSSCG00000007132	Uncharacterized protein [Source:UniProtKB/TrEMBL;Acc:F1SAS3]	gene	overlapping	0	0.0762393	1.00018	0.806568
C20ORF4	17	44904068	44926199	+	NaN	C20ORF4	ENSSSCG00000007315	Uncharacterized protein [Source:UniProtKB/TrEMBL;Acc:F1S484]	gene	overlapping	0	2.77557	2.67705	3.41002
C20ORF54	17	39142053	39159527	+	NaN	C20ORF54	ENSSSCG00000007199	Uncharacterized protein [Source:UniProtKB/TrEMBL;Acc:F1S866]	gene	overlapping	0	0.551384	0.861838	-1.72175
C20ORF7	17	25160224	25188788	+	NaN	C20ORF7	ENSSSCG00000007076	Uncharacterized protein [Source:UniProtKB/TrEMBL;Acc:F1SBJ3]	gene	overlapping	0	3.94985	3.27365	4.07803
C20ORF72	17	29871217	29884809	+	NaN	C20ORF72	ENSSSCG00000007089	Uncharacterized protein [Source:UniProtKB/TrEMBL;Acc:F1SBI0]	gene	overlapping	0	3.31743	3.76802	4.29249
C20ORF79	17	30473007	30473474	+	NaN	C20ORF79	ENSSSCG00000007099	Uncharacterized protein [Source:UniProtKB/TrEMBL;Acc:F1SBH0]	gene	overlapping	0	-2.99805	-2.30222	-2.64773
C20ORF94	17	21839085	22025392	+	NaN	C20ORF94	ENSSSCG00000007066	Uncharacterized protein [Source:UniProtKB/TrEMBL;Acc:F1SBK2]	gene	overlapping	0	1.85368	0.101409	0.794392
C20orf96	17	39672741	39696190	+	NaN	C20orf96	ENSSSCG00000007212	chromosome 20 open reading frame 96 [Source:HGNC Symbol;Acc:16227]	gene	overlapping	0	-2.94738	-2.30222	-2.64773
C21orf2	13	217075879	217081661	-	NaN	C21orf2	ENSSSCG00000024500	chromosome 21 open reading frame 2 [Source:HGNC Symbol;Acc:1260]	gene	overlapping	0	-2.28072	-1.09358	-2.5464
C21orf56	13	218494210	218512148	-	NaN	C21orf56	ENSSSCG00000029847	chromosome 21 open reading frame 56 [Source:HGNC Symbol;Acc:1298]	gene	overlapping	0	-2.99805	-2.30222	-2.64773
C21ORF59	13	206219931	206235889	-	NaN	C21ORF59	ENSSSCG00000012036	Uncharacterized protein [Source:UniProtKB/TrEMBL;Acc:F1SHM2]	gene	overlapping	0	3.73545	2.60018	3.53113
C21orf7	13	202866434	202893927	+	NaN	C21orf7	ENSSSCG00000012028	chromosome 21 open reading frame 7 [Source:HGNC Symbol;Acc:16457]	gene	overlapping	0	-2.99805	-2.30222	-2.64773
C21orf91	13	192505850	192540712	-	NaN	C21orf91	ENSSSCG00000021429	chromosome 21 open reading frame 91 [Source:HGNC Symbol;Acc:16459]	gene	overlapping	0	0.580102	1.55782	0.214032
C22ORF15	14	53366681	53368344	-	NaN	C22ORF15	ENSSSCG00000010074	Uncharacterized protein [Source:UniProtKB/TrEMBL;Acc:F1RL19]	gene	overlapping	0	-2.99805	-2.30222	-2.64773
C22ORF23	5	7384570	7390994	+	NaN	C22ORF23	ENSSSCG00000000117	Uncharacterized protein [Source:UniProtKB/TrEMBL;Acc:F1SKN7]	gene	overlapping	0	-2.99805	-2.30222	-2.64773
C22ORF25	14	55088807	55101191	+	NaN	C22ORF25	ENSSSCG00000010134	Uncharacterized protein [Source:UniProtKB/TrEMBL;Acc:F1RHN1]	gene	overlapping	0	3.17937	2.93939	1.16336
C22ORF33	5	8367742	8375527	+	NaN	C22ORF33	ENSSSCG00000000132	Uncharacterized protein [Source:UniProtKB/TrEMBL;Acc:F1SKL3]	gene	overlapping	0	-2.99805	-2.30222	-2.64773
C22ORF36	14	53051251	53057255	-	NaN	C22ORF36	ENSSSCG00000010057	Uncharacterized protein [Source:UniProtKB/TrEMBL;Acc:F1RL43]	gene	overlapping	0	-2.99805	-2.30222	-2.64773
C22ORF39	14	54676422	54679346	-	NaN	C22ORF39	ENSSSCG00000010120	Uncharacterized protein [Source:UniProtKB/TrEMBL;Acc:F1RK62]	gene	overlapping	0	-2.99805	-2.25156	-2.64773
C22ORF40	5	496540	504125	-	NaN	C22ORF40	ENSSSCG00000000005	Uncharacterized protein [Source:UniProtKB/TrEMBL;Acc:F1SM77]	gene	overlapping	0	-1.31175	-1.53422	-0.495729
C22ORF46	5	4252517	4255506	-	NaN	C22ORF46	ENSSSCG00000000057	Uncharacterized protein [Source:UniProtKB/TrEMBL;Acc:F1SRE1]	gene	overlapping	0	-2.99805	-2.30222	-2.64773
C2CD2	13	215572917	215639734	-	NaN	C2CD2	ENSSSCG00000025821	Uncharacterized protein [Source:UniProtKB/TrEMBL;Acc:F1SG46]	gene	overlapping	0	5.31975	5.0916	4.92563
C2CD2L	9	51356375	51366267	+	NaN	C2CD2L	ENSSSCG00000015111	Uncharacterized protein [Source:UniProtKB/TrEMBL;Acc:F1SAH4]	gene	overlapping	0	-1.0769	0.542052	0.597087
C2CD3	9	9183639	9349502	-	NaN	C2CD3	ENSSSCG00000014835	C2 calcium-dependent domain containing 3 [Source:HGNC Symbol;Acc:24564]	gene	overlapping	0	2.77042	2.87329	2.8876
C2CD4D	4	106299633	106300694	+	NaN	C2CD4D	ENSSSCG00000023348	Uncharacterized protein [Source:UniProtKB/TrEMBL;Acc:F1ST20]	gene	overlapping	0	-2.99805	-2.30222	-2.64773
C2CD4D	4	106392968	106394029	+	NaN	C2CD4D	ENSSSCG00000021540	Uncharacterized protein [Source:UniProtKB/TrEMBL;Acc:F1ST20]	gene	overlapping	0	-2.99805	-2.30222	-2.64773
C2ORF16	3	118573571	118578904	-	NaN	C2ORF16	ENSSSCG00000008544	Uncharacterized protein [Source:UniProtKB/TrEMBL;Acc:F1SEF3]	gene	overlapping	0	-2.99805	-2.30222	-2.64773
C2ORF18	3	119279961	119296228	-	NaN	C2ORF18	ENSSSCG00000008562	Uncharacterized protein [Source:UniProtKB/TrEMBL;Acc:F1SDQ0]	gene	overlapping	0	3.35425	2.77218	2.95971
C2orf28	3	118912947	118918798	-	NaN	C2orf28	ENSSSCG00000022058	chromosome 2 open reading frame 28 [Source:HGNC Symbol;Acc:24090]	gene	overlapping	0	2.79053	2.46055	2.75023
C2ORF29	3	55610359	55626952	-	NaN	C2ORF29	ENSSSCG00000008167	Uncharacterized protein [Source:UniProtKB/TrEMBL;Acc:F1STG2]	gene	overlapping	0	3.47301	3.75095	4.40771
C2ORF40	3	51051816	51062808	+	NaN	C2ORF40	ENSSSCG00000008142	Uncharacterized protein [Source:UniProtKB/TrEMBL;Acc:F1SU23]	gene	overlapping	0	-2.99805	-2.30222	-2.64773
C2orf43	3	125415903	125535990	+	NaN	C2orf43	ENSSSCG00000025357	chromosome 2 open reading frame 43 [Source:HGNC Symbol;Acc:26145]	gene	overlapping	0	3.42552	2.94952	3.16964
C2ORF44	3	121901049	121916032	+	NaN	C2ORF44	ENSSSCG00000008589	Uncharacterized protein [Source:UniProtKB/TrEMBL;Acc:F1SDJ2]	gene	overlapping	0	0.543092	0.602242	0.196543
C2ORF47	15	114852786	114865265	+	NaN	TYW5	ENSSSCG00000016087	Uncharacterized protein [Source:UniProtKB/TrEMBL;Acc:F1SI72]	gene	overlapping	0	2.2362	0.583004	2.98532
C2orf49	3	51854371	51857245	+	NaN	C2orf49	ENSSSCG00000029999	chromosome 2 open reading frame 49 [Source:HGNC Symbol;Acc:28772]	gene	overlapping	0	-1.59442	-1.20089	-2.01808
C2ORF51	3	60132947	60136805	-	NaN	C2ORF51	ENSSSCG00000008209	Uncharacterized protein [Source:UniProtKB/TrEMBL;Acc:F1STB9]	gene	overlapping	0	-2.99805	-2.30222	-2.64773
C2ORF53	3	118987857	118989050	+	NaN	C2ORF53	ENSSSCG00000008552	Uncharacterized protein [Source:UniProtKB/TrEMBL;Acc:F1SED5]	gene	overlapping	0	-2.99805	-2.30222	-2.64773
C2ORF54	15	157631183	157640428	-	NaN	C2ORF54	ENSSSCG00000016400	Uncharacterized protein [Source:UniProtKB/TrEMBL;Acc:F1SHW7]	gene	overlapping	0	-2.61405	-2.25156	-2.26373
C2ORF55	3	58021313	58040774	+	NaN	C2ORF55	ENSSSCG00000008187	Uncharacterized protein [Source:UniProtKB/TrEMBL;Acc:F1STE1]	gene	overlapping	0	2.67967	1.38802	-1.0121
C2ORF56	3	109422224	109445909	+	NaN	CEBPZ	ENSSSCG00000008493	Uncharacterized protein [Source:UniProtKB/TrEMBL;Acc:F1S4Q6]	gene	overlapping	0	1.73162	3.46027	3.24008
C2ORF57	15	146041091	146042122	+	NaN	C2ORF57	ENSSSCG00000016278	Uncharacterized protein [Source:UniProtKB/TrEMBL;Acc:F1SMV3]	gene	overlapping	0	-2.99805	-2.30222	-2.64773
C2ORF61	3	99516479	99563892	-	NaN	C2ORF61	ENSSSCG00000008432	Uncharacterized protein [Source:UniProtKB/TrEMBL;Acc:F1SQH0]	gene	overlapping	0	-2.99805	-2.30222	-1.43909
C2ORF63	3	90781750	90831103	+	NaN	C2ORF63	ENSSSCG00000008402	Uncharacterized protein [Source:UniProtKB/TrEMBL;Acc:F1SQK7]	gene	overlapping	0	-1.89672	-1.3899	-0.977737
C2orf65	3	71591809	71665802	+	NaN	C2orf65	ENSSSCG00000008263	chromosome 2 open reading frame 65 [Source:HGNC Symbol;Acc:25183]	gene	overlapping	0	-2.99805	-2.30222	-2.64773
C2ORF66	15	111764267	111767987	-	NaN	C2ORF66	ENSSSCG00000016072	Uncharacterized protein [Source:UniProtKB/TrEMBL;Acc:F1SN11]	gene	overlapping	0	-2.28072	-2.30222	-2.64773
C2ORF68	3	62059118	62062267	-	NaN	C2ORF68	ENSSSCG00000008234	Uncharacterized protein [Source:UniProtKB/TrEMBL;Acc:F1SVB5]	gene	overlapping	0	-2.99805	-2.30222	-2.64773
C2ORF68	3	62217739	62224257	+	NaN	C2ORF68	ENSSSCG00000028287	Uncharacterized protein [Source:UniProtKB/TrEMBL;Acc:F1SVB5]	gene	overlapping	0	1.42655	2.18123	2.39684
C2ORF69	15	114817412	114828082	+	NaN	C2ORF69	ENSSSCG00000016086	Uncharacterized protein [Source:UniProtKB/TrEMBL;Acc:F1SI73]	gene	overlapping	0	-0.143206	-1.6219	-0.634075
C2ORF70	3	119458386	119473685	-	NaN	C2ORF70	ENSSSCG00000008565	Uncharacterized protein [Source:UniProtKB/TrEMBL;Acc:F1SDN7]	gene	overlapping	0	-2.99805	-2.30222	-2.64773
C2orf71	3	117036911	117045698	+	NaN	C2orf71	ENSSSCG00000024725	chromosome 2 open reading frame 71 [Source:HGNC Symbol;Acc:34383]	gene	overlapping	0	-2.99805	-2.30222	-2.64773
C2ORF72	15	145450297	145460228	-	NaN	C2ORF72	ENSSSCG00000016270	Uncharacterized protein [Source:UniProtKB/TrEMBL;Acc:F1SMX1]	gene	overlapping	0	-1.98439	-1.33923	-1.35141
C2ORF73	3	91670285	91700673	-	NaN	C2ORF73	ENSSSCG00000008410	Uncharacterized protein [Source:UniProtKB/TrEMBL;Acc:F1SQK0]	gene	overlapping	0	-2.99805	-2.30222	-2.64773
C2ORF74	3	84514646	84517992	+	NaN	C2ORF74	ENSSSCG00000008384	Uncharacterized protein [Source:UniProtKB/TrEMBL;Acc:F1SQM3]	gene	overlapping	0	-2.94738	-1.25156	-2.64773
C2ORF76	15	28517964	28578003	-	NaN	C2ORF76	ENSSSCG00000015718	Uncharacterized protein [Source:UniProtKB/TrEMBL;Acc:F1RY07]	gene	overlapping	0	-0.274632	-0.898591	0.36089
C2orf77	15	85101218	85126943	-	NaN	C2orf77	ENSSSCG00000015935	chromosome 2 open reading frame 77 [Source:HGNC Symbol;Acc:25064]	gene	overlapping	0	-2.23005	-2.30222	-1.82309
C2ORF78	3	72394859	72402688	-	NaN	C2ORF78	ENSSSCG00000008299	Uncharacterized protein [Source:UniProtKB/TrEMBL;Acc:F1SLG0]	gene	overlapping	0	-2.17341	-0.949259	-2.64773
C2ORF80	15	122804201	122823136	-	NaN	C2ORF80	ENSSSCG00000016146	Uncharacterized protein [Source:UniProtKB/TrEMBL;Acc:F1SSU0]	gene	overlapping	0	-2.99805	-2.30222	-2.64773
C2orf84	3	121775512	121800800	-	NaN	C2orf84	ENSSSCG00000008582	chromosome 2 open reading frame 84 [Source:HGNC Symbol;Acc:34418]	gene	overlapping	0	-2.61405	-2.30222	-2.64773
C2ORF88	15	105959228	105959515	+	NaN	C2ORF88	ENSSSCG00000016048	Uncharacterized protein [Source:UniProtKB/TrEMBL;Acc:F1SN53]	gene	overlapping	0	-2.99805	-2.30222	-2.64773
C3ORF14	13	47903731	47917819	+	NaN	C3ORF14	ENSSSCG00000011486	Uncharacterized protein [Source:UniProtKB/TrEMBL;Acc:F1SGF9]	gene	overlapping	0	-2.99805	-2.30222	-2.64773
C3ORF15	13	149807756	149879050	-	NaN	ENSSSCG00000028774	ENSSSCG00000028774	No description	gene	overlapping	0	-2.94738	-1.91822	-0.823088
C3ORF17	13	156503350	156514581	+	NaN	C3ORF17	ENSSSCG00000011923	Uncharacterized protein [Source:UniProtKB/TrEMBL;Acc:F1SLU3]	gene	overlapping	0	2.58702	3.7472	3.62
C3ORF18	13	36242597	36247862	-	NaN	C3ORF18	ENSSSCG00000011413	Uncharacterized protein [Source:UniProtKB/TrEMBL;Acc:F1SJ18]	gene	overlapping	0	-2.99805	-2.30222	-2.64773
C3ORF22	13	80920744	80923326	+	NaN	C3ORF22	ENSSSCG00000011626	Uncharacterized protein [Source:UniProtKB/TrEMBL;Acc:F1SPF1]	gene	overlapping	0	-2.99805	-2.30222	-2.64773
C3orf23	13	30479442	30493165	+	NaN	C3orf23	ENSSSCG00000025739	chromosome 3 open reading frame 23 [Source:HGNC Symbol;Acc:25241]	gene	overlapping	0	0.963057	1.40902	1.97123
C3ORF26	13	168488952	168614804	-	NaN	C3ORF26	ENSSSCG00000011970	Uncharacterized protein [Source:UniProtKB/TrEMBL;Acc:F1SKY0]	gene	overlapping	0	3.49392	4.40892	3.89518
C3orf32	13	72320724	72339732	-	NaN	C3orf32	ENSSSCG00000023082	chromosome 3 open reading frame 32 [Source:HGNC Symbol;Acc:24809]	gene	overlapping	0	-2.99805	-2.30222	-2.64773
C3orf33	13	103681269	103696666	-	NaN	C3orf33	ENSSSCG00000021495	chromosome 3 open reading frame 33 [Source:HGNC Symbol;Acc:26434]	gene	overlapping	0	-1.50674	-0.319603	-2.59706
C3orf37	13	79390523	79408292	-	NaN	C3orf37	ENSSSCG00000011611	chromosome 3 open reading frame 37 [Source:HGNC Symbol;Acc:24446]	gene	overlapping	0	-0.0486084	0.481386	1.67122
C3ORF39	13	29116196	29117938	-	NaN	C3ORF39	ENSSSCG00000011293	Uncharacterized protein [Source:UniProtKB/TrEMBL;Acc:F1SRD5]	gene	overlapping	0	-0.230048	0.208718	-0.998445
C3ORF45	13	35933297	35934707	+	NaN	IFRD2	ENSSSCG00000024363	interferon-related developmental regulator 2 [Source:HGNC Symbol;Acc:5457]	gene	overlapping	0	-2.99805	-2.30222	-2.64773
C3ORF49	13	49800484	49812253	+	NaN	C3ORF49	ENSSSCG00000011490	Uncharacterized protein [Source:UniProtKB/TrEMBL;Acc:F1SGF5]	gene	overlapping	0	0.107958	0.118898	-2.01808
C3ORF54	13	35509777	35511377	+	NaN	C3ORF54	ENSSSCG00000011392	Uncharacterized protein [Source:UniProtKB/TrEMBL;Acc:F1SPR1]	gene	overlapping	0	-2.99805	-2.25156	-2.64773
C3ORF58	13	92372948	92390877	-	NaN	C3ORF58	ENSSSCG00000011687	Uncharacterized protein [Source:UniProtKB/TrEMBL;Acc:F1SKE3]	gene	overlapping	0	-2.99805	-2.30222	-0.772421
C3ORF64	13	55478569	55514534	-	NaN	C3ORF64	ENSSSCG00000011504	Uncharacterized protein [Source:UniProtKB/TrEMBL;Acc:F1SFQ3]	gene	overlapping	0	-0.568418	2.41688	-1.29477
C3orf67	13	44581185	44783481	-	NaN	C3orf67	ENSSSCG00000011482	chromosome 3 open reading frame 67 [Source:HGNC Symbol;Acc:24763]	gene	overlapping	0	1.88059	0.647219	-0.69829
C3ORF75	13	33557790	33572146	-	NaN	C3ORF75	ENSSSCG00000011336	Uncharacterized protein [Source:UniProtKB/TrEMBL;Acc:F1SNU2]	gene	overlapping	0	2.29639	2.65364	2.4073
C4BPA	9	74110909	74154259	+	NaN	C4BPA	ENSSSCG00000015662	Uncharacterized protein [Source:UniProtKB/TrEMBL;Acc:F1S0J2]	gene	overlapping	0	-1.38057	-2.20089	-0.0822909
C4BPB	9	74096099	74105705	+	NaN	C4BPB	ENSSSCG00000015661	Uncharacterized protein [Source:UniProtKB/TrEMBL;Acc:F1S0J3]	gene	overlapping	0	-2.36839	-1.14425	-2.06874
C4ORF17	8	130219448	130222743	+	NaN	C4ORF17	ENSSSCG00000009181	Uncharacterized protein [Source:UniProtKB/TrEMBL;Acc:F1S0Z1]	gene	overlapping	0	-2.99805	-2.30222	-2.64773
C4ORF19	8	30512257	30515528	+	NaN	C4ORF19	ENSSSCG00000008771	Uncharacterized protein [Source:UniProtKB/TrEMBL;Acc:F1S4L8]	gene	overlapping	0	-2.17341	-1.81689	-1.40208
C4ORF21	8	115058036	115074765	-	NaN	C4ORF21	ENSSSCG00000009120	Uncharacterized protein [Source:UniProtKB/TrEMBL;Acc:F1S149]	gene	overlapping	0	1.512	2.82137	3.91184
C4orf22	8	146606961	146643640	+	NaN	C4orf22	ENSSSCG00000027817	chromosome 4 open reading frame 22 [Source:HGNC Symbol;Acc:28554]	gene	overlapping	0	-2.99805	-0.47758	-0.797087
C4orf27	14	21313204	21329154	+	NaN	C4orf27	ENSSSCG00000009711	chromosome 4 open reading frame 27 [Source:HGNC Symbol;Acc:26051]	gene	overlapping	0	3.70208	4.05654	4.25328
C4ORF29	8	103756776	103791897	-	NaN	C4ORF29	ENSSSCG00000009074	Uncharacterized protein [Source:UniProtKB/TrEMBL;Acc:F1RRB0]	gene	overlapping	0	3.9373	3.34828	2.88683
C4ORF33	8	102652237	102670274	-	NaN	C4ORF33	ENSSSCG00000009069	Uncharacterized protein [Source:UniProtKB/TrEMBL;Acc:F1RRC4]	gene	overlapping	0	3.29838	3.53754	2.3118
C4orf34	8	32380057	32387060	-	NaN	C4orf34	ENSSSCG00000021793	chromosome 4 open reading frame 34 [Source:HGNC Symbol;Acc:27321]	gene	overlapping	0	4.23837	2.91866	4.00894
C4ORF37	8	131181709	131215185	+	NaN	C4ORF37	ENSSSCG00000009188	Uncharacterized protein [Source:UniProtKB/TrEMBL;Acc:F1S0B8]	gene	overlapping	0	-2.99805	-2.30222	-2.64773
C4ORF40	8	148338546	148343591	+	NaN	C4ORF40	ENSSSCG00000009264	Uncharacterized protein [Source:UniProtKB/TrEMBL;Acc:F1RVB5]	gene	overlapping	0	-2.99805	-2.30222	-2.64773
C4ORF41	15	51604764	51656161	+	NaN	C4ORF41	ENSSSCG00000015777	Uncharacterized protein [Source:UniProtKB/TrEMBL;Acc:F1RT12]	gene	overlapping	0	4.0317	3.61451	4.23318
C4ORF43	8	55470822	55498954	+	NaN	C4ORF43	ENSSSCG00000008890	Uncharacterized protein [Source:UniProtKB/TrEMBL;Acc:F1RTW4]	gene	overlapping	0	4.67556	3.47471	5.14492
C4ORF44	8	1590856	1596528	+	NaN	C4ORF44	ENSSSCG00000008696	Uncharacterized protein [Source:UniProtKB/TrEMBL;Acc:F1S8N7]	gene	overlapping	0	-2.99805	-2.30222	-2.64773
C4ORF46	8	50009519	50013268	-	NaN	C4ORF46	ENSSSCG00000028492	Uncharacterized protein [Source:UniProtKB/TrEMBL;Acc:F1RW90]	gene	overlapping	0	1.58788	0.793021	0.975833
C4ORF48	8	643975	645889	+	NaN	POLN	ENSSSCG00000008684	polymerase (DNA directed) nu [Source:HGNC Symbol;Acc:18870]	gene	overlapping	0	1.54205	1.16687	2.83672
C4orf50	8	2534694	2556679	-	NaN	C4orf50	ENSSSCG00000008709	chromosome 4 open reading frame 50 [Source:HGNC Symbol;Acc:33766]	gene	overlapping	0	-2.99805	-2.30222	-2.64773
C560_PIG	4	96992135	97026507	-	NaN	SDHC	ENSSSCG00000030318	Succinate dehydrogenase cytochrome b560 subunit, mitochondrial [Source:UniProtKB/Swiss-Prot;Acc:D0VWV4]	gene	overlapping	0	5.71894	5.92843	5.83493
C5ORF13	2	122386529	122393187	+	NaN	C5ORF13	ENSSSCG00000025831	Uncharacterized protein [Source:UniProtKB/TrEMBL;Acc:F1RLG1]	gene	overlapping	0	-2.99805	-2.30222	-2.06874
C5ORF15	2	141861095	141873796	-	NaN	C5ORF15	ENSSSCG00000014295	Uncharacterized protein [Source:UniProtKB/TrEMBL;Acc:F1RI13]	gene	overlapping	0	3.67034	2.43321	3.2842
C5ORF22	16	18667261	18678721	+	NaN	C5ORF22	ENSSSCG00000016808	Uncharacterized protein [Source:UniProtKB/TrEMBL;Acc:F1SP40]	gene	overlapping	0	-1.45607	-2.25156	0.525852
C5orf24	2	142660878	142661444	+	NaN	C5orf24	ENSSSCG00000030393	chromosome 5 open reading frame 24 [Source:HGNC Symbol;Acc:26746]	gene	overlapping	0	-1.4054	-2.30222	-2.26373
C5ORF25	2	83187379	83236070	-	NaN	KIAA1191	ENSSSCG00000014060	KIAA1191 [Source:HGNC Symbol;Acc:29209]	gene	overlapping	0	3.64687	3.26669	4.50365
C5orf30	2	112821401	112822024	+	NaN	C5orf30	ENSSSCG00000024089	chromosome 5 open reading frame 30 [Source:HGNC Symbol;Acc:25052]	gene	overlapping	0	0.620912	-1.91822	-2.64773
C5ORF32	2	147857842	147953421	+	NaN	C5ORF32	ENSSSCG00000014361	Uncharacterized protein [Source:UniProtKB/TrEMBL;Acc:F1RGF2]	gene	overlapping	0	6.46769	6.00599	5.25096
C5ORF34	16	29633618	29646932	+	NaN	PAIP1	ENSSSCG00000016874	Uncharacterized protein [Source:UniProtKB/TrEMBL;Acc:F1SMG6]	gene	overlapping	0	-1.26108	1.19791	0.058197
C5ORF35	16	38246164	38253620	+	NaN	C5ORF35	ENSSSCG00000016919	Uncharacterized protein [Source:UniProtKB/TrEMBL;Acc:F1SLK8]	gene	overlapping	0	-1.89672	1.08786	2.51079
C5ORF39	16	29290647	29291186	+	NaN	C5ORF39	ENSSSCG00000016868	Uncharacterized protein [Source:UniProtKB/TrEMBL;Acc:F1SMH2]	gene	overlapping	0	-2.99805	-2.30222	-1.35141
C5ORF42	16	23534142	23613770	-	NaN	C5ORF42	ENSSSCG00000016843	Uncharacterized protein [Source:UniProtKB/TrEMBL;Acc:F1SN97]	gene	overlapping	0	0.598897	1.36541	-0.393253
C5ORF43	16	42880067	42880291	-	NaN	C5ORF43	ENSSSCG00000016935	Uncharacterized protein [Source:UniProtKB/TrEMBL;Acc:F2Z5N7]	gene	overlapping	0	1.7167	2.33257	2.13061
C5ORF44	16	47495894	47532763	+	NaN	C5ORF44	ENSSSCG00000016949	Uncharacterized protein [Source:UniProtKB/TrEMBL;Acc:F1SKT4]	gene	overlapping	0	2.5613	2.8049	0.159532
C5ORF45	2	80296800	80318894	+	NaN	C5ORF45	ENSSSCG00000014015	Uncharacterized protein [Source:UniProtKB/TrEMBL;Acc:F1S446]	gene	overlapping	0	3.35034	3.03276	2.88693
C5ORF46	2	155697431	155706959	-	NaN	C5ORF46	ENSSSCG00000014421	Uncharacterized protein [Source:UniProtKB/TrEMBL;Acc:F1RLZ4]	gene	overlapping	0	-2.99805	-2.30222	-2.64773
C5orf48	2	135025193	135029893	+	NaN	C5orf48	ENSSSCG00000027018	chromosome 5 open reading frame 48 [Source:HGNC Symbol;Acc:33767]	gene	overlapping	0	-2.89672	-2.20089	-1.21306
C5ORF49	16	80340668	80355095	+	NaN	C5ORF49	ENSSSCG00000017098	Uncharacterized protein [Source:UniProtKB/TrEMBL;Acc:F1S0T3]	gene	overlapping	0	-1.94738	-1.3899	-2.64773
C5ORF51	16	27945946	27962670	+	NaN	C5ORF51	ENSSSCG00000016864	Uncharacterized protein [Source:UniProtKB/TrEMBL;Acc:F1SMH6]	gene	overlapping	0	4.91999	5.46199	5.43284
C5ORF52	14	50655577	50661157	+	NaN	C5ORF52	ENSSSCG00000010014	Uncharacterized protein [Source:UniProtKB/TrEMBL;Acc:F1RPE1]	gene	overlapping	0	-2.99805	-2.30222	-2.64773
C5ORF58	16	58084387	58087690	-	NaN	C5ORF58	ENSSSCG00000017007	Uncharacterized protein [Source:UniProtKB/TrEMBL;Acc:F1RRX3]	gene	overlapping	0	-1.12274	1.02365	0.237495
C5ORF63	2	135348159	135359287	-	NaN	C5ORF63	ENSSSCG00000029089	Uncharacterized protein [Source:UniProtKB/TrEMBL;Acc:F1RKL8]	gene	overlapping	0	-2.36839	-2.25156	-1.5464
C5ORF65	2	147112697	147115756	-	NaN	C5ORF65	ENSSSCG00000014347	Uncharacterized protein [Source:UniProtKB/TrEMBL;Acc:F1RGH4]	gene	overlapping	0	-2.99805	-2.30222	-2.64773
C6ORF105	7	8584934	8628392	+	NaN	C6ORF105	ENSSSCG00000001048	Uncharacterized protein [Source:UniProtKB/TrEMBL;Acc:F1RV85]	gene	overlapping	0	-0.0276051	-1.04774	-1.82309
C6orf108	7	43764021	43767087	-	NaN	C6orf108	ENSSSCG00000026568	chromosome 6 open reading frame 108 [Source:HGNC Symbol;Acc:21218]	gene	overlapping	0	0.871592	1.22621	1.55524
C6ORF115	1	28570438	28585823	-	NaN	C6ORF115	ENSSSCG00000004145	Uncharacterized protein [Source:UniProtKB/TrEMBL;Acc:F1S6Z3]	gene	overlapping	0	5.5463	7.03713	5.16892
C6ORF118	1	4758551	4776214	+	NaN	C6ORF118	ENSSSCG00000004028	Uncharacterized protein [Source:UniProtKB/TrEMBL;Acc:F1SBW5]	gene	overlapping	0	-2.99805	-2.25156	-2.64773
C6ORF120	1	953108	955802	-	NaN	ENSSSCG00000030155	ENSSSCG00000030155	Uncharacterized protein [Source:UniProtKB/TrEMBL;Acc:F1SC16]	gene	overlapping	0	-2.99805	-2.30222	-2.64773
C6ORF120	1	1130148	1132842	+	NaN	ENSSSCG00000004008	ENSSSCG00000004008	No description	gene	overlapping	0	-2.99805	-2.30222	-2.64773
C6ORF126	7	36533600	36535664	+	NaN	C6ORF126	ENSSSCG00000001551	Uncharacterized protein [Source:UniProtKB/TrEMBL;Acc:F1RYX8]	gene	overlapping	0	-2.99805	-2.25156	-2.64773
C6ORF132	7	42581684	42683030	+	NaN	C6ORF132	ENSSSCG00000001634	Uncharacterized protein [Source:UniProtKB/TrEMBL;Acc:F1RUU7]	gene	overlapping	0	-0.658633	-1.09358	0.0710843
C6ORF141	7	49983168	49983749	+	NaN	C6ORF141	ENSSSCG00000001734	Uncharacterized protein [Source:UniProtKB/TrEMBL;Acc:F1RPZ8]	gene	overlapping	0	-2.99805	-2.20089	-2.64773
C6ORF145	7	2294630	2311843	-	NaN	C6ORF145	ENSSSCG00000025582	Uncharacterized protein [Source:UniProtKB/TrEMBL;Acc:F1RWZ1]	gene	overlapping	0	-2.99805	-1.53422	-2.64773
C6ORF163	1	62458926	62481489	+	NaN	C6ORF163	ENSSSCG00000004301	Uncharacterized protein [Source:UniProtKB/TrEMBL;Acc:F1S0G4]	gene	overlapping	0	-2.99805	-1.86755	-1.73541
C6ORF165	1	62517229	62545844	+	NaN	C6ORF165	ENSSSCG00000004302	Uncharacterized protein [Source:UniProtKB/TrEMBL;Acc:F1S0G3]	gene	overlapping	0	-1.5849	-1.33923	-1.05509
C6ORF170	1	45615048	45819794	+	NaN	C6ORF170	ENSSSCG00000004242	Uncharacterized protein [Source:UniProtKB/TrEMBL;Acc:F1SF42]	gene	overlapping	0	1.7055	1.62675	1.0842
C6orf183	1	84598999	84622404	+	NaN	C6orf183	ENSSSCG00000030406	chromosome 6 open reading frame 183 [Source:HGNC Symbol;Acc:21562]	gene	overlapping	0	-2.99805	-2.30222	-2.64773
C6ORF186	1	85731255	85811070	-	NaN	C6ORF186	ENSSSCG00000004402	Uncharacterized protein [Source:UniProtKB/TrEMBL;Acc:F1RSZ0]	gene	overlapping	0	-2.99805	-2.30222	-2.64773
C6ORF191	1	37026746	37036710	-	NaN	C6ORF191	ENSSSCG00000004204	Uncharacterized protein [Source:UniProtKB/TrEMBL;Acc:F1S307]	gene	overlapping	0	-2.99805	-2.30222	-2.64773
C6ORF192	1	34453175	34474149	+	NaN	C6ORF192	ENSSSCG00000004178	Uncharacterized protein [Source:UniProtKB/TrEMBL;Acc:F1S3R0]	gene	overlapping	0	-0.752395	-2.30222	-2.64773
C6ORF201	7	2500336	2513359	+	NaN	C6ORF201	ENSSSCG00000001001	Uncharacterized protein [Source:UniProtKB/TrEMBL;Acc:F1RWZ3]	gene	overlapping	0	-0.144253	-0.268935	-1.15642
C6ORF204	1	48621907	48789033	+	NaN	C6ORF204	ENSSSCG00000004249	Uncharacterized protein [Source:UniProtKB/TrEMBL;Acc:F1SF36]	gene	overlapping	0	2.78947	2.01373	2.14252
C6ORF221	1	59332573	59332984	+	NaN	C6ORF221	ENSSSCG00000004284	Uncharacterized protein [Source:UniProtKB/TrEMBL;Acc:F1RTS1]	gene	overlapping	0	-2.99805	-2.30222	-2.64773
C6ORF222	7	36937623	36949206	-	NaN	C6ORF222	ENSSSCG00000001560	Uncharacterized protein [Source:UniProtKB/TrEMBL;Acc:F1RY96]	gene	overlapping	0	-2.0116	-2.30222	-2.64773
C6ORF225	1	87730314	87732085	+	NaN	C6ORF225	ENSSSCG00000004424	Uncharacterized protein [Source:UniProtKB/TrEMBL;Acc:F1RZM5]	gene	overlapping	0	-2.99805	-2.30222	-2.64773
C6orf57	1	56995037	57010628	+	NaN	C6orf57	ENSSSCG00000026204	chromosome 6 open reading frame 57 [Source:HGNC Symbol;Acc:20957]	gene	overlapping	0	-1.73874	-2.25156	0.773389
C6ORF58	1	39200194	39218441	+	NaN	C6ORF58	ENSSSCG00000004213	Uncharacterized protein [Source:UniProtKB/TrEMBL;Acc:F1S2Y7]	gene	overlapping	0	-2.99805	-2.30222	-2.64773
C6ORF58	1	39226362	39246973	-	NaN	C6ORF58	ENSSSCG00000004212	Uncharacterized protein [Source:UniProtKB/TrEMBL;Acc:F1S2Y8]	gene	overlapping	0	-2.99805	-2.30222	-2.64773
C6ORF62	7	20661720	20675397	-	NaN	C6ORF62	ENSSSCG00000001094	Uncharacterized protein [Source:UniProtKB/TrEMBL;Acc:F1RUD9]	gene	overlapping	0	6.48312	5.81417	5.91993
C6ORF70	1	1068214	1092760	-	NaN	ENSSSCG00000004008	ENSSSCG00000004008	No description	gene	overlapping	0	1.38736	0.0447671	0.82668
C6ORF72	1	18690551	18702876	+	NaN	ENSSSCG00000021892	ENSSSCG00000021892	No description	gene	overlapping	0	-0.682096	-1.53422	-1.48975
C6orf72	1	18745774	18749865	-	NaN	PPIL4	ENSSSCG00000028867	Uncharacterized protein [Source:UniProtKB/TrEMBL;Acc:F1S7S4]	gene	overlapping	0	2.38605	2.31603	1.09806
C6ORF81	7	36518830	36529646	+	NaN	C6ORF81	ENSSSCG00000001550	Uncharacterized protein [Source:UniProtKB/TrEMBL;Acc:F1RYX9]	gene	overlapping	0	-2.99805	-2.30222	-2.64773
C6ORF89	7	37451398	37483062	+	NaN	C6ORF89	ENSSSCG00000001569	Uncharacterized protein [Source:UniProtKB/TrEMBL;Acc:F1RVT0]	gene	overlapping	0	1.88549	2.25364	1.9567
C6ORF94	1	23710688	23739608	-	NaN	C6ORF94	ENSSSCG00000004128	Uncharacterized protein [Source:UniProtKB/TrEMBL;Acc:F1S720]	gene	overlapping	0	-2.99805	-2.30222	-2.64773
C6ORF97	1	17070798	17164233	-	NaN	C6ORF97	ENSSSCG00000004087	Uncharacterized protein [Source:UniProtKB/TrEMBL;Acc:F1S7W4]	gene	overlapping	0	-2.99805	-2.30222	-2.64773
C7H6ORF12	7	25003404	25165750	+	NaN	C7H6ORF12	ENSSSCG00000028784	Uncharacterized protein [Source:UniProtKB/TrEMBL;Acc:F1RYH2]	gene	overlapping	0	-2.36839	-1.72323	-0.748958
C7H6ORF47	7	27476616	27478065	+	NaN	C7H6ORF47	ENSSSCG00000001412	Chromosome 7 open reading frame human C6orf47; Uncharacterized protein [Source:UniProtKB/TrEMBL;Acc:A5D9L5]	gene	overlapping	0	-2.0116	-1.0059	-1.35141
C7orf10	18	59557084	59557805	-	NaN	C7orf10	ENSSSCG00000020787	chromosome 7 open reading frame 10 [Source:HGNC Symbol;Acc:16001]	gene	overlapping	0	-2.99805	-2.30222	-2.64773
C7ORF11	18	59574866	59578243	+	NaN	C7ORF11	ENSSSCG00000016768	Uncharacterized protein [Source:UniProtKB/TrEMBL;Acc:F1SSC4]	gene	overlapping	0	3.33724	3.20721	3.5608
C7ORF23	9	102873679	102900245	+	NaN	C7ORF23	ENSSSCG00000025326	Uncharacterized protein [Source:UniProtKB/TrEMBL;Acc:F2Z5E5]	gene	overlapping	0	3.72231	3.64453	3.95134
C7ORF25	18	56949301	56951586	+	NaN	C7ORF25	ENSSSCG00000016760	Uncharacterized protein [Source:UniProtKB/TrEMBL;Acc:F1SSE3]	gene	overlapping	0	-2.08573	1.18123	-0.967408
C7ORF34	18	7553424	7554550	+	NaN	C7ORF34	ENSSSCG00000016471	Uncharacterized protein [Source:UniProtKB/TrEMBL;Acc:F1SRT8]	gene	overlapping	0	-2.99805	-2.30222	-2.64773
C7ORF42	3	16504924	16532546	-	NaN	C7ORF42	ENSSSCG00000007736	Uncharacterized protein [Source:UniProtKB/TrEMBL;Acc:F1RJI0]	gene	overlapping	0	4.73752	4.49213	5.21518
C7ORF43	3	7359855	7364060	+	NaN	C7ORF43	ENSSSCG00000007647	Uncharacterized protein [Source:UniProtKB/TrEMBL;Acc:F1RNN7]	gene	overlapping	0	0.864572	-0.93177	-2.64773
C7ORF44	18	56195631	56205539	+	NaN	C7ORF44	ENSSSCG00000016757	Uncharacterized protein [Source:UniProtKB/TrEMBL;Acc:F1SSF4]	gene	overlapping	0	0.592336	0.842206	0.0980576
C7ORF45	18	19683412	19692250	+	NaN	C7ORF45	ENSSSCG00000016562	Uncharacterized protein [Source:UniProtKB/TrEMBL;Acc:F1SMR9]	gene	overlapping	0	-2.99805	-2.30222	-2.64773
C7ORF49	18	14935740	14940095	+	NaN	C7ORF49	ENSSSCG00000016531	Uncharacterized protein [Source:UniProtKB/TrEMBL;Acc:F1SNI2]	gene	overlapping	0	-2.99805	-2.30222	-2.64773
C7orf50	3	723521	743194	+	NaN	C7orf50	ENSSSCG00000007546	chromosome 7 open reading frame 50 [Source:HGNC Symbol;Acc:22421]	gene	overlapping	0	-0.614885	-0.491127	-0.784596
C7ORF53	18	35904425	35907118	-	NaN	C7ORF53	ENSSSCG00000016645	Uncharacterized protein [Source:UniProtKB/TrEMBL;Acc:F1SJB1]	gene	overlapping	0	-2.99805	-2.30222	-2.26373
C7ORF58	18	27260302	27540733	-	NaN	C7ORF58	ENSSSCG00000016618	Uncharacterized protein [Source:UniProtKB/TrEMBL;Acc:F1SJF7]	gene	overlapping	0	-2.28072	-2.25156	-2.64773
C7ORF59	3	7364230	7366880	-	NaN	C7ORF59	ENSSSCG00000007646	Uncharacterized protein [Source:UniProtKB/TrEMBL;Acc:F1RNN8]	gene	overlapping	0	2.51632	2.62903	1.89215
C7orf60	18	35334560	35351722	-	NaN	C7orf60	ENSSSCG00000021466	chromosome 7 open reading frame 60 [Source:HGNC Symbol;Acc:26475]	gene	overlapping	0	-0.802953	-1.14425	-2.01808
C7orf61	3	7635317	7638176	-	NaN	C7orf61	ENSSSCG00000024967	chromosome 7 open reading frame 61 [Source:HGNC Symbol;Acc:22135]	gene	overlapping	0	-2.99805	-2.30222	-1.73541
C7orf62	9	75413026	75413787	-	NaN	C7orf62	ENSSSCG00000021276	chromosome 7 open reading frame 62 [Source:HGNC Symbol;Acc:22402]	gene	overlapping	0	-2.99805	-2.30222	-2.64773
C7ORF63	9	77078549	77083335	-	NaN	C7ORF63	ENSSSCG00000015303	Uncharacterized protein [Source:UniProtKB/TrEMBL;Acc:F1S335]	gene	overlapping	0	-2.99805	-2.30222	-2.64773
C7ORF64	9	79173391	79184054	+	NaN	C7ORF64	ENSSSCG00000015315	Uncharacterized protein [Source:UniProtKB/TrEMBL;Acc:F1SFC8]	gene	overlapping	0	2.53635	2.21044	3.24627
C7ORF72	9	149716424	149716864	+	NaN	C7ORF72	ENSSSCG00000015628	Uncharacterized protein [Source:UniProtKB/TrEMBL;Acc:F1SF27]	gene	overlapping	0	-2.99805	-2.30222	-2.64773
C7ORF74	9	117342025	117342987	-	NaN	C7ORF74	ENSSSCG00000015436	Uncharacterized protein [Source:UniProtKB/TrEMBL;Acc:F1SB32]	gene	overlapping	0	-2.08573	-2.30222	-2.64773
C8ORF33	4	89449	90614	-	NaN	C8ORF33	ENSSSCG00000005880	Uncharacterized protein [Source:UniProtKB/TrEMBL;Acc:F1RV56]	gene	overlapping	0	-2.99805	-1.14425	-1.48975
C8ORF34	4	72446096	72471083	-	NaN	C8ORF34	ENSSSCG00000006198	Uncharacterized protein [Source:UniProtKB/TrEMBL;Acc:F1RU05]	gene	overlapping	0	-2.61405	-2.30222	-2.64773
C8ORF37	4	44707161	44728142	-	NaN	C8ORF37	ENSSSCG00000006092	Uncharacterized protein [Source:UniProtKB/TrEMBL;Acc:F1RY59]	gene	overlapping	0	1.63467	-2.30222	-2.26373
C8ORF38	4	44871760	44907590	-	NaN	C8ORF38	ENSSSCG00000006093	Uncharacterized protein [Source:UniProtKB/TrEMBL;Acc:F1RY58]	gene	overlapping	0	1.6796	2.39294	3.2395
C8orf45	4	73911524	73950283	-	NaN	C8orf45	ENSSSCG00000006205	chromosome 8 open reading frame 45 [Source:HGNC Symbol;Acc:26368]	gene	overlapping	0	-2.41906	-1.58489	-1.44392
C8ORF46	4	74369542	74392471	-	NaN	C8ORF46	ENSSSCG00000023848	Uncharacterized protein [Source:UniProtKB/TrEMBL;Acc:F1RTZ2]	gene	overlapping	0	-1.17341	-1.31577	-2.64773
C8ORF47	4	41827650	41833182	-	NaN	C8ORF47	ENSSSCG00000006080	Uncharacterized protein [Source:UniProtKB/TrEMBL;Acc:F1S0M1]	gene	overlapping	0	0.207243	-1.14425	0.742353
C8ORF48	17	1408593	1409432	+	NaN	C8ORF48	ENSSSCG00000006972	Uncharacterized protein [Source:UniProtKB/TrEMBL;Acc:F1SEU2]	gene	overlapping	0	-2.99805	-2.30222	-2.64773
C8ORF59	4	56483974	56494340	+	NaN	C8ORF59	ENSSSCG00000006144	Uncharacterized protein [Source:UniProtKB/TrEMBL;Acc:F1RXB9]	gene	overlapping	0	4.69116	4.72723	5.28308
C8ORF73	4	1047605	1052341	+	NaN	C8ORF73	ENSSSCG00000006948	Uncharacterized protein [Source:UniProtKB/TrEMBL;Acc:F1SEW5]	gene	overlapping	0	-2.99805	-2.25156	-1.59706
C8ORF79	17	924793	947023	+	NaN	C8ORF79	ENSSSCG00000006969	Uncharacterized protein [Source:UniProtKB/TrEMBL;Acc:F1SEU5]	gene	overlapping	0	1.40891	-0.339234	-0.655588
C8ORF80	14	13007011	13051366	-	NaN	C8ORF80	ENSSSCG00000009673	Uncharacterized protein [Source:UniProtKB/TrEMBL;Acc:F1RJR4]	gene	overlapping	0	-2.99805	-2.30222	-2.64773
C8orf82	4	366934	368461	+	NaN	C8orf82	ENSSSCG00000005895	chromosome 8 open reading frame 82 [Source:HGNC Symbol;Acc:33826]	gene	overlapping	0	-1.03506	-2.25156	-1.35141
C8ORF84	4	68314290	68336217	+	NaN	C8ORF84	ENSSSCG00000006183	Uncharacterized protein [Source:UniProtKB/TrEMBL;Acc:F1RWI4]	gene	overlapping	0	-2.99805	-2.25156	-2.64773
C8ORF85	4	22984733	22989693	-	NaN	C8ORF85	ENSSSCG00000006013	Uncharacterized protein [Source:UniProtKB/TrEMBL;Acc:F1S1K2]	gene	overlapping	0	-2.99805	-2.30222	-2.64773
C9orf102	10	30361798	30451587	-	NaN	C9orf102	ENSSSCG00000010941	chromosome 9 open reading frame 102 [Source:HGNC Symbol;Acc:26922]	gene	overlapping	0	1.64822	2.4519	1.41922
C9orf103	10	35416363	35427615	-	NaN	C9orf103	ENSSSCG00000022077	chromosome 9 open reading frame 103 [Source:HGNC Symbol;Acc:31367]	gene	overlapping	0	-0.222593	0.711434	1.93274
C9ORF114	1	303173471	303183167	-	NaN	ENDOG	ENSSSCG00000005661	Uncharacterized protein [Source:UniProtKB/TrEMBL;Acc:F1RR64]	gene	overlapping	0	-1.04861	0.48541	0.145875
C9ORF116	1	308630224	308634807	-	NaN	C9ORF116	ENSSSCG00000005760	Uncharacterized protein [Source:UniProtKB/TrEMBL;Acc:F1S000]	gene	overlapping	0	-2.99805	-2.30222	-2.64773
C9ORF117	1	302101845	302105493	+	NaN	C9ORF117	ENSSSCG00000005618	Uncharacterized protein [Source:UniProtKB/TrEMBL;Acc:F1RS10]	gene	overlapping	0	-2.99805	-2.30222	-2.59706
C9ORF123	1	239641566	239643734	-	NaN	C9ORF123	ENSSSCG00000005196	Uncharacterized protein [Source:UniProtKB/TrEMBL;Acc:F1SMP1]	gene	overlapping	0	-2.89672	-1.33923	-0.364957
C9ORF125	1	271617978	271620272	+	NaN	C9ORF125	ENSSSCG00000005396	Uncharacterized protein [Source:UniProtKB/TrEMBL;Acc:F1SSB3]	gene	overlapping	0	-2.99805	-2.30222	-2.64773
C9ORF128	1	264264300	264272975	-	NaN	C9ORF128	ENSSSCG00000005324	Uncharacterized protein [Source:UniProtKB/TrEMBL;Acc:F1STB1]	gene	overlapping	0	-2.99805	-2.30222	-2.64773
C9ORF131	1	263370396	263374351	+	NaN	C9ORF131	ENSSSCG00000005298	Uncharacterized protein [Source:UniProtKB/TrEMBL;Acc:F1SIH9]	gene	overlapping	0	-2.99805	-0.144246	-0.264567
C9ORF135	1	249336437	249382659	-	NaN	C9ORF135	ENSSSCG00000005251	Uncharacterized protein [Source:UniProtKB/TrEMBL;Acc:F1SJD1]	gene	overlapping	0	-2.99805	-2.30222	-2.64773
C9ORF152	1	281973738	281981141	-	NaN	C9ORF152	ENSSSCG00000005452	Uncharacterized protein [Source:UniProtKB/TrEMBL;Acc:F1SP05]	gene	overlapping	0	-2.08573	-2.30222	-2.64773
C9ORF153	10	33136193	33141504	+	NaN	C9ORF153	ENSSSCG00000010954	Uncharacterized protein [Source:UniProtKB/TrEMBL;Acc:F1S4I3]	gene	overlapping	0	-2.99805	-2.30222	-2.64773
C9orf16	1	302606724	302610204	+	NaN	C9orf16	ENSSSCG00000022295	chromosome 9 open reading frame 16 [Source:HGNC Symbol;Acc:17823]	gene	overlapping	0	2.54537	2.21171	2.09997
C9ORF167	1	314112197	314114510	-	NaN	C9ORF167	ENSSSCG00000005845	Uncharacterized protein [Source:UniProtKB/TrEMBL;Acc:F1RVY0]	gene	overlapping	0	-2.99805	-2.30222	-1.54042
C9ORF169	1	314147913	314151525	-	NaN	C9ORF169	ENSSSCG00000005857	Uncharacterized protein [Source:UniProtKB/TrEMBL;Acc:F1RVW1]	gene	overlapping	0	-2.99805	-2.30222	-2.64773
C9ORF171	1	306333931	306368383	+	NaN	C9ORF171	ENSSSCG00000005727	Uncharacterized protein [Source:UniProtKB/TrEMBL;Acc:F1S0U2]	gene	overlapping	0	-2.99805	-2.30222	-2.64773
C9orf173	1	314127869	314129744	-	NaN	C9orf173	ENSSSCG00000005847	chromosome 9 open reading frame 173 [Source:HGNC Symbol;Acc:37285]	gene	overlapping	0	-2.99805	-2.30222	-2.64773
C9orf174	1	267252681	267327315	+	NaN	C9orf174	ENSSSCG00000025655	chromosome 9 open reading frame 174 [Source:HGNC Symbol;Acc:29303]	gene	overlapping	0	-2.99805	-2.30222	-2.64773
C9ORF21	10	76568591	76584978	-	NaN	C9ORF21	ENSSSCG00000011169	Uncharacterized protein [Source:UniProtKB/TrEMBL;Acc:F1RX39]	gene	overlapping	0	-1.54375	0.48541	1.41471
C9ORF23	10	36330148	36331804	+	NaN	C9ORF23	ENSSSCG00000010973	Uncharacterized protein [Source:UniProtKB/TrEMBL;Acc:F1SEB9]	gene	overlapping	0	0.846225	1.12104	0.442198
C9ORF24	10	36589391	36604287	+	NaN	C9ORF24	ENSSSCG00000010980	Uncharacterized protein [Source:UniProtKB/TrEMBL;Acc:F1SEB3]	gene	overlapping	0	-2.99805	-2.30222	-1.40208
C9ORF30	1	270529121	270554397	+	NaN	C9ORF30	ENSSSCG00000005390	Uncharacterized protein [Source:UniProtKB/TrEMBL;Acc:F1SSC9]	gene	overlapping	0	-2.99805	-1.31577	-0.417345
C9ORF4	1	280723682	280750058	-	NaN	C9ORF4	ENSSSCG00000005445	Uncharacterized protein [Source:UniProtKB/TrEMBL;Acc:F1SP13]	gene	overlapping	0	-2.99805	-2.30222	-2.64773
C9ORF40	1	254937355	254944245	-	NaN	C9ORF40	ENSSSCG00000025640	Uncharacterized protein [Source:UniProtKB/TrEMBL;Acc:F1SJA4]	gene	overlapping	0	5.22986	5.2262	6.28967
C9ORF41	1	254954110	254991565	-	NaN	C9ORF41	ENSSSCG00000005271	Uncharacterized protein [Source:UniProtKB/TrEMBL;Acc:F1SJA3]	gene	overlapping	0	3.55078	4.23715	4.37592
C9ORF43	1	284834363	284852129	+	NaN	C9ORF43	ENSSSCG00000005479	Uncharacterized protein [Source:UniProtKB/TrEMBL;Acc:F1SN87]	gene	overlapping	0	-2.99805	-2.30222	-2.64773
C9ORF5	1	280616530	280711075	-	NaN	C9ORF5	ENSSSCG00000005444	Uncharacterized protein [Source:UniProtKB/TrEMBL;Acc:F1SP24]	gene	overlapping	0	3.13411	3.4077	2.36156
C9ORF50	1	303804123	303806765	+	NaN	C9ORF50	ENSSSCG00000005674	Uncharacterized protein [Source:UniProtKB/TrEMBL;Acc:F1RR43]	gene	overlapping	0	-1.6276	-2.30222	-2.64773
C9ORF6	1	280429179	280435855	-	NaN	C9ORF6	ENSSSCG00000005440	Uncharacterized protein [Source:UniProtKB/TrEMBL;Acc:F1SP28]	gene	overlapping	0	1.74017	0.806568	2.36908
C9orf64	10	35064166	35077036	-	NaN	C9orf64	ENSSSCG00000026291	chromosome 9 open reading frame 64 [Source:HGNC Symbol;Acc:28144]	gene	overlapping	0	2.83096	3.44466	2.11793
C9ORF68	1	243198175	243203157	+	NaN	C9ORF68	ENSSSCG00000005221	Uncharacterized protein [Source:UniProtKB/TrEMBL;Acc:F1SK42]	gene	overlapping	0	-2.99805	-2.30222	-2.64773
C9ORF71	1	248148192	248155279	-	NaN	C9ORF71	ENSSSCG00000029363	Uncharacterized protein [Source:UniProtKB/TrEMBL;Acc:F1SJE5]	gene	overlapping	0	-2.61405	-1.67257	-2.06874
C9ORF72	10	43532131	43558709	+	NaN	C9ORF72	ENSSSCG00000011010	Uncharacterized protein [Source:UniProtKB/TrEMBL;Acc:F1SE55]	gene	overlapping	0	3.73573	3.71713	3.5197
C9orf78	1	303883684	303892770	-	NaN	C9orf78	ENSSSCG00000030426	chromosome 9 open reading frame 78 [Source:HGNC Symbol;Acc:24932]	gene	overlapping	0	3.8289	4.52367	4.73301
C9ORF80	1	284184364	284203430	-	NaN	C9ORF80	ENSSSCG00000026194	Uncharacterized protein [Source:UniProtKB/TrEMBL;Acc:F1SNA6]	gene	overlapping	0	4.11561	4.18718	5.00426
C9ORF82	1	218678023	218722657	+	NaN	C9ORF82	ENSSSCG00000005127	Uncharacterized protein [Source:UniProtKB/TrEMBL;Acc:F1SP80]	gene	overlapping	0	1.31915	2.95971	2.31316
C9ORF84	1	283272991	283277480	-	NaN	C9ORF84	ENSSSCG00000005463	Uncharacterized protein [Source:UniProtKB/TrEMBL;Acc:F1SNB2]	gene	overlapping	0	-2.61405	-2.30222	-2.64773
C9orf85	1	251759569	251826139	+	NaN	C9orf85	ENSSSCG00000021531	chromosome 9 open reading frame 85 [Source:HGNC Symbol;Acc:28784]	gene	overlapping	0	0.502084	0.818743	1.20186
C9ORF86	1	313920658	313928723	-	NaN	C9ORF86	ENSSSCG00000005841	Uncharacterized protein [Source:UniProtKB/TrEMBL;Acc:F1RVY4]	gene	overlapping	0	2.61119	1.60538	1.38072
C9ORF9	1	306779660	306788316	+	NaN	GTF3C5	ENSSSCG00000005739	Uncharacterized protein [Source:UniProtKB/TrEMBL;Acc:F1S0S0]	gene	overlapping	0	-2.99805	-2.30222	-2.64773
C9ORF9	1	306919984	306923953	+	NaN	GTF3C5	ENSSSCG00000005739	Uncharacterized protein [Source:UniProtKB/TrEMBL;Acc:F1S0S0]	gene	overlapping	0	-2.99805	-2.30222	-2.64773
C9orf91	1	286220699	286241331	-	NaN	C9orf91	ENSSSCG00000005492	chromosome 9 open reading frame 91 [Source:HGNC Symbol;Acc:24513]	gene	overlapping	0	-1.78941	-0.214435	-1.63407
C9ORF93	1	230579087	230677064	-	NaN	C9ORF93	ENSSSCG00000005182	Uncharacterized protein [Source:UniProtKB/TrEMBL;Acc:F1SMR4]	gene	overlapping	0	-2.61405	-2.30222	-2.64773
C9ORF95	1	255013556	255035935	-	NaN	C9ORF95	ENSSSCG00000005272	Uncharacterized protein [Source:UniProtKB/TrEMBL;Acc:F1SJA2]	gene	overlapping	0	-2.99805	-2.30222	-2.64773
CA1	4	56358291	56369035	+	NaN	CA1	ENSSSCG00000006142	Uncharacterized protein [Source:UniProtKB/TrEMBL;Acc:F1RXC1]	gene	overlapping	0	-2.99805	-2.30222	-2.64773
CA10	12	28270012	28376174	-	NaN	CA10	ENSSSCG00000023169	carbonic anhydrase X [Source:HGNC Symbol;Acc:1369]	gene	overlapping	0	-2.99805	-2.30222	-2.64773
CA12	1	119861130	119869383	+	NaN	CA12	ENSSSCG00000004565	Uncharacterized protein [Source:UniProtKB/TrEMBL;Acc:F1S092]	gene	overlapping	0	-2.99805	-2.30222	-2.64773
CA13	4	56424376	56464499	-	NaN	CA13	ENSSSCG00000006143	Uncharacterized protein [Source:UniProtKB/TrEMBL;Acc:F1RXC0]	gene	overlapping	0	-2.56338	-2.30222	-2.64773
CA2	4	56156732	56174841	-	NaN	CA2	ENSSSCG00000006140	Uncharacterized protein [Source:UniProtKB/TrEMBL;Acc:F1RXC2]	gene	overlapping	0	-1.26108	-0.18609	1.10886
CA5B	X	13188041	13224941	+	NaN	CA5B	ENSSSCG00000012141	carbonic anhydrase VB, mitochondrial [Source:HGNC Symbol;Acc:1378]	gene	overlapping	0	-2.99805	-2.30222	-2.64773
CA8	4	79510026	79581189	+	NaN	CA8	ENSSSCG00000006233	Uncharacterized protein [Source:UniProtKB/TrEMBL;Acc:F1RT86]	gene	overlapping	0	-2.99805	-0.534222	-2.64773
CA9	1	264119361	264126033	+	NaN	CA9	ENSSSCG00000005315	Uncharacterized protein [Source:UniProtKB/TrEMBL;Acc:F1SG01]	gene	overlapping	0	-0.534228	-1.91822	1.09532
CAB39	15	145171298	145263529	+	NaN	CAB39	ENSSSCG00000016266	Uncharacterized protein [Source:UniProtKB/TrEMBL;Acc:F1SMX5]	gene	overlapping	0	6.69146	6.69414	7.12218
CAB39L	11	18628807	18716116	+	NaN	CAB39L	ENSSSCG00000009397	Uncharacterized protein [Source:UniProtKB/TrEMBL;Acc:F1RK18]	gene	overlapping	0	2.73829	2.81117	1.98152
CABIN1	14	53128137	53229952	-	NaN	CABIN1	ENSSSCG00000010062	Uncharacterized protein [Source:UniProtKB/TrEMBL;Acc:F1RL39]	gene	overlapping	0	2.25285	2.52347	2.81282
CABLES1	6	100634610	100795673	+	NaN	CABLES1	ENSSSCG00000003705	Uncharacterized protein [Source:UniProtKB/TrEMBL;Acc:F1SBB7]	gene	overlapping	0	-0.543751	-0.955233	-2.64773
CABLES2	17	69173975	69187538	-	NaN	CABLES2	ENSSSCG00000007540	Cdk5 and Abl enzyme substrate 2 [Source:HGNC Symbol;Acc:16143]	gene	overlapping	0	1.08107	1.71487	1.96244
CABP1	14	43039682	43055094	+	NaN	CABP1	ENSSSCG00000009913	Uncharacterized protein [Source:UniProtKB/TrEMBL;Acc:F1RJI3]	gene	overlapping	0	-2.99805	-2.30222	-2.64773
CABP2	2	3734833	3739060	+	NaN	CABP2	ENSSSCG00000020764	Uncharacterized protein [Source:UniProtKB/TrEMBL;Acc:F1RVM7]	gene	overlapping	0	-2.99805	-2.30222	-2.64773
CABP4	2	3787774	3790770	-	NaN	CABP4	ENSSSCG00000012906	Uncharacterized protein [Source:UniProtKB/TrEMBL;Acc:F1RUZ4]	gene	overlapping	0	-2.99805	-2.30222	-2.64773
CABP5	6	49191353	49202212	-	NaN	CABP5	ENSSSCG00000003126	Uncharacterized protein [Source:UniProtKB/TrEMBL;Acc:F1RLA1]	gene	overlapping	0	-2.99805	-2.30222	-2.64773
CABYR	6	101640572	101662408	+	NaN	CABYR	ENSSSCG00000003711	Uncharacterized protein [Source:UniProtKB/TrEMBL;Acc:F1SBB1]	gene	overlapping	0	-2.0116	-1.91822	-2.26373
CACFD1	1	307030425	307039181	+	NaN	CACFD1	ENSSSCG00000021113	calcium channel flower domain containing 1 [Source:HGNC Symbol;Acc:1365]	gene	overlapping	0	-2.99805	-2.30222	-2.64773
CACHD1	6	136116938	136181931	-	NaN	CACHD1	ENSSSCG00000004829	cache domain containing 1 [Source:HGNC Symbol;Acc:29314]	gene	overlapping	0	-2.28072	-2.30222	-2.06874
CACNA1A	2	65921412	66176317	+	NaN	CACNA1A	ENSSSCG00000013754	Uncharacterized protein [Source:UniProtKB/TrEMBL;Acc:F1SD80]	gene	overlapping	0	-2.99805	-2.30222	-2.64773
CACNA1C	5	71597106	71682658	+	NaN	CACNA1C	ENSSSCG00000000763	Uncharacterized protein [Source:UniProtKB/TrEMBL;Acc:F1SHR7]	gene	overlapping	0	-2.99805	-2.30222	-2.64773
CACNA1C	5	71756585	71817700	-	NaN	CACNA1C	ENSSSCG00000027725	calcium channel, voltage-dependent, L type, alpha 1C subunit [Source:HGNC Symbol;Acc:1390]	gene	overlapping	0	-2.99805	-2.30222	-2.64773
CACNA1D	13	38940633	38980318	+	NaN	CACNA1D	ENSSSCG00000011455	Uncharacterized protein [Source:UniProtKB/TrEMBL;Acc:F1SH90]	gene	overlapping	0	-2.61405	-2.30222	-2.64773
CACNA1E	9	135109023	135468520	+	NaN	CACNA1E	ENSSSCG00000015543	calcium channel, voltage-dependent, R type, alpha 1E subunit [Source:HGNC Symbol;Acc:1392]	gene	overlapping	0	-2.17341	-0.760245	-1.27728
CACNA1F	X	48099313	48131935	-	NaN	CACNA1F	ENSSSCG00000012298	Uncharacterized protein [Source:UniProtKB/TrEMBL;Acc:F1RW39]	gene	overlapping	0	-2.99805	-2.30222	-2.64773
CACNA1G	12	26991573	27052564	+	NaN	CACNA1G	ENSSSCG00000017562	Uncharacterized protein [Source:UniProtKB/TrEMBL;Acc:F1RTA0]	gene	overlapping	0	-0.738738	-1.15022	-2.64773
CACNA1I	5	5899444	5963947	-	NaN	CACNA1I	ENSSSCG00000000082	Uncharacterized protein [Source:UniProtKB/TrEMBL;Acc:F1SR99]	gene	overlapping	0	-2.94738	-2.30222	-2.64773
CACNA1S	10	27935052	27999300	-	NaN	CACNA1S	ENSSSCG00000024784	calcium channel, voltage-dependent, L type, alpha 1S subunit [Source:HGNC Symbol;Acc:1397]	gene	overlapping	0	-2.99805	-0.483554	-2.64773
CACNA2D2	13	36023303	36056404	-	NaN	CACNA2D2	ENSSSCG00000011412	Uncharacterized protein [Source:UniProtKB/TrEMBL;Acc:F1SJ19]	gene	overlapping	0	-0.672573	-0.0935787	-2.59706
CACNA2D4	5	70992973	70995680	+	NaN	CACNA2D4	ENSSSCG00000000758	Uncharacterized protein [Source:UniProtKB/TrEMBL;Acc:F1SHS1]	gene	overlapping	0	-0.87111	-1.67257	-2.64773
CACNB1	12	23491239	23513358	+	NaN	CACNB1	ENSSSCG00000017510	Uncharacterized protein [Source:UniProtKB/TrEMBL;Acc:F1RWK8]	gene	overlapping	0	-2.61405	-1.01808	-1.68474
CACNB2	10	49568428	49626681	+	NaN	CACNB2	ENSSSCG00000011040	Uncharacterized protein [Source:UniProtKB/TrEMBL;Acc:F1RWA1]	gene	overlapping	0	3.53667	2.89099	2.56198
CACNB3	5	15172903	15182025	+	NaN	CACNB3	ENSSSCG00000000176	Uncharacterized protein [Source:UniProtKB/TrEMBL;Acc:F1SPN4]	gene	overlapping	0	-0.381942	-2.25156	-2.59706
CACNG2	5	8848046	8866321	+	NaN	CACNG2	ENSSSCG00000000140	Uncharacterized protein [Source:UniProtKB/TrEMBL;Acc:F1SKJ6]	gene	overlapping	0	-2.99805	-2.30222	-2.64773
CACNG3	3	22760121	22865146	-	NaN	CACNG3	ENSSSCG00000007831	Uncharacterized protein [Source:UniProtKB/TrEMBL;Acc:F1RFC9]	gene	overlapping	0	-2.99805	-2.30222	-2.64773
CACNG4	12	13761250	13824567	+	NaN	CACNG4	ENSSSCG00000023102	Uncharacterized protein [Source:UniProtKB/TrEMBL;Acc:F1RV12]	gene	overlapping	0	-2.28072	-2.30222	-2.64773
CACNG5	12	13690455	13696840	+	NaN	CACNG5	ENSSSCG00000017269	Uncharacterized protein [Source:UniProtKB/TrEMBL;Acc:F1RV13]	gene	overlapping	0	-2.99805	-2.30222	-2.64773
CACNG6	6	53065418	53085267	+	NaN	CACNG6	ENSSSCG00000003257	Uncharacterized protein [Source:UniProtKB/TrEMBL;Acc:F1RNI9]	gene	overlapping	0	-2.99805	-2.30222	-2.64773
CACNG7	6	53006539	53026942	+	NaN	CACNG7	ENSSSCG00000025532	Uncharacterized protein [Source:UniProtKB/TrEMBL;Acc:F2Z4Y2]	gene	overlapping	0	-2.94738	-2.30222	-2.06874
CACNG8	6	53043022	53058038	+	NaN	CACNG8	ENSSSCG00000003255	Uncharacterized protein [Source:UniProtKB/TrEMBL;Acc:F1RNJ2]	gene	overlapping	0	-2.99805	-2.30222	-2.64773
CACYBP	9	128737810	128751841	-	NaN	CACYBP	ENSSSCG00000015504	Uncharacterized protein [Source:UniProtKB/TrEMBL;Acc:F1S710]	gene	overlapping	0	4.58733	5.1019	6.77344
CADH3_PIG	6	16844453	16853458	+	NaN	CDH3	ENSSSCG00000023162	Cadherin-3 [Source:UniProtKB/Swiss-Prot;Acc:O18926]	gene	overlapping	0	-2.99805	-2.30222	-1.5464
CADM1	9	47736807	47769324	+	NaN	CADM1	ENSSSCG00000015063	cell adhesion molecule 1 [Source:HGNC Symbol;Acc:5951]	gene	overlapping	0	-2.99805	-2.30222	-2.64773
CADM2	13	180751367	180942328	-	NaN	CADM2	ENSSSCG00000011999	cell adhesion molecule 2 [Source:HGNC Symbol;Acc:29849]	gene	overlapping	0	-2.99805	-2.30222	-2.64773
CADM3	4	99226827	99257918	-	NaN	CADM3	ENSSSCG00000006415	Uncharacterized protein [Source:UniProtKB/TrEMBL;Acc:F1RJ23]	gene	overlapping	0	-2.99805	-2.30222	-2.64773
CADM4	6	46217032	46327364	-	NaN	CADM4	ENSSSCG00000003061	Uncharacterized protein [Source:UniProtKB/TrEMBL;Acc:F1RMV8]	gene	overlapping	0	-2.28072	-1.20089	-2.06874
CADPS	13	48055325	48058862	+	NaN	CADPS	ENSSSCG00000011488	Ca++-dependent secretion activator [Source:HGNC Symbol;Acc:1426]	gene	overlapping	0	-2.99805	-2.30222	-2.64773
CADPS2	18	25969510	26464357	+	NaN	CADPS2	ENSSSCG00000016611	Uncharacterized protein [Source:UniProtKB/TrEMBL;Acc:F1SLX7]	gene	overlapping	0	-0.0660975	1.11023	2.47135
CAH11_PIG	6	49740728	49745975	-	NaN	CA11	ENSSSCG00000003147	Carbonic anhydrase-related protein 11 [Source:UniProtKB/Swiss-Prot;Acc:Q866X6]	gene	overlapping	0	-2.99805	-2.30222	-2.64773
CAH3_PIG	4	56190397	56200944	-	NaN	CA3	ENSSSCG00000006141	Carbonic anhydrase 3 [Source:UniProtKB/Swiss-Prot;Acc:Q5S1S4]	gene	overlapping	0	-2.99805	-2.30222	-2.64773
CALC_PIG	2	47250856	47253878	-	NaN	CALCA	ENSSSCG00000026512	Calcitonin gene-related peptide [Source:UniProtKB/Swiss-Prot;Acc:P30880]	gene	overlapping	0	-2.99805	-2.30222	-2.64773
CALCA_PIG	2	47248412	47253878	-	NaN	CALCA	ENSSSCG00000026512	Calcitonin gene-related peptide [Source:UniProtKB/Swiss-Prot;Acc:P30880]	gene	overlapping	0	-2.99805	-2.30222	-2.64773
CALCOCO1	5	19356305	19375156	+	NaN	CALCOCO1	ENSSSCG00000028481	calcium binding and coiled-coil domain 1 [Source:HGNC Symbol;Acc:29306]	gene	overlapping	0	2.64612	1.50239	-0.87973
CALCOCO2	12	25005401	25036657	+	NaN	CALCOCO2	ENSSSCG00000017543	Uncharacterized protein [Source:UniProtKB/TrEMBL;Acc:F1RWF7]	gene	overlapping	0	5.01578	4.26112	1.83194
CALCR_PIG	9	80111374	80163883	-	NaN	CALCR	ENSSSCG00000015320	Calcitonin receptor [Source:UniProtKB/Swiss-Prot;Acc:P25117]	gene	overlapping	0	-2.08573	-1.53422	-1.87973
CALD1	18	15075829	15194597	-	NaN	CALD1	ENSSSCG00000016535	Uncharacterized protein [Source:UniProtKB/TrEMBL;Acc:F1SNH3]	gene	overlapping	0	8.31746	7.55463	7.47535
CALM3	8	117991436	117991885	+	NaN	CALM3	ENSSSCG00000009126	Uncharacterized protein [Source:UniProtKB/TrEMBL;Acc:F1S145]	gene	overlapping	0	-2.99805	-2.30222	-2.64773
CALML4	1	183861562	183864988	-	NaN	PIAS1	ENSSSCG00000004958	Uncharacterized protein [Source:UniProtKB/TrEMBL;Acc:F1SJH4]	gene	overlapping	0	-2.99805	-2.30222	-2.64773
CALML5	10	71522046	71522492	+	NaN	CALML5	ENSSSCG00000011141	Uncharacterized protein [Source:UniProtKB/TrEMBL;Acc:F1RYW2]	gene	overlapping	0	-2.99805	-2.30222	-2.64773
CALML5	10	71777268	71778067	+	NaN	CALML5	ENSSSCG00000023092	Uncharacterized protein [Source:UniProtKB/TrEMBL;Acc:F1RYW2]	gene	overlapping	0	-2.99805	-2.30222	-1.82309
CALML6	6	58548995	58549671	-	NaN	CALML6	ENSSSCG00000028926	calmodulin-like 6 [Source:HGNC Symbol;Acc:24193]	gene	overlapping	0	-2.99805	-2.30222	-2.64773
CALN1	3	15865928	16190523	-	NaN	CALN1	ENSSSCG00000007730	calneuron 1 [Source:HGNC Symbol;Acc:13248]	gene	overlapping	0	-2.99805	-2.30222	-2.64773
CALR_PIG	2	66283789	66287601	+	NaN	CALR	ENSSSCG00000013746	Calreticulin [Source:UniProtKB/Swiss-Prot;Acc:P28491]	gene	overlapping	0	8.22825	8.39856	8.12171
CALR3	2	60738215	60767262	+	NaN	CALR3	ENSSSCG00000013858	Uncharacterized protein [Source:UniProtKB/TrEMBL;Acc:F1S9W5]	gene	overlapping	0	-1.26108	-2.30222	-2.01808
CALRL_PIG	15	102429017	102469728	-	NaN	CALCRL	ENSSSCG00000016031	Calcitonin gene-related peptide type 1 receptor [Source:UniProtKB/Swiss-Prot;Acc:Q8WN93]	gene	overlapping	0	-1.39943	0.768076	-0.943945
CALU	18	20911133	20945201	-	NaN	CALU	ENSSSCG00000016581	Uncharacterized protein [Source:UniProtKB/TrEMBL;Acc:F1SMN0]	gene	overlapping	0	4.59418	5.12435	4.88069
CALY	14	153271904	153275466	-	NaN	CALY	ENSSSCG00000010776	Uncharacterized protein [Source:UniProtKB/TrEMBL;Acc:F1SCU7]	gene	overlapping	0	-2.99805	-2.30222	-2.64773
CAMK2B	18	55837904	55849658	+	NaN	CAMK2B	ENSSSCG00000016748	Uncharacterized protein [Source:UniProtKB/TrEMBL;Acc:F1SSH3]	gene	overlapping	0	-2.99805	-2.30222	-2.64773
CAMK2G	14	82663521	82719243	-	NaN	CAMK2G	ENSSSCG00000010311	calcium/calmodulin-dependent protein kinase type II subunit gamma [Source:RefSeq peptide;Acc:NP_999358]	gene	overlapping	0	-2.36839	0.599089	-1.82906
CAMK2N1	6	72919002	72922818	-	NaN	CAMK2N1	ENSSSCG00000024009	Uncharacterized protein [Source:UniProtKB/TrEMBL;Acc:F1SU15]	gene	overlapping	0	-1.18695	0.158051	-0.193432
CAMK2N2	13	131596811	131597937	-	NaN	ECE2	ENSSSCG00000025067	endothelin converting enzyme 2 [Source:HGNC Symbol;Acc:13275]	gene	overlapping	0	-2.99805	-2.30222	-2.64773
CAMK4	2	120787641	120817434	+	NaN	CAMK4	ENSSSCG00000023497	Uncharacterized protein [Source:UniProtKB/TrEMBL;Acc:F1RLI2]	gene	overlapping	0	0.118892	0.226207	0.84506
CAMKK1	12	51738491	51756678	-	NaN	ITGAE	ENSSSCG00000017869	Uncharacterized protein [Source:UniProtKB/TrEMBL;Acc:F1RGS4]	gene	overlapping	0	-0.122739	1.34706	-1.44392
CAMKK2	14	33175171	33229777	+	NaN	CAMKK2	ENSSSCG00000009815	Uncharacterized protein [Source:UniProtKB/TrEMBL;Acc:F1RNP6]	gene	overlapping	0	-0.115283	0.0137306	-1.08921
CAMKMT	3	102222587	102248381	-	NaN	CAMKMT	ENSSSCG00000008447	Uncharacterized protein [Source:UniProtKB/TrEMBL;Acc:F1S5K4]	gene	overlapping	0	-2.99805	-1.72323	-1.82309
CAMKV	13	35561847	35573733	-	NaN	CAMKV	ENSSSCG00000025416	CaM kinase-like vesicle-associated [Source:HGNC Symbol;Acc:28788]	gene	overlapping	0	-1.6276	-1.25156	-0.0765996
CAMLG	2	142573815	142576117	+	NaN	CAMLG	ENSSSCG00000014306	Uncharacterized protein [Source:UniProtKB/TrEMBL;Acc:F1RHC6]	gene	overlapping	0	-2.17341	-0.955233	-1.10575
CAMSAP1	1	308851696	308882338	-	NaN	CAMSAP1	ENSSSCG00000005753	Uncharacterized protein [Source:UniProtKB/TrEMBL;Acc:F1S018]	gene	overlapping	0	3.67647	3.0265	1.76691
CAMSAP2	10	27745697	27799989	-	NaN	CAMSAP2	ENSSSCG00000027314	calmodulin regulated spectrin-associated protein family, member 2 [Source:HGNC Symbol;Acc:29188]	gene	overlapping	0	4.32485	3.95661	1.35612
CAMSAP3	2	71891799	71901047	+	NaN	CAMSAP3	ENSSSCG00000013583	calmodulin regulated spectrin-associated protein family, member 3 [Source:HGNC Symbol;Acc:29307]	gene	overlapping	0	3.2139	2.70027	3.36121
CAMTA2	12	54000739	54016605	+	NaN	CAMTA2	ENSSSCG00000017902	Uncharacterized protein [Source:UniProtKB/TrEMBL;Acc:F1RFY4]	gene	overlapping	0	2.72936	3.34405	3.05669
CAN1_PIG	2	6129549	6155373	-	NaN	CAPN1	ENSSSCG00000012999	Calpain-1 catalytic subunit [Source:UniProtKB/Swiss-Prot;Acc:P35750]	gene	overlapping	0	4.84334	4.66247	3.05615
CAN3_PIG	1	143852200	143905749	-	NaN	CAPN3	ENSSSCG00000004728	Calpain-3 [Source:UniProtKB/Swiss-Prot;Acc:P43368]	gene	overlapping	0	-2.99805	-1.33923	-2.26373
CAN7_PIG	13	2379271	2430518	+	NaN	CAPN7	ENSSSCG00000030697	Calpain-7 [Source:UniProtKB/Swiss-Prot;Acc:A0FKG7]	gene	overlapping	0	2.62035	3.31391	3.68411
CAND2	13	76027910	76058202	+	NaN	CAND2	ENSSSCG00000011582	Uncharacterized protein [Source:UniProtKB/TrEMBL;Acc:F1SQ89]	gene	overlapping	0	9.0975	8.89562	9.30254
CAP1	6	89300803	89309905	-	NaN	CAP1	ENSSSCG00000003672	Adenylyl cyclase-associated protein [Source:UniProtKB/TrEMBL;Acc:F1SMC0]	gene	overlapping	0	8.5452	8.08287	7.51696
CAP2	7	14013388	14052973	+	NaN	CAP2	ENSSSCG00000001068	Adenylyl cyclase-associated protein [Source:UniProtKB/TrEMBL;Acc:F1RUJ0]	gene	overlapping	0	-2.99805	-2.30222	-2.64773
CAP7_PIG	2	78284635	78287017	-	NaN	AZU1	ENSSSCG00000013415	Azurocidin [Source:UniProtKB/Swiss-Prot;Acc:P80015]	gene	overlapping	0	-2.99805	-2.30222	-2.64773
CAPG	3	62357528	62367116	-	NaN	CAPG	ENSSSCG00000008239	Uncharacterized protein [Source:UniProtKB/TrEMBL;Acc:F1SVB0]	gene	overlapping	0	5.16669	5.02971	3.75929
CAPN11	7	44993274	45008443	+	NaN	CAPN11	ENSSSCG00000001698	Uncharacterized protein [Source:UniProtKB/TrEMBL;Acc:F1RQU6]	gene	overlapping	0	-2.99805	-2.30222	-2.64773
CAPN12	6	43126597	43139771	-	NaN	CAPN12	ENSSSCG00000002967	Uncharacterized protein [Source:UniProtKB/TrEMBL;Acc:F1RI38]	gene	overlapping	0	-2.99805	-2.30222	-2.64773
CAPN14	3	114886292	114914857	+	NaN	CAPN14	ENSSSCG00000024781	calpain 14 [Source:HGNC Symbol;Acc:16664]	gene	overlapping	0	-2.99805	-2.30222	-2.64773
CAPN3	1	143852200	143889556	-	NaN	CAPN3	ENSSSCG00000004728	Calpain-3 [Source:UniProtKB/Swiss-Prot;Acc:P43368]	gene	overlapping	0	-2.99805	-1.33923	-2.26373
CAPN5	9	12302387	12341085	+	NaN	CAPN5	ENSSSCG00000014875	Uncharacterized protein [Source:UniProtKB/TrEMBL;Acc:F1SUK6]	gene	overlapping	0	3.8897	2.91892	3.26728
CAPN6	X	105673315	105702685	-	NaN	CAPN6	ENSSSCG00000012584	Uncharacterized protein [Source:UniProtKB/TrEMBL;Acc:F1RWU4]	gene	overlapping	0	-2.99805	-2.30222	-2.64773
CAPN9	14	64247757	64288574	-	NaN	CAPN9	ENSSSCG00000010182	Uncharacterized protein [Source:UniProtKB/TrEMBL;Acc:F1RG55]	gene	overlapping	0	-2.94738	-2.30222	-2.64773
CAPRIN1	2	29197638	29242856	-	NaN	CAPRIN1	ENSSSCG00000013305	Uncharacterized protein [Source:UniProtKB/TrEMBL;Acc:F1SGS6]	gene	overlapping	0	6.93881	7.21749	7.52718
CAPRIN2	5	46881786	46924805	-	NaN	CAPRIN2	ENSSSCG00000022611	caprin family member 2 [Source:HGNC Symbol;Acc:21259]	gene	overlapping	0	-0.594418	-2.25156	-0.0491123
CAPS	2	73688680	73690469	+	NaN	CAPS	ENSSSCG00000013532	Uncharacterized protein [Source:UniProtKB/TrEMBL;Acc:F1SBU1]	gene	overlapping	0	-2.94738	-1.91822	-1.73541
CAPS2	5	42098512	42190617	-	NaN	CAPS2	ENSSSCG00000000517	Uncharacterized protein [Source:UniProtKB/TrEMBL;Acc:F1SH16]	gene	overlapping	0	-2.99805	-1.47758	-1.18109
CAPSL	16	22331824	22389296	-	NaN	CAPSL	ENSSSCG00000016833	Uncharacterized protein [Source:UniProtKB/TrEMBL;Acc:F1SNB9]	gene	overlapping	0	-2.99805	-2.30222	-2.64773
CAPZA1	4	117802092	117818131	+	NaN	CAPZA1	ENSSSCG00000006775	capping protein (actin filament) muscle Z-line, alpha 1 [Source:HGNC Symbol;Acc:1488]	gene	overlapping	0	6.10076	6.4565	6.55612
CAPZA3	5	57679486	57680382	-	NaN	CAPZA3	ENSSSCG00000000589	Uncharacterized protein [Source:UniProtKB/TrEMBL;Acc:F1SQZ1]	gene	overlapping	0	-2.99805	-2.30222	-2.64773
CAPZB_PIG	6	71846364	71985441	-	NaN	CAPZB	ENSSSCG00000003493	F-actin-capping protein subunit beta [Source:UniProtKB/Swiss-Prot;Acc:A0PFK7]	gene	overlapping	0	3.97115	4.21218	3.01615
CARD10	5	7898524	7966380	+	NaN	CARD10	ENSSSCG00000025260	caspase recruitment domain family, member 10 [Source:HGNC Symbol;Acc:16422]	gene	overlapping	0	-2.99805	-2.30222	-2.64773
CARD14	12	2199581	2250625	-	NaN	CARD14	ENSSSCG00000017154	Uncharacterized protein [Source:UniProtKB/TrEMBL;Acc:F1RZ85]	gene	overlapping	0	-2.99805	-2.30222	-2.64773
CARHSP1	3	34775137	34780863	+	NaN	CARHSP1	ENSSSCG00000026710	Uncharacterized protein [Source:UniProtKB/TrEMBL;Acc:F1RKY9]	gene	overlapping	0	2.7438	2.63837	2.02965
CARM1	2	70037076	70078479	+	NaN	CARM1	ENSSSCG00000013633	Uncharacterized protein [Source:UniProtKB/TrEMBL;Acc:F1S590]	gene	overlapping	0	2.93146	3.29716	1.84274
CARNS1	2	3814979	3821634	-	NaN	CARNS1	ENSSSCG00000012911	Uncharacterized protein [Source:UniProtKB/TrEMBL;Acc:F1RUY9]	gene	overlapping	0	-2.17341	-1.91822	-2.64773
CARS	2	494866	524106	-	NaN	CARS	ENSSSCG00000012857	cysteinyl-tRNA synthetase [Source:HGNC Symbol;Acc:1493]	gene	overlapping	0	5.40588	4.80463	3.60999
CARS2	11	84749840	84775957	-	NaN	CARS2	ENSSSCG00000029424	Uncharacterized protein [Source:UniProtKB/TrEMBL;Acc:F1RLL6]	gene	overlapping	0	-0.302929	-0.319603	-2.59706
CART_PIG	16	51989808	51991845	+	NaN	CARTPT	ENSSSCG00000016972	Cocaine- and amphetamine-regulated transcript protein CART(55-102) CART(62-102) [Source:UniProtKB/Swiss-Prot;Acc:Q9BDP9]	gene	overlapping	0	-2.99805	-2.30222	-2.64773
CASA1_PIG	8	148201997	148222501	+	NaN	CSN1S1	ENSSSCG00000009262	Alpha-S1-casein [Source:UniProtKB/Swiss-Prot;Acc:P39035]	gene	overlapping	0	-2.99805	-2.30222	-2.64773
CASA2_PIG	8	148310617	148326957	+	NaN	CSN1S2	ENSSSCG00000009263	Alpha-S2-casein [Source:UniProtKB/Swiss-Prot;Acc:P39036]	gene	overlapping	0	-2.99805	-2.30222	-2.64773
CASB_PIG	8	148228429	148236984	-	NaN	CSN2	ENSSSCG00000009261	Beta-casein [Source:UniProtKB/Swiss-Prot;Acc:P39037]	gene	overlapping	0	-2.99805	-2.30222	-2.64773
CASC3	12	22565033	22574313	-	NaN	CASC3	ENSSSCG00000017477	Uncharacterized protein [Source:UniProtKB/TrEMBL;Acc:F1RXC7]	gene	overlapping	0	4.58054	4.76299	5.94287
CASC4	1	141951650	141994485	+	NaN	CASC4	ENSSSCG00000004693	Uncharacterized protein [Source:UniProtKB/TrEMBL;Acc:F1SN03]	gene	overlapping	0	1.29569	0.226207	1.49226
CASC5	1	145844010	145846476	-	NaN	CASC5	ENSSSCG00000004769	Uncharacterized protein [Source:UniProtKB/TrEMBL;Acc:F1SSR8]	gene	overlapping	0	3.39829	4.02921	4.40843
CASD1	9	81459881	81550506	+	NaN	CASD1	ENSSSCG00000015327	Uncharacterized protein [Source:UniProtKB/TrEMBL;Acc:F1SFA6]	gene	overlapping	0	1.07253	1.83463	1.51907
CASK	X	41386587	41763430	-	NaN	CASK	ENSSSCG00000012253	Uncharacterized protein [Source:UniProtKB/TrEMBL;Acc:F1RX15]	gene	overlapping	0	3.99393	4.22651	5.24431
CASK_PIG	8	148440837	148444886	+	NaN	CSN3	ENSSSCG00000009267	Kappa-casein [Source:UniProtKB/Swiss-Prot;Acc:P11841]	gene	overlapping	0	-2.99805	-2.30222	-2.64773
CASP1_PIG	9	39209731	39222235	-	NaN	CASP1	ENSSSCG00000028711	Caspase-1 Caspase-1 subunit p20 Caspase-1 subunit p10 [Source:UniProtKB/Swiss-Prot;Acc:Q9N2I1]	gene	overlapping	0	-2.99805	-2.30222	-2.64773
CASP12	9	39176890	39183684	-	NaN	CASP12	ENSSSCG00000014996	Uncharacterized protein [Source:UniProtKB/TrEMBL;Acc:F1SV37]	gene	overlapping	0	-2.99805	-2.30222	-2.64773
CASP14	2	62082531	62085517	-	NaN	CASP14	ENSSSCG00000013835	Uncharacterized protein [Source:UniProtKB/TrEMBL;Acc:F1SAN1]	gene	overlapping	0	-2.99805	-2.30222	-2.64773
CASP2	18	7187327	7206997	-	NaN	CASP2	ENSSSCG00000016464	Caspase [Source:UniProtKB/TrEMBL;Acc:F1SRV6]	gene	overlapping	0	1.78112	2.10169	2.6097
CASP3	15	52291090	52300426	+	NaN	CASP3	ENSSSCG00000015783	Caspase-3 subunit p12 [Source:UniProtKB/TrEMBL;Acc:F1RSZ5]	gene	overlapping	0	-0.0842467	1.00018	2.01926
CASP4	9	39189334	39207992	-	NaN	CASP4	ENSSSCG00000014997	caspase 4, apoptosis-related cysteine peptidase [Source:HGNC Symbol;Acc:1505]	gene	overlapping	0	-2.99805	-1.53422	-1.82906
CASP6	8	120669698	120678410	+	NaN	CASP6	ENSSSCG00000009140	Uncharacterized protein [Source:UniProtKB/TrEMBL;Acc:F1S131]	gene	overlapping	0	2.23459	2.19034	0.859185
CASP8	15	116275040	116341166	+	NaN	CASP8	ENSSSCG00000028157	Uncharacterized protein [Source:UniProtKB/TrEMBL;Acc:F1SI34]	gene	overlapping	0	-1.89672	-0.426912	-1.08229
CASP9	6	69087122	69111670	-	NaN	CELA2A	ENSSSCG00000003459	Chymotrypsin-like elastase family member 2A [Source:UniProtKB/Swiss-Prot;Acc:P08419]	gene	overlapping	0	-0.311753	-0.734245	-1.40208
CASQ2_PIG	4	115007632	115070760	+	NaN	CASQ2	ENSSSCG00000006745	Calsequestrin-2 [Source:UniProtKB/Swiss-Prot;Acc:O18934]	gene	overlapping	0	3.167	2.10825	-1.54042
CASR	13	147907932	147935070	-	NaN	CASR	ENSSSCG00000011878	Extracellular calcium-sensing receptor [Source:UniProtKB/TrEMBL;Acc:F1SQ21]	gene	overlapping	0	-2.99805	-2.25156	-2.64773
CASS4_PIG	17	64102752	64142123	+	NaN	CASS4	ENSSSCG00000007495	Cas scaffolding protein family member 4 [Source:UniProtKB/Swiss-Prot;Acc:A5GFW5]	gene	overlapping	0	-2.99805	-2.30222	-2.64773
CAST	2	106934106	107128389	+	NaN	CAST	ENSSSCG00000014170	Calpastatin [Source:UniProtKB/Swiss-Prot;Acc:P12675]	gene	overlapping	0	4.22169	3.91527	0.314422
CASZ1	6	64851365	64857266	+	NaN	CASZ1	ENSSSCG00000003407	castor zinc finger 1 [Source:HGNC Symbol;Acc:26002]	gene	overlapping	0	-2.99805	-2.30222	-2.64773
CATA_PIG	2	28860746	28900838	-	NaN	CAT	ENSSSCG00000013302	Catalase [Source:UniProtKB/Swiss-Prot;Acc:O62839]	gene	overlapping	0	5.46172	6.37392	4.68432
CATB_PIG	14	16202844	16223503	-	NaN	CTSB	ENSSSCG00000023666	Cathepsin B Cathepsin B light chain Cathepsin B heavy chain [Source:UniProtKB/Swiss-Prot;Acc:A1E295]	gene	overlapping	0	5.72961	5.52399	2.63032
CATH_PIG	7	53623062	53644262	-	NaN	CTSH	ENSSSCG00000001770	Pro-cathepsin H Cathepsin H mini chain Cathepsin H Cathepsin H heavy chain Cathepsin H light chain [Source:UniProtKB/Swiss-Prot;Acc:O46427]	gene	overlapping	0	3.48155	2.95251	2.54548
CATK_PIG	4	107641167	107653106	+	NaN	CTSK	ENSSSCG00000006647	Cathepsin K [Source:UniProtKB/Swiss-Prot;Acc:Q9GLE3]	gene	overlapping	0	5.40398	3.65282	0.947873
CATL1_PIG	10	76997766	77003512	+	NaN	CTSL1	ENSSSCG00000011171	Cathepsin L1 Cathepsin L1 heavy chain Cathepsin L1 light chain [Source:UniProtKB/Swiss-Prot;Acc:Q28944]	gene	overlapping	0	4.79299	4.57335	3.71118
CATSPER1	2	5420795	5425387	+	NaN	CATSPER1	ENSSSCG00000029016	Cation channel of sperm 1 [Source:UniProtKB/TrEMBL;Acc:B2G3D8]	gene	overlapping	0	-2.56338	-2.25156	-2.26373
CATSPERB	7	119754090	119790153	-	NaN	CATSPERB	ENSSSCG00000002442	Uncharacterized protein [Source:UniProtKB/TrEMBL;Acc:F1SD89]	gene	overlapping	0	-2.99805	-2.30222	-2.64773
CATSPERG	6	42753692	42782998	+	NaN	CATSPERG	ENSSSCG00000002955	Uncharacterized protein [Source:UniProtKB/TrEMBL;Acc:F1RKJ0]	gene	overlapping	0	0.328473	1.16687	-2.64773
CAV1_PIG	18	31745664	31780340	-	NaN	CAV1	ENSSSCG00000016634	Caveolin-1 [Source:UniProtKB/Swiss-Prot;Acc:Q6RVA9]	gene	overlapping	0	-2.99805	-2.30222	-2.64773
CAV2_PIG	18	31796924	31805190	-	NaN	CAV2	ENSSSCG00000016635	Caveolin-2 [Source:UniProtKB/Swiss-Prot;Acc:Q2QLE2]	gene	overlapping	0	-1.12274	0.30522	-1.49573
CAZA2_PIG	18	31261838	31286326	-	NaN	CAPZA2	ENSSSCG00000028113	F-actin-capping protein subunit alpha-2 [Source:UniProtKB/Swiss-Prot;Acc:Q29221]	gene	overlapping	0	3.8841	3.88233	4.29379
CBFA2T2	17	41984968	42071429	-	NaN	CBFA2T2	ENSSSCG00000027410	Uncharacterized protein [Source:UniProtKB/TrEMBL;Acc:F1S4Z8]	gene	overlapping	0	3.49286	3.11595	2.20972
CBFA2T3	6	1022607	1044687	+	NaN	CBFA2T3	ENSSSCG00000002648	Uncharacterized protein [Source:UniProtKB/TrEMBL;Acc:F1S6L8]	gene	overlapping	0	-2.99805	-2.30222	-2.64773
CBG_PIG	7	122544966	122563955	-	NaN	SERPINA6	ENSSSCG00000002475	Corticosteroid-binding globulin [Source:UniProtKB/Swiss-Prot;Acc:Q9GK37]	gene	overlapping	0	-2.99805	-2.30222	-2.64773
CBL	9	51452067	51540892	+	NaN	CBL	ENSSSCG00000015115	Uncharacterized protein [Source:UniProtKB/TrEMBL;Acc:F1SAH0]	gene	overlapping	0	4.86262	5.27198	4.5926
CBLB	13	162677245	162892743	+	NaN	CBLB	ENSSSCG00000022486	Cbl proto-oncogene, E3 ubiquitin protein ligase B [Source:HGNC Symbol;Acc:1542]	gene	overlapping	0	2.66822	2.43502	1.63558
CBLC	6	47176024	47191785	+	NaN	CBLC	ENSSSCG00000003083	Uncharacterized protein [Source:UniProtKB/TrEMBL;Acc:F1RMS6]	gene	overlapping	0	-1.38194	0.239755	-0.961434
CBLN2	1	167190973	167199122	+	NaN	CBLN2	ENSSSCG00000020859	Cerebellin 2; Uncharacterized protein [Source:UniProtKB/TrEMBL;Acc:F1SNL1]	gene	overlapping	0	-2.99805	-2.30222	-2.64773
CBPA1_PIG	18	19472689	19479095	-	NaN	CPA1	ENSSSCG00000016557	Carboxypeptidase A1 [Source:UniProtKB/Swiss-Prot;Acc:P09954]	gene	overlapping	0	-2.41906	-2.30222	-2.64773
CBPB1_PIG	13	97068895	97084249	+	NaN	CPB1	ENSSSCG00000011694	Carboxypeptidase B [Source:UniProtKB/Swiss-Prot;Acc:P09955]	gene	overlapping	0	-2.99805	-2.30222	-2.64773
CBPG	3	39243122	39254214	-	NaN	CBPG	ENSSSCG00000007949	Sarcolumenin [Source:UniProtKB/TrEMBL;Acc:Q9XSE7]	gene	overlapping	0	-2.99805	-2.30222	-2.64773
CBR3	13	209842576	209852620	+	NaN	CBR3	ENSSSCG00000012053	Uncharacterized protein [Source:UniProtKB/TrEMBL;Acc:F1SGX4]	gene	overlapping	0	-2.99805	-2.30222	-2.64773
CBR4	14	21908680	21929202	+	NaN	CBR4	ENSSSCG00000009717	Uncharacterized protein [Source:UniProtKB/TrEMBL;Acc:F1RIX8]	gene	overlapping	0	4.2965	4.76792	3.6803
CBX1	12	24228635	24250057	+	NaN	CBX1	ENSSSCG00000017529	Uncharacterized protein [Source:UniProtKB/TrEMBL;Acc:F1RWH1]	gene	overlapping	0	5.42767	5.17582	7.13907
CBX2	12	2640102	2648346	-	NaN	CBX2	ENSSSCG00000024261	chromobox homolog 2 [Source:HGNC Symbol;Acc:1552]	gene	overlapping	0	-2.41906	-1.67257	0.542532
CBX3	18	50968278	50979509	-	NaN	CBX3	ENSSSCG00000016711	Uncharacterized protein [Source:UniProtKB/TrEMBL;Acc:F1ST98]	gene	overlapping	0	3.94601	4.78994	5.35411
CBX4	12	2591047	2597546	+	NaN	CBX4	ENSSSCG00000017160	Uncharacterized protein [Source:UniProtKB/TrEMBL;Acc:F1RZ78]	gene	overlapping	0	-0.96093	-1.53422	0.0980575
CBX5	5	19983104	19993994	+	NaN	CBX5	ENSSSCG00000000282	Uncharacterized protein [Source:UniProtKB/TrEMBL;Acc:F2Z5T3]	gene	overlapping	0	2.72178	2.24101	3.204
CBX7	5	6355329	6369434	+	NaN	CBX7	ENSSSCG00000000090	Uncharacterized protein [Source:UniProtKB/TrEMBL;Acc:F1SNY1]	gene	overlapping	0	-2.99805	-2.30222	-2.64773
CBY3	2	80500235	80502316	+	NaN	CBY3	ENSSSCG00000014021	Uncharacterized protein [Source:UniProtKB/TrEMBL;Acc:F1S440]	gene	overlapping	0	-2.99805	-2.30222	-2.64773
CC2D1B	6	147514437	147525998	+	NaN	CC2D1B	ENSSSCG00000003862	Uncharacterized protein [Source:UniProtKB/TrEMBL;Acc:F1S6H6]	gene	overlapping	0	2.24405	1.70719	1.83217
CC2D2A	8	10399765	10545919	+	NaN	CC2D2A	ENSSSCG00000008738	Uncharacterized protein [Source:UniProtKB/TrEMBL;Acc:F1S5E5]	gene	overlapping	0	-1.7524	-1.53422	-2.59706
CCAR1	14	77889105	77906854	+	NaN	CCAR1	ENSSSCG00000010243	cell division cycle and apoptosis regulator 1 [Source:HGNC Symbol;Acc:24236]	gene	overlapping	0	3.93292	4.53283	6.09306
CCBE1	1	178905034	179129728	+	NaN	CCBE1	ENSSSCG00000004907	Uncharacterized protein [Source:UniProtKB/TrEMBL;Acc:F1SMU0]	gene	overlapping	0	-2.99805	-2.30222	-2.64773
CCBL1	1	303188689	303225560	-	NaN	CCBL1	ENSSSCG00000005663	Uncharacterized protein [Source:UniProtKB/TrEMBL;Acc:F1RR62]	gene	overlapping	0	4.5645	4.58542	4.18374
CCBL2	4	139698110	139732899	+	NaN	CCBL2	ENSSSCG00000006925	Uncharacterized protein [Source:UniProtKB/TrEMBL;Acc:F1S4D5]	gene	overlapping	0	4.57018	4.83285	3.99751
CCBP2	13	28991391	28992548	+	NaN	CCBP2	ENSSSCG00000011289	Uncharacterized protein [Source:UniProtKB/TrEMBL;Acc:F1SRE8]	gene	overlapping	0	-2.99805	-2.30222	-2.64773
CCDC102A	6	17426723	17447550	-	NaN	CCDC102A	ENSSSCG00000028723	coiled-coil domain containing 102A [Source:HGNC Symbol;Acc:28097]	gene	overlapping	0	-2.99805	-2.20089	-1.15642
CCDC103	12	18714010	18718977	-	NaN	CCDC103	ENSSSCG00000017345	Uncharacterized protein [Source:UniProtKB/TrEMBL;Acc:F1RR00]	gene	overlapping	0	-2.89672	-2.30222	-2.21306
CCDC104	3	90513400	90543451	+	NaN	CCDC104	ENSSSCG00000008400	Uncharacterized protein [Source:UniProtKB/TrEMBL;Acc:F1SQK9]	gene	overlapping	0	-0.520287	1.6804	0.683991
CCDC105	2	62130057	62141142	-	NaN	CCDC105	ENSSSCG00000013834	Uncharacterized protein [Source:UniProtKB/TrEMBL;Acc:F1SAN2]	gene	overlapping	0	-2.99805	-2.30222	-2.64773
CCDC107	1	264105680	264108701	+	NaN	CCDC107	ENSSSCG00000005313	Uncharacterized protein [Source:UniProtKB/TrEMBL;Acc:F1SG03]	gene	overlapping	0	2.55736	0.124872	1.88284
CCDC108	15	134087004	134103779	-	NaN	CCDC108	ENSSSCG00000016203	Uncharacterized protein [Source:UniProtKB/TrEMBL;Acc:F1SRW7]	gene	overlapping	0	-1.11677	-2.30222	-2.64773
CCDC109B	8	120682813	120700145	-	NaN	CCDC109B	ENSSSCG00000009141	Uncharacterized protein [Source:UniProtKB/TrEMBL;Acc:F1S130]	gene	overlapping	0	-2.99805	-0.47758	-2.06874
CCDC11	1	109565105	109589137	-	NaN	CCDC11	ENSSSCG00000027690	Uncharacterized protein [Source:UniProtKB/TrEMBL;Acc:F1RPP5]	gene	overlapping	0	5.20276	4.55141	5.76344
CCDC110	15	53276349	53285202	-	NaN	CCDC110	ENSSSCG00000015795	Uncharacterized protein [Source:UniProtKB/TrEMBL;Acc:F1RZQ1]	gene	overlapping	0	-2.99805	-2.30222	-2.64773
CCDC112	2	124337483	124368895	-	NaN	CCDC112	ENSSSCG00000029866	coiled-coil domain containing 112 [Source:HGNC Symbol;Acc:28599]	gene	overlapping	0	1.17956	-0.547769	-2.59706
CCDC113	6	18111782	18145011	+	NaN	CCDC113	ENSSSCG00000002803	Uncharacterized protein [Source:UniProtKB/TrEMBL;Acc:F1RFS9]	gene	overlapping	0	-2.99805	-2.30222	-2.64773
CCDC114	6	49364538	49390203	-	NaN	CCDC114	ENSSSCG00000026689	coiled-coil domain containing 114 [Source:HGNC Symbol;Acc:26560]	gene	overlapping	0	-1.36839	-1.33923	-1.21306
CCDC115	15	35896926	35899979	+	NaN	CCDC115	ENSSSCG00000015737	Uncharacterized protein [Source:UniProtKB/TrEMBL;Acc:F1RXX0]	gene	overlapping	0	0.748831	-0.265103	-0.715779
CCDC116	14	53707039	53709456	-	NaN	CCDC116	ENSSSCG00000010086	Uncharacterized protein [Source:UniProtKB/TrEMBL;Acc:F1RKZ5]	gene	overlapping	0	-2.99805	-2.30222	-2.64773
CCDC12	13	33067121	33120110	-	NaN	CCDC12	ENSSSCG00000011329	coiled-coil domain containing 12 [Source:HGNC Symbol;Acc:28332]	gene	overlapping	0	2.04121	3.64623	2.46921
CCDC120	X	47985912	47994738	+	NaN	CCDC120	ENSSSCG00000012288	Uncharacterized protein [Source:UniProtKB/TrEMBL;Acc:F1RW56]	gene	overlapping	0	-1.94738	-1.86755	-1.82906
CCDC121	3	118532914	118533747	+	NaN	CCDC121	ENSSSCG00000008547	Uncharacterized protein [Source:UniProtKB/TrEMBL;Acc:F1SEE0]	gene	overlapping	0	-2.23005	-2.30222	-2.64773
CCDC122	11	23611635	23650607	+	NaN	LACC1	ENSSSCG00000009425	Uncharacterized protein [Source:UniProtKB/TrEMBL;Acc:F1RJX9]	gene	overlapping	0	-1.21042	-1.48355	-0.503302
CCDC124	2	59390286	59400215	-	NaN	CCDC124	ENSSSCG00000013891	Uncharacterized protein [Source:UniProtKB/TrEMBL;Acc:F1S924]	gene	overlapping	0	3.36657	3.00378	3.35668
CCDC126	9	101903918	101924111	-	NaN	CCDC126	ENSSSCG00000029174	coiled-coil domain containing 126 [Source:HGNC Symbol;Acc:22398]	gene	overlapping	0	0.16966	-0.898591	-0.503302
CCDC129	18	45684370	45764339	+	NaN	CCDC129	ENSSSCG00000016671	Uncharacterized protein [Source:UniProtKB/TrEMBL;Acc:F1SIK0]	gene	overlapping	0	0.392034	1.2964	0.136886
CCDC13	13	28893092	28927988	-	NaN	CCDC13	ENSSSCG00000011291	Uncharacterized protein [Source:UniProtKB/TrEMBL;Acc:F1SRE6]	gene	overlapping	0	-2.08573	-2.30222	-2.64773
CCDC130	2	65682852	65699416	-	NaN	CCDC130	ENSSSCG00000013755	Uncharacterized protein [Source:UniProtKB/TrEMBL;Acc:F1SD79]	gene	overlapping	0	1.84622	-0.468756	-0.331778
CCDC132	9	80084577	80091776	+	NaN	CCDC132	ENSSSCG00000022982	Uncharacterized protein [Source:UniProtKB/TrEMBL;Acc:F1SFC2]	gene	overlapping	0	2.64073	4.10047	2.34871
CCDC135	6	17574599	17580003	-	NaN	CCDC135	ENSSSCG00000002817	Uncharacterized protein [Source:UniProtKB/TrEMBL;Acc:F1RF34]	gene	overlapping	0	-2.99805	-2.30222	-2.64773
CCDC136	18	20818950	20848924	+	NaN	CCDC136	ENSSSCG00000016579	Uncharacterized protein [Source:UniProtKB/TrEMBL;Acc:F1SMN4]	gene	overlapping	0	-2.99805	-2.30222	-1.61061
CCDC138	3	49632058	49685648	+	NaN	CCDC138	ENSSSCG00000008135	coiled-coil domain containing 138 [Source:HGNC Symbol;Acc:26531]	gene	overlapping	0	-0.663235	-0.867555	-1.43909
CCDC14	13	145971197	145999023	+	NaN	CCDC14	ENSSSCG00000025349	Coiled-coil domain containing protein 14 [Source:UniProtKB/TrEMBL;Acc:Q009B9]	gene	overlapping	0	1.53635	1.91388	0.830031
CCDC141	15	94039083	94178617	-	NaN	CCDC141	ENSSSCG00000016002	Uncharacterized protein [Source:UniProtKB/TrEMBL;Acc:F1RZC6]	gene	overlapping	0	-2.99805	-1.72324	-2.64773
CCDC146	9	113119527	113148343	+	NaN	CCDC146	ENSSSCG00000015412	Uncharacterized protein [Source:UniProtKB/TrEMBL;Acc:F1SB85]	gene	overlapping	0	-2.99805	-2.30222	-2.59706
CCDC147	14	125263736	125380998	+	NaN	CCDC147	ENSSSCG00000010614	coiled-coil domain containing 147 [Source:HGNC Symbol;Acc:26676]	gene	overlapping	0	-1.50674	-2.30222	-2.64773
CCDC148	15	72440666	72467250	+	NaN	CCDC148	ENSSSCG00000015876	Uncharacterized protein [Source:UniProtKB/TrEMBL;Acc:F1RPT6]	gene	overlapping	0	-2.99805	-2.30222	-2.64773
CCDC149	8	19207126	19303275	+	NaN	CCDC149	ENSSSCG00000023001	coiled-coil domain containing 149 [Source:HGNC Symbol;Acc:25405]	gene	overlapping	0	-2.0116	-0.867555	-2.59706
CCDC15	9	57661819	57731502	+	NaN	CCDC15	ENSSSCG00000015206	Uncharacterized protein [Source:UniProtKB/TrEMBL;Acc:F1S793]	gene	overlapping	0	2.22846	2.01498	0.48706
CCDC150	15	111555522	111634452	-	NaN	CCDC150	ENSSSCG00000016069	Uncharacterized protein [Source:UniProtKB/TrEMBL;Acc:F1SN15]	gene	overlapping	0	-1.89074	1.00971	-2.64773
CCDC151	2	70354002	70355334	+	NaN	CCDC151	ENSSSCG00000013626	Uncharacterized protein [Source:UniProtKB/TrEMBL;Acc:F1S597]	gene	overlapping	0	-1.67826	-2.30222	-2.64773
CCDC152	16	28995337	29021818	+	NaN	CCDC152	ENSSSCG00000016867	Uncharacterized protein [Source:UniProtKB/TrEMBL;Acc:F1SMH3]	gene	overlapping	0	-2.99805	-2.30222	-2.64773
CCDC153	9	51442180	51446562	-	NaN	CCDC153	ENSSSCG00000015109	Uncharacterized protein [Source:UniProtKB/TrEMBL;Acc:F1SAH6]	gene	overlapping	0	-2.99805	-1.72323	-2.64773
CCDC155	6	50212384	50229864	+	NaN	CCDC155	ENSSSCG00000003172	Uncharacterized protein [Source:UniProtKB/TrEMBL;Acc:F1RHZ5]	gene	overlapping	0	-2.99805	-2.30222	-2.64773
CCDC157	14	50419600	50434147	+	NaN	SF3A1	ENSSSCG00000010002	Uncharacterized protein [Source:UniProtKB/TrEMBL;Acc:F1RFD3]	gene	overlapping	0	1.76846	-0.483554	-1.05992
CCDC158	8	76185238	76288275	-	NaN	CCDC158	ENSSSCG00000008983	Uncharacterized protein [Source:UniProtKB/TrEMBL;Acc:F1RYS8]	gene	overlapping	0	-2.99805	-2.30222	-2.59706
CCDC159	2	70403193	70410019	+	NaN	CCDC159	ENSSSCG00000013621	Uncharacterized protein [Source:UniProtKB/TrEMBL;Acc:F1SA13]	gene	overlapping	0	-0.700227	-0.352781	-2.06874
CCDC164	3	119717928	119743831	-	NaN	HADHA	ENSSSCG00000008571	Trifunctional enzyme subunit alpha, mitochondrial Long-chain enoyl-CoA hydratase Long chain 3-hydroxyacyl-CoA dehydrogenase [Source:UniProtKB/Swiss-Prot;Acc:Q29554]	gene	overlapping	0	-2.99805	-2.30222	-2.64773
CCDC166	4	990926	991553	-	NaN	CCDC166	ENSSSCG00000006951	Uncharacterized protein [Source:UniProtKB/TrEMBL;Acc:F1SEW1]	gene	overlapping	0	-2.99805	-2.30222	-2.64773
CCDC168	11	78361372	78368847	-	NaN	CCDC168	ENSSSCG00000009530	Uncharacterized protein [Source:UniProtKB/TrEMBL;Acc:F1RLQ7]	gene	overlapping	0	-1.94738	-1.33923	-0.994613
CCDC18	4	135595935	135692379	-	NaN	CCDC18	ENSSSCG00000006897	Uncharacterized protein [Source:UniProtKB/TrEMBL;Acc:F1S532]	gene	overlapping	0	2.583	-0.426912	2.27537
CCDC19	4	98569802	98589936	-	NaN	CCDC19	ENSSSCG00000006394	Uncharacterized protein [Source:UniProtKB/TrEMBL;Acc:F1RJW3]	gene	overlapping	0	-2.17938	-1.04774	1.94726
CCDC22	X	48133166	48152395	+	NaN	CCDC22	ENSSSCG00000012297	Uncharacterized protein [Source:UniProtKB/TrEMBL;Acc:F1RW40]	gene	overlapping	0	1.89689	1.50887	1.89236
CCDC23	4	117723361	117723558	+	NaN	CCDC23	ENSSSCG00000006772	Uncharacterized protein [Source:UniProtKB/TrEMBL;Acc:F1SBQ2]	gene	overlapping	0	-2.99805	-2.30222	-2.64773
CCDC28A	1	28782260	28798850	-	NaN	CCDC28A	ENSSSCG00000004148	Uncharacterized protein [Source:UniProtKB/TrEMBL;Acc:F1S6Y0]	gene	overlapping	0	1.59431	2.76383	1.73775
CCDC3	10	64772795	64777500	+	NaN	CCDC3	ENSSSCG00000011110	Uncharacterized protein [Source:UniProtKB/TrEMBL;Acc:F1RUQ7]	gene	overlapping	0	-2.99805	-2.30222	-2.64773
CCDC30	6	156246761	156329909	-	NaN	CCDC30	ENSSSCG00000003965	Uncharacterized protein [Source:UniProtKB/TrEMBL;Acc:F1SF94]	gene	overlapping	0	-2.99805	-1.91822	-2.64773
CCDC34	2	35619281	35656363	+	NaN	CCDC34	ENSSSCG00000013336	coiled-coil domain containing 34 [Source:HGNC Symbol;Acc:25079]	gene	overlapping	0	3.86284	3.85794	4.36101
CCDC37	7	58791315	58820798	+	NaN	CCDC37	ENSSSCG00000001826	Uncharacterized protein [Source:UniProtKB/TrEMBL;Acc:F1RMH1]	gene	overlapping	0	-2.99805	-2.30222	-2.26373
CCDC38	5	91781024	91817365	+	NaN	CCDC38	ENSSSCG00000000894	Uncharacterized protein [Source:UniProtKB/TrEMBL;Acc:F1SQR5]	gene	overlapping	0	-2.99805	-2.30222	-2.59706
CCDC39	13	127829131	127884813	-	NaN	CCDC39	ENSSSCG00000011768	Uncharacterized protein [Source:UniProtKB/TrEMBL;Acc:F1SGC2]	gene	overlapping	0	0.230225	0.290422	1.79439
CCDC40	12	2412539	2453514	-	NaN	CCDC40	ENSSSCG00000017158	Uncharacterized protein [Source:UniProtKB/TrEMBL;Acc:F1RZ80]	gene	overlapping	0	-2.99805	-2.30222	-2.64773
CCDC41	5	93459752	93529504	-	NaN	PLXNC1	ENSSSCG00000000907	plexin C1 [Source:HGNC Symbol;Acc:9106]	gene	overlapping	0	3.85279	3.62425	4.07299
CCDC42B	14	41102231	41110897	+	NaN	CCDC42B	ENSSSCG00000009875	Uncharacterized protein [Source:UniProtKB/TrEMBL;Acc:F1RKB4]	gene	overlapping	0	0.0304048	-0.652936	0.95237
CCDC47	12	15155060	15174686	+	NaN	CCDC47	ENSSSCG00000028698	coiled-coil domain containing 47 [Source:HGNC Symbol;Acc:24856]	gene	overlapping	0	5.55699	5.5005	5.54755
CCDC48	13	79102780	79128224	+	NaN	CCDC48	ENSSSCG00000024000	coiled-coil domain containing 48 [Source:HGNC Symbol;Acc:25692]	gene	overlapping	0	-2.99805	-2.30222	-2.64773
CCDC50	13	138043701	138080419	+	NaN	CCDC50	ENSSSCG00000011817	Uncharacterized protein [Source:UniProtKB/TrEMBL;Acc:F1SFH2]	gene	overlapping	0	2.63543	1.87538	0.106723
CCDC51	13	34407779	34418022	-	NaN	CCDC51	ENSSSCG00000011350	Uncharacterized protein [Source:UniProtKB/TrEMBL;Acc:F1SKM5]	gene	overlapping	0	2.7227	2.64601	4.22056
CCDC56	12	20277755	20278918	+	NaN	WNK4	ENSSSCG00000017387	Uncharacterized protein [Source:UniProtKB/TrEMBL;Acc:F1S1F4]	gene	overlapping	0	3.85914	4.25897	4.61292
CCDC57	12	902572	932126	-	NaN	CCDC57	ENSSSCG00000029553	coiled-coil domain containing 57 [Source:HGNC Symbol;Acc:27564]	gene	overlapping	0	-2.99805	-0.810913	-2.64773
CCDC58	13	147763386	147782335	+	NaN	CCDC58	ENSSSCG00000025107	coiled-coil domain containing 58 [Source:HGNC Symbol;Acc:31136]	gene	overlapping	0	3.66276	4.21242	5.43855
CCDC6	14	68153446	68274345	-	NaN	CCDC6	ENSSSCG00000010211	Uncharacterized protein [Source:UniProtKB/TrEMBL;Acc:F1RG04]	gene	overlapping	0	2.82669	1.6804	2.94298
CCDC60	14	35273898	35334257	-	NaN	CCDC60	ENSSSCG00000009842	Uncharacterized protein [Source:UniProtKB/TrEMBL;Acc:F1RKH7]	gene	overlapping	0	-2.94738	-2.30222	-2.64773
CCDC61	6	47556754	47579331	+	NaN	CCDC61	ENSSSCG00000003100	Uncharacterized protein [Source:UniProtKB/TrEMBL;Acc:F1RM23]	gene	overlapping	0	-2.12274	-1.53422	-1.26373
CCDC62	14	31718478	31756350	-	NaN	CCDC62	ENSSSCG00000009787	Uncharacterized protein [Source:UniProtKB/TrEMBL;Acc:F1REX7]	gene	overlapping	0	2.7475	2.11241	1.68205
CCDC63	14	34084762	34175263	+	NaN	CCDC63	ENSSSCG00000009829	coiled-coil domain containing 63 [Source:HGNC Symbol;Acc:26669]	gene	overlapping	0	-2.03506	-2.25156	-2.59706
CCDC64	14	42566601	42686064	+	NaN	CCDC64	ENSSSCG00000009896	Uncharacterized protein [Source:UniProtKB/TrEMBL;Acc:F1RJK6]	gene	overlapping	0	-1.59442	-2.25156	-2.26373
CCDC64B	3	40538890	40545834	-	NaN	CCDC64B	ENSSSCG00000020895	coiled-coil domain containing 64B [Source:HGNC Symbol;Acc:33584]	gene	overlapping	0	-2.99805	-1.58489	-1.20709
CCDC65	5	15361359	15368748	+	NaN	CCDC65	ENSSSCG00000000179	Uncharacterized protein [Source:UniProtKB/TrEMBL;Acc:F1SPN2]	gene	overlapping	0	-2.17341	-2.30222	-2.64773
CCDC66	13	42284163	42341496	+	NaN	CCDC66	ENSSSCG00000021439	coiled-coil domain containing 66 [Source:HGNC Symbol;Acc:27709]	gene	overlapping	0	4.42131	4.32533	4.71123
CCDC67	9	29427413	29494385	+	NaN	CCDC67	ENSSSCG00000014943	Uncharacterized protein [Source:UniProtKB/TrEMBL;Acc:F1STM2]	gene	overlapping	0	-1.23005	-0.784912	1.49238
CCDC67	9	29570691	29572575	-	NaN	CCDC67	ENSSSCG00000014942	Uncharacterized protein [Source:UniProtKB/TrEMBL;Acc:F1STM3]	gene	overlapping	0	-2.99805	-1.53422	-1.82309
CCDC68	1	114766540	114802008	-	NaN	CCDC68	ENSSSCG00000004534	Uncharacterized protein [Source:UniProtKB/TrEMBL;Acc:F1S1Z2]	gene	overlapping	0	3.16928	4.08826	3.51098
CCDC69	16	78027656	78054985	+	NaN	CCDC69	ENSSSCG00000028058	coiled-coil domain containing 69 [Source:HGNC Symbol;Acc:24487]	gene	overlapping	0	-2.61405	-1.72323	-2.59706
CCDC70	11	16342876	16343568	+	NaN	CCDC70	ENSSSCG00000009383	Uncharacterized protein [Source:UniProtKB/TrEMBL;Acc:F1RK32]	gene	overlapping	0	-2.89672	-2.30222	-2.64773
CCDC71	13	34998036	35001762	-	NaN	CCDC71	ENSSSCG00000011378	Uncharacterized protein [Source:UniProtKB/TrEMBL;Acc:F1SPT4]	gene	overlapping	0	2.45613	1.27902	-1.9304
CCDC72	13	34418062	34420816	+	NaN	CCDC72	ENSSSCG00000011351	Uncharacterized protein [Source:UniProtKB/TrEMBL;Acc:F2Z5V1]	gene	overlapping	0	5.95627	6.29279	6.68225
CCDC73	2	30654753	30748810	+	NaN	CCDC73	ENSSSCG00000026433	coiled-coil domain containing 73 [Source:HGNC Symbol;Acc:23261]	gene	overlapping	0	3.96386	4.37209	4.5629
CCDC75	3	109677473	109691729	-	NaN	CCDC75	ENSSSCG00000008497	Uncharacterized protein [Source:UniProtKB/TrEMBL;Acc:F1S4P2]	gene	overlapping	0	3.22751	4.15573	4.18504
CCDC76	4	129588831	129601114	+	NaN	CCDC76	ENSSSCG00000006869	Uncharacterized protein [Source:UniProtKB/TrEMBL;Acc:F1S560]	gene	overlapping	0	1.21059	0.378101	1.18937
CCDC77	5	69928792	69967179	+	NaN	CCDC77	ENSSSCG00000000751	Uncharacterized protein [Source:UniProtKB/TrEMBL;Acc:F1SK78]	gene	overlapping	0	0.707879	3.0792	3.135
CCDC8	6	47679736	47796430	+	NaN	CCDC8	ENSSSCG00000026220	coiled-coil domain containing 8 [Source:HGNC Symbol;Acc:25367]	gene	overlapping	0	-1.61405	-2.30222	-2.59706
CCDC80	13	156787577	156826093	+	NaN	CCDC80	ENSSSCG00000011928	Uncharacterized protein [Source:UniProtKB/TrEMBL;Acc:F1SLT8]	gene	overlapping	0	-1.89672	-2.25156	-2.64773
CCDC81	9	22528339	22572779	+	NaN	CCDC81	ENSSSCG00000014917	Uncharacterized protein [Source:UniProtKB/TrEMBL;Acc:F1STS5]	gene	overlapping	0	0.774315	0.452231	2.99551
CCDC82	9	32410090	32435117	-	NaN	CCDC82	ENSSSCG00000014972	Uncharacterized protein [Source:UniProtKB/TrEMBL;Acc:F1STI2]	gene	overlapping	0	1.62972	-1.33923	1.26113
CCDC83	9	22060860	22087186	+	NaN	CCDC83	ENSSSCG00000014912	Uncharacterized protein [Source:UniProtKB/TrEMBL;Acc:F1STT0]	gene	overlapping	0	-1.31175	0.1616	-2.26373
CCDC85A	3	89688777	89884336	-	NaN	CCDC85A	ENSSSCG00000008396	Uncharacterized protein [Source:UniProtKB/TrEMBL;Acc:F1SQL3]	gene	overlapping	0	-1.94738	-1.91822	-1.66128
CCDC85B	2	5541055	5541663	-	NaN	FOSL1	ENSSSCG00000012967	Uncharacterized protein [Source:UniProtKB/TrEMBL;Acc:F1RU26]	gene	overlapping	0	-2.99805	-2.30222	-2.64773
CCDC86	2	10479528	10492013	+	NaN	CCDC86	ENSSSCG00000013105	Uncharacterized protein [Source:UniProtKB/TrEMBL;Acc:F1RIC1]	gene	overlapping	0	0.69889	-0.867555	1.86621
CCDC87	2	4864531	4867104	-	NaN	CCDC87	ENSSSCG00000012933	Uncharacterized protein [Source:UniProtKB/TrEMBL;Acc:F1RUT6]	gene	overlapping	0	-2.99805	-2.30222	-2.64773
CCDC88A	3	90623418	90726404	+	NaN	CCDC88A	ENSSSCG00000008406	Uncharacterized protein [Source:UniProtKB/TrEMBL;Acc:F1SQK4]	gene	overlapping	0	0.878512	2.96455	2.45897
CCDC88B	2	6992733	7010294	+	NaN	STIP1	ENSSSCG00000021620	stress-induced-phosphoprotein 1 [Source:HGNC Symbol;Acc:11387]	gene	overlapping	0	-2.99805	-2.30222	-2.64773
CCDC88C	7	119490916	119618608	-	NaN	CCDC88C	ENSSSCG00000002440	Uncharacterized protein [Source:UniProtKB/TrEMBL;Acc:F1SD91]	gene	overlapping	0	-1.84007	-2.30222	-2.06874
CCDC89	9	21877984	21879105	-	NaN	CCDC89	ENSSSCG00000014908	Uncharacterized protein [Source:UniProtKB/TrEMBL;Acc:F1STT3]	gene	overlapping	0	-2.94738	-2.30222	-2.64773
CCDC9	6	48439235	48450630	+	NaN	CCDC9	ENSSSCG00000024240	coiled-coil domain containing 9 [Source:HGNC Symbol;Acc:24560]	gene	overlapping	0	0.0156067	-0.111959	-0.0119919
CCDC90A	7	10548738	10575969	-	NaN	CCDC90A	ENSSSCG00000001057	Uncharacterized protein [Source:UniProtKB/TrEMBL;Acc:F1RV76]	gene	overlapping	0	3.40055	3.76703	3.97284
CCDC90B	9	19327662	19360915	-	NaN	CCDC90B	ENSSSCG00000014903	Uncharacterized protein [Source:UniProtKB/TrEMBL;Acc:F1STU7]	gene	overlapping	0	4.33162	4.95349	4.58522
CCDC91	5	48589732	48684265	-	NaN	CCDC91	ENSSSCG00000000543	Uncharacterized protein [Source:UniProtKB/TrEMBL;Acc:F1SG98]	gene	overlapping	0	1.82401	1.50504	0.678138
CCDC92	14	30775616	30792247	+	NaN	CCDC92	ENSSSCG00000009764	Uncharacterized protein [Source:UniProtKB/TrEMBL;Acc:F1RFN0]	gene	overlapping	0	-2.99805	-2.30222	-2.64773
CCDC93	15	26872992	26974155	-	NaN	CCDC93	ENSSSCG00000015714	Uncharacterized protein [Source:UniProtKB/TrEMBL;Acc:F1RY11]	gene	overlapping	0	4.06187	3.902	4.35109
CCDC94	2	75006589	75022972	-	NaN	CCDC94	ENSSSCG00000013499	Uncharacterized protein [Source:UniProtKB/TrEMBL;Acc:F1S7N8]	gene	overlapping	0	-0.927752	0.99535	1.83003
CCDC96	8	3378784	3380451	-	NaN	CCDC96	ENSSSCG00000028085	coiled-coil domain containing 96 [Source:HGNC Symbol;Acc:26900]	gene	overlapping	0	-2.99805	-2.30222	-2.64773
CCDC97	6	45113704	45123373	+	NaN	CCDC97	ENSSSCG00000003016	Uncharacterized protein [Source:UniProtKB/TrEMBL;Acc:F1RH83]	gene	overlapping	0	-2.99805	-2.30222	-2.64773
CCDC97	6	45251705	45261402	-	NaN	B9D2	ENSSSCG00000003013	Uncharacterized protein [Source:UniProtKB/TrEMBL;Acc:F1RH86]	gene	overlapping	0	-2.99805	-2.30222	-2.64773
CCDC99	16	58704578	58723573	+	NaN	CCDC99	ENSSSCG00000017011	Uncharacterized protein [Source:UniProtKB/TrEMBL;Acc:F1RR93]	gene	overlapping	0	-2.94738	-2.30222	-2.64773
CCG1_PIG	12	13833206	13844295	+	NaN	CACNG1	ENSSSCG00000017271	Voltage-dependent calcium channel gamma-1 subunit [Source:UniProtKB/Swiss-Prot;Acc:Q2MJQ7]	gene	overlapping	0	-2.99805	-2.30222	-2.64773
CCHCR_PIG	7	27275964	27289736	+	NaN	CCHCR1	ENSSSCG00000001391	Coiled-coil alpha-helical rod protein 1 [Source:UniProtKB/Swiss-Prot;Acc:Q9TSV3]	gene	overlapping	0	-1.56338	-2.30222	-1.01808
CCIN	1	264620294	264622060	-	NaN	CCIN	ENSSSCG00000005340	Uncharacterized protein [Source:UniProtKB/TrEMBL;Acc:F1ST87]	gene	overlapping	0	-0.722194	-2.30222	-2.64773
CCKAR	8	20560914	20574004	-	NaN	CCKAR	ENSSSCG00000023501	cholecystokinin A receptor [Source:HGNC Symbol;Acc:1570]	gene	overlapping	0	-1.94738	-2.25156	-2.59706
CCKBR	9	4150666	4158771	+	NaN	CCKBR	ENSSSCG00000014631	Uncharacterized protein [Source:UniProtKB/TrEMBL;Acc:F1RMM2]	gene	overlapping	0	-2.99805	-2.30222	-2.64773
CCKN_PIG	13	28610211	28615330	-	NaN	CCK	ENSSSCG00000011277	Cholecystokinin Cholecystokinin-58 Cholecystokinin-58 desnonopeptide Cholecystokinin-39 Cholecystokinin-33 Cholecystokinin-25 Cholecystokinin-18 Cholecystokinin-12 Cholecystokinin-8 Cholecystokinin-7 Cholecystokinin-5 [Source:UniProtKB/Swiss-Prot;Acc:P01356]	gene	overlapping	0	-2.99805	-2.30222	-2.64773
CCL11	12	42424410	42427043	+	NaN	CCL11	ENSSSCG00000017722	Uncharacterized protein [Source:UniProtKB/TrEMBL;Acc:F1S162]	gene	overlapping	0	-2.99805	-2.30222	-2.64773
CCL16	12	41187680	41190873	+	NaN	CCL16	ENSSSCG00000017704	Uncharacterized protein [Source:UniProtKB/TrEMBL;Acc:F1S198]	gene	overlapping	0	-2.99805	-2.30222	-2.64773
CCL17	6	17342470	17345459	-	NaN	CCL17	ENSSSCG00000023852	Chemokine (C-C motif) ligand 17 [Source:UniProtKB/TrEMBL;Acc:G8XRI4]	gene	overlapping	0	-2.99805	-2.30222	-2.64773
CCL2_PIG	12	42514168	42516128	+	NaN	CCL2	ENSSSCG00000017723	C-C motif chemokine 2 [Source:UniProtKB/Swiss-Prot;Acc:P42831]	gene	overlapping	0	-2.99805	-1.91822	-0.577433
CCL22	6	17288021	17294052	+	NaN	CCL22	ENSSSCG00000002821	Uncharacterized protein [Source:UniProtKB/TrEMBL;Acc:F1RF20]	gene	overlapping	0	2.22721	0.452446	-1.73541
CCL25_PIG	2	71575432	71579336	-	NaN	CCL25	ENSSSCG00000013593	C-C motif chemokine 25 [Source:UniProtKB/Swiss-Prot;Acc:Q4PR21]	gene	overlapping	0	-2.99805	-2.30222	-2.64773
CCL4_PIG	12	41048354	41050166	-	NaN	CCL4	ENSSSCG00000017698	C-C motif chemokine 4 [Source:UniProtKB/Swiss-Prot;Acc:Q711P4]	gene	overlapping	0	-2.99805	-2.30222	-2.64773
CCL5_PIG	12	41222199	41228604	+	NaN	CCL5	ENSSSCG00000017705	C-C motif chemokine 5 [Source:UniProtKB/Swiss-Prot;Acc:Q29288]	gene	overlapping	0	-2.99805	-2.30222	-2.64773
CCL8_PIG	12	42456735	42458844	+	NaN	CCL8	ENSSSCG00000017721	C-C motif chemokine 8 [Source:UniProtKB/Swiss-Prot;Acc:P49873]	gene	overlapping	0	-2.99805	-2.30222	-2.64773
CCM2	18	55227250	55260911	-	NaN	CCM2	ENSSSCG00000016734	Uncharacterized protein [Source:UniProtKB/TrEMBL;Acc:F1ST61]	gene	overlapping	0	-0.228798	-0.709578	-1.77242
CCNA1	11	12355646	12364743	+	NaN	CCNA1	ENSSSCG00000009354	Uncharacterized protein [Source:UniProtKB/TrEMBL;Acc:F1RSR0]	gene	overlapping	0	-0.329902	-1.58489	-2.64773
CCNB1IP1	7	83598033	83602985	+	NaN	CCNB1IP1	ENSSSCG00000002144	Uncharacterized protein [Source:UniProtKB/TrEMBL;Acc:F1S8F8]	gene	overlapping	0	-2.99805	-2.30222	-2.64773
CCNB3	X	48854469	48915925	+	NaN	CCNB3	ENSSSCG00000012307	Cyclin B3 [Source:UniProtKB/TrEMBL;Acc:H1UBL4]	gene	overlapping	0	-0.292121	3.30971	1.82234
CCND1	2	2342270	2343202	+	NaN	CCND1	ENSSSCG00000012873	Uncharacterized protein [Source:UniProtKB/TrEMBL;Acc:F1RY76]	gene	overlapping	0	-2.99805	-2.30222	-2.64773
CCND2_PIG	5	68314898	68331943	-	NaN	CCND2	ENSSSCG00000000727	G1/S-specific cyclin-D2 [Source:UniProtKB/Swiss-Prot;Acc:Q8WNW2]	gene	overlapping	0	-2.99805	-2.30222	-2.59706
CCND3	7	42486007	42493235	-	NaN	BYSL	ENSSSCG00000001631	bystin-like [Source:HGNC Symbol;Acc:1157]	gene	overlapping	0	3.80315	2.54803	3.82644
CCNDBP1	1	143102949	143103909	+	NaN	CCNDBP1	ENSSSCG00000023164	cyclin D-type binding-protein 1 [Source:HGNC Symbol;Acc:1587]	gene	overlapping	0	-2.99805	-1.53422	-2.06874
CCNE1	6	35242727	35254034	+	NaN	CCNE1	ENSSSCG00000002855	Uncharacterized protein [Source:UniProtKB/TrEMBL;Acc:F1RNY7]	gene	overlapping	0	0.573082	0.0447672	1.25595
CCNF	3	42640731	42658428	-	NaN	CCNF	ENSSSCG00000026326	cyclin F [Source:HGNC Symbol;Acc:1591]	gene	overlapping	0	0.990544	2.88998	3.27829
CCNG1_PIG	16	65189480	65197123	-	NaN	CCNG1	ENSSSCG00000017024	Cyclin-G1 [Source:UniProtKB/Swiss-Prot;Acc:Q52QT8]	gene	overlapping	0	9.49801	9.27293	7.63204
CCNG2	8	76989130	76999343	+	NaN	CCNG2	ENSSSCG00000008988	Uncharacterized protein [Source:UniProtKB/TrEMBL;Acc:F1RYS3]	gene	overlapping	0	2.34152	0.647219	-0.0797531
CCNI	8	76887184	76919478	-	NaN	CCNI	ENSSSCG00000008987	Uncharacterized protein [Source:UniProtKB/TrEMBL;Acc:F1RYS4]	gene	overlapping	0	5.94219	6.12907	5.5501
CCNI2	2	140542665	140547652	+	NaN	CCNI2	ENSSSCG00000014284	Uncharacterized protein [Source:UniProtKB/TrEMBL;Acc:F1RJV0]	gene	overlapping	0	-2.99805	-2.30222	-2.64773
CCNJ	14	117154842	117176840	+	NaN	CCNJ	ENSSSCG00000010502	Uncharacterized protein [Source:UniProtKB/TrEMBL;Acc:F1SC31]	gene	overlapping	0	3.6321	4.26304	5.16802
CCNJL	16	68685900	68714006	+	NaN	CCNJL	ENSSSCG00000017036	Uncharacterized protein [Source:UniProtKB/TrEMBL;Acc:F1RR51]	gene	overlapping	0	-2.99805	-2.30222	-0.415624
CCNK	7	128045533	128128114	+	NaN	SETD3	ENSSSCG00000002508	Uncharacterized protein [Source:UniProtKB/TrEMBL;Acc:F1SAQ4]	gene	overlapping	0	5.96276	4.33528	5.22372
CCNL1	13	105144750	105160849	-	NaN	CCNL1	ENSSSCG00000029352	cyclin L1 [Source:HGNC Symbol;Acc:20569]	gene	overlapping	0	5.07596	4.63891	5.48797
CCNL2	6	58269480	58271822	-	NaN	CCNL2	ENSSSCG00000003354	Uncharacterized protein [Source:UniProtKB/TrEMBL;Acc:F1RJC3]	gene	overlapping	0	-1.50674	-0.352781	-0.665111
CCNO	16	36432329	36436067	+	NaN	ENSSSCG00000016904	ENSSSCG00000016904	No description	gene	overlapping	0	-2.99805	-1.3899	-2.26373
CCNT1	5	14923946	15085981	-	NaN	CCNT1	ENSSSCG00000028703	Uncharacterized protein [Source:UniProtKB/TrEMBL;Acc:F1SPN7]	gene	overlapping	0	5.99201	5.97179	5.6328
CCNT2	15	19431039	19473796	-	NaN	CCNT2	ENSSSCG00000015697	Uncharacterized protein [Source:UniProtKB/TrEMBL;Acc:F1S0D2]	gene	overlapping	0	2.43914	3.92948	3.27599
CCR8	13	26273310	26274377	+	NaN	CCR8	ENSSSCG00000025846	chemokine (C-C motif) receptor 8 [Source:HGNC Symbol;Acc:1609]	gene	overlapping	0	-2.99805	-2.30222	-2.64773
CCRL2_PIG	13	32566384	32568453	+	NaN	CCRL2	ENSSSCG00000023557	Chemokine C-C motif receptor-like 2 [Source:UniProtKB/Swiss-Prot;Acc:Q75ZH0]	gene	overlapping	0	-2.99805	-2.30222	-2.64773
CCRN4L	8	93479433	93503333	-	NaN	CCRN4L	ENSSSCG00000024596	CCR4 carbon catabolite repression 4-like (S. cerevisiae) [Source:HGNC Symbol;Acc:14254]	gene	overlapping	0	3.97628	3.52904	4.50582
CCT4	3	83760113	83777463	+	NaN	CCT4	ENSSSCG00000008377	T-complex protein 1 subunit delta [Source:UniProtKB/TrEMBL;Acc:F1SQN1]	gene	overlapping	0	6.73942	7.06621	7.47494
CCT6B	12	41776793	41788106	+	NaN	CCT6B	ENSSSCG00000022196	chaperonin containing TCP1, subunit 6B (zeta 2) [Source:HGNC Symbol;Acc:1621]	gene	overlapping	0	-2.99805	-1.72323	-2.64773
CCT8	13	202710194	202726027	-	NaN	CCT8	ENSSSCG00000026761	chaperonin containing TCP1, subunit 8 (theta) [Source:HGNC Symbol;Acc:1623]	gene	overlapping	0	6.47391	7.0584	7.58129
[truncated: 17,637 more rows]

## Sheet: 29 DEGs C-IVF vs Natur-IVF
Probe	Chromosome	Start	End	Strand	FDR	Feature	ID	Description	Type	Orientation	Distance	C-IVF	Natur-IVF	log2FC=log2(Control)-log2(Fluids)	FC=2^log2FC	FC(log)=-1/value if value is <0 and >1
ACAT1	9	40601622	40622159	+	0.024014134	ACAT1	ENSSSCG00000026153	acetyl-CoA acetyltransferase 1 [Source:HGNC Symbol;Acc:93]	gene	overlapping	0	7.68896	6.11376	1.57521	2.97978
AK3	1	243072943	243098761	+	0.0016167094	AK3	ENSSSCG00000023595	Uncharacterized protein [Source:UniProtKB/TrEMBL;Acc:F1SK45]	gene	overlapping	0	-1.96093	3.46136	-5.42229	0.02332	-42.8817
157657	4	44707161	44728142	-	0.042855494	C8ORF37	ENSSSCG00000006092	Uncharacterized protein [Source:UniProtKB/TrEMBL;Acc:F1RY59]	gene	overlapping	0	1.63467	-2.30222	3.9369	15.3153
DHX40	12	36623479	36670447	-	0.042855494	DHX40	ENSSSCG00000017665	Uncharacterized protein [Source:UniProtKB/TrEMBL;Acc:F1S235]	gene	overlapping	0	2.68788	4.81686	-2.12898	0.228619	-4.3741
NP_001177215.1	5	86272186	86308016	-	0.014218532	DRAM1	ENSSSCG00000023972	DNA damage-regulated autophagy modulator protein 1 [Source:RefSeq peptide;Acc:NP_001177215]	gene	overlapping	0	1.57621	4.25368	-2.67746	0.156316	-6.39731
KIF4A	X	63514729	63642348	+	0.0037001409	ENSSSCG00000012377	ENSSSCG00000012377	Uncharacterized protein [Source:UniProtKB/TrEMBL;Acc:F1RTL0]	gene	overlapping	0	4.19787	6.39167	-2.19379	0.218576	-4.57507
ENSSSCG00000015902	15	79683636	79795742	-	0.029206432	ENSSSCG00000015902	ENSSSCG00000015902	No description	gene	overlapping	0	6.80406	5.02129	1.78277	3.44086
ENSSSCG00000027958	7	22544483	22547649	-	0.03146353	ENSSSCG00000027958	ENSSSCG00000027958	Uncharacterized protein [Source:UniProtKB/TrEMBL;Acc:F1RQ93]	gene	overlapping	0	3.08028	-0.898591	3.97887	15.7674
HERC5	8	139945979	139974969	-	0.0037001409	ENSSSCG00000030548	ENSSSCG00000030548	Uncharacterized protein [Source:UniProtKB/TrEMBL;Acc:F1RW63]	gene	overlapping	0	-2.99805	1.71143	-4.70948	0.0382212	-26.1635
FEM1C	2	124628609	124644415	-	0.035916407	FEM1C	ENSSSCG00000014217	Uncharacterized protein [Source:UniProtKB/TrEMBL;Acc:F1RLE6]	gene	overlapping	0	2.83443	4.81921	-1.98478	0.252651	-3.95804
GPRC5B	3	26734480	26751349	-	0.040564664	GPRC5B	ENSSSCG00000007864	Uncharacterized protein [Source:UniProtKB/TrEMBL;Acc:F1RPA3]	gene	overlapping	0	-2.99805	1.37053	-4.36858	0.0484091	-20.6573
HSPA12A	14	138170746	138246086	-	0.024014134	HSPA12A	ENSSSCG00000010662	Uncharacterized protein [Source:UniProtKB/TrEMBL;Acc:F1S4S5]	gene	overlapping	0	-0.749067	4.2591	-5.00817	0.0310735	-32.1818
ISOC1	2	137198380	137219941	+	0.03388514	ISOC1	ENSSSCG00000014258	Uncharacterized protein [Source:UniProtKB/TrEMBL;Acc:F1RKJ9]	gene	overlapping	0	1.42119	3.90981	-2.48863	0.178176	-5.61243
KIT_PIG	8	43550236	43602062	+	0.0103605995	KIT	ENSSSCG00000008842	Mast/stem cell growth factor receptor Kit [Source:UniProtKB/Swiss-Prot;Acc:Q2HWD6]	gene	overlapping	0	-2.23005	2.40281	-4.63286	0.040306	-24.8102
MORF4L2	X	98343236	98344102	-	0.012300011	MORF4L2	ENSSSCG00000012534	Uncharacterized protein [Source:UniProtKB/TrEMBL;Acc:F1RYC6]	gene	overlapping	0	0.729359	3.93577	-3.20641	0.108336	-9.23053
C1ORF115	10	12317328	12329170	-	0.029200519	MOSC1	ENSSSCG00000010829	Uncharacterized protein [Source:UniProtKB/TrEMBL;Acc:F1S9I6]	gene	overlapping	0	5.88896	3.92059	1.96837	3.91326
MPP6	18	52549880	52661454	-	0.03926266	MPP6	ENSSSCG00000016717	Uncharacterized protein [Source:UniProtKB/TrEMBL;Acc:F1ST93]	gene	overlapping	0	-2.99805	1.59272	-4.59077	0.0414993	-24.0968
MPZL3	9	50578633	50605184	-	0.012300011	MPZL3	ENSSSCG00000015090	Uncharacterized protein [Source:UniProtKB/TrEMBL;Acc:F1SAL0]	gene	overlapping	0	0.462223	4.12722	-3.665	0.0788362	-12.6845
MTA3	3	103781462	103822042	+	0.042575367	MTA3	ENSSSCG00000008464	metastasis associated 1 family, member 3 [Source:HGNC Symbol;Acc:23784]	gene	overlapping	0	-0.122739	3.19032	-3.31306	0.100616	-9.93873
MYL9_PIG	17	45264861	45272225	+	0.042855494	MYL9	ENSSSCG00000024230	Myosin regulatory light polypeptide 9 [Source:UniProtKB/Swiss-Prot;Acc:P29269]	gene	overlapping	0	5.34163	3.26303	2.0786	4.22396
NTRK3_PIG	1	212938361	213258768	+	0.033864096	NTRK3	ENSSSCG00000005106	NT-3 growth factor receptor [Source:UniProtKB/Swiss-Prot;Acc:P24786]	gene	overlapping	0	4.29225	0.901386	3.39087	10.4894
MPRB_PIG	7	52635491	52682127	+	0.023979418	PAQR8	ENSSSCG00000001750	Membrane progestin receptor beta [Source:UniProtKB/Swiss-Prot;Acc:Q865K9]	gene	overlapping	0	-1.70173	2.36101	-4.06274	0.0598403	-16.7111
NP_001157273.1	8	59064675	59139438	-	0.0016167094	POLR2B	ENSSSCG00000022955	polymerase (RNA) II (DNA directed) polypeptide B, 140kDa [Source:HGNC Symbol;Acc:9188]	gene	overlapping	0	0.551383	4.14674	-3.59536	0.0827351	-12.0868
PTPN14	9	142083587	142135830	+	0.009776971	PTPN14	ENSSSCG00000015582	Uncharacterized protein [Source:UniProtKB/TrEMBL;Acc:F1S2Y4]	gene	overlapping	0	4.51697	1.85072	2.66626	6.3478
REEP1	3	61264821	61326096	-	0.033864096	REEP1	ENSSSCG00000023710	receptor accessory protein 1 [Source:HGNC Symbol;Acc:25786]	gene	overlapping	0	-2.99805	1.70051	-4.69856	0.0385117	-25.9661
CCNK	7	128045533	128128114	+	0.046831112	SETD3	ENSSSCG00000002508	Uncharacterized protein [Source:UniProtKB/TrEMBL;Acc:F1SAQ4]	gene	overlapping	0	5.96276	4.33528	1.62747	3.08971
UBR2	7	43111914	43215461	+	0.006541484	UBR2	ENSSSCG00000001641	Uncharacterized protein [Source:UniProtKB/TrEMBL;Acc:F1RUT9]	gene	overlapping	0	1.65257	4.81723	-3.16466	0.111517	-8.96721
UGCG	1	283440944	283479545	+	0.040564664	UGCG	ENSSSCG00000022780	Uncharacterized protein [Source:UniProtKB/TrEMBL;Acc:F1SNB1]	gene	overlapping	0	3.61262	5.78375	-2.17112	0.222038	-4.50374
UHRF1BP1	7	35474279	35538654	+	0.012169391	UHRF1BP1	ENSSSCG00000001532	Uncharacterized protein [Source:UniProtKB/TrEMBL;Acc:F1RZ15]	gene	overlapping	0	3.09859	-1.15022	4.24882	19.0117

## Sheet: 621 DEGs In vivo vs Natur-IVF
Probe	Chromosome	Start	End	Strand	FDR	Feature	ID	Description	Type	Orientation	Distance	Natur-IVF	In vivo	log2FC=log2(Fluids)-log2(InVivo)	Fold Change	FC(log)=-1/value if value is <0 and >1	For all values down-regulated with FC(log) between 0 and 1, the equivalent value converted by -1/value is shown
ABCA1	1	275740052	275862912	-	783.131	ABCA1	ENSSSCG00000005423	Uncharacterized protein [Source:UniProtKB/TrEMBL;Acc:F1SP55]	gene	Name match	0	4.23715	1.85103	2.38612	5.2275
ABCC2	14	120400796	120478568	+	1.44325e-08	ABCC2	ENSSSCG00000010543	Uncharacterized protein [Source:UniProtKB/TrEMBL;Acc:F1S8V9]	gene	Name match	0	7.03525	3.81081	3.22444	9.34657
ABCG2_PIG	8	140193310	140228767	+	1.24493	null				Not found	0	6.26957	4.15015	2.11942	4.3452
ABHD2	7	59631041	59745342	+	0.03964484	ABHD2	ENSSSCG00000001835	Uncharacterized protein [Source:UniProtKB/TrEMBL;Acc:F1SKQ2]	gene	Name match	0	2.978	-0.850576	3.82857	14.2074
ABHD4	7	81641000	81656264	-	0.0729498	ABHD4	ENSSSCG00000002051	Uncharacterized protein [Source:UniProtKB/TrEMBL;Acc:F1S9A3]	gene	Name match	0	5.47739	1.87704	3.60036	12.1287
ACAT2	1	9399577	9411773	-	0.006038375	ACAT2	ENSSSCG00000004049	Uncharacterized protein [Source:UniProtKB/TrEMBL;Acc:F1SB62]	gene	Name match	0	7.71857	6.66449	1.05407	2.07639
ACCN3	5	16354868	16364821	-	0.005070154	ACCN3	ENSSSCG00000000216	Uncharacterized protein [Source:UniProtKB/TrEMBL;Acc:F1SH99]	gene	Name match	0	1.3667	-2.64773	4.01443	16.1608
ACOD_PIG	14	120964210	120980992	+	0.004265549	null				Not found	0	9.20746	8.20497	1.00249	2.00346
ADAM19	16	71570441	71669557	+	7.25242e-05	ADAM19	ENSSSCG00000017052	Uncharacterized protein [Source:UniProtKB/TrEMBL;Acc:F1RQF1]	gene	Name match	0	7.40954	2.86454	4.545	23.3443
ADAM-9	15	54597519	54674520	-	79.818	ADAM-9	ENSSSCG00000015808	Uncharacterized protein [Source:UniProtKB/TrEMBL;Acc:F1RZL4]	gene	Name match	0	6.83113	4.81196	2.01917	4.0535
ADH5	8	130451260	130466903	+	0.02871799	ADH5	ENSSSCG00000009185	Uncharacterized protein [Source:UniProtKB/TrEMBL;Acc:F1S0C1]	gene	Name match	0	4.55522	5.98415	-1.42893	0.371406	-2.69247
ADT3_PIG	X	113743291	113746276	-	0.01475188	null				Not found	0	6.01942	7.59965	-1.58023	0.334429	-2.99018
AEN	1	212633409	212644737	-	811.381	AEN	ENSSSCG00000005102	Uncharacterized protein [Source:UniProtKB/TrEMBL;Acc:F1SRT3]	gene	Name match	0	6.36274	4.85486	1.50788	2.84393
AGXT2L2	2	81754512	81803544	+	0.009306633	AGXT2L2	ENSSSCG00000014030	Uncharacterized protein [Source:UniProtKB/TrEMBL;Acc:F1S421]	gene	Name match	0	6.56627	7.83666	-1.27038	0.41455	-2.41225
AHNAK	2	8544927	8553182	+	0.02584329	AHNAK	ENSSSCG00000027969	AHNAK nucleoprotein [Source:HGNC Symbol;Acc:347]	gene	Name match	0	10.0047	9.22602	0.778648	1.71552
AIF1_PIG	7	27520797	27522821	-	0.003224	null				Not found	0	4.56617	-0.967408	5.53358	46.3205
AK3	1	243072943	243098761	+	12.137	AK3	ENSSSCG00000023595	Uncharacterized protein [Source:UniProtKB/TrEMBL;Acc:F1SK45]	gene	Name match	0	3.46136	-1.5464	5.00776	32.1725
AKAP12	1	17317257	17322146	-	192.266	AKAP12	ENSSSCG00000004091	Uncharacterized protein [Source:UniProtKB/TrEMBL;Acc:F1S7W0]	gene	Name match	0	1.61235	4.63557	-3.02321	0.123005	-8.12977
ALDH4A1	6	71494050	71512649	+	0.004270478	ALDH4A1	ENSSSCG00000024752	aldehyde dehydrogenase 4 family, member A1 [Source:HGNC Symbol;Acc:406]	gene	Name match	0	5.61739	3.93404	1.68335	3.21173
ALG14	4	134085867	134202787	+	0.014389138	ALG14	ENSSSCG00000006885	Uncharacterized protein [Source:UniProtKB/TrEMBL;Acc:F1S544]	gene	Name match	0	2.10749	-1.43909	3.54658	11.685
ALS2CR8	15	117869022	117914168	+	0.022530539	ALS2CR8	ENSSSCG00000016117	Uncharacterized protein [Source:UniProtKB/TrEMBL;Acc:F1SHE7]	gene	Name match	0	5.03655	6.46828	-1.43172	0.370687	-2.69769
AMFR	6	26738903	26754724	+	518.927	AMFR	ENSSSCG00000002822	Uncharacterized protein [Source:UniProtKB/TrEMBL;Acc:F1RF19]	gene	Name match	0	3.65928	0.0980576	3.56122	11.8041
AMPE_PIG	8	119969524	120061196	-	335.782	null				Not found	0	1.66685	-2.64773	4.31458	19.8984
ANKRD22	14	109732654	109744247	-	279.22	ANKRD22	ENSSSCG00000010445	Uncharacterized protein [Source:UniProtKB/TrEMBL;Acc:F1SCY9]	gene	Name match	0	2.81587	-2.06874	4.88461	29.5403
ANKRD44	15	112052130	112388886	-	0.006552792	ANKRD44	ENSSSCG00000016074	Uncharacterized protein [Source:UniProtKB/TrEMBL;Acc:F1SN09]	gene	Name match	0	3.36404	0.880699	2.48334	5.59192
ANO5	2	40382284	40466246	-	0.0032966337	ANO5	ENSSSCG00000013344	Uncharacterized protein [Source:UniProtKB/TrEMBL;Acc:F1SFZ1]	gene	Name match	0	3.62282	-0.0599195	3.68273	12.8414
ANXA5	8	109609049	109642588	+	0.937933	ANXA5	ENSSSCG00000009097	annexin A5 [Source:HGNC Symbol;Acc:543]	gene	Name match	0	6.30559	3.82469	2.48089	5.58243
AP4B1	4	116862014	116874408	+	0.043336824	AP4B1	ENSSSCG00000006762	Uncharacterized protein [Source:UniProtKB/TrEMBL;Acc:F1SBR2]	gene	Name match	0	2.22433	-0.998445	3.22277	9.33578
APAF1	5	89443105	89581082	-	0.011420691	APAF1	ENSSSCG00000000884	Uncharacterized protein [Source:UniProtKB/TrEMBL;Acc:F1SQT5]	gene	Name match	0	3.33566	0.353236	2.98242	7.90312
APEX2	X	53798772	53806945	+	0.015694994	APEX2	ENSSSCG00000012348	Uncharacterized protein [Source:UniProtKB/TrEMBL;Acc:F1RUD3]	gene	Name match	0	1.45223	3.86946	-2.41723	0.187215	-5.34144
ARAP2	8	29136986	29327348	-	0.030783651	ARAP2	ENSSSCG00000008768	Uncharacterized protein [Source:UniProtKB/TrEMBL;Acc:F1S4M1]	gene	Name match	0	4.23448	2.75086	1.48361	2.79649
ARFGAP3	5	3367604	3498052	+	0.023919208	ARFGAP3	ENSSSCG00000000037	Uncharacterized protein [Source:UniProtKB/TrEMBL;Acc:F1SJR4]	gene	Name match	0	3.17648	0.461059	2.71542	6.56784
ARGI1_PIG	1	35580461	35594611	-	0.0049543856	null				Not found	0	5.49096	3.55841	1.93254	3.81727
ARHGAP32	9	61997169	62189255	-	0.039412186	ARHGAP32	ENSSSCG00000015238	Uncharacterized protein [Source:UniProtKB/TrEMBL;Acc:F1S6F5]	gene	Name match	0	4.40333	2.94522	1.45812	2.74749
ARSJ	8	116839714	116841212	+	0.044604547	ARSJ	ENSSSCG00000009122	arylsulfatase family, member J [Source:HGNC Symbol;Acc:26286]	gene	Name match	0	0.70386	-2.64773	3.35159	10.2077
ASAH1	17	6296100	6333861	-	5.60826e-05	ASAH1	ENSSSCG00000006995	N-acylsphingosine amidohydrolase (acid ceramidase) 1 [Source:HGNC Symbol;Acc:735]	gene	Name match	0	6.52525	3.47615	3.0491	8.27693
ASF1A	1	48348376	48365616	-	0.013199733	ASF1A	ENSSSCG00000004247	Uncharacterized protein [Source:UniProtKB/TrEMBL;Acc:F1SF37]	gene	Name match	0	3.66013	5.3954	-1.73526	0.300354	-3.3294
ATP13A3	13	140888272	141023097	-	0.0016772649	ATP13A3	ENSSSCG00000011825	Uncharacterized protein [Source:UniProtKB/TrEMBL;Acc:F1SFG4]	gene	Name match	0	5.74924	7.47554	-1.7263	0.302227	-3.30877
ATP6V0D1	6	25355171	25399156	-	0.045175668	ATP6V0D1	ENSSSCG00000002776	Uncharacterized protein [Source:UniProtKB/TrEMBL;Acc:F2Z5H6]	gene	Name match	0	5.73516	4.41577	1.31939	2.4956
ATP8A1	8	35180992	35309867	-	786.788	ATP8A1	ENSSSCG00000008803	Uncharacterized protein [Source:UniProtKB/TrEMBL;Acc:F1S3T6]	gene	Name match	0	6.19168	4.44551	1.74618	3.35469
B4GALT5	17	57581157	57602483	-	0.013050863	B4GALT5	ENSSSCG00000007465	Uncharacterized protein [Source:UniProtKB/TrEMBL;Acc:F1SBE4]	gene	Name match	0	6.16839	4.84276	1.32564	2.50643
BAD	2	6897945	6909698	+	0.016274327	BAD	ENSSSCG00000013033	BCL2-associated agonist of cell death [Source:HGNC Symbol;Acc:936]	gene	Name match	0	-1.20089	3.07243	-4.27332	0.0517133	-19.3374
BAK1	7	34279881	34288116	+	0.0039905678	BAK1	ENSSSCG00000001516	Uncharacterized protein [Source:UniProtKB/TrEMBL;Acc:F1RZR2]	gene	Name match	0	2.59452	5.58423	-2.98971	0.125895	-7.94313
BCAN	4	102095809	102114619	-	0.01475188	BCAN	ENSSSCG00000006477	Uncharacterized protein [Source:UniProtKB/TrEMBL;Acc:F1RP38]	gene	Name match	0	-1.53422	2.39153	-3.92575	0.0658008	-15.1974
BGLR_PIG	3	16924757	16939447	+	0.010087643	null				Not found	0	2.67053	-0.69829	3.36882	10.3304
BMPR1B	8	133740991	133875493	-	0.0012145633	BMPR1B	ENSSSCG00000029621	Uncharacterized protein [Source:UniProtKB/TrEMBL;Acc:F1RWW6]	gene	Name match	0	2.68373	-1.5464	4.23012	18.7669
BNC2	1	229662567	230108309	+	52.731	BNC2	ENSSSCG00000025613	Uncharacterized protein [Source:UniProtKB/TrEMBL;Acc:F1SNE1]	gene	Name match	0	2.98523	-2.1624	5.14762	35.4477
BTBD2	2	77259222	77264841	+	19.591	BTBD2	ENSSSCG00000013444	Uncharacterized protein [Source:UniProtKB/TrEMBL;Acc:F1SDH6]	gene	Name match	0	3.67873	-0.665111	4.34384	20.306
C12ORF66	5	32012009	32033452	+	0.023919208	C12ORF66	ENSSSCG00000030352	Uncharacterized protein [Source:UniProtKB/TrEMBL;Acc:F1SKB6]	gene	Name match	0	1.96694	-0.772421	2.73936	6.67776
C1ORF85	4	102459048	102461635	+	0.028088098	C1ORF85	ENSSSCG00000006488	Uncharacterized protein [Source:UniProtKB/TrEMBL;Acc:F1RP16]	gene	Name match	0	3.82249	0.537036	3.28545	9.75032
C6ORF115	1	28570438	28585823	-	1570.86	C6ORF115	ENSSSCG00000004145	Uncharacterized protein [Source:UniProtKB/TrEMBL;Acc:F1S6Z3]	gene	Name match	0	7.03713	5.16892	1.86821	3.65079
CALCOCO2	12	25005401	25036657	+	0.0035426402	CALCOCO2	ENSSSCG00000017543	Uncharacterized protein [Source:UniProtKB/TrEMBL;Acc:F1RWF7]	gene	Name match	0	4.26112	1.83194	2.42918	5.38588
CAN1_PIG	2	6129549	6155373	-	0.040036913	null				Not found	0	4.66247	3.05615	1.60632	3.04474
CASQ2_PIG	4	115007632	115070760	+	0.027280873	null				Not found	0	2.10825	-1.54042	3.64867	12.5418
CAST	2	106934106	107128389	+	0.0021470373	CAST	ENSSSCG00000014170	Calpastatin [Source:UniProtKB/Swiss-Prot;Acc:P12675]	gene	Name match	0	3.91527	0.314422	3.60085	12.1329
CATA_PIG	2	28860746	28900838	-	0.017795406	null				Not found	0	6.37392	4.68432	1.68961	3.22569
CATB_PIG	14	16202844	16223503	-	74.2436	null				Not found	0	5.52399	2.63032	2.89366	7.43155
CATSPERG	6	42753692	42782998	+	0.01962838	CATSPERG	ENSSSCG00000002955	Uncharacterized protein [Source:UniProtKB/TrEMBL;Acc:F1RKJ0]	gene	Name match	0	1.16687	-2.64773	3.81461	14.0705
CCDC150	15	111555522	111634452	-	0.01475188	CCDC150	ENSSSCG00000016069	Uncharacterized protein [Source:UniProtKB/TrEMBL;Acc:F1SN15]	gene	Name match	0	1.00971	-2.64773	3.65744	12.6182
CCNG1_PIG	16	65189480	65197123	-	149.914	null				Not found	0	9.27293	7.63204	1.64089	3.11859
CD109	1	103136948	103292012	-	0.02155314	CD109	ENSSSCG00000004485	Uncharacterized protein [Source:UniProtKB/TrEMBL;Acc:F1RQH9]	gene	Name match	0	2.02853	-1.66128	3.68981	12.9046
CD44	2	28157168	28249956	-	0.0025549908	CD44	ENSSSCG00000013297	CD44 molecule (Indian blood group) [Source:HGNC Symbol;Acc:1681]	gene	Name match	0	2.27515	-2.06874	4.3439	20.3069
CD63	5	22651967	22654950	-	0.0146901	CD63	ENSSSCG00000000361	Uncharacterized protein [Source:UniProtKB/TrEMBL;Acc:F1SPK8]	gene	Name match	0	7.98095	5.82806	2.15289	4.44717
CDKN1A	7	37258053	37267163	+	16.95	CDKN1A	ENSSSCG00000022111	Uncharacterized protein [Source:UniProtKB/TrEMBL;Acc:F1RVT3]	gene	Name match	0	5.71165	2.33832	3.37333	10.3627
CENPJ	11	87284460	87296331	-	0.024962133	CENPJ	ENSSSCG00000029393	centromere protein J [Source:HGNC Symbol;Acc:17272]	gene	Name match	0	1.74804	3.89929	-2.15125	0.225118	-4.44212
CHAF1A	2	74873606	74904761	-	0.0228892	CHAF1A	ENSSSCG00000013509	Uncharacterized protein [Source:UniProtKB/TrEMBL;Acc:F1S7L7]	gene	Name match	0	3.36577	5.16288	-1.79711	0.287751	-3.47523
CHD1L	4	110094460	110148302	-	0.03313155	CHD1L	ENSSSCG00000006701	Uncharacterized protein [Source:UniProtKB/TrEMBL;Acc:F1SDB8]	gene	Name match	0	3.91811	2.2845	1.63361	3.10289
CHPT1	5	86457216	86497240	-	0.016544972	CHPT1	ENSSSCG00000000864	choline phosphotransferase 1 [Source:HGNC Symbol;Acc:17852]	gene	Name match	0	3.50007	1.41922	2.08086	4.23058
CIAPIN1	6	17323824	17336023	+	0.046115372	CIAPIN1	ENSSSCG00000029519	cytokine induced apoptosis inhibitor 1 [Source:HGNC Symbol;Acc:28050]	gene	Name match	0	3.48274	5.06286	-1.58012	0.334455	-2.98994
CIB2	7	53340541	53365176	+	1330.81	CIB2	ENSSSCG00000001762	Uncharacterized protein [Source:UniProtKB/TrEMBL;Acc:F2Z527]	gene	Name match	0	3.41116	-0.0316231	3.44278	10.8738
CLCN5_PIG	X	48706066	48736547	+	0.016572677	null				Not found	0	5.14672	6.72186	-1.57513	0.335612	-2.97963
CLK4	2	81344460	81369483	+	0.006157625	CLK4	ENSSSCG00000014028	Uncharacterized protein [Source:UniProtKB/TrEMBL;Acc:F1S424]	gene	Name match	0	4.17898	5.97421	-1.79523	0.288126	-3.47071
CNGB1	6	17785742	17839804	+	0.031477775	CNGB1	ENSSSCG00000002811	Uncharacterized protein [Source:UniProtKB/TrEMBL;Acc:F1RF40]	gene	Name match	0	0.0767419	-2.64773	2.72447	6.60919
CNN2_PIG	2	77612062	77622362	+	0.0036180867	null				Not found	0	2.31807	-1.68474	4.00281	16.0312
COASY_PIG	12	20471075	20475435	-	208.221	null				Not found	0	3.62785	-0.2441	3.87195	14.6411
COL4A3BP	2	86053893	86174034	-	0.027004912	COL4A3BP	ENSSSCG00000014081	Uncharacterized protein [Source:UniProtKB/TrEMBL;Acc:F1S2I3]	gene	Name match	0	5.88667	4.78935	1.09731	2.13956
COMMD4	7	62965339	62971658	-	0.018074011	COMMD4	ENSSSCG00000001884	COMM domain containing 4 [Source:HGNC Symbol;Acc:26027]	gene	Name match	0	4.77195	3.19731	1.57464	2.97862
COPG2	18	19229658	19330534	+	0.043336824	COPG2	ENSSSCG00000016553	Coatomer subunit gamma [Source:UniProtKB/TrEMBL;Acc:F6JTE1]	gene	Name match	0	4.19001	2.61632	1.57368	2.97664
COPS8	15	151269647	151279504	+	0.01185265	COPS8	ENSSSCG00000016323	Uncharacterized protein [Source:UniProtKB/TrEMBL;Acc:F1SM07]	gene	Name match	0	3.7235	5.38824	-1.66474	0.315402	-3.17056
COPT1_PIG	1	284727821	284751025	+	0.018031431	null				Not found	0	5.99291	4.88141	1.1115	2.1607
COX3_PIG	MT	8624	9407	+	0.03050001	null				Not found	0	10.9057	12.3004	-1.39465	0.380337	-2.62925
COX8C	7	121313116	121314327	+	12.2524	COX8C	ENSSSCG00000002462	Uncharacterized protein [Source:UniProtKB/TrEMBL;Acc:F1SD52]	gene	Name match	0	2.82909	-2.64773	5.47682	44.5335
CP242_PIG	14	116299374	116337991	+	0.032022137	null				Not found	0	3.77265	5.30183	-1.52917	0.346476	-2.88621
CP51A_PIG	9	78792885	78814967	-	0.007828296	null				Not found	0	7.27962	1.513	5.76662	54.4409
CPXM2	14	144881645	145010683	-	157.783	CPXM2	ENSSSCG00000010728	Uncharacterized protein [Source:UniProtKB/TrEMBL;Acc:F1SEC6]	gene	Name match	0	2.29806	-2.64773	4.9458	30.82
CREBRF	16	55464124	55496215	-	0.021841597	CREBRF	ENSSSCG00000016986	CREB3 regulatory factor [Source:HGNC Symbol;Acc:24050]	gene	Name match	0	2.49618	4.47759	-1.9814	0.253243	-3.94877
CTDSPL	13	24871055	24994231	-	0.010371051	CTDSPL	ENSSSCG00000028740	Uncharacterized protein [Source:UniProtKB/TrEMBL;Acc:F1RRB9]	gene	Name match	0	3.71927	1.45797	2.2613	4.79423
CTIF	1	107666405	108030895	+	7509.46	CTIF	ENSSSCG00000004506	Uncharacterized protein [Source:UniProtKB/TrEMBL;Acc:F1RPR2]	gene	Name match	0	3.64866	0.375841	3.27282	9.66536
CTL2_PIG	2	69768300	69782734	+	0.029776365	null				Not found	0	4.36153	2.66065	1.70088	3.251
CTNNAL1	1	280535474	280609024	-	0.0018577271	CTNNAL1	ENSSSCG00000005443	Uncharacterized protein [Source:UniProtKB/TrEMBL;Acc:F1SP25]	gene	Name match	0	6.06673	4.63598	1.43075	2.69587
CTPS	6	157249207	157280736	-	0.043336824	CTPS	ENSSSCG00000003973	Uncharacterized protein [Source:UniProtKB/TrEMBL;Acc:F1SF78]	gene	Name match	0	4.19731	5.56108	-1.36377	0.388565	-2.57357
CTSL1	10	31907424	31913492	-	0.013199733	CTSL1	ENSSSCG00000010948	cathepsin L1 [Source:HGNC Symbol;Acc:2537]	gene	Name match	0	5.16351	3.48679	1.67672	3.19701
CXL16_PIG	12	54265516	54269345	+	18.6979	null				Not found	0	3.24015	-1.87973	5.11988	34.7725
DBR1	13	86505723	86509907	+	0.03255606	DBR1	ENSSSCG00000028152	debranching enzyme homolog 1 (S. cerevisiae) [Source:HGNC Symbol;Acc:15594]	gene	Name match	0	0.239755	3.25188	-3.01213	0.123953	-8.06754
DDB1	2	9718645	9748655	+	0.0028671324	DDB1	ENSSSCG00000013094	Uncharacterized protein [Source:UniProtKB/TrEMBL;Acc:F1RIE2]	gene	Name match	0	5.54697	4.04602	1.50095	2.83028
DDX3X	Y	1115738	1132911	+	6.51203e-17	DDX3X	ENSSSCG00000026430	DEAD/H box Y [Source:UniProtKB/TrEMBL;Acc:Q8HZ78]	gene	Name match	0	5.64616	-0.893277	6.53944	93.0179
DGKA_PIG	5	22811683	22835859	+	0.971093	null				Not found	0	5.30985	2.49795	2.81191	7.02212
DHX40	12	36623479	36670447	-	0.013199733	DHX40	ENSSSCG00000017665	Uncharacterized protein [Source:UniProtKB/TrEMBL;Acc:F1S235]	gene	Name match	0	4.81686	2.98234	1.83452	3.56653
DLG1	13	142336267	142629535	+	0.0031138153	DLG1	ENSSSCG00000011833	Uncharacterized protein [Source:UniProtKB/TrEMBL;Acc:F1SQX7]	gene	Name match	0	7.21014	6.0823	1.12784	2.18532
DNAJC13	13	81147748	81278882	+	0.03521169	DNAJC13	ENSSSCG00000011628	Uncharacterized protein [Source:UniProtKB/TrEMBL;Acc:F1SPE9]	gene	Name match	0	7.20509	6.42028	0.784802	1.72286
DNAJC21	16	21425596	21454112	+	0.013377153	DNAJC21	ENSSSCG00000016828	Uncharacterized protein [Source:UniProtKB/TrEMBL;Acc:F1SND3]	gene	Name match	0	4.15656	6.41379	-2.25723	0.209174	-4.78071
DOCK9	11	74997784	75158789	-	1190.31	DOCK9	ENSSSCG00000022112	Uncharacterized protein [Source:UniProtKB/TrEMBL;Acc:F1RP30]	gene	Name match	0	5.02924	3.05181	1.97743	3.93792
DPCD	14	122360577	122381270	+	73.4253	DPCD	ENSSSCG00000010565	Uncharacterized protein [Source:UniProtKB/TrEMBL;Acc:F1S8U0]	gene	Name match	0	5.22553	3.10403	2.12149	4.35144
DPP4_PIG	15	76152553	76235536	-	0.37204	null				Not found	0	6.88309	3.81517	3.06792	8.38564
DSG2	6	108046594	108081930	+	0.049003165	DSG2	ENSSSCG00000022739	desmoglein 2 [Source:HGNC Symbol;Acc:3049]	gene	Name match	0	8.42205	7.7662	0.655852	1.57555
DSG3	6	107987898	108009075	+	0.000501733	DSG3	ENSSSCG00000027160	desmoglein 3 [Source:HGNC Symbol;Acc:3050]	gene	Name match	0	4.20997	-1.5464	5.75637	54.0553
EBF3	14	150935646	151052955	-	0.0275178	EBF3	ENSSSCG00000010757	early B-cell factor 3 [Source:HGNC Symbol;Acc:19087]	gene	Name match	0	0.857236	-2.5464	3.40363	10.5827
ECE1	6	73662021	73717839	-	0.0038150444	ECE1	ENSSSCG00000003513	Uncharacterized protein [Source:UniProtKB/TrEMBL;Acc:F1SU04]	gene	Name match	0	1.35238	-2.64773	4.00011	16.0012
EFNA1_PIG	4	103449082	103455256	-	0.014629469	null				Not found	0	4.45335	2.08665	2.3667	5.1576
EFTUD1	7	56401052	56449741	+	0.035379373	EFTUD1	ENSSSCG00000001792	Uncharacterized protein [Source:UniProtKB/TrEMBL;Acc:F1RID1]	gene	Name match	0	3.86351	2.26917	1.59435	3.01958
EIF2B1	14	31047794	31060213	+	0.02475825	EIF2B1	ENSSSCG00000009770	Uncharacterized protein [Source:UniProtKB/TrEMBL;Acc:F1RFL6]	gene	Name match	0	3.7575	2.06735	1.69015	3.2269
EIF2S2	17	42529677	42538137	-	0.022740027	EIF2S2	ENSSSCG00000025566	eukaryotic translation initiation factor 2, subunit 2 beta, 38kDa [Source:HGNC Symbol;Acc:3266]	gene	Name match	0	2.8308	0.270674	2.56013	5.8976
EIF2S3	Y	1277624	1297330	+	3.32182e-14	ENSSSCG00000012178	ENSSSCG00000012178	No description	gene	Name match	0	5.54988	-2.26373	7.81361	224.974
EIF5B	3	57496094	57541127	-	0.0013292955	EIF5B	ENSSSCG00000008180	Uncharacterized protein [Source:UniProtKB/TrEMBL;Acc:F1STE8]	gene	Name match	0	7.73753	9.25826	-1.52073	0.34851	-2.86935
ENPP5	7	47233554	47250001	+	0.014555934	ENPP5	ENSSSCG00000001715	ectonucleotide pyrophosphatase/phosphodiesterase 5 (putative) [Source:HGNC Symbol;Acc:13717]	gene	Name match	0	5.61425	4.33451	1.27974	2.42795
ENSSSCG00000002345	7	102665568	102680830	+	0.009858552	ENSSSCG00000002345	ENSSSCG00000002345	Uncharacterized protein [Source:UniProtKB/TrEMBL;Acc:F1S3J3]	gene	Name match	0	5.57767	4.20486	1.37281	2.58975
ENSSSCG00000002452	7	120780129	120811703	-	0.0706024	ENSSSCG00000002452	ENSSSCG00000002452	No description	gene	Name match	0	9.30379	6.27309	3.0307	8.17206
ENSSSCG00000004081	1	16065606	16221209	-	646.63	ENSSSCG00000004081	ENSSSCG00000004081	Uncharacterized protein [Source:UniProtKB/TrEMBL;Acc:F1S7X1]	gene	Name match	0	4.97273	2.81895	2.15378	4.44992
ENSSSCG00000004328	1	64591453	64665119	-	0.0043522795	ENSSSCG00000004328	ENSSSCG00000004328	Uncharacterized protein [Source:UniProtKB/TrEMBL;Acc:F1RY22]	gene	Name match	0	6.50398	7.84028	-1.3363	0.396036	-2.52502
ENSSSCG00000004579	1	123412643	123414108	-	424.477	ENSSSCG00000004579	ENSSSCG00000004579	Uncharacterized protein [Source:UniProtKB/TrEMBL;Acc:F1S072]	gene	Name match	0	7.09745	5.07308	2.02437	4.06814
ENSSSCG00000004705	1	142764559	142773289	-	832.193	ENSSSCG00000004705	ENSSSCG00000004705	No description	gene	Name match	0	2.05407	4.80398	-2.74991	0.14866	-6.72674
ENSSSCG00000004963	1	184592890	184629728	-	61.8006	ENSSSCG00000004963	ENSSSCG00000004963	Uncharacterized protein [Source:UniProtKB/TrEMBL;Acc:F1SIU2]	gene	Name match	0	4.78179	6.65797	-1.87617	0.272405	-3.671
ENSSSCG00000006711	4	111112801	111134628	-	3741.54	ENSSSCG00000006711	ENSSSCG00000006711	No description	gene	Name match	0	3.23908	-0.38842	3.6275	12.3591
ENSSSCG00000008068	3	42962864	43014160	-	0.0024684418	ENSSSCG00000008068	ENSSSCG00000008068	No description	gene	Name match	0	5.00436	2.90985	2.0945	4.27079
ENSSSCG00000008120	3	48458585	48487147	+	0.045748416	ENSSSCG00000008120	ENSSSCG00000008120	Uncharacterized protein [Source:UniProtKB/TrEMBL;Acc:F1SU52]	gene	Name match	0	4.94868	3.51736	1.43132	2.69694
ENSSSCG00000009215	8	140152539	140167776	+	597.123	ENSSSCG00000009215	ENSSSCG00000009215	No description	gene	Name match	0	4.7854	2.45726	2.32814	5.02159
ENSSSCG00000009432	15	147864482	147920509	+	0.001964933	ENSSSCG00000009432	ENSSSCG00000009432	No description	gene	Name match	0	1.92605	-2.59706	4.52312	22.9929
ENSSSCG00000009633	14	7785333	7817139	-	0.0028040756	ENSSSCG00000009633	ENSSSCG00000009633	Uncharacterized protein [Source:UniProtKB/TrEMBL;Acc:F1RM98]	gene	Name match	0	2.13056	-2.26373	4.39429	21.0288
ENSSSCG00000010485	14	115760550	115763113	+	0.01185265	ENSSSCG00000010485	ENSSSCG00000010485	No description	gene	Name match	0	0.754528	-2.64773	3.40226	10.5726
ENSSSCG00000011553	13	73169735	73201215	+	0.012460916	ENSSSCG00000011553	ENSSSCG00000011553	Uncharacterized protein [Source:UniProtKB/TrEMBL;Acc:F1SQE5]	gene	Name match	0	3.53981	1.28124	2.25857	4.78517
ENSSSCG00000012006	13	189414690	189546760	+	3.6206	ENSSSCG00000012006	ENSSSCG00000012006	No description	gene	Name match	0	2.00971	-2.64773	4.65744	25.2365
ENSSSCG00000012158	X	16597208	16607214	-	0.033826508	ENSSSCG00000012158	ENSSSCG00000012158	No description	gene	Name match	0	1.93222	-1.9304	3.86262	14.5467
ENSSSCG00000014909	9	21887327	22005568	-	0.027807005	ENSSSCG00000014909	ENSSSCG00000014909	Uncharacterized protein [Source:UniProtKB/TrEMBL;Acc:F1STT2]	gene	Name match	0	0.926053	-2.64773	3.57378	11.9074
ENSSSCG00000015329	9	81814455	81815867	-	904.942	ENSSSCG00000015329	ENSSSCG00000015329	Uncharacterized protein [Source:UniProtKB/TrEMBL;Acc:F1SFA4]	gene	Name match	0	4.37156	2.30855	2.06301	4.17857
ENSSSCG00000015586	9	143198041	143281088	+	0.0020042423	ENSSSCG00000015586	ENSSSCG00000015586	Uncharacterized protein [Source:UniProtKB/TrEMBL;Acc:F1S2Y0]	gene	Name match	0	4.8473	2.89881	1.94849	3.8597
ENSSSCG00000016487	18	8049183	8132978	+	0.035379373	ENSSSCG00000016487	ENSSSCG00000016487	Uncharacterized protein [Source:UniProtKB/TrEMBL;Acc:F1SRS3]	gene	Name match	0	-1.67257	1.93042	-3.60299	0.0822986	-12.1509
ENSSSCG00000016781	16	4222391	4259625	+	0.01962838	ENSSSCG00000016781	ENSSSCG00000016781	No description	gene	Name match	0	3.50354	1.46566	2.03787	4.1064
ENSSSCG00000016795	16	6829357	6866653	+	0.0015597674	ENSSSCG00000016795	ENSSSCG00000016795	Uncharacterized protein [Source:UniProtKB/TrEMBL;Acc:F1SRL9]	gene	Name match	0	8.34351	7.24652	1.09699	2.13908
ENSSSCG00000016898	16	36127284	36204033	-	0.004120842	ENSSSCG00000016898	ENSSSCG00000016898	Uncharacterized protein [Source:UniProtKB/TrEMBL;Acc:F1SLP8]	gene	Name match	0	3.72435	1.36718	2.35717	5.12366
ENSSSCG00000017085	16	77915955	77918717	+	0.005368684	ENSSSCG00000017085	ENSSSCG00000017085	No description	gene	Name match	0	1.13681	-2.64773	3.78454	13.7804
ENSSSCG00000017086	16	77897396	77906717	+	46.6348	ENSSSCG00000017086	ENSSSCG00000017086	No description	gene	Name match	0	2.39016	-2.64773	5.03789	32.8516
ENSSSCG00000017401	12	20501211	20557132	-	0.0446941	ENSSSCG00000017401	ENSSSCG00000017401	Uncharacterized protein [Source:UniProtKB/TrEMBL;Acc:F1S1D6]	gene	Name match	0	4.19876	2.79497	1.40379	2.64597
ENSSSCG00000017712	12	41351700	41438001	-	397.622	ENSSSCG00000017712	ENSSSCG00000017712	No description	gene	Name match	0	7.32118	5.77714	1.54405	2.91612
ENSSSCG00000020808	3	17095561	17105542	-	97.5413	ENSSSCG00000020808	ENSSSCG00000020808	No description	gene	Name match	0	6.07092	7.82521	-1.75429	0.29642	-3.3736
ENSSSCG00000020837	6	45173190	45196492	-	0.0089376345	ENSSSCG00000020837	ENSSSCG00000020837	No description	gene	Name match	0	3.53193	1.3222	2.20973	4.62588
ENSSSCG00000021254	14	86814321	86825802	-	0.019071024	ENSSSCG00000021254	ENSSSCG00000021254	No description	gene	Name match	0	2.76381	-0.193432	2.95724	7.76639
ENSSSCG00000022342/ LOC100514912	9	28754240	28756842	-	3.6206	ENSSSCG00000022342	ENSSSCG00000022342	Elongation factor 1-alpha [Source:UniProtKB/TrEMBL;Acc:F1STN7]	gene	Name match	0	-2.25156	2.11849	-4.37004	0.04836	-20.6782
ENSSSCG00000022659	12	36561026	36603058	-	0.015919724	ENSSSCG00000022659	ENSSSCG00000022659	No description	gene	Name match	0	7.02478	5.91244	1.11235	2.16197
ENSSSCG00000022796	1	239697128	239699690	+	0.049354974	ENSSSCG00000022796	ENSSSCG00000022796	No description	gene	Name match	0	0.13161	-2.64773	2.77934	6.86539
ENSSSCG00000022839	6	71470880	71540224	-	0.010537473	ENSSSCG00000022839	ENSSSCG00000022839	No description	gene	Name match	0	1.78556	4.39257	-2.607	0.16414	-6.09238
ENSSSCG00000022885	13	84797006	84845397	+	0.038745545	ENSSSCG00000022885	ENSSSCG00000022885	No description	gene	Name match	0	2.04874	-0.193432	2.24217	4.7311
ENSSSCG00000023298	17	39335394	39342318	-	0.043465935	ENSSSCG00000023298	ENSSSCG00000023298	Uncharacterized protein [Source:UniProtKB/TrEMBL;Acc:F1S862]	gene	Name match	0	2.40935	-1.43909	3.84844	14.4044
ENSSSCG00000023305	6	26369804	26370746	-	0.030517248	ENSSSCG00000023305	ENSSSCG00000023305	No description	gene	Name match	0	-1.72323	1.66319	-3.38642	0.0956281	-10.4572
ENSSSCG00000023715	5	32134175	32173480	-	0.007410935	ENSSSCG00000023715	ENSSSCG00000023715	No description	gene	Name match	0	5.4347	3.97906	1.45563	2.74277
ENSSSCG00000023819	Y	864998	868128	-	17.3894	ENSSSCG00000023819	ENSSSCG00000023819	No description	gene	Name match	0	2.76022	-2.64773	5.40795	42.4576
ENSSSCG00000024057	1	130700419	130733250	+	0.014981006	ENSSSCG00000024057	ENSSSCG00000024057	No description	gene	Name match	0	1.37053	-2.59706	3.96759	15.6446
ENSSSCG00000024125	11	18284859	18292470	+	0.010312235	ENSSSCG00000024125	ENSSSCG00000024125	No description	gene	Name match	0	5.29815	6.89814	-1.59999	0.329879	-3.03141
ENSSSCG00000024292	3	43030018	43051427	-	0.028604902	ENSSSCG00000024292	ENSSSCG00000024292	No description	gene	Name match	0	6.22775	5.17164	1.05611	2.07931
ENSSSCG00000024754	18	43984662	44336212	-	0.023340961	ENSSSCG00000024754	ENSSSCG00000024754	No description	gene	Name match	0	0.986243	-2.64773	3.63398	12.4147
ENSSSCG00000025202	13	49993011	49999769	-	0.01643165	ENSSSCG00000025202	ENSSSCG00000025202	No description	gene	Name match	0	4.17807	5.99858	-1.82051	0.28312	-3.53207
ENSSSCG00000025689	3	139857805	139865866	-	0.017999534	ENSSSCG00000025689	ENSSSCG00000025689	No description	gene	Name match	0	1.58789	-2.06874	3.65663	12.6112
ENSSSCG00000025704	4	119302443	119319206	+	646.898	ENSSSCG00000025704	ENSSSCG00000025704	No description	gene	Name match	0	4.11935	1.34774	2.77161	6.82871
ENSSSCG00000025724	1	154562565	154575916	-	0.035379373	ENSSSCG00000025724	ENSSSCG00000025724	No description	gene	Name match	0	1.43474	-2.26373	3.69847	12.9823
ENSSSCG00000025792	8	59002304	59009753	-	0.027951635	ENSSSCG00000025792	ENSSSCG00000025792	No description	gene	Name match	0	3.87857	5.4229	-1.54432	0.342857	-2.91667
ENSSSCG00000026125	13	126312487	126312831	-	0.014639627	ENSSSCG00000026125	ENSSSCG00000026125	No description	gene	Name match	0	1.43474	-2.59706	4.03181	16.3567
ENSSSCG00000026577	18	5439493	5442711	-	0.011856367	ENSSSCG00000026577	ENSSSCG00000026577	No description	gene	Name match	0	2.42419	4.49753	-2.07334	0.237609	-4.20859
ENSSSCG00000026815	1	169149958	169166152	+	0.042497292	ENSSSCG00000026815	ENSSSCG00000026815	No description	gene	Name match	0	0.806568	-2.64773	3.4543	10.9609
ENSSSCG00000026857	6	89021503	89024892	+	0.008054034	ENSSSCG00000026857	ENSSSCG00000026857	No description	gene	Name match	0	4.79022	3.30607	1.48415	2.79752
ENSSSCG00000026996/ LOC100627251	11	70152454	70201530	+	0.02653907	ENSSSCG00000026996	ENSSSCG00000026996	No description	gene	Name match	0	-1.05657	3.44505	-4.50161	0.0441448	-22.6527
ENSSSCG00000027164	13	87042528	87070260	+	0.01036263	ENSSSCG00000027164	ENSSSCG00000027164	No description	gene	Name match	0	6.58842	5.22534	1.36308	2.57234
ENSSSCG00000027170	15	124957798	124963068	+	2368.29	ENSSSCG00000027170	ENSSSCG00000027170	No description	gene	Name match	0	3.60664	-0.4068	4.01344	16.1498
ENSSSCG00000027447	5	47183562	47366161	+	0.452251	ENSSSCG00000027447	ENSSSCG00000027447	No description	gene	Name match	0	3.81045	-0.967408	4.77786	27.4334
ENSSSCG00000027546	4	143342627	143350463	+	0.021197041	ENSSSCG00000027546	ENSSSCG00000027546	Uncharacterized protein [Source:UniProtKB/TrEMBL;Acc:F1SEW7]	gene	Name match	0	0.313885	3.15639	-2.8425	0.139419	-7.17264
ENSSSCG00000027687	6	64376599	64395795	+	0.029776365	ENSSSCG00000027687	ENSSSCG00000027687	No description	gene	Name match	0	5.05514	3.10403	1.95111	3.86673
ENSSSCG00000029066	10	75367603	75370787	+	610.745	ENSSSCG00000029066	ENSSSCG00000029066	Isopentyl-diphosphate delta isomerase [Source:UniProtKB/TrEMBL;Acc:Q6EEJ4]	gene	Name match	0	6.55568	4.3248	2.23088	4.69419
ENSSSCG00000029703	1	202398706	202405718	+	0.027794866	ENSSSCG00000029703	ENSSSCG00000029703	No description	gene	Name match	0	3.52051	1.66487	1.85564	3.61912
ENSSSCG00000029707	1	76359805	76360778	-	1080.15	ENSSSCG00000029707	ENSSSCG00000029707	No description	gene	Name match	0	2.78771	-1.68474	4.47245	22.1994
ENSSSCG00000029764	X	14261651	14288071	+	0.009363982	ENSSSCG00000029764	ENSSSCG00000029764	No description	gene	Name match	0	3.85866	5.90729	-2.04863	0.241714	-4.13713
ENSSSCG00000029857	X	21570974	21590470	+	0.010310476	ENSSSCG00000029857	ENSSSCG00000029857	Uncharacterized protein [Source:UniProtKB/TrEMBL;Acc:F1SPY4]	gene	Name match	0	6.24321	7.61458	-1.37137	0.386525	-2.58715
ENSSSCG00000030611	5	62800573	62801511	+	79.818	ENSSSCG00000030611	ENSSSCG00000030611	Heme binding protein [Source:UniProtKB/TrEMBL;Acc:Q6QAR4]	gene	Name match	0	6.82392	5.40079	1.42313	2.68167
ENTP1_PIG	14	116930091	117022881	+	0.018426182	null				Not found	0	4.18613	5.74949	-1.56335	0.338363	-2.9554
EPB41L4A	2	121986204	122087421	-	0.022423698	EPB41L4A	ENSSSCG00000014209	Uncharacterized protein [Source:UniProtKB/TrEMBL;Acc:F1RLG2]	gene	Name match	0	3.06319	-0.489755	3.55295	11.7367
EPOR_PIG	2	70426996	70432219	-	0.0011910473	null				Not found	0	3.03592	-0.439087	3.47501	11.1194
ESF1	17	25098770	25160124	-	0.043452013	ESF1	ENSSSCG00000007077	ESF1, nucleolar pre-rRNA processing protein, homolog (S. cerevisiae) [Source:HGNC Symbol;Acc:15898]	gene	Name match	0	5.81187	7.04304	-1.23117	0.425973	-2.34757
EVI2B	12	45381283	45387344	+	0.046972267	EVI2B	ENSSSCG00000017750	Uncharacterized protein [Source:UniProtKB/TrEMBL;Acc:F1RJ56]	gene	Name match	0	0.818743	-2.64773	3.46648	11.0538
EXOSC5	6	45166375	45170060	-	0.023919208	EXOSC5	ENSSSCG00000003015	Uncharacterized protein [Source:UniProtKB/TrEMBL;Acc:F1RH84]	gene	Name match	0	1.18123	3.74761	-2.56638	0.168827	-5.92321
F2RL1	2	87348805	87363748	+	18.4917	F2RL1	ENSSSCG00000014091	Uncharacterized protein [Source:UniProtKB/TrEMBL;Acc:F1S2H4]	gene	Name match	0	6.0148	3.55625	2.45855	5.49663
FADS1	2	9247472	9260845	-	460.71	FADS1	ENSSSCG00000024015	fatty acid desaturase 1 [Source:RefSeq peptide;Acc:NP_001106512]	gene	Name match	0	6.42908	3.8467	2.58238	5.98929
FAM136A	3	75462088	75468524	+	0.0053995065	FAM136A	ENSSSCG00000026446	Uncharacterized protein [Source:UniProtKB/TrEMBL;Acc:F1SLD2]	gene	Name match	0	4.74192	6.31187	-1.56995	0.33682	-2.96894
FAM13B	2	145684311	145752899	-	0.041565914	FAM13B	ENSSSCG00000029125	family with sequence similarity 13, member B [Source:HGNC Symbol;Acc:1335]	gene	Name match	0	2.1337	4.07111	-1.93741	0.261084	-3.83018
FAM169A	2	85441368	85513476	-	0.014627683	FAM169A	ENSSSCG00000014076	Uncharacterized protein [Source:UniProtKB/TrEMBL;Acc:F1S2J5]	gene	Name match	0	4.36521	2.38495	1.98025	3.94562
FAM174A	2	110536479	110563848	+	0.018649047	FAM174A	ENSSSCG00000014179	Uncharacterized protein [Source:UniProtKB/TrEMBL;Acc:F1RN64]	gene	Name match	0	2.9513	0.473235	2.47807	5.57151
FAN1	1	159864765	159907060	-	0.0042184177	FAN1	ENSSSCG00000004845	Uncharacterized protein [Source:UniProtKB/TrEMBL;Acc:F1SNR1]	gene	Name match	0	1.97552	4.46352	-2.488	0.178253	-5.61001
FAR1	2	48831842	48904569	-	0.040252935	FAR1	ENSSSCG00000021170	Fatty acyl-CoA reductase 1 [Source:UniProtKB/TrEMBL;Acc:G8ENM4]	gene	Name match	0	4.94708	3.67138	1.27569	2.42115
FBL	6	44160341	44172057	+	0.014905572	FBL	ENSSSCG00000030510	fibrillarin [Source:HGNC Symbol;Acc:3599]	gene	Name match	0	4.36461	6.03285	-1.66825	0.314636	-3.17828
FCHSD2	9	8130490	8362269	-	0.006295904	FCHSD2	ENSSSCG00000014820	Uncharacterized protein [Source:UniProtKB/TrEMBL;Acc:F1SUU8]	gene	Name match	0	-1.53422	2.29175	-3.82597	0.070513	-14.1818
FEM1C	2	124628609	124644415	-	0.008730079	FEM1C	ENSSSCG00000014217	Uncharacterized protein [Source:UniProtKB/TrEMBL;Acc:F1RLE6]	gene	Name match	0	4.81921	2.7669	2.05231	4.14769
FERMT1	17	16443895	16503976	-	0.004487617	FERMT1	ENSSSCG00000007052	fermitin family member 1 [Source:HGNC Symbol;Acc:15889]	gene	Name match	0	4.88876	2.90884	1.97991	3.9447
FLNB	13	43872847	43896031	-	0.039996773	FLNB	ENSSSCG00000011471	filamin B, beta [Source:HGNC Symbol;Acc:3755]	gene	Name match	0	6.71282	5.88015	0.832672	1.78098
FLOT1_PIG	7	26974266	26987128	-	0.047585085	null				Not found	0	2.80573	-0.331778	3.13751	8.80004
FLOT2	12	47153569	47162508	+	0.00585448	FLOT2	ENSSSCG00000017777	Uncharacterized protein [Source:UniProtKB/TrEMBL;Acc:F1RNA6]	gene	Name match	0	2.28854	-1.38842	3.67696	12.7901
FNIP1	2	139275929	139352641	-	0.019750876	FNIP1	ENSSSCG00000014269	Uncharacterized protein [Source:UniProtKB/TrEMBL;Acc:F1RJW1]	gene	Name match	0	5.67332	4.52775	1.14558	2.21235
FOS_PIG	7	104293657	104297121	+	7.27048e-07	null				Not found	0	1.52988	6.77354	-5.24366	0.0263937	-37.8878
FOXN2	3	98079346	98147165	+	0.047794975	FOXN2	ENSSSCG00000029593	Uncharacterized protein [Source:UniProtKB/TrEMBL;Acc:F1SQI4]	gene	Name match	0	3.03636	4.83111	-1.79475	0.288221	-3.46956
FOXRED2	5	8916285	8937001	+	0.0057083303	FOXRED2	ENSSSCG00000000142	FAD-dependent oxidoreductase domain containing 2 [Source:HGNC Symbol;Acc:26264]	gene	Name match	0	4.20646	1.59486	2.6116	6.11182
FRMD6	1	201656074	201698202	+	0.014389138	FRMD6	ENSSSCG00000005027	Uncharacterized protein [Source:UniProtKB/TrEMBL;Acc:F1SFF5]	gene	Name match	0	4.39262	2.79251	1.60011	3.03167
FXYD4	14	66464897	66469117	+	0.0021999865	FXYD4	ENSSSCG00000010202	Uncharacterized protein [Source:UniProtKB/TrEMBL;Acc:F1RG18]	gene	Name match	0	7.97248	6.46247	1.51001	2.84812
FZD6	4	36662278	36697154	-	0.015375033	FZD6	ENSSSCG00000006052	Uncharacterized protein [Source:UniProtKB/TrEMBL;Acc:F1S0R5]	gene	Name match	0	3.43759	1.30456	2.13303	4.38638
GALNT11	18	5599808	5634480	-	0.028218543	GALNT11	ENSSSCG00000016430	Uncharacterized protein [Source:UniProtKB/TrEMBL;Acc:F1SSN4]	gene	Name match	0	8.00568	7.06611	0.939574	1.91796
GALNT7	14	17867673	17927120	-	0.0034272033	GALNT7	ENSSSCG00000009705	Uncharacterized protein [Source:UniProtKB/TrEMBL;Acc:F1RIZ9]	gene	Name match	0	5.96704	4.48296	1.48408	2.79738
GAR1	8	120483790	120496430	-	34.2975	GAR1	ENSSSCG00000020907	Uncharacterized protein [Source:UniProtKB/TrEMBL;Acc:F1S134]	gene	Name match	0	6.60722	8.4775	-1.87028	0.273521	-3.65603
GCNT1	1	256219662	256220948	+	0.034478266	GCNT1	ENSSSCG00000005277	Uncharacterized protein [Source:UniProtKB/TrEMBL;Acc:F1SIN0]	gene	Name match	0	3.18651	1.1399	2.0466	4.13132
GCNT3	1	124393189	124394511	-	4261.7	GCNT3	ENSSSCG00000004584	glucosaminyl (N-acetyl) transferase 3, mucin type [Source:HGNC Symbol;Acc:4205]	gene	Name match	0	3.62469	-1.27728	4.90197	29.8979
GDPD2	X	63646167	63656062	+	0.0038748942	GDPD2	ENSSSCG00000012376	Uncharacterized protein [Source:UniProtKB/TrEMBL;Acc:F1RTL2]	gene	Name match	0	5.6048	4.22907	1.37574	2.59501
GFAT1	3	76459924	76509989	+	0.04946481	GFAT1	ENSSSCG00000008339	glucosamine--fructose-6-phosphate aminotransferase [Source:RefSeq peptide;Acc:NP_001181908]	gene	Name match	0	4.29983	2.4021	1.89773	3.72626
GGA2	10	135679	165446	+	77.7858	GGA2	ENSSSCG00000010798	golgi-associated, gamma adaptin ear containing, ARF binding protein 2 [Source:HGNC Symbol;Acc:16064]	gene	Name match	0	6.80518	5.01899	1.78619	3.44903
GGLO_PIG	14	12480095	12512560	+	0.03313155	null				Not found	0	6.56526	3.96884	2.59641	6.0478
GINS4	17	12084301	12096480	-	0.049354974	GINS4	ENSSSCG00000023452	GINS complex subunit 4 (Sld5 homolog) [Source:HGNC Symbol;Acc:28226]	gene	Name match	0	3.81117	5.28942	-1.47825	0.358925	-2.7861
GIPC2	6	125311965	125459978	-	0.04946481	GIPC2	ENSSSCG00000027873	Uncharacterized protein [Source:UniProtKB/TrEMBL;Acc:F1S9S7]	gene	Name match	0	5.61776	4.2652	1.35256	2.55365
GLDC	1	241060724	241084165	+	0.0013691579	GLDC	ENSSSCG00000005199	Uncharacterized protein [Source:UniProtKB/TrEMBL;Acc:F1SMN8]	gene	Name match	0	7.4633	6.23189	1.23141	2.34796
GLO1	7	39241001	39271606	-	8.23679	GLO1	ENSSSCG00000027778	Uncharacterized protein [Source:UniProtKB/TrEMBL;Acc:F1RVR3]	gene	Name match	0	6.29232	4.5415	1.75082	3.3655
GLRX5	7	124001624	124012134	+	0.012059146	GLRX5	ENSSSCG00000002496	Uncharacterized protein [Source:UniProtKB/TrEMBL;Acc:F1SAR5]	gene	Name match	0	4.846	6.66337	-1.81736	0.283739	-3.52436
GM2A	16	77974389	77987649	-	4.33064e-15	GM2A	ENSSSCG00000017087	GM2 ganglioside activator [Source:HGNC Symbol;Acc:4367]	gene	Name match	0	10.9862	8.17449	2.81169	7.02104
GNL3	13	38020617	38028557	+	172.169	GNL3	ENSSSCG00000011449	Uncharacterized protein [Source:UniProtKB/TrEMBL;Acc:F1SH97]	gene	Name match	0	4.37058	6.27032	-1.89975	0.267991	-3.73147
GOPC	1	49584183	49627902	+	0.0092370985	GOPC	ENSSSCG00000004253	Uncharacterized protein [Source:UniProtKB/TrEMBL;Acc:F1SF21]	gene	Name match	0	1.95709	4.21287	-2.25578	0.209384	-4.77591
GORASP1	13	26042858	26057279	-	0.0025549908	GORASP1	ENSSSCG00000021169	Uncharacterized protein [Source:UniProtKB/TrEMBL;Acc:F1SJS5]	gene	Name match	0	4.58186	2.75569	1.82616	3.54593
GPD1L	13	20616343	20666658	-	0.033631742	GPD1L	ENSSSCG00000021977	glycerol-3-phosphate dehydrogenase 1-like [Source:HGNC Symbol;Acc:28956]	gene	Name match	0	9.62192	10.7405	-1.11854	0.460561	-2.17127
GPR64	X	16578875	16597106	-	783.832	GPR64	ENSSSCG00000029756	Uncharacterized protein [Source:UniProtKB/TrEMBL;Acc:F1SQN9]	gene	Name match	0	2.30508	-2.64773	4.95282	30.9704
GRB10	9	150279687	150423905	-	0.030073617	GRB10	ENSSSCG00000015631	Growth factor receptor-bound protein 10 [Source:UniProtKB/Swiss-Prot;Acc:B5KFD7]	gene	Name match	0	2.5239	-0.300742	2.82464	7.08439
GRB10_PIG	9	150266276	150423905	-	660.773	null				Not found	0	2.64816	-1.68474	4.3329	20.1527
GRM8	18	22609817	23086523	+	0.010310476	GRM8	ENSSSCG00000022865	Glutamate receptor metabotropic 8 [Source:UniProtKB/TrEMBL;Acc:F4YE29]	gene	Name match	0	0.680397	-2.64773	3.32813	10.0431
GSTP1_PIG	2	3618668	3620934	-	263.999	null				Not found	0	7.54591	5.20329	2.34262	5.07223
GTR2_PIG	13	118535743	118557269	-	0.00020656	null				Not found	0	4.90541	-0.119301	5.02471	32.5529
HCCS	X	8445008	8456475	+	0.049354974	HCCS	ENSSSCG00000012111	Uncharacterized protein [Source:UniProtKB/TrEMBL;Acc:F1SG16]	gene	Name match	0	4.51006	5.9421	-1.43204	0.370606	-2.69829
HEBP2	1	29141326	29149072	-	0.0071995943	HEBP2	ENSSSCG00000004150	Uncharacterized protein [Source:UniProtKB/TrEMBL;Acc:F1S6A9]	gene	Name match	0	2.20469	-1.9304	4.13509	17.5706
HEXB_PIG	2	85331775	85372032	+	0.452251	null				Not found	0	7.02378	4.66084	2.36294	5.14416
HIBADH	18	49630501	49645365	-	0.009377739	HIBADH	ENSSSCG00000029589	3-hydroxyisobutyrate dehydrogenase [Source:HGNC Symbol;Acc:4907]	gene	Name match	0	5.62329	4.24646	1.37683	2.59696
HMDH_PIG	2	85967321	85990095	+	0.000225529	null				Not found	0	7.05465	4.18677	2.86788	7.2999
HMGB2_PIG	14	17859679	17862757	+	95.5571	null				Not found	0	5.90762	7.6855	-1.77788	0.291612	-3.42921
HMGCS1	16	29433805	29454088	+	18.4917	HMGCS1	ENSSSCG00000016872	Uncharacterized protein [Source:UniProtKB/TrEMBL;Acc:F1SMG8]	gene	Name match	0	8.98722	5.85742	3.1298	8.75312
HNRNPA2B1	15	59810834	59811895	+	0.0026686469	HNRNPA2B1	ENSSSCG00000015836	Uncharacterized protein [Source:UniProtKB/TrEMBL;Acc:F1RX74]	gene	Name match	0	8.35416	9.71577	-1.36161	0.389148	-2.56972
HNRNPM	2	71180163	71225240	-	0.018124139	HNRNPM	ENSSSCG00000013602	Uncharacterized protein [Source:UniProtKB/TrEMBL;Acc:F1SA50]	gene	Name match	0	7.1796	8.54431	-1.36471	0.388312	-2.57525
HNRNPU	10	19918406	19928777	+	0.042746443	HNRNPU	ENSSSCG00000010877	Uncharacterized protein [Source:UniProtKB/TrEMBL;Acc:F1S8L9]	gene	Name match	0	7.31925	8.37153	-1.05228	0.482204	-2.07381
HSD17B12	2	20061566	20211950	-	0.037764154	HSD17B12	ENSSSCG00000021739	Hydroxysteroid (17-beta) dehydrogenase 12 [Source:UniProtKB/TrEMBL;Acc:D0G6Y0]	gene	Name match	0	5.25813	4.09702	1.1611	2.23628
HSD17B14	6	49872779	49891496	-	1539.83	HSD17B14	ENSSSCG00000003138	Uncharacterized protein [Source:UniProtKB/TrEMBL;Acc:F1RL81]	gene	Name match	0	4.94105	1.56652	3.37454	10.3714
HSPA12A	14	138170746	138246086	-	0.826816	HSPA12A	ENSSSCG00000010662	Uncharacterized protein [Source:UniProtKB/TrEMBL;Acc:F1S4S5]	gene	Name match	0	4.2591	-0.943945	5.20305	36.8361
HSPB3	16	35788147	35788802	+	0.023340961	HSPB3	ENSSSCG00000016896	Uncharacterized protein [Source:UniProtKB/TrEMBL;Acc:F1SLQ0]	gene	Name match	0	0.971887	-2.64773	3.61962	12.2918
HTATIP2	2	41963507	41980418	+	0.0031628732	HTATIP2	ENSSSCG00000013349	Uncharacterized protein [Source:UniProtKB/TrEMBL;Acc:F1SFY5]	gene	Name match	0	4.29435	1.95825	2.3361	5.04935
ICAL_PIG	2	106934106	107128389	+	0.0021470373	null				Not found	0	3.91527	0.314422	3.60085	12.1329
ILEU_PIG	7	1784203	1792444	-	0.0482519	null				Not found	0	0.336257	-2.64773	2.98399	7.91171
INPP1	15	106358846	106371914	+	95.5571	INPP1	ENSSSCG00000016050	Uncharacterized protein [Source:UniProtKB/TrEMBL;Acc:F1SN51]	gene	Name match	0	-2.25156	2.21553	-4.46709	0.045214	-22.1171
INPP5A	14	152709505	152869113	+	0.01475188	INPP5A	ENSSSCG00000010765	Uncharacterized protein [Source:UniProtKB/TrEMBL;Acc:F1SDI6]	gene	Name match	0	1.15805	-2.64773	3.80578	13.9848
INVO_PIG	4	105592346	105593438	-	0.0027927798	null				Not found	0	0.935576	-2.64773	3.58331	11.9862
IQGAP1	7	58161247	58190445	-	0.0063630273	IQGAP1	ENSSSCG00000001814	Uncharacterized protein [Source:UniProtKB/TrEMBL;Acc:F1RMJ4]	gene	Name match	0	6.67727	5.45388	1.22339	2.33495
ISLR	7	63967911	63971166	-	0.00769088	ISLR	ENSSSCG00000001910	Uncharacterized protein [Source:UniProtKB/TrEMBL;Acc:F1SIE1]	gene	Name match	0	1.19057	-2.64773	3.8383	14.3035
ITB1_PIG	10	61450700	61502941	-	0.016734313	null				Not found	0	7.67913	6.68653	0.992594	1.98976
ITPKB	10	16758185	16763268	-	0.019426228	ITPKB	ENSSSCG00000022888	inositol-trisphosphate 3-kinase B [Source:HGNC Symbol;Acc:6179]	gene	Name match	0	-1.86755	2.21352	-4.08108	0.0590845	-16.9249
ITPKC	6	44627745	44646736	+	0.034478266	ITPKC	ENSSSCG00000003000	Uncharacterized protein [Source:UniProtKB/TrEMBL;Acc:F1RHA5]	gene	Name match	0	6.05132	7.19742	-1.14609	0.451847	-2.21314
JAK3	2	59475336	59495969	+	0.014705216	JAK3	ENSSSCG00000013888	Tyrosine-protein kinase [Source:UniProtKB/TrEMBL;Acc:F1S936]	gene	Name match	0	1.25455	-2.64773	3.90229	14.9522
KATNB1	6	17713584	17719176	+	0.035584517	KATNB1	ENSSSCG00000002813	Uncharacterized protein [Source:UniProtKB/TrEMBL;Acc:F1RF38]	gene	Name match	0	-0.352781	2.72274	-3.07553	0.118625	-8.42996
KBTBD3	9	39910815	39920566	-	0.024571892	KBTBD3	ENSSSCG00000014999	Uncharacterized protein [Source:UniProtKB/TrEMBL;Acc:F1SV34]	gene	Name match	0	2.94952	-0.312917	3.26243	9.59599
KDSR	1	175775174	175816627	+	0.0033273303	KDSR	ENSSSCG00000025744	Uncharacterized protein [Source:UniProtKB/TrEMBL;Acc:F1SMW5]	gene	Name match	0	3.68252	0.766905	2.91562	7.5455
KIAA0907	4	102841241	102859721	+	0.022423698	KIAA0907	ENSSSCG00000006504	Uncharacterized protein [Source:UniProtKB/TrEMBL;Acc:F1RLM7]	gene	Name match	0	3.55236	5.32694	-1.77458	0.292279	-3.42139
KIAA0913	14	82638231	82654920	+	0.035340905	KIAA0913	ENSSSCG00000010309	Uncharacterized protein [Source:UniProtKB/TrEMBL;Acc:F1SU41]	gene	Name match	0	4.12334	2.62364	1.4997	2.82784
KIAA1109	8	108893587	109077862	-	473.506	KIAA1109	ENSSSCG00000009090	KIAA1109 [Source:HGNC Symbol;Acc:26953]	gene	Name match	0	6.80939	4.95686	1.85253	3.61133
KIAA1217	10	56159320	56317981	-	0.0026686469	KIAA1217	ENSSSCG00000011075	Uncharacterized protein [Source:UniProtKB/TrEMBL;Acc:F1RVJ2]	gene	Name match	0	2.40784	-1.73541	4.14325	17.6703
KIAA1239	8	30403815	30422795	+	0.044253636	KIAA1239	ENSSSCG00000008770	Uncharacterized protein [Source:UniProtKB/TrEMBL;Acc:F1S4L9]	gene	Name match	0	0.545601	-2.64773	3.19333	9.14722
KIAA1407	13	155530844	155568016	+	0.004469866	KIAA1407	ENSSSCG00000011913	Uncharacterized protein [Source:UniProtKB/TrEMBL;Acc:F1SP97]	gene	Name match	0	1.59272	-2.59706	4.18978	18.2495
KIF21A	5	73380996	73586157	-	0.027807005	KIF21A	ENSSSCG00000000779	Uncharacterized protein [Source:UniProtKB/TrEMBL;Acc:F1SHQ2]	gene	Name match	0	4.67323	6.22916	-1.55592	0.34011	-2.94022
KL	11	9345005	9392395	+	0.030202689	KL	ENSSSCG00000009347	Uncharacterized protein [Source:UniProtKB/TrEMBL;Acc:F1RSR6]	gene	Name match	0	4.56756	5.89627	-1.32871	0.398124	-2.51178
KLHL5	8	31861892	31953968	+	0.0017197945	KLHL5	ENSSSCG00000008787	Uncharacterized protein [Source:UniProtKB/TrEMBL;Acc:F1S4I8]	gene	Name match	0	3.84208	0.691685	3.1504	8.87901
LAMB1	9	118439608	118514521	-	31.7811	LAMB1	ENSSSCG00000015444	laminin, beta 1 [Source:HGNC Symbol;Acc:6486]	gene	Name match	0	5.64486	3.54104	2.10382	4.29845
LAMC1	9	136548464	136668804	-	0.00646774	LAMC1	ENSSSCG00000015555	Uncharacterized protein [Source:UniProtKB/TrEMBL;Acc:F1S663]	gene	Name match	0	6.37514	3.25657	3.11858	8.6853
LCOR	14	118037121	118045440	+	0.03501864	LCOR	ENSSSCG00000010511	Uncharacterized protein [Source:UniProtKB/TrEMBL;Acc:F1S8Z1]	gene	Name match	0	2.73667	0.358352	2.37832	5.19929
LDHB	5	55086948	55108253	+	204.998	LDHB	ENSSSCG00000000576	L-lactate dehydrogenase [Source:UniProtKB/TrEMBL;Acc:F1SR05]	gene	Name match	0	7.76199	9.65657	-1.89458	0.268952	-3.71814
LDHB_PIG	2	12622307	12623588	+	137.973	null				Not found	0	8.25985	10.1117	-1.85184	0.277038	-3.60961
LDLRAP1	6	76601345	76625150	+	0.021841597	LDLRAP1	ENSSSCG00000003549	Uncharacterized protein [Source:UniProtKB/TrEMBL;Acc:F1STU0]	gene	Name match	0	1.85908	-2.01808	3.87716	14.694
LEG2_PIG	5	7795558	7802455	+	481.347	null				Not found	0	2.3276	-2.64773	4.97533	31.4575
LIMK2	14	51124239	51149278	+	0.0016172471	LIMK2	ENSSSCG00000010025	Uncharacterized protein [Source:UniProtKB/TrEMBL;Acc:F1RPC2]	gene	Name match	0	5.13658	2.75104	2.38554	5.22541
LITAF	3	32319228	32329737	-	697.36	LITAF	ENSSSCG00000024982	Uncharacterized protein [Source:UniProtKB/TrEMBL;Acc:F1RL16]	gene	Name match	0	6.25742	4.56139	1.69603	3.24007
LMNB1	2	135104404	135158940	+	3.68358	LMNB1	ENSSSCG00000014248	lamin B1 [Source:HGNC Symbol;Acc:6637]	gene	Name match	0	5.04242	7.28118	-2.23876	0.211868	-4.71992
LPCAT3	5	66174538	66184169	+	1102.41	LPCAT3	ENSSSCG00000027205	lysophosphatidylcholine acyltransferase 3 [Source:HGNC Symbol;Acc:30244]	gene	Name match	0	7.35733	5.98467	1.37266	2.58948
LPHN2	6	121953514	122107954	-	1.80927	LPHN2	ENSSSCG00000003761	Uncharacterized protein [Source:UniProtKB/TrEMBL;Acc:F1SAG0]	gene	Name match	0	3.61743	-1.5464	5.16383	35.8482
LRRC8B	4	139107289	139121900	-	0.0142093655	LRRC8B	ENSSSCG00000022798	leucine rich repeat containing 8 family, member B [Source:HGNC Symbol;Acc:30692]	gene	Name match	0	0.662017	-2.64773	3.30975	9.91594
LUC7L3	12	27142942	27170104	+	1784.98	LUC7L3	ENSSSCG00000017555	Uncharacterized protein [Source:UniProtKB/TrEMBL;Acc:F1RTB6]	gene	Name match	0	5.45678	7.63366	-2.17687	0.221154	-4.52173
LYAR	8	5776313	5794798	-	1330.81	LYAR	ENSSSCG00000008729	Uncharacterized protein [Source:UniProtKB/TrEMBL;Acc:F1S5G4]	gene	Name match	0	4.13096	6.24485	-2.11389	0.231023	-4.32857
LYST	14	59535112	59679526	+	0.02632285	LYST	ENSSSCG00000010151	lysosomal trafficking regulator [Source:HGNC Symbol;Acc:1968]	gene	Name match	0	4.10824	2.55655	1.55169	2.93161
MAN2C1	7	62936863	62949430	+	0.017699547	MAN2C1	ENSSSCG00000001881	Uncharacterized protein [Source:UniProtKB/TrEMBL;Acc:F1SJ68]	gene	Name match	0	3.43795	1.37338	2.06457	4.1831
MAP4K4	3	55031471	55095734	-	394.893	MAP4K4	ENSSSCG00000008164	mitogen-activated protein kinase kinase kinase kinase 4 [Source:HGNC Symbol;Acc:6866]	gene	Name match	0	6.99752	5.37517	1.62235	3.07875
MARCH5	14	113406896	113435560	+	0.018649047	MARCH5	ENSSSCG00000010469	Uncharacterized protein [Source:UniProtKB/TrEMBL;Acc:F2Z5H0]	gene	Name match	0	3.65698	1.57904	2.07794	4.22205
MARCH8	14	98768454	98897870	+	0.0015597674	MARCH8	ENSSSCG00000010403	membrane-associated ring finger (C3HC4) 8, E3 ubiquitin protein ligase [Source:HGNC Symbol;Acc:23356]	gene	Name match	0	2.88693	-1.21306	4.1	17.1483
MARCKS	1	89851192	89857552	+	92.5829	MARCKS	ENSSSCG00000023610	Uncharacterized protein [Source:UniProtKB/TrEMBL;Acc:F1RZK9]	gene	Name match	0	7.82547	6.50927	1.3162	2.4901
ME2	1	110332948	110410112	+	0.006371463	ME2	ENSSSCG00000004522	Malic enzyme [Source:UniProtKB/TrEMBL;Acc:F1RPN9]	gene	Name match	0	6.06364	4.92703	1.1366	2.19863
MECP2	X	142301011	142303372	-	0.0023809585	MECP2	ENSSSCG00000012796	methyl CpG binding protein 2 (Rett syndrome) [Source:HGNC Symbol;Acc:6990]	gene	Name match	0	-1.53422	2.78872	-4.32294	0.0499648	-20.0141
MELK	1	265175024	265288283	+	0.017999534	MELK	ENSSSCG00000005344	Uncharacterized protein [Source:UniProtKB/TrEMBL;Acc:F1ST84]	gene	Name match	0	5.31213	6.72988	-1.41775	0.374297	-2.67168
MFSD3	4	384753	386540	-	0.0016862005	MFSD3	ENSSSCG00000005899	major facilitator superfamily domain containing 3 [Source:HGNC Symbol;Acc:25157]	gene	Name match	0	1.76808	-2.64773	4.41581	21.3447
MFSD7	8	158047	163748	-	394.893	MFSD7	ENSSSCG00000026084	Uncharacterized protein [Source:UniProtKB/TrEMBL;Acc:F1S9F4]	gene	Name match	0	5.98197	4.39099	1.59098	3.01254
MGMT	14	150607123	150887541	+	1949.95	MGMT	ENSSSCG00000010756	Uncharacterized protein [Source:UniProtKB/TrEMBL;Acc:F1SDK3]	gene	Name match	0	4.86752	0.734387	4.13314	17.5468
MIEN1	12	23045608	23047677	+	0.01165866	MIEN1	ENSSSCG00000017496	Uncharacterized protein [Source:UniProtKB/TrEMBL;Acc:F1RX93]	gene	Name match	0	5.22271	3.8045	1.41821	2.67254
MIS18BP1	1	195196671	195219710	+	0.021333538	MIS18BP1	ENSSSCG00000004999	Uncharacterized protein [Source:UniProtKB/TrEMBL;Acc:F1SI12]	gene	Name match	0	3.88099	5.71374	-1.83275	0.280729	-3.56216
MOES_PIG	X	58532203	58595134	+	339.677	null				Not found	0	8.02478	6.27635	1.74843	3.35992
MORN2	3	107607784	107611124	-	3.17151	MORN2	ENSSSCG00000008480	Uncharacterized protein [Source:UniProtKB/TrEMBL;Acc:F1S4S8]	gene	Name match	0	5.02881	2.19504	2.83377	7.12934
MPDZ	1	233121454	233214540	+	0.016136415	MPDZ	ENSSSCG00000005191	multiple PDZ domain protein [Source:HGNC Symbol;Acc:7208]	gene	Name match	0	1.92905	-1.9304	3.85945	14.5147
MPHOSPH10	1	159918114	159939610	-	29.6111	MPHOSPH10	ENSSSCG00000004847	M-phase phosphoprotein 10 (U3 small nucleolar ribonucleoprotein) [Source:HGNC Symbol;Acc:7213]	gene	Name match	0	4.50675	6.89641	-2.38966	0.190828	-5.24032
MPHOSPH8	11	86858326	86894015	+	0.041509375	MPHOSPH8	ENSSSCG00000009570	Uncharacterized protein [Source:UniProtKB/TrEMBL;Acc:F1RN27]	gene	Name match	0	5.75288	7.22504	-1.47216	0.360442	-2.77437
MPRB_PIG	7	52635491	52682127	+	0.867667	null				Not found	0	2.36101	-2.59706	4.95808	31.0835
[truncated: 315 more rows]

## Sheet: 787 DEGs C-IVF vs In Vivo
Probe	Chromosome	Start	End	Strand	FDR	Feature	ID	Description	Type	Orientation	Distance	C-IVF	In vivo	log2FC=log2(Control)-log2(InVivo)	FC(Control_InVivo)=2^log2FC	FC(log)=-1/value if value is <0 and >1
[truncated: 787 more rows]
