# Supplementary material for: DNA methylation and gene expression changes derived from assisted reproductive technologies can be decreased by reproductive fluids
Source: eLife. 2017 Feb 1;6:e23670. doi: 10.7554/eLife.23670 (PMC5340525; doi:10.7554/eLife.23670)
Supplement: Figure 3—source data 2. — This data relates to Figure 3C. DOI: http://dx.doi.org/10.7554/eLife.23670.009 [file elife-23670-fig3-data2.xlsx]

## Sheet: 328  DEG exclusive In vivo
Probe	Chromosome	Start	End	Strand	No value	Feature	ID	Description	Type	Orientation	Distance	C-IVF	Natur-IVF	In vivo
ABCC2	14	120400796	120478568	+	NaN	ABCC2	ENSSSCG00000010543	Uncharacterized protein [Source:UniProtKB/TrEMBL;Acc:F1S8V9]	gene	overlapping	0	5.8001	6.83251	3.51967
ABCG2_PIG	8	140193310	140228767	+	NaN	ABCG2	ENSSSCG00000009213	ATP-binding cassette sub-family G member 2 [Source:UniProtKB/Swiss-Prot;Acc:Q8MIB3]	gene	overlapping	0	6.25319	6.06683	3.85901
ABHD4	7	81641000	81656264	-	NaN	ABHD4	ENSSSCG00000002051	Uncharacterized protein [Source:UniProtKB/TrEMBL;Acc:F1S9A3]	gene	overlapping	0	6.57675	5.27465	1.58589
ACAT2	1	9399577	9411773	-	NaN	TCP1	ENSSSCG00000004048	T-complex protein 1 subunit alpha [Source:RefSeq peptide;Acc:NP_001230356]	gene	overlapping	0	7.72112	7.51583	6.37335
ACOD_PIG	14	120964210	120980992	+	NaN	SCD	ENSSSCG00000010554	Acyl-CoA desaturase [Source:UniProtKB/Swiss-Prot;Acc:O02858]	gene	overlapping	0	9.69959	9.00472	7.91383
ADAM19	16	71570441	71669557	+	NaN	ADAM19	ENSSSCG00000017052	Uncharacterized protein [Source:UniProtKB/TrEMBL;Acc:F1RQF1]	gene	overlapping	0	7.28671	7.2068	2.5734
ADAM-9	15	54597519	54674520	-	NaN	ADAM-9	ENSSSCG00000015808	Uncharacterized protein [Source:UniProtKB/TrEMBL;Acc:F1RZL4]	gene	overlapping	0	6.40554	6.62839	4.52082
ADT3_PIG	X	113743291	113746276	-	NaN	SLC25A6	ENSSSCG00000012623	ADP/ATP translocase 3 [Source:UniProtKB/Swiss-Prot;Acc:Q6QRN9]	gene	overlapping	0	4.86703	5.81668	7.30851
AGXT2L2	2	81754512	81803544	+	NaN	AGXT2L2	ENSSSCG00000014030	Uncharacterized protein [Source:UniProtKB/TrEMBL;Acc:F1S421]	gene	overlapping	0	5.89679	6.36353	7.54551
AHNAK	2	8544927	8553182	+	NaN	AHNAK	ENSSSCG00000027969	AHNAK nucleoprotein [Source:HGNC Symbol;Acc:347]	gene	overlapping	0	10.023	9.80193	8.93488
AIF1_PIG	7	27520797	27522821	-	NaN	AIF1	ENSSSCG00000001408	Allograft inflammatory factor 1 [Source:UniProtKB/Swiss-Prot;Acc:P81076]	gene	overlapping	0	5.34435	4.36343	-1.25855
AKAP12	1	17317257	17322146	-	NaN	AKAP12	ENSSSCG00000004091	Uncharacterized protein [Source:UniProtKB/TrEMBL;Acc:F1S7W0]	gene	overlapping	0	0.578689	1.40961	4.34442
ANKRD22	14	109732654	109744247	-	NaN	ANKRD22	ENSSSCG00000010445	Uncharacterized protein [Source:UniProtKB/TrEMBL;Acc:F1SCY9]	gene	overlapping	0	2.94358	2.61313	-2.35988
ANO5	2	40382284	40466246	-	NaN	ANO5	ENSSSCG00000013344	Uncharacterized protein [Source:UniProtKB/TrEMBL;Acc:F1SFZ1]	gene	overlapping	0	3.9648	3.42007	-0.351061
ANXA5	8	109609049	109642588	+	NaN	ANXA5	ENSSSCG00000009097	annexin A5 [Source:HGNC Symbol;Acc:543]	gene	overlapping	0	5.50308	6.10285	3.53355
AP4B1	4	116862014	116874408	+	NaN	AP4B1	ENSSSCG00000006762	Uncharacterized protein [Source:UniProtKB/TrEMBL;Acc:F1SBR2]	gene	overlapping	0	2.59519	2.02158	-1.28959
APAF1	5	89443105	89581082	-	NaN	APAF1	ENSSSCG00000000884	Uncharacterized protein [Source:UniProtKB/TrEMBL;Acc:F1SQT5]	gene	overlapping	0	3.12664	3.13292	0.0620943
APEX2	X	53798772	53806945	+	NaN	APEX2	ENSSSCG00000012348	Uncharacterized protein [Source:UniProtKB/TrEMBL;Acc:F1RUD3]	gene	overlapping	0	0.4719	1.24949	3.57832
ARGI1_PIG	1	35580461	35594611	-	NaN	ARG1	ENSSSCG00000004195	Arginase-1 [Source:UniProtKB/Swiss-Prot;Acc:Q95JC8]	gene	overlapping	0	6.1886	5.28821	3.26727
ARHGAP32	9	61997169	62189255	-	NaN	ARHGAP32	ENSSSCG00000015238	Uncharacterized protein [Source:UniProtKB/TrEMBL;Acc:F1S6F5]	gene	overlapping	0	4.65696	4.20059	2.65408
ASAH1	17	6296100	6333861	-	NaN	ASAH1	ENSSSCG00000006995	N-acylsphingosine amidohydrolase (acid ceramidase) 1 [Source:HGNC Symbol;Acc:735]	gene	overlapping	0	6.66982	6.3225	3.18501
ASF1A	1	48348376	48365616	-	NaN	MCM9	ENSSSCG00000004246	Uncharacterized protein [Source:UniProtKB/TrEMBL;Acc:F1SF38]	gene	overlapping	0	3.5667	3.45739	5.10426
ATP13A3	13	140888272	141023097	-	NaN	ATP13A3	ENSSSCG00000011825	Uncharacterized protein [Source:UniProtKB/TrEMBL;Acc:F1SFG4]	gene	overlapping	0	6.07557	5.5465	7.1844
BAD	2	6897945	6909698	+	NaN	BAD	ENSSSCG00000013033	BCL2-associated agonist of cell death [Source:HGNC Symbol;Acc:936]	gene	overlapping	0	-0.950882	-1.40363	2.78129
BAK1	7	34279881	34288116	+	NaN	BAK1	ENSSSCG00000001516	Uncharacterized protein [Source:UniProtKB/TrEMBL;Acc:F1RZR2]	gene	overlapping	0	3.29374	2.39178	5.29308
BCAN	4	102095809	102114619	-	NaN	BCAN	ENSSSCG00000006477	Uncharacterized protein [Source:UniProtKB/TrEMBL;Acc:F1RP38]	gene	overlapping	0	-2.28422	-1.73696	2.10039
BMPR1B	8	133740991	133875493	-	NaN	BMPR1B	ENSSSCG00000029621	Uncharacterized protein [Source:UniProtKB/TrEMBL;Acc:F1RWW6]	gene	overlapping	0	3.36607	2.48098	-1.83754
BNC2	1	229662567	230108309	+	NaN	BNC2	ENSSSCG00000025613	Uncharacterized protein [Source:UniProtKB/TrEMBL;Acc:F1SNE1]	gene	overlapping	0	1.24812	2.78248	-2.45354
BTBD2	2	77259222	77264841	+	NaN	BTBD2	ENSSSCG00000013444	Uncharacterized protein [Source:UniProtKB/TrEMBL;Acc:F1SDH6]	gene	overlapping	0	4.25889	3.47598	-0.956253
C1ORF85	4	102459048	102461635	+	NaN	C1ORF85	ENSSSCG00000006488	Uncharacterized protein [Source:UniProtKB/TrEMBL;Acc:F1RP16]	gene	overlapping	0	4.79887	3.61974	0.245895
CALCOCO2	12	25005401	25036657	+	NaN	CALCOCO2	ENSSSCG00000017543	Uncharacterized protein [Source:UniProtKB/TrEMBL;Acc:F1RWF7]	gene	overlapping	0	4.96162	4.05837	1.54079
CAN1_PIG	2	6129549	6155373	-	NaN	CAPN1	ENSSSCG00000012999	Calpain-1 catalytic subunit [Source:UniProtKB/Swiss-Prot;Acc:P35750]	gene	overlapping	0	4.78917	4.45973	2.76501
CASQ2_PIG	4	115007632	115070760	+	NaN	CASQ2	ENSSSCG00000006745	Calsequestrin-2 [Source:UniProtKB/Swiss-Prot;Acc:O18934]	gene	overlapping	0	3.11283	1.90551	-1.83156
CAST	2	106934106	107128389	+	NaN	CAST	ENSSSCG00000014170	Calpastatin [Source:UniProtKB/Swiss-Prot;Acc:P12675]	gene	overlapping	0	4.17922	3.71253	0.0232804
CATB_PIG	14	16202844	16223503	-	NaN	CTSB	ENSSSCG00000023666	Cathepsin B Cathepsin B light chain Cathepsin B heavy chain [Source:UniProtKB/Swiss-Prot;Acc:A1E295]	gene	overlapping	0	5.67545	5.32125	2.33918
CATSPERG	6	42753692	42782998	+	NaN	CATSPERG	ENSSSCG00000002955	Uncharacterized protein [Source:UniProtKB/TrEMBL;Acc:F1RKJ0]	gene	overlapping	0	0.274306	0.964133	-2.93887
CCNG1_PIG	16	65189480	65197123	-	NaN	CCNG1	ENSSSCG00000017024	Cyclin-G1 [Source:UniProtKB/Swiss-Prot;Acc:Q52QT8]	gene	overlapping	0	9.44384	9.07019	7.34089
CD63	5	22651967	22654950	-	NaN	CD63	ENSSSCG00000000361	Uncharacterized protein [Source:UniProtKB/TrEMBL;Acc:F1SPK8]	gene	overlapping	0	7.9775	7.7782	5.53692
CDKN1A	7	37258053	37267163	+	NaN	CDKN1A	ENSSSCG00000022111	Uncharacterized protein [Source:UniProtKB/TrEMBL;Acc:F1RVT3]	gene	overlapping	0	6.31263	5.50891	2.04718
CIB2	7	53340541	53365176	+	NaN	CIB2	ENSSSCG00000001762	Uncharacterized protein [Source:UniProtKB/TrEMBL;Acc:F2Z527]	gene	overlapping	0	3.46433	3.20842	-0.322765
CNN2_PIG	2	77612062	77622362	+	NaN	CNN2	ENSSSCG00000030270	Calponin-2 [Source:UniProtKB/Swiss-Prot;Acc:Q08094]	gene	overlapping	0	2.33818	2.11533	-1.97588
COASY_PIG	12	20471075	20475435	-	NaN	COASY	ENSSSCG00000017398	Bifunctional coenzyme A synthase Phosphopantetheine adenylyltransferase Dephospho-CoA kinase [Source:UniProtKB/Swiss-Prot;Acc:Q8MIR4]	gene	overlapping	0	3.95805	3.42511	-0.535241
COMMD4	7	62965339	62971658	-	NaN	COMMD4	ENSSSCG00000001884	COMM domain containing 4 [Source:HGNC Symbol;Acc:26027]	gene	overlapping	0	5.48952	4.56921	2.90617
COPG2	18	19229658	19330534	+	NaN	COPG2	ENSSSCG00000016553	Coatomer subunit gamma [Source:UniProtKB/TrEMBL;Acc:F6JTE1]	gene	overlapping	0	4.27032	3.98727	2.32518
CP51A_PIG	9	78792885	78814967	-	NaN	CYP51A1	ENSSSCG00000015311	Lanosterol 14-alpha demethylase [Source:UniProtKB/Swiss-Prot;Acc:O46420]	gene	overlapping	0	7.93381	7.07687	1.22186
CTIF	1	107666405	108030895	+	NaN	CTIF	ENSSSCG00000004506	Uncharacterized protein [Source:UniProtKB/TrEMBL;Acc:F1RPR2]	gene	overlapping	0	4.4634	3.44592	0.0846994
CTNNAL1	1	280535474	280609024	-	NaN	CTNNAL1	ENSSSCG00000005443	Uncharacterized protein [Source:UniProtKB/TrEMBL;Acc:F1SP25]	gene	overlapping	0	6.08411	5.86399	4.34484
CTPS	6	157249207	157280736	-	NaN	CTPS	ENSSSCG00000003973	Uncharacterized protein [Source:UniProtKB/TrEMBL;Acc:F1SF78]	gene	overlapping	0	3.74101	3.99457	5.26994
CTSL1	10	31907424	31913492	-	NaN	DAPK1	ENSSSCG00000026279	death-associated protein kinase 1 [Source:HGNC Symbol;Acc:2674]	gene	overlapping	0	5.30279	4.96077	3.19564
CXL16_PIG	12	54265516	54269345	+	NaN	CXCL16	ENSSSCG00000017920	C-X-C motif chemokine 16 [Source:UniProtKB/Swiss-Prot;Acc:Q9GKE2]	gene	overlapping	0	3.00229	3.0374	-2.17087
DDB1	2	9718645	9748655	+	NaN	DDB1	ENSSSCG00000013094	Uncharacterized protein [Source:UniProtKB/TrEMBL;Acc:F1RIE2]	gene	overlapping	0	6.19168	5.34423	3.75488
DDX3X	Y	1115738	1132911	+	NaN	UTY	ENSSSCG00000025253	Ubiquitously transcribed tetratricopeptide repeat Y-linked [Source:UniProtKB/TrEMBL;Acc:D3UD07]	gene	overlapping	0	6.14403	5.44342	-1.18442
DGKA_PIG	5	22811683	22835859	+	NaN	DGKA	ENSSSCG00000000370	Diacylglycerol kinase alpha [Source:UniProtKB/Swiss-Prot;Acc:P20192]	gene	overlapping	0	5.63036	5.10711	2.20681
DNAJC21	16	21425596	21454112	+	NaN	DNAJC21	ENSSSCG00000016828	Uncharacterized protein [Source:UniProtKB/TrEMBL;Acc:F1SND3]	gene	overlapping	0	4.30923	3.95382	6.12265
DOCK9	11	74997784	75158789	-	NaN	DOCK9	ENSSSCG00000022112	Uncharacterized protein [Source:UniProtKB/TrEMBL;Acc:F1RP30]	gene	overlapping	0	4.69433	4.8265	2.76067
DPCD	14	122360577	122381270	+	NaN	DPCD	ENSSSCG00000010565	Uncharacterized protein [Source:UniProtKB/TrEMBL;Acc:F1S8U0]	gene	overlapping	0	4.66771	5.02278	2.81289
DPP4_PIG	15	76152553	76235536	-	NaN	DPP4	ENSSSCG00000015894	Dipeptidyl peptidase 4 Dipeptidyl peptidase 4 membrane form Dipeptidyl peptidase 4 soluble form [Source:UniProtKB/Swiss-Prot;Acc:P22411]	gene	overlapping	0	7.32509	6.68035	3.52403
DSG3	6	107987898	108009075	+	NaN	DSG3	ENSSSCG00000027160	desmoglein 3 [Source:HGNC Symbol;Acc:3050]	gene	overlapping	0	5.24604	4.00723	-1.83754
EBF3	14	150935646	151052955	-	NaN	EBF3	ENSSSCG00000010757	early B-cell factor 3 [Source:HGNC Symbol;Acc:19087]	gene	overlapping	0	0.538546	0.654494	-2.83754
ECE1	6	73662021	73717839	-	NaN	ECE1	ENSSSCG00000003513	Uncharacterized protein [Source:UniProtKB/TrEMBL;Acc:F1SU04]	gene	overlapping	0	2.02067	1.14964	-2.93887
ENSSSCG00000002345	7	102665568	102680830	+	NaN	ENSSSCG00000002345	ENSSSCG00000002345	Uncharacterized protein [Source:UniProtKB/TrEMBL;Acc:F1S3J3]	gene	overlapping	0	6.71915	5.37493	3.91372
ENSSSCG00000002452	7	120780129	120811703	-	NaN	ENSSSCG00000002452	ENSSSCG00000002452	No description	gene	overlapping	0	7.98279	9.10105	5.98195
ENSSSCG00000004081	1	16065606	16221209	-	NaN	ENSSSCG00000004081	ENSSSCG00000004081	Uncharacterized protein [Source:UniProtKB/TrEMBL;Acc:F1S7X1]	gene	overlapping	0	5.70773	4.76998	2.5278
ENSSSCG00000004579	1	123412643	123414108	-	NaN	ANXA2	ENSSSCG00000004578	Annexin A2 [Source:UniProtKB/Swiss-Prot;Acc:P19620]	gene	overlapping	0	6.72119	6.89471	4.78194
ENSSSCG00000004963	1	184592890	184629728	-	NaN	ENSSSCG00000004963	ENSSSCG00000004963	Uncharacterized protein [Source:UniProtKB/TrEMBL;Acc:F1SIU2]	gene	overlapping	0	4.5136	4.57905	6.36683
ENSSSCG00000006711	4	111112801	111134628	-	NaN	ENSSSCG00000006711	ENSSSCG00000006711	No description	gene	overlapping	0	2.95092	3.03634	-0.679561
ENSSSCG00000008068	3	42962864	43014160	-	NaN	ENSSSCG00000008068	ENSSSCG00000008068	No description	gene	overlapping	0	4.65843	4.80161	2.61871
ENSSSCG00000009215	8	140152539	140167776	+	NaN	ENSSSCG00000009215	ENSSSCG00000009215	No description	gene	overlapping	0	4.95157	4.58266	2.16611
ENSSSCG00000009432	15	147864482	147920509	+	NaN	ENSSSCG00000009432	ENSSSCG00000009432	No description	gene	overlapping	0	0.659612	1.72331	-2.88821
ENSSSCG00000009633	14	7785333	7817139	-	NaN	ENSSSCG00000009633	ENSSSCG00000009633	Uncharacterized protein [Source:UniProtKB/TrEMBL;Acc:F1RM98]	gene	overlapping	0	2.75008	1.92782	-2.55487
ENSSSCG00000012006	13	189414690	189546760	+	NaN	ENSSSCG00000012006	ENSSSCG00000012006	No description	gene	overlapping	0	1.57359	1.80696	-2.93887
ENSSSCG00000012178	Y	1277624	1297330	+	NaN	ENSSSCG00000012178	ENSSSCG00000012178	No description	gene	overlapping	0	5.12124	5.34714	-2.55487
ENSSSCG00000014909	9	21887327	22005568	-	NaN	ENSSSCG00000014909	ENSSSCG00000014909	Uncharacterized protein [Source:UniProtKB/TrEMBL;Acc:F1STT2]	gene	overlapping	0	0.768795	0.723311	-2.93887
ENSSSCG00000016781	16	4222391	4259625	+	NaN	ENSSSCG00000016781	ENSSSCG00000016781	No description	gene	overlapping	0	3.80136	3.30079	1.17452
ENSSSCG00000016795	16	6829357	6866653	+	NaN	ENSSSCG00000016795	ENSSSCG00000016795	Uncharacterized protein [Source:UniProtKB/TrEMBL;Acc:F1SRL9]	gene	overlapping	0	8.11138	8.14077	6.95538
ENSSSCG00000017401	12	20501211	20557132	-	NaN	ENSSSCG00000017401	ENSSSCG00000017401	Uncharacterized protein [Source:UniProtKB/TrEMBL;Acc:F1S1D6]	gene	overlapping	0	5.13446	3.99602	2.50383
ENSSSCG00000017712	12	41351700	41438001	-	NaN	ENSSSCG00000017712	ENSSSCG00000017712	No description	gene	overlapping	0	6.90268	7.11844	5.48599
ENSSSCG00000020808	3	17095561	17105542	-	NaN	ENSSSCG00000020808	ENSSSCG00000020808	No description	gene	overlapping	0	5.65788	5.86818	7.53406
ENSSSCG00000020837	6	45173190	45196492	-	NaN	B9D2	ENSSSCG00000003013	Uncharacterized protein [Source:UniProtKB/TrEMBL;Acc:F1RH86]	gene	overlapping	0	4.94159	3.32918	1.03106
ENSSSCG00000021254	14	86814321	86825802	-	NaN	ENSSSCG00000021254	ENSSSCG00000021254	No description	gene	overlapping	0	2.83055	2.56107	-0.484574
ENSSSCG00000022342	9	28754240	28756842	-	NaN	ENSSSCG00000022342	ENSSSCG00000022342	Elongation factor 1-alpha [Source:UniProtKB/TrEMBL;Acc:F1STN7]	gene	overlapping	0	-1.95088	-2.4543	1.82734
ENSSSCG00000023305	6	26369804	26370746	-	NaN	MT3	ENSSSCG00000024305	Metallothionein-3 [Source:UniProtKB/Swiss-Prot;Acc:P55944]	gene	overlapping	0	-3.05222	-1.92598	1.37204
ENSSSCG00000023819	Y	864998	868128	-	NaN	ENSSSCG00000023819	ENSSSCG00000023819	No description	gene	overlapping	0	3.88154	2.55748	-2.93887
ENSSSCG00000024057	1	130700419	130733250	+	NaN	ENSSSCG00000024057	ENSSSCG00000024057	No description	gene	overlapping	0	2.17524	1.16779	-2.88821
ENSSSCG00000026125	13	126312487	126312831	-	NaN	ENSSSCG00000026125	ENSSSCG00000026125	No description	gene	overlapping	0	2.44341	1.232	-2.88821
ENSSSCG00000026857	6	89021503	89024892	+	NaN	ENSSSCG00000026857	ENSSSCG00000026857	No description	gene	overlapping	0	5.00453	4.58748	3.01493
ENSSSCG00000027447	5	47183562	47366161	+	NaN	ENSSSCG00000027447	ENSSSCG00000027447	No description	gene	overlapping	0	2.39048	3.60771	-1.25855
ENSSSCG00000029066	10	75367603	75370787	+	NaN	ENSSSCG00000029066	ENSSSCG00000029066	Isopentyl-diphosphate delta isomerase [Source:UniProtKB/TrEMBL;Acc:Q6EEJ4]	gene	overlapping	0	6.45915	6.35294	4.03366
ENSSSCG00000029857	X	21570974	21590470	+	NaN	ENSSSCG00000029857	ENSSSCG00000029857	Uncharacterized protein [Source:UniProtKB/TrEMBL;Acc:F1SPY4]	gene	overlapping	0	6.14191	6.04047	7.32343
ENSSSCG00000030611	5	62800573	62801511	+	NaN	KIAA1467	ENSSSCG00000000619	Uncharacterized protein [Source:UniProtKB/TrEMBL;Acc:F1SQ71]	gene	overlapping	0	6.872	6.62118	5.10965
EPB41L4A	2	121986204	122087421	-	NaN	EPB41L4A	ENSSSCG00000014209	Uncharacterized protein [Source:UniProtKB/TrEMBL;Acc:F1RLG2]	gene	overlapping	0	3.86408	2.86045	-0.780896
EPOR_PIG	2	70426996	70432219	-	NaN	EPOR	ENSSSCG00000013618	Erythropoietin receptor [Source:UniProtKB/Swiss-Prot;Acc:Q9MYZ9]	gene	overlapping	0	3.61561	2.83318	-0.730229
F2RL1	2	87348805	87363748	+	NaN	F2RL1	ENSSSCG00000014091	Uncharacterized protein [Source:UniProtKB/TrEMBL;Acc:F1S2H4]	gene	overlapping	0	6.17663	5.81206	3.26511
FADS1	2	9247472	9260845	-	NaN	FADS1	ENSSSCG00000024015	fatty acid desaturase 1 [Source:RefSeq peptide;Acc:NP_001106512]	gene	overlapping	0	5.86785	6.22634	3.55556
FAM13B	2	145684311	145752899	-	NaN	FAM13B	ENSSSCG00000029125	family with sequence similarity 13, member B [Source:HGNC Symbol;Acc:1335]	gene	overlapping	0	1.75619	1.93095	3.77997
FAN1	1	159864765	159907060	-	NaN	FAN1	ENSSSCG00000004845	Uncharacterized protein [Source:UniProtKB/TrEMBL;Acc:F1SNR1]	gene	overlapping	0	2.49722	1.77277	4.17238
FLNB	13	43872847	43896031	-	NaN	ABHD6	ENSSSCG00000011470	Uncharacterized protein [Source:UniProtKB/TrEMBL;Acc:F1SGJ4]	gene	overlapping	0	7.24711	6.51008	5.58901
FLOT2	12	47153569	47162508	+	NaN	FLOT2	ENSSSCG00000017777	Uncharacterized protein [Source:UniProtKB/TrEMBL;Acc:F1RNA6]	gene	overlapping	0	2.11012	2.0858	-1.67956
FOS_PIG	7	104293657	104297121	+	NaN	FOS	ENSSSCG00000002383	Proto-oncogene c-Fos [Source:UniProtKB/Swiss-Prot;Acc:O97930]	gene	overlapping	0	1.40806	1.32713	6.4824
FOXN2	3	98079346	98147165	+	NaN	FOXN2	ENSSSCG00000029593	Uncharacterized protein [Source:UniProtKB/TrEMBL;Acc:F1SQI4]	gene	overlapping	0	2.70099	2.83362	4.53997
FOXRED2	5	8916285	8937001	+	NaN	FOXRED2	ENSSSCG00000000142	FAD-dependent oxidoreductase domain containing 2 [Source:HGNC Symbol;Acc:26264]	gene	overlapping	0	5.13241	4.00372	1.30371
FXYD4	14	66464897	66469117	+	NaN	FXYD4	ENSSSCG00000010202	Uncharacterized protein [Source:UniProtKB/TrEMBL;Acc:F1RG18]	gene	overlapping	0	8.77847	7.76974	6.17133
GAR1	8	120483790	120496430	-	NaN	GAR1	ENSSSCG00000020907	Uncharacterized protein [Source:UniProtKB/TrEMBL;Acc:F1S134]	gene	overlapping	0	5.31738	6.40448	8.18636
GCNT1	1	256219662	256220948	+	NaN	GCNT1	ENSSSCG00000005277	Uncharacterized protein [Source:UniProtKB/TrEMBL;Acc:F1SIN0]	gene	overlapping	0	4.03651	2.98376	0.84876
GCNT3	1	124393189	124394511	-	NaN	GCNT3	ENSSSCG00000004584	glucosaminyl (N-acetyl) transferase 3, mucin type [Source:HGNC Symbol;Acc:4205]	gene	overlapping	0	3.4627	3.42195	-1.56842
GDPD2	X	63646167	63656062	+	NaN	GDPD2	ENSSSCG00000012376	Uncharacterized protein [Source:UniProtKB/TrEMBL;Acc:F1RTL2]	gene	overlapping	0	5.5156	5.40206	3.93793
GGA2	10	135679	165446	+	NaN	GGA2	ENSSSCG00000010798	golgi-associated, gamma adaptin ear containing, ARF binding protein 2 [Source:HGNC Symbol;Acc:16064]	gene	overlapping	0	7.33125	6.60244	4.72785
GGLO_PIG	14	12480095	12512560	+	NaN	GULO	ENSSSCG00000009667	L-gulonolactone oxidase [Source:UniProtKB/Swiss-Prot;Acc:Q8HXW0]	gene	overlapping	0	6.85672	6.36251	3.6777
GIPC2	6	125311965	125459978	-	NaN	GIPC2	ENSSSCG00000027873	Uncharacterized protein [Source:UniProtKB/TrEMBL;Acc:F1S9S7]	gene	overlapping	0	6.02912	5.41501	3.97405
GLDC	1	241060724	241084165	+	NaN	GLDC	ENSSSCG00000005199	Uncharacterized protein [Source:UniProtKB/TrEMBL;Acc:F1SMN8]	gene	overlapping	0	7.14887	7.26056	5.94075
GLO1	7	39241001	39271606	-	NaN	GLO1	ENSSSCG00000027778	Uncharacterized protein [Source:UniProtKB/TrEMBL;Acc:F1RVR3]	gene	overlapping	0	6.61542	6.08958	4.25036
GM2A	16	77974389	77987649	-	NaN	GM2A	ENSSSCG00000017087	GM2 ganglioside activator [Source:HGNC Symbol;Acc:4367]	gene	overlapping	0	11.2017	10.7834	7.88335
GNL3	13	38020617	38028557	+	NaN	GNL3	ENSSSCG00000011449	Uncharacterized protein [Source:UniProtKB/TrEMBL;Acc:F1SH97]	gene	overlapping	0	4.20289	4.16784	5.97918
GORASP1	13	26042858	26057279	-	NaN	WDR48	ENSSSCG00000011261	Uncharacterized protein [Source:UniProtKB/TrEMBL;Acc:F2Z5V5]	gene	overlapping	0	4.66476	4.37911	2.46455
GPR64	X	16578875	16597106	-	NaN	GPR64	ENSSSCG00000029756	Uncharacterized protein [Source:UniProtKB/TrEMBL;Acc:F1SQN9]	gene	overlapping	0	2.01164	2.10234	-2.93887
GRB10_PIG	9	150266276	150423905	-	NaN	GRB10	ENSSSCG00000015631	Growth factor receptor-bound protein 10 [Source:UniProtKB/Swiss-Prot;Acc:B5KFD7]	gene	overlapping	0	3.06715	2.44542	-1.97588
GRM8	18	22609817	23086523	+	NaN	GRM8	ENSSSCG00000022865	Glutamate receptor metabotropic 8 [Source:UniProtKB/TrEMBL;Acc:F4YE29]	gene	overlapping	0	1.48473	0.477655	-2.93887
GSTP1_PIG	2	3618668	3620934	-	NaN	GSTP1	ENSSSCG00000012897	Glutathione S-transferase P [Source:UniProtKB/Swiss-Prot;Acc:P80031]	gene	overlapping	0	8.47552	7.34316	4.91214
GTR2_PIG	13	118535743	118557269	-	NaN	SLC2A2	ENSSSCG00000020927	Solute carrier family 2, facilitated glucose transporter member 2 [Source:UniProtKB/Swiss-Prot;Acc:O62786]	gene	overlapping	0	5.32058	4.70267	-0.410443
HCCS	X	8445008	8456475	+	NaN	HCCS	ENSSSCG00000012111	Uncharacterized protein [Source:UniProtKB/TrEMBL;Acc:F1SG16]	gene	overlapping	0	3.43867	4.30732	5.65096
HEBP2	1	29141326	29149072	-	NaN	HEBP2	ENSSSCG00000004150	Uncharacterized protein [Source:UniProtKB/TrEMBL;Acc:F1S6A9]	gene	overlapping	0	2.21237	2.00195	-2.22154
HEXB_PIG	2	85331775	85372032	+	NaN	HEXB	ENSSSCG00000014073	Beta-hexosaminidase subunit beta [Source:UniProtKB/Swiss-Prot;Acc:Q29548]	gene	overlapping	0	5.91173	6.82104	4.3697
HIBADH	18	49630501	49645365	-	NaN	HIBADH	ENSSSCG00000016695	Uncharacterized protein [Source:UniProtKB/TrEMBL;Acc:F1SHU0]	gene	overlapping	0	5.51462	5.42054	3.95532
HMDH_PIG	2	85967321	85990095	+	NaN	HMGCR	ENSSSCG00000014080	3-hydroxy-3-methylglutaryl-coenzyme A reductase [Source:UniProtKB/Swiss-Prot;Acc:Q1W675]	gene	overlapping	0	7.45398	6.8519	3.89563
HMGB2_PIG	14	17859679	17862757	+	NaN	HMGB2	ENSSSCG00000009704	High mobility group protein B2 [Source:UniProtKB/Swiss-Prot;Acc:P17741]	gene	overlapping	0	5.19003	5.70488	7.39436
HMGCS1	16	29433805	29454088	+	NaN	HMGCS1	ENSSSCG00000016872	Uncharacterized protein [Source:UniProtKB/TrEMBL;Acc:F1SMG8]	gene	overlapping	0	9.1062	8.78448	5.56628
HNRNPA2B1	15	59810834	59811895	+	NaN	HNRNPA2B1	ENSSSCG00000015836	Uncharacterized protein [Source:UniProtKB/TrEMBL;Acc:F1RX74]	gene	overlapping	0	8.34036	8.15142	9.42463
HNRNPU	10	19918406	19928777	+	NaN	HNRNPU	ENSSSCG00000010877	Uncharacterized protein [Source:UniProtKB/TrEMBL;Acc:F1S8L9]	gene	overlapping	0	7.13615	7.11651	8.08039
HTATIP2	2	41963507	41980418	+	NaN	HTATIP2	ENSSSCG00000013349	Uncharacterized protein [Source:UniProtKB/TrEMBL;Acc:F1SFY5]	gene	overlapping	0	3.88965	4.09161	1.66711
IQGAP1	7	58161247	58190445	-	NaN	IQGAP1	ENSSSCG00000001814	Uncharacterized protein [Source:UniProtKB/TrEMBL;Acc:F1RMJ4]	gene	overlapping	0	6.63711	6.47453	5.16274
KBTBD3	9	39910815	39920566	-	NaN	KBTBD3	ENSSSCG00000014999	Uncharacterized protein [Source:UniProtKB/TrEMBL;Acc:F1SV34]	gene	overlapping	0	3.08852	2.74677	-0.604058
KIAA0913	14	82638231	82654920	+	NaN	KIAA0913	ENSSSCG00000010309	Uncharacterized protein [Source:UniProtKB/TrEMBL;Acc:F1SU41]	gene	overlapping	0	4.25659	3.9206	2.3325
KIAA1109	8	108893587	109077862	-	NaN	KIAA1109	ENSSSCG00000009090	KIAA1109 [Source:HGNC Symbol;Acc:26953]	gene	overlapping	0	7.24208	6.60664	4.66572
KIAA1407	13	155530844	155568016	+	NaN	KIAA1407	ENSSSCG00000011913	Uncharacterized protein [Source:UniProtKB/TrEMBL;Acc:F1SP97]	gene	overlapping	0	1.71772	1.38998	-2.88821
KIF21A	5	73380996	73586157	-	NaN	KIF21A	ENSSSCG00000000779	Uncharacterized protein [Source:UniProtKB/TrEMBL;Acc:F1SHQ2]	gene	overlapping	0	3.53135	4.47049	5.93801
KLHL5	8	31861892	31953968	+	NaN	KLHL5	ENSSSCG00000008787	Uncharacterized protein [Source:UniProtKB/TrEMBL;Acc:F1S4I8]	gene	overlapping	0	3.39308	3.63934	0.400544
LAMB1	9	118439608	118514521	-	NaN	LAMB1	ENSSSCG00000015444	laminin, beta 1 [Source:HGNC Symbol;Acc:6486]	gene	overlapping	0	5.75697	5.44212	3.2499
LAMC1	9	136548464	136668804	-	NaN	LAMC1	ENSSSCG00000015555	Uncharacterized protein [Source:UniProtKB/TrEMBL;Acc:F1S663]	gene	overlapping	0	6.99139	6.1724	2.96543
LDLRAP1	6	76601345	76625150	+	NaN	LDLRAP1	ENSSSCG00000003549	Uncharacterized protein [Source:UniProtKB/TrEMBL;Acc:F1STU0]	gene	overlapping	0	1.58489	1.65634	-2.30922
LEG2_PIG	5	7795558	7802455	+	NaN	LGALS2	ENSSSCG00000021728	Galectin-2 [Source:UniProtKB/Swiss-Prot;Acc:Q29373]	gene	overlapping	0	2.31365	2.12486	-2.93887
LIMK2	14	51124239	51149278	+	NaN	LIMK2	ENSSSCG00000010025	Uncharacterized protein [Source:UniProtKB/TrEMBL;Acc:F1RPC2]	gene	overlapping	0	5.4459	4.93384	2.4599
LMNB1	2	135104404	135158940	+	NaN	LMNB1	ENSSSCG00000014248	lamin B1 [Source:HGNC Symbol;Acc:6637]	gene	overlapping	0	4.17102	4.83968	6.99004
LPCAT3	5	66174538	66184169	+	NaN	LPCAT3	ENSSSCG00000027205	lysophosphatidylcholine acyltransferase 3 [Source:HGNC Symbol;Acc:30244]	gene	overlapping	0	7.67853	7.15459	5.69353
LPHN2	6	121953514	122107954	-	NaN	LPHN2	ENSSSCG00000003761	Uncharacterized protein [Source:UniProtKB/TrEMBL;Acc:F1SAG0]	gene	overlapping	0	3.63962	3.41469	-1.83754
LRRC8B	4	139107289	139121900	-	NaN	LRRC8B	ENSSSCG00000022798	leucine rich repeat containing 8 family, member B [Source:HGNC Symbol;Acc:30692]	gene	overlapping	0	1.2327	0.459275	-2.93887
LUC7L3	12	27142942	27170104	+	NaN	LUC7L3	ENSSSCG00000017555	Uncharacterized protein [Source:UniProtKB/TrEMBL;Acc:F1RTB6]	gene	overlapping	0	5.33779	5.25404	7.34251
LYAR	8	5776313	5794798	-	NaN	LYAR	ENSSSCG00000008729	Uncharacterized protein [Source:UniProtKB/TrEMBL;Acc:F1S5G4]	gene	overlapping	0	3.94328	3.92821	5.95371
MAP4K4	3	55031471	55095734	-	NaN	MAP4K4	ENSSSCG00000008164	mitogen-activated protein kinase kinase kinase kinase 4 [Source:HGNC Symbol;Acc:6866]	gene	overlapping	0	6.9993	6.79477	5.08403
MARCH8	14	98768454	98897870	+	NaN	MARCH8	ENSSSCG00000010403	membrane-associated ring finger (C3HC4) 8, E3 ubiquitin protein ligase [Source:HGNC Symbol;Acc:23356]	gene	overlapping	0	4.47754	2.68419	-1.5042
MARCKS	1	89851192	89857552	+	NaN	MARCKS	ENSSSCG00000023610	Uncharacterized protein [Source:UniProtKB/TrEMBL;Acc:F1RZK9]	gene	overlapping	0	7.44418	7.62273	6.21812
MECP2	X	142301011	142303372	-	NaN	MECP2	ENSSSCG00000012796	methyl CpG binding protein 2 (Rett syndrome) [Source:HGNC Symbol;Acc:6990]	gene	overlapping	0	-0.648585	-1.73696	2.49758
MELK	1	265175024	265288283	+	NaN	MELK	ENSSSCG00000005344	Uncharacterized protein [Source:UniProtKB/TrEMBL;Acc:F1ST84]	gene	overlapping	0	4.67932	5.10939	6.43874
MFSD7	8	158047	163748	-	NaN	MYL5	ENSSSCG00000027502	myosin, light chain 5, regulatory [Source:HGNC Symbol;Acc:7586]	gene	overlapping	0	6.28512	5.77923	4.09985
MGMT	14	150607123	150887541	+	NaN	MGMT	ENSSSCG00000010756	Uncharacterized protein [Source:UniProtKB/TrEMBL;Acc:F1SDK3]	gene	overlapping	0	5.90964	4.66478	0.443245
MIEN1	12	23045608	23047677	+	NaN	MIEN1	ENSSSCG00000017496	Uncharacterized protein [Source:UniProtKB/TrEMBL;Acc:F1RX93]	gene	overlapping	0	5.06589	5.01997	3.51336
MOES_PIG	X	58532203	58595134	+	NaN	MSN	ENSSSCG00000012365	Moesin [Source:UniProtKB/Swiss-Prot;Acc:P26042]	gene	overlapping	0	8.35904	7.82204	5.98521
MORN2	3	107607784	107611124	-	NaN	MORN2	ENSSSCG00000008480	Uncharacterized protein [Source:UniProtKB/TrEMBL;Acc:F1S4S8]	gene	overlapping	0	5.01509	4.82606	1.9039
MSMO1_PIG	8	45557528	45618352	-	NaN	CPE	ENSSSCG00000008854	carboxypeptidase E [Source:RefSeq peptide;Acc:NP_001090908]	gene	overlapping	0	7.20359	6.22457	3.57431
MST1R	13	35590568	35603228	-	NaN	MST1R	ENSSSCG00000027992	macrophage stimulating 1 receptor (c-met-related tyrosine kinase) [Source:HGNC Symbol;Acc:7381]	gene	overlapping	0	2.59919	1.84328	-2.35988
MYCBP	6	87855743	87863421	-	NaN	MYCBP	ENSSSCG00000003649	Uncharacterized protein [Source:UniProtKB/TrEMBL;Acc:F2Z5W0]	gene	overlapping	0	3.5969	2.93491	5.17959
MYOF	14	114504895	114644090	-	NaN	MYOF	ENSSSCG00000010476	Uncharacterized protein [Source:UniProtKB/TrEMBL;Acc:F1SC82]	gene	overlapping	0	7.24937	6.67265	5.2941
NAAA	8	75709379	75738808	-	NaN	NAAA	ENSSSCG00000008973	Uncharacterized protein [Source:UniProtKB/TrEMBL;Acc:F1RYU7]	gene	overlapping	0	7.31754	7.26715	5.35969
NANP	17	35137342	35149722	+	NaN	NANP	ENSSSCG00000022124	Uncharacterized protein [Source:UniProtKB/TrEMBL;Acc:F1SAS1]	gene	overlapping	0	2.77679	3.82029	5.29363
NB5R3_PIG	5	3610542	3628216	+	NaN	CYB5R3	ENSSSCG00000000038	NADH-cytochrome b5 reductase 3 [Source:UniProtKB/Swiss-Prot;Acc:P83686]	gene	overlapping	0	5.12473	4.2774	2.66063
NBEAL1	15	118048753	118087143	-	NaN	NBEAL1	ENSSSCG00000016118	neurobeachin-like 1 [Source:HGNC Symbol;Acc:20681]	gene	overlapping	0	6.24592	5.28263	4.07976
NCL	15	145939849	145945176	+	NaN	NCL	ENSSSCG00000016275	Uncharacterized protein [Source:UniProtKB/TrEMBL;Acc:F1SMV6]	gene	overlapping	0	6.70435	6.80932	8.61068
NDUFS2	4	97103619	97113988	-	NaN	NDUFS2	ENSSSCG00000006358	Uncharacterized protein [Source:UniProtKB/TrEMBL;Acc:F1S1A8]	gene	overlapping	0	7.69004	7.77998	8.89354
NEK1	14	21439165	21617923	+	NaN	NEK1	ENSSSCG00000009714	Uncharacterized protein [Source:UniProtKB/TrEMBL;Acc:F1RIY1]	gene	overlapping	0	6.51536	5.65492	4.45246
NEO1	7	64688213	64785702	-	NaN	NEO1	ENSSSCG00000001921	Uncharacterized protein [Source:UniProtKB/TrEMBL;Acc:F1SI93]	gene	overlapping	0	3.07597	2.58896	-2.78687
NFL_PIG	14	10087370	10093095	+	NaN	NEFL	ENSSSCG00000009649	Neurofilament light polypeptide [Source:UniProtKB/Swiss-Prot;Acc:P02547]	gene	overlapping	0	-2.90021	-1.51851	3.02885
NNRE_PIG	4	102288846	102294779	+	NaN	APOA1BP	ENSSSCG00000006480	NAD(P)H-hydrate epimerase [Source:UniProtKB/Swiss-Prot;Acc:Q0PIT9]	gene	overlapping	0	4.60224	4.28935	6.3287
NOLC1	14	123007503	123020014	+	NaN	NOLC1	ENSSSCG00000010576	Uncharacterized protein [Source:UniProtKB/TrEMBL;Acc:F1S8T1]	gene	overlapping	0	5.50204	5.12467	6.4624
NOP58	15	117351067	117375010	+	NaN	NOP58	ENSSSCG00000022225	NOP58 ribonucleoprotein homolog (yeast) [Source:HGNC Symbol;Acc:29926]	gene	overlapping	0	4.6857	5.14778	6.69372
NP_001001536.2	2	10047755	10056384	+	NaN	PAG6	ENSSSCG00000013090	pregnancy-associated glycoprotein 2 [Source:RefSeq peptide;Acc:NP_001001536]	gene	overlapping	0	4.2377	1.13351	-2.88821
NP_001037999.1	8	143439802	143519675	-	NaN	CDS1	ENSSSCG00000009231	phosphatidate cytidylyltransferase 1 [Source:RefSeq peptide;Acc:NP_001037999]	gene	overlapping	0	3.28954	4.06769	0.117878
NP_001070698.2	4	102860516	102870909	+	NaN	RIT1	ENSSSCG00000023991	Ras-like without CAAX 1 [Source:RefSeq peptide;Acc:NP_001070698]	gene	overlapping	0	5.57633	5.65182	3.88305
NP_001090956.1	15	121838760	121892429	-	NaN	KLF7	ENSSSCG00000029998	Krueppel-like factor 7 [Source:RefSeq peptide;Acc:NP_001090956]	gene	overlapping	0	3.08689	3.41908	0.140249
NP_001090970.1	1	204956631	204974098	+	NaN	LGALS3	ENSSSCG00000005055	galectin-3 [Source:RefSeq peptide;Acc:NP_001090970]	gene	overlapping	0	5.38618	4.348	0.733877
NP_001090973.1	11	7585525	7661067	-	NaN	HSPH1	ENSSSCG00000009334	heat shock protein 105 kDa [Source:RefSeq peptide;Acc:NP_001090973]	gene	overlapping	0	7.47069	6.79846	9.04237
NP_001093394.1	14	142500503	142565884	-	NaN	FGFR2	ENSSSCG00000010698	fibroblast growth factor receptor 2 [Source:RefSeq peptide;Acc:NP_001093394]	gene	overlapping	0	3.50405	2.63443	-2.93887
NP_001093400.1	12	1023477	1034681	-	NaN	FASN	ENSSSCG00000029944	fatty acid synthase [Source:RefSeq peptide;Acc:NP_001093400]	gene	overlapping	0	3.63848	3.5599	-0.243752
NP_001094496.1	4	15248751	15279361	-	NaN	SQLE	ENSSSCG00000005970	squalene monooxygenase [Source:RefSeq peptide;Acc:NP_001094496]	gene	overlapping	0	7.62068	6.39593	4.86213
NP_001098773.1	5	35889682	36061995	+	NaN	MDM2	ENSSSCG00000000488	E3 ubiquitin-protein ligase Mdm2 [Source:RefSeq peptide;Acc:NP_001098773]	gene	overlapping	0	6.5556	6.13201	4.2802
NP_001103643.1	16	55326947	55342003	-	NaN	STC2	ENSSSCG00000016983	stanniocalcin-2 [Source:RefSeq peptide;Acc:NP_001103643]	gene	overlapping	0	3.81814	3.03277	-2.55487
NP_001106154.1	1	125897936	125953413	-	NaN	AQP9	ENSSSCG00000004597	aquaporin-9 [Source:RefSeq peptide;Acc:NP_001106154]	gene	overlapping	0	3.24899	4.31999	-0.238918
NP_001106911.1	13	143848842	143859885	-	NaN	MUC20	ENSSSCG00000011851	mucin-20 [Source:RefSeq peptide;Acc:NP_001106911]	gene	overlapping	0	2.65221	2.8168	5.85344
NP_001116556.1	7	58392583	58406965	-	NaN	BLM	ENSSSCG00000001815	Bloom syndrome protein [Source:RefSeq peptide;Acc:NP_001116556]	gene	overlapping	0	2.11222	1.97849	3.95096
NP_001116576.1	17	66511905	66519788	-	NaN	TH1L	ENSSSCG00000007521	Negative elongation factor D [Source:UniProtKB/Swiss-Prot;Acc:A5GFY4]	gene	overlapping	0	4.94761	4.72249	2.21594
NP_001116693.1	7	65420490	65455601	+	NaN	HEXA	ENSSSCG00000001927	beta-hexosaminidase subunit alpha [Source:RefSeq peptide;Acc:NP_001116693]	gene	overlapping	0	7.14057	6.29473	4.44758
NP_001137167.1	17	43454992	43512752	+	NaN	ACSS2	ENSSSCG00000007286	acetyl-coenzyme A synthetase, cytoplasmic [Source:RefSeq peptide;Acc:NP_001137167]	gene	overlapping	0	5.50591	4.57935	1.90715
NP_001137180.1	X	28789012	28869340	+	NaN	GK	ENSSSCG00000012202	glycerol kinase [Source:RefSeq peptide;Acc:NP_001137180]	gene	overlapping	0	3.23728	3.73202	5.63433
NP_001137401.1	13	179675990	179719567	+	NaN	VGLL3	ENSSSCG00000011998	transcription cofactor vestigial-like protein 3 [Source:RefSeq peptide;Acc:NP_001137401]	gene	overlapping	0	2.76739	2.33411	-2.06356
NP_001155225.1	7	80458471	80468943	-	NaN	PCK2	ENSSSCG00000002009	phosphoenolpyruvate carboxykinase [Source:RefSeq peptide;Acc:NP_001155225]	gene	overlapping	0	4.01173	3.01883	-0.562729
NP_001157585.1	1	156057763	156066216	-	NaN	SELS	ENSSSCG00000004826	selenoprotein S [Source:RefSeq peptide;Acc:NP_001157585]	gene	overlapping	0	2.17846	2.53095	4.2952
NP_001158208.1	16	71949487	71963257	-	NaN	HAVCR1	ENSSSCG00000017061	hepatitis A virus cellular receptor 1 [Source:RefSeq peptide;Acc:NP_001158208]	gene	overlapping	0	8.41736	8.33938	7.05121
NP_001161118.1	X	47619464	47627444	-	NaN	EBP	ENSSSCG00000020738ription=3-beta-hydroxysteroid-Delta(8),Delta(7)-isomerase[Source:RefSeq peptide;Acc:NP_001161118]	No description	gene	overlapping	0	6.13031	6.24071	3.43979
NP_001170960.1	18	11014953	11070159	+	NaN	ZAP	ENSSSCG00000016512	zinc finger CCCH-type antiviral protein 1 [Source:RefSeq peptide;Acc:NP_001170960]	gene	overlapping	0	6.20987	6.23525	4.10276
NP_001172060.1	4	103291798	103304048	-	NaN	FDPS	ENSSSCG00000006512	farnesyl pyrophosphate synthase [Source:RefSeq peptide;Acc:NP_001172060]	gene	overlapping	0	7.74207	6.48286	4.73934
NP_001177099.1	17	9339790	9455277	+	NaN	FAT1	ENSSSCG00000007000	FAT tumor suppressor homolog 1 [Source:RefSeq peptide;Acc:NP_001177099]	gene	overlapping	0	8.89628	8.79954	6.66257
NP_001177123.1	1	286250323	286253598	-	NaN	ATP6V1G1	ENSSSCG00000005491	V-type proton ATPase subunit G 1 [Source:RefSeq peptide;Acc:NP_001177123]	gene	overlapping	0	4.94617	4.64807	2.96962
NP_001177142.1	5	91818173	91826105	-	NaN	SNRPF	ENSSSCG00000000895	small nuclear ribonucleoprotein polypeptide F [Source:RefSeq peptide;Acc:NP_001177142]	gene	overlapping	0	3.84198	4.26625	5.64604
NP_001177144.1	17	53401274	53408962	+	NaN	PTI	ENSSSCG00000007410	pancreatic trypsin inhibitor precursor [Source:RefSeq peptide;Acc:NP_001177144]	gene	overlapping	0	3.33369	2.90334	-1.73023
NP_001177216.1	5	64622527	64631775	+	NaN	GABARAPL1	ENSSSCG00000000645	gamma-aminobutyric acid receptor-associated protein-like 1 [Source:RefSeq peptide;Acc:NP_001177216]	gene	overlapping	0	6.05312	6.11559	2.21722
NP_001182283.1	X	126558348	126582412	-	NaN	MOSPD1	ENSSSCG00000012686	motile sperm domain-containing protein 1 [Source:RefSeq peptide;Acc:NP_001182283]	gene	overlapping	0	6.35054	6.26584	2.86538
NP_001230150.1	3	17136054	17161334	-	NaN	PSPH	ENSSSCG00000007748	phosphoserine phosphatase [Source:RefSeq peptide;Acc:NP_001230150]	gene	overlapping	0	3.26855	3.47976	-0.656098
NP_001230283.1	6	145547688	145582947	+	NaN	DHCR24	ENSSSCG00000027525	24-dehydrocholesterol reductase [Source:RefSeq peptide;Acc:NP_001230283]	gene	overlapping	0	6.96517	6.45313	5.12328
NP_001230355.1	14	53027337	53039882	+	NaN	SNRPD3	ENSSSCG00000010058	small nuclear ribonucleoprotein Sm D3 [Source:RefSeq peptide;Acc:NP_001230355]	gene	overlapping	0	5.49965	5.51828	6.72274
NP_001230400.1	11	5678755	5692527	+	NaN	SLC46A3	ENSSSCG00000009322	solute carrier family 46 member 3 [Source:RefSeq peptide;Acc:NP_001230400]	gene	overlapping	0	6.14611	6.03596	4.44994
NP_001230428.1	13	77875439	77887505	+	NaN	TMEM43	ENSSSCG00000011603	transmembrane protein 43 [Source:HGNC Symbol;Acc:28472]	gene	overlapping	0	3.49906	3.37213	5.17271
NP_001230486.1	14	53232926	53235595	-	NaN	DDT	ENSSSCG00000010063	D-dopachrome decarboxylase [Source:RefSeq peptide;Acc:NP_001230486]	gene	overlapping	0	5.73519	5.06018	3.74424
NP_001230505.1	X	91013922	91037150	-	NaN	BTK	ENSSSCG00000012495	Bruton agammaglobulinemia tyrosine kinase [Source:RefSeq peptide;Acc:NP_001230505]	gene	overlapping	0	3.37827	4.22714	-0.289586
NP_001230543.1	1	183878601	183885296	-	NaN	PIAS1	ENSSSCG00000004958	Uncharacterized protein [Source:UniProtKB/TrEMBL;Acc:F1SJH4]	gene	overlapping	0	7.66084	7.322	5.18105
NP_001230558.1	17	53729012	53736219	+	NaN	NEURL2	ENSSSCG00000007430	Uncharacterized protein [Source:UniProtKB/TrEMBL;Acc:F1SC72]	gene	overlapping	0	5.19728	4.88696	3.55844
NP_001230758.1	7	102193922	102258991	+	NaN	RBM25	ENSSSCG00000028663	RNA binding motif protein 25 [Source:RefSeq peptide;Acc:NP_001230758]	gene	overlapping	0	7.2793	7.13233	8.63429
NP_001230789.1	6	152704065	152709056	-	NaN	TSPAN1	ENSSSCG00000003908	tetraspanin 1 [Source:RefSeq peptide;Acc:NP_001230789]	gene	overlapping	0	4.97172	4.78385	3.05395
NP_001231025.1	X	127896483	127901929	+	NaN	RBMX	ENSSSCG00000012703	heterogeneous nuclear ribonucleoprotein G [Source:RefSeq peptide;Acc:NP_001231025]	gene	overlapping	0	5.48176	5.65647	6.90482
NP_001231084.1	8	76034114	76105880	-	NaN	SCARB2	ENSSSCG00000008980	lysosome membrane protein 2 [Source:RefSeq peptide;Acc:NP_001231084]	gene	overlapping	0	7.69565	7.75947	6.63723
NP_001231092.1	10	37686862	37699607	-	NaN	DNAJA1	ENSSSCG00000011000	dnaJ homolog subfamily A member 1 [Source:RefSeq peptide;Acc:NP_001231092]	gene	overlapping	0	7.04751	6.56759	8.47871
NP_001231160.1	1	188402704	188411403	-	NaN	PNN	ENSSSCG00000022828	pinin [Source:RefSeq peptide;Acc:NP_001231160]	gene	overlapping	0	7.15655	6.80853	8.48115
NP_001231174.1	13	103717654	103747362	-	NaN	SLC33A1	ENSSSCG00000025316	acetyl-coenzyme A transporter 1 [Source:RefSeq peptide;Acc:NP_001231174]	gene	overlapping	0	3.82856	3.90543	0.710414
NP_001231175.1	5	66463609	66473082	-	NaN	C12ORF53	ENSSSCG00000000692	Uncharacterized protein [Source:UniProtKB/TrEMBL;Acc:F1SLT0]	gene	overlapping	0	3.0162	3.37636	4.97117
NP_001231238.1	9	120322753	120388808	+	NaN	EZH2	ENSSSCG00000028840	enhancer of zeste homolog 2 [Source:RefSeq peptide;Acc:NP_001231238]	gene	overlapping	0	3.03143	2.896	4.60777
NP_001231278.1	Y	388424	405535	-	NaN	EIF1AY	ENSSSCG00000029864	eukaryotic translation initiation factor 1A, Y-linked [Source:RefSeq peptide;Acc:NP_001231278]	gene	overlapping	0	4.14746	4.00847	-2.93887
NP_001231356.1	1	284589320	284600766	+	NaN	SLC31A2	ENSSSCG00000023714	probable low affinity copper uptake protein 2 [Source:RefSeq peptide;Acc:NP_001231356]	gene	overlapping	0	3.87364	4.06421	1.52411
NP_001231359.1	2	65177577	65180388	-	NaN	DNAJB1	ENSSSCG00000013784	DnaJ (Hsp40) homolog, subfamily B, member 1 [Source:RefSeq peptide;Acc:NP_001231359]	gene	overlapping	0	3.52462	1.83222	5.65044
NP_001231402.1	1	9168321	9271328	-	NaN	M6P/IGF2R	ENSSSCG00000004044	cation-independent mannose-6-phosphate receptor [Source:RefSeq peptide;Acc:NP_001231402]	gene	overlapping	0	6.21565	6.11655	3.78266
NP_001231428.1	12	2630957	2633535	+	NaN	CBX8	ENSSSCG00000017161	chromobox protein homolog 8 [Source:RefSeq peptide;Acc:NP_001231428]	gene	overlapping	0	-3.05222	-2.50497	0.363533
NP_001231431.1	1	97745079	97758955	+	NaN	HMGN3	ENSSSCG00000004470	high mobility group nucleosome-binding domain-containing protein 3 [Source:RefSeq peptide;Acc:NP_001231431]	gene	overlapping	0	2.50898	1.80342	-2.93887
NP_001231558.1	5	61337116	61373313	-	NaN	PLBD1	ENSSSCG00000027602	phospholipase B-like 1 [Source:RefSeq peptide;Acc:NP_001231558]	gene	overlapping	0	2.09507	2.19016	-2.11423
NP_998923.1	5	66749072	66773949	+	NaN	SCNN1A	ENSSSCG00000000707	amiloride-sensitive sodium channel subunit alpha [Source:RefSeq peptide;Acc:NP_998923]	gene	overlapping	0	3.23286	2.80726	-2.17087
NP_998981.1	2	69431462	69556700	+	NaN	ICAM1	ENSSSCG00000013655	intercellular adhesion molecule-1 [Source:RefSeq peptide;Acc:NP_998981]	gene	overlapping	0	3.91696	2.87243	-1.59188
NP_999036.1	17	53374381	53383481	-	NaN	UPTI	ENSSSCG00000020659	uterine plasmin/trypsin inhibitor precursor [Source:RefSeq peptide;Acc:NP_999036]	gene	overlapping	0	6.51652	6.09382	2.12807
NP_999504.1	7	53214360	53228751	-	NaN	DNAJA4	ENSSSCG00000001759	dnaJ homolog subfamily A member 4 [Source:RefSeq peptide;Acc:NP_999504]	gene	overlapping	0	-0.699253	-1.11948	3.98376
NP_999512.1	11	74889142	74924577	-	NaN	SLC15A1	ENSSSCG00000009513	solute carrier family 15 member 1 [Source:RefSeq peptide;Acc:NP_999512]	gene	overlapping	0	1.43458	2.62943	5.56684
NP_999514.1	2	4604883	4609731	+	NaN	PC	ENSSSCG00000012926	pyruvate carboxylase, mitochondrial [Source:RefSeq peptide;Acc:NP_999514]	gene	overlapping	0	3.52919	3.33527	0.939766
NPC1_PIG	6	101001949	101049509	-	NaN	C18ORF8	ENSSSCG00000030591	Uncharacterized protein [Source:UniProtKB/TrEMBL;Acc:F1SBB6]	gene	overlapping	0	7.36872	7.27784	5.82145
NPC2_PIG	7	103573074	103582623	-	NaN	NPC2	ENSSSCG00000002366	Epididymal secretory protein E1 [Source:UniProtKB/Swiss-Prot;Acc:O97763]	gene	overlapping	0	9.85146	9.84712	8.41413
NPM1	16	56963967	56978495	-	NaN	NPM1	ENSSSCG00000016998	Uncharacterized protein [Source:UniProtKB/TrEMBL;Acc:F1RRY2]	gene	overlapping	0	9.89591	9.74449	11.005
OPTN_PIG	10	77690723	77740523	-	NaN	OPTN	ENSSSCG00000023247	Optineurin [Source:UniProtKB/Swiss-Prot;Acc:Q7YS99]	gene	overlapping	0	6.0423	5.3854	4.02643
PACSIN2	5	3320873	3358774	+	NaN	PACSIN2	ENSSSCG00000000036	Uncharacterized protein [Source:UniProtKB/TrEMBL;Acc:F1SJR5]	gene	overlapping	0	6.20422	5.90062	4.95898
PAGE4	X	48525547	48528303	-	NaN	PAGE4	ENSSSCG00000012303	Uncharacterized protein [Source:UniProtKB/TrEMBL;Acc:F1RW24]	gene	overlapping	0	3.91063	3.42132	-0.127777
PARD6G	1	309824502	309954689	+	NaN	PARD6G	ENSSSCG00000023376	Uncharacterized protein [Source:UniProtKB/TrEMBL;Acc:F1RZB2]	gene	overlapping	0	2.0595	0.845768	-2.88821
PC11X_PIG	X	94394186	94472133	-	NaN	PCDH11X	ENSSSCG00000029771	Protocadherin-11 X-linked [Source:UniProtKB/Swiss-Prot;Acc:Q6KEQ9]	gene	overlapping	0	-2.66822	0.163183	3.32798
PGP3	9	102544383	102626450	+	NaN	PGP3	ENSSSCG00000015390	Uncharacterized protein [Source:UniProtKB/TrEMBL;Acc:F1SBY9]	gene	overlapping	0	5.52624	4.31245	-0.163416
PHKA1	X	66183818	66288138	+	NaN	PHKA1	ENSSSCG00000012411	Uncharacterized protein [Source:UniProtKB/TrEMBL;Acc:F1RPM0]	gene	overlapping	0	4.17741	3.9554	1.72208
PIK3CB	13	87095136	87176240	-	NaN	PIK3CB	ENSSSCG00000021203	phosphoinositide-3-kinase, catalytic, beta polypeptide [Source:HGNC Symbol;Acc:8976]	gene	overlapping	0	5.39892	4.80508	3.55227
PKM2	7	65549984	65575391	+	NaN	PKM2	ENSSSCG00000001930	Pyruvate kinase [Source:UniProtKB/TrEMBL;Acc:F1SHL7]	gene	overlapping	0	4.44464	3.52272	5.71651
PLBD2	14	40832763	40852634	+	NaN	PLBD2	ENSSSCG00000009872	Uncharacterized protein [Source:UniProtKB/TrEMBL;Acc:F1RKC7]	gene	overlapping	0	2.01704	1.87864	-2.17087
PLEKHM1	12	18150896	18202133	+	NaN	PLEKHM1	ENSSSCG00000017325	Uncharacterized protein [Source:UniProtKB/TrEMBL;Acc:F1RRQ5]	gene	overlapping	0	5.53586	4.66446	2.65408
PLIN2_PIG	1	227334093	227344720	+	NaN	ADFP	ENSSSCG00000005171	Perilipin-2 [Source:UniProtKB/Swiss-Prot;Acc:Q4PLW0]	gene	overlapping	0	8.96473	9.07192	7.65365
PLS1	13	91167191	91246263	+	NaN	PLS1	ENSSSCG00000011680	Uncharacterized protein [Source:UniProtKB/TrEMBL;Acc:F1SKF1]	gene	overlapping	0	3.63237	3.26469	-0.396896
POLR2K	4	39764915	39768384	-	NaN	POLR2K	ENSSSCG00000021180	Uncharacterized protein [Source:UniProtKB/TrEMBL;Acc:F1RNP9]	gene	overlapping	0	3.02807	2.75962	4.61028
PPP1R39	2	153801404	153932628	+	NaN	PPP1R39	ENSSSCG00000014410	Uncharacterized protein [Source:UniProtKB/TrEMBL;Acc:F1RM16]	gene	overlapping	0	2.45803	1.98025	-2.93887
PPP1R3C	14	112652687	112657270	-	NaN	PPP1R3C	ENSSSCG00000010464	Uncharacterized protein [Source:UniProtKB/TrEMBL;Acc:F1SCX0]	gene	overlapping	0	5.19223	3.98214	-0.925216
PRAP1	14	153794853	153798758	-	NaN	PRAP1	ENSSSCG00000010792	Uncharacterized protein [Source:UniProtKB/TrEMBL;Acc:F1SAB9]	gene	overlapping	0	7.49521	6.50297	2.28729
PRPF38B	4	121836332	121846084	-	NaN	PRPF38B	ENSSSCG00000006845	Uncharacterized protein [Source:UniProtKB/TrEMBL;Acc:F1S580]	gene	overlapping	0	6.96263	6.01186	8.02126
PSAP	14	80625273	80660663	-	NaN	PSAP	ENSSSCG00000010281	Saposin-B-Val Saposin-B [Source:UniProtKB/Swiss-Prot;Acc:P81405]	gene	overlapping	0	10.9399	11.2852	8.65012
PSAT1	1	257809815	257834732	+	NaN	PSAT1	ENSSSCG00000005287	phosphoserine aminotransferase 1 [Source:HGNC Symbol;Acc:19129]	gene	overlapping	0	2.39859	1.99789	-2.88821
PSRC1	4	121297758	121301374	-	NaN	PSRC1	ENSSSCG00000006832	Uncharacterized protein [Source:UniProtKB/TrEMBL;Acc:F1S5Z6]	gene	overlapping	0	4.5889	4.2767	0.745752
PTK2B	14	12242679	12374362	+	NaN	PTK2B	ENSSSCG00000009664	Uncharacterized protein [Source:UniProtKB/TrEMBL;Acc:F1RJS6]	gene	overlapping	0	5.37781	5.17768	3.27539
PTPN13	8	141369845	141583918	-	NaN	PTPN13	ENSSSCG00000026655	protein tyrosine phosphatase, non-receptor type 13 (APO-1/CD95 (Fas)-associated phosphatase) [Source:HGNC Symbol;Acc:9646]	gene	overlapping	0	6.50779	5.97389	4.00794
QOR_PIG	6	128304889	128327585	+	NaN	CRYZ	ENSSSCG00000003780	Quinone oxidoreductase [Source:UniProtKB/Swiss-Prot;Acc:Q0MVN8]	gene	overlapping	0	5.07046	5.04293	3.55321
RASN_PIG	4	116034666	116042522	+	NaN	NRAS	ENSSSCG00000006753	GTPase NRas [Source:UniProtKB/Swiss-Prot;Acc:Q2MJK3]	gene	overlapping	0	6.23601	5.91448	4.5025
RBM10	X	46808863	46820425	-	NaN	RBM10	ENSSSCG00000012271	Uncharacterized protein [Source:UniProtKB/TrEMBL;Acc:F1RWX6]	gene	overlapping	0	4.08654	3.92568	5.60012
RBM17	10	70943162	70964953	-	NaN	RBM17	ENSSSCG00000011134	Uncharacterized protein [Source:UniProtKB/TrEMBL;Acc:F1RUL1]	gene	overlapping	0	3.96489	4.26703	6.03075
RCBTB1	11	18464851	18512551	+	NaN	RCBTB1	ENSSSCG00000021060	regulator of chromosome condensation (RCC1) and BTB (POZ) domain containing protein 1 [Source:HGNC Symbol;Acc:18243]	gene	overlapping	0	6.61902	5.15255	3.01151
RCC1	6	79360235	79380216	+	NaN	RCC1	ENSSSCG00000029097	regulator of chromosome condensation 1 [Source:HGNC Symbol;Acc:1913]	gene	overlapping	0	3.85198	4.37501	5.80797
RENBP_PIG	X	142227781	142235348	-	NaN	RENBP	ENSSSCG00000012792	N-acylglucosamine 2-epimerase [Source:UniProtKB/Swiss-Prot;Acc:P17560]	gene	overlapping	0	4.74694	4.36856	1.5474
RFFL	12	41690124	41712782	+	NaN	RFFL	ENSSSCG00000026646	ring finger and FYVE-like domain containing E3 ubiquitin protein ligase [Source:HGNC Symbol;Acc:24821]	gene	overlapping	0	4.40529	3.77974	1.6179
RFX7	1	128274903	128288834	+	NaN	RFX7	ENSSSCG00000004603	Uncharacterized protein [Source:UniProtKB/TrEMBL;Acc:F1RZF6]	gene	overlapping	0	3.6767	3.56587	0.0747836
RNF103	3	60919505	60941790	+	NaN	RNF103	ENSSSCG00000008218	Uncharacterized protein [Source:UniProtKB/TrEMBL;Acc:F1SVD1]	gene	overlapping	0	3.01008	3.13651	-0.817907
RPL22L1	13	118437979	118499704	-	NaN	RPL22L1	ENSSSCG00000027441	ribosomal protein L22-like 1 [Source:HGNC Symbol;Acc:27610]	gene	overlapping	0	2.38833	3.13865	5.72142
RSL24D1	1	129149990	129169275	+	NaN	RSL24D1	ENSSSCG00000024983	Uncharacterized protein [Source:UniProtKB/TrEMBL;Acc:F1RZD9]	gene	overlapping	0	4.12465	3.45259	5.32487
RSRC2	14	31859246	31877940	+	NaN	RSRC2	ENSSSCG00000009791	Uncharacterized protein [Source:UniProtKB/TrEMBL;Acc:F1REW7]	gene	overlapping	0	5.82163	5.60999	7.02303
S10AB_PIG	4	106198265	106199434	+	NaN	S100A11	ENSSSCG00000006610	Protein S100-A11 [Source:UniProtKB/Swiss-Prot;Acc:P31950]	gene	overlapping	0	6.69859	6.24026	3.19518
SAMD4A	1	204436515	204645216	+	NaN	SAMD4A	ENSSSCG00000023408	Uncharacterized protein [Source:UniProtKB/TrEMBL;Acc:F1SFD4]	gene	overlapping	0	3.28751	0.311822	-2.93887
SERA_PIG	4	111436317	111468486	-	NaN	PHGDH	ENSSSCG00000006717	D-3-phosphoglycerate dehydrogenase [Source:UniProtKB/Swiss-Prot;Acc:A5GFY8]	gene	overlapping	0	4.83421	3.70127	-2.93887
SERBP1	6	134068990	134081998	+	NaN	SERBP1	ENSSSCG00000003798	Uncharacterized protein [Source:UniProtKB/TrEMBL;Acc:F1S827]	gene	overlapping	0	8.30709	8.13046	9.34909
SF3A3	6	86722220	86747074	-	NaN	SF3A3	ENSSSCG00000003643	Uncharacterized protein [Source:UniProtKB/TrEMBL;Acc:F1SV40]	gene	overlapping	0	4.85067	4.15898	6.04406
SGPL1	14	79591564	79629916	+	NaN	SGPL1	ENSSSCG00000010274	Uncharacterized protein [Source:UniProtKB/TrEMBL;Acc:F1SUB2]	gene	overlapping	0	7.60219	7.59073	5.61595
SLC25A4	15	52922448	52926945	+	NaN	SLC25A4	ENSSSCG00000015790	Uncharacterized protein [Source:UniProtKB/TrEMBL;Acc:F1RZQ6]	gene	overlapping	0	1.83515	2.10755	4.0967
SLC2A3	5	65800934	65810886	+	NaN	SLC2A3	ENSSSCG00000022925	Solute carrier family 2 member 3 [Source:UniProtKB/TrEMBL;Acc:B6C6Q5]	gene	overlapping	0	6.13673	6.07956	2.59553
SLC5A7	3	50165865	50189368	-	NaN	SLC5A7	ENSSSCG00000008140	Uncharacterized protein [Source:UniProtKB/TrEMBL;Acc:F1SU25]	gene	overlapping	0	5.11576	3.21378	-2.45354
SMARCA1	X	121756240	121832582	-	NaN	SMARCA1	ENSSSCG00000012649	Uncharacterized protein [Source:UniProtKB/TrEMBL;Acc:F1RTI9]	gene	overlapping	0	3.06376	2.90674	-0.418409
SNAP91	1	92839196	92949976	+	NaN	SNAP91	ENSSSCG00000004453	Uncharacterized protein [Source:UniProtKB/TrEMBL;Acc:F1RQM6]	gene	overlapping	0	3.03288	2.18258	-1.5042
SNX9	1	11253580	11319029	-	NaN	SNX9	ENSSSCG00000030535	sorting nexin 9 [Source:HGNC Symbol;Acc:14973]	gene	overlapping	0	1.12137	1.52712	-2.93887
SPAG1	4	39668745	39686887	-	NaN	SPAG1	ENSSSCG00000006067	Sperm associated antigen 1 [Source:UniProtKB/TrEMBL;Acc:B0FTP8]	gene	overlapping	0	5.66445	5.33075	3.80063
STK10	16	56725289	56743147	-	NaN	STK10	ENSSSCG00000022478	serine/threonine kinase 10 [Source:HGNC Symbol;Acc:11388]	gene	overlapping	0	5.28165	4.91005	3.61676
STMN1_PIG	6	76928474	76934104	+	NaN	ENSSSCG00000024625	ENSSSCG00000024625	No description	gene	overlapping	0	4.38264	5.02831	7.54743
SUSD4	10	21915004	22050197	-	NaN	SUSD4	ENSSSCG00000010886	sushi domain containing 4 [Source:HGNC Symbol;Acc:25470]	gene	overlapping	0	4.10299	4.355	-0.535241
SYNE2	1	215794612	216064625	-	NaN	SYNE2	ENSSSCG00000005110	spectrin repeat containing, nuclear envelope 2 [Source:HGNC Symbol;Acc:17084]	gene	overlapping	0	3.42543	4.05275	0.515426
TACSTD2	6	141453750	141454721	+	NaN	TACSTD2	ENSSSCG00000003832	Uncharacterized protein [Source:UniProtKB/TrEMBL;Acc:F1S7A4]	gene	overlapping	0	4.84912	3.55305	-0.484574
TBA1B_PIG	5	15556615	15560006	-	NaN	TUBA1A	ENSSSCG00000000193	Tubulin alpha-1A chain [Source:UniProtKB/Swiss-Prot;Acc:P02550]	gene	overlapping	0	9.69894	9.38132	10.8683
TBC1D1	8	30793179	30793670	+	NaN	TBC1D1	ENSSSCG00000027836	TBC1 (Tre-2/USP6, BUB2, cdc16) domain family, member 1; TBC1 (Tre-2/USP6, BUB2, cdc16) domain family,member 1 [Source:UniProtKB/TrEMBL;Acc:D2EAC1]	gene	overlapping	0	0.0503687	0.351966	-2.93887
TBC1D20	17	39585740	39589979	-	NaN	TRIB3	ENSSSCG00000007208	Uncharacterized protein [Source:UniProtKB/TrEMBL;Acc:F1S7J1]	gene	overlapping	0	4.42971	3.07781	0.326413
TBC1D8	3	55777081	55834903	+	NaN	RPL31	ENSSSCG00000008170	60S ribosomal protein L31 [Source:UniProtKB/Swiss-Prot;Acc:P62901]	gene	overlapping	0	2.67494	2.47422	-0.622919
TDGF1	13	32774190	32777033	+	NaN	TDGF1	ENSSSCG00000023395	teratocarcinoma-derived growth factor 1 [Source:HGNC Symbol;Acc:11701]	gene	overlapping	0	5.67176	4.64409	2.58948
TES_PIG	18	31991911	32014016	-	NaN	TES	ENSSSCG00000016636	Testin [Source:UniProtKB/Swiss-Prot;Acc:Q2QLE3]	gene	overlapping	0	6.83477	6.62474	5.63988
TFAP2A	7	7533348	7547226	-	NaN	TFAP2A	ENSSSCG00000001036	Uncharacterized protein [Source:UniProtKB/TrEMBL;Acc:F1RV96]	gene	overlapping	0	6.85209	6.52066	4.83406
TJP3	2	75529575	75562894	-	NaN	TJP3	ENSSSCG00000013491	Uncharacterized protein [Source:UniProtKB/TrEMBL;Acc:F1S7Q6]	gene	overlapping	0	5.11587	3.57157	1.20556
TMEM63B	7	44955831	44982520	+	NaN	TMEM63B	ENSSSCG00000001697	Uncharacterized protein [Source:UniProtKB/TrEMBL;Acc:F1RQV6]	gene	overlapping	0	5.38529	4.20985	2.2564
TMEM70	4	67664540	67671778	-	NaN	TMEM70	ENSSSCG00000021628	transmembrane protein 70 [Source:HGNC Symbol;Acc:26050]	gene	overlapping	0	1.66428	1.69013	3.97282
TNFSF9	2	73102077	73106168	+	NaN	TNFSF9	ENSSSCG00000022370	Uncharacterized protein [Source:UniProtKB/TrEMBL;Acc:F1SBT1]	gene	overlapping	0	4.01616	3.78065	-0.112748
TNNC1_PIG	13	37805313	37808062	-	NaN	TNNC1	ENSSSCG00000011441	Troponin C, slow skeletal and cardiac muscles [Source:UniProtKB/Swiss-Prot;Acc:P63317]	gene	overlapping	0	2.59614	1.27049	-2.88821
TNR1A_PIG	5	66780726	66793255	+	NaN	TNFRSF1A	ENSSSCG00000000708	Tumor necrosis factor receptor superfamily member 1A [Source:UniProtKB/Swiss-Prot;Acc:P50555]	gene	overlapping	0	6.07572	5.40235	2.00626
TNR6_PIG	14	109911728	109939573	+	NaN	FAS	ENSSSCG00000010448	Tumor necrosis factor receptor superfamily member 6 [Source:UniProtKB/Swiss-Prot;Acc:O77736]	gene	overlapping	0	5.17039	4.43646	-0.925216
TP53INP1	4	45000113	45019079	+	NaN	TP53INP1	ENSSSCG00000023609	Uncharacterized protein [Source:UniProtKB/TrEMBL;Acc:F1RY57]	gene	overlapping	0	6.54854	6.45597	1.93377
TPM1_PIG	1	120217106	120240145	-	NaN	TPM1	ENSSSCG00000004570	Tropomyosin alpha-1 chain [Source:UniProtKB/Swiss-Prot;Acc:P42639]	gene	overlapping	0	6.31236	5.7995	7.8404
TPP1	9	3792870	3800652	+	NaN	TPP1	ENSSSCG00000023080	tripeptidyl peptidase I [Source:HGNC Symbol;Acc:2073]	gene	overlapping	0	6.40668	5.22979	2.65891
TUBA3C	14	54042931	54049671	-	NaN	TUBA3C	ENSSSCG00000010099	tubulin, alpha 3c [Source:HGNC Symbol;Acc:12408]	gene	overlapping	0	-0.699253	0.501119	4.11351
TXNIP_PIG	4	108991306	108995645	+	NaN	TXNIP	ENSSSCG00000006681	Thioredoxin-interacting protein [Source:UniProtKB/Swiss-Prot;Acc:Q2HY40]	gene	overlapping	0	3.22787	4.51914	-0.0590747
TYSND1	14	78996429	79008539	-	NaN	TYSND1	ENSSSCG00000010259	trypsin domain containing 1 [Source:HGNC Symbol;Acc:28531]	gene	overlapping	0	3.52387	3.63934	0.49076
UBL4A	X	143575770	143578348	+	NaN	UBL4A	ENSSSCG00000021972	ubiquitin-like 4A [Source:HGNC Symbol;Acc:12505]	gene	overlapping	0	2.06276	1.59094	4.42803
USP48	6	73868350	73879329	-	NaN	USP48	ENSSSCG00000003516	Uncharacterized protein [Source:UniProtKB/TrEMBL;Acc:F1SU01]	gene	overlapping	0	4.12781	4.60527	6.07943
USP9Y	Y	502882	660050	-	NaN	USP9Y	ENSSSCG00000027046	ubiquitin specific peptidase 9, Y-linked [Source:HGNC Symbol;Acc:12633]	gene	overlapping	0	5.28551	5.2388	-0.925216
UTRN	1	22999275	23103417	-	NaN	UTRN	ENSSSCG00000004123	Uncharacterized protein [Source:UniProtKB/TrEMBL;Acc:F1S733]	gene	overlapping	0	6.88398	6.49201	4.73861
VAT1	12	20002991	20010796	-	NaN	VAT1	ENSSSCG00000024059	vesicle amine transport protein 1 homolog (T. californica) [Source:HGNC Symbol;Acc:16919]	gene	overlapping	0	6.5869	5.1612	1.67849
WARS	7	128677827	128702925	-	NaN	WARS	ENSSSCG00000002516	tryptophanyl-tRNA synthetase [Source:HGNC Symbol;Acc:12729]	gene	overlapping	0	4.92257	4.15006	1.8331
WDR72	1	130775015	130860021	+	NaN	WDR72	ENSSSCG00000004615	Uncharacterized protein [Source:UniProtKB/TrEMBL;Acc:F1RZD7]	gene	overlapping	0	2.38	1.65078	-2.5042
XRCC2	18	4937318	5046534	+	NaN	XRCC2	ENSSSCG00000016427	Uncharacterized protein [Source:UniProtKB/TrEMBL;Acc:F1SSP5]	gene	overlapping	0	0.824345	-1.78763	2.97109
ZBED6	9	70869462	70872407	+	NaN	ZBED6	ENSSSCG00000015274	Uncharacterized protein [Source:UniProtKB/TrEMBL;Acc:F1S6B2]	gene	overlapping	0	5.03045	4.56148	3.1738
ZBTB44	9	63071808	63136385	+	NaN	ZBTB44	ENSSSCG00000015247	Uncharacterized protein [Source:UniProtKB/TrEMBL;Acc:F1S6D5]	gene	overlapping	0	6.06261	5.80624	3.50402
ZFAND2A	3	873366	879193	-	NaN	ZFAND2A	ENSSSCG00000007554	Uncharacterized protein [Source:UniProtKB/TrEMBL;Acc:F1RIW7]	gene	overlapping	0	2.25489	1.71574	4.48734
ZFX_PIG	Y	1324376	1383421	+	NaN	ZFX	ENSSSCG00000012179	Zinc finger X-chromosomal protein [Source:UniProtKB/Swiss-Prot;Acc:P80944]	gene	overlapping	0	3.80276	3.30425	-2.93887
ZFYVE26	7	97825802	97898510	-	NaN	ZFYVE26	ENSSSCG00000002298	Uncharacterized protein [Source:UniProtKB/TrEMBL;Acc:F1SA22]	gene	overlapping	0	5.93807	5.2517	2.72777
ZIC3	X	128552010	128557446	+	NaN	ZIC3	ENSSSCG00000012705	Uncharacterized protein [Source:UniProtKB/TrEMBL;Acc:F1RQ88]	gene	overlapping	0	0.881402	-0.503484	3.18804
ZMAT3	13	126270158	126274030	+	NaN	ZMAT3	ENSSSCG00000028230	zinc finger, matrin-type 3 [Source:HGNC Symbol;Acc:29983]	gene	overlapping	0	6.34613	5.92333	1.9245
ZNF207	12	44345121	44362552	-	NaN	ZNF207	ENSSSCG00000017732	zinc finger protein 207 [Source:HGNC Symbol;Acc:12998]	gene	overlapping	0	5.62315	5.9303	7.01301

## Sheet: 7 DEGs exclusive NaturIVF
Probe	Chromosome	Start	End	Strand	No value	Feature	ID	Description	Type	Orientation	Distance	C-IVF	Natur-IVF	In vivo
AK3	1	243072943	243098761	+	NaN	AK3	ENSSSCG00000023595	Uncharacterized protein [Source:UniProtKB/TrEMBL;Acc:F1SK45]	gene	overlapping	0	-2.0151	3.25862	-1.83754
DHX40	12	36623479	36670447	-	NaN	DHX40	ENSSSCG00000017665	Uncharacterized protein [Source:UniProtKB/TrEMBL;Acc:F1S235]	gene	overlapping	0	2.63371	4.61412	2.6912
FEM1C	2	124628609	124644415	-	NaN	FEM1C	ENSSSCG00000014217	Uncharacterized protein [Source:UniProtKB/TrEMBL;Acc:F1RLE6]	gene	overlapping	0	2.78026	4.61647	2.47576
HSPA12A	14	138170746	138246086	-	NaN	HSPA12A	ENSSSCG00000010662	Uncharacterized protein [Source:UniProtKB/TrEMBL;Acc:F1S4S5]	gene	overlapping	0	-0.803234	4.05636	-1.23509
MPRB_PIG	7	52635491	52682127	+	NaN	PAQR8	ENSSSCG00000001750	Membrane progestin receptor beta [Source:UniProtKB/Swiss-Prot;Acc:Q865K9]	gene	overlapping	0	-1.75589	2.15827	-2.88821
NP_001157273.1	8	59064675	59139438	-	NaN	POLR2B	ENSSSCG00000022955	polymerase (RNA) II (DNA directed) polypeptide B, 140kDa [Source:HGNC Symbol;Acc:9188]	gene	overlapping	0	0.497216	3.944	2.12975
UGCG	1	283440944	283479545	+	NaN	UGCG	ENSSSCG00000022780	Uncharacterized protein [Source:UniProtKB/TrEMBL;Acc:F1SNB1]	gene	overlapping	0	3.55846	5.581	3.68224

## Sheet: 13 DEGs exclusive C-IVF 
Probe	Chromosome	Start	End	Strand	No value	Feature	ID	Description	Type	Orientation	Distance	C-IVF	Natur-IVF	In vivo	log2FC=log2(Control)-log2(In vivo)	FC=2^log2FC	FC(log)=-1/value if value is <0 and >1
ACAT1	9	40601622	40622159	+	NaN	ACAT1	ENSSSCG00000026153	acetyl-CoA acetyltransferase 1 [Source:HGNC Symbol;Acc:93]	gene	overlapping	0	7.68896	6.11376	6.16801	1.52096	2.86981
C8ORF37 157657	4	44707161	44728142	-	NaN	C8ORF37	ENSSSCG00000006092	Uncharacterized protein [Source:UniProtKB/TrEMBL;Acc:F1RY59]	gene	overlapping	0	1.63467	-2.30222	-2.26373	3.89841	14.912
ENSSSCG00000015902	15	79683636	79795742	-	NaN	ENSSSCG00000015902	ENSSSCG00000015902	No description	gene	overlapping	0	6.80406	5.02129	5.57124	1.23282	2.35026
ISOC1	2	137198380	137219941	+	NaN	ISOC1	ENSSSCG00000014258	Uncharacterized protein [Source:UniProtKB/TrEMBL;Acc:F1RKJ9]	gene	overlapping	0	1.42119	3.90981	3.98532	-2.56413	0.169091	-5.91398
KIF4A	X	63514729	63642348	+	NaN	ENSSSCG00000012377	ENSSSCG00000012377	Uncharacterized protein [Source:UniProtKB/TrEMBL;Acc:F1RTL0]	gene	overlapping	0	4.19787	6.39167	7.18679	-2.98891	0.125964	-7.93876
KIT_PIG	8	43550236	43602062	+	NaN	KIT	ENSSSCG00000008842	Mast/stem cell growth factor receptor Kit [Source:UniProtKB/Swiss-Prot;Acc:Q2HWD6]	gene	overlapping	0	-2.23005	2.40281	3.52952	-5.75957	0.0184585	-54.1755
MPP6	18	52549880	52661454	-	NaN	MPP6	ENSSSCG00000016717	Uncharacterized protein [Source:UniProtKB/TrEMBL;Acc:F1ST93]	gene	overlapping	0	-2.99805	1.59272	1.57571	-4.57376	0.0419914	-23.8144
MTA3	3	103781462	103822042	+	NaN	MTA3	ENSSSCG00000008464	metastasis associated 1 family, member 3 [Source:HGNC Symbol;Acc:23784]	gene	overlapping	0	-0.122739	3.19032	3.42746	-3.5502	0.0853655	-11.7143
MYL9_PIG	17	45264861	45272225	+	NaN	MYL9	ENSSSCG00000024230	Myosin regulatory light polypeptide 9 [Source:UniProtKB/Swiss-Prot;Acc:P29269]	gene	overlapping	0	5.34163	3.26303	3.24983	2.0918	4.26279
NTRK3_PIG	1	212938361	213258768	+	NaN	NTRK3	ENSSSCG00000005106	NT-3 growth factor receptor [Source:UniProtKB/Swiss-Prot;Acc:P24786]	gene	overlapping	0	4.29225	0.901386	0.0892335	4.20302	18.4177
PTPN14	9	142083587	142135830	+	NaN	PTPN14	ENSSSCG00000015582	Uncharacterized protein [Source:UniProtKB/TrEMBL;Acc:F1S2Y4]	gene	overlapping	0	4.51697	1.85072	2.51098	2.006	4.01667
UBR2	7	43111914	43215461	+	NaN	UBR2	ENSSSCG00000001641	Uncharacterized protein [Source:UniProtKB/TrEMBL;Acc:F1RUT9]	gene	overlapping	0	1.65257	4.81723	4.51191	-2.85934	0.137801	-7.25685
UHRF1BP1	7	35474279	35538654	+	NaN	UHRF1BP1	ENSSSCG00000001532	Uncharacterized protein [Source:UniProtKB/TrEMBL;Acc:F1RZ15]	gene	overlapping	0	3.09859	-1.15022	-1.66128	4.75987	27.0935
