# Supplementary material for: DNA methylation and gene expression changes derived from assisted reproductive technologies can be decreased by reproductive fluids
Source: eLife. 2017 Feb 1;6:e23670. doi: 10.7554/eLife.23670 (PMC5340525; doi:10.7554/eLife.23670)
Supplement: Figure 5—source data 1. — This data relates to Figure 5B. DOI: http://dx.doi.org/10.7554/eLife.23670.013 [file elife-23670-fig5-data1.xlsx]

## Sheet: DMRs C-IVF vs Natur-IVF
Probe	Chromosome	Start	End	Q-value	Feature	ID	Description	Type	Orientation	C-IVF	Natur-IVF
Chr15:154719640-154721537	15	154719640	154721537	0.028261414	37500	ENSSSCG00000016370	septin 2 [Source:RefSeq peptide;Acc:NP_001230722]	gene	overlapping	18.202	33.8614	-15.6594
Chr18:41984460-41996315	18	41984460	41996315	0.028261414	39326	ENSSSCG00000016661	septin 7 [Source:HGNC Symbol;Acc:1717]	gene	overlapping	27.1404	11.0776	16.0627
Chr2:156475031-156478618	2	156475031	156478618	0.028261414	5-HT4R	ENSSSCG00000014428	5-hydroxytryptamine receptor 4 [Source:UniProtKB/Swiss-Prot;Acc:Q29006]	gene	overlapping	10.684	21.4563	-10.7723
Chr16:59574339-59577510	16	59574339	59577510	0.028261414	5S_rRNA	ENSSSCG00000020443	5S ribosomal RNA [Source:RFAM;Acc:RF00001]	gene	downstream	13.5571	3.66667	9.89047
Chr13:27383468-27396634	13	27383468	27396634	0.028261414	7SK	ENSSSCG00000018896	7SK RNA [Source:RFAM;Acc:RF00100]	gene	overlapping	13.0893	23.0584	-9.96911
Chr7:45173753-45176136	7	45173753	45176136	0.028261414	AARS2	ENSSSCG00000001706	Uncharacterized protein [Source:UniProtKB/TrEMBL;Acc:F1RQT7]	gene	overlapping	29.5921	15.1576	14.4345
Chr18:26602814-26609093	18	26602814	26609093	0.028261414	AASS	ENSSSCG00000016613	Uncharacterized protein [Source:UniProtKB/TrEMBL;Acc:F1SLX5]	gene	overlapping	26.7594	14.6759	12.0835
Chr3:34641344-34643845	3	34641344	34643845	0.035614084	ABAT	ENSSSCG00000007909	4-aminobutyrate aminotransferase, mitochondrial [Source:UniProtKB/Swiss-Prot;Acc:P80147]	gene	overlapping	22.6461	8.84478	13.8013
Chr4:134912109-134921990	4	134912109	134921990	0.028261414	ABCA4	ENSSSCG00000006890	Uncharacterized protein [Source:UniProtKB/TrEMBL;Acc:F1S539]	gene	overlapping	21.3371	11.9905	9.34668
Chr3:29152145-29155287	3	29152145	29155287	0.028261414	ABCC1	ENSSSCG00000007874	Uncharacterized protein [Source:UniProtKB/TrEMBL;Acc:F1RLT0]	gene	overlapping	2.95007	13.8264	-10.8763
Chr5:54909284-54917943	5	54909284	54917943	0.049430445	ABCC9	ENSSSCG00000000571	Uncharacterized protein [Source:UniProtKB/TrEMBL;Acc:F1SR11]	gene	overlapping	18.8335	7.41331	11.4202
Chr12:25369831-25373111	12	25369831	25373111	0.028261414	ABI3	ENSSSCG00000027677	ABI family, member 3 [Source:HGNC Symbol;Acc:29859]	gene	overlapping	7.02082	16.8744	-9.85354
Chr8:4216237-4221038	8	4216237	4221038	0.028865522	ABLIM2	ENSSSCG00000008721	actin binding LIM protein family, member 2 [Source:HGNC Symbol;Acc:19195]	gene	overlapping	13.3702	28.8216	-15.4514
Chr2:157100293-157102557	2	157100293	157102557	0.028261414	ABLIM3	ENSSSCG00000014430	Uncharacterized protein [Source:UniProtKB/TrEMBL;Acc:F1RLA7]	gene	overlapping	11.1227	25.1209	-13.9982
Chr12:48989034-48993833	12	48989034	48993833	0.028261414	ABR	ENSSSCG00000017804	active BCR-related [Source:HGNC Symbol;Acc:81]	gene	overlapping	27.4496	13.1813	14.2683
Chr2:29099476-29103319	2	29099476	29103319	0.028261414	ABTB2	ENSSSCG00000013303	Uncharacterized protein [Source:UniProtKB/TrEMBL;Acc:F1SGS8]	gene	overlapping	19.5741	7.38877	12.1853
Chr14:44205847-44209713	14	44205847	44209713	0.037769113	ACACB	ENSSSCG00000009937	acetyl-CoA carboxylase 2 [Source:RefSeq peptide;Acc:NP_001193328]	gene	overlapping	23.9198	12.3224	11.5973
Chr7:59482802-59485690	7	59482802	59485690	0.028261414	ACAN	ENSSSCG00000001832	aggrecan core protein [Source:RefSeq peptide;Acc:NP_001158124]	gene	overlapping	16.1608	4.72254	11.4383
Chr8:46660508-46679253	8	46660508	46679253	0.034412503	ACCN5	ENSSSCG00000008869	Uncharacterized protein [Source:UniProtKB/TrEMBL;Acc:F1RW99]	gene	overlapping	5.49509	19.3168	-13.8217
Chr8:4389555-4391530	8	4389555	4391530	0.028261414	ACOX3	ENSSSCG00000008724	Uncharacterized protein [Source:UniProtKB/TrEMBL;Acc:F1S7X9]	gene	overlapping	17.7581	4.08425	13.6738
Chr13:80988302-81001906	13	80988302	81001906	0.028261414	ACPP	ENSSSCG00000011627	Tyrosine acid phosphatase [Source:UniProtKB/TrEMBL;Acc:C6KEM5]	gene	upstream	9.01307	18.938	-9.92492
Chr14:109861076-109868072	14	109861076	109868072	0.028261414	ACTA2	ENSSSCG00000010447	actin, aortic smooth muscle [Source:RefSeq peptide;Acc:NP_001158122]	gene	overlapping	11.8597	2.92011	8.93961
Chr3:7954971-7961563	3	7954971	7961563	0.028261414	ACTL6B	ENSSSCG00000007670	actin-like 6B [Source:HGNC Symbol;Acc:160]	gene	overlapping	15.3024	28.9105	-13.6082
Chr6:43122893-43124562	6	43122893	43124562	0.028261414	ACTN4	ENSSSCG00000002965	Uncharacterized protein [Source:UniProtKB/TrEMBL;Acc:F1RI39]	gene	overlapping	16.7485	33.2001	-16.4516
Chr17:47198202-47203699	17	47198202	47203699	0.028261414	ACTR5	ENSSSCG00000007349	Uncharacterized protein [Source:UniProtKB/TrEMBL;Acc:F1SDX1]	gene	overlapping	15.6503	2.54561	13.1047
Chr13:37312897-37318111	13	37312897	37318111	0.028261414	ACY1	ENSSSCG00000023325	Aminoacylase-1 [Source:UniProtKB/Swiss-Prot;Acc:P37111]	gene	overlapping	33.2796	20.5155	12.764
Chr17:52522264-52526426	17	52522264	52526426	0.028261414	ADA	ENSSSCG00000021255	adenosine deaminase [Source:HGNC Symbol;Acc:186]	gene	downstream	15.0967	7.5771	7.51961
Chr16:71610857-71617142	16	71610857	71617142	0.028261414	ADAM19	ENSSSCG00000017052	Uncharacterized protein [Source:UniProtKB/TrEMBL;Acc:F1RQF1]	gene	overlapping	3.71132	17.5088	-13.7975
Chr14:79463291-79466632	14	79463291	79466632	0.037476312	ADAMTS14	ENSSSCG00000010272	Uncharacterized protein [Source:UniProtKB/TrEMBL;Acc:F1SUB5]	gene	overlapping	7.37178	23.0126	-15.6408
Chr16:82698934-82702943	16	82698934	82702943	0.028261414	ADAMTS16	ENSSSCG00000017109	Uncharacterized protein [Source:UniProtKB/TrEMBL;Acc:F1S046]	gene	overlapping	21.0593	8.39231	12.667
Chr2:137498834-137504257	2	137498834	137504257	0.028261414	ADAMTS19	ENSSSCG00000014259	Uncharacterized protein [Source:UniProtKB/TrEMBL;Acc:F1RKJ8]	gene	overlapping	24.6209	11.5851	13.0358
Chr5:77358247-77367977	5	77358247	77367977	0.028261414	ADAMTS20	ENSSSCG00000000795	ADAM metallopeptidase with thrombospondin type 1 motif, 20 [Source:HGNC Symbol;Acc:17178]	gene	overlapping	14.0903	2.44651	11.6438
Chr13:217777267-217778336	13	217777267	217778336	0.028261414	ADARB1	ENSSSCG00000012089	adenosine deaminase, RNA-specific, B1 [Source:HGNC Symbol;Acc:226]	gene	overlapping	12.3292	39.0373	-26.7081
Chr13:217651043-217652026	13	217651043	217652026	0.032684762	ADARB1	ENSSSCG00000012089	adenosine deaminase, RNA-specific, B1 [Source:HGNC Symbol;Acc:226]	gene	overlapping	17.4839	36.8036	-19.3197
Chr13:217765737-217766642	13	217765737	217766642	0.028261414	ADARB1	ENSSSCG00000012089	adenosine deaminase, RNA-specific, B1 [Source:HGNC Symbol;Acc:226]	gene	overlapping	14.3657	29.5367	-15.171
Chr13:217653438-217654929	13	217653438	217654929	0.028261414	ADARB1	ENSSSCG00000012089	adenosine deaminase, RNA-specific, B1 [Source:HGNC Symbol;Acc:226]	gene	overlapping	27.7134	15.7821	11.9312
Chr13:217676768-217677566	13	217676768	217677566	0.049553055	ADARB1	ENSSSCG00000012089	adenosine deaminase, RNA-specific, B1 [Source:HGNC Symbol;Acc:226]	gene	overlapping	31.5725	9.69645	21.876
Chr10:75296267-75297639	10	75296267	75297639	0.045991335	ADARB2	ENSSSCG00000011160	Uncharacterized protein [Source:UniProtKB/TrEMBL;Acc:F1RX47]	gene	overlapping	28.1941	51.8243	-23.6302
Chr10:75244640-75246265	10	75244640	75246265	0.028261414	ADARB2	ENSSSCG00000011160	Uncharacterized protein [Source:UniProtKB/TrEMBL;Acc:F1RX47]	gene	overlapping	10.0625	29.5073	-19.4448
Chr10:75270430-75271143	10	75270430	75271143	0.044856343	ADARB2	ENSSSCG00000011160	Uncharacterized protein [Source:UniProtKB/TrEMBL;Acc:F1RX47]	gene	overlapping	9.07367	28.263	-19.1893
Chr6:83524689-83529672	6	83524689	83529672	0.028261414	ADC	ENSSSCG00000003619	arginine decarboxylase [Source:RefSeq peptide;Acc:NP_001116665]	gene	overlapping	10.8616	1.90631	8.95532
Chr18:54959179-54960798	18	54959179	54960798	0.028261414	ADCY1	ENSSSCG00000016726	Uncharacterized protein [Source:UniProtKB/TrEMBL;Acc:F1ST77]	gene	overlapping	7.26377	26.0772	-18.8135
Chr14:83209062-83227374	14	83209062	83227374	0.028261414	ADK	ENSSSCG00000010315	Uncharacterized protein [Source:UniProtKB/TrEMBL;Acc:F1S2G5]	gene	overlapping	18.0921	7.41162	10.6804
Chr9:125323030-125329291	9	125323030	125329291	0.028261414	ADORA1	ENSSSCG00000021059	A1 adenosine receptor [Source:RefSeq peptide;Acc:NP_001027525]	gene	overlapping	13.4698	24.9261	-11.4562
Chr2:157250133-157251776	2	157250133	157251776	0.033688985	AFAP1L1	ENSSSCG00000014431	Uncharacterized protein [Source:UniProtKB/TrEMBL;Acc:F1RL95]	gene	overlapping	14.2573	29.7879	-15.5306
Chr2:157229782-157231367	2	157229782	157231367	0.028261414	AFAP1L1	ENSSSCG00000014431	Uncharacterized protein [Source:UniProtKB/TrEMBL;Acc:F1RL95]	gene	overlapping	19.3629	34.6094	-15.2464
Chr2:157209227-157211094	2	157209227	157211094	0.033232503	AFAP1L1	ENSSSCG00000014431	Uncharacterized protein [Source:UniProtKB/TrEMBL;Acc:F1RL95]	gene	overlapping	15.762	28.0698	-12.3078
Chr2:157257328-157259210	2	157257328	157259210	0.028261414	AFAP1L1	ENSSSCG00000014431	Uncharacterized protein [Source:UniProtKB/TrEMBL;Acc:F1RL95]	gene	overlapping	12.7879	23.6464	-10.8585
Chr14:135749970-135753688	14	135749970	135753688	0.028261414	AFAP1L2	ENSSSCG00000010650	actin filament associated protein 1-like 2 [Source:HGNC Symbol;Acc:25901]	gene	overlapping	17.4003	42.0273	-24.627
ChrX:138700049-138702778	X	138700049	138702778	0.038591173	AFF2	ENSSSCG00000012730	AF4/FMR2 family, member 2 [Source:HGNC Symbol;Acc:3776]	gene	overlapping	14.2987	39.9782	-25.6795
ChrX:138718023-138722807	X	138718023	138722807	0.028261414	AFF2	ENSSSCG00000012730	AF4/FMR2 family, member 2 [Source:HGNC Symbol;Acc:3776]	gene	overlapping	12.8006	28.8532	-16.0526
Chr3:81187605-81195509	3	81187605	81195509	0.028261414	AFTPH	ENSSSCG00000008363	Uncharacterized protein [Source:UniProtKB/TrEMBL;Acc:F1SIY7]	gene	overlapping	22.59	11.053	11.5371
Chr15:150350617-150354477	15	150350617	150354477	0.028261414	AGAP1	ENSSSCG00000016317	Uncharacterized protein [Source:UniProtKB/TrEMBL;Acc:F1SM10]	gene	overlapping	33.0301	21.093	11.9371
Chr15:150424641-150427244	15	150424641	150427244	0.03771593	AGAP1	ENSSSCG00000016317	Uncharacterized protein [Source:UniProtKB/TrEMBL;Acc:F1SM10]	gene	overlapping	20.2928	6.11583	14.177
Chr18:6446257-6447421	18	6446257	6447421	0.028261414	AGAP3	ENSSSCG00000025610	ArfGAP with GTPase domain, ankyrin repeat and PH domain 3 [Source:HGNC Symbol;Acc:16923]	gene	overlapping	15.3675	29.4392	-14.0717
Chr3:119058415-119060205	3	119058415	119060205	0.028261414	AGBL5	ENSSSCG00000008558	Uncharacterized protein [Source:UniProtKB/TrEMBL;Acc:F1SDQ4]	gene	overlapping	20.9507	6.79073	14.1599
Chr1:8425516-8427655	1	8425516	8427655	0.028261414	AGPAT4	ENSSSCG00000004033	1-acyl-sn-glycerol-3-phosphate acyltransferase delta [Source:RefSeq peptide;Acc:NP_001137169]	gene	overlapping	34.549	25.1058	9.44321
Chr18:20493573-20500902	18	20493573	20500902	0.028261414	AHCYL2	ENSSSCG00000016568	Adenosylhomocysteinase [Source:UniProtKB/TrEMBL;Acc:F1SMQ4]	gene	overlapping	8.96522	18.4144	-9.44918
Chr6:135657942-135662391	6	135657942	135662391	0.028261414	AK3L1	ENSSSCG00000003808	adenylate kinase isoenzyme 4, mitochondrial [Source:RefSeq peptide;Acc:NP_001038062]	gene	overlapping	20.7746	8.73855	12.0361
Chr7:124876144-124881240	7	124876144	124881240	0.028261414	AK7	ENSSSCG00000002504	Uncharacterized protein [Source:UniProtKB/TrEMBL;Acc:F1SAQ8]	gene	overlapping	12.2484	2.77988	9.46849
Chr9:78783680-78796447	9	78783680	78796447	0.028261414	AKAP9	ENSSSCG00000015310	Uncharacterized protein [Source:UniProtKB/TrEMBL;Acc:F1S317]	gene	overlapping	20.5578	8.17489	12.3829
Chr4:121693667-121701685	4	121693667	121701685	0.028261414	AKNAD1	ENSSSCG00000006842	AKNA domain containing 1 [Source:HGNC Symbol;Acc:28398]	gene	overlapping	17.0952	8.02993	9.06529
Chr18:15612697-15614775	18	15612697	15614775	0.028261414	AKR1B1	ENSSSCG00000016539	Aldose reductase [Source:UniProtKB/Swiss-Prot;Acc:P80276]	gene	overlapping	13.3492	28.2719	-14.9226
Chr4:134102027-134107118	4	134102027	134107118	0.028261414	ALG14	ENSSSCG00000006885	Uncharacterized protein [Source:UniProtKB/TrEMBL;Acc:F1S544]	gene	overlapping	5.71861	23.0485	-17.3299
Chr1:86413485-86421871	1	86413485	86421871	0.028261414	AMD1	ENSSSCG00000004392	S-adenosylmethionine decarboxylase proenzyme [Source:UniProtKB/TrEMBL;Acc:F1RT08]	gene	overlapping	15.2825	23.4116	-8.12908
Chr9:50562055-50568633	9	50562055	50568633	0.028261414	AMICA1	ENSSSCG00000015089	Uncharacterized protein [Source:UniProtKB/TrEMBL;Acc:F1SAL1]	gene	overlapping	14.9394	4.77657	10.1629
ChrX:106958104-106966012	X	106958104	106966012	0.028261414	AMOT	ENSSSCG00000012591	Uncharacterized protein [Source:UniProtKB/TrEMBL;Acc:F1RWT7]	gene	overlapping	5.23997	19.2218	-13.9818
Chr9:30712831-30716931	9	30712831	30716931	0.029983466	AMOTL1	ENSSSCG00000014960	Uncharacterized protein [Source:UniProtKB/TrEMBL;Acc:F1STJ4]	gene	overlapping	6.82149	16.8968	-10.0753
Chr9:30674884-30677055	9	30674884	30677055	0.028261414	AMOTL1	ENSSSCG00000014960	Uncharacterized protein [Source:UniProtKB/TrEMBL;Acc:F1STJ4]	gene	overlapping	13.2158	4.81982	8.39602
Chr3:2030674-2031368	3	2030674	2031368	0.028261414	AMZ1	ENSSSCG00000007564	archaemetzincin-1 [Source:RefSeq peptide;Acc:NP_001182254]	gene	overlapping	36.0029	52.0155	-16.0126
Chr8:117438247-117446727	8	117438247	117446727	0.039093684	ANK2	ENSSSCG00000009125	ankyrin 2, neuronal [Source:HGNC Symbol;Acc:493]	gene	overlapping	12.6091	23.0074	-10.3983
Chr14:68433780-68436396	14	68433780	68436396	0.028261414	ANK3	ENSSSCG00000010212	ankyrin 3, node of Ranvier (ankyrin G) [Source:HGNC Symbol;Acc:494]	gene	overlapping	14.4327	30.7197	-16.287
Chr14:68503081-68507934	14	68503081	68507934	0.028261414	ANK3	ENSSSCG00000010212	ankyrin 3, node of Ranvier (ankyrin G) [Source:HGNC Symbol;Acc:494]	gene	overlapping	16.3041	6.81111	9.49301
Chr6:769504-770319	6	769504	770319	0.028261414	ANKRD11	ENSSSCG00000022410	ankyrin repeat domain 11 [Source:HGNC Symbol;Acc:21316]	gene	overlapping	49.2741	33.4638	15.8103
Chr10:71238652-71240827	10	71238652	71240827	0.028261414	ANKRD16	ENSSSCG00000028790	ankyrin repeat domain 16 [Source:HGNC Symbol;Acc:23471]	gene	upstream	13.4126	26.1888	-12.7762
Chr6:38085734-38089273	6	38085734	38089273	0.028261414	ANKRD27	ENSSSCG00000002859	Uncharacterized protein [Source:UniProtKB/TrEMBL;Acc:F1RNY3]	gene	overlapping	14.3693	22.6229	-8.25362
Chr16:37387239-37391965	16	37387239	37391965	0.028261414	ANKRD55	ENSSSCG00000016917	Uncharacterized protein [Source:UniProtKB/TrEMBL;Acc:F1SLL0]	gene	overlapping	10.9755	32.6515	-21.676
Chr1:268773746-268779910	1	268773746	268779910	0.048948076	ANKS6	ENSSSCG00000005378	Uncharacterized protein [Source:UniProtKB/TrEMBL;Acc:F1SSF0]	gene	overlapping	9.93207	20.5295	-10.5975
Chr8:146922783-146926123	8	146922783	146926123	0.028261414	ANTXR2	ENSSSCG00000009256	Uncharacterized protein [Source:UniProtKB/TrEMBL;Acc:F1RVC2]	gene	overlapping	16.8351	36.5632	-19.7281
Chr4:16451892-16456818	4	16451892	16456818	0.028261414	ANXA13	ENSSSCG00000005979	Annexin [Source:UniProtKB/TrEMBL;Acc:F1RRP6]	gene	overlapping	6.69962	16.7965	-10.0969
Chr8:109615410-109624285	8	109615410	109624285	0.028261414	ANXA5	ENSSSCG00000009097	annexin A5 [Source:HGNC Symbol;Acc:543]	gene	overlapping	5.46296	18.0912	-12.6282
Chr16:78105219-78108101	16	78105219	78108101	0.028261414	ANXA6	ENSSSCG00000017089	Annexin [Source:UniProtKB/TrEMBL;Acc:F1S0V3]	gene	overlapping	12.4986	23.5866	-11.0881
Chr6:75064672-75071189	6	75064672	75071189	0.028261414	AOF2	ENSSSCG00000003531	lysine-specific histone demethylase 1A [Source:RefSeq peptide;Acc:NP_001106157]	gene	overlapping	17.381	8.12631	9.2547
Chr3:77265507-77285476	3	77265507	77285476	0.028261414	APLF	ENSSSCG00000008346	Uncharacterized protein [Source:UniProtKB/TrEMBL;Acc:F1SJ24]	gene	overlapping	7.40196	14.3824	-6.98046
Chr9:49273495-49275955	9	49273495	49275955	0.028261414	APOA4	ENSSSCG00000015068	Apolipoprotein A-IV [Source:UniProtKB/Swiss-Prot;Acc:O46409]	gene	overlapping	8.05291	21.6128	-13.5598
Chr6:146597140-146599657	6	146597140	146599657	0.028261414	APOER2	ENSSSCG00000003848	low-density lipoprotein receptor-related protein 8 [Source:RefSeq peptide;Acc:NP_001186820]	gene	overlapping	18.4369	32.1916	-13.7547
Chr9:8010423-8012685	9	8010423	8012685	0.028261414	ARAP1	ENSSSCG00000014817	ArfGAP with RhoGAP domain, ankyrin repeat and PH domain 1 [Source:HGNC Symbol;Acc:16925]	gene	overlapping	12.2433	24.9414	-12.6981
Chr9:8001422-8003398	9	8001422	8003398	0.028261414	ARAP1	ENSSSCG00000014817	ArfGAP with RhoGAP domain, ankyrin repeat and PH domain 1 [Source:HGNC Symbol;Acc:16925]	gene	overlapping	37.1915	16.6671	20.5244
Chr8:29162296-29172904	8	29162296	29172904	0.028261414	ARAP2	ENSSSCG00000008768	Uncharacterized protein [Source:UniProtKB/TrEMBL;Acc:F1S4M1]	gene	overlapping	5.73654	14.7054	-8.96885
Chr5:3387607-3392225	5	3387607	3392225	0.028261414	ARFGAP3	ENSSSCG00000000037	Uncharacterized protein [Source:UniProtKB/TrEMBL;Acc:F1SJR4]	gene	overlapping	25.2716	8.55467	16.7169
Chr5:3488169-3490286	5	3488169	3490286	0.028261414	ARFGAP3	ENSSSCG00000000037	Uncharacterized protein [Source:UniProtKB/TrEMBL;Acc:F1SJR4]	gene	overlapping	34.7215	15.4692	19.2523
Chr8:142358111-142364266	8	142358111	142364266	0.028261414	ARHGAP24	ENSSSCG00000009229	Rho GTPase activating protein 24 [Source:HGNC Symbol;Acc:25361]	gene	overlapping	8.4346	17.2677	-8.83308
Chr2:150625734-150627960	2	150625734	150627960	0.028261414	ARHGAP26	ENSSSCG00000014399	Uncharacterized protein [Source:UniProtKB/TrEMBL;Acc:F1RM37]	gene	overlapping	11.2413	26.7186	-15.4773
Chr2:150844730-150847133	2	150844730	150847133	0.028261414	ARHGAP26	ENSSSCG00000014399	Uncharacterized protein [Source:UniProtKB/TrEMBL;Acc:F1RM37]	gene	overlapping	6.22974	16.531	-10.3013
Chr2:150834058-150838044	2	150834058	150838044	0.028261414	ARHGAP26	ENSSSCG00000014399	Uncharacterized protein [Source:UniProtKB/TrEMBL;Acc:F1RM37]	gene	overlapping	15.5922	4.03509	11.5571
Chr2:150695110-150698237	2	150695110	150698237	0.028261414	ARHGAP26	ENSSSCG00000014399	Uncharacterized protein [Source:UniProtKB/TrEMBL;Acc:F1RM37]	gene	overlapping	23.1122	11.0036	12.1087
Chr6:93659784-93667641	6	93659784	93667641	0.028261414	ARHGAP28	ENSSSCG00000003686	Uncharacterized protein [Source:UniProtKB/TrEMBL;Acc:F1SM88]	gene	overlapping	15.7327	3.96579	11.7669
Chr13:150224717-150232107	13	150224717	150232107	0.028261414	ARHGAP31	ENSSSCG00000026224	Uncharacterized protein [Source:UniProtKB/TrEMBL;Acc:F1SPA5]	gene	overlapping	18.5924	4.76955	13.8229
Chr4:101539238-101545385	4	101539238	101545385	0.028261414	ARHGEF11	ENSSSCG00000006461	Uncharacterized protein [Source:UniProtKB/TrEMBL;Acc:F1RHK9]	gene	overlapping	23.4246	13.9776	9.44699
Chr2:157488343-157490022	2	157488343	157490022	0.035126112	ARHGEF37	ENSSSCG00000014436	Uncharacterized protein [Source:UniProtKB/TrEMBL;Acc:F1RL91]	gene	overlapping	15.8427	30.6116	-14.7689
Chr1:84300662-84306878	1	84300662	84306878	0.028261414	ARMC2	ENSSSCG00000004388	armadillo repeat containing 2 [Source:HGNC Symbol;Acc:23045]	gene	overlapping	9.76421	31.7576	-21.9934
Chr10:57609132-57616488	10	57609132	57616488	0.028261414	ARMC3	ENSSSCG00000011078	Uncharacterized protein [Source:UniProtKB/TrEMBL;Acc:F1RVI7]	gene	overlapping	18.9604	7.92617	11.0343
Chr3:17356962-17361136	3	17356962	17361136	0.028261414	ARMC5	ENSSSCG00000025245	armadillo repeat containing 5 [Source:HGNC Symbol;Acc:25781]	gene	upstream	26.8068	9.99957	16.8072
ChrX:97034342-97044472	X	97034342	97044472	0.029749926	ARMCX6	ENSSSCG00000012508	Uncharacterized protein [Source:UniProtKB/TrEMBL;Acc:F1RYH0]	gene	overlapping	8.11239	24.3328	-16.2204
Chr3:135320875-135322618	3	135320875	135322618	0.032728363	ASAP2	ENSSSCG00000008642	ArfGAP with SH3 domain, ankyrin repeat and PH domain 2 [Source:HGNC Symbol;Acc:2721]	gene	overlapping	9.92366	32.2668	-22.3431
Chr3:135298255-135299920	3	135298255	135299920	0.028261414	ASAP2	ENSSSCG00000008642	ArfGAP with SH3 domain, ankyrin repeat and PH domain 2 [Source:HGNC Symbol;Acc:2721]	gene	overlapping	10.3381	25.7634	-15.4253
Chr3:135306784-135308228	3	135306784	135308228	0.028261414	ASAP2	ENSSSCG00000008642	ArfGAP with SH3 domain, ankyrin repeat and PH domain 2 [Source:HGNC Symbol;Acc:2721]	gene	overlapping	18.3899	31.3475	-12.9575
Chr4:103184728-103196446	4	103184728	103196446	0.037968002	ASH1L	ENSSSCG00000006508	Uncharacterized protein [Source:UniProtKB/TrEMBL;Acc:F1RLM3]	gene	overlapping	20.1547	6.61573	13.5389
Chr10:24612482-24615070	10	24612482	24615070	0.028261414	ASPM	ENSSSCG00000010896	Abnormal spindle-like microcephaly-associated protein [Source:UniProtKB/TrEMBL;Acc:Q6ULQ9]	gene	overlapping	19.5753	6.9139	12.6614
Chr3:120148371-120156416	3	120148371	120156416	0.028261414	ASXL2	ENSSSCG00000008575	Uncharacterized protein [Source:UniProtKB/TrEMBL;Acc:F1SDL7]	gene	overlapping	18.6487	8.16056	10.4882
Chr4:96795761-96805781	4	96795761	96805781	0.028261414	ATF6	ENSSSCG00000006346	Activating transcription factor 6 [Source:UniProtKB/TrEMBL;Acc:C8ZL57]	gene	overlapping	17.2067	6.07843	11.1283
Chr13:156880660-156891592	13	156880660	156891592	0.028261414	ATG3	ENSSSCG00000011930	Autophagy-related protein 3 [Source:UniProtKB/TrEMBL;Acc:F1SLS7]	gene	overlapping	16.7641	30.6953	-13.9312
Chr4:114451905-114465307	4	114451905	114465307	0.028261414	ATP1A1	ENSSSCG00000006740	Sodium/potassium-transporting ATPase subunit alpha-1 [Source:UniProtKB/Swiss-Prot;Acc:P05024]	gene	overlapping	16.2066	23.9834	-7.77683
Chr6:4665475-4666878	6	4665475	4666878	0.028261414	ATP2C2	ENSSSCG00000002671	Uncharacterized protein [Source:UniProtKB/TrEMBL;Acc:F1S5U9]	gene	overlapping	21.437	32.2449	-10.8079
Chr4:36909396-36914465	4	36909396	36914465	0.038419135	ATP6V1C1	ENSSSCG00000006054	ATPase, H+ transporting, lysosomal 42kDa, V1 subunit C1 [Source:RefSeq peptide;Acc:NP_001177134]	gene	overlapping	10.6852	29.4692	-18.7839
Chr8:35290209-35298009	8	35290209	35298009	0.028261414	ATP8A1	ENSSSCG00000008803	Uncharacterized protein [Source:UniProtKB/TrEMBL;Acc:F1S3T6]	gene	overlapping	2.79475	13.2531	-10.4583
Chr3:14942799-14943654	3	14942799	14943654	0.028261414	AUTS2	ENSSSCG00000007727	Autism susceptibility gene 2 [Source:UniProtKB/TrEMBL;Acc:F7IY48]	gene	overlapping	7.04554	36.0013	-28.9558
Chr3:41036443-41037297	3	41036443	41037297	0.028261414	AXIN1	ENSSSCG00000023204	axin 1 [Source:HGNC Symbol;Acc:903]	gene	overlapping	16.8855	35.7594	-18.8739
Chr3:41050919-41052313	3	41050919	41052313	0.028261414	AXIN1	ENSSSCG00000023204	axin 1 [Source:HGNC Symbol;Acc:903]	gene	overlapping	24.5579	38.8644	-14.3065
Chr3:7129657-7133881	3	7129657	7133881	0.028261414	AZGP1	ENSSSCG00000007642	Uncharacterized protein [Source:UniProtKB/TrEMBL;Acc:F1RNP2]	gene	upstream	7.66096	24.2748	-16.6138
Chr12:1446873-1448491	12	1446873	1448491	0.028261414	AZI1	ENSSSCG00000017143	Uncharacterized protein [Source:UniProtKB/TrEMBL;Acc:F1RZA9]	gene	overlapping	4.75174	26.0702	-21.3184
Chr7:34147953-34151062	7	34147953	34151062	0.028261414	B3GALT4	ENSSSCG00000001503	Uncharacterized protein [Source:UniProtKB/TrEMBL;Acc:F1RZT4]	gene	overlapping	14.0295	28.6526	-14.6231
Chr12:465405-466609	12	465405	466609	0.028261414	B3GNTL1	ENSSSCG00000027229	UDP-GlcNAc:betaGal beta-1,3-N-acetylglucosaminyltransferase-like 1 [Source:HGNC Symbol;Acc:21727]	gene	overlapping	33.0822	51.7048	-18.6226
Chr12:428173-429178	12	428173	429178	0.028261414	B3GNTL1	ENSSSCG00000027229	UDP-GlcNAc:betaGal beta-1,3-N-acetylglucosaminyltransferase-like 1 [Source:HGNC Symbol;Acc:21727]	gene	overlapping	18.9157	31.5328	-12.6171
Chr12:455351-457580	12	455351	457580	0.028261414	B3GNTL1	ENSSSCG00000027229	UDP-GlcNAc:betaGal beta-1,3-N-acetylglucosaminyltransferase-like 1 [Source:HGNC Symbol;Acc:21727]	gene	overlapping	11.4328	21.6332	-10.2003
Chr12:440356-442270	12	440356	442270	0.028261414	B3GNTL1	ENSSSCG00000027229	UDP-GlcNAc:betaGal beta-1,3-N-acetylglucosaminyltransferase-like 1 [Source:HGNC Symbol;Acc:21727]	gene	overlapping	27.348	13.9211	13.4269
Chr6:81952494-81955978	6	81952494	81955978	0.028261414	BAI2	ENSSSCG00000003604	Uncharacterized protein [Source:UniProtKB/TrEMBL;Acc:F1SV98]	gene	downstream	6.21829	16.112	-9.8937
Chr12:1560861-1562034	12	1560861	1562034	0.028261414	BAIAP2	ENSSSCG00000017142	Uncharacterized protein [Source:UniProtKB/TrEMBL;Acc:F1RZB1]	gene	overlapping	19.8502	41.2201	-21.3699
Chr12:1538070-1539425	12	1538070	1539425	0.03262581	BAIAP2	ENSSSCG00000017142	Uncharacterized protein [Source:UniProtKB/TrEMBL;Acc:F1RZB1]	gene	overlapping	8.70073	25.469	-16.7683
Chr12:1532933-1534188	12	1532933	1534188	0.028261414	BAIAP2	ENSSSCG00000017142	Uncharacterized protein [Source:UniProtKB/TrEMBL;Acc:F1RZB1]	gene	overlapping	22.5151	36.118	-13.603
Chr12:1539426-1540738	12	1539426	1540738	0.028261414	BAIAP2	ENSSSCG00000017142	Uncharacterized protein [Source:UniProtKB/TrEMBL;Acc:F1RZB1]	gene	overlapping	18.9234	32.2122	-13.2888
Chr5:23619079-23629083	5	23619079	23629083	0.03238576	BAZ2A	ENSSSCG00000000403	Uncharacterized protein [Source:UniProtKB/TrEMBL;Acc:F1SLA2]	gene	overlapping	25.3958	13.0547	12.3411
Chr8:109422372-109430563	8	109422372	109430563	0.034924503	BBS7	ENSSSCG00000009093	Uncharacterized protein [Source:UniProtKB/TrEMBL;Acc:F1S1T9]	gene	overlapping	14.4792	3.3036	11.1756
ChrX:142040446-142043076	X	142040446	142043076	0.028261414	BCAP31	ENSSSCG00000012772	Uncharacterized protein [Source:UniProtKB/TrEMBL;Acc:F1S2A8]	gene	overlapping	31.5432	20.0873	11.4559
Chr17:58742181-58744049	17	58742181	58744049	0.028736353	BCAS4	ENSSSCG00000007472	breast carcinoma-amplified sequence 4 [Source:RefSeq peptide;Acc:NP_001116554]	gene	overlapping	9.22822	25.0198	-15.7916
Chr9:51186309-51187936	9	51186309	51187936	0.033392455	BCL9L	ENSSSCG00000015099	Uncharacterized protein [Source:UniProtKB/TrEMBL;Acc:F1SAJ3]	gene	overlapping	10.9433	32.7638	-21.8204
Chr14:52737357-52740659	14	52737357	52740659	0.028261414	BCR	ENSSSCG00000010052	breakpoint cluster region [Source:HGNC Symbol;Acc:1014]	gene	overlapping	13.0008	22.9	-9.8992
Chr16:51825269-51831744	16	51825269	51831744	0.034309566	BDP1	ENSSSCG00000016968	Uncharacterized protein [Source:UniProtKB/TrEMBL;Acc:F1SK28]	gene	overlapping	7.58434	17.6763	-10.0919
Chr3:113975748-113982886	3	113975748	113982886	0.028261414	BIRC6	ENSSSCG00000008513	Uncharacterized protein [Source:UniProtKB/TrEMBL;Acc:F1S402]	gene	overlapping	23.3324	9.64519	13.6872
Chr18:56065791-56069674	18	56065791	56069674	0.028261414	BLVRA	ENSSSCG00000016756	Uncharacterized protein [Source:UniProtKB/TrEMBL;Acc:F1SSF5]	gene	overlapping	35.4981	21.9886	13.5096
Chr7:5317409-5321077	7	5317409	5321077	0.028261414	BMP6	ENSSSCG00000001027	bone morphogenetic protein 6 [Source:RefSeq peptide;Acc:NP_001161473]	gene	upstream	35.8159	20.8526	14.9633
Chr7:5287491-5290093	7	5287491	5290093	0.028261414	BMP6	ENSSSCG00000001027	bone morphogenetic protein 6 [Source:RefSeq peptide;Acc:NP_001161473]	gene	overlapping	30.1942	13.6976	16.4966
Chr1:230014090-230022800	1	230014090	230022800	0.028261414	BNC2	ENSSSCG00000025613	Uncharacterized protein [Source:UniProtKB/TrEMBL;Acc:F1SNE1]	gene	overlapping	5.80097	19.7967	-13.9958
Chr1:229934174-229946023	1	229934174	229946023	0.028261414	BNC2	ENSSSCG00000025613	Uncharacterized protein [Source:UniProtKB/TrEMBL;Acc:F1SNE1]	gene	overlapping	26.6053	13.2989	13.3064
Chr18:9546219-9549863	18	9546219	9549863	0.028261414	BRAF	ENSSSCG00000016494	v-raf murine sarcoma viral oncogene homolog B1 [Source:HGNC Symbol;Acc:1097]	gene	overlapping	9.56376	27.5201	-17.9564
Chr12:20044855-20051989	12	20044855	20051989	0.028261414	BRCA1	ENSSSCG00000022101	Breast cancer type 1 susceptibility protein homolog [Source:UniProtKB/TrEMBL;Acc:A5A751]	gene	overlapping	6.35763	20.9635	-14.6058
Chr14:113069642-113080018	14	113069642	113080018	0.028261414	BTAF1	ENSSSCG00000010467	Uncharacterized protein [Source:UniProtKB/TrEMBL;Acc:F1SCA0]	gene	overlapping	18.211	8.27074	9.94021
Chr7:39049589-39057909	7	39049589	39057909	0.028261414	BTBD9	ENSSSCG00000030073	BTB (POZ) domain containing 9 [Source:RefSeq peptide;Acc:NP_001230232]	gene	overlapping	18.2284	6.51177	11.7166
Chr2:159556586-159570891	2	159556586	159570891	0.028261414	BTNL9	ENSSSCG00000028567	butyrophilin-like 9 [Source:HGNC Symbol;Acc:24176]	gene	overlapping	20.3263	31.4255	-11.0992
Chr12:36222019-36223753	12	36222019	36223753	0.028261414	BZRAP1	ENSSSCG00000017638	Uncharacterized protein [Source:UniProtKB/TrEMBL;Acc:F1RRP0]	gene	overlapping	1.9051	15.4094	-13.5043
Chr14:79539385-79542487	14	79539385	79542487	0.028261414	C10ORF27	ENSSSCG00000010273	Uncharacterized protein [Source:UniProtKB/TrEMBL;Acc:F1SUB4]	gene	overlapping	11.0581	22.3779	-11.3198
Chr14:122774204-122783503	14	122774204	122783503	0.028261414	C10ORF76	ENSSSCG00000010571	Uncharacterized protein [Source:UniProtKB/TrEMBL;Acc:F1S8T4]	gene	overlapping	24.7385	11.9807	12.7577
Chr14:147522325-147526310	14	147522325	147526310	0.028261414	C10ORF90	ENSSSCG00000010747	Uncharacterized protein [Source:UniProtKB/TrEMBL;Acc:F1SDM2]	gene	overlapping	3.5283	15.8561	-12.3278
Chr2:45420291-45431515	2	45420291	45431515	0.028789042	C11ORF58	ENSSSCG00000013383	Uncharacterized protein [Source:UniProtKB/TrEMBL;Acc:F1S994]	gene	overlapping	23.425	14.8296	8.59537
Chr5:68138515-68147532	5	68138515	68147532	0.049059253	C12ORF4	ENSSSCG00000000723	hypothetical protein LOC100153309 isoform 2 [Source:RefSeq peptide;Acc:NP_001230341]	gene	overlapping	20.0226	5.49395	14.5286
Chr5:66453009-66455206	5	66453009	66455206	0.028261414	C12ORF53	ENSSSCG00000000692	Uncharacterized protein [Source:UniProtKB/TrEMBL;Acc:F1SLT0]	gene	overlapping	23.2086	11.2158	11.9927
Chr5:82303620-82350230	5	82303620	82350230	0.028261414	C12orf54	ENSSSCG00000030501	chromosome 12 open reading frame 54 [Source:HGNC Symbol;Acc:28553]	gene	overlapping	10.7067	22.4199	-11.7133
Chr1:206501671-206510587	1	206501671	206510587	0.028261414	C14ORF101	ENSSSCG00000005062	Uncharacterized protein [Source:UniProtKB/TrEMBL;Acc:F1SSM4]	gene	overlapping	24.8618	14.1883	10.6735
Chr7:105402744-105412823	7	105402744	105412823	0.028261414	C14ORF118	ENSSSCG00000002387	hypothetical protein LOC100153141 [Source:RefSeq peptide;Acc:NP_001230333]	gene	overlapping	24.8072	14.7727	10.0345
Chr1:210233333-210244775	1	210233333	210244775	0.028261414	C14ORF135	ENSSSCG00000005082	Uncharacterized protein [Source:UniProtKB/TrEMBL;Acc:F1SSI4]	gene	overlapping	18.4541	5.45109	13.003
Chr17:66769587-66773694	17	66769587	66773694	0.028261414	C17H20ORF174	ENSSSCG00000007526	hypothetical protein LOC100144512 [Source:RefSeq peptide;Acc:NP_001116559]	gene	overlapping	6.49962	22.5018	-16.0022
Chr12:55022754-55025162	12	55022754	55025162	0.028261414	C17orf74	ENSSSCG00000024584	chromosome 17 open reading frame 74 [Source:HGNC Symbol;Acc:27315]	gene	overlapping	5.3185	19.2953	-13.9768
Chr12:44365122-44371399	12	44365122	44371399	0.028261414	C17ORF75	ENSSSCG00000017733	protein Njmu-R1 [Source:RefSeq peptide;Acc:NP_001182049]	gene	downstream	19.3902	5.34492	14.0453
Chr6:44405383-44408939	6	44405383	44408939	0.028261414	C19orf47	ENSSSCG00000027016	chromosome 19 open reading frame 47 [Source:HGNC Symbol;Acc:26723]	gene	overlapping	20.4087	10.578	9.83073
Chr6:69795160-69798356	6	69795160	69798356	0.028261414	C1orf144	ENSSSCG00000003475	chromosome 1 open reading frame 144 [Source:HGNC Symbol;Acc:30232]	gene	overlapping	23.5108	10.3511	13.1597
Chr6:75782713-75791517	6	75782713	75791517	0.028261414	C1orf201	ENSSSCG00000003541	chromosome 1 open reading frame 201 [Source:HGNC Symbol;Acc:28070]	gene	overlapping	8.34533	15.4094	-7.06406
Chr6:58517336-58520258	6	58517336	58520258	0.028261414	C1orf222	ENSSSCG00000030513	chromosome 1 open reading frame 222 [Source:HGNC Symbol;Acc:27917]	gene	overlapping	8.32371	18.6074	-10.2837
Chr17:40992174-40995323	17	40992174	40995323	0.028261414	C20ORF112	ENSSSCG00000007249	Uncharacterized protein [Source:UniProtKB/TrEMBL;Acc:F1S517]	gene	overlapping	11.477	24.9366	-13.4596
Chr17:34943834-34945586	17	34943834	34945586	0.028261414	C20ORF3	ENSSSCG00000007132	Uncharacterized protein [Source:UniProtKB/TrEMBL;Acc:F1SAS3]	gene	overlapping	0.191478	6.68553	-6.49405
Chr13:218496395-218498022	13	218496395	218498022	0.028261414	C21orf56	ENSSSCG00000029847	chromosome 21 open reading frame 56 [Source:HGNC Symbol;Acc:1298]	gene	overlapping	15.0588	29.8071	-14.7483
Chr13:215578982-215580951	13	215578982	215580951	0.028261414	C2CD2	ENSSSCG00000025821	Uncharacterized protein [Source:UniProtKB/TrEMBL;Acc:F1SG46]	gene	overlapping	7.17034	23.0329	-15.8625
Chr13:36235866-36241887	13	36235866	36241887	0.033889573	C3ORF18	ENSSSCG00000011413	Uncharacterized protein [Source:UniProtKB/TrEMBL;Acc:F1SJ18]	gene	upstream	19.7199	10.7521	8.96776
Chr13:72340687-72349245	13	72340687	72349245	0.028261414	C3orf32	ENSSSCG00000023082	chromosome 3 open reading frame 32 [Source:HGNC Symbol;Acc:24809]	gene	downstream	13.078	25.3706	-12.2926
Chr1:313757813-313759161	1	313757813	313759161	0.036361616	C8G	ENSSSCG00000005840	complement component C8G [Source:RefSeq peptide;Acc:NP_001090921]	gene	overlapping	24.5368	9.07937	15.4574
Chr14:13012645-13018244	14	13012645	13018244	0.028261414	C8ORF80	ENSSSCG00000009673	Uncharacterized protein [Source:UniProtKB/TrEMBL;Acc:F1RJR4]	gene	overlapping	6.42891	16.3683	-9.93942
Chr4:68331101-68338531	4	68331101	68338531	0.028261414	C8ORF84	ENSSSCG00000006183	Uncharacterized protein [Source:UniProtKB/TrEMBL;Acc:F1RWI4]	gene	overlapping	9.80087	0.406584	9.39429
Chr1:267275772-267281853	1	267275772	267281853	0.028261414	C9orf174	ENSSSCG00000025655	chromosome 9 open reading frame 174 [Source:HGNC Symbol;Acc:29303]	gene	overlapping	14.0271	23.3019	-9.2748
Chr1:280674033-280685911	1	280674033	280685911	0.038497485	C9ORF5	ENSSSCG00000005444	Uncharacterized protein [Source:UniProtKB/TrEMBL;Acc:F1SP24]	gene	overlapping	15.3489	6.6747	8.67422
Chr1:313922022-313923396	1	313922022	313923396	0.028261414	C9ORF86	ENSSSCG00000005841	Uncharacterized protein [Source:UniProtKB/TrEMBL;Acc:F1RVY4]	gene	overlapping	17.5922	30.6539	-13.0616
Chr14:53185411-53188441	14	53185411	53188441	0.029844543	CABIN1	ENSSSCG00000010062	Uncharacterized protein [Source:UniProtKB/TrEMBL;Acc:F1RL39]	gene	overlapping	9.39768	24.9442	-15.5466
Chr14:53213492-53221611	14	53213492	53221611	0.028261414	CABIN1	ENSSSCG00000010062	Uncharacterized protein [Source:UniProtKB/TrEMBL;Acc:F1RL39]	gene	overlapping	13.4303	21.286	-7.85573
Chr1:307036832-307038469	1	307036832	307038469	0.028261414	CACFD1	ENSSSCG00000021113	calcium channel flower domain containing 1 [Source:HGNC Symbol;Acc:1365]	gene	overlapping	18.2532	8.59413	9.65902
Chr2:66134628-66140072	2	66134628	66140072	0.028261414	CACNA1A	ENSSSCG00000013754	Uncharacterized protein [Source:UniProtKB/TrEMBL;Acc:F1SD80]	gene	overlapping	10.4701	23.3928	-12.9227
Chr9:135448778-135452486	9	135448778	135452486	0.028261414	CACNA1E	ENSSSCG00000015543	calcium channel, voltage-dependent, R type, alpha 1E subunit [Source:HGNC Symbol;Acc:1392]	gene	overlapping	19.2147	33.1927	-13.978
Chr9:135338837-135344249	9	135338837	135344249	0.028261414	CACNA1E	ENSSSCG00000015543	calcium channel, voltage-dependent, R type, alpha 1E subunit [Source:HGNC Symbol;Acc:1392]	gene	overlapping	7.43567	18.6641	-11.2284
Chr12:13796658-13799716	12	13796658	13799716	0.028261414	CACNG4	ENSSSCG00000023102	Uncharacterized protein [Source:UniProtKB/TrEMBL;Acc:F1RV12]	gene	overlapping	18.1074	6.50396	11.6034
Chr10:27748483-27750749	10	27748483	27750749	0.028261414	CAMSAP2	ENSSSCG00000027314	calmodulin regulated spectrin-associated protein family, member 2 [Source:HGNC Symbol;Acc:29188]	gene	overlapping	10.4937	20.3787	-9.88496
Chr9:12317147-12319792	9	12317147	12319792	0.042721737	CAPN5	ENSSSCG00000014875	Uncharacterized protein [Source:UniProtKB/TrEMBL;Acc:F1SUK6]	gene	overlapping	3.59898	23.8465	-20.2476
Chr5:7935580-7955814	5	7935580	7955814	0.028261414	CARD10	ENSSSCG00000025260	caspase recruitment domain family, member 10 [Source:HGNC Symbol;Acc:16422]	gene	overlapping	2.91727	14.5476	-11.6303
Chr2:70054541-70059702	2	70054541	70059702	0.028261414	CARM1	ENSSSCG00000013633	Uncharacterized protein [Source:UniProtKB/TrEMBL;Acc:F1S590]	gene	overlapping	8.85221	22.3792	-13.527
Chr15:116199868-116207040	15	116199868	116207040	0.028261414	CASP10	ENSSSCG00000026940	caspase-10 [Source:RefSeq peptide;Acc:NP_001155112]	gene	overlapping	11.4922	0.949015	10.5432
Chr17:42066831-42074940	17	42066831	42074940	0.028261414	CBFA2T2	ENSSSCG00000027410	Uncharacterized protein [Source:UniProtKB/TrEMBL;Acc:F1S4Z8]	gene	overlapping	8.17302	22.2463	-14.0733
Chr13:162857749-162875354	13	162857749	162875354	0.028261414	CBLB	ENSSSCG00000022486	Cbl proto-oncogene, E3 ubiquitin protein ligase B [Source:HGNC Symbol;Acc:1542]	gene	overlapping	18.4954	7.53432	10.961
Chr6:49365069-49368038	6	49365069	49368038	0.028261414	CCDC114	ENSSSCG00000026689	coiled-coil domain containing 114 [Source:HGNC Symbol;Acc:26560]	gene	overlapping	16.3156	30.2673	-13.9516
ChrX:47982545-47985510	X	47982545	47985510	0.031336553	CCDC120	ENSSSCG00000012288	Uncharacterized protein [Source:UniProtKB/TrEMBL;Acc:F1RW56]	gene	downstream	13.9546	32.785	-18.8304
ChrX:47990611-47992626	X	47990611	47992626	0.028261414	CCDC120	ENSSSCG00000012288	Uncharacterized protein [Source:UniProtKB/TrEMBL;Acc:F1RW56]	gene	overlapping	37.7266	26.0191	11.7075
Chr16:28997446-29013344	16	28997446	29013344	0.028261414	CCDC152	ENSSSCG00000016867	Uncharacterized protein [Source:UniProtKB/TrEMBL;Acc:F1SMH3]	gene	overlapping	13.7903	27.8205	-14.0302
Chr14:50428387-50433227	14	50428387	50433227	0.028261414	CCDC157	ENSSSCG00000010003	Uncharacterized protein [Source:UniProtKB/TrEMBL;Acc:F1RFD2]	gene	overlapping	18.129	8.27075	9.85825
Chr13:79109989-79115050	13	79109989	79115050	0.028261414	CCDC48	ENSSSCG00000024000	coiled-coil domain containing 48 [Source:HGNC Symbol;Acc:25692]	gene	overlapping	21.8266	10.2337	11.5929
Chr1:114787909-114796524	1	114787909	114796524	0.028261414	CCDC68	ENSSSCG00000004534	Uncharacterized protein [Source:UniProtKB/TrEMBL;Acc:F1S1Z2]	gene	overlapping	22.9168	11.36	11.5568
Chr3:89857632-89869122	3	89857632	89869122	0.028261414	CCDC85A	ENSSSCG00000008396	Uncharacterized protein [Source:UniProtKB/TrEMBL;Acc:F1SQL3]	gene	overlapping	13.7328	4.54732	9.18552
Chr5:48579935-48601147	5	48579935	48601147	0.028261414	CCDC91	ENSSSCG00000000543	Uncharacterized protein [Source:UniProtKB/TrEMBL;Acc:F1SG98]	gene	overlapping	6.42844	18.969	-12.5405
Chr15:26895412-26901404	15	26895412	26901404	0.028261414	CCDC93	ENSSSCG00000015714	Uncharacterized protein [Source:UniProtKB/TrEMBL;Acc:F1RY11]	gene	overlapping	12.6971	5.08854	7.60857
Chr10:36242094-36248717	10	36242094	36248717	0.028261414	CCL19	ENSSSCG00000010966	C-C motif chemokine 19 [Source:RefSeq peptide;Acc:NP_001163987]	gene	downstream	4.57631	15.6929	-11.1166
Chr3:42643828-42645368	3	42643828	42645368	0.028261414	CCNF	ENSSSCG00000026326	cyclin F [Source:HGNC Symbol;Acc:1591]	gene	overlapping	18.4728	31.1442	-12.6714
Chr3:42639894-42642495	3	42639894	42642495	0.028261414	CCNF	ENSSSCG00000026326	cyclin F [Source:HGNC Symbol;Acc:1591]	gene	overlapping	13.7562	24.5601	-10.8038
Chr7:128129503-128131384	7	128129503	128131384	0.028261414	CCNK	ENSSSCG00000002509	Uncharacterized protein [Source:UniProtKB/TrEMBL;Acc:F1SAQ3]	gene	upstream	11.9224	20.5456	-8.62319
Chr3:60666485-60671424	3	60666485	60671424	0.028261414	CD8B	ENSSSCG00000008213	T-cell surface glycoprotein CD8 beta chain [Source:RefSeq peptide;Acc:NP_998927]	gene	overlapping	8.74972	16.3682	-7.61852
Chr9:51633096-51638080	9	51633096	51638080	0.028261414	CD90	ENSSSCG00000015122	thy-1 membrane glycoprotein precursor [Source:RefSeq peptide;Acc:NP_001139601]	gene	upstream	7.55665	16.5423	-8.9856
Chr10:17113206-17114675	10	17113206	17114675	0.037130043	CDC42BPA	ENSSSCG00000010862	Uncharacterized protein [Source:UniProtKB/TrEMBL;Acc:F1S8P5]	gene	overlapping	25.8151	45.2239	-19.4088
Chr7:128836743-128837911	7	128836743	128837911	0.028261414	CDC42BPB	ENSSSCG00000002523	Uncharacterized protein [Source:UniProtKB/TrEMBL;Acc:F1SAM8]	gene	overlapping	44.5349	33.3606	11.1744
Chr17:53983314-53985680	17	53983314	53985680	0.028261414	CDH22	ENSSSCG00000007439	Uncharacterized protein [Source:UniProtKB/TrEMBL;Acc:F1SC52]	gene	overlapping	18.7566	29.4338	-10.6772
Chr14:80339625-80344088	14	80339625	80344088	0.028261414	CDH23	ENSSSCG00000010278	Uncharacterized protein [Source:UniProtKB/TrEMBL;Acc:F1SUA7]	gene	overlapping	5.46438	15.6791	-10.2147
Chr17:68925105-68926850	17	68925105	68926850	0.028261414	CDH4	ENSSSCG00000025784	cadherin 4, type 1, R-cadherin (retinal) [Source:HGNC Symbol;Acc:1763]	gene	overlapping	34.0105	19.7445	14.266
Chr16:18478333-18483840	16	18478333	18483840	0.028261414	CDH6	ENSSSCG00000016806	Uncharacterized protein [Source:UniProtKB/TrEMBL;Acc:F1SP42]	gene	overlapping	8.25853	23.6463	-15.3878
Chr1:173665495-173731223	1	173665495	173731223	0.028261414	CDH7	ENSSSCG00000004886	Uncharacterized protein [Source:UniProtKB/TrEMBL;Acc:F1SMX9]	gene	upstream	5.54399	20.1994	-14.6554
Chr14:92252469-92256798	14	92252469	92256798	0.028261414	CDHR1	ENSSSCG00000010348	Uncharacterized protein [Source:UniProtKB/TrEMBL;Acc:F1SEP9]	gene	overlapping	17.8515	4.456	13.3955
Chr6:58236531-58237889	6	58236531	58237889	0.028261414	CDK11A	ENSSSCG00000003352	cyclin-dependent kinase 11A [Source:HGNC Symbol;Acc:1730]	gene	overlapping	18.8167	35.6997	-16.883
Chr1:292371430-292374513	1	292371430	292374513	0.028261414	CDK5RAP2	ENSSSCG00000005505	Uncharacterized protein [Source:UniProtKB/TrEMBL;Acc:F1SME9]	gene	overlapping	28.3041	17.1447	11.1593
Chr16:51331334-51338463	16	51331334	51338463	0.028261414	CDK7	ENSSSCG00000016961	cell division protein kinase 7 [Source:RefSeq peptide;Acc:NP_001159786]	gene	overlapping	26.7118	3.44828	23.2635
Chr11:3582630-3585169	11	3582630	3585169	0.028261414	CDK8	ENSSSCG00000009298	cyclin-dependent kinase 8 [Source:HGNC Symbol;Acc:1779]	gene	overlapping	21.6406	8.31306	13.3275
Chr7:16909539-16918081	7	16909539	16918081	0.028261414	CDKAL1	ENSSSCG00000001080	Uncharacterized protein [Source:UniProtKB/TrEMBL;Acc:F1RUG0]	gene	overlapping	8.84185	21.0795	-12.2377
Chr7:17069923-17082677	7	17069923	17082677	0.028261414	CDKAL1	ENSSSCG00000001080	Uncharacterized protein [Source:UniProtKB/TrEMBL;Acc:F1RUG0]	gene	overlapping	10.194	17.6681	-7.47402
Chr7:16972451-16980894	7	16972451	16980894	0.028261414	CDKAL1	ENSSSCG00000001080	Uncharacterized protein [Source:UniProtKB/TrEMBL;Acc:F1RUG0]	gene	overlapping	18.05	5.09645	12.9535
Chr8:75379217-75384702	8	75379217	75384702	0.028261414	CDKL2	ENSSSCG00000008970	Uncharacterized protein [Source:UniProtKB/TrEMBL;Acc:F1RYV0]	gene	overlapping	11.3787	1.97951	9.3992
ChrX:16259525-16264360	X	16259525	16264360	0.028261414	CDKL5	ENSSSCG00000012156	Cyclin-dependent kinase-like 5 [Source:UniProtKB/TrEMBL;Acc:E7BUH3]	gene	overlapping	9.06503	23.3802	-14.3152
ChrX:66949133-66966365	X	66949133	66966365	0.028261414	CDX4	ENSSSCG00000021225	caudal type homeobox 4 [Source:HGNC Symbol;Acc:1808]	gene	downstream	29.6147	14.1047	15.51
Chr7:2948837-2951267	7	2948837	2951267	0.028261414	CDYL	ENSSSCG00000000999	chromodomain protein, Y-like [Source:HGNC Symbol;Acc:1811]	gene	overlapping	17.6454	28.5788	-10.9334
Chr6:7677608-7680178	6	7677608	7680178	0.028261414	CDYL2	ENSSSCG00000027458	chromodomain protein, Y-like 2 [Source:HGNC Symbol;Acc:23030]	gene	downstream	29.979	16.1315	13.8475
Chr9:141715755-141725634	9	141715755	141725634	0.028261414	CENPF	ENSSSCG00000015581	Uncharacterized protein [Source:UniProtKB/TrEMBL;Acc:F1S2Y5]	gene	overlapping	17.2032	4.32823	12.875
Chr3:43442255-43451044	3	43442255	43451044	0.028261414	CENPP	ENSSSCG00000008070	centromere protein P [Source:HGNC Symbol;Acc:32933]	gene	overlapping	9.83398	19.4288	-9.59483
Chr2:132260754-132267540	2	132260754	132267540	0.028261414	CEP120	ENSSSCG00000014239	Uncharacterized protein [Source:UniProtKB/TrEMBL;Acc:F1RKN9]	gene	overlapping	11.9386	3.58009	8.35854
Chr8:58257727-58265917	8	58257727	58265917	0.028261414	CEP135	ENSSSCG00000022283	centrosomal protein 135kDa [Source:HGNC Symbol;Acc:29086]	gene	overlapping	23.6729	6.17748	17.4954
Chr5:99146029-99153171	5	99146029	99153171	0.028261414	CEP290	ENSSSCG00000000926	centrosomal protein 290kDa [Source:HGNC Symbol;Acc:29021]	gene	overlapping	21.7133	6.60775	15.1056
Chr13:86873228-86879090	13	86873228	86879090	0.028261414	CEP70	ENSSSCG00000026746	centrosomal protein 70kDa [Source:HGNC Symbol;Acc:29972]	gene	overlapping	28.3405	11.9086	16.4319
Chr15:84294968-84304610	15	84294968	84304610	0.028261414	CERS6	ENSSSCG00000015922	Uncharacterized protein [Source:UniProtKB/TrEMBL;Acc:F1S1W7]	gene	overlapping	26.5095	12.876	13.6335
Chr4:106870214-106873204	4	106870214	106873204	0.028261414	CGN	ENSSSCG00000006621	Uncharacterized protein [Source:UniProtKB/TrEMBL;Acc:F1ST04]	gene	overlapping	18.4285	7.5533	10.8752
Chr18:17096038-17104800	18	17096038	17104800	0.046064813	CHCHD3	ENSSSCG00000016545	coiled-coil-helix-coiled-coil-helix domain-containing protein 3, mitochondrial [Source:RefSeq peptide;Acc:NP_001231105]	gene	overlapping	22.4531	5.55184	16.9012
Chr17:49521983-49526220	17	49521983	49526220	0.028261414	CHD6	ENSSSCG00000007360	Uncharacterized protein [Source:UniProtKB/TrEMBL;Acc:F1SDV1]	gene	overlapping	11.4305	20.8777	-9.44724
Chr17:49518413-49521930	17	49518413	49521930	0.028261414	CHD6	ENSSSCG00000007360	Uncharacterized protein [Source:UniProtKB/TrEMBL;Acc:F1SDV1]	gene	overlapping	24.4254	11.0646	13.3608
Chr9:58421324-58427548	9	58421324	58427548	0.04624448	CHEK1	ENSSSCG00000015215	Uncharacterized protein [Source:UniProtKB/TrEMBL;Acc:F1S774]	gene	overlapping	23.3499	10.7221	12.6278
Chr13:131764730-131768490	13	131764730	131768490	0.028261414	CHRD	ENSSSCG00000025270	chordin [Source:HGNC Symbol;Acc:1949]	gene	overlapping	8.32209	21.9274	-13.6054
Chr9:10068510-10070900	9	10068510	10070900	0.028261414	CHRDL2	ENSSSCG00000014843	Uncharacterized protein [Source:UniProtKB/TrEMBL;Acc:F1SUP9]	gene	overlapping	14.1981	31.8861	-17.688
Chr15:146949355-146952091	15	146949355	146952091	0.028261414	CHRNG	ENSSSCG00000016288	Uncharacterized protein [Source:UniProtKB/TrEMBL;Acc:F1SMT2]	gene	overlapping	19.3492	4.20672	15.1424
Chr5:83416176-83418935	5	83416176	83418935	0.028261414	CHST11	ENSSSCG00000000837	Uncharacterized protein [Source:UniProtKB/TrEMBL;Acc:F1SG44]	gene	overlapping	11.0235	27.2417	-16.2182
Chr6:104459373-104468206	6	104459373	104468206	0.028261414	CHST9	ENSSSCG00000003721	Uncharacterized protein [Source:UniProtKB/TrEMBL;Acc:F1SBA1]	gene	overlapping	7.29871	14.5878	-7.28906
Chr13:20887839-20894756	13	20887839	20894756	0.028261414	CLASP2	ENSSSCG00000011236	Uncharacterized protein [Source:UniProtKB/TrEMBL;Acc:F1RRD7]	gene	overlapping	16.7048	6.05875	10.6461
Chr4:142211891-142215028	4	142211891	142215028	0.030637586	CLCA2	ENSSSCG00000006935	Uncharacterized protein [Source:UniProtKB/TrEMBL;Acc:F1S4C6]	gene	overlapping	12.7241	2.67762	10.0465
ChrX:7412155-7414604	X	7412155	7414604	0.028261414	CLCN4	ENSSSCG00000024809	chloride channel, voltage-sensitive 4 [Source:HGNC Symbol;Acc:2022]	gene	overlapping	11.2688	27.2349	-15.9661
Chr3:32851163-32852839	3	32851163	32852839	0.0339892	CLEC16A	ENSSSCG00000026569	C-type lectin domain family 16, member A [Source:HGNC Symbol;Acc:29013]	gene	overlapping	10.7292	20.8753	-10.1461
Chr9:7659626-7661601	9	7659626	7661601	0.028261414	CLPB	ENSSSCG00000025600	Uncharacterized protein [Source:UniProtKB/TrEMBL;Acc:F1SUV5]	gene	downstream	10.9894	30.6841	-19.6948
Chr13:89282206-89289385	13	89282206	89289385	0.028261414	CLSTN2	ENSSSCG00000011666	Uncharacterized protein [Source:UniProtKB/TrEMBL;Acc:F1SL50]	gene	overlapping	20.7785	11.0756	9.70296
Chr6:151748568-151756038	6	151748568	151756038	0.028261414	CMPK1	ENSSSCG00000003885	UMP-CMP kinase [Source:UniProtKB/Swiss-Prot;Acc:Q29561]	gene	downstream	13.3694	6.53539	6.83398
Chr13:20287074-20293778	13	20287074	20293778	0.028261414	CMTM6	ENSSSCG00000021223	Uncharacterized protein [Source:UniProtKB/TrEMBL;Acc:F1RRE1]	gene	overlapping	12.8495	2.19735	10.6521
Chr10:36365642-36368983	10	36365642	36368983	0.044451505	CNTFR	ENSSSCG00000010974	ciliary neurotrophic factor receptor [Source:HGNC Symbol;Acc:2170]	gene	overlapping	4.25169	20.8856	-16.6339
Chr11:14703058-14708941	11	14703058	14708941	0.028261414	COG6	ENSSSCG00000009369	component of oligomeric golgi complex 6 [Source:HGNC Symbol;Acc:18621]	gene	downstream	16.6482	8.12277	8.52545
Chr14:78808694-78813115	14	78808694	78813115	0.028261414	COL13A1	ENSSSCG00000010256	Uncharacterized protein [Source:UniProtKB/TrEMBL;Acc:F1SUE9]	gene	overlapping	7.57252	17.3647	-9.7922
Chr1:56478221-56492283	1	56478221	56492283	0.028261414	COL19A1	ENSSSCG00000004273	Uncharacterized protein [Source:UniProtKB/TrEMBL;Acc:F1RTT4]	gene	overlapping	15.0113	29.4743	-14.4631
Chr15:142339367-142346850	15	142339367	142346850	0.028261414	COL4A4	ENSSSCG00000016244	collagen, type IV, alpha 4 [Source:HGNC Symbol;Acc:2206]	gene	overlapping	12.8583	23.3345	-10.4762
Chr15:142371235-142375713	15	142371235	142375713	0.028261414	COL4A4	ENSSSCG00000016244	collagen, type IV, alpha 4 [Source:HGNC Symbol;Acc:2206]	gene	overlapping	27.2049	17.5121	9.69284
ChrX:103090927-103094478	X	103090927	103094478	0.031948585	COL4A6	ENSSSCG00000012571	Uncharacterized protein [Source:UniProtKB/TrEMBL;Acc:F1RXI3]	gene	overlapping	12.5958	23.3509	-10.7551
Chr13:34538864-34543068	13	34538864	34543068	0.028261414	COL7A1	ENSSSCG00000011355	Uncharacterized protein [Source:UniProtKB/TrEMBL;Acc:F1SKM1]	gene	overlapping	36.2744	22.9818	13.2925
Chr2:125303059-125313602	2	125303059	125313602	0.028261414	COMMD10	ENSSSCG00000014223	Uncharacterized protein [Source:UniProtKB/TrEMBL;Acc:F1RLE1]	gene	overlapping	8.02755	21.1337	-13.1061
Chr18:19329510-19336070	18	19329510	19336070	0.028261414	COPG2	ENSSSCG00000016553	Coatomer subunit gamma [Source:UniProtKB/TrEMBL;Acc:F6JTE1]	gene	overlapping	17.1317	9.05746	8.07422
Chr15:151263532-151267929	15	151263532	151267929	0.028261414	COPS8	ENSSSCG00000016323	Uncharacterized protein [Source:UniProtKB/TrEMBL;Acc:F1SM07]	gene	downstream	11.141	3.93152	7.20947
Chr8:39558519-39563951	8	39558519	39563951	0.028261414	CORIN	ENSSSCG00000008813	Uncharacterized protein [Source:UniProtKB/TrEMBL;Acc:F1S3S5]	gene	overlapping	3.0082	14.6339	-11.6257
Chr2:3802904-3804733	2	3802904	3804733	0.028261414	CORO1B	ENSSSCG00000012920	coronin, actin binding protein, 1B [Source:HGNC Symbol;Acc:2253]	gene	overlapping	11.8778	3.58408	8.29368
Chr14:120327718-120334635	14	120327718	120334635	0.034850895	COX15	ENSSSCG00000010541	Uncharacterized protein [Source:UniProtKB/TrEMBL;Acc:F1S8W1]	gene	overlapping	26.5772	13.9437	12.6335
Chr13:97404629-97417069	13	97404629	97417069	0.028261414	CP	ENSSSCG00000011700	Uncharacterized protein [Source:UniProtKB/TrEMBL;Acc:F1SKB1]	gene	overlapping	21.7067	12.5666	9.14012
Chr12:48615133-48625470	12	48615133	48625470	0.028261414	CPD	ENSSSCG00000017799	Uncharacterized protein [Source:UniProtKB/TrEMBL;Acc:F1RN68]	gene	overlapping	8.97424	24.0744	-15.1001
Chr8:45472956-45483551	8	45472956	45483551	0.028261414	CPE	ENSSSCG00000008854	carboxypeptidase E [Source:RefSeq peptide;Acc:NP_001090908]	gene	overlapping	11.0537	28.2317	-17.1779
Chr13:693254-701371	13	693254	701371	0.043324575	CPNE4	ENSSSCG00000011178	Uncharacterized protein [Source:UniProtKB/TrEMBL;Acc:F1RX25]	gene	overlapping	19.568	9.94911	9.61886
Chr3:29511802-29514374	3	29511802	29514374	0.042056017	CPPED1	ENSSSCG00000024206	calcineurin-like phosphoesterase domain containing 1 [Source:RefSeq peptide;Acc:NP_001230510]	gene	overlapping	8.8875	28.3177	-19.4302
Chr2:9636828-9645183	2	9636828	9645183	0.028261414	CPSF7	ENSSSCG00000013083	Uncharacterized protein [Source:UniProtKB/TrEMBL;Acc:F1RKQ8]	gene	overlapping	19.6388	6.69639	12.9424
Chr6:146721973-146729676	6	146721973	146729676	0.028261414	CPT2	ENSSSCG00000003851	Uncharacterized protein [Source:UniProtKB/TrEMBL;Acc:F1S764]	gene	overlapping	13.2262	29.3846	-16.1585
Chr14:144961402-144968659	14	144961402	144968659	0.028261414	CPXM2	ENSSSCG00000010728	Uncharacterized protein [Source:UniProtKB/TrEMBL;Acc:F1SEC6]	gene	overlapping	5.36264	15.4515	-10.0889
Chr3:41763259-41764312	3	41763259	41764312	0.028261414	CRAMP1L	ENSSSCG00000008026	Uncharacterized protein [Source:UniProtKB/TrEMBL;Acc:F1RG01]	gene	overlapping	32.1804	18.7562	13.4242
Chr3:41731817-41733207	3	41731817	41733207	0.03989022	CRAMP1L	ENSSSCG00000008026	Uncharacterized protein [Source:UniProtKB/TrEMBL;Acc:F1RG01]	gene	overlapping	27.4156	11.4387	15.977
Chr1:303407596-303409024	1	303407596	303409024	0.028261414	CRAT	ENSSSCG00000005671	carnitine O-acetyltransferase [Source:RefSeq peptide;Acc:NP_001106518]	gene	overlapping	21.3859	33.6717	-12.2858
Chr15:122402650-122410163	15	122402650	122410163	0.028261414	CREB1	ENSSSCG00000016138	cyclic AMP-responsive element-binding protein 1 [Source:RefSeq peptide;Acc:NP_001093399]	gene	overlapping	2.28122	16.6955	-14.4142
Chr3:110463731-110473755	3	110463731	110473755	0.028261414	CRIM1	ENSSSCG00000008504	Uncharacterized protein [Source:UniProtKB/TrEMBL;Acc:F1S412]	gene	overlapping	21.5603	9.98729	11.573
Chr6:4417157-4418710	6	4417157	4418710	0.028261414	CRISPLD2	ENSSSCG00000002669	Uncharacterized protein [Source:UniProtKB/TrEMBL;Acc:F1S5V1]	gene	overlapping	24.1389	15.7853	8.35369
Chr6:4441258-4443528	6	4441258	4443528	0.028261414	CRISPLD2	ENSSSCG00000002669	Uncharacterized protein [Source:UniProtKB/TrEMBL;Acc:F1S5V1]	gene	overlapping	32.0833	15.395	16.6883
Chr2:157409123-157413488	2	157409123	157413488	0.028261414	CSNK1A1	ENSSSCG00000014435	Casein kinase I isoform alpha [Source:UniProtKB/Swiss-Prot;Acc:O19175]	gene	overlapping	16.3556	6.57664	9.779
Chr1:311581810-311584542	1	311581810	311584542	0.028261414	CTDP1	ENSSSCG00000005787	Uncharacterized protein [Source:UniProtKB/TrEMBL;Acc:F1RWS7]	gene	overlapping	27.1477	19.3955	7.75214
Chr1:107925455-107930507	1	107925455	107930507	0.028261414	CTIF	ENSSSCG00000004506	Uncharacterized protein [Source:UniProtKB/TrEMBL;Acc:F1RPR2]	gene	overlapping	23.9915	37.9211	-13.9296
Chr1:107678276-107708083	1	107678276	107708083	0.028261414	CTIF	ENSSSCG00000004506	Uncharacterized protein [Source:UniProtKB/TrEMBL;Acc:F1RPR2]	gene	overlapping	23.4064	13.4059	10.0005
Chr2:146625041-146626149	2	146625041	146626149	0.032100596	CTNNA1	ENSSSCG00000014339	Uncharacterized protein [Source:UniProtKB/TrEMBL;Acc:F1RGJ2]	gene	upstream	30.8022	51.656	-20.8538
Chr3:67390170-67405072	3	67390170	67405072	0.028261414	CTNNA2	ENSSSCG00000008254	Uncharacterized protein [Source:UniProtKB/TrEMBL;Acc:F1SNX3]	gene	overlapping	14.5416	4.93551	9.6061
Chr9:120417033-120423349	9	120417033	120423349	0.028261414	CUL1	ENSSSCG00000015455	Uncharacterized protein [Source:UniProtKB/TrEMBL;Acc:F1SAD7]	gene	overlapping	22.5858	10.1425	12.4434
Chr11:86162299-86163856	11	86162299	86163856	0.028261414	CUL4A	ENSSSCG00000009556	Uncharacterized protein [Source:UniProtKB/TrEMBL;Acc:F1RN43]	gene	overlapping	13.1433	22.4014	-9.25813
Chr9:40496974-40506265	9	40496974	40506265	0.028261414	CUL5	ENSSSCG00000029198	cullin 5 [Source:HGNC Symbol;Acc:2556]	gene	overlapping	17.1538	8.65495	8.49886
ChrX:35347514-35356997	X	35347514	35356997	0.028261414	CXorf22	ENSSSCG00000012219	chromosome X open reading frame 22 [Source:HGNC Symbol;Acc:28546]	gene	overlapping	16.5146	38.8848	-22.3702
Chr5:3616415-3618101	5	3616415	3618101	0.028261414	CYB5R3	ENSSSCG00000000038	NADH-cytochrome b5 reductase 3 [Source:UniProtKB/Swiss-Prot;Acc:P83686]	gene	overlapping	25.5643	16.126	9.43836
ChrX:37375328-37380841	X	37375328	37380841	0.028261414	CYBB	ENSSSCG00000012229	Cytochrome b-245 heavy chain [Source:UniProtKB/Swiss-Prot;Acc:P52649]	gene	overlapping	13.752	4.41297	9.33901
Chr4:428374-430504	4	428374	430504	0.028261414	CYHR1	ENSSSCG00000027076	Uncharacterized protein [Source:UniProtKB/TrEMBL;Acc:F1RSP2]	gene	overlapping	14.3669	27.1975	-12.8306
Chr18:10330282-10334348	18	10330282	10334348	0.028261414	CYP5A1V2	ENSSSCG00000016504	Thromboxane-A synthase [Source:UniProtKB/Swiss-Prot;Acc:P47787]	gene	overlapping	18.3158	26.2499	-7.93415
Chr4:75956374-75964759	4	75956374	75964759	0.028261414	CYP7B1	ENSSSCG00000022092	Uncharacterized protein [Source:UniProtKB/TrEMBL;Acc:F1RTA9]	gene	overlapping	19.736	2.9992	16.7368
Chr1:209515390-209528789	1	209515390	209528789	0.028261414	DAAM1	ENSSSCG00000005078	Uncharacterized protein [Source:UniProtKB/TrEMBL;Acc:F1SSJ8]	gene	overlapping	21.0185	9.50008	11.5184
Chr1:209507758-209515382	1	209507758	209515382	0.028261414	DAAM1	ENSSSCG00000005078	Uncharacterized protein [Source:UniProtKB/TrEMBL;Acc:F1SSJ8]	gene	overlapping	25.2614	5.92944	19.3319
Chr15:28585980-28592513	15	28585980	28592513	0.028261414	DBI	ENSSSCG00000023435	Acyl-CoA-binding protein DBI(32-86) [Source:UniProtKB/Swiss-Prot;Acc:P12026]	gene	upstream	14.8652	4.75791	10.1073
Chr6:189594-191063	6	189594	191063	0.028261414	DBNDD1	ENSSSCG00000002637	Uncharacterized protein [Source:UniProtKB/TrEMBL;Acc:F1S6N9]	gene	overlapping	27.1985	16.9094	10.2891
Chr4:129543165-129550607	4	129543165	129550607	0.028261414	DBT	ENSSSCG00000006866	Uncharacterized protein [Source:UniProtKB/TrEMBL;Acc:F1S563]	gene	overlapping	4.85853	19.768	-14.9095
Chr10:36861807-36868766	10	36861807	36868766	0.028261414	DCAF12	ENSSSCG00000010986	Uncharacterized protein [Source:UniProtKB/TrEMBL;Acc:F1SEA7]	gene	overlapping	21.0384	7.1042	13.9342
Chr11:11840084-11842761	11	11840084	11842761	0.04115968	DCLK1	ENSSSCG00000009352	Uncharacterized protein [Source:UniProtKB/TrEMBL;Acc:F1RSR2]	gene	overlapping	12.8446	32.9674	-20.1227
Chr2:121392121-121403045	2	121392121	121403045	0.028752808	DCP2	ENSSSCG00000014204	Uncharacterized protein [Source:UniProtKB/TrEMBL;Acc:F1RLG8]	gene	overlapping	38.1562	23.635	14.5211
Chr15:51055379-51059859	15	51055379	51059859	0.028261414	DCTD	ENSSSCG00000015775	Uncharacterized protein [Source:UniProtKB/TrEMBL;Acc:F1RT14]	gene	overlapping	16.9215	9.73965	7.18183
Chr8:41181791-41189266	8	41181791	41189266	0.028261414	DCUN1D4	ENSSSCG00000008831	Uncharacterized protein [Source:UniProtKB/TrEMBL;Acc:F1SE79]	gene	overlapping	20.2963	6.00932	14.287
Chr7:27109602-27112850	7	27109602	27112850	0.028261414	DDR	ENSSSCG00000001382	epithelial discoidin domain-containing receptor 1 [Source:RefSeq peptide;Acc:NP_001116577]	gene	overlapping	35.9022	18.9891	16.9131
Chr5:69626286-69628969	5	69626286	69628969	0.028261414	DDX11	ENSSSCG00000000745	Uncharacterized protein [Source:UniProtKB/TrEMBL;Acc:F1SK84]	gene	overlapping	15.6931	23.0389	-7.34575
Chr1:306466386-306467977	1	306466386	306467977	0.032224186	DDX31	ENSSSCG00000005729	DEAD (Asp-Glu-Ala-Asp) box polypeptide 31 [Source:HGNC Symbol;Acc:16715]	gene	overlapping	12.2414	28.9629	-16.7215
Chr1:306452666-306454619	1	306452666	306454619	0.028261414	DDX31	ENSSSCG00000005729	DEAD (Asp-Glu-Ala-Asp) box polypeptide 31 [Source:HGNC Symbol;Acc:16715]	gene	overlapping	22.4134	36.4641	-14.0507
Chr6:45636328-45639775	6	45636328	45639775	0.048989777	DEDD2	ENSSSCG00000030182	death effector domain containing 2 [Source:HGNC Symbol;Acc:24450]	gene	overlapping	19.9801	8.09752	11.8826
Chr4:2043224-2044181	4	2043224	2044181	0.028261414	DENND3	ENSSSCG00000025283	Uncharacterized protein [Source:UniProtKB/TrEMBL;Acc:F1RSK6]	gene	overlapping	13.6067	25.4904	-11.8837
Chr1:227242827-227250543	1	227242827	227250543	0.028261414	DENND4C	ENSSSCG00000005170	Uncharacterized protein [Source:UniProtKB/TrEMBL;Acc:F1SNF8]	gene	overlapping	12.6581	2.87548	9.78265
Chr4:17235628-17238072	4	17235628	17238072	0.030752173	DERL1	ENSSSCG00000021004	derlin-1 [Source:RefSeq peptide;Acc:NP_001231408]	gene	overlapping	11.125	26.7779	-15.6528
ChrX:63434280-63445450	X	63434280	63445450	0.028261414	DGAT2L6	ENSSSCG00000012381	Uncharacterized protein [Source:UniProtKB/TrEMBL;Acc:F1RTK7]	gene	upstream	6.84983	15.5698	-8.71997
Chr18:12691096-12696303	18	12691096	12696303	0.037560456	DGKI	ENSSSCG00000016521	Uncharacterized protein [Source:UniProtKB/TrEMBL;Acc:F1SNJ3]	gene	overlapping	7.50572	22.7712	-15.2655
Chr2:17485241-17487254	2	17485241	17487254	0.028261414	DGKZ	ENSSSCG00000013259	Uncharacterized protein [Source:UniProtKB/TrEMBL;Acc:F1SIA1]	gene	overlapping	28.3015	15.9189	12.3826
Chr6:145542684-145547460	6	145542684	145547460	0.040128484	DHCR24	ENSSSCG00000027525	24-dehydrocholesterol reductase [Source:RefSeq peptide;Acc:NP_001230283]	gene	downstream	14.6077	3.46802	11.1397
Chr6:50109354-50113809	6	50109354	50113809	0.028261414	DHDH	ENSSSCG00000003158	Trans-1,2-dihydrobenzene-1,2-diol dehydrogenase [Source:UniProtKB/Swiss-Prot;Acc:Q9TV69]	gene	overlapping	19.6037	5.29207	14.3116
Chr14:118473180-118477447	14	118473180	118477447	0.037343834	DHDPSL	ENSSSCG00000010523	probable 4-hydroxy-2-oxoglutarate aldolase, mitochondrial [Source:RefSeq peptide;Acc:NP_001177098]	gene	overlapping	11.0518	25.3777	-14.3259
Chr12:19887202-19889907	12	19887202	19889907	0.028261414	DHX8	ENSSSCG00000017378	DEAH (Asp-Glu-Ala-His) box polypeptide 8 [Source:HGNC Symbol;Acc:2749]	gene	overlapping	5.86303	20.1411	-14.2781
Chr5:17103031-17110234	5	17103031	17110234	0.028261414	DIP2B	ENSSSCG00000029196	DIP2 disco-interacting protein 2 homolog B (Drosophila) [Source:HGNC Symbol;Acc:29284]	gene	overlapping	16.7084	5.43806	11.2703
Chr5:17084516-17090592	5	17084516	17090592	0.028261414	DIP2B	ENSSSCG00000029196	DIP2 disco-interacting protein 2 homolog B (Drosophila) [Source:HGNC Symbol;Acc:29284]	gene	overlapping	22.4938	8.01258	14.4812
ChrX:143261498-143263562	X	143261498	143263562	0.028261414	DKC1	ENSSSCG00000012823	H/ACA ribonucleoprotein complex subunit 4 [Source:RefSeq peptide;Acc:NP_001136140]	gene	overlapping	30.7156	14.0995	16.6161
Chr13:25162796-25166560	13	25162796	25166560	0.049649518	DLEC1	ENSSSCG00000011249	Uncharacterized protein [Source:UniProtKB/TrEMBL;Acc:F1RRB8]	gene	overlapping	25.597	12.0328	13.5642
Chr14:144002653-144069139	14	144002653	144069139	0.028261414	DMBT1	ENSSSCG00000010718	deleted in malignant brain tumors 1 [Source:HGNC Symbol;Acc:2926]	gene	overlapping	6.32243	17.9198	-11.5974
ChrX:29398429-29410865	X	29398429	29410865	0.028261414	DMD	ENSSSCG00000012205	Dystrophin [Source:UniProtKB/TrEMBL;Acc:F1SPU7]	gene	overlapping	23.8691	7.09954	16.7696
Chr14:30826005-30831295	14	30826005	30831295	0.028261414	DNAH10	ENSSSCG00000009765	Uncharacterized protein [Source:UniProtKB/TrEMBL;Acc:F1RFM8]	gene	overlapping	8.1408	18.5468	-10.406
Chr9:100023744-100030102	9	100023744	100030102	0.028261414	DNAH11	ENSSSCG00000015379	Uncharacterized protein [Source:UniProtKB/TrEMBL;Acc:F1SC07]	gene	overlapping	13.201	25.6657	-12.4647
Chr12:6781953-6784986	12	6781953	6784986	0.028261414	DNAI2	ENSSSCG00000024357	dynein, axonemal, intermediate chain 2 [Source:HGNC Symbol;Acc:18744]	gene	overlapping	15.3707	6.19076	9.17996
Chr1:283205740-283217969	1	283205740	283217969	0.028261414	DNAJC25	ENSSSCG00000005460	Uncharacterized protein [Source:UniProtKB/TrEMBL;Acc:F1SNC4]	gene	overlapping	9.61321	20.2252	-10.612
Chr1:302662364-302666210	1	302662364	302666210	0.028261414	DNM1	ENSSSCG00000005641	dynamin 1 [Source:HGNC Symbol;Acc:2972]	gene	overlapping	13.2015	2.58098	10.6205
Chr2:69315062-69319726	2	69315062	69319726	0.028261414	DNMT1	ENSSSCG00000013659	DNA (cytosine-5)-methyltransferase 1 [Source:RefSeq peptide;Acc:NP_001027526]	gene	overlapping	5.38058	17.0524	-11.6718
Chr13:217006284-217008078	13	217006284	217008078	0.028261414	DNMT3L	ENSSSCG00000028741	DNA (cytosine-5-)-methyltransferase 3-like [Source:HGNC Symbol;Acc:2980]	gene	overlapping	3.10609	12.6006	-9.49446
Chr6:138070684-138082774	6	138070684	138082774	0.028261414	DOCK7	ENSSSCG00000003818	Uncharacterized protein [Source:UniProtKB/TrEMBL;Acc:F1S7Z8]	gene	overlapping	26.9112	16.3752	10.536
Chr13:209903888-209907388	13	209903888	209907388	0.028261414	DOPEY2	ENSSSCG00000012054	Uncharacterized protein [Source:UniProtKB/TrEMBL;Acc:F1SGX3]	gene	overlapping	16.8038	8.18557	8.61818
Chr6:486448-487967	6	486448	487967	0.033232503	DPEP1	ENSSSCG00000021971	Dipeptidase 1 [Source:UniProtKB/Swiss-Prot;Acc:P22412]	gene	upstream	16.1806	33.4283	-17.2478
Chr18:42677187-42689764	18	42677187	42689764	0.028261414	DPY19L1	ENSSSCG00000027063	dpy-19-like 1 (C. elegans) [Source:HGNC Symbol;Acc:22205]	gene	overlapping	19.4139	7.37078	12.0432
Chr4:132077219-132090709	4	132077219	132090709	0.028261414	DPYD	ENSSSCG00000006878	Dihydropyrimidine dehydrogenase [NADP(+)] [Source:UniProtKB/Swiss-Prot;Acc:Q28943]	gene	overlapping	12.3825	2.19149	10.191
Chr4:35607003-35613340	4	35607003	35613340	0.028261414	DPYS	ENSSSCG00000006040	Uncharacterized protein [Source:UniProtKB/TrEMBL;Acc:F1S1E7]	gene	overlapping	9.30686	23.06	-13.7531
Chr14:152342630-152343680	14	152342630	152343680	0.028261414	DPYSL4	ENSSSCG00000010762	Uncharacterized protein [Source:UniProtKB/TrEMBL;Acc:F1SDI9]	gene	overlapping	10.55	26.9327	-16.3827
Chr13:213720149-213722626	13	213720149	213722626	0.028261414	DSCAM	ENSSSCG00000012072	Uncharacterized protein [Source:UniProtKB/TrEMBL;Acc:F1SGT6]	gene	overlapping	6.07564	21.4193	-15.3437
Chr13:213936855-213941597	13	213936855	213941597	0.028261414	DSCAM	ENSSSCG00000012072	Uncharacterized protein [Source:UniProtKB/TrEMBL;Acc:F1SGT6]	gene	overlapping	20.9909	3.57433	17.4165
Chr7:33606052-33608106	7	33606052	33608106	0.028261414	DST	ENSSSCG00000001499	Uncharacterized protein [Source:UniProtKB/TrEMBL;Acc:F1RZU8]	gene	overlapping	15.2139	28.7719	-13.558
Chr7:33639939-33643980	7	33639939	33643980	0.028261414	DST	ENSSSCG00000001499	Uncharacterized protein [Source:UniProtKB/TrEMBL;Acc:F1RZU8]	gene	overlapping	29.581	12.1734	17.4076
Chr17:30336286-30344736	17	30336286	30344736	0.028261414	DTD1	ENSSSCG00000007098	D-tyrosyl-tRNA deacylase 1 homolog (S. cerevisiae) [Source:HGNC Symbol;Acc:16219]	gene	overlapping	10.9951	21.054	-10.0589
Chr7:12203235-12204993	7	12203235	12204993	0.03278189	DTNBP1	ENSSSCG00000001062	dysbindin [Source:RefSeq peptide;Acc:NP_001092070]	gene	overlapping	17.4776	37.4715	-19.9939
Chr7:12202185-12203234	7	12202185	12203234	0.028261414	DTNBP1	ENSSSCG00000001062	dysbindin [Source:RefSeq peptide;Acc:NP_001092070]	gene	overlapping	23.1069	39.14	-16.033
Chr7:12233362-12238442	7	12233362	12238442	0.028261414	DTNBP1	ENSSSCG00000001062	dysbindin [Source:RefSeq peptide;Acc:NP_001092070]	gene	overlapping	20.5449	5.53255	15.0123
Chr10:13009638-13013182	10	13009638	13013182	0.028261414	DUSP10	ENSSSCG00000010831	Uncharacterized protein [Source:UniProtKB/TrEMBL;Acc:F1S9I4]	gene	overlapping	14.4436	32.2953	-17.8516
Chr12:40613797-40618997	12	40613797	40618997	0.028261414	DUSP14	ENSSSCG00000029874	dual specificity phosphatase 14 [Source:HGNC Symbol;Acc:17007]	gene	overlapping	27.62	13.873	13.747
Chr13:131522254-131525700	13	131522254	131525700	0.028261414	DVL3	ENSSSCG00000025374	dishevelled, dsh homolog 3 (Drosophila) [Source:HGNC Symbol;Acc:3087]	gene	overlapping	18.8122	29.8006	-10.9885
Chr13:159978675-159998602	13	159978675	159998602	0.033796262	DZIP3	ENSSSCG00000011940	Uncharacterized protein [Source:UniProtKB/TrEMBL;Acc:F1SL40]	gene	overlapping	24.7505	12.8253	11.9252
Chr17:42121489-42125169	17	42121489	42125169	0.028261414	E2F1	ENSSSCG00000007268	Uncharacterized protein [Source:UniProtKB/TrEMBL;Acc:F1S4Z6]	gene	overlapping	11.4872	19.9689	-8.48164
Chr3:134081293-134083045	3	134081293	134083045	0.028261414	E2F6	ENSSSCG00000026161	Uncharacterized protein [Source:UniProtKB/TrEMBL;Acc:F1SCR2]	gene	overlapping	7.91981	19.7053	-11.7855
Chr2:43172862-43179443	2	43172862	43179443	0.028261414	E2F8	ENSSSCG00000013352	E2F transcription factor 8 [Source:HGNC Symbol;Acc:24727]	gene	overlapping	6.80768	21.5758	-14.7681
Chr14:11165407-11175090	14	11165407	11175090	0.028261414	EBF2	ENSSSCG00000009655	Uncharacterized protein [Source:UniProtKB/TrEMBL;Acc:F2Z510]	gene	overlapping	19.37	9.78158	9.58847
Chr14:151008150-151009658	14	151008150	151009658	0.028261414	EBF3	ENSSSCG00000010757	early B-cell factor 3 [Source:HGNC Symbol;Acc:19087]	gene	overlapping	9.25596	28.9175	-19.6616
Chr17:66867822-66870140	17	66867822	66870140	0.028261414	EDN3	ENSSSCG00000007527	Endothelin-3 [Source:UniProtKB/Swiss-Prot;Acc:A5A752]	gene	overlapping	10.6774	20.8048	-10.1274
Chr4:1040491-1041250	4	1040491	1041250	0.028261414	EEF1D	ENSSSCG00000006954	Uncharacterized protein [Source:UniProtKB/TrEMBL;Acc:F1SEV8]	gene	overlapping	26.086	63.2	-37.114
Chr3:24332847-24337697	3	24332847	24337697	0.028261414	EEF2K	ENSSSCG00000007839	Uncharacterized protein [Source:UniProtKB/TrEMBL;Acc:F1RPE8]	gene	overlapping	24.659	34.2209	-9.56188
Chr3:90141398-90160138	3	90141398	90160138	0.028261414	EFEMP1	ENSSSCG00000008397	EGF-containing fibulin-like extracellular matrix protein 1 [Source:RefSeq peptide;Acc:NP_001231190]	gene	overlapping	10.0524	21.8224	-11.77
Chr3:90193707-90206527	3	90193707	90206527	0.028261414	EFEMP1	ENSSSCG00000008397	EGF-containing fibulin-like extracellular matrix protein 1 [Source:RefSeq peptide;Acc:NP_001231190]	gene	overlapping	25.8951	8.87895	17.0162
Chr11:539790-540561	11	539790	540561	0.038332373	EFHA1	ENSSSCG00000024667	EF-hand domain family, member A1 [Source:HGNC Symbol;Acc:31830]	gene	overlapping	16.7634	38.491	-21.7276
Chr11:552250-556619	11	552250	556619	0.03297895	EFHA1	ENSSSCG00000024667	EF-hand domain family, member A1 [Source:HGNC Symbol;Acc:31830]	gene	overlapping	13.7071	28.7258	-15.0187
Chr11:543501-548544	11	543501	548544	0.028261414	EFHA1	ENSSSCG00000024667	EF-hand domain family, member A1 [Source:HGNC Symbol;Acc:31830]	gene	overlapping	12.9216	25.9187	-12.997
Chr17:5209092-5229481	17	5209092	5229481	0.03071856	EFHA2	ENSSSCG00000006981	Uncharacterized protein [Source:UniProtKB/TrEMBL;Acc:F1SET8]	gene	overlapping	19.7718	7.90183	11.87
Chr4:2372102-2374368	4	2372102	2374368	0.028261414	EIF2C2	ENSSSCG00000005935	protein argonaute-2 [Source:RefSeq peptide;Acc:NP_001181904]	gene	overlapping	8.85473	25.3328	-16.478
Chr6:25130094-25132384	6	25130094	25132384	0.028261414	ELMO3	ENSSSCG00000002786	Uncharacterized protein [Source:UniProtKB/TrEMBL;Acc:F1RFW8]	gene	overlapping	5.98061	19.6888	-13.7082
Chr7:8008089-8010334	7	8008089	8010334	0.04035944	ELOVL2	ENSSSCG00000001045	Uncharacterized protein [Source:UniProtKB/TrEMBL;Acc:F1RV87]	gene	overlapping	14.1901	27.3963	-13.2062
Chr3:119032433-119034177	3	119032433	119034177	0.028261414	EMILIN1	ENSSSCG00000008557	Uncharacterized protein [Source:UniProtKB/TrEMBL;Acc:F1SDQ5]	gene	overlapping	14.754	3.84577	10.9082
Chr2:72699854-72709460	2	72699854	72709460	0.028261414	EMR1	ENSSSCG00000013556	Uncharacterized protein [Source:UniProtKB/TrEMBL;Acc:F1SCM7]	gene	overlapping	19.8034	28.5399	-8.73648
Chr2:85275035-85278696	2	85275035	85278696	0.028261414	ENC1	ENSSSCG00000014072	Uncharacterized protein [Source:UniProtKB/TrEMBL;Acc:F1S2J9]	gene	overlapping	9.11464	21.9713	-12.8567
Chr14:138364960-138371841	14	138364960	138371841	0.028261414	ENO4	ENSSSCG00000010664	Uncharacterized protein [Source:UniProtKB/TrEMBL;Acc:F1S4S3]	gene	overlapping	12.4993	3.76924	8.73006
Chr11:24438513-24446892	11	24438513	24446892	0.028261414	ENOX1	ENSSSCG00000021818	ecto-NOX disulfide-thiol exchanger 1 [Source:HGNC Symbol;Acc:25474]	gene	overlapping	13.7932	29.5571	-15.7639
Chr11:24250696-24255020	11	24250696	24255020	0.03388226	ENOX1	ENSSSCG00000021818	ecto-NOX disulfide-thiol exchanger 1 [Source:HGNC Symbol;Acc:25474]	gene	overlapping	37.6097	14.9012	22.7085
ChrX:122855395-122869329	X	122855395	122869329	0.028261414	ENOX2	ENSSSCG00000012663	Uncharacterized protein [Source:UniProtKB/TrEMBL;Acc:F1RTG1]	gene	overlapping	9.0476	27.189	-18.1414
Chr8:119995194-120005458	8	119995194	120005458	0.028261414	ENPEP	ENSSSCG00000009132	Glutamyl aminopeptidase [Source:UniProtKB/Swiss-Prot;Acc:Q95334]	gene	overlapping	11.4731	23.2577	-11.7846
Chr5:1391215-1409940	5	1391215	1409940	0.028261414	ENSSSCG00000000017	ENSSSCG00000000017	Uncharacterized protein [Source:UniProtKB/TrEMBL;Acc:F1SM60]	gene	overlapping	24.6101	7.70881	16.9013
Chr5:21941429-21954564	5	21941429	21954564	0.028261414	ENSSSCG00000000333	ENSSSCG00000000333	Uncharacterized protein [Source:UniProtKB/TrEMBL;Acc:F1SQC9]	gene	overlapping	20.3468	7.94855	12.3982
Chr5:24322623-24324431	5	24322623	24324431	0.028261414	ENSSSCG00000000423	ENSSSCG00000000423	No description	gene	overlapping	12.6427	27.3543	-14.7116
Chr7:9811052-9815785	7	9811052	9815785	0.028261414	ENSSSCG00000001052	ENSSSCG00000001052	Uncharacterized protein [Source:UniProtKB/TrEMBL;Acc:F1RV81]	gene	overlapping	14.127	26.5164	-12.3893
Chr7:61117351-61121178	7	61117351	61121178	0.028261414	ENSSSCG00000001863	ENSSSCG00000001863	Uncharacterized protein [Source:UniProtKB/TrEMBL;Acc:F1SJX0]	gene	overlapping	5.1818	15.5959	-10.4141
Chr7:83558308-83566973	7	83558308	83566973	0.028261414	ENSSSCG00000002142	ENSSSCG00000002142	Uncharacterized protein [Source:UniProtKB/TrEMBL;Acc:F1S8G0]	gene	overlapping	21.3147	13.3197	7.99508
Chr7:134321266-134329854	7	134321266	134329854	0.028261414	ENSSSCG00000002626	ENSSSCG00000002626	Glutathione S-transferase [Source:UniProtKB/TrEMBL;Acc:F1S7C9]	gene	overlapping	10.3699	24.1747	-13.8047
Chr6:27347531-27361724	6	27347531	27361724	0.031542316	ENSSSCG00000002826	ENSSSCG00000002826	Uncharacterized protein [Source:UniProtKB/TrEMBL;Acc:F1RF14]	gene	overlapping	27.8893	7.38938	20.4999
Chr6:75711311-75714774	6	75711311	75714774	0.04115438	ENSSSCG00000003540	ENSSSCG00000003540	Uncharacterized protein [Source:UniProtKB/TrEMBL;Acc:F1STV9]	gene	overlapping	16.0498	3.29337	12.7564
Chr6:91839906-91846224	6	91839906	91846224	0.028261414	ENSSSCG00000003679	ENSSSCG00000003679	No description	gene	overlapping	5.88458	21.9451	-16.0605
Chr6:155544738-155551979	6	155544738	155551979	0.028261414	ENSSSCG00000003956	ENSSSCG00000003956	Uncharacterized protein [Source:UniProtKB/TrEMBL;Acc:F1SFB5]	gene	overlapping	22.1086	12.1401	9.96852
Chr6:157228871-157230382	6	157228871	157230382	0.033530064	ENSSSCG00000003971	ENSSSCG00000003971	No description	gene	overlapping	19.3188	37.8462	-18.5274
Chr1:1074909-1076524	1	1074909	1076524	0.028261414	ENSSSCG00000004008	ENSSSCG00000004008	No description	gene	overlapping	20.0387	33.7033	-13.6646
Chr1:1082479-1085918	1	1082479	1085918	0.028261414	ENSSSCG00000004008	ENSSSCG00000004008	No description	gene	overlapping	15.8617	24.8585	-8.99682
Chr1:8323796-8327917	1	8323796	8327917	0.038438626	ENSSSCG00000004034	ENSSSCG00000004034	Uncharacterized protein [Source:UniProtKB/TrEMBL;Acc:F1SB84]	gene	upstream	18.5661	49.3608	-30.7947
Chr1:8316420-8319631	1	8316420	8319631	0.028261414	ENSSSCG00000004034	ENSSSCG00000004034	Uncharacterized protein [Source:UniProtKB/TrEMBL;Acc:F1SB84]	gene	overlapping	13.5102	30.7642	-17.254
Chr1:8521813-8525003	1	8521813	8525003	0.028261414	ENSSSCG00000004037	ENSSSCG00000004037	No description	gene	overlapping	12.6986	33.0874	-20.3888
Chr1:16473707-16478061	1	16473707	16478061	0.028261414	ENSSSCG00000004082	ENSSSCG00000004082	No description	gene	overlapping	26.0306	11.0059	15.0247
Chr1:36003230-36009628	1	36003230	36009628	0.028261414	ENSSSCG00000004199	ENSSSCG00000004199	No description	gene	overlapping	30.9956	9.804	21.1916
Chr1:101794056-101807251	1	101794056	101807251	0.028261414	ENSSSCG00000004484	ENSSSCG00000004484	Uncharacterized protein [Source:UniProtKB/TrEMBL;Acc:F1RQI0]	gene	overlapping	17.5527	4.77026	12.7825
Chr1:155810189-155815799	1	155810189	155815799	0.028261414	ENSSSCG00000004823	ENSSSCG00000004823	Uncharacterized protein [Source:UniProtKB/TrEMBL;Acc:F1SR93]	gene	overlapping	7.31763	18.9215	-11.6038
Chr1:155683754-155689536	1	155683754	155689536	0.028261414	ENSSSCG00000004823	ENSSSCG00000004823	Uncharacterized protein [Source:UniProtKB/TrEMBL;Acc:F1SR93]	gene	overlapping	4.66917	13.6521	-8.98295
Chr1:188601972-188626700	1	188601972	188626700	0.028261414	ENSSSCG00000004989	ENSSSCG00000004989	Uncharacterized protein [Source:UniProtKB/TrEMBL;Acc:F1SIP8]	gene	overlapping	10.0511	20.7313	-10.6802
Chr1:209026271-209037648	1	209026271	209037648	0.028261414	ENSSSCG00000005077	ENSSSCG00000005077	Uncharacterized protein [Source:UniProtKB/TrEMBL;Acc:F1SSJ9]	gene	overlapping	9.81603	20.9391	-11.123
Chr1:286134848-286139745	1	286134848	286139745	0.028261414	ENSSSCG00000005487	ENSSSCG00000005487	No description	gene	overlapping	14.0563	4.33164	9.7247
Chr1:294684567-294690220	1	294684567	294690220	0.028261414	ENSSSCG00000005532	ENSSSCG00000005532	Uncharacterized protein [Source:UniProtKB/TrEMBL;Acc:F1SLQ7]	gene	overlapping	14.9918	5.3691	9.6227
Chr17:12936569-12965531	17	12936569	12965531	0.028261414	ENSSSCG00000007025	ENSSSCG00000007025	No description	gene	overlapping	23.6604	11.9366	11.7238
Chr17:33031853-33034998	17	33031853	33034998	0.028261414	ENSSSCG00000007108	ENSSSCG00000007108	Uncharacterized protein [Source:UniProtKB/TrEMBL;Acc:F1SAU6]	gene	overlapping	7.68391	25.1544	-17.4705
Chr17:41810768-41819611	17	41810768	41819611	0.028261414	ENSSSCG00000007263	ENSSSCG00000007263	Uncharacterized protein [Source:UniProtKB/TrEMBL;Acc:F1S501]	gene	overlapping	8.22138	20.4812	-12.2599
Chr3:5237775-5240136	3	5237775	5240136	0.028261414	ENSSSCG00000007589	ENSSSCG00000007589	Uncharacterized protein [Source:UniProtKB/TrEMBL;Acc:F1RFN1]	gene	overlapping	8.07102	23.5023	-15.4313
Chr3:6693861-6698028	3	6693861	6698028	0.028261414	ENSSSCG00000007622	ENSSSCG00000007622	Uncharacterized protein [Source:UniProtKB/TrEMBL;Acc:F1RNS9]	gene	overlapping	14.2229	3.82007	10.4028
Chr3:7416456-7424264	3	7416456	7424264	0.028261414	ENSSSCG00000007644	ENSSSCG00000007644	Uncharacterized protein [Source:UniProtKB/TrEMBL;Acc:F1RNP0]	gene	overlapping	22.5389	11.7788	10.7601
Chr3:15439358-15443292	3	15439358	15443292	0.028261414	ENSSSCG00000007728	ENSSSCG00000007728	No description	gene	upstream	13.8257	35.1748	-21.3491
Chr3:24617430-24621488	3	24617430	24621488	0.028261414	ENSSSCG00000007841	ENSSSCG00000007841	No description	gene	overlapping	25.2938	13.6577	11.6361
Chr3:26139724-26144496	3	26139724	26144496	0.028261414	ENSSSCG00000007858	ENSSSCG00000007858	Uncharacterized protein [Source:UniProtKB/TrEMBL;Acc:F1RPB0]	gene	overlapping	20.9546	8.651	12.3036
Chr3:31560005-31565380	3	31560005	31565380	0.028261414	ENSSSCG00000007885	ENSSSCG00000007885	No description	gene	overlapping	10.2133	21.2396	-11.0263
Chr3:32530040-32533230	3	32530040	32533230	0.028261414	ENSSSCG00000007899	ENSSSCG00000007899	Uncharacterized protein [Source:UniProtKB/TrEMBL;Acc:F1RL14]	gene	overlapping	21.0228	34.1304	-13.1075
Chr3:42812129-42813942	3	42812129	42813942	0.028261414	ENSSSCG00000008062	ENSSSCG00000008062	No description	gene	overlapping	31.5073	18.3288	13.1785
Chr3:48246673-48260003	3	48246673	48260003	0.028261414	ENSSSCG00000008117	ENSSSCG00000008117	Uncharacterized protein [Source:UniProtKB/TrEMBL;Acc:F1SU62]	gene	overlapping	13.2512	27.8971	-14.6459
Chr3:57115379-57122801	3	57115379	57122801	0.028261414	ENSSSCG00000008177	ENSSSCG00000008177	No description	gene	overlapping	6.30931	17.9181	-11.6088
Chr3:56920589-56928888	3	56920589	56928888	0.028261414	ENSSSCG00000008177	ENSSSCG00000008177	No description	gene	overlapping	20.6911	9.85613	10.835
Chr3:74403659-74406899	3	74403659	74406899	0.02836254	ENSSSCG00000008313	ENSSSCG00000008313	Uncharacterized protein [Source:UniProtKB/TrEMBL;Acc:F1SLE6]	gene	overlapping	8.83226	21.0275	-12.1952
Chr3:130844742-130848073	3	130844742	130848073	0.029472843	ENSSSCG00000008621	ENSSSCG00000008621	No description	gene	overlapping	9.99423	20.6294	-10.6351
Chr8:2889296-2891425	8	2889296	2891425	0.028261414	ENSSSCG00000008712	ENSSSCG00000008712	No description	gene	overlapping	8.17939	15.5395	-7.36012
Chr8:4085041-4086547	8	4085041	4086547	0.028261414	ENSSSCG00000008716	ENSSSCG00000008716	No description	gene	overlapping	10.4563	20.4017	-9.94538
Chr8:70282143-70293991	8	70282143	70293991	0.028261414	ENSSSCG00000008933	ENSSSCG00000008933	No description	gene	overlapping	7.356	19.2522	-11.8962
Chr11:71391290-71398724	11	71391290	71398724	0.028261414	ENSSSCG00000009497	ENSSSCG00000009497	Uncharacterized protein [Source:UniProtKB/TrEMBL;Acc:F1RP54]	gene	overlapping	4.50297	23.7816	-19.2786
Chr11:71298216-71303043	11	71298216	71303043	0.028261414	ENSSSCG00000009497	ENSSSCG00000009497	Uncharacterized protein [Source:UniProtKB/TrEMBL;Acc:F1RP54]	gene	overlapping	9.71877	22.8487	-13.13
Chr11:71384433-71391289	11	71384433	71391289	0.028261414	ENSSSCG00000009497	ENSSSCG00000009497	Uncharacterized protein [Source:UniProtKB/TrEMBL;Acc:F1RP54]	gene	overlapping	9.68477	18.9263	-9.24156
Chr11:71421295-71432242	11	71421295	71432242	0.028261414	ENSSSCG00000009497	ENSSSCG00000009497	Uncharacterized protein [Source:UniProtKB/TrEMBL;Acc:F1RP54]	gene	overlapping	18.9484	11.7829	7.16549
Chr11:76348283-76352656	11	76348283	76352656	0.028261414	ENSSSCG00000009522	ENSSSCG00000009522	No description	gene	overlapping	16.5373	28.097	-11.5596
Chr11:84962770-84964834	11	84962770	84964834	0.028261414	ENSSSCG00000009551	ENSSSCG00000009551	No description	gene	overlapping	21.4551	35.3779	-13.9228
Chr11:84970679-85012900	11	84970679	85012900	0.028261414	ENSSSCG00000009551	ENSSSCG00000009551	No description	gene	overlapping	23.688	13.1389	10.5491
Chr11:86509807-86510894	11	86509807	86510894	0.028261414	ENSSSCG00000009560	ENSSSCG00000009560	Uncharacterized protein [Source:UniProtKB/TrEMBL;Acc:F1RN38]	gene	overlapping	14.7758	28.3367	-13.5609
Chr10:36141053-36148090	10	36141053	36148090	0.043925785	ENSSSCG00000010964	ENSSSCG00000010964	No description	gene	overlapping	8.92918	22.66	-13.7309
Chr10:36106991-36114172	10	36106991	36114172	0.028261414	ENSSSCG00000010964	ENSSSCG00000010964	No description	gene	overlapping	15.2453	5.79035	9.45499
Chr10:37395454-37400943	10	37395454	37400943	0.028261414	ENSSSCG00000010993	ENSSSCG00000010993	Uncharacterized protein [Source:UniProtKB/TrEMBL;Acc:F1SE90]	gene	overlapping	7.42119	19.6783	-12.2571
Chr10:54080375-54088696	10	54080375	54088696	0.028261414	ENSSSCG00000011067	ENSSSCG00000011067	Uncharacterized protein [Source:UniProtKB/TrEMBL;Acc:F1RVK0]	gene	overlapping	12.6108	23.6164	-11.0056
Chr10:76034327-76036193	10	76034327	76036193	0.028261414	ENSSSCG00000011163	ENSSSCG00000011163	No description	gene	overlapping	8.19469	25.0462	-16.8515
Chr13:33782652-33792685	13	33782652	33792685	0.028261414	ENSSSCG00000011340	ENSSSCG00000011340	No description	gene	overlapping	20.0454	8.12904	11.9164
Chr13:33774176-33782634	13	33774176	33782634	0.028261414	ENSSSCG00000011340	ENSSSCG00000011340	No description	gene	overlapping	21.901	9.34312	12.5578
Chr13:33831271-33835796	13	33831271	33835796	0.028261414	ENSSSCG00000011340	ENSSSCG00000011340	No description	gene	overlapping	20.8925	6.42809	14.4644
ChrX:7433921-7436701	X	7433921	7436701	0.028261414	ENSSSCG00000012109	ENSSSCG00000012109	No description	gene	downstream	16.7735	33.6734	-16.8999
ChrX:7426908-7431051	X	7426908	7431051	0.028261414	ENSSSCG00000012109	ENSSSCG00000012109	No description	gene	upstream	17.8925	31.2765	-13.384
ChrX:122249909-122256281	X	122249909	122256281	0.028261414	ENSSSCG00000012654	ENSSSCG00000012654	Uncharacterized protein [Source:UniProtKB/TrEMBL;Acc:F1RTH6]	gene	overlapping	10.0443	22.6145	-12.5702
Chr2:74833008-74837855	2	74833008	74837855	0.028261414	ENSSSCG00000013511	ENSSSCG00000013511	Uncharacterized protein [Source:UniProtKB/TrEMBL;Acc:F1S7K5]	gene	overlapping	5.55888	21.2535	-15.6946
Chr2:72515259-72527769	2	72515259	72527769	0.028261414	ENSSSCG00000013562	ENSSSCG00000013562	Uncharacterized protein [Source:UniProtKB/TrEMBL;Acc:F1SCL2]	gene	overlapping	10.7085	1.58504	9.12348
Chr2:69226358-69230033	2	69226358	69230033	0.028261414	ENSSSCG00000013665	ENSSSCG00000013665	Uncharacterized protein [Source:UniProtKB/TrEMBL;Acc:F1S3H9]	gene	overlapping	16.0115	6.5973	9.41421
Chr2:55339885-55353904	2	55339885	55353904	0.028261414	ENSSSCG00000013973	ENSSSCG00000013973	Uncharacterized protein [Source:UniProtKB/TrEMBL;Acc:F1S5V7]	gene	overlapping	27.4185	13.7482	13.6703
Chr2:90657275-90661334	2	90657275	90661334	0.028261414	ENSSSCG00000014119	ENSSSCG00000014119	Uncharacterized protein [Source:UniProtKB/TrEMBL;Acc:F1RF26]	gene	overlapping	21.3445	8.84327	12.5013
Chr9:4742615-4860262	9	4742615	4860262	0.029376378	ENSSSCG00000014669	ENSSSCG00000014669	Uncharacterized protein [Source:UniProtKB/TrEMBL;Acc:F1RLV8]	gene	overlapping	4.21433	18.5865	-14.3721
Chr9:21897239-21904869	9	21897239	21904869	0.028261414	ENSSSCG00000014909	ENSSSCG00000014909	Uncharacterized protein [Source:UniProtKB/TrEMBL;Acc:F1STT2]	gene	overlapping	22.7946	12.7526	10.042
Chr9:143225616-143232880	9	143225616	143232880	0.028261414	ENSSSCG00000015586	ENSSSCG00000015586	Uncharacterized protein [Source:UniProtKB/TrEMBL;Acc:F1S2Y0]	gene	overlapping	28.3387	9.29441	19.0443
Chr15:111805863-111820030	15	111805863	111820030	0.028261414	ENSSSCG00000016071	ENSSSCG00000016071	No description	gene	overlapping	27.9848	19.2893	8.6955
Chr15:140077575-140088093	15	140077575	140088093	0.028261414	ENSSSCG00000016237	ENSSSCG00000016237	No description	gene	overlapping	14.1256	4.00391	10.1217
Chr18:55615548-55617157	18	55615548	55617157	0.028261414	ENSSSCG00000016740	ENSSSCG00000016740	No description	gene	overlapping	10.9867	29.8983	-18.9116
Chr16:61218086-61227188	16	61218086	61227188	0.028261414	ENSSSCG00000017019	ENSSSCG00000017019	Uncharacterized protein [Source:UniProtKB/TrEMBL;Acc:F1RR75]	gene	overlapping	8.87402	18.407	-9.53299
Chr12:2006745-2007857	12	2006745	2007857	0.028261414	ENSSSCG00000017146	ENSSSCG00000017146	Uncharacterized protein [Source:UniProtKB/TrEMBL;Acc:F1RZA6]	gene	overlapping	22.0919	9.09926	12.9926
Chr12:32704170-32761330	12	32704170	32761330	0.028261414	ENSSSCG00000017608	ENSSSCG00000017608	No description	gene	overlapping	5.00791	14.9262	-9.91825
Chr13:118743979-118750731	13	118743979	118750731	0.028261414	ENSSSCG00000020763	ENSSSCG00000020763	No description	gene	overlapping	17.0909	29.5027	-12.4118
Chr2:78771222-78777002	2	78771222	78777002	0.028261414	ENSSSCG00000020775	ENSSSCG00000020775	No description	gene	overlapping	33.0891	20.2144	12.8747
Chr1:84436252-84453672	1	84436252	84453672	0.028261414	ENSSSCG00000020883	ENSSSCG00000020883	No description	gene	overlapping	26.7395	13.7448	12.9947
Chr12:1816958-1818450	12	1816958	1818450	0.028261414	ENSSSCG00000021150	ENSSSCG00000021150	No description	gene	overlapping	10.7155	34.0712	-23.3556
Chr12:1838014-1839130	12	1838014	1839130	0.028261414	ENSSSCG00000021150	ENSSSCG00000021150	No description	gene	overlapping	36.2982	51.7042	-15.406
Chr10:53339637-53345643	10	53339637	53345643	0.028261414	ENSSSCG00000021311	ENSSSCG00000021311	No description	gene	downstream	25.3844	9.74773	15.6366
Chr3:113744610-113749142	3	113744610	113749142	0.028261414	ENSSSCG00000021320	ENSSSCG00000021320	No description	gene	overlapping	11.4419	22.7337	-11.2918
Chr17:27570996-27586011	17	27570996	27586011	0.028261414	ENSSSCG00000021368	ENSSSCG00000021368	No description	gene	overlapping	12.752	19.1155	-6.36349
Chr11:11719702-11727513	11	11719702	11727513	0.028261414	ENSSSCG00000021381	ENSSSCG00000021381	No description	gene	overlapping	18.3689	4.98276	13.3861
Chr9:24611410-24626151	9	24611410	24626151	0.028261414	ENSSSCG00000021425	ENSSSCG00000021425	No description	gene	overlapping	27.3891	10.2846	17.1045
Chr15:145618651-145627416	15	145618651	145627416	0.028261414	ENSSSCG00000021677	ENSSSCG00000021677	No description	gene	overlapping	9.51688	20.6129	-11.096
Chr9:10314732-10318271	9	10314732	10318271	0.028261414	ENSSSCG00000021702	ENSSSCG00000021702	No description	gene	overlapping	18.51	6.62505	11.8849
Chr6:14246367-14251626	6	14246367	14251626	0.028261414	ENSSSCG00000021806	ENSSSCG00000021806	No description	gene	overlapping	7.28001	17.1373	-9.85729
Chr6:71535907-71539537	6	71535907	71539537	0.028261414	ENSSSCG00000022839	ENSSSCG00000022839	No description	gene	overlapping	1.52113	8.57629	-7.05517
Chr11:22347556-22356508	11	22347556	22356508	0.028261414	ENSSSCG00000022868	ENSSSCG00000022868	No description	gene	overlapping	5.9754	17.7649	-11.7895
Chr6:70577715-70580270	6	70577715	70580270	0.028261414	ENSSSCG00000022946	ENSSSCG00000022946	No description	gene	overlapping	6.78578	17.5891	-10.8034
Chr18:3158816-3160081	18	3158816	3160081	0.039545186	ENSSSCG00000023077	ENSSSCG00000023077	No description	gene	overlapping	25.1378	37.6175	-12.4797
Chr1:75015214-75021107	1	75015214	75021107	0.028261414	ENSSSCG00000023154	ENSSSCG00000023154	No description	gene	overlapping	16.588	9.27033	7.31771
Chr6:42637786-42640501	6	42637786	42640501	0.028261414	ENSSSCG00000023220	ENSSSCG00000023220	No description	gene	overlapping	15.5389	32.3059	-16.767
Chr3:33811814-33815143	3	33811814	33815143	0.028261414	ENSSSCG00000023242	ENSSSCG00000023242	No description	gene	overlapping	15.2827	33.9502	-18.6675
Chr10:18599174-18648325	10	18599174	18648325	0.028261414	ENSSSCG00000023278	ENSSSCG00000023278	No description	gene	overlapping	26.7688	15.5322	11.2365
Chr11:84747656-84748487	11	84747656	84748487	0.028261414	ENSSSCG00000023363	ENSSSCG00000023363	No description	gene	overlapping	23.1253	45.2216	-22.0963
Chr13:67562221-67572416	13	67562221	67572416	0.028261414	ENSSSCG00000023437	ENSSSCG00000023437	Type 1 InsP3 receptor isoform S2 [Source:UniProtKB/TrEMBL;Acc:P79248]	gene	overlapping	16.503	7.12631	9.37666
Chr1:10872527-10882972	1	10872527	10882972	0.028261414	ENSSSCG00000023471	ENSSSCG00000023471	No description	gene	overlapping	15.4909	3.06404	12.4269
Chr3:30057895-30060390	3	30057895	30060390	0.03506296	ENSSSCG00000023626	ENSSSCG00000023626	No description	gene	overlapping	18.5781	8.7367	9.84138
Chr15:122568897-122577411	15	122568897	122577411	0.028261414	ENSSSCG00000023779	ENSSSCG00000023779	No description	gene	overlapping	21.3442	9.8017	11.5425
Chr5:36831527-36838946	5	36831527	36838946	0.028261414	ENSSSCG00000023799	ENSSSCG00000023799	No description	gene	downstream	22.2537	10.8069	11.4467
Chr5:44929219-44941244	5	44929219	44941244	0.031138176	ENSSSCG00000023930	ENSSSCG00000023930	No description	gene	overlapping	4.04392	19.3662	-15.3223
Chr5:45015917-45026601	5	45015917	45026601	0.028261414	ENSSSCG00000023930	ENSSSCG00000023930	No description	gene	downstream	21.1142	8.72873	12.3855
Chr15:145720567-145723678	15	145720567	145723678	0.028261414	ENSSSCG00000023994	ENSSSCG00000023994	No description	gene	overlapping	5.96073	16.7784	-10.8176
Chr15:145682817-145686152	15	145682817	145686152	0.028261414	ENSSSCG00000023994	ENSSSCG00000023994	No description	gene	overlapping	16.405	6.7528	9.65223
Chr9:130618994-130627878	9	130618994	130627878	0.028261414	ENSSSCG00000023997	ENSSSCG00000023997	No description	gene	overlapping	14.5672	29.5361	-14.9689
Chr7:129278077-129279202	7	129278077	129279202	0.028261414	ENSSSCG00000024055	ENSSSCG00000024055	No description	gene	overlapping	28.1935	38.8349	-10.6414
Chr13:41768534-41780263	13	41768534	41780263	0.032592908	ENSSSCG00000024417	ENSSSCG00000024417	No description	gene	overlapping	14.4902	27.7145	-13.2243
Chr7:71409410-71423772	7	71409410	71423772	0.028261414	ENSSSCG00000024473	ENSSSCG00000024473	No description	gene	overlapping	28.5501	16.4679	12.0823
Chr9:139635715-139650274	9	139635715	139650274	0.028261414	ENSSSCG00000024629	ENSSSCG00000024629	No description	gene	upstream	29.1595	10.0427	19.1169
Chr15:150001341-150003270	15	150001341	150003270	0.028261414	ENSSSCG00000024859	ENSSSCG00000024859	No description	gene	overlapping	20.7173	31.5021	-10.7848
Chr5:993490-995312	5	993490	995312	0.028261414	ENSSSCG00000024864	ENSSSCG00000024864	No description	gene	overlapping	17.8126	27.9523	-10.1397
Chr16:34889144-34898459	16	34889144	34898459	0.028261414	ENSSSCG00000024947	ENSSSCG00000024947	No description	gene	overlapping	12.7229	2.48705	10.2358
Chr2:31215773-31228515	2	31215773	31228515	0.03278189	ENSSSCG00000024950	ENSSSCG00000024950	No description	gene	overlapping	25.6844	6.27852	19.4059
Chr3:1620420-1621500	3	1620420	1621500	0.028261414	ENSSSCG00000024952	ENSSSCG00000024952	No description	gene	overlapping	19.7277	59.0243	-39.2966
Chr3:1628481-1629227	3	1628481	1629227	0.028261414	ENSSSCG00000024952	ENSSSCG00000024952	No description	gene	overlapping	19.9269	43.873	-23.9461
Chr3:1793891-1796644	3	1793891	1796644	0.029819535	ENSSSCG00000024952	ENSSSCG00000024952	No description	gene	downstream	15.0988	34.0768	-18.978
Chr16:82337299-82399322	16	82337299	82399322	0.028261414	ENSSSCG00000025115	ENSSSCG00000025115	No description	gene	overlapping	17.1261	26.9317	-9.80555
Chr3:7680829-7687063	3	7680829	7687063	0.028261414	ENSSSCG00000025164	ENSSSCG00000025164	Uncharacterized protein [Source:UniProtKB/TrEMBL;Acc:F1RMY6]	gene	overlapping	12.7823	28.3865	-15.6041
Chr18:3231999-3233603	18	3231999	3233603	0.028261414	ENSSSCG00000025221	ENSSSCG00000025221	No description	gene	overlapping	17.4328	36.0456	-18.6128
Chr15:152340383-152341662	15	152340383	152341662	0.036182135	ENSSSCG00000025228	ENSSSCG00000025228	No description	gene	overlapping	26.0612	39.7399	-13.6787
Chr15:152359829-152361611	15	152359829	152361611	0.028261414	ENSSSCG00000025228	ENSSSCG00000025228	No description	gene	overlapping	28.98	18.1939	10.7862
Chr15:145793911-145796797	15	145793911	145796797	0.028261414	ENSSSCG00000025279	ENSSSCG00000025279	No description	gene	overlapping	15.5667	37.7007	-22.1339
Chr8:19371997-19383465	8	19371997	19383465	0.028261414	ENSSSCG00000025315	ENSSSCG00000025315	No description	gene	overlapping	4.77568	18.7948	-14.0191
Chr3:9729938-9783146	3	9729938	9783146	0.028261414	ENSSSCG00000025430	ENSSSCG00000025430	No description	gene	upstream	10.6256	24.4782	-13.8526
Chr6:101305912-101311959	6	101305912	101311959	0.028261414	ENSSSCG00000025584	ENSSSCG00000025584	No description	gene	overlapping	19.7161	30.0367	-10.3206
Chr6:101152542-101161811	6	101152542	101161811	0.028261414	ENSSSCG00000025584	ENSSSCG00000025584	No description	gene	overlapping	27.1973	15.0017	12.1956
Chr5:103727551-103769643	5	103727551	103769643	0.028261414	ENSSSCG00000025663	ENSSSCG00000025663	No description	gene	overlapping	11.9277	26.0696	-14.142
Chr3:5271052-5272562	3	5271052	5272562	0.028261414	ENSSSCG00000025940	ENSSSCG00000025940	Uncharacterized protein [Source:UniProtKB/TrEMBL;Acc:F1RFM1]	gene	overlapping	20.8271	33.9009	-13.0737
Chr3:5280677-5283948	3	5280677	5283948	0.028261414	ENSSSCG00000025940	ENSSSCG00000025940	Uncharacterized protein [Source:UniProtKB/TrEMBL;Acc:F1RFM1]	gene	overlapping	22.598	11.1199	11.4781
Chr3:5263788-5265363	3	5263788	5265363	0.041794945	ENSSSCG00000025940	ENSSSCG00000025940	Uncharacterized protein [Source:UniProtKB/TrEMBL;Acc:F1RFM1]	gene	overlapping	40.985	21.7465	19.2385
Chr6:4398943-4401073	6	4398943	4401073	0.028261414	ENSSSCG00000025959	ENSSSCG00000025959	No description	gene	overlapping	17.8627	25.8742	-8.0115
Chr8:5536430-5541020	8	5536430	5541020	0.028261414	ENSSSCG00000025991	ENSSSCG00000025991	No description	gene	overlapping	15.4673	4.97962	10.4877
Chr8:5590740-5593006	8	5590740	5593006	0.028261414	ENSSSCG00000025991	ENSSSCG00000025991	No description	gene	overlapping	16.7394	4.80437	11.9351
Chr18:5905608-5908189	18	5905608	5908189	0.0404416	ENSSSCG00000026023	ENSSSCG00000026023	No description	gene	overlapping	2.6481	13.3601	-10.712
Chr18:5837824-5841161	18	5837824	5841161	0.028261414	ENSSSCG00000026023	ENSSSCG00000026023	No description	gene	overlapping	19.4275	7.22399	12.2035
Chr5:3277888-3289069	5	3277888	3289069	0.034172434	ENSSSCG00000026047	ENSSSCG00000026047	No description	gene	overlapping	14.7305	32.2027	-17.4721
Chr13:170267903-170286319	13	170267903	170286319	0.028261414	ENSSSCG00000026236	ENSSSCG00000026236	No description	gene	overlapping	15.4072	5.78943	9.6178
Chr6:32728053-32741040	6	32728053	32741040	0.028261414	ENSSSCG00000026318	ENSSSCG00000026318	No description	gene	overlapping	23.3655	8.27448	15.091
Chr3:15622660-15628359	3	15622660	15628359	0.028261414	ENSSSCG00000026457	ENSSSCG00000026457	No description	gene	overlapping	7.75736	24.6348	-16.8775
Chr1:263624257-263635729	1	263624257	263635729	0.028261414	ENSSSCG00000026487	ENSSSCG00000026487	No description	gene	overlapping	29.3528	16.8773	12.4755
Chr1:263615407-263624230	1	263615407	263624230	0.028261414	ENSSSCG00000026487	ENSSSCG00000026487	No description	gene	overlapping	35.8813	22.7068	13.1745
Chr5:91702668-91706401	5	91702668	91706401	0.028261414	ENSSSCG00000026493	ENSSSCG00000026493	No description	gene	overlapping	8.8855	24.2054	-15.3199
Chr15:24645957-24664402	15	24645957	24664402	0.028261414	ENSSSCG00000026504	ENSSSCG00000026504	No description	gene	overlapping	11.058	2.57201	8.48598
Chr12:52012178-52014562	12	52012178	52014562	0.028261414	ENSSSCG00000026507	ENSSSCG00000026507	No description	gene	overlapping	15.1577	26.8932	-11.7355
Chr13:31310880-31315878	13	31310880	31315878	0.028261414	ENSSSCG00000026521	ENSSSCG00000026521	No description	gene	overlapping	11.4713	29.5629	-18.0916
Chr5:71190543-71202871	5	71190543	71202871	0.028261414	ENSSSCG00000026537	ENSSSCG00000026537	No description	gene	overlapping	10.3281	21.8393	-11.5112
Chr6:5604770-5614160	6	5604770	5614160	0.028261414	ENSSSCG00000026558	ENSSSCG00000026558	No description	gene	overlapping	9.71382	21.7131	-11.9993
Chr12:55797392-55800295	12	55797392	55800295	0.028261414	ENSSSCG00000026629	ENSSSCG00000026629	No description	gene	overlapping	6.96165	20.2118	-13.2501
Chr9:71353623-71357437	9	71353623	71357437	0.028261414	ENSSSCG00000026643	ENSSSCG00000026643	No description	gene	overlapping	15.5049	4.5827	10.9222
Chr18:1554703-1556600	18	1554703	1556600	0.028261414	ENSSSCG00000026652	ENSSSCG00000026652	No description	gene	overlapping	6.30087	28.9729	-22.672
Chr18:1427318-1428181	18	1427318	1428181	0.03388276	ENSSSCG00000026652	ENSSSCG00000026652	No description	gene	overlapping	16.627	30.8802	-14.2532
Chr18:1494474-1496632	18	1494474	1496632	0.028261414	ENSSSCG00000026652	ENSSSCG00000026652	No description	gene	overlapping	14.8773	4.94695	9.93036
Chr15:146686984-146689130	15	146686984	146689130	0.033615246	ENSSSCG00000026703	ENSSSCG00000026703	No description	gene	overlapping	20.1277	32.017	-11.8893
Chr13:80511100-80515043	13	80511100	80515043	0.028261414	ENSSSCG00000026804	ENSSSCG00000026804	No description	gene	overlapping	11.9739	21.7808	-9.80684
Chr2:43604829-43611342	2	43604829	43611342	0.028261414	ENSSSCG00000026892	ENSSSCG00000026892	No description	gene	overlapping	7.12906	15.9561	-8.82706
Chr17:32546166-32549803	17	32546166	32549803	0.028261414	ENSSSCG00000027369	ENSSSCG00000027369	No description	gene	overlapping	15.0431	3.91809	11.125
Chr1:72931406-72958934	1	72931406	72958934	0.028261414	ENSSSCG00000027413	ENSSSCG00000027413	No description	gene	overlapping	19.7068	6.10673	13.6001
Chr1:202500869-202508585	1	202500869	202508585	0.03071856	ENSSSCG00000027537	ENSSSCG00000027537	No description	gene	overlapping	2.90943	15.6935	-12.7841
Chr13:106088860-106093894	13	106088860	106093894	0.028261414	ENSSSCG00000027556	ENSSSCG00000027556	No description	gene	overlapping	14.8962	2.67903	12.2172
Chr18:44487782-44493974	18	44487782	44493974	0.028261414	ENSSSCG00000027704	ENSSSCG00000027704	No description	gene	overlapping	15.8414	4.23999	11.6014
Chr10:18282066-18285155	10	18282066	18285155	0.028261414	ENSSSCG00000028096	ENSSSCG00000028096	No description	gene	overlapping	28.1387	14.3719	13.7667
Chr1:292605864-292617371	1	292605864	292617371	0.028261414	ENSSSCG00000028117	ENSSSCG00000028117	No description	gene	overlapping	20.7634	10.145	10.6184
Chr8:81946449-81951025	8	81946449	81951025	0.028261414	ENSSSCG00000028236	ENSSSCG00000028236	No description	gene	overlapping	8.25957	20.1259	-11.8664
Chr8:81942939-81946448	8	81942939	81946448	0.028261414	ENSSSCG00000028236	ENSSSCG00000028236	No description	gene	overlapping	32.9091	10.9176	21.9915
Chr8:20293632-20299154	8	20293632	20299154	0.028261414	ENSSSCG00000028307	ENSSSCG00000028307	No description	gene	overlapping	5.28221	12.906	-7.6238
Chr3:120499527-120501337	3	120499527	120501337	0.028261414	ENSSSCG00000028366	ENSSSCG00000028366	No description	gene	overlapping	12.9001	26.4908	-13.5906
Chr13:83933133-83938764	13	83933133	83938764	0.028261414	ENSSSCG00000028410	ENSSSCG00000028410	No description	gene	overlapping	19.2407	9.90381	9.33694
Chr2:3520093-3522354	2	3520093	3522354	0.04835945	ENSSSCG00000028501	ENSSSCG00000028501	Aldehyde dehydrogenase [Source:UniProtKB/TrEMBL;Acc:F1RVM9]	gene	overlapping	7.66969	18.6294	-10.9597
Chr17:68853273-68854963	17	68853273	68854963	0.028261414	ENSSSCG00000028573	ENSSSCG00000028573	No description	gene	overlapping	20.9412	7.89492	13.0463
Chr6:120580838-120595520	6	120580838	120595520	0.028261414	ENSSSCG00000028614	ENSSSCG00000028614	No description	gene	overlapping	21.2073	8.22705	12.9803
Chr15:66232142-66237904	15	66232142	66237904	0.038332373	ENSSSCG00000028633	ENSSSCG00000028633	No description	gene	overlapping	13.7036	25.8461	-12.1425
Chr5:85288215-85299064	5	85288215	85299064	0.028261414	ENSSSCG00000028956	ENSSSCG00000028956	No description	gene	overlapping	20.4118	8.84112	11.5707
Chr8:30879983-30882032	8	30879983	30882032	0.028261414	ENSSSCG00000028983	ENSSSCG00000028983	No description	gene	overlapping	9.86152	23.155	-13.2935
Chr7:69252216-69268770	7	69252216	69268770	0.028261414	ENSSSCG00000029349	ENSSSCG00000029349	No description	gene	overlapping	25.1398	10.3696	14.7702
Chr10:65690152-65692986	10	65690152	65692986	0.028261414	ENSSSCG00000029440	ENSSSCG00000029440	No description	gene	upstream	16.8057	26.6676	-9.86186
Chr1:128439617-128507837	1	128439617	128507837	0.028261414	ENSSSCG00000029459	ENSSSCG00000029459	No description	gene	overlapping	26.3898	4.50751	21.8823
Chr11:310418-312385	11	310418	312385	0.037529796	ENSSSCG00000029465	ENSSSCG00000029465	No description	gene	overlapping	28.0872	15.3326	12.7546
Chr13:149006695-149022863	13	149006695	149022863	0.028261414	ENSSSCG00000029517	ENSSSCG00000029517	No description	gene	overlapping	8.79497	24.7498	-15.9548
Chr2:147525210-147527618	2	147525210	147527618	0.028261414	ENSSSCG00000029541	ENSSSCG00000029541	No description	gene	overlapping	13.884	25.6309	-11.7468
Chr9:94232840-94245404	9	94232840	94245404	0.028261414	ENSSSCG00000029648	ENSSSCG00000029648	No description	gene	upstream	11.3028	22.6759	-11.373
Chr1:116995888-117003352	1	116995888	117003352	0.028261414	ENSSSCG00000029836	ENSSSCG00000029836	No description	gene	overlapping	16.4295	5.2736	11.1559
Chr6:32559691-32589767	6	32559691	32589767	0.028261414	ENSSSCG00000029840	ENSSSCG00000029840	No description	gene	upstream	14.2106	34.7616	-20.5511
Chr13:216396666-216399903	13	216396666	216399903	0.028261414	ENSSSCG00000030016	ENSSSCG00000030016	cGMP-dependent 3',5'-cyclic phosphodiesterase 9A [Source:UniProtKB/TrEMBL;Acc:A8DRG6]	gene	overlapping	11.4144	0.785559	10.6288
Chr15:117967372-117981890	15	117967372	117981890	0.028261414	ENSSSCG00000030081	ENSSSCG00000030081	No description	gene	downstream	27.1387	10.9874	16.1514
Chr15:117981891-117992976	15	117981891	117992976	0.028261414	ENSSSCG00000030081	ENSSSCG00000030081	No description	gene	overlapping	34.4966	10.9589	23.5377
Chr11:11924684-11930270	11	11924684	11930270	0.028261414	ENSSSCG00000030111	ENSSSCG00000030111	No description	gene	overlapping	10.9673	21.3035	-10.3362
Chr17:25349268-25365403	17	25349268	25365403	0.035501134	ENSSSCG00000030112	ENSSSCG00000030112	No description	gene	overlapping	30.7528	16.9721	13.7807
Chr1:288414927-288427007	1	288414927	288427007	0.028261414	ENSSSCG00000030322	ENSSSCG00000030322	No description	gene	overlapping	21.594	32.702	-11.108
Chr2:72955924-72993723	2	72955924	72993723	0.028261414	ENSSSCG00000030385	ENSSSCG00000030385	No description	gene	overlapping	9.2096	27.6511	-18.4415
Chr18:14445647-14453185	18	14445647	14453185	0.028261414	ENSSSCG00000030386	ENSSSCG00000030386	No description	gene	overlapping	14.1434	3.84783	10.2956
Chr8:88818256-88827262	8	88818256	88827262	0.034361225	ENSSSCG00000030517	ENSSSCG00000030517	No description	gene	overlapping	12.6107	24.7123	-12.1017
Chr6:145986133-145990524	6	145986133	145990524	0.028261414	ENSSSCG00000030538	ENSSSCG00000030538	No description	gene	overlapping	22.1724	11.3344	10.838
ChrX:117175622-117196962	X	117175622	117196962	0.028261414	ENSSSCG00000030618	ENSSSCG00000030618	No description	gene	upstream	23.2081	10.6384	12.5697
Chr12:18011119-18039565	12	18011119	18039565	0.028261414	ENSSSCG00000030652	ENSSSCG00000030652	No description	gene	overlapping	16.941	2.5216	14.4194
Chr3:100183444-100186907	3	100183444	100186907	0.028261414	EPAS1	ENSSSCG00000008443	endothelial PAS domain-containing protein 1 [Source:RefSeq peptide;Acc:NP_001090889]	gene	overlapping	13.9552	28.6061	-14.651
Chr3:100176002-100179106	3	100176002	100179106	0.028261414	EPAS1	ENSSSCG00000008443	endothelial PAS domain-containing protein 1 [Source:RefSeq peptide;Acc:NP_001090889]	gene	overlapping	8.36831	20.8407	-12.4724
Chr6:74567681-74570180	6	74567681	74570180	0.028261414	EPHA8	ENSSSCG00000003523	EPH receptor A8 [Source:HGNC Symbol;Acc:3391]	gene	overlapping	9.31707	22.0349	-12.7179
Chr6:74745947-74749326	6	74745947	74749326	0.028261414	EPHB2	ENSSSCG00000003527	Uncharacterized protein [Source:UniProtKB/TrEMBL;Acc:F1STZ2]	gene	downstream	8.1361	21.3811	-13.245
Chr14:12435391-12438081	14	12435391	12438081	0.028261414	EPHX2	ENSSSCG00000009666	Epoxide hydrolase 2 [Source:UniProtKB/Swiss-Prot;Acc:Q6Q2C2]	gene	overlapping	17.0935	6.83042	10.2631
Chr2:60873122-60876500	2	60873122	60876500	0.028261414	EPS15L1	ENSSSCG00000013857	Uncharacterized protein [Source:UniProtKB/TrEMBL;Acc:F1S9W6]	gene	overlapping	8.03681	21.5602	-13.5234
Chr15:126078498-126097124	15	126078498	126097124	0.028261414	ERBB4	ENSSSCG00000016160	Uncharacterized protein [Source:UniProtKB/TrEMBL;Acc:F1SSQ9]	gene	overlapping	19.9254	5.27078	14.6546
Chr2:6868588-6870972	2	6868588	6870972	0.028261414	ESRRA	ENSSSCG00000013028	steroid hormone receptor ERR1 [Source:RefSeq peptide;Acc:NP_001163992]	gene	overlapping	7.05636	20.2189	-13.1625
Chr18:831766-834218	18	831766	834218	0.028261414	ESYT2	ENSSSCG00000016406	Uncharacterized protein [Source:UniProtKB/TrEMBL;Acc:F1SHW1]	gene	overlapping	10.7615	31.3203	-20.5588
Chr18:862603-864493	18	862603	864493	0.03077922	ESYT2	ENSSSCG00000016406	Uncharacterized protein [Source:UniProtKB/TrEMBL;Acc:F1SHW1]	gene	upstream	13.2719	33.7511	-20.4792
Chr13:86738668-86750588	13	86738668	86750588	0.028261414	ESYT3	ENSSSCG00000026979	extended synaptotagmin-like protein 3 [Source:HGNC Symbol;Acc:24295]	gene	overlapping	15.3634	25.3906	-10.0272
Chr6:51676043-51679869	6	51676043	51679869	0.028261414	ETFB	ENSSSCG00000003229	Electron transfer flavoprotein subunit beta [Source:UniProtKB/Swiss-Prot;Acc:Q6UAQ8]	gene	overlapping	32.2483	20.848	11.4003
Chr9:91552414-91567559	9	91552414	91567559	0.028261414	ETV1	ENSSSCG00000024591	Uncharacterized protein [Source:UniProtKB/TrEMBL;Acc:F1SF63]	gene	overlapping	13.8943	26.8295	-12.9352
Chr5:63308329-63313711	5	63308329	63313711	0.028261414	ETV6	ENSSSCG00000024152	Uncharacterized protein [Source:UniProtKB/TrEMBL;Acc:F1SQ69]	gene	overlapping	23.7149	8.31028	15.4047
Chr12:5380166-5381075	12	5380166	5381075	0.028261414	EVPL	ENSSSCG00000017192	envoplakin [Source:HGNC Symbol;Acc:3503]	gene	overlapping	40.4166	19.2114	21.2052
Chr8:58315958-58322908	8	58315958	58322908	0.028261414	EXOC1	ENSSSCG00000023269	exocyst complex component 1 [Source:HGNC Symbol;Acc:30380]	gene	overlapping	18.8647	10.8254	8.03924
Chr7:132370-134398	7	132370	134398	0.048113562	EXOC2	ENSSSCG00000000985	exocyst complex component 2 [Source:HGNC Symbol;Acc:24968]	gene	overlapping	13.4968	31.6987	-18.2019
Chr7:124748-126804	7	124748	126804	0.028261414	EXOC2	ENSSSCG00000000985	exocyst complex component 2 [Source:HGNC Symbol;Acc:24968]	gene	overlapping	8.72801	22.5123	-13.7843
Chr7:102482-103777	7	102482	103777	0.028261414	EXOC2	ENSSSCG00000000985	exocyst complex component 2 [Source:HGNC Symbol;Acc:24968]	gene	overlapping	17.8739	31.583	-13.7091
Chr7:62604-63834	7	62604	63834	0.028261414	EXOC2	ENSSSCG00000000985	exocyst complex component 2 [Source:HGNC Symbol;Acc:24968]	gene	overlapping	9.302	22.9425	-13.6405
Chr17:55001731-55005705	17	55001731	55005705	0.038497485	EYA2	ENSSSCG00000007453	Uncharacterized protein [Source:UniProtKB/TrEMBL;Acc:F1SBF5]	gene	overlapping	14.5531	32.1645	-17.6114
Chr11:86198723-86200108	11	86198723	86200108	0.032544233	F10	ENSSSCG00000009558	coagulation factor X protein [Source:RefSeq peptide;Acc:NP_001038057]	gene	overlapping	20.1637	5.38891	14.7748
Chr6:152550103-152552652	6	152550103	152552652	0.028261414	FAAH	ENSSSCG00000003901	Fatty-acid amide hydrolase 1 [Source:UniProtKB/Swiss-Prot;Acc:Q9TUI8]	gene	overlapping	7.97988	16.5358	-8.5559
Chr2:1564175-1567644	2	1564175	1567644	0.028261414	FADD	ENSSSCG00000029328	protein FADD [Source:RefSeq peptide;Acc:NP_001026967]	gene	overlapping	7.68677	25.3715	-17.6847
Chr6:149221706-149234701	6	149221706	149234701	0.028261414	FAF1	ENSSSCG00000003877	Uncharacterized protein [Source:UniProtKB/TrEMBL;Acc:F1S6E6]	gene	overlapping	7.11598	18.6917	-11.5757
Chr2:83028867-83036183	2	83028867	83036183	0.032060534	FAF2	ENSSSCG00000014057	Uncharacterized protein [Source:UniProtKB/TrEMBL;Acc:F1S399]	gene	overlapping	14.9138	31.3265	-16.4128
Chr6:69530938-69534986	6	69530938	69534986	0.028261414	FAM131C	ENSSSCG00000003470	Uncharacterized protein [Source:UniProtKB/TrEMBL;Acc:F1SUT9]	gene	overlapping	1.86382	10.9981	-9.13427
Chr2:85503839-85511423	2	85503839	85511423	0.037038624	FAM169A	ENSSSCG00000014076	Uncharacterized protein [Source:UniProtKB/TrEMBL;Acc:F1S2J5]	gene	overlapping	20.5054	6.44332	14.062
Chr8:144313112-144318893	8	144313112	144318893	0.049024373	FAM175A	ENSSSCG00000009234	Uncharacterized protein [Source:UniProtKB/TrEMBL;Acc:F1RW10]	gene	overlapping	20.0484	4.31965	15.7287
Chr8:12487721-12491719	8	12487721	12491719	0.028261414	FAM184B	ENSSSCG00000026232	Uncharacterized protein [Source:UniProtKB/TrEMBL;Acc:F1S5C6]	gene	overlapping	20.2851	8.38589	11.8992
Chr10:50745343-50755621	10	50745343	50755621	0.03449208	FAM188A	ENSSSCG00000011045	Uncharacterized protein [Source:UniProtKB/TrEMBL;Acc:F1RW87]	gene	overlapping	16.8069	6.25201	10.5549
Chr1:248961178-248969073	1	248961178	248969073	0.028261414	FAM189A2	ENSSSCG00000005249	Uncharacterized protein [Source:UniProtKB/TrEMBL;Acc:F1SJD4]	gene	overlapping	10.8103	23.3748	-12.5644
Chr1:248943590-248951712	1	248943590	248951712	0.028261414	FAM189A2	ENSSSCG00000005249	Uncharacterized protein [Source:UniProtKB/TrEMBL;Acc:F1SJD4]	gene	overlapping	13.0705	23.5271	-10.4566
Chr8:1096379-1098706	8	1096379	1098706	0.032186206	FAM193A	ENSSSCG00000029745	family with sequence similarity 193, member A [Source:HGNC Symbol;Acc:16822]	gene	overlapping	11.6801	28.3943	-16.7142
Chr8:1075074-1075953	8	1075074	1075953	0.03510574	FAM193A	ENSSSCG00000029745	family with sequence similarity 193, member A [Source:HGNC Symbol;Acc:16822]	gene	overlapping	14.1762	29.7919	-15.6156
Chr8:1053010-1054674	8	1053010	1054674	0.028261414	FAM193A	ENSSSCG00000029745	family with sequence similarity 193, member A [Source:HGNC Symbol;Acc:16822]	gene	overlapping	18.0459	28.1689	-10.123
Chr13:217508330-217509331	13	217508330	217509331	0.028261414	FAM207A	ENSSSCG00000028571	family with sequence similarity 207, member A [Source:HGNC Symbol;Acc:15811]	gene	overlapping	23.6633	47.4316	-23.7683
Chr13:42385828-42396961	13	42385828	42396961	0.028261414	FAM208A	ENSSSCG00000024201	family with sequence similarity 208, member A [Source:HGNC Symbol;Acc:30314]	gene	overlapping	29.4596	16.6403	12.8193
Chr14:145507776-145509803	14	145507776	145509803	0.028261414	FAM53B	ENSSSCG00000010732	Uncharacterized protein [Source:UniProtKB/TrEMBL;Acc:F1SDP5]	gene	overlapping	4.86513	17.7708	-12.9056
Chr1:303379009-303380513	1	303379009	303380513	0.028261414	FAM73B	ENSSSCG00000005669	Uncharacterized protein [Source:UniProtKB/TrEMBL;Acc:F1RR47]	gene	overlapping	9.81836	21.7679	-11.9496
Chr1:303380514-303383313	1	303380514	303383313	0.028261414	FAM73B	ENSSSCG00000005669	Uncharacterized protein [Source:UniProtKB/TrEMBL;Acc:F1RR47]	gene	upstream	20.2519	11.5661	8.68576
Chr4:16377967-16385624	4	16377967	16385624	0.028261414	FAM91A1	ENSSSCG00000024424	family with sequence similarity 91, member A1 [Source:HGNC Symbol;Acc:26306]	gene	overlapping	21.4981	8.52651	12.9716
Chr14:146918354-146920425	14	146918354	146920425	0.028261414	FANK1	ENSSSCG00000010745	Uncharacterized protein [Source:UniProtKB/TrEMBL;Acc:F1SDM4]	gene	overlapping	18.2474	27.142	-8.89454
Chr14:146907669-146910073	14	146907669	146910073	0.028261414	FANK1	ENSSSCG00000010745	Uncharacterized protein [Source:UniProtKB/TrEMBL;Acc:F1SDM4]	gene	overlapping	26.6353	10.5839	16.0514
Chr11:74557535-74560648	11	74557535	74560648	0.028261414	FARP1	ENSSSCG00000026863	Uncharacterized protein [Source:UniProtKB/TrEMBL;Acc:F1RP41]	gene	overlapping	15.4377	33.7096	-18.2719
Chr11:74595695-74598897	11	74595695	74598897	0.028261414	FARP1	ENSSSCG00000026863	Uncharacterized protein [Source:UniProtKB/TrEMBL;Acc:F1RP41]	gene	overlapping	20.3549	7.19071	13.1642
Chr7:3478662-3480928	7	3478662	3480928	0.028261414	FARS2	ENSSSCG00000001016	Uncharacterized protein [Source:UniProtKB/TrEMBL;Acc:F1RWX0]	gene	overlapping	16.9195	4.25519	12.6643
Chr3:41398750-41400171	3	41398750	41400171	0.028261414	FBXL16	ENSSSCG00000008006	Uncharacterized protein [Source:UniProtKB/TrEMBL;Acc:F1RG39]	gene	overlapping	5.14852	14.6035	-9.45493
Chr6:2075819-2077860	6	2075819	2077860	0.028261414	FBXO31	ENSSSCG00000002654	F-box protein 31 [Source:HGNC Symbol;Acc:16510]	gene	overlapping	11.295	27.7698	-16.4747
Chr2:156366564-156368049	2	156366564	156368049	0.028261414	FBXO38	ENSSSCG00000014427	Uncharacterized protein [Source:UniProtKB/TrEMBL;Acc:F1RLB1]	gene	overlapping	16.8217	28.8151	-11.9934
Chr2:59546216-59551412	2	59546216	59551412	0.028261414	FCHO1	ENSSSCG00000013885	Uncharacterized protein [Source:UniProtKB/TrEMBL;Acc:F1S938]	gene	overlapping	4.48888	15.9193	-11.4304
Chr2:6972979-6975398	2	6972979	6975398	0.028261414	FERMT3	ENSSSCG00000013041	Uncharacterized protein [Source:UniProtKB/TrEMBL;Acc:F1RQ01]	gene	overlapping	32.0347	13.8055	18.2292
ChrX:129642726-129649174	X	129642726	129649174	0.028261414	FGF13	ENSSSCG00000022331	fibroblast growth factor 13 [Source:HGNC Symbol;Acc:3670]	gene	overlapping	3.85436	11.8696	-8.01521
Chr6:140512635-140524920	6	140512635	140524920	0.028261414	FGGY	ENSSSCG00000003828	Uncharacterized protein [Source:UniProtKB/TrEMBL;Acc:F1S7A8]	gene	overlapping	16.6146	30.5209	-13.9063
Chr3:51642473-51647222	3	51642473	51647222	0.028261414	FHL2	ENSSSCG00000008147	Uncharacterized protein [Source:UniProtKB/TrEMBL;Acc:F1SU18]	gene	downstream	13.3529	3.46205	9.89089
Chr6:112971112-112980130	6	112971112	112980130	0.028261414	FHOD3	ENSSSCG00000027935	formin homology 2 domain containing 3 [Source:HGNC Symbol;Acc:26178]	gene	overlapping	26.2823	11.5668	14.7155
ChrX:12891425-12895959	X	12891425	12895959	0.028261414	FIGF	ENSSSCG00000012135	Uncharacterized protein [Source:UniProtKB/TrEMBL;Acc:F1SQU4]	gene	overlapping	18.7478	6.43257	12.3152
Chr15:116113485-116120585	15	116113485	116120585	0.028261414	FLIP-L	ENSSSCG00000016101	cellular FLICE-like inhibitory protein [Source:RefSeq peptide;Acc:NP_001001628]	gene	overlapping	16.2439	3.71761	12.5263
Chr11:5366855-5370246	11	5366855	5370246	0.028261414	FLT-1	ENSSSCG00000009320	Flt-1 type VEGF receptor; Uncharacterized protein [Source:UniProtKB/TrEMBL;Acc:Q9N0K8]	gene	overlapping	9.79898	25.6913	-15.8923
Chr11:5422958-5425464	11	5422958	5425464	0.035022043	FLT-1	ENSSSCG00000009320	Flt-1 type VEGF receptor; Uncharacterized protein [Source:UniProtKB/TrEMBL;Acc:Q9N0K8]	gene	overlapping	8.29124	21.5275	-13.2362
Chr11:5382526-5383702	11	5382526	5383702	0.028261414	FLT-1	ENSSSCG00000009320	Flt-1 type VEGF receptor; Uncharacterized protein [Source:UniProtKB/TrEMBL;Acc:Q9N0K8]	gene	overlapping	4.29456	17.5167	-13.2221
Chr11:5009438-5013684	11	5009438	5013684	0.028261414	FLT3	ENSSSCG00000009314	Uncharacterized protein [Source:UniProtKB/TrEMBL;Acc:F1RSW2]	gene	overlapping	15.8645	7.33395	8.53057
Chr15:66755188-66764313	15	66755188	66764313	0.028261414	FMNL2	ENSSSCG00000015866	Uncharacterized protein [Source:UniProtKB/TrEMBL;Acc:F1RQH3]	gene	overlapping	18.493	7.79643	10.6966
Chr15:130422436-130430266	15	130422436	130430266	0.028261414	FN1	ENSSSCG00000016174	Uncharacterized protein [Source:UniProtKB/TrEMBL;Acc:F1SS24]	gene	overlapping	8.63713	0.0250231	8.6121
Chr11:18992804-19001392	11	18992804	19001392	0.028261414	FNDC3A	ENSSSCG00000022159	fibronectin type III domain containing 3A [Source:HGNC Symbol;Acc:20296]	gene	overlapping	11.2049	26.5789	-15.3741
Chr13:119782971-119792981	13	119782971	119792981	0.028261414	FNDC3B	ENSSSCG00000011752	Uncharacterized protein [Source:UniProtKB/TrEMBL;Acc:F1SH12]	gene	overlapping	28.3459	13.2214	15.1245
Chr2:139279995-139285566	2	139279995	139285566	0.028261414	FNIP1	ENSSSCG00000014269	Uncharacterized protein [Source:UniProtKB/TrEMBL;Acc:F1RJW1]	gene	overlapping	21.2209	7.18544	14.0355
Chr3:4224451-4226602	3	4224451	4226602	0.032098096	FOXK1	ENSSSCG00000007576	Uncharacterized protein [Source:UniProtKB/TrEMBL;Acc:F1RI50]	gene	overlapping	12.3438	26.1468	-13.803
Chr12:155576-157260	12	155576	157260	0.028261414	FOXK2	ENSSSCG00000017125	Uncharacterized protein [Source:UniProtKB/TrEMBL;Acc:F1S012]	gene	overlapping	12.4418	28.4926	-16.0507
ChrX:64669955-64675144	X	64669955	64675144	0.028261414	FOXO4	ENSSSCG00000012399	Uncharacterized protein [Source:UniProtKB/TrEMBL;Acc:F1RSV5]	gene	overlapping	8.38059	15.5255	-7.1449
Chr5:8922994-8925895	5	8922994	8925895	0.03110106	FOXRED2	ENSSSCG00000000142	FAD-dependent oxidoreductase domain containing 2 [Source:HGNC Symbol;Acc:26264]	gene	overlapping	4.17098	20.5536	-16.3827
Chr1:302218480-302222767	1	302218480	302222767	0.028261414	FPGS	ENSSSCG00000005626	folylpolyglutamate synthase [Source:HGNC Symbol;Acc:3824]	gene	downstream	24.8225	2.90915	21.9133
Chr8:78151702-78156341	8	78151702	78156341	0.028261414	FRAS1	ENSSSCG00000008991	Uncharacterized protein [Source:UniProtKB/TrEMBL;Acc:F1RYS0]	gene	overlapping	23.2252	7.19237	16.0328
Chr11:14223246-14228905	11	14223246	14228905	0.028261414	FREM2	ENSSSCG00000009364	Uncharacterized protein [Source:UniProtKB/TrEMBL;Acc:F1RS31]	gene	upstream	22.7529	11.9267	10.8262
Chr3:97476579-97501560	3	97476579	97501560	0.028261414	FSHR	ENSSSCG00000029084	Follicle-stimulating hormone receptor [Source:UniProtKB/Swiss-Prot;Acc:P49059]	gene	overlapping	16.6091	8.12487	8.48419
Chr15:114729581-114739515	15	114729581	114739515	0.028261414	FTCD	ENSSSCG00000016085	Formimidoyltransferase-cyclodeaminase [Source:UniProtKB/TrEMBL;Acc:F1SI74]	gene	overlapping	10.058	22.9572	-12.8992
Chr1:304607037-304608704	1	304607037	304608704	0.028261414	FUBP3	ENSSSCG00000005702	far upstream element (FUSE) binding protein 3 [Source:RefSeq peptide;Acc:NP_001231214]	gene	overlapping	15.9281	32.5554	-16.6273
Chr16:25569222-25577598	16	25569222	25577598	0.028261414	FYB	ENSSSCG00000016855	Uncharacterized protein [Source:UniProtKB/TrEMBL;Acc:F1SN73]	gene	overlapping	16.9345	8.42046	8.51407
Chr9:13936010-13938287	9	13936010	13938287	0.028261414	GAB2	ENSSSCG00000014891	GRB2-associated binding protein 2 [Source:HGNC Symbol;Acc:14458]	gene	overlapping	16.2793	30.501	-14.2217
Chr1:135061396-135105727	1	135061396	135105727	0.028261414	GABPB1	ENSSSCG00000004645	Uncharacterized protein [Source:UniProtKB/TrEMBL;Acc:F2Z5T9]	gene	overlapping	18.0653	4.96174	13.1036
Chr8:21850-22810	8	21850	22810	0.028261414	GAK	ENSSSCG00000021289	cyclin G associated kinase [Source:HGNC Symbol;Acc:4113]	gene	overlapping	19.3991	29.1365	-9.73741
Chr8:120485269-120494741	8	120485269	120494741	0.028261414	GAR1	ENSSSCG00000020907	Uncharacterized protein [Source:UniProtKB/TrEMBL;Acc:F1S134]	gene	overlapping	17.7163	4.20196	13.5144
Chr12:57519692-57522657	12	57519692	57522657	0.028261414	GAS7	ENSSSCG00000018001	Uncharacterized protein [Source:UniProtKB/TrEMBL;Acc:F1SS71]	gene	overlapping	9.46275	25.6741	-16.2114
Chr12:57542576-57551820	12	57542576	57551820	0.028261414	GAS7	ENSSSCG00000018001	Uncharacterized protein [Source:UniProtKB/TrEMBL;Acc:F1SS71]	gene	downstream	7.07791	18.4292	-11.3513
Chr3:118817448-118822489	3	118817448	118822489	0.028261414	GCKR	ENSSSCG00000028672	glucokinase (hexokinase 4) regulator [Source:HGNC Symbol;Acc:4196]	gene	overlapping	6.1164	20.23	-14.1136
Chr7:123230141-123231913	7	123230141	123231913	0.028261414	GCS	ENSSSCG00000002490	Goosecoid protein; Uncharacterized protein [Source:UniProtKB/TrEMBL;Acc:O77739]	gene	overlapping	7.24198	27.2143	-19.9724
Chr10:71282104-71287608	10	71282104	71287608	0.039523687	GDI2	ENSSSCG00000011137	Rab GDP dissociation inhibitor beta [Source:UniProtKB/Swiss-Prot;Acc:Q6Q7J2]	gene	overlapping	14.6515	2.34933	12.3022
Chr12:37007463-37012429	12	37007463	37012429	0.028261414	GDPD1	ENSSSCG00000030262	glycerophosphodiester phosphodiesterase domain containing 1 [Source:HGNC Symbol;Acc:20883]	gene	overlapping	9.87795	0.552547	9.3254
Chr7:30219105-30227346	7	30219105	30227346	0.028261414	GFRAL	ENSSSCG00000001480	Uncharacterized protein [Source:UniProtKB/TrEMBL;Acc:F1RZW5]	gene	overlapping	22.9828	7.62035	15.3624
Chr16:28823936-28834145	16	28823936	28834145	0.046501074	GHR	ENSSSCG00000016866	Growth hormone receptor Growth hormone-binding protein [Source:UniProtKB/Swiss-Prot;Acc:P19756]	gene	overlapping	28.2647	11.2694	16.9953
Chr6:3539162-3542756	6	3539162	3542756	0.028261414	GINS2	ENSSSCG00000002663	DNA replication complex GINS protein PSF2 [Source:UniProtKB/TrEMBL;Acc:F1S6I3]	gene	overlapping	41.8031	31.7034	10.0997
Chr6:3552903-3554513	6	3552903	3554513	0.028261414	GINS2	ENSSSCG00000002663	DNA replication complex GINS protein PSF2 [Source:UniProtKB/TrEMBL;Acc:F1S6I3]	gene	upstream	39.859	24.2771	15.5819
Chr6:125376732-125386421	6	125376732	125386421	0.028261414	GIPC2	ENSSSCG00000027873	Uncharacterized protein [Source:UniProtKB/TrEMBL;Acc:F1S9S7]	gene	overlapping	22.8699	10.115	12.7549
Chr13:90740321-90754421	13	90740321	90754421	0.028261414	GK5	ENSSSCG00000011677	Uncharacterized protein [Source:UniProtKB/TrEMBL;Acc:F1SKG5]	gene	upstream	14.711	5.08549	9.62546
Chr15:134285498-134287562	15	134285498	134287562	0.028261414	GLB1L	ENSSSCG00000016213	Uncharacterized protein [Source:UniProtKB/TrEMBL;Acc:F1SR82]	gene	overlapping	14.5767	4.71588	9.86077
Chr15:134251691-134255450	15	134251691	134255450	0.028261414	GLB1L	ENSSSCG00000016213	Uncharacterized protein [Source:UniProtKB/TrEMBL;Acc:F1SR82]	gene	overlapping	26.8167	12.7605	14.0562
Chr1:185071855-185084162	1	185071855	185084162	0.034621384	GLCE	ENSSSCG00000026078	Uncharacterized protein [Source:UniProtKB/TrEMBL;Acc:F1SIU0]	gene	overlapping	20.774	10.1467	10.6273
Chr1:133471264-133478778	1	133471264	133478778	0.028261414	GLDN	ENSSSCG00000004632	Uncharacterized protein [Source:UniProtKB/TrEMBL;Acc:F1RYN3]	gene	overlapping	20.6321	9.87975	10.7524
Chr12:57445994-57449891	12	57445994	57449891	0.03717707	GLP2R	ENSSSCG00000017998	Glucagon-like peptide 2 receptor; Uncharacterized protein [Source:UniProtKB/TrEMBL;Acc:F1SS84]	gene	overlapping	13.4843	29.5032	-16.0189
Chr12:57454203-57456595	12	57454203	57456595	0.028261414	GLP2R	ENSSSCG00000017998	Glucagon-like peptide 2 receptor; Uncharacterized protein [Source:UniProtKB/TrEMBL;Acc:F1SS84]	gene	overlapping	7.08538	14.6949	-7.60955
Chr6:48931732-48934681	6	48931732	48934681	0.028261414	GLTSCR1	ENSSSCG00000022302	glioma tumor suppressor candidate region gene 1 [Source:HGNC Symbol;Acc:4332]	gene	overlapping	18.909	29.283	-10.3741
Chr7:1363057-1364857	7	1363057	1364857	0.04053645	GMDS	ENSSSCG00000000994	Uncharacterized protein [Source:UniProtKB/TrEMBL;Acc:F1RX12]	gene	overlapping	8.8406	30.4105	-21.5699
Chr7:1085589-1087393	7	1085589	1087393	0.028261414	GMDS	ENSSSCG00000000994	Uncharacterized protein [Source:UniProtKB/TrEMBL;Acc:F1RX12]	gene	overlapping	20.7725	33.4486	-12.6761
Chr7:1285969-1287378	7	1285969	1287378	0.028261414	GMDS	ENSSSCG00000000994	Uncharacterized protein [Source:UniProtKB/TrEMBL;Acc:F1RX12]	gene	overlapping	4.88673	17.0286	-12.1418
Chr7:12875701-12878594	7	12875701	12878594	0.028261414	GMPR	ENSSSCG00000001064	GMP reductase [Source:UniProtKB/TrEMBL;Acc:F1RUJ4]	gene	overlapping	10.1584	36.6693	-26.5109
Chr2:76087914-76090268	2	76087914	76090268	0.042382427	GNA11	ENSSSCG00000029279	Guanine nucleotide-binding protein subunit alpha-11 [Source:UniProtKB/Swiss-Prot;Acc:Q2XSV9]	gene	overlapping	10.09	26.3672	-16.2772
Chr3:1963890-1965170	3	1963890	1965170	0.029651744	GNA12	ENSSSCG00000023433	Uncharacterized protein [Source:UniProtKB/TrEMBL;Acc:F1RI81]	gene	overlapping	19.681	32.5418	-12.8608
Chr4:121005073-121012680	4	121005073	121012680	0.028261414	GNAI3	ENSSSCG00000006824	guanine nucleotide-binding protein G(k) subunit alpha [Source:RefSeq peptide;Acc:NP_001116589]	gene	overlapping	7.70235	22.5406	-14.8383
Chr10:33191668-33196201	10	33191668	33196201	0.028261414	GOLM1	ENSSSCG00000010955	Uncharacterized protein [Source:UniProtKB/TrEMBL;Acc:F1S4I1]	gene	overlapping	18.3165	6.2203	12.0962
Chr10:9668885-9674940	10	9668885	9674940	0.028907625	GPATCH2	ENSSSCG00000027207	G patch domain containing 2 [Source:HGNC Symbol;Acc:25499]	gene	overlapping	15.4718	5.04611	10.4257
Chr15:55698692-55701090	15	55698692	55701090	0.028261414	GPR124	ENSSSCG00000015825	Uncharacterized protein [Source:UniProtKB/TrEMBL;Acc:F1RX85]	gene	overlapping	6.13883	14.2803	-8.14148
Chr1:25390849-25400537	1	25390849	25400537	0.028261414	GPR126	ENSSSCG00000004139	G protein-coupled receptor 126 [Source:HGNC Symbol;Acc:13841]	gene	overlapping	18.5771	6.67406	11.903
Chr14:59107467-59113239	14	59107467	59113239	0.028261414	GPR137B	ENSSSCG00000010149	G protein-coupled receptor 137B [Source:HGNC Symbol;Acc:11862]	gene	overlapping	11.9401	26.2815	-14.3414
Chr1:72268906-72285050	1	72268906	72285050	0.028261414	GPR63	ENSSSCG00000004341	Uncharacterized protein [Source:UniProtKB/TrEMBL;Acc:F1RY02]	gene	overlapping	14.0202	6.72464	7.29559
Chr8:139325046-139331021	8	139325046	139331021	0.028261414	GPRIN3	ENSSSCG00000009206	Uncharacterized protein [Source:UniProtKB/TrEMBL;Acc:F1RW68]	gene	overlapping	18.6876	7.71504	10.9725
Chr13:155672042-155683591	13	155672042	155683591	0.028261414	GRAMD1C	ENSSSCG00000011915	Uncharacterized protein [Source:UniProtKB/TrEMBL;Acc:F1SP95]	gene	overlapping	8.54057	22.0894	-13.5489
Chr5:5718507-5724856	5	5718507	5724856	0.028261414	GRAP2	ENSSSCG00000000080	Uncharacterized protein [Source:UniProtKB/TrEMBL;Acc:F1SRA1]	gene	overlapping	5.87368	17.2374	-11.3638
Chr9:150346228-150348256	9	150346228	150348256	0.036361616	GRB10	ENSSSCG00000015631	Growth factor receptor-bound protein 10 [Source:UniProtKB/Swiss-Prot;Acc:B5KFD7]	gene	overlapping	5.90087	20.0419	-14.141
Chr4:38335472-38338852	4	38335472	38338852	0.028261414	GRHL2	ENSSSCG00000006060	Uncharacterized protein [Source:UniProtKB/TrEMBL;Acc:F1S0Q6]	gene	overlapping	13.4183	25.9128	-12.4945
Chr8:48181084-48195265	8	48181084	48195265	0.030543687	GRIA2	ENSSSCG00000024685	Ionotropic glutamate receptor AMPA 2 [Source:UniProtKB/TrEMBL;Acc:Q9XT81]	gene	overlapping	26.5569	12.9828	13.5741
ChrX:115587598-115592597	X	115587598	115592597	0.028261414	GRIA3	ENSSSCG00000012638	Uncharacterized protein [Source:UniProtKB/TrEMBL;Acc:F1RU73]	gene	overlapping	1.4087	11.1929	-9.78424
Chr9:39526009-39541595	9	39526009	39541595	0.028261414	GRIA4	ENSSSCG00000030565	glutamate receptor, ionotropic, AMPA 4 [Source:HGNC Symbol;Acc:4574]	gene	overlapping	26.5829	8.14918	18.4337
Chr1:77162115-77181321	1	77162115	77181321	0.036406387	GRIK2	ENSSSCG00000004361	Uncharacterized protein [Source:UniProtKB/TrEMBL;Acc:F1RYR0]	gene	overlapping	18.3685	5.80469	12.5638
Chr9:53258273-53263614	9	53258273	53263614	0.028261414	GRIK4	ENSSSCG00000015131	glutamate receptor, ionotropic, kainate 4 [Source:HGNC Symbol;Acc:4582]	gene	overlapping	30.4815	17.7491	12.7323
Chr6:45907860-45913541	6	45907860	45913541	0.028261414	GRIK5	ENSSSCG00000003039	Uncharacterized protein [Source:UniProtKB/TrEMBL;Acc:F1RGG3]	gene	overlapping	16.8285	7.23133	9.59717
Chr8:1383749-1385828	8	1383749	1385828	0.03413336	GRK4	ENSSSCG00000008694	Uncharacterized protein [Source:UniProtKB/TrEMBL;Acc:F1S8P7]	gene	overlapping	9.93404	22.5241	-12.59
Chr13:149479002-149489532	13	149479002	149489532	0.028261414	GSK3B	ENSSSCG00000011889	glycogen synthase kinase-3 beta [Source:RefSeq peptide;Acc:NP_001121915]	gene	overlapping	29.2436	19.8203	9.4234
Chr15:61873542-61882195	15	61873542	61882195	0.028261414	GTF2E2	ENSSSCG00000015845	Uncharacterized protein [Source:UniProtKB/TrEMBL;Acc:F1RX65]	gene	overlapping	19.1934	4.90781	14.2856
Chr3:11358257-11361057	3	11358257	11361057	0.028261414	GTF2IRD1	ENSSSCG00000007720	Uncharacterized protein [Source:UniProtKB/TrEMBL;Acc:F1RJL4]	gene	overlapping	19.6404	8.99247	10.6479
Chr5:61274647-61281601	5	61274647	61281601	0.028261414	GUCY2C	ENSSSCG00000026724	Heat-stable enterotoxin receptor [Source:UniProtKB/Swiss-Prot;Acc:P55204]	gene	overlapping	12.901	3.2943	9.60666
Chr2:143071094-143075603	2	143071094	143075603	0.03201147	H2AFY	ENSSSCG00000014307	core histone macro-H2A.1 isoform 1 [Source:RefSeq peptide;Acc:NP_001231491]	gene	overlapping	28.6514	17.2733	11.3781
ChrX:141804556-141805954	X	141804556	141805954	0.028261414	HAUS7	ENSSSCG00000012767	HAUS augmin-like complex, subunit 7 [Source:HGNC Symbol;Acc:32979]	gene	overlapping	15.7619	30.4829	-14.721
ChrX:141807516-141808969	X	141807516	141808969	0.04270607	HAUS7	ENSSSCG00000012767	HAUS augmin-like complex, subunit 7 [Source:HGNC Symbol;Acc:32979]	gene	overlapping	14.9387	27.8067	-12.868
ChrX:142244485-142245294	X	142244485	142245294	0.040594805	HCFC1	ENSSSCG00000012793	host cell factor C1 (VP16-accessory protein) [Source:HGNC Symbol;Acc:4839]	gene	overlapping	27.7471	50.5084	-22.7613
ChrX:142255796-142256930	X	142255796	142256930	0.028261414	HCFC1	ENSSSCG00000012793	host cell factor C1 (VP16-accessory protein) [Source:HGNC Symbol;Acc:4839]	gene	overlapping	26.0702	44.1394	-18.0692
Chr13:78557804-78578762	13	78557804	78578762	0.028261414	HDAC11	ENSSSCG00000011608	Uncharacterized protein [Source:UniProtKB/TrEMBL;Acc:F1SPG6]	gene	overlapping	6.00748	19.0692	-13.0617
Chr8:144333606-144339029	8	144333606	144339029	0.028261414	HELQ	ENSSSCG00000009236	Uncharacterized protein [Source:UniProtKB/TrEMBL;Acc:F1RVE2]	gene	overlapping	16.7798	8.90169	7.87812
Chr8:139803066-139807924	8	139803066	139807924	0.028261414	HERC3	ENSSSCG00000009208	Uncharacterized protein [Source:UniProtKB/TrEMBL;Acc:F1RW66]	gene	overlapping	11.7359	23.4606	-11.7247
Chr8:139798847-139802961	8	139798847	139802961	0.028261414	HERC3	ENSSSCG00000009208	Uncharacterized protein [Source:UniProtKB/TrEMBL;Acc:F1RW66]	gene	overlapping	26.6953	13.7586	12.9368
Chr9:145561754-145564497	9	145561754	145564497	0.028857127	HHAT	ENSSSCG00000015607	Uncharacterized protein [Source:UniProtKB/TrEMBL;Acc:F1S2U1]	gene	overlapping	19.1369	37.4414	-18.3044
Chr9:145544465-145548555	9	145544465	145548555	0.043843526	HHAT	ENSSSCG00000015607	Uncharacterized protein [Source:UniProtKB/TrEMBL;Acc:F1S2U1]	gene	overlapping	10.2898	25.6364	-15.3465
Chr18:49646454-49654944	18	49646454	49654944	0.028261414	HIBADH	ENSSSCG00000016695	Uncharacterized protein [Source:UniProtKB/TrEMBL;Acc:F1SHU0]	gene	downstream	26.0142	9.31176	16.7024
Chr3:10259328-10261734	3	10259328	10261734	0.028261414	HIP1	ENSSSCG00000007700	huntingtin interacting protein 1 [Source:HGNC Symbol;Acc:4913]	gene	overlapping	14.9315	28.2737	-13.3422
Chr14:31701746-31705464	14	31701746	31705464	0.028261414	HIP1R	ENSSSCG00000009786	Uncharacterized protein [Source:UniProtKB/TrEMBL;Acc:F1REX8]	gene	overlapping	19.1497	8.7993	10.3504
Chr7:9038112-9042612	7	9038112	9042612	0.028261414	HIVEP1	ENSSSCG00000001049	Uncharacterized protein [Source:UniProtKB/TrEMBL;Acc:F1RV84]	gene	overlapping	11.5741	24.8159	-13.2418
Chr7:9062803-9068854	7	9062803	9068854	0.028261414	HIVEP1	ENSSSCG00000001049	Uncharacterized protein [Source:UniProtKB/TrEMBL;Acc:F1RV84]	gene	overlapping	21.3723	5.95549	15.4168
Chr2:157850065-157855220	2	157850065	157855220	0.028261414	HMGXB3	ENSSSCG00000014440	Uncharacterized protein [Source:UniProtKB/TrEMBL;Acc:F1RL78]	gene	overlapping	15.6606	40.6819	-25.0213
Chr2:71207707-71217323	2	71207707	71217323	0.028261414	HNRNPM	ENSSSCG00000013602	Uncharacterized protein [Source:UniProtKB/TrEMBL;Acc:F1SA50]	gene	overlapping	22.8664	8.11348	14.7529
Chr2:44004306-44013159	2	44004306	44013159	0.028261414	HPS5	ENSSSCG00000013368	Hermansky-Pudlak syndrome 5 protein [Source:RefSeq peptide;Acc:NP_001092073]	gene	overlapping	14.1473	3.23016	10.9171
Chr4:141663400-141666094	4	141663400	141666094	0.03771405	HS2ST1	ENSSSCG00000022032	Uncharacterized protein [Source:UniProtKB/TrEMBL;Acc:F1S4D3]	gene	overlapping	19.5361	37.7069	-18.1709
Chr3:23778035-23781552	3	23778035	23781552	0.034706466	HS3ST2	ENSSSCG00000007837	Uncharacterized protein [Source:UniProtKB/TrEMBL;Acc:F1RPF0]	gene	overlapping	6.25476	17.3996	-11.1448
Chr11:73190793-73194189	11	73190793	73194189	0.028261414	HS6ST3	ENSSSCG00000009504	Uncharacterized protein [Source:UniProtKB/TrEMBL;Acc:F1RP48]	gene	overlapping	21.8332	38.4372	-16.604
Chr6:5072407-5074422	6	5072407	5074422	0.028261414	HSDL1	ENSSSCG00000002681	Uncharacterized protein [Source:UniProtKB/TrEMBL;Acc:F1S5S7]	gene	overlapping	10.566	27.3828	-16.8168
Chr6:5082466-5085047	6	5082466	5085047	0.028261414	HSDL1	ENSSSCG00000002681	Uncharacterized protein [Source:UniProtKB/TrEMBL;Acc:F1S5S7]	gene	overlapping	1.76468	10.0033	-8.23866
Chr13:147409904-147415487	13	147409904	147415487	0.028261414	HSPBAP1	ENSSSCG00000011873	Uncharacterized protein [Source:UniProtKB/TrEMBL;Acc:F1SQ37]	gene	overlapping	16.1993	7.36628	8.83302
Chr8:1584600-1585354	8	1584600	1585354	0.028261414	HTT	ENSSSCG00000008697	huntingtin [Source:RefSeq peptide;Acc:NP_999129]	gene	overlapping	19.8574	35.8303	-15.973
Chr14:113568631-113575136	14	113568631	113575136	0.028261414	IDE	ENSSSCG00000010470	Uncharacterized protein [Source:UniProtKB/TrEMBL;Acc:F1SC98]	gene	overlapping	18.2495	5.66461	12.5849
Chr17:10925710-10934907	17	10925710	10934907	0.028261414	IDO1	ENSSSCG00000007007	Uncharacterized protein [Source:UniProtKB/TrEMBL;Acc:F1SE44]	gene	overlapping	16.5377	2.54605	13.9917
Chr10:43582104-43588504	10	43582104	43588504	0.037527826	IFN-KAPPA	ENSSSCG00000011011	interferon-kappa [Source:RefSeq peptide;Acc:NP_001158329]	gene	overlapping	24.4042	10.8892	13.515
Chr1:225208860-225432437	1	225208860	225432437	0.028261414	IFN-OMEGA-5	ENSSSCG00000028014	interferon omega 7 [Source:RefSeq peptide;Acc:NP_001124005]	gene	overlapping	26.058	17.0947	8.9633
Chr3:41820605-41821968	3	41820605	41821968	0.046104375	IFT140	ENSSSCG00000008020	Uncharacterized protein [Source:UniProtKB/TrEMBL;Acc:F1RG13]	gene	overlapping	12.2516	25.6948	-13.4432
Chr1:153610843-153615300	1	153610843	153615300	0.031063084	IGF1R	ENSSSCG00000004812	insulin-like growth factor 1 receptor [Source:RefSeq peptide;Acc:NP_999337]	gene	overlapping	47.107	27.2455	19.8616
Chr8:59126775-59132307	8	59126775	59132307	0.028261414	IGFBP7	ENSSSCG00000008913	insulin-like growth factor-binding protein 7 [Source:RefSeq peptide;Acc:NP_001157273]	gene	overlapping	3.56589	14.4304	-10.8645
Chr2:43542732-43546269	2	43542732	43546269	0.037343834	IGSF22	ENSSSCG00000013359	Uncharacterized protein [Source:UniProtKB/TrEMBL;Acc:F1SFX4]	gene	overlapping	14.3727	29.7685	-15.3958
Chr17:13092249-13096173	17	13092249	13096173	0.028261414	IKBKB	ENSSSCG00000007030	inhibitor of nuclear factor kappa-B kinase subunit beta [Source:RefSeq peptide;Acc:NP_001093405]	gene	overlapping	15.8268	5.48727	10.3395
Chr17:13084612-13086807	17	13084612	13086807	0.028261414	IKBKB	ENSSSCG00000007030	inhibitor of nuclear factor kappa-B kinase subunit beta [Source:RefSeq peptide;Acc:NP_001093405]	gene	overlapping	19.5483	8.09557	11.4527
Chr7:52461075-52468110	7	52461075	52468110	0.028261414	IL-17	ENSSSCG00000001748	Interleukin-17A [Source:UniProtKB/Swiss-Prot;Acc:Q60I29]	gene	overlapping	4.93055	14.84	-9.90949
Chr3:19710461-19715175	3	19710461	19715175	0.028261414	IL21R	ENSSSCG00000007816	Uncharacterized protein [Source:UniProtKB/TrEMBL;Acc:F1RFG0]	gene	overlapping	3.81938	11.3394	-7.51999
Chr9:100998040-101020989	9	100998040	101020989	0.028261414	IL6	ENSSSCG00000020970	Interleukin-6 [Source:UniProtKB/Swiss-Prot;Acc:P26893]	gene	downstream	21.5351	8.00926	13.5258
Chr3:61463059-61469580	3	61463059	61469580	0.028261414	IMMT	ENSSSCG00000024564	inner membrane protein, mitochondrial [Source:HGNC Symbol;Acc:6047]	gene	overlapping	14.841	27.7351	-12.894
Chr15:51534104-51543698	15	51534104	51543698	0.028261414	ING2	ENSSSCG00000024555	Uncharacterized protein [Source:UniProtKB/TrEMBL;Acc:F1RT11]	gene	overlapping	14.1236	4.95761	9.16601
Chr8:90721656-90730299	8	90721656	90730299	0.03237442	INPP4B	ENSSSCG00000009050	inositol polyphosphate-4-phosphatase, type II, 105kDa [Source:HGNC Symbol;Acc:6075]	gene	overlapping	6.88693	20.127	-13.2401
Chr15:147609069-147615622	15	147609069	147615622	0.03202515	INPP5D	ENSSSCG00000016298	Uncharacterized protein [Source:UniProtKB/TrEMBL;Acc:F1SM44]	gene	overlapping	22.0267	12.1346	9.89211
Chr2:47042945-47060827	2	47042945	47060827	0.029472843	INSC	ENSSSCG00000013385	Uncharacterized protein [Source:UniProtKB/TrEMBL;Acc:F1S991]	gene	overlapping	18.1879	10.318	7.8699
Chr18:2967692-2969311	18	2967692	2969311	0.028261414	INSIG1	ENSSSCG00000016420	insulin induced gene 1 [Source:RefSeq peptide;Acc:NP_001231450]	gene	overlapping	3.75021	19.3737	-15.6235
Chr18:2926998-2929088	18	2926998	2929088	0.034706466	INSIG1	ENSSSCG00000016420	insulin induced gene 1 [Source:RefSeq peptide;Acc:NP_001231450]	gene	overlapping	14.7181	5.42306	9.29505
Chr2:140232156-140251952	2	140232156	140251952	0.028958544	IRF1	ENSSSCG00000014277	Interferon regulatory factor 1 [Source:UniProtKB/Swiss-Prot;Acc:A0FIN4]	gene	overlapping	19.2455	5.88351	13.362
Chr7:80404066-80407049	7	80404066	80407049	0.028261414	IRF9	ENSSSCG00000002002	interferon regulatory factor 9 [Source:RefSeq peptide;Acc:NP_001072138]	gene	overlapping	13.9891	25.119	-11.1299
Chr16:85562236-85563103	16	85562236	85563103	0.028261414	IRX4	ENSSSCG00000017112	Uncharacterized protein [Source:UniProtKB/TrEMBL;Acc:F1S043]	gene	overlapping	2.23489	25.8652	-23.6303
Chr17:24583249-24590501	17	24583249	24590501	0.028261414	ISM1	ENSSSCG00000007073	Uncharacterized protein [Source:UniProtKB/TrEMBL;Acc:F1SBJ6]	gene	overlapping	6.38913	18.9562	-12.5671
Chr1:184047514-184071737	1	184047514	184071737	0.028261414	ITGA11	ENSSSCG00000004961	Uncharacterized protein [Source:UniProtKB/TrEMBL;Acc:F1SJH1]	gene	overlapping	18.9471	8.92585	10.0212
Chr10:50907859-50917587	10	50907859	50917587	0.028261414	ITGA8	ENSSSCG00000011046	Uncharacterized protein [Source:UniProtKB/TrEMBL;Acc:F1RW86]	gene	overlapping	14.0039	26.1364	-12.1325
Chr10:61451801-61458198	10	61451801	61458198	0.028261414	ITGB1	ENSSSCG00000011101	Integrin beta-1 [Source:UniProtKB/Swiss-Prot;Acc:Q9GLP0]	gene	overlapping	14.7904	26.9994	-12.2091
Chr3:135209638-135214886	3	135209638	135214886	0.028261414	ITGB1BP1	ENSSSCG00000029313	integrin beta 1 binding protein 1 [Source:HGNC Symbol;Acc:23927]	gene	overlapping	25.2169	9.17251	16.0444
Chr11:77389931-77394477	11	77389931	77394477	0.028261414	ITGBL1	ENSSSCG00000009526	Uncharacterized protein [Source:UniProtKB/TrEMBL;Acc:F1RP09]	gene	overlapping	38.7697	19.9259	18.8438
Chr7:120972387-120974303	7	120972387	120974303	0.028261414	ITPK1	ENSSSCG00000002457	inositol-tetrakisphosphate 1-kinase [Source:RefSeq peptide;Acc:NP_001137164]	gene	overlapping	4.18849	18.4159	-14.2275
Chr5:50804857-50819688	5	50804857	50819688	0.028261414	ITPR2	ENSSSCG00000000555	Uncharacterized protein [Source:UniProtKB/TrEMBL;Acc:F1SG77]	gene	overlapping	5.4366	20.5512	-15.1146
Chr7:34477160-34478857	7	34477160	34478857	0.028261414	ITPR3	ENSSSCG00000001518	Uncharacterized protein [Source:UniProtKB/TrEMBL;Acc:F1RZR0]	gene	overlapping	8.08154	27.268	-19.1864
Chr6:135900246-135905453	6	135900246	135905453	0.028261414	JAK1	ENSSSCG00000003809	tyrosine-protein kinase JAK1 [Source:RefSeq peptide;Acc:NP_999279]	gene	overlapping	6.83223	17.2974	-10.4651
Chr14:152277714-152279749	14	152277714	152279749	0.028261414	JAKMIP3	ENSSSCG00000024633	Janus kinase and microtubule interacting protein 3 [Source:HGNC Symbol;Acc:23523]	gene	overlapping	7.87301	23.8455	-15.9725
Chr14:152240143-152241905	14	152240143	152241905	0.028261414	JAKMIP3	ENSSSCG00000024633	Janus kinase and microtubule interacting protein 3 [Source:HGNC Symbol;Acc:23523]	gene	overlapping	8.62055	22.0224	-13.4018
Chr14:152252169-152253720	14	152252169	152253720	0.028261414	JAKMIP3	ENSSSCG00000024633	Janus kinase and microtubule interacting protein 3 [Source:HGNC Symbol;Acc:23523]	gene	overlapping	16.4564	4.9421	11.5143
Chr18:49286744-49291599	18	49286744	49291599	0.028261414	JAZF1	ENSSSCG00000016691	Uncharacterized protein [Source:UniProtKB/TrEMBL;Acc:F1SIG0]	gene	overlapping	3.62413	18.1423	-14.5182
Chr6:1836042-1837902	6	1836042	1837902	0.028261414	JPH3	ENSSSCG00000002653	Uncharacterized protein [Source:UniProtKB/TrEMBL;Acc:F1S6K2]	gene	overlapping	4.71904	15.8403	-11.1213
Chr6:1786842-1789614	6	1786842	1789614	0.028261414	JPH3	ENSSSCG00000002653	Uncharacterized protein [Source:UniProtKB/TrEMBL;Acc:F1S6K2]	gene	overlapping	22.497	10.5721	11.9249
ChrX:5416071-5419006	X	5416071	5419006	0.032943893	KAL1	ENSSSCG00000012101	Uncharacterized protein [Source:UniProtKB/TrEMBL;Acc:F1SG25]	gene	overlapping	19.3371	37.1516	-17.8145
ChrX:5484980-5490191	X	5484980	5490191	0.028261414	KAL1	ENSSSCG00000012101	Uncharacterized protein [Source:UniProtKB/TrEMBL;Acc:F1SG25]	gene	overlapping	10.245	21.2248	-10.9797
Chr6:68664901-68667932	6	68664901	68667932	0.028261414	KAZN	ENSSSCG00000003454	Uncharacterized protein [Source:UniProtKB/TrEMBL;Acc:F1SUX8]	gene	overlapping	16.1576	31.852	-15.6944
Chr9:9656397-9662654	9	9656397	9662654	0.028261414	KCNE3	ENSSSCG00000029323	potassium voltage-gated channel subfamily E member 3 [Source:RefSeq peptide;Acc:NP_999258]	gene	overlapping	6.44585	18.3409	-11.895
Chr3:98960284-98965449	3	98960284	98965449	0.028261414	KCNK12	ENSSSCG00000008427	Uncharacterized protein [Source:UniProtKB/TrEMBL;Acc:F1SQH8]	gene	overlapping	1.71776	11.4672	-9.74943
Chr7:118466153-118471894	7	118466153	118471894	0.028261414	KCNK13	ENSSSCG00000002432	potassium channel subfamily K member 13 [Source:RefSeq peptide;Acc:NP_001231525]	gene	overlapping	21.7049	10.3554	11.3495
Chr7:39798778-39803430	7	39798778	39803430	0.028261414	KCNK17	ENSSSCG00000001592	potassium channel, subfamily K, member 17 [Source:HGNC Symbol;Acc:14465]	gene	overlapping	17.266	10.0862	7.1798
Chr9:141134187-141145168	9	141134187	141145168	0.028261414	KCNK2	ENSSSCG00000023451	potassium channel, subfamily K, member 2 [Source:HGNC Symbol;Acc:6277]	gene	overlapping	7.20625	20.3636	-13.1574
Chr2:59359798-59364272	2	59359798	59364272	0.049834684	KCNN1	ENSSSCG00000013892	Uncharacterized protein [Source:UniProtKB/TrEMBL;Acc:F1S923]	gene	overlapping	26.1082	11.1536	14.9545
Chr7:37077370-37083411	7	37077370	37083411	0.028261414	KCTD20	ENSSSCG00000001562	Uncharacterized protein [Source:UniProtKB/TrEMBL;Acc:F1RY94]	gene	overlapping	12.9502	4.10393	8.84627
Chr3:42774716-42776253	3	42774716	42776253	0.039022885	KCTD5	ENSSSCG00000008058	potassium channel tetramerisation domain containing 5 [Source:HGNC Symbol;Acc:21423]	gene	overlapping	19.532	32.1155	-12.5835
Chr4:6225103-6229255	4	6225103	6229255	0.028261414	KHDRBS3	ENSSSCG00000005941	Uncharacterized protein [Source:UniProtKB/TrEMBL;Acc:F1RRV9]	gene	overlapping	8.89255	22.6167	-13.7242
Chr6:71788199-71790603	6	71788199	71790603	0.028261414	KIAA0090	ENSSSCG00000003489	Uncharacterized protein [Source:UniProtKB/TrEMBL;Acc:F1SUQ3]	gene	overlapping	12.8191	30.3142	-17.4951
Chr6:152335513-152339908	6	152335513	152339908	0.028261414	KIAA0494	ENSSSCG00000003895	KIAA0494 [Source:HGNC Symbol;Acc:29051]	gene	overlapping	19.9928	9.62445	10.3684
Chr5:20862462-20873084	5	20862462	20873084	0.028261414	KIAA0748	ENSSSCG00000000299	Uncharacterized protein [Source:UniProtKB/TrEMBL;Acc:F1SR47]	gene	overlapping	20.611	10.1958	10.4152
Chr18:8527951-8536375	18	8527951	8536375	0.028261414	KIAA1147	ENSSSCG00000016491	Uncharacterized protein [Source:UniProtKB/TrEMBL;Acc:F1SRQ4]	gene	overlapping	10.2034	18.7814	-8.57799
Chr7:55369890-55373705	7	55369890	55373705	0.028261414	KIAA1199	ENSSSCG00000001783	KIAA1199 [Source:HGNC Symbol;Acc:29213]	gene	overlapping	1.53169	10.9976	-9.46592
Chr1:242170192-242189089	1	242170192	242189089	0.028261414	KIAA1432	ENSSSCG00000005208	Uncharacterized protein [Source:UniProtKB/TrEMBL;Acc:F1SML9]	gene	overlapping	25.696	10.8623	14.8336
Chr14:138475268-138487760	14	138475268	138487760	0.028261414	KIAA1598	ENSSSCG00000010665	Uncharacterized protein [Source:UniProtKB/TrEMBL;Acc:F1S4S1]	gene	downstream	15.6886	27.5894	-11.9007
Chr14:45831620-45833728	14	45831620	45833728	0.028261414	KIAA1671	ENSSSCG00000009953	Uncharacterized protein [Source:UniProtKB/TrEMBL;Acc:F1RG90]	gene	overlapping	4.62864	18.5778	-13.9492
Chr9:29741252-29749038	9	29741252	29749038	0.028261414	KIAA1731	ENSSSCG00000014946	KIAA1731 [Source:HGNC Symbol;Acc:29366]	gene	overlapping	16.8352	7.40832	9.42684
Chr14:14315253-14323177	14	14315253	14323177	0.028261414	KIF13B	ENSSSCG00000009683	Uncharacterized protein [Source:UniProtKB/TrEMBL;Acc:F1RJP9]	gene	overlapping	27.0243	13.5627	13.4616
Chr14:14294750-14307101	14	14294750	14307101	0.028261414	KIF13B	ENSSSCG00000009683	Uncharacterized protein [Source:UniProtKB/TrEMBL;Acc:F1RJP9]	gene	overlapping	19.9203	5.10812	14.8121
Chr17:28206861-28211504	17	28206861	28211504	0.028261414	KIF16B	ENSSSCG00000007080	Uncharacterized protein [Source:UniProtKB/TrEMBL;Acc:F1SBI9]	gene	overlapping	23.2665	13.8241	9.44233
Chr15:157554302-157555462	15	157554302	157555462	0.028261414	KIF1A	ENSSSCG00000016401	kinesin family member 1A [Source:HGNC Symbol;Acc:888]	gene	overlapping	28.8048	8.8259	19.9789
Chr6:64438108-64446781	6	64438108	64446781	0.028261414	KIF1B	ENSSSCG00000003401	Uncharacterized protein [Source:UniProtKB/TrEMBL;Acc:F1RIF9]	gene	overlapping	18.0407	9.88191	8.15878
Chr6:64591127-64593693	6	64591127	64593693	0.028261414	KIF1B	ENSSSCG00000003401	Uncharacterized protein [Source:UniProtKB/TrEMBL;Acc:F1RIF9]	gene	overlapping	20.9971	12.3379	8.65924
Chr14:110516727-110528394	14	110516727	110528394	0.028261414	KIF20B	ENSSSCG00000010457	Uncharacterized protein [Source:UniProtKB/TrEMBL;Acc:F1SCX7]	gene	overlapping	30.6841	21.865	8.81918
Chr10:27602513-27605298	10	27602513	27605298	0.028261414	KIF22	ENSSSCG00000010912	Uncharacterized protein [Source:UniProtKB/TrEMBL;Acc:F1S5D3]	gene	overlapping	22.2761	9.31456	12.9615
Chr10:36680803-36690164	10	36680803	36690164	0.028261414	KIF24	ENSSSCG00000010984	Uncharacterized protein [Source:UniProtKB/TrEMBL;Acc:F1SEA9]	gene	overlapping	16.7955	26.718	-9.92256
Chr1:2702638-2704304	1	2702638	2704304	0.028261414	KIF25	ENSSSCG00000004016	Uncharacterized protein [Source:UniProtKB/TrEMBL;Acc:F1SBY7]	gene	overlapping	8.30797	22.7479	-14.4399
Chr10:20681651-20685865	10	20681651	20685865	0.028261414	KIF26B	ENSSSCG00000010879	Uncharacterized protein [Source:UniProtKB/TrEMBL;Acc:F1S8L6]	gene	overlapping	6.05194	15.537	-9.48502
Chr10:47241039-47249660	10	47241039	47249660	0.028261414	KIF5B	ENSSSCG00000011027	Uncharacterized protein [Source:UniProtKB/TrEMBL;Acc:F1RWC5]	gene	overlapping	21.7972	10.0057	11.7915
Chr6:1761965-1763636	6	1761965	1763636	0.028261414	KLHDC4	ENSSSCG00000002652	Uncharacterized protein [Source:UniProtKB/TrEMBL;Acc:F1S6K3]	gene	upstream	8.68618	24.5052	-15.819
Chr5:110578388-110579954	5	110578388	110579954	0.028261414	KLHDC7B	ENSSSCG00000000960	kelch domain-containing protein 7B [Source:RefSeq peptide;Acc:NP_001193310]	gene	overlapping	16.2493	4.74621	11.5031
Chr18:10700678-10704413	18	10700678	10704413	0.028261414	KLRG2	ENSSSCG00000016506	Uncharacterized protein [Source:UniProtKB/TrEMBL;Acc:F1SR23]	gene	overlapping	15.4482	5.21298	10.2352
Chr14:153130389-153133793	14	153130389	153133793	0.028261414	KNDC1	ENSSSCG00000010770	Uncharacterized protein [Source:UniProtKB/TrEMBL;Acc:F1SCV4]	gene	overlapping	17.7416	31.464	-13.7223
Chr14:153127843-153129396	14	153127843	153129396	0.029526958	KNDC1	ENSSSCG00000010770	Uncharacterized protein [Source:UniProtKB/TrEMBL;Acc:F1SCV4]	gene	overlapping	19.3074	5.41788	13.8896
Chr6:48772557-48775182	6	48772557	48775182	0.028261414	KPTN	ENSSSCG00000003121	kaptin (actin binding protein) [Source:HGNC Symbol;Acc:6404]	gene	overlapping	6.34783	24.6485	-18.3006
Chr14:37310545-37314858	14	37310545	37314858	0.028261414	KSR2	ENSSSCG00000009855	Uncharacterized protein [Source:UniProtKB/TrEMBL;Acc:F1RKG1]	gene	overlapping	17.227	27.4493	-10.2223
Chr9:118514357-118515538	9	118514357	118515538	0.028261414	LAMB1	ENSSSCG00000015444	laminin, beta 1 [Source:HGNC Symbol;Acc:6486]	gene	overlapping	4.39645	19.2924	-14.8959
Chr1:305081212-305084272	1	305081212	305084272	0.028261414	LAMC3	ENSSSCG00000005710	Uncharacterized protein [Source:UniProtKB/TrEMBL;Acc:F1S0W7]	gene	overlapping	11.3025	25.9853	-14.6828
Chr13:130602696-130609710	13	130602696	130609710	0.028261414	LAMP3	ENSSSCG00000026097	lysosomal-associated membrane protein 3 [Source:HGNC Symbol;Acc:14582]	gene	overlapping	10.1542	20.185	-10.0307
Chr5:110260233-110269304	5	110260233	110269304	0.028261414	LARGE	ENSSSCG00000000959	Uncharacterized protein [Source:UniProtKB/TrEMBL;Acc:F1RYI1]	gene	overlapping	12.2271	24.3057	-12.0786
Chr10:75697446-75699311	10	75697446	75699311	0.03506296	LARP4B	ENSSSCG00000011162	Uncharacterized protein [Source:UniProtKB/TrEMBL;Acc:F1RX46]	gene	overlapping	9.04826	29.4294	-20.3811
Chr3:115476195-115509500	3	115476195	115509500	0.028261414	LCLAT1	ENSSSCG00000025901	lysocardiolipin acyltransferase 1 [Source:RefSeq peptide;Acc:NP_001136317]	gene	overlapping	11.4517	22.1835	-10.7318
Chr1:302601429-302604865	1	302601429	302604865	0.028261414	LCN2	ENSSSCG00000005638	neutrophil gelatinase-associated lipocalin [Source:RefSeq peptide;Acc:NP_001231339]	gene	overlapping	13.7477	25.0785	-11.3308
Chr8:11367237-11373739	8	11367237	11373739	0.028261414	LDB2	ENSSSCG00000029227	LIM domain binding 2 [Source:HGNC Symbol;Acc:6533]	gene	overlapping	12.8179	4.23808	8.57987
Chr7:34638036-34640517	7	34638036	34640517	0.028261414	LEMD2	ENSSSCG00000001520	Uncharacterized protein [Source:UniProtKB/TrEMBL;Acc:F1RZQ8]	gene	upstream	8.32639	20.9933	-12.6669
Chr14:114981751-114991244	14	114981751	114991244	0.028261414	LGI1	ENSSSCG00000010481	Uncharacterized protein [Source:UniProtKB/TrEMBL;Acc:F1SC71]	gene	overlapping	18.7823	10.7235	8.05885
Chr10:28757237-28760271	10	28757237	28760271	0.028261414	LGR6	ENSSSCG00000010923	leucine-rich repeat containing G protein-coupled receptor 6 [Source:HGNC Symbol;Acc:19719]	gene	overlapping	3.77262	13.3501	-9.57752
Chr9:133701221-133704282	9	133701221	133704282	0.028261414	LHX4	ENSSSCG00000015536	LIM homeobox 4 [Source:HGNC Symbol;Acc:21734]	gene	overlapping	11.9547	30.412	-18.4573
Chr1:80462082-80476801	1	80462082	80476801	0.028261414	LIN28B	ENSSSCG00000004365	Lin-28-like protein [Source:UniProtKB/TrEMBL;Acc:F8UV44]	gene	overlapping	20.8437	9.36903	11.4746
Chr8:144632945-144637718	8	144632945	144637718	0.028261414	LIN54	ENSSSCG00000009242	Uncharacterized protein [Source:UniProtKB/TrEMBL;Acc:F1RVD6]	gene	overlapping	16.0799	6.31532	9.76453
Chr1:125541675-125548203	1	125541675	125548203	0.028261414	LIPC	ENSSSCG00000004596	hepatic triacylglycerol lipase [Source:RefSeq peptide;Acc:NP_001137186]	gene	overlapping	35.7336	23.8319	11.9017
Chr9:1254279-1255886	9	1254279	1255886	0.028261414	LMO1	ENSSSCG00000023057	rhombotin-1 [Source:RefSeq peptide;Acc:NP_001106526]	gene	overlapping	19.7726	37.8321	-18.0595
Chr13:168235729-168245600	13	168235729	168245600	0.028261414	LNP1	ENSSSCG00000011964	Uncharacterized protein [Source:UniProtKB/TrEMBL;Acc:F1SKZ7]	gene	overlapping	12.1057	4.98035	7.12533
Chr3:133720310-133721896	3	133720310	133721896	0.028261414	LPIN1	ENSSSCG00000008624	phosphatidate phosphatase LPIN1 [Source:RefSeq peptide;Acc:NP_001124206]	gene	overlapping	10.3185	25.6959	-15.3774
Chr3:133721924-133723872	3	133721924	133723872	0.028261414	LPIN1	ENSSSCG00000008624	phosphatidate phosphatase LPIN1 [Source:RefSeq peptide;Acc:NP_001124206]	gene	overlapping	9.58302	20.7284	-11.1454
Chr3:133734572-133737412	3	133734572	133737412	0.035284005	LPIN1	ENSSSCG00000008624	phosphatidate phosphatase LPIN1 [Source:RefSeq peptide;Acc:NP_001124206]	gene	overlapping	23.1836	10.8645	12.3191
Chr7:40912396-40918357	7	40912396	40918357	0.028261414	LRFN2	ENSSSCG00000001597	Uncharacterized protein [Source:UniProtKB/TrEMBL;Acc:F1RVP3]	gene	overlapping	4.7132	15.8489	-11.1357
Chr18:15986506-15995490	18	15986506	15995490	0.028261414	LRGUK	ENSSSCG00000016542	Uncharacterized protein [Source:UniProtKB/TrEMBL;Acc:F1SNG7]	gene	overlapping	14.682	28.2046	-13.5227
Chr2:3192242-3193423	2	3192242	3193423	0.028261414	LRP5	ENSSSCG00000012885	low density lipoprotein receptor-related protein 5 [Source:HGNC Symbol;Acc:6697]	gene	overlapping	14.5758	26.8579	-12.2822
Chr2:3196956-3199032	2	3196956	3199032	0.028261414	LRP5	ENSSSCG00000012885	low density lipoprotein receptor-related protein 5 [Source:HGNC Symbol;Acc:6697]	gene	overlapping	8.04034	19.8177	-11.7773
Chr5:63583026-63596779	5	63583026	63596779	0.028261414	LRP6	ENSSSCG00000000625	Uncharacterized protein [Source:UniProtKB/TrEMBL;Acc:F1SQ65]	gene	overlapping	8.76903	19.9383	-11.1692
Chr3:102634023-102642651	3	102634023	102642651	0.028261414	LRPPRC	ENSSSCG00000008452	Uncharacterized protein [Source:UniProtKB/TrEMBL;Acc:F1S5J1]	gene	overlapping	21.2679	7.08756	14.1804
Chr4:374699-376357	4	374699	376357	0.028261414	LRRC14	ENSSSCG00000030451	leucine rich repeat containing 14 [Source:HGNC Symbol;Acc:20419]	gene	overlapping	8.99616	20.5372	-11.5411
Chr1:154313543-154322837	1	154313543	154322837	0.04987344	LRRC28	ENSSSCG00000004814	Uncharacterized protein [Source:UniProtKB/TrEMBL;Acc:F1SRX9]	gene	overlapping	19.7846	33.135	-13.3504
Chr1:210144260-210212974	1	210144260	210212974	0.028261414	LRRC48	ENSSSCG00000005081	Uncharacterized protein [Source:UniProtKB/TrEMBL;Acc:F1SSI5]	gene	overlapping	21.9011	6.28463	15.6164
Chr1:303226079-303229000	1	303226079	303229000	0.028261414	LRRC8A	ENSSSCG00000005664	Uncharacterized protein [Source:UniProtKB/TrEMBL;Acc:F1RR61]	gene	overlapping	9.64225	21.5471	-11.9048
Chr6:128755910-128826071	6	128755910	128826071	0.028261414	LRRIQ3	ENSSSCG00000003784	Uncharacterized protein [Source:UniProtKB/TrEMBL;Acc:F1S9P3]	gene	overlapping	19.1875	10.3261	8.86137
Chr9:7445714-7447993	9	7445714	7447993	0.034765895	LRTOMT	ENSSSCG00000014805	leucine rich transmembrane and 0-methyltransferase domain containing [Source:HGNC Symbol;Acc:25033]	gene	overlapping	7.88364	23.2656	-15.382
Chr13:153718707-153729051	13	153718707	153729051	0.028261414	LSAMP	ENSSSCG00000027941	limbic system-associated membrane protein [Source:HGNC Symbol;Acc:6705]	gene	overlapping	6.92208	19.4027	-12.4807
Chr7:27552516-27555117	7	27552516	27555117	0.030899633	LTA	ENSSSCG00000001403	Lymphotoxin-alpha [Source:UniProtKB/Swiss-Prot;Acc:P26445]	gene	overlapping	34.4786	19.4125	15.0661
Chr13:32588806-32593645	13	32588806	32593645	0.028261414	LTF	ENSSSCG00000029879	Lactotransferrin [Source:UniProtKB/Swiss-Prot;Acc:P14632]	gene	overlapping	13.2653	2.70133	10.564
Chr3:40966897-40968966	3	40966897	40968966	0.028261414	LUC7L	ENSSSCG00000007979	Uncharacterized protein [Source:UniProtKB/TrEMBL;Acc:F1RGX3]	gene	overlapping	19.5155	33.2324	-13.7169
Chr1:9199522-9201143	1	9199522	9201143	0.028261414	M6P/IGF2R	ENSSSCG00000004044	cation-independent mannose-6-phosphate receptor [Source:RefSeq peptide;Acc:NP_001231402]	gene	overlapping	12.4497	28.3259	-15.8762
Chr1:9221289-9222910	1	9221289	9222910	0.028261414	M6P/IGF2R	ENSSSCG00000004044	cation-independent mannose-6-phosphate receptor [Source:RefSeq peptide;Acc:NP_001231402]	gene	overlapping	27.0159	16.6345	10.3814
Chr2:7137700-7140479	2	7137700	7140479	0.028261414	MACROD1	ENSSSCG00000013043	MACRO domain-containing protein 1 [Source:RefSeq peptide;Acc:NP_001191699]	gene	overlapping	13.1785	27.0912	-13.9127
Chr4:117029509-117037205	4	117029509	117037205	0.028261414	MAGI3	ENSSSCG00000006767	Uncharacterized protein [Source:UniProtKB/TrEMBL;Acc:F1SBQ7]	gene	overlapping	25.7263	11.5044	14.222
ChrX:70822950-70828376	X	70822950	70828376	0.028261414	MAGT1	ENSSSCG00000012435	Uncharacterized protein [Source:UniProtKB/TrEMBL;Acc:F1RPH6]	gene	overlapping	9.03829	25.6644	-16.6261
Chr4:113211856-113224579	4	113211856	113224579	0.028261414	MAN1A2	ENSSSCG00000006730	Uncharacterized protein [Source:UniProtKB/TrEMBL;Acc:F1SAY6]	gene	overlapping	12.7646	23.8278	-11.0632
Chr2:119146518-119158986	2	119146518	119158986	0.028261414	MAN2A1	ENSSSCG00000014195	Uncharacterized protein [Source:UniProtKB/TrEMBL;Acc:F1RM55]	gene	overlapping	16.723	33.1465	-16.4235
Chr2:66719583-66723359	2	66719583	66723359	0.028261414	MAN2B1	ENSSSCG00000013720	Uncharacterized protein [Source:UniProtKB/TrEMBL;Acc:F1SEY1]	gene	overlapping	12.8039	28.4861	-15.6822
Chr8:3054834-3061561	8	3054834	3061561	0.028261414	MAN2B2	ENSSSCG00000027178	Epididymis-specific alpha-mannosidase [Source:UniProtKB/Swiss-Prot;Acc:Q28949]	gene	overlapping	4.87441	15.3994	-10.525
Chr15:124105970-124116967	15	124105970	124116967	0.028261414	MAP2	ENSSSCG00000016151	Microtubule-associated protein [Source:UniProtKB/TrEMBL;Acc:F1SSS6]	gene	overlapping	4.6637	15.4988	-10.8351
Chr16:38192242-38205944	16	38192242	38205944	0.028261414	MAP3K1	ENSSSCG00000016918	Uncharacterized protein [Source:UniProtKB/TrEMBL;Acc:F1SLK9]	gene	overlapping	24.4981	10.4685	14.0297
ChrX:17049080-17055573	X	17049080	17055573	0.028261414	MAP3K15	ENSSSCG00000020735	mitogen-activated protein kinase kinase kinase 15 [Source:HGNC Symbol;Acc:31689]	gene	overlapping	5.32497	18.3701	-13.0451
Chr14:53606942-53612605	14	53606942	53612605	0.028261414	MAPK1	ENSSSCG00000010081	extracellular signal-regulated kinase-2 [Source:RefSeq peptide;Acc:NP_001185851]	gene	overlapping	17.0009	11.0105	5.99034
Chr14:53590539-53595935	14	53590539	53595935	0.028261414	MAPK1	ENSSSCG00000010081	extracellular signal-regulated kinase-2 [Source:RefSeq peptide;Acc:NP_001185851]	gene	overlapping	19.974	11.5356	8.4383
Chr2:17946040-17947023	2	17946040	17947023	0.028261414	MAPK8IP1	ENSSSCG00000013269	Uncharacterized protein [Source:UniProtKB/TrEMBL;Acc:F1SHK0]	gene	overlapping	18.1433	36.4687	-18.3254
Chr12:17126021-17128704	12	17126021	17128704	0.028261414	MAPT	ENSSSCG00000017311	Microtubule-associated protein [Source:UniProtKB/TrEMBL;Acc:F1RRS8]	gene	overlapping	18.0136	33.3807	-15.3671
Chr2:135324560-135331065	2	135324560	135331065	0.028261414	MARCH3	ENSSSCG00000014249	Uncharacterized protein [Source:UniProtKB/TrEMBL;Acc:F1RKL9]	gene	downstream	6.33927	15.2587	-8.91939
Chr6:152918577-152920118	6	152918577	152920118	0.033425063	MAST2	ENSSSCG00000003913	microtubule associated serine/threonine kinase 2 [Source:HGNC Symbol;Acc:19035]	gene	overlapping	16.0791	30.7804	-14.7014
Chr13:139375929-139402494	13	139375929	139402494	0.028261414	MB21D2	ENSSSCG00000011819	Uncharacterized protein [Source:UniProtKB/TrEMBL;Acc:F1SFH0]	gene	overlapping	29.0336	12.0262	17.0073
Chr11:86232882-86234777	11	86232882	86234777	0.028261414	MCF2L	ENSSSCG00000021158	MCF.2 cell line derived transforming sequence-like [Source:HGNC Symbol;Acc:14576]	gene	overlapping	8.63088	18.5098	-9.87893
Chr13:218464709-218466040	13	218464709	218466040	0.028261414	MCM3AP	ENSSSCG00000026344	minichromosome maintenance complex component 3 associated protein [Source:HGNC Symbol;Acc:6946]	gene	overlapping	14.8841	35.7073	-20.8231
Chr4:87139330-87142594	4	87139330	87142594	0.028261414	MCM4	ENSSSCG00000006273	minichromosome maintenance complex component 4 [Source:HGNC Symbol;Acc:6947]	gene	overlapping	10.0027	21.6718	-11.669
Chr1:48381382-48408298	1	48381382	48408298	0.046394043	MCM9	ENSSSCG00000004246	Uncharacterized protein [Source:UniProtKB/TrEMBL;Acc:F1SF38]	gene	overlapping	12.7795	27.1808	-14.4014
Chr9:22615003-22620372	9	22615003	22620372	0.028261414	ME3	ENSSSCG00000014919	NADP-dependent malic enzyme, mitochondrial [Source:RefSeq peptide;Acc:NP_001231187]	gene	overlapping	11.944	23.9558	-12.0118
Chr12:37669753-37679598	12	37669753	37679598	0.028261414	MED13	ENSSSCG00000017672	Uncharacterized protein [Source:UniProtKB/TrEMBL;Acc:F1S222]	gene	overlapping	13.477	25.2568	-11.7798
ChrX:40457701-40462082	X	40457701	40462082	0.028261414	MED14	ENSSSCG00000012250	Uncharacterized protein [Source:UniProtKB/TrEMBL;Acc:F1RX18]	gene	overlapping	9.14002	25.382	-16.242
Chr1:305735585-305738338	1	305735585	305738338	0.028261414	MED27	ENSSSCG00000005720	Mediator of RNA polymerase II transcription subunit 27 [Source:UniProtKB/Swiss-Prot;Acc:Q6Q7J5]	gene	overlapping	17.3056	39.8428	-22.5372
Chr1:305893247-305895725	1	305893247	305895725	0.028261414	MED27	ENSSSCG00000005720	Mediator of RNA polymerase II transcription subunit 27 [Source:UniProtKB/Swiss-Prot;Acc:Q6Q7J5]	gene	overlapping	25.0261	10.5632	14.4629
Chr4:102218975-102221147	4	102218975	102221147	0.028261414	MEF2D	ENSSSCG00000006482	Myocyte enhancer factor 2D [Source:UniProtKB/TrEMBL;Acc:C6H120]	gene	overlapping	7.73797	23.2248	-15.4868
Chr18:19336071-19340530	18	19336071	19340530	0.028261414	MEST	ENSSSCG00000016554	mesoderm-specific transcript homolog protein [Source:RefSeq peptide;Acc:NP_001121943]	gene	overlapping	25.9081	17.1933	8.71483
Chr13:80084335-80087595	13	80084335	80087595	0.028261414	MGLL	ENSSSCG00000024134	monoglyceride lipase [Source:RefSeq peptide;Acc:NP_001137190]	gene	overlapping	9.25538	19.6128	-10.3575
Chr14:150690853-150692601	14	150690853	150692601	0.028261414	MGMT	ENSSSCG00000010756	Uncharacterized protein [Source:UniProtKB/TrEMBL;Acc:F1SDK3]	gene	overlapping	8.86338	32.8071	-23.9437
Chr14:150734202-150736423	14	150734202	150736423	0.028261414	MGMT	ENSSSCG00000010756	Uncharacterized protein [Source:UniProtKB/TrEMBL;Acc:F1SDK3]	gene	overlapping	12.0018	32.3948	-20.393
Chr14:150869221-150877667	14	150869221	150877667	0.028261414	MGMT	ENSSSCG00000010756	Uncharacterized protein [Source:UniProtKB/TrEMBL;Acc:F1SDK3]	gene	overlapping	17.8133	33.4589	-15.6456
Chr14:150865503-150867186	14	150865503	150867186	0.028261414	MGMT	ENSSSCG00000010756	Uncharacterized protein [Source:UniProtKB/TrEMBL;Acc:F1SDK3]	gene	overlapping	25.5532	38.5045	-12.9513
Chr14:150817900-150822823	14	150817900	150822823	0.03033815	MGMT	ENSSSCG00000010756	Uncharacterized protein [Source:UniProtKB/TrEMBL;Acc:F1SDK3]	gene	overlapping	50.4507	33.0421	17.4086
Chr14:81318305-81326683	14	81318305	81326683	0.028261414	MICU1	ENSSSCG00000010289	calcium uptake protein 1, mitochondrial [Source:RefSeq peptide;Acc:NP_001230534]	gene	overlapping	19.3158	6.23158	13.0842
ChrX:7694897-7698945	X	7694897	7698945	0.03859638	MID1	ENSSSCG00000012110	Uncharacterized protein [Source:UniProtKB/TrEMBL;Acc:F1SG17]	gene	overlapping	10.4381	29.6795	-19.2414
Chr6:72091885-72101496	6	72091885	72101496	0.028261414	MINOS1	ENSSSCG00000028414	mitochondrial inner membrane organizing system 1 [Source:HGNC Symbol;Acc:32068]	gene	overlapping	10.2096	20.7482	-10.5386
Chr11:2118739-2119917	11	2118739	2119917	0.028261414	MIPEP	ENSSSCG00000009290	Uncharacterized protein [Source:UniProtKB/TrEMBL;Acc:F1RTM1]	gene	overlapping	16.8065	39.2639	-22.4574
Chr2:78357669-78359443	2	78357669	78359443	0.028261414	MIR3187	ENSSSCG00000013422	Uncharacterized protein [Source:UniProtKB/TrEMBL;Acc:F1S6R6]	gene	overlapping	59.9453	47.5119	12.4335
Chr18:9858901-9862618	18	9858901	9862618	0.031188395	MKRN1	ENSSSCG00000016498	Uncharacterized protein [Source:UniProtKB/TrEMBL;Acc:F1SRP7]	gene	overlapping	3.34655	15.4509	-12.1043
Chr1:241967439-241977104	1	241967439	241977104	0.028261414	MLANA	ENSSSCG00000005206	Uncharacterized protein [Source:UniProtKB/TrEMBL;Acc:F1SMM1]	gene	overlapping	18.7987	5.39632	13.4024
Chr9:115690539-115704172	9	115690539	115704172	0.028261414	MLL5	ENSSSCG00000029082	myeloid/lymphoid or mixed-lineage leukemia 5 (trithorax homolog, Drosophila) [Source:HGNC Symbol;Acc:18541]	gene	overlapping	22.9714	10.9361	12.0353
Chr10:58735267-58739740	10	58735267	58739740	0.028261414	MLLT10	ENSSSCG00000011085	myeloid/lymphoid or mixed-lineage leukemia (trithorax homolog, Drosophila); translocated to, 10 [Source:HGNC Symbol;Acc:16063]	gene	overlapping	24.8844	11.4127	13.4716
Chr1:226159587-226177900	1	226159587	226177900	0.028261414	MLLT3	ENSSSCG00000005166	Uncharacterized protein [Source:UniProtKB/TrEMBL;Acc:F1SNG3]	gene	overlapping	21.4114	10.3364	11.075
Chr1:2789023-2790680	1	2789023	2790680	0.028261414	MLLT4	ENSSSCG00000004018	Uncharacterized protein [Source:UniProtKB/TrEMBL;Acc:F1SBY5]	gene	overlapping	21.0506	35.5351	-14.4846
Chr1:2779619-2781584	1	2779619	2781584	0.028261414	MLLT4	ENSSSCG00000004018	Uncharacterized protein [Source:UniProtKB/TrEMBL;Acc:F1SBY5]	gene	overlapping	18.6859	32.4583	-13.7724
Chr8:88170370-88181247	8	88170370	88181247	0.028261414	MMAA	ENSSSCG00000009039	Uncharacterized protein [Source:UniProtKB/TrEMBL;Acc:F1RS52]	gene	upstream	8.73414	18.0659	-9.33177
Chr6:58840179-58841563	6	58840179	58841563	0.028261414	MMEL1	ENSSSCG00000003356	Uncharacterized protein [Source:UniProtKB/TrEMBL;Acc:F1RJC1]	gene	overlapping	4.75689	15.0768	-10.3199
Chr13:210039751-210046914	13	210039751	210046914	0.035238646	MORC3	ENSSSCG00000012055	Uncharacterized protein [Source:UniProtKB/TrEMBL;Acc:F1SGX2]	gene	overlapping	16.0496	7.19208	8.85749
Chr5:110751919-110753502	5	110751919	110753502	0.031946663	MOV10L1	ENSSSCG00000000976	Uncharacterized protein [Source:UniProtKB/TrEMBL;Acc:F1RXR7]	gene	overlapping	22.4381	47.2909	-24.8527
Chr5:110769540-110770264	5	110769540	110770264	0.028261414	MOV10L1	ENSSSCG00000000976	Uncharacterized protein [Source:UniProtKB/TrEMBL;Acc:F1RXR7]	gene	overlapping	35.6661	16.903	18.7631
Chr7:97326343-97337077	7	97326343	97337077	0.028261414	MPP5	ENSSSCG00000002287	Uncharacterized protein [Source:UniProtKB/TrEMBL;Acc:F1SA41]	gene	overlapping	10.535	29.6949	-19.1599
Chr3:61254641-61259953	3	61254641	61259953	0.034706466	MRPL35	ENSSSCG00000021746	Uncharacterized protein [Source:UniProtKB/TrEMBL;Acc:F1SVC5]	gene	overlapping	18.6899	5.90733	12.7826
Chr14:14993818-15002403	14	14993818	15002403	0.028261414	MSRA	ENSSSCG00000009684	Uncharacterized protein [Source:UniProtKB/TrEMBL;Acc:F1RJP8]	gene	overlapping	14.2309	3.25818	10.9728
Chr1:224105897-224122839	1	224105897	224122839	0.028261414	MTAP	ENSSSCG00000005135	Uncharacterized protein [Source:UniProtKB/TrEMBL;Acc:F1SNK3]	gene	overlapping	21.6849	10.8784	10.8066
Chr1:17560771-17566085	1	17560771	17566085	0.028261414	MTHFD1L	ENSSSCG00000004092	Uncharacterized protein [Source:UniProtKB/TrEMBL;Acc:F1S7V9]	gene	overlapping	13.0751	6.30803	6.76711
Chr6:2776813-2778218	6	2776813	2778218	0.028261414	MTHFSD	ENSSSCG00000002660	Uncharacterized protein [Source:UniProtKB/TrEMBL;Acc:F1S6I6]	gene	overlapping	20.4524	31.3724	-10.92
Chr3:90750764-90761802	3	90750764	90761802	0.028261414	MTIF2	ENSSSCG00000008404	Translation initiation factor IF-2 [Source:UniProtKB/TrEMBL;Acc:F1SQK6]	gene	overlapping	19.3725	9.39857	9.9739
ChrX:139939469-139941826	X	139939469	139941826	0.028261414	MTM1	ENSSSCG00000012742	Uncharacterized protein [Source:UniProtKB/TrEMBL;Acc:F1RQ28]	gene	overlapping	26.091	44.3356	-18.2446
Chr5:74683956-74695699	5	74683956	74695699	0.028261414	MUC19	ENSSSCG00000000785	Uncharacterized protein [Source:UniProtKB/TrEMBL;Acc:F1SHN6]	gene	overlapping	18.1253	7.1487	10.9766
Chr5:86537123-86545095	5	86537123	86545095	0.028261414	MYBPC1	ENSSSCG00000000866	Uncharacterized protein [Source:UniProtKB/TrEMBL;Acc:F1SRI8]	gene	overlapping	17.6391	8.15528	9.48381
Chr17:43563099-43567363	17	43563099	43567363	0.028261414	MYH7B	ENSSSCG00000007288	myosin, heavy chain 7B, cardiac muscle, beta [Source:HGNC Symbol;Acc:15906]	gene	overlapping	30.969	19.0635	11.9055
Chr3:8727650-8746286	3	8727650	8746286	0.028261414	MYL10	ENSSSCG00000007680	Uncharacterized protein [Source:UniProtKB/TrEMBL;Acc:F1RKG0]	gene	overlapping	4.06403	14.8614	-10.7973
Chr16:6382362-6383871	16	6382362	6383871	0.028261414	MYO10	ENSSSCG00000016794	Uncharacterized protein [Source:UniProtKB/TrEMBL;Acc:F1SRM1]	gene	overlapping	12.5953	29.3135	-16.7182
Chr12:47209903-47213048	12	47209903	47213048	0.028261414	MYO18A	ENSSSCG00000017783	Uncharacterized protein [Source:UniProtKB/TrEMBL;Acc:F1RN91]	gene	overlapping	8.32739	20.2316	-11.9042
Chr14:46511792-46514703	14	46511792	46514703	0.028261414	MYO18B	ENSSSCG00000009957	Uncharacterized protein [Source:UniProtKB/TrEMBL;Acc:F1RG85]	gene	overlapping	12.5276	29.0038	-16.4762
Chr1:132347174-132357384	1	132347174	132357384	0.037329398	MYO5A	ENSSSCG00000004620	Myosin Va [Source:UniProtKB/TrEMBL;Acc:Q4LE86]	gene	overlapping	35.4806	14.6292	20.8513
Chr3:141678457-141679564	3	141678457	141679564	0.028261414	MYT1L	ENSSSCG00000029334	Uncharacterized protein [Source:UniProtKB/TrEMBL;Acc:F1S9J8]	gene	overlapping	7.98015	25.2106	-17.2304
Chr8:32912367-32921895	8	32912367	32921895	0.028261414	N4BP2	ENSSSCG00000008792	Uncharacterized protein [Source:UniProtKB/TrEMBL;Acc:F1S4H4]	gene	overlapping	12.978	23.5497	-10.5718
Chr11:26298143-26303254	11	26298143	26303254	0.028261414	NAA16	ENSSSCG00000009435	Uncharacterized protein [Source:UniProtKB/TrEMBL;Acc:F1RJ88]	gene	overlapping	26.4098	17.3033	9.10654
Chr5:3766413-3771003	5	3766413	3771003	0.028261414	NAGA	ENSSSCG00000000042	alpha-N-acetylgalactosaminidase [Source:RefSeq peptide;Acc:NP_001116694]	gene	overlapping	41.484	26.7096	14.7744
Chr2:446441-447380	2	446441	447380	0.031135887	NAP1L4	ENSSSCG00000012856	Uncharacterized protein [Source:UniProtKB/TrEMBL;Acc:F1RYA4]	gene	overlapping	21.5201	46.1405	-24.6204
Chr17:34473462-34479764	17	34473462	34479764	0.028261414	NAPB	ENSSSCG00000007118	Uncharacterized protein [Source:UniProtKB/TrEMBL;Acc:F1SAT6]	gene	overlapping	19.5539	4.3151	15.2388
Chr12:94527-96003	12	94527	96003	0.038655773	NARF	ENSSSCG00000017126	Uncharacterized protein [Source:UniProtKB/TrEMBL;Acc:F1S011]	gene	overlapping	13.3899	30.8865	-17.4965
Chr12:102908-104047	12	102908	104047	0.028261414	NARF	ENSSSCG00000017126	Uncharacterized protein [Source:UniProtKB/TrEMBL;Acc:F1S011]	gene	overlapping	12.0443	24.9588	-12.9145
Chr3:41431077-41432372	3	41431077	41432372	0.028261414	NARFL	ENSSSCG00000008002	Uncharacterized protein [Source:UniProtKB/TrEMBL;Acc:F1RG50]	gene	overlapping	17.7003	35.5268	-17.8266
Chr3:41428313-41429897	3	41428313	41429897	0.028261414	NARFL	ENSSSCG00000008002	Uncharacterized protein [Source:UniProtKB/TrEMBL;Acc:F1RG50]	gene	overlapping	22.2965	39.0776	-16.7811
Chr4:38196956-38202181	4	38196956	38202181	0.028261414	NCALD	ENSSSCG00000006059	neurocalcin delta [Source:RefSeq peptide;Acc:NP_001231394]	gene	overlapping	10.436	23.017	-12.581
Chr4:38209359-38214762	4	38209359	38214762	0.028261414	NCALD	ENSSSCG00000006059	neurocalcin delta [Source:RefSeq peptide;Acc:NP_001231394]	gene	overlapping	11.3516	22.7254	-11.3739
Chr13:195431005-195450525	13	195431005	195450525	0.028261414	NCAM2	ENSSSCG00000012020	Uncharacterized protein [Source:UniProtKB/TrEMBL;Acc:F1SHP7]	gene	overlapping	13.711	1.94872	11.7623
Chr2:75903988-75908153	2	75903988	75908153	0.032892518	NCLN	ENSSSCG00000013475	Uncharacterized protein [Source:UniProtKB/TrEMBL;Acc:F1S8E9]	gene	overlapping	26.2925	10.2485	16.0439
Chr7:27535294-27539791	7	27535294	27539791	0.028261414	NCR3	ENSSSCG00000001407	Uncharacterized protein [Source:UniProtKB/TrEMBL;Acc:F1RTF1]	gene	overlapping	20.9451	7.0759	13.8692
Chr1:314157207-314158346	1	314157207	314158346	0.028261414	NDOR1	ENSSSCG00000005859	Uncharacterized protein [Source:UniProtKB/TrEMBL;Acc:F1RVV9]	gene	overlapping	28.6427	42.3964	-13.7537
Chr16:34964955-34986695	16	34964955	34986695	0.028261414	NDUFS4	ENSSSCG00000016893	NADH dehydrogenase (ubiquinone) Fe-S protein 4, 18kDa (NADH-coenzyme Q reductase) [Source:HGNC Symbol;Acc:7711]	gene	overlapping	11.4679	21.7225	-10.2546
Chr10:59675392-59680665	10	59675392	59680665	0.028261414	NEBL	ENSSSCG00000011090	Uncharacterized protein [Source:UniProtKB/TrEMBL;Acc:F1RVG6]	gene	overlapping	5.12083	15.5993	-10.4785
Chr1:298905870-298908619	1	298905870	298908619	0.028261414	NEK6	ENSSSCG00000005587	Serine/threonine-protein kinase Nek6 [Source:UniProtKB/Swiss-Prot;Acc:A2BD05]	gene	overlapping	18.7245	28.9126	-10.1882
Chr1:298846542-298849440	1	298846542	298849440	0.028261414	NEK6	ENSSSCG00000005587	Serine/threonine-protein kinase Nek6 [Source:UniProtKB/Swiss-Prot;Acc:A2BD05]	gene	downstream	10.622	3.98504	6.637
Chr15:147511127-147513126	15	147511127	147513126	0.03503852	NEU2	ENSSSCG00000016297	Uncharacterized protein [Source:UniProtKB/TrEMBL;Acc:F1SM45]	gene	overlapping	3.7834	21.9383	-18.1549
Chr9:10407994-10414289	9	10407994	10414289	0.028261414	NEU3	ENSSSCG00000021638	Uncharacterized protein [Source:UniProtKB/TrEMBL;Acc:F1SUP3]	gene	overlapping	14.8695	5.7126	9.15692
Chr3:139951902-139952994	3	139951902	139952994	0.03169779	NEURL4	ENSSSCG00000017941	Uncharacterized protein [Source:UniProtKB/TrEMBL;Acc:F1SFT8]	gene	overlapping	17.1126	36.404	-19.2914
Chr6:125582681-125592451	6	125582681	125592451	0.028261414	NEXN	ENSSSCG00000003768	Uncharacterized protein [Source:UniProtKB/TrEMBL;Acc:F1S9S8]	gene	overlapping	27.944	14.7947	13.1494
Chr17:59228210-59230630	17	59228210	59230630	0.028261414	NFATC2	ENSSSCG00000007477	nuclear factor of activated T-cells, cytoplasmic 2 [Source:RefSeq peptide;Acc:NP_001106923]	gene	overlapping	13.108	23.5918	-10.4838
Chr1:232016941-232027056	1	232016941	232027056	0.028261414	NFIB	ENSSSCG00000005190	Nuclear factor 1 [Source:UniProtKB/TrEMBL;Acc:F1SMQ7]	gene	overlapping	25.8341	9.67042	16.1636
Chr13:166738433-166747070	13	166738433	166747070	0.028261414	NFKBIZ	ENSSSCG00000011951	Uncharacterized protein [Source:UniProtKB/TrEMBL;Acc:F1SL19]	gene	overlapping	12.2684	3.4669	8.8015
ChrX:15295965-15297215	X	15295965	15297215	0.028261414	NHS	ENSSSCG00000012151	Uncharacterized protein [Source:UniProtKB/TrEMBL;Acc:F1SQQ8]	gene	overlapping	4.74856	32.0925	-27.3439
ChrX:15280927-15284773	X	15280927	15284773	0.043384105	NHS	ENSSSCG00000012151	Uncharacterized protein [Source:UniProtKB/TrEMBL;Acc:F1SQQ8]	gene	overlapping	19.5443	33.483	-13.9387
Chr17:35236504-35239793	17	35236504	35239793	0.028261414	NINL	ENSSSCG00000007135	Uncharacterized protein [Source:UniProtKB/TrEMBL;Acc:F1SAS0]	gene	overlapping	12.072	29.2072	-17.1352
Chr6:55363022-55368797	6	55363022	55368797	0.028261414	NLRP4	ENSSSCG00000003312	NLR family, pyrin domain containing 4 [Source:HGNC Symbol;Acc:22943]	gene	overlapping	20.2765	36.1202	-15.8437
Chr6:55374854-55378273	6	55374854	55378273	0.028261414	NLRP4	ENSSSCG00000003312	NLR family, pyrin domain containing 4 [Source:HGNC Symbol;Acc:22943]	gene	overlapping	16.6767	25.3154	-8.63864
Chr6:55504294-55507007	6	55504294	55507007	0.028261414	NLRP8	ENSSSCG00000003315	NLR family, pyrin domain containing 8 [Source:HGNC Symbol;Acc:22940]	gene	overlapping	7.81918	21.3322	-13.513
Chr9:51431600-51434614	9	51431600	51434614	0.028261414	NLRX1	ENSSSCG00000015114	NLR family member X1 [Source:RefSeq peptide;Acc:NP_001191698]	gene	overlapping	7.24252	27.7978	-20.5553
Chr10:51429116-51433491	10	51429116	51433491	0.028261414	NMT2	ENSSSCG00000026499	N-myristoyltransferase 2 [Source:HGNC Symbol;Acc:7858]	gene	overlapping	21.4745	10.9761	10.4984
Chr9:46629331-46634134	9	46629331	46634134	0.028261414	NNMT	ENSSSCG00000015054	Nicotinamide N-methyltransferase [Source:UniProtKB/Swiss-Prot;Acc:Q06AV1]	gene	overlapping	0.516484	10.6731	-10.1566
Chr6:109972660-109984532	6	109972660	109984532	0.028261414	NOL4	ENSSSCG00000003737	Uncharacterized protein [Source:UniProtKB/TrEMBL;Acc:F1SAK1]	gene	overlapping	21.8804	11.9261	9.95428
Chr15:84427946-84434821	15	84427946	84434821	0.028261414	NOSTRIN	ENSSSCG00000015923	Uncharacterized protein [Source:UniProtKB/TrEMBL;Acc:F1S1W6]	gene	overlapping	19.7962	1.61457	18.1816
Chr7:28052969-28053649	7	28052969	28053649	0.028261414	NOTCH4	ENSSSCG00000001440	neurogenic locus notch homolog protein 4 [Source:RefSeq peptide;Acc:NP_001116619]	gene	overlapping	1.16016	10.6402	-9.48001
Chr6:48246033-48248334	6	48246033	48248334	0.028261414	NPAS1	ENSSSCG00000003108	Uncharacterized protein [Source:UniProtKB/TrEMBL;Acc:F1RM06]	gene	overlapping	19.0131	33.7638	-14.7507
Chr12:1125221-1126607	12	1125221	1126607	0.028261414	NPLOC4	ENSSSCG00000024235	nuclear protein localization 4 homolog (S. cerevisiae) [Source:HGNC Symbol;Acc:18261]	gene	overlapping	13.0031	35.9957	-22.9926
Chr12:1102289-1103075	12	1102289	1103075	0.028261414	NPLOC4	ENSSSCG00000024235	nuclear protein localization 4 homolog (S. cerevisiae) [Source:HGNC Symbol;Acc:18261]	gene	overlapping	24.5418	39.084	-14.5421
Chr12:1118096-1119208	12	1118096	1119208	0.028261414	NPLOC4	ENSSSCG00000024235	nuclear protein localization 4 homolog (S. cerevisiae) [Source:HGNC Symbol;Acc:18261]	gene	overlapping	13.8042	28.1659	-14.3617
Chr3:40921771-40923471	3	40921771	40923471	0.028510427	NPRL3	ENSSSCG00000007981	nitrogen permease regulator-like 3 (S. cerevisiae) [Source:HGNC Symbol;Acc:14124]	gene	overlapping	69.0703	49.337	19.7333
Chr13:76896778-76910751	13	76896778	76910751	0.028261414	NR2C2	ENSSSCG00000011594	Uncharacterized protein [Source:UniProtKB/TrEMBL;Acc:F1SPJ9]	gene	overlapping	15.4552	6.43603	9.01915
Chr1:299130555-299132982	1	299130555	299132982	0.028261414	NR5A1	ENSSSCG00000005588	Steroidogenic factor 1 [Source:UniProtKB/Swiss-Prot;Acc:P79387]	gene	overlapping	33.0746	16.3409	16.7337
Chr10:27409248-27413012	10	27409248	27413012	0.028261414	NR5A2	ENSSSCG00000024975	Uncharacterized protein [Source:UniProtKB/TrEMBL;Acc:F1S5D5]	gene	overlapping	13.4519	1.22371	12.2282
Chr9:540570-541589	9	540570	541589	0.028261414	NRIP3	ENSSSCG00000014570	nuclear receptor interacting protein 3 [Source:HGNC Symbol;Acc:1167]	gene	overlapping	12.6805	28.4053	-15.7248
Chr4:81055657-81059732	4	81055657	81059732	0.043924555	NSMAF	ENSSSCG00000006236	Uncharacterized protein [Source:UniProtKB/TrEMBL;Acc:F1RT84]	gene	overlapping	25.6973	12.6853	13.0121
Chr8:33527690-33536434	8	33527690	33536434	0.028261414	NSUN7	ENSSSCG00000024496	NOP2/Sun domain family, member 7 [Source:HGNC Symbol;Acc:25857]	gene	overlapping	9.22616	19.0148	-9.78859
Chr5:84173764-84191688	5	84173764	84191688	0.028261414	NT5DC3	ENSSSCG00000000853	Uncharacterized protein [Source:UniProtKB/TrEMBL;Acc:F1SRK2]	gene	overlapping	24.6953	6.58121	18.114
Chr1:212937618-212943659	1	212937618	212943659	0.047052026	NTRK3	ENSSSCG00000005106	NT-3 growth factor receptor [Source:UniProtKB/Swiss-Prot;Acc:P24786]	gene	overlapping	11.8329	28.8496	-17.0167
Chr5:14233168-14236677	5	14233168	14236677	0.028261414	NUAK1	ENSSSCG00000027055	Uncharacterized protein [Source:UniProtKB/TrEMBL;Acc:F1SPP7]	gene	overlapping	6.0234	20.8187	-14.7953
Chr9:72222407-72225107	9	72222407	72225107	0.028261414	NUAK2	ENSSSCG00000027243	NUAK family, SNF1-like kinase, 2 [Source:HGNC Symbol;Acc:29558]	gene	overlapping	1.44824	11.5667	-10.1185
Chr18:55683537-55684752	18	55683537	55684752	0.028261414	NUDCD3	ENSSSCG00000016747	Uncharacterized protein [Source:UniProtKB/TrEMBL;Acc:F1SSH4]	gene	overlapping	16.8256	28.5491	-11.7235
Chr10:65569800-65571871	10	65569800	65571871	0.028261414	NUDT5	ENSSSCG00000011113	Uncharacterized protein [Source:UniProtKB/TrEMBL;Acc:F1RUP7]	gene	overlapping	11.0693	24.7851	-13.7159
Chr9:660984-662835	9	660984	662835	0.028261414	null				Not found	22.7563	55.1717	-32.4154
ChrX:15562898-15569440	X	15562898	15569440	0.028261414	null				Not found	8.1472	36.4793	-28.3321
Chr17:66617341-66619380	17	66617341	66619380	0.028261414	null				Not found	6.57148	33.9322	-27.3607
Chr15:153058238-153059342	15	153058238	153059342	0.028261414	null				Not found	7.08501	34.2345	-27.1495
Chr2:155503867-155506194	2	155503867	155506194	0.03218438	null				Not found	17.253	43.9749	-26.7219
Chr1:307690852-307691860	1	307690852	307691860	0.028261414	null				Not found	6.33804	32.9034	-26.5654
Chr10:74926028-74927107	10	74926028	74927107	0.028261414	null				Not found	23.6197	49.9386	-26.3189
Chr6:9270732-9273878	6	9270732	9273878	0.028261414	null				Not found	16.6576	40.901	-24.2434
Chr11:1322868-1337086	11	1322868	1337086	0.028261414	null				Not found	11.3306	35.4617	-24.131
Chr18:4657711-4661542	18	4657711	4661542	0.028261414	null				Not found	23.072	47.0738	-24.0018
Chr5:43466076-43467079	5	43466076	43467079	0.028261414	null				Not found	28.1404	52.1026	-23.9622
Chr18:3610119-3612810	18	3610119	3612810	0.028261414	null				Not found	8.62077	32.4973	-23.8765
Chr7:129809797-129811032	7	129809797	129811032	0.030450568	null				Not found	17.8283	41.1087	-23.2804
Chr10:75061068-75062083	10	75061068	75062083	0.028566513	null				Not found	8.41512	31.5565	-23.1414
Chr5:43471622-43472544	5	43471622	43472544	0.028261414	null				Not found	39.3367	62.296	-22.9593
Chr13:215445090-215447161	13	215445090	215447161	0.028688157	null				Not found	7.78242	30.7107	-22.9283
Chr17:66314468-66315396	17	66314468	66315396	0.028261414	null				Not found	30.7154	53.4191	-22.7037
ChrX:543037-546252	X	543037	546252	0.04053645	null				Not found	7.49061	29.9265	-22.4359
Chr6:2830287-2832210	6	2830287	2832210	0.028261414	null				Not found	10.198	32.5876	-22.3896
Chr12:1774024-1775263	12	1774024	1775263	0.032877322	null				Not found	6.16312	28.313	-22.1499
ChrX:18629863-18646574	X	18629863	18646574	0.028261414	null				Not found	15.7953	37.722	-21.9267
Chr7:3189876-3191440	7	3189876	3191440	0.028261414	null				Not found	14.3078	36.2098	-21.902
Chr9:150460313-150463866	9	150460313	150463866	0.028261414	null				Not found	8.22427	30.0217	-21.7975
Chr7:128582148-128583175	7	128582148	128583175	0.035614084	null				Not found	16.3315	37.9698	-21.6383
Chr1:234348800-234370184	1	234348800	234370184	0.028261414	null				Not found	21.0906	42.6541	-21.5635
Chr9:41941789-41957335	9	41941789	41957335	0.028261414	null				Not found	8.71072	30.1827	-21.472
Chr6:145096796-145105953	6	145096796	145105953	0.028261414	null				Not found	16.9275	38.3604	-21.4329
Chr10:75085676-75086760	10	75085676	75086760	0.0315765	null				Not found	17.8479	39.1183	-21.2704
Chr1:13372319-13378340	1	13372319	13378340	0.028261414	null				Not found	7.42972	28.6817	-21.252
Chr3:141214811-141216456	3	141214811	141216456	0.028261414	null				Not found	7.3837	28.4318	-21.0481
Chr7:1398540-1399945	7	1398540	1399945	0.028261414	null				Not found	4.89552	25.8677	-20.9722
Chr3:141105405-141107489	3	141105405	141107489	0.028261414	null				Not found	3.53359	24.4713	-20.9377
Chr10:66729209-66731664	10	66729209	66731664	0.028261414	null				Not found	2.78798	23.6831	-20.8951
Chr14:63998418-64002604	14	63998418	64002604	0.033109363	null				Not found	2.49605	23.379	-20.8829
Chr10:76207845-76208868	10	76207845	76208868	0.02860034	null				Not found	19.427	40.2726	-20.8456
Chr17:68432621-68434254	17	68432621	68434254	0.028261414	null				Not found	22.9585	43.8022	-20.8437
Chr6:145051604-145057246	6	145051604	145057246	0.03989022	null				Not found	11.988	32.813	-20.8251
Chr6:68355031-68359240	6	68355031	68359240	0.028261414	null				Not found	16.5914	37.3753	-20.7839
Chr4:2992209-2994151	4	2992209	2994151	0.028261414	null				Not found	20.6795	41.4447	-20.7652
Chr6:151140074-151143059	6	151140074	151143059	0.028261414	null				Not found	9.10183	29.8211	-20.7193
Chr1:1618942-1620145	1	1618942	1620145	0.028261414	null				Not found	5.53245	26.1376	-20.6052
Chr11:1448585-1449874	11	1448585	1449874	0.04774394	null				Not found	25.3792	45.9251	-20.546
Chr5:110929774-110930940	5	110929774	110930940	0.045609754	null				Not found	15.7955	36.317	-20.5214
Chr6:56748870-56751297	6	56748870	56751297	0.028261414	null				Not found	10.8519	31.3139	-20.462
Chr4:2413556-2417297	4	2413556	2417297	0.028261414	null				Not found	18.9662	39.2885	-20.3223
Chr3:15709440-15713176	3	15709440	15713176	0.028261414	null				Not found	12.5122	32.6969	-20.1847
Chr9:81650592-81651893	9	81650592	81651893	0.028261414	null				Not found	1.63564	21.8195	-20.1839
Chr14:147637305-147639455	14	147637305	147639455	0.028261414	null				Not found	18.9707	39.1175	-20.1467
Chr17:68562570-68564007	17	68562570	68564007	0.029581152	null				Not found	15.7415	35.7842	-20.0428
Chr11:3969951-3971182	11	3969951	3971182	0.028261414	null				Not found	11.5962	31.5554	-19.9593
Chr6:10561509-10566422	6	10561509	10566422	0.028261414	null				Not found	8.59438	28.4062	-19.8118
Chr6:9166350-9169333	6	9166350	9169333	0.028261414	null				Not found	11.7841	31.542	-19.7579
Chr8:5064850-5068847	8	5064850	5068847	0.028261414	null				Not found	17.7324	37.4509	-19.7185
Chr2:144719116-144722867	2	144719116	144722867	0.028261414	null				Not found	7.73385	27.4138	-19.68
Chr8:3847707-3851190	8	3847707	3851190	0.028261414	null				Not found	6.86762	26.5	-19.6324
Chr1:223829236-223886918	1	223829236	223886918	0.03975446	null				Not found	4.83038	24.4608	-19.6304
ChrX:6811015-6824887	X	6811015	6824887	0.028261414	null				Not found	23.6932	43.285	-19.5918
Chr18:6213335-6215262	18	6213335	6215262	0.028261414	null				Not found	10.9758	30.5631	-19.5873
Chr9:7808565-7815233	9	7808565	7815233	0.028261414	null				Not found	14.9699	34.4949	-19.525
Chr2:153137891-153148257	2	153137891	153148257	0.028261414	null				Not found	8.40577	27.9064	-19.5006
Chr8:145509448-145512081	8	145509448	145512081	0.028261414	null				Not found	12.2603	31.7456	-19.4853
Chr12:63217074-63218098	12	63217074	63218098	0.047377747	null				Not found	25.6672	45.1319	-19.4647
Chr2:106910459-106920971	2	106910459	106920971	0.028261414	null				Not found	4.77726	24.24	-19.4628
Chr10:74014386-74016416	10	74014386	74016416	0.034493927	null				Not found	8.96313	28.3844	-19.4213
Chr6:84211404-84216555	6	84211404	84216555	0.028261414	null				Not found	9.0933	28.4438	-19.3505
Chr6:1576529-1577384	6	1576529	1577384	0.028261414	null				Not found	17.3295	36.6194	-19.29
ChrX:12938244-12943750	X	12938244	12943750	0.036924053	null				Not found	10.2582	29.5457	-19.2876
Chr17:59127765-59130461	17	59127765	59130461	0.028261414	null				Not found	23.2553	42.5399	-19.2846
Chr6:9246732-9249118	6	9246732	9249118	0.028261414	null				Not found	5.73021	25.0141	-19.2839
Chr8:272981-274208	8	272981	274208	0.028261414	null				Not found	12.9949	32.1984	-19.2035
Chr15:16274026-16290576	15	16274026	16290576	0.03195004	null				Not found	9.42454	28.6186	-19.194
Chr4:141194051-141197337	4	141194051	141197337	0.028261414	null				Not found	13.0301	32.1654	-19.1353
Chr11:74267205-74270405	11	74267205	74270405	0.028261414	null				Not found	11.3139	30.3114	-18.9975
Chr8:81731081-81737168	8	81731081	81737168	0.028261414	null				Not found	6.80089	25.7859	-18.985
ChrX:9938249-9943792	X	9938249	9943792	0.030875392	null				Not found	6.28531	25.2661	-18.9808
Chr3:2026560-2028136	3	2026560	2028136	0.028907625	null				Not found	19.9032	38.816	-18.9128
Chr15:30250416-30368959	15	30250416	30368959	0.028261414	null				Not found	6.32424	25.1936	-18.8694
Chr15:107817970-107839906	15	107817970	107839906	0.028261414	null				Not found	11.0204	29.8856	-18.8652
Chr10:75012046-75013487	10	75012046	75013487	0.028261414	null				Not found	7.67182	26.5174	-18.8455
Chr18:17817431-17821463	18	17817431	17821463	0.032516874	null				Not found	13.4827	32.3231	-18.8404
Chr6:150422621-150429496	6	150422621	150429496	0.03251708	null				Not found	16.8446	35.6306	-18.7859
Chr18:945152-946155	18	945152	946155	0.028261414	null				Not found	2.66959	21.4229	-18.7533
Chr12:13420499-13423262	12	13420499	13423262	0.028261414	null				Not found	23.532	42.2174	-18.6854
ChrX:88990392-89033123	X	88990392	89033123	0.028261414	null				Not found	9.91766	28.5831	-18.6654
Chr8:59344661-59353549	8	59344661	59353549	0.043108013	null				Not found	15.1611	33.8179	-18.6568
Chr2:114137648-114158090	2	114137648	114158090	0.029905368	null				Not found	8.60488	27.2227	-18.6178
Chr3:12158158-12167562	3	12158158	12167562	0.028261414	null				Not found	10.905	29.4401	-18.5352
Chr8:55008449-55021459	8	55008449	55021459	0.028261414	null				Not found	8.93685	27.4629	-18.5261
Chr6:15170279-15172854	6	15170279	15172854	0.028261414	null				Not found	8.54389	27.0374	-18.4935
Chr8:135353313-135367168	8	135353313	135367168	0.028261414	null				Not found	11.2181	29.6388	-18.4206
Chr1:308584119-308587719	1	308584119	308587719	0.028261414	null				Not found	20.3082	38.7145	-18.4063
ChrX:15182244-15186343	X	15182244	15186343	0.028261414	null				Not found	11.7018	30.1031	-18.4012
Chr6:3740570-3741804	6	3740570	3741804	0.028261414	null				Not found	13.615	31.957	-18.3421
Chr3:119529294-119532011	3	119529294	119532011	0.028261414	null				Not found	6.89774	25.2289	-18.3312
ChrX:15226606-15228796	X	15226606	15228796	0.028261414	null				Not found	8.69442	26.999	-18.3046
Chr2:1180961-1181967	2	1180961	1181967	0.028261414	null				Not found	18.4676	36.7059	-18.2383
Chr7:9971069-9973637	7	9971069	9973637	0.028261414	null				Not found	10.8968	29.1321	-18.2353
Chr6:60349725-60353298	6	60349725	60353298	0.028261414	null				Not found	5.54263	23.7676	-18.225
Chr13:218218649-218232101	13	218218649	218232101	0.028261414	null				Not found	23.133	41.289	-18.156
Chr3:63107531-63119057	3	63107531	63119057	0.028261414	null				Not found	6.10054	24.2143	-18.1138
Chr3:3519708-3522257	3	3519708	3522257	0.028261414	null				Not found	8.6188	26.6324	-18.0136
Chr6:60387958-60397143	6	60387958	60397143	0.028261414	null				Not found	13.1114	31.1238	-18.0124
Chr13:197496160-197524115	13	197496160	197524115	0.03741234	null				Not found	10.4932	28.47	-17.9769
Chr14:151149274-151150724	14	151149274	151150724	0.028261414	null				Not found	7.40792	25.3788	-17.9709
Chr6:154582663-154584622	6	154582663	154584622	0.032287464	null				Not found	8.277	26.211	-17.934
Chr3:25088-27042	3	25088	27042	0.031542316	null				Not found	7.57977	25.5093	-17.9295
Chr15:65139177-65197806	15	65139177	65197806	0.028261414	null				Not found	11.3508	29.2303	-17.8794
Chr6:2626737-2628115	6	2626737	2628115	0.032357655	null				Not found	7.36222	25.219	-17.8568
Chr3:122717380-122722773	3	122717380	122722773	0.028261414	null				Not found	10.6875	28.5318	-17.8443
ChrX:13946632-13949293	X	13946632	13949293	0.028261414	null				Not found	9.26431	27.0968	-17.8325
Chr17:64387906-64390954	17	64387906	64390954	0.028261414	null				Not found	13.6135	31.4081	-17.7946
Chr6:68400329-68405571	6	68400329	68405571	0.028261414	null				Not found	8.45647	26.2039	-17.7475
Chr11:1054980-1056586	11	1054980	1056586	0.03796827	null				Not found	11.4325	29.1758	-17.7433
Chr11:53544145-53551161	11	53544145	53551161	0.028261414	null				Not found	10.5581	28.2934	-17.7353
Chr2:146628736-146630409	2	146628736	146630409	0.028261414	null				Not found	13.5834	31.2954	-17.7119
Chr6:15812909-15820987	6	15812909	15820987	0.028261414	null				Not found	12.1233	29.8008	-17.6775
Chr9:12293765-12296476	9	12293765	12296476	0.028261414	null				Not found	14.4107	32.0663	-17.6556
Chr8:12161805-12166719	8	12161805	12166719	0.03519438	null				Not found	12.0786	29.6862	-17.6076
ChrX:62288393-62297494	X	62288393	62297494	0.033439234	null				Not found	10.0833	27.6889	-17.6057
Chr5:59612-60832	5	59612	60832	0.028647374	null				Not found	7.08835	24.6894	-17.601
Chr10:74322156-74323746	10	74322156	74323746	0.028261414	null				Not found	2.80873	20.3646	-17.5558
Chr7:31225876-31232627	7	31225876	31232627	0.028864821	null				Not found	14.0371	31.57	-17.5328
Chr5:12130234-12139950	5	12130234	12139950	0.028261414	null				Not found	13.7278	31.2596	-17.5319
Chr2:140445871-140449000	2	140445871	140449000	0.028261414	null				Not found	16.2413	33.6998	-17.4585
Chr5:81525359-81531710	5	81525359	81531710	0.028261414	null				Not found	11.9387	29.3655	-17.4268
Chr3:41285125-41286240	3	41285125	41286240	0.028261414	null				Not found	23.922	41.3231	-17.401
Chr6:138246519-138259969	6	138246519	138259969	0.028261414	null				Not found	12.9027	30.2793	-17.3766
Chr10:65081388-65084481	10	65081388	65084481	0.028261414	null				Not found	5.73822	23.0939	-17.3556
Chr4:1142821-1144113	4	1142821	1144113	0.028261414	null				Not found	4.93466	22.2486	-17.3139
Chr4:3012441-3014419	4	3012441	3014419	0.028261414	null				Not found	7.64731	24.9174	-17.2701
Chr1:10580101-10581691	1	10580101	10581691	0.028261414	null				Not found	15.4966	32.7479	-17.2513
ChrX:136337189-136348395	X	136337189	136348395	0.04995618	null				Not found	8.43169	25.6452	-17.2135
Chr6:9510426-9512684	6	9510426	9512684	0.028261414	null				Not found	9.15588	26.342	-17.1862
Chr8:3858539-3861539	8	3858539	3861539	0.028261414	null				Not found	3.0344	20.2164	-17.182
ChrX:138376723-138380976	X	138376723	138380976	0.028261414	null				Not found	5.5987	22.7644	-17.1657
ChrX:63750895-63762233	X	63750895	63762233	0.028261414	null				Not found	18.3611	35.5144	-17.1532
Chr6:152426962-152429360	6	152426962	152429360	0.028261414	null				Not found	3.96017	21.0186	-17.0585
Chr1:304155456-304158042	1	304155456	304158042	0.037769113	null				Not found	5.53441	22.5863	-17.0519
Chr5:73988557-73998769	5	73988557	73998769	0.028261414	null				Not found	6.44381	23.4604	-17.0165
Chr3:22383908-22401887	3	22383908	22401887	0.028261414	null				Not found	16.1751	33.1902	-17.015
Chr3:21156046-21159756	3	21156046	21159756	0.036673866	null				Not found	6.35106	23.3365	-16.9855
Chr8:5034856-5039335	8	5034856	5039335	0.028261414	null				Not found	9.96575	26.8801	-16.9143
Chr3:100815574-100870792	3	100815574	100870792	0.028261414	null				Not found	8.10423	24.968	-16.8638
Chr11:1480812-1501994	11	1480812	1501994	0.03071856	null				Not found	17.6474	34.4712	-16.8238
Chr8:3966024-3972092	8	3966024	3972092	0.028261414	null				Not found	10.0782	26.8776	-16.7994
Chr3:140318140-140321611	3	140318140	140321611	0.028261414	null				Not found	6.16047	22.9484	-16.788
Chr8:2867358-2870293	8	2867358	2870293	0.028261414	null				Not found	4.49327	21.2351	-16.7418
Chr2:85063003-85074985	2	85063003	85074985	0.028261414	null				Not found	12.0066	28.7458	-16.7392
Chr4:142387945-142389007	4	142387945	142389007	0.028261414	null				Not found	10.1097	26.8326	-16.7229
Chr12:24768273-24772536	12	24768273	24772536	0.028261414	null				Not found	5.46962	22.1779	-16.7083
Chr1:186201593-186205082	1	186201593	186205082	0.028261414	null				Not found	10.6401	27.3369	-16.6968
Chr4:60172137-60189278	4	60172137	60189278	0.028261414	null				Not found	16.8163	33.5041	-16.6878
Chr2:144354862-144363722	2	144354862	144363722	0.03210453	null				Not found	10.5794	27.2534	-16.6739
Chr6:50401474-50404192	6	50401474	50404192	0.028963408	null				Not found	28.577	45.2276	-16.6507
Chr15:154799613-154800396	15	154799613	154800396	0.032098096	null				Not found	16.9045	33.5259	-16.6214
Chr11:74981072-74984193	11	74981072	74984193	0.028261414	null				Not found	13.4877	30.106	-16.6183
Chr2:152652682-152666381	2	152652682	152666381	0.028261414	null				Not found	13.213	29.8042	-16.5912
Chr1:164438757-164446669	1	164438757	164446669	0.03841246	null				Not found	16.8626	33.4504	-16.5878
ChrX:37776601-37787388	X	37776601	37787388	0.028261414	null				Not found	14.641	31.2261	-16.5851
Chr5:108449288-108453832	5	108449288	108453832	0.028261414	null				Not found	12.5046	29.0836	-16.579
Chr11:3030076-3031619	11	3030076	3031619	0.028261414	null				Not found	18.0937	34.6656	-16.5719
Chr12:7106055-7109605	12	7106055	7109605	0.028261414	null				Not found	5.73039	22.2852	-16.5548
Chr14:106154515-106225713	14	106154515	106225713	0.030211007	null				Not found	16.75	33.2773	-16.5273
Chr11:75207617-75212954	11	75207617	75212954	0.028261414	null				Not found	9.07324	25.5963	-16.523
Chr8:31386407-31392441	8	31386407	31392441	0.028261414	null				Not found	11.8859	28.2884	-16.4025
Chr4:87046226-87048643	4	87046226	87048643	0.028261414	null				Not found	4.52735	20.9189	-16.3916
Chr12:1578323-1579610	12	1578323	1579610	0.028261414	null				Not found	14.7529	31.0919	-16.3389
Chr10:74791127-74794502	10	74791127	74794502	0.028261414	null				Not found	12.0428	28.3729	-16.3301
Chr9:47296138-47303221	9	47296138	47303221	0.028261414	null				Not found	9.10485	25.4221	-16.3172
Chr14:134832535-134836262	14	134832535	134836262	0.028261414	null				Not found	15.2204	31.5296	-16.3093
Chr11:8051412-8055046	11	8051412	8055046	0.028261414	null				Not found	13.3861	29.6662	-16.2801
Chr16:65559803-65576947	16	65559803	65576947	0.028261414	null				Not found	7.27963	23.5509	-16.2713
Chr13:75039366-75045058	13	75039366	75045058	0.028261414	null				Not found	11.8441	28.1136	-16.2694
Chr10:75105101-75107433	10	75105101	75107433	0.028261414	null				Not found	31.8242	48.0899	-16.2657
Chr15:2491339-2554503	15	2491339	2554503	0.028261414	null				Not found	4.86777	21.1323	-16.2645
Chr8:78361432-78365842	8	78361432	78365842	0.037921857	null				Not found	8.98219	25.2461	-16.264
Chr3:1223452-1225128	3	1223452	1225128	0.03324548	null				Not found	15.4123	31.6486	-16.2363
Chr11:3180122-3182000	11	3180122	3182000	0.029905368	null				Not found	11.0342	27.2622	-16.2281
Chr12:10413254-10418593	12	10413254	10418593	0.028261414	null				Not found	11.5646	27.7678	-16.2032
Chr15:145636885-145639927	15	145636885	145639927	0.028261414	null				Not found	6.52011	22.6921	-16.172
Chr14:91725744-91738715	14	91725744	91738715	0.028261414	null				Not found	21.3612	37.5323	-16.1712
Chr13:187910918-187927079	13	187910918	187927079	0.028261414	null				Not found	10.4463	26.5442	-16.0978
ChrX:8222266-8246355	X	8222266	8246355	0.028261414	null				Not found	8.92055	25.0127	-16.0922
Chr18:4666709-4669158	18	4666709	4669158	0.028261414	null				Not found	15.4563	31.5384	-16.0821
Chr10:72513280-72515594	10	72513280	72515594	0.028261414	null				Not found	8.85867	24.9109	-16.0522
Chr1:131162605-131247199	1	131162605	131247199	0.028261414	null				Not found	17.8105	33.8557	-16.0451
Chr8:3685173-3687299	8	3685173	3687299	0.028261414	null				Not found	9.216	25.2591	-16.0431
ChrX:126455448-126459032	X	126455448	126459032	0.028261414	null				Not found	6.75302	22.791	-16.038
ChrX:118763720-118790084	X	118763720	118790084	0.028261414	null				Not found	7.53518	23.5667	-16.0315
Chr15:88782074-88786164	15	88782074	88786164	0.028261414	null				Not found	7.45316	23.4608	-16.0077
Chr2:150174181-150178011	2	150174181	150178011	0.03948735	null				Not found	13.1254	29.1062	-15.9808
Chr8:84711698-84729192	8	84711698	84729192	0.028261414	null				Not found	9.34672	25.325	-15.9783
Chr3:141094648-141097250	3	141094648	141097250	0.028261414	null				Not found	5.39613	21.3648	-15.9687
Chr11:1392161-1394843	11	1392161	1394843	0.037646677	null				Not found	15.243	31.2053	-15.9623
Chr2:10060979-10071015	2	10060979	10071015	0.028261414	null				Not found	12.3827	28.324	-15.9413
Chr14:96206830-96214028	14	96206830	96214028	0.028261414	null				Not found	11.2284	27.1622	-15.9338
Chr4:3846580-3848553	4	3846580	3848553	0.033889573	null				Not found	2.55479	18.4745	-15.9197
Chr6:62888955-62895283	6	62888955	62895283	0.032021612	null				Not found	8.31183	24.2081	-15.8963
Chr6:135150868-135160440	6	135150868	135160440	0.028261414	null				Not found	9.60239	25.4943	-15.8919
ChrX:14992729-14999486	X	14992729	14999486	0.028261414	null				Not found	13.8052	29.6771	-15.872
Chr11:10981550-10990118	11	10981550	10990118	0.03110687	null				Not found	4.90013	20.7591	-15.859
Chr11:41909211-41927265	11	41909211	41927265	0.028261414	null				Not found	2.78632	18.6359	-15.8496
Chr11:29896853-29930892	11	29896853	29930892	0.04111325	null				Not found	4.48294	20.3318	-15.8488
Chr9:6744453-6754810	9	6744453	6754810	0.028261414	null				Not found	10.3626	26.1535	-15.7909
Chr4:122172751-122179422	4	122172751	122179422	0.028261414	null				Not found	16.0701	31.8408	-15.7707
Chr4:5265936-5272786	4	5265936	5272786	0.028261414	null				Not found	6.80935	22.5559	-15.7465
Chr11:728901-730789	11	728901	730789	0.028261414	null				Not found	11.5029	27.2473	-15.7444
Chr14:140358877-140364333	14	140358877	140364333	0.044983875	null				Not found	35.8397	51.5519	-15.7121
Chr17:68795788-68797413	17	68795788	68797413	0.028261414	null				Not found	4.99304	20.7031	-15.7101
Chr17:68609545-68611486	17	68609545	68611486	0.028261414	null				Not found	16.8299	32.5146	-15.6847
ChrX:15188949-15192578	X	15188949	15192578	0.028261414	null				Not found	8.97021	24.6485	-15.6783
Chr9:16746994-16754708	9	16746994	16754708	0.028261414	null				Not found	8.25834	23.9274	-15.6691
Chr9:59731953-59736001	9	59731953	59736001	0.028261414	null				Not found	9.47353	25.1055	-15.632
Chr6:64823142-64825246	6	64823142	64825246	0.028261414	null				Not found	3.77114	19.4005	-15.6294
Chr10:67295228-67299269	10	67295228	67299269	0.029378034	null				Not found	9.53858	25.1562	-15.6176
Chr6:45413259-45420992	6	45413259	45420992	0.028261414	null				Not found	8.34487	23.9328	-15.588
Chr4:8938735-8943052	4	8938735	8943052	0.033576682	null				Not found	7.64488	23.2181	-15.5732
Chr12:15867127-15872177	12	15867127	15872177	0.033688545	null				Not found	9.2694	24.835	-15.5656
Chr11:17708974-17737125	11	17708974	17737125	0.028261414	null				Not found	6.23993	21.7762	-15.5363
Chr6:8007740-8010195	6	8007740	8010195	0.031400334	null				Not found	13.9257	29.4589	-15.5332
Chr1:278787412-278797084	1	278787412	278797084	0.028261414	null				Not found	9.7354	25.2573	-15.5219
Chr7:49355379-49363162	7	49355379	49363162	0.045117613	null				Not found	4.01625	19.5371	-15.5208
ChrX:16028224-16035646	X	16028224	16035646	0.030083446	null				Not found	6.55192	22.06	-15.508
Chr7:11219925-11225990	7	11219925	11225990	0.040128484	null				Not found	22.6961	38.1972	-15.5011
Chr1:84132804-84137142	1	84132804	84137142	0.031517405	null				Not found	12.3233	27.7998	-15.4765
Chr13:211293212-211296873	13	211293212	211296873	0.028261414	null				Not found	14.2942	29.7395	-15.4453
Chr9:145210060-145213921	9	145210060	145213921	0.04613326	null				Not found	6.93529	22.378	-15.4427
Chr1:184124585-184131274	1	184124585	184131274	0.028261414	null				Not found	7.85176	23.278	-15.4262
Chr10:73450027-73451807	10	73450027	73451807	0.028261414	null				Not found	6.81788	22.2431	-15.4252
Chr16:66105595-66131187	16	66105595	66131187	0.028261414	null				Not found	11.316	26.7324	-15.4164
Chr4:48686262-48713475	4	48686262	48713475	0.028261414	null				Not found	13.1943	28.6085	-15.4142
Chr15:87773536-87779727	15	87773536	87779727	0.028261414	null				Not found	6.13044	21.5281	-15.3977
Chr12:55163760-55166039	12	55163760	55166039	0.028261414	null				Not found	9.52732	24.9009	-15.3736
ChrX:43709180-43716594	X	43709180	43716594	0.028261414	null				Not found	9.83097	25.2008	-15.3699
Chr10:75124002-75125451	10	75124002	75125451	0.028261414	null				Not found	3.65971	18.9894	-15.3297
Chr3:15551699-15557499	3	15551699	15557499	0.02927394	null				Not found	6.77085	22.0775	-15.3067
Chr15:49352502-49364513	15	49352502	49364513	0.028261414	null				Not found	2.46258	17.7436	-15.281
Chr9:68859089-68879374	9	68859089	68879374	0.028261414	null				Not found	21.0029	36.265	-15.2622
Chr11:3127843-3129833	11	3127843	3129833	0.04992889	null				Not found	29.0102	44.2702	-15.26
Chr16:72310171-72390140	16	72310171	72390140	0.037130043	null				Not found	21.014	36.2573	-15.2432
Chr17:47128296-47133787	17	47128296	47133787	0.028261414	null				Not found	4.6389	19.8813	-15.2424
Chr12:60978316-60980145	12	60978316	60980145	0.028261414	null				Not found	14.3531	29.5823	-15.2292
Chr3:94210296-94234678	3	94210296	94234678	0.03077922	null				Not found	14.3956	29.5936	-15.198
Chr9:41441890-41453302	9	41441890	41453302	0.028261414	null				Not found	17.4029	32.5586	-15.1556
Chr4:75731624-75742791	4	75731624	75742791	0.028261414	null				Not found	8.77791	23.8957	-15.1178
Chr8:290126-291862	8	290126	291862	0.03194246	null				Not found	3.89437	18.9981	-15.1037
Chr3:27492754-27497991	3	27492754	27497991	0.028261414	null				Not found	4.30321	19.3806	-15.0774
Chr13:78762037-78766037	13	78762037	78766037	0.028261414	null				Not found	7.07953	22.1517	-15.0722
ChrX:54454256-54476434	X	54454256	54476434	0.028261414	null				Not found	14.0887	29.1511	-15.0624
Chr13:73977229-73983866	13	73977229	73983866	0.028261414	null				Not found	9.17956	24.2376	-15.0581
Chr3:41251207-41252311	3	41251207	41252311	0.028261414	null				Not found	4.29925	19.3392	-15.0399
Chr6:12143067-12149670	6	12143067	12149670	0.028261414	null				Not found	4.97093	19.9982	-15.0273
ChrX:17874172-17883737	X	17874172	17883737	0.028261414	null				Not found	3.15926	18.1755	-15.0163
Chr9:71966657-71971385	9	71966657	71971385	0.028261414	null				Not found	11.1866	26.1968	-15.0102
Chr6:137042811-137048257	6	137042811	137048257	0.039545186	null				Not found	15.8903	30.8884	-14.9981
Chr12:51999822-52003729	12	51999822	52003729	0.028261414	null				Not found	6.49112	21.4754	-14.9842
Chr11:23693907-23697714	11	23693907	23697714	0.030952092	null				Not found	4.27274	19.2341	-14.9614
Chr13:27581994-27592501	13	27581994	27592501	0.028261414	null				Not found	8.83542	23.7919	-14.9564
Chr13:192188776-192197615	13	192188776	192197615	0.028261414	null				Not found	9.50232	24.4546	-14.9523
Chr5:111099341-111101914	5	111099341	111101914	0.028261414	null				Not found	8.58131	23.5261	-14.9448
Chr9:14947904-14953305	9	14947904	14953305	0.028261414	null				Not found	4.17249	19.1051	-14.9326
Chr13:98578175-98589359	13	98578175	98589359	0.028261414	null				Not found	7.8229	22.7524	-14.9295
Chr1:33019035-33029588	1	33019035	33029588	0.028478732	null				Not found	11.8537	26.7671	-14.9134
Chr8:60844616-60857565	8	60844616	60857565	0.028261414	null				Not found	14.2309	29.143	-14.9121
Chr1:11773545-11830569	1	11773545	11830569	0.028261414	null				Not found	15.85	30.7546	-14.9046
ChrX:86863130-86906073	X	86863130	86906073	0.028261414	null				Not found	7.86728	22.762	-14.8947
ChrX:138891810-138895306	X	138891810	138895306	0.028261414	null				Not found	15.6947	30.576	-14.8813
Chr6:2896452-2898339	6	2896452	2898339	0.028261414	null				Not found	3.16619	18.0324	-14.8662
Chr4:135138419-135141402	4	135138419	135141402	0.028261414	null				Not found	12.3149	27.181	-14.8661
Chr10:1581554-1585406	10	1581554	1585406	0.028261414	null				Not found	11.0882	25.9542	-14.8659
Chr4:1367811-1369828	4	1367811	1369828	0.028261414	null				Not found	2.1957	17.0615	-14.8659
Chr6:31634389-31642399	6	31634389	31642399	0.028261414	null				Not found	16.9317	31.7902	-14.8585
Chr17:63726898-63730407	17	63726898	63730407	0.029938446	null				Not found	11.2291	26.0859	-14.8568
Chr7:3229299-3231109	7	3229299	3231109	0.041887727	null				Not found	11.7633	26.6189	-14.8557
ChrX:129286289-129298999	X	129286289	129298999	0.028261414	null				Not found	8.37647	23.2212	-14.8447
Chr10:66746981-66749233	10	66746981	66749233	0.028261414	null				Not found	17.4763	32.2978	-14.8215
Chr9:22700399-22704016	9	22700399	22704016	0.028261414	null				Not found	6.843	21.6637	-14.8207
Chr2:47407570-47415314	2	47407570	47415314	0.028261414	null				Not found	5.76273	20.5766	-14.8139
Chr8:58012860-58018934	8	58012860	58018934	0.028261414	null				Not found	12.1442	26.9411	-14.7968
Chr6:143791433-143797156	6	143791433	143797156	0.028261414	null				Not found	13.4589	28.2439	-14.785
Chr1:300555487-300558429	1	300555487	300558429	0.028261414	null				Not found	7.934	22.7066	-14.7726
Chr10:2120211-2122628	10	2120211	2122628	0.028261414	null				Not found	15.3332	30.0911	-14.7579
Chr4:119952994-119960583	4	119952994	119960583	0.028261414	null				Not found	7.15625	21.9122	-14.7559
ChrX:138322433-138329944	X	138322433	138329944	0.028261414	null				Not found	6.90903	21.6389	-14.7298
ChrX:34053334-34067902	X	34053334	34067902	0.028261414	null				Not found	17.4947	32.203	-14.7083
Chr1:304198283-304201830	1	304198283	304201830	0.045016516	null				Not found	8.49401	23.1045	-14.6105
Chr10:70357647-70360914	10	70357647	70360914	0.028261414	null				Not found	4.44678	19.0486	-14.6018
Chr9:90559216-90575185	9	90559216	90575185	0.049860045	null				Not found	12.5821	27.1838	-14.6017
Chr9:13159072-13163910	9	13159072	13163910	0.028261414	null				Not found	8.40359	22.9894	-14.5859
Chr12:980727-981798	12	980727	981798	0.032649998	null				Not found	22.3968	36.9647	-14.5679
Chr8:1912937-1915605	8	1912937	1915605	0.028261414	null				Not found	2.77807	17.3294	-14.5513
Chr1:6136846-6144145	1	6136846	6144145	0.028261414	null				Not found	11.2363	25.7826	-14.5463
Chr15:29126541-29207768	15	29126541	29207768	0.028261414	null				Not found	11.023	25.5493	-14.5262
Chr1:565716-569999	1	565716	569999	0.028261414	null				Not found	7.65981	22.1744	-14.5146
Chr10:69755474-69757854	10	69755474	69757854	0.028261414	null				Not found	8.41069	22.922	-14.5113
Chr8:73207914-73219365	8	73207914	73219365	0.028261414	null				Not found	7.51697	22.0054	-14.4885
Chr9:48407280-48411744	9	48407280	48411744	0.028261414	null				Not found	8.45587	22.9403	-14.4845
Chr8:84516269-84529735	8	84516269	84529735	0.03073163	null				Not found	6.08539	20.5148	-14.4294
Chr7:2565794-2567434	7	2565794	2567434	0.028261414	null				Not found	2.235	16.6625	-14.4275
Chr8:85332620-85339672	8	85332620	85339672	0.028261414	null				Not found	9.22829	23.6532	-14.4249
Chr9:8537544-8540424	9	8537544	8540424	0.028261414	null				Not found	5.54059	19.9596	-14.419
Chr4:141774501-141777210	4	141774501	141777210	0.028261414	null				Not found	5.50362	19.9165	-14.4129
Chr11:84114222-84115550	11	84114222	84115550	0.028261414	null				Not found	2.14659	16.5556	-14.409
ChrX:3623563-3626314	X	3623563	3626314	0.028261414	null				Not found	20.576	34.9802	-14.4043
Chr3:34243798-34252716	3	34243798	34252716	0.028261414	null				Not found	8.53743	22.9368	-14.3994
Chr8:3977341-3980069	8	3977341	3980069	0.028261414	null				Not found	23.7383	38.1362	-14.3979
Chr4:3780498-3783960	4	3780498	3783960	0.028261414	null				Not found	5.08779	19.4849	-14.3971
Chr8:65848876-65878029	8	65848876	65878029	0.028261414	null				Not found	11.5464	25.9369	-14.3905
Chr10:2000885-2009132	10	2000885	2009132	0.028261414	null				Not found	10.7874	25.1379	-14.3505
Chr8:90131386-90139371	8	90131386	90139371	0.028261414	null				Not found	5.09738	19.4424	-14.345
Chr5:46064961-46077362	5	46064961	46077362	0.028261414	null				Not found	10.8146	25.1564	-14.3418
ChrX:2833676-2843569	X	2833676	2843569	0.028261414	null				Not found	11.1286	25.4521	-14.3235
Chr11:1726734-1728535	11	1726734	1728535	0.03226858	null				Not found	20.055	34.3466	-14.2916
Chr2:150138833-150142464	2	150138833	150142464	0.028261414	null				Not found	22.006	36.2846	-14.2786
Chr15:7268976-7285996	15	7268976	7285996	0.031458877	null				Not found	12.9469	27.2013	-14.2544
Chr4:11016805-11021291	4	11016805	11021291	0.028261414	null				Not found	10.2899	24.5056	-14.2156
Chr11:73466160-73469182	11	73466160	73469182	0.028261414	null				Not found	2.67844	16.8907	-14.2122
Chr1:237010660-237031704	1	237010660	237031704	0.028261414	null				Not found	10.8606	25.0244	-14.1638
Chr18:59950663-59953711	18	59950663	59953711	0.045056008	null				Not found	14.9865	29.1426	-14.1561
Chr3:141221362-141224424	3	141221362	141224424	0.028261414	null				Not found	7.90181	22.0464	-14.1446
Chr3:3260385-3262766	3	3260385	3262766	0.028261414	null				Not found	8.50735	22.6349	-14.1275
Chr14:146241496-146247431	14	146241496	146247431	0.028261414	null				Not found	18.0325	32.1367	-14.1041
Chr1:277821389-277833649	1	277821389	277833649	0.042426232	null				Not found	20.5589	34.6556	-14.0967
Chr4:1153864-1155978	4	1153864	1155978	0.028261414	null				Not found	5.57867	19.6683	-14.0896
Chr3:127950540-127959329	3	127950540	127959329	0.028261414	null				Not found	10.5699	24.6006	-14.0307
Chr16:77619001-77623852	16	77619001	77623852	0.028261414	null				Not found	6.79849	20.8175	-14.019
Chr9:103292328-103306056	9	103292328	103306056	0.034706466	null				Not found	10.1488	24.1604	-14.0116
Chr5:81370502-81375066	5	81370502	81375066	0.04594206	null				Not found	8.42092	22.4302	-14.0093
Chr10:40743439-40763675	10	40743439	40763675	0.028261414	null				Not found	4.49856	18.4864	-13.9878
Chr14:41852519-41859147	14	41852519	41859147	0.028261414	null				Not found	7.23977	21.2143	-13.9745
Chr3:82090428-82105190	3	82090428	82105190	0.028261414	null				Not found	7.32345	21.2884	-13.9649
ChrX:5782775-5785934	X	5782775	5785934	0.028261414	null				Not found	16.9834	30.9415	-13.9581
Chr8:73192125-73207913	8	73192125	73207913	0.028261414	null				Not found	9.71812	23.6727	-13.9546
Chr9:103714284-103731411	9	103714284	103731411	0.028261414	null				Not found	11.3666	25.301	-13.9345
Chr18:2498071-2506279	18	2498071	2506279	0.0285636	null				Not found	4.9469	18.878	-13.9311
Chr13:216963246-216968212	13	216963246	216968212	0.028261414	null				Not found	5.41369	19.3115	-13.8978
Chr6:4310484-4313236	6	4310484	4313236	0.028261414	null				Not found	17.3181	31.2154	-13.8973
Chr17:47563755-47567281	17	47563755	47567281	0.028261414	null				Not found	7.0408	20.9277	-13.8869
Chr11:74416582-74420265	11	74416582	74420265	0.028261414	null				Not found	12.9429	26.7878	-13.8449
Chr7:1712053-1714532	7	1712053	1714532	0.028261414	null				Not found	6.45206	20.2761	-13.824
Chr8:871906-873221	8	871906	873221	0.028261414	null				Not found	15.4432	29.2629	-13.8197
Chr4:2297059-2298451	4	2297059	2298451	0.032658093	null				Not found	14.6499	28.4686	-13.8187
Chr1:266694415-266701152	1	266694415	266701152	0.028261414	null				Not found	17.2868	31.0989	-13.8121
Chr11:835872-840970	11	835872	840970	0.028261414	null				Not found	24.2619	38.0688	-13.8069
Chr1:9501592-9508456	1	9501592	9508456	0.028261414	null				Not found	9.50656	23.3134	-13.8069
Chr11:76324333-76330057	11	76324333	76330057	0.028261414	null				Not found	7.3205	21.1259	-13.8054
Chr2:141913934-141919143	2	141913934	141919143	0.028261414	null				Not found	11.9179	25.6981	-13.7802
ChrX:12531909-12552074	X	12531909	12552074	0.028261414	null				Not found	18.4951	32.2737	-13.7786
ChrX:55937987-56011305	X	55937987	56011305	0.028261414	null				Not found	11.4928	25.2603	-13.7675
Chr7:131350634-131351926	7	131350634	131351926	0.028261414	null				Not found	6.43079	20.1875	-13.7568
Chr10:66851469-66853919	10	66851469	66853919	0.028261414	null				Not found	12.684	26.4257	-13.7417
Chr12:57677885-57680719	12	57677885	57680719	0.028261414	null				Not found	6.56786	20.2931	-13.7252
Chr9:153292876-153295429	9	153292876	153295429	0.028261414	null				Not found	0.677266	14.389	-13.7117
Chr12:48084683-48089560	12	48084683	48089560	0.04297951	null				Not found	6.959	20.6465	-13.6875
Chr8:101216911-101231866	8	101216911	101231866	0.042277277	null				Not found	6.37182	20.0458	-13.6739
Chr6:89504684-89511631	6	89504684	89511631	0.028261414	null				Not found	8.53204	22.1968	-13.6648
Chr2:23420711-23433145	2	23420711	23433145	0.028261414	null				Not found	13.8511	27.4899	-13.6388
Chr4:2454082-2455590	4	2454082	2455590	0.03054261	null				Not found	19.8819	33.5195	-13.6376
Chr15:105771938-105779923	15	105771938	105779923	0.028261414	null				Not found	14.2792	27.9094	-13.6302
Chr16:85702316-85703898	16	85702316	85703898	0.034806866	null				Not found	2.30329	15.9305	-13.6272
Chr8:18089684-18098517	8	18089684	18098517	0.028261414	null				Not found	6.7126	20.3319	-13.6193
Chr2:42898214-42903564	2	42898214	42903564	0.028261414	null				Not found	8.03655	21.6441	-13.6075
Chr2:126100381-126170167	2	126100381	126170167	0.028261414	null				Not found	6.46251	20.0529	-13.5904
ChrX:104059588-104063821	X	104059588	104063821	0.028261414	null				Not found	15.2867	28.8714	-13.5847
Chr3:1368669-1369719	3	1368669	1369719	0.028261414	null				Not found	6.12313	19.7036	-13.5805
Chr11:2693639-2696063	11	2693639	2696063	0.029760055	null				Not found	13.8801	27.46	-13.5799
ChrX:60083601-60103836	X	60083601	60103836	0.028261414	null				Not found	15.275	28.8478	-13.5728
Chr8:1948918-1960396	8	1948918	1960396	0.03190492	null				Not found	5.58624	19.1432	-13.557
Chr13:72645752-72659583	13	72645752	72659583	0.039982755	null				Not found	10.2527	23.8083	-13.5556
Chr1:166862151-166875890	1	166862151	166875890	0.028261414	null				Not found	6.44505	19.9998	-13.5548
Chr8:81233050-81236617	8	81233050	81236617	0.045952514	null				Not found	17.6971	31.2498	-13.5527
Chr6:41322821-41334292	6	41322821	41334292	0.028261414	null				Not found	6.81505	20.3634	-13.5484
Chr4:90041605-90055430	4	90041605	90055430	0.028261414	null				Not found	11.1387	24.684	-13.5452
Chr12:59741835-59746222	12	59741835	59746222	0.032146953	null				Not found	16.3561	29.8769	-13.5208
Chr10:54745615-54758426	10	54745615	54758426	0.028261414	null				Not found	13.5348	27.055	-13.5202
Chr11:68424610-68430910	11	68424610	68430910	0.028261414	null				Not found	7.28629	20.8059	-13.5197
Chr4:12528863-12532605	4	12528863	12532605	0.028261414	null				Not found	13.7035	27.2138	-13.5103
Chr6:155888335-155891358	6	155888335	155891358	0.028261414	null				Not found	15.0449	28.5457	-13.5008
Chr6:86961059-86966178	6	86961059	86966178	0.028261414	null				Not found	11.7922	25.2627	-13.4705
Chr9:78318544-78331440	9	78318544	78331440	0.028261414	null				Not found	9.12192	22.5848	-13.4629
Chr17:50725810-50730999	17	50725810	50730999	0.028261414	null				Not found	11.0732	24.5162	-13.443
Chr9:43381160-43393746	9	43381160	43393746	0.028261414	null				Not found	5.79145	19.2341	-13.4427
Chr11:304800-305969	11	304800	305969	0.037527826	null				Not found	21.9863	35.4194	-13.4331
ChrX:118958447-118977894	X	118958447	118977894	0.028261414	null				Not found	7.93112	21.3617	-13.4306
Chr6:145138460-145144957	6	145138460	145144957	0.028261414	null				Not found	5.78089	19.2062	-13.4253
Chr3:57332060-57340622	3	57332060	57340622	0.028261414	null				Not found	6.10361	19.5092	-13.4056
Chr18:1043437-1044591	18	1043437	1044591	0.028261414	null				Not found	4.45439	17.8579	-13.4035
Chr10:500340-507894	10	500340	507894	0.028261414	null				Not found	4.43477	17.8319	-13.3971
Chr12:13465745-13471938	12	13465745	13471938	0.02836255	null				Not found	5.68314	19.0735	-13.3903
Chr5:67144025-67149486	5	67144025	67149486	0.028261414	null				Not found	4.71653	18.1001	-13.3836
Chr6:40643334-40646870	6	40643334	40646870	0.034003153	null				Not found	12.5018	25.8695	-13.3677
ChrX:2193151-2198541	X	2193151	2198541	0.03202478	null				Not found	9.70741	23.0603	-13.3529
Chr1:8936452-8939474	1	8936452	8939474	0.028261414	null				Not found	5.33025	18.6776	-13.3474
Chr14:142218638-142223297	14	142218638	142223297	0.028261414	null				Not found	7.54486	20.8892	-13.3443
Chr6:16451017-16457089	6	16451017	16457089	0.028261414	null				Not found	9.6228	22.9637	-13.3409
Chr14:2935283-2940317	14	2935283	2940317	0.028261414	null				Not found	9.35607	22.6935	-13.3374
Chr4:3000489-3002325	4	3000489	3002325	0.028261414	null				Not found	5.4781	18.815	-13.3369
Chr7:12927989-12931666	7	12927989	12931666	0.043108013	null				Not found	7.57145	20.9069	-13.3354
Chr6:3865353-3866655	6	3865353	3866655	0.028261414	null				Not found	12.5611	25.8947	-13.3336
Chr12:56989944-56991784	12	56989944	56991784	0.046501074	null				Not found	17.8208	31.1485	-13.3277
Chr15:21204670-21220435	15	21204670	21220435	0.03449208	null				Not found	16.9395	30.2606	-13.3211
Chr12:21292658-21295934	12	21292658	21295934	0.028261414	null				Not found	8.63672	21.9507	-13.314
Chr13:141342972-141348366	13	141342972	141348366	0.028261414	null				Not found	7.22304	20.5208	-13.2977
Chr4:117416517-117420875	4	117416517	117420875	0.028261414	null				Not found	4.54408	17.8417	-13.2976
Chr9:1493065-1494453	9	1493065	1494453	0.028261414	null				Not found	14.5822	27.8781	-13.2959
Chr10:67895678-67899745	10	67895678	67899745	0.028261414	null				Not found	5.63165	18.9251	-13.2934
Chr14:91155211-91170963	14	91155211	91170963	0.028261414	null				Not found	9.86685	23.1455	-13.2787
Chr6:84417638-84427830	6	84417638	84427830	0.028261414	null				Not found	14.6903	27.9503	-13.26
Chr18:2194963-2197093	18	2194963	2197093	0.028261414	null				Not found	9.64815	22.8882	-13.2401
Chr5:14494313-14499353	5	14494313	14499353	0.03894872	null				Not found	6.29598	19.5207	-13.2248
Chr9:93978144-94000935	9	93978144	94000935	0.03733816	null				Not found	10.5761	23.7928	-13.2167
Chr3:100408667-100417674	3	100408667	100417674	0.028261414	null				Not found	12.9981	26.2122	-13.2141
Chr15:115213812-115219978	15	115213812	115219978	0.039523687	null				Not found	9.98942	23.1997	-13.2103
ChrX:53338836-53346412	X	53338836	53346412	0.028261414	null				Not found	11.9554	25.1626	-13.2072
Chr8:120308198-120321223	8	120308198	120321223	0.028261414	null				Not found	3.03716	16.2327	-13.1956
Chr12:4301739-4304853	12	4301739	4304853	0.028261414	null				Not found	9.39425	22.5814	-13.1872
Chr9:122193561-122210335	9	122193561	122210335	0.028261414	null				Not found	8.18212	21.349	-13.1669
Chr17:69265017-69266958	17	69265017	69266958	0.028261414	null				Not found	5.26363	18.4124	-13.1488
Chr10:12641367-12646394	10	12641367	12646394	0.028261414	null				Not found	14.8365	27.9713	-13.1348
Chr8:145094124-145096191	8	145094124	145096191	0.028261414	null				Not found	16.0762	29.2024	-13.1261
Chr2:66933461-66943146	2	66933461	66943146	0.028261414	null				Not found	7.84008	20.9592	-13.1192
Chr2:113276555-113297562	2	113276555	113297562	0.03616107	null				Not found	7.96296	21.071	-13.108
Chr1:73649473-73670203	1	73649473	73670203	0.028261414	null				Not found	7.95164	21.0529	-13.1012
ChrX:10573946-10579345	X	10573946	10579345	0.028261414	null				Not found	13.587	26.6863	-13.0993
Chr2:75843946-75847315	2	75843946	75847315	0.028261414	null				Not found	7.85847	20.9433	-13.0848
Chr8:81538843-81545592	8	81538843	81545592	0.028261414	null				Not found	4.9536	18.0153	-13.0617
ChrX:65428959-65525655	X	65428959	65525655	0.028261414	null				Not found	12.0683	25.1042	-13.036
Chr4:77653214-77660787	4	77653214	77660787	0.028261414	null				Not found	5.25036	18.2729	-13.0226
Chr9:25120276-25131314	9	25120276	25131314	0.03398487	null				Not found	11.5257	24.5388	-13.0131
Chr1:280115502-280129242	1	280115502	280129242	0.028261414	null				Not found	12.4549	25.4624	-13.0075
Chr15:41873209-41881502	15	41873209	41881502	0.028261414	null				Not found	13.0776	26.0843	-13.0067
ChrX:124491119-124495474	X	124491119	124495474	0.028261414	null				Not found	9.04705	22.039	-12.9919
Chr2:141140351-141149550	2	141140351	141149550	0.028261414	null				Not found	15.402	28.3839	-12.9819
Chr3:46681715-46689142	3	46681715	46689142	0.028261414	null				Not found	19.998	32.9583	-12.9603
Chr5:10890450-10894920	5	10890450	10894920	0.028261414	null				Not found	6.07226	19.0037	-12.9315
Chr16:84355139-84356853	16	84355139	84356853	0.028261414	null				Not found	3.55849	16.4781	-12.9196
Chr8:6018370-6022027	8	6018370	6022027	0.035215463	null				Not found	6.78948	19.7072	-12.9177
Chr9:75016352-75031376	9	75016352	75031376	0.028261414	null				Not found	9.89871	22.8103	-12.9115
Chr16:3507394-3516716	16	3507394	3516716	0.028261414	null				Not found	2.60541	15.5162	-12.9108
Chr15:136061444-136081836	15	136061444	136081836	0.028261414	null				Not found	8.00348	20.9123	-12.9088
Chr16:3158061-3173277	16	3158061	3173277	0.028261414	null				Not found	7.72985	20.6312	-12.9013
Chr12:184209-184926	12	184209	184926	0.028261414	null				Not found	22.4797	35.3753	-12.8956
Chr2:1210908-1212606	2	1210908	1212606	0.028261414	null				Not found	5.40045	18.2879	-12.8875
Chr1:89767847-89778962	1	89767847	89778962	0.028261414	null				Not found	4.03023	16.9168	-12.8866
Chr10:14709322-14716978	10	14709322	14716978	0.028261414	null				Not found	7.19268	20.0668	-12.8742
Chr6:8375030-8379340	6	8375030	8379340	0.028261414	null				Not found	9.11137	21.9814	-12.87
Chr10:75094817-75096478	10	75094817	75096478	0.028261414	null				Not found	11.4058	24.2745	-12.8687
Chr4:141943691-141949023	4	141943691	141949023	0.028261414	null				Not found	4.76258	17.6272	-12.8647
Chr4:114217817-114275950	4	114217817	114275950	0.028261414	null				Not found	6.58748	19.4469	-12.8595
Chr18:12619753-12625543	18	12619753	12625543	0.028261414	null				Not found	11.3175	24.1513	-12.8338
Chr17:68292937-68295662	17	68292937	68295662	0.028261414	null				Not found	5.48464	18.3177	-12.8331
Chr14:42549199-42555991	14	42549199	42555991	0.028261414	null				Not found	1.61203	14.444	-12.8319
Chr10:48453903-48463784	10	48453903	48463784	0.028261414	null				Not found	14.5116	27.3387	-12.8272
Chr6:105158965-105171175	6	105158965	105171175	0.028261414	null				Not found	12.85	25.659	-12.8089
Chr10:75090028-75091591	10	75090028	75091591	0.028261414	null				Not found	12.2932	25.1017	-12.8084
Chr14:81626241-81636827	14	81626241	81636827	0.032287464	null				Not found	7.23325	20.0348	-12.8015
Chr3:131097370-131103112	3	131097370	131103112	0.028261414	null				Not found	11.4126	24.1982	-12.7856
Chr1:186716577-186724482	1	186716577	186724482	0.04563136	null				Not found	18.5882	31.3617	-12.7735
Chr12:54620908-54624041	12	54620908	54624041	0.028261414	null				Not found	4.59465	17.3381	-12.7434
Chr7:46642336-46647248	7	46642336	46647248	0.028261414	null				Not found	7.52725	20.267	-12.7397
Chr9:876998-878436	9	876998	878436	0.028261414	null				Not found	24.114	36.8477	-12.7337
Chr14:142352016-142355630	14	142352016	142355630	0.028261414	null				Not found	6.21754	18.9464	-12.7288
Chr4:21375177-21382990	4	21375177	21382990	0.028261414	null				Not found	11.0717	23.798	-12.7263
Chr1:45428104-45437599	1	45428104	45437599	0.028261414	null				Not found	5.75273	18.4688	-12.7161
Chr14:75235275-75254951	14	75235275	75254951	0.028261414	null				Not found	9.30753	22.0135	-12.706
Chr17:45831610-45836492	17	45831610	45836492	0.028261414	null				Not found	9.01988	21.7232	-12.7033
Chr18:52710696-52721878	18	52710696	52721878	0.03166889	null				Not found	11.5733	24.2712	-12.698
Chr13:78145708-78150735	13	78145708	78150735	0.028261414	null				Not found	6.21926	18.8933	-12.6741
Chr10:6372732-6379929	10	6372732	6379929	0.028261414	null				Not found	10.8663	23.5319	-12.6656
Chr4:81678909-81686633	4	81678909	81686633	0.028261414	null				Not found	14.4577	27.1105	-12.6528
Chr3:3171945-3173721	3	3171945	3173721	0.03213113	null				Not found	9.83363	22.4864	-12.6528
Chr14:82813234-82821711	14	82813234	82821711	0.028261414	null				Not found	8.04876	20.6785	-12.6297
Chr16:30111173-30142179	16	30111173	30142179	0.029372055	null				Not found	9.00737	21.6277	-12.6203
Chr10:74600409-74601823	10	74600409	74601823	0.028261414	null				Not found	5.88804	18.4922	-12.6042
Chr12:34497413-34500958	12	34497413	34500958	0.028261414	null				Not found	13.6333	26.2309	-12.5976
Chr1:25584602-25667394	1	25584602	25667394	0.028261414	null				Not found	2.27121	14.8545	-12.5833
Chr6:155044687-155045763	6	155044687	155045763	0.028261414	null				Not found	16.4866	29.0682	-12.5815
Chr3:56417763-56425033	3	56417763	56425033	0.028261414	null				Not found	10.2094	22.7762	-12.5669
Chr2:46959105-46968910	2	46959105	46968910	0.028261414	null				Not found	17.4744	30.0377	-12.5634
Chr5:71457145-71460303	5	71457145	71460303	0.028261414	null				Not found	8.26936	20.8061	-12.5368
Chr7:93190514-93201947	7	93190514	93201947	0.028261414	null				Not found	6.67716	19.2061	-12.5289
Chr9:3518643-3587080	9	3518643	3587080	0.03380542	null				Not found	9.16281	21.6435	-12.4807
ChrX:6143961-6147113	X	6143961	6147113	0.028261414	null				Not found	4.85893	17.3256	-12.4667
Chr3:31809925-31812410	3	31809925	31812410	0.028261414	null				Not found	8.95924	21.4225	-12.4632
Chr3:103350750-103355410	3	103350750	103355410	0.028261414	null				Not found	13.5451	26.0059	-12.4608
Chr3:73849385-73859902	3	73849385	73859902	0.028261414	null				Not found	8.2498	20.7086	-12.4588
Chr1:279167039-279172142	1	279167039	279172142	0.028261414	null				Not found	6.20723	18.6583	-12.4511
Chr4:26303458-26317250	4	26303458	26317250	0.02921557	null				Not found	8.7998	21.249	-12.4492
Chr17:67041571-67045937	17	67041571	67045937	0.028261414	null				Not found	8.30273	20.7366	-12.4339
Chr15:17444024-17507639	15	17444024	17507639	0.028261414	null				Not found	9.99766	22.4263	-12.4287
Chr18:2336203-2338780	18	2336203	2338780	0.028261414	null				Not found	8.81305	21.2318	-12.4188
Chr3:9025163-9026977	3	9025163	9026977	0.041240163	null				Not found	8.68323	21.1019	-12.4187
ChrX:32295784-32311164	X	32295784	32311164	0.028261414	null				Not found	15.2796	27.694	-12.4144
Chr14:142299976-142305544	14	142299976	142305544	0.028261414	null				Not found	13.2458	25.6547	-12.4089
Chr8:4822657-4826339	8	4822657	4826339	0.028261414	null				Not found	7.78651	20.184	-12.3975
Chr11:16853275-16856420	11	16853275	16856420	0.028261414	null				Not found	9.47329	21.8695	-12.3962
Chr11:85163760-85165265	11	85163760	85165265	0.03205271	null				Not found	4.91594	17.26	-12.3441
Chr18:32135282-32148896	18	32135282	32148896	0.028261414	null				Not found	10.5507	22.8826	-12.3319
Chr11:20578734-20595914	11	20578734	20595914	0.028261414	null				Not found	7.92342	20.2448	-12.3214
Chr1:1631764-1633852	1	1631764	1633852	0.035790592	null				Not found	2.16606	14.4766	-12.3105
Chr1:6331909-6336083	1	6331909	6336083	0.028261414	null				Not found	12.2532	24.5541	-12.3008
Chr14:108467532-108476831	14	108467532	108476831	0.028261414	null				Not found	6.33185	18.6266	-12.2948
Chr18:60263569-60266062	18	60263569	60266062	0.028261414	null				Not found	5.3236	17.6103	-12.2867
Chr5:71500053-71503162	5	71500053	71503162	0.028261414	null				Not found	8.86993	21.1492	-12.2793
Chr8:44009041-44021374	8	44009041	44021374	0.028261414	null				Not found	12.0785	24.3573	-12.2788
Chr1:308580433-308581817	1	308580433	308581817	0.028261414	null				Not found	1.70722	13.9847	-12.2774
ChrX:14604006-14612714	X	14604006	14612714	0.042364657	null				Not found	8.38956	20.6592	-12.2696
Chr7:6885292-6893236	7	6885292	6893236	0.028261414	null				Not found	7.42208	19.6855	-12.2634
Chr7:3188372-3189875	7	3188372	3189875	0.034765895	null				Not found	15.7832	28.0429	-12.2597
Chr4:68390211-68397583	4	68390211	68397583	0.028261414	null				Not found	10.8152	23.0729	-12.2577
Chr13:133519647-133532501	13	133519647	133532501	0.028261414	null				Not found	6.72228	18.976	-12.2538
Chr7:10966661-10970455	7	10966661	10970455	0.028261414	null				Not found	7.55895	19.8084	-12.2494
Chr13:157020716-157043029	13	157020716	157043029	0.028261414	null				Not found	6.49326	18.7338	-12.2405
Chr3:10847928-10853513	3	10847928	10853513	0.028261414	null				Not found	22.1956	34.4279	-12.2324
Chr3:18875233-18928263	3	18875233	18928263	0.028261414	null				Not found	14.697	26.9221	-12.2251
Chr11:9569742-9579021	11	9569742	9579021	0.04151182	null				Not found	11.2429	23.463	-12.2201
Chr1:114362300-114383287	1	114362300	114383287	0.028261414	null				Not found	14.664	26.8823	-12.2183
Chr1:18900980-18915006	1	18900980	18915006	0.028261414	null				Not found	5.3942	17.6113	-12.2171
Chr7:6819282-6823629	7	6819282	6823629	0.028261414	null				Not found	2.655	14.8633	-12.2083
Chr6:156541518-156552586	6	156541518	156552586	0.028261414	null				Not found	11.9046	24.098	-12.1934
ChrX:63812845-63858185	X	63812845	63858185	0.028261414	null				Not found	6.36402	18.5499	-12.1859
Chr6:2668221-2669979	6	2668221	2669979	0.028261414	null				Not found	5.31362	17.4959	-12.1822
Chr2:28012444-28017086	2	28012444	28017086	0.028261414	null				Not found	12.4068	24.586	-12.1792
ChrX:30238114-30280859	X	30238114	30280859	0.037769113	null				Not found	5.65962	17.8381	-12.1785
Chr12:17741287-17744747	12	17741287	17744747	0.028261414	null				Not found	9.24524	21.3949	-12.1497
ChrX:140831909-140843775	X	140831909	140843775	0.028261414	null				Not found	7.69985	19.8357	-12.1359
Chr13:80764808-80769101	13	80764808	80769101	0.028261414	null				Not found	5.20642	17.3374	-12.131
Chr9:7396223-7401189	9	7396223	7401189	0.028261414	null				Not found	12.128	24.2565	-12.1285
ChrX:125519402-125522424	X	125519402	125522424	0.042121656	null				Not found	16.5217	28.6435	-12.1218
Chr9:11973497-11976602	9	11973497	11976602	0.048254315	null				Not found	10.629	22.7494	-12.1204
Chr3:141023838-141025465	3	141023838	141025465	0.028261414	null				Not found	10.9505	23.0691	-12.1187
Chr6:68405572-68411288	6	68405572	68411288	0.028261414	null				Not found	7.55111	19.6639	-12.1128
Chr17:40232528-40240920	17	40232528	40240920	0.028261414	null				Not found	5.61519	17.7167	-12.1016
Chr1:11322623-11329574	1	11322623	11329574	0.028261414	null				Not found	11.2554	23.3556	-12.1001
Chr8:56620645-56635480	8	56620645	56635480	0.028261414	null				Not found	19.6682	31.7236	-12.0554
Chr9:103248937-103261026	9	103248937	103261026	0.028901719	null				Not found	14.5729	26.6262	-12.0533
Chr14:151293450-151296436	14	151293450	151296436	0.028261414	null				Not found	7.21461	19.2622	-12.0476
Chr11:79814676-79826604	11	79814676	79826604	0.03033815	null				Not found	1.68597	13.7111	-12.0252
Chr9:52251591-52256091	9	52251591	52256091	0.028261414	null				Not found	9.73816	21.7627	-12.0246
Chr11:75617456-75619731	11	75617456	75619731	0.028261414	null				Not found	13.3444	25.3571	-12.0126
Chr5:110949539-110951854	5	110949539	110951854	0.028261414	null				Not found	5.95719	17.9582	-12.001
Chr6:151217685-151219927	6	151217685	151219927	0.028261414	null				Not found	3.82322	15.8167	-11.9935
Chr3:15320768-15326470	3	15320768	15326470	0.028261414	null				Not found	10.4385	22.4248	-11.9863
Chr7:104405558-104415580	7	104405558	104415580	0.03117391	null				Not found	2.9349	14.9207	-11.9858
Chr18:2656383-2658592	18	2656383	2658592	0.028261414	null				Not found	4.09107	16.0761	-11.985
Chr4:5952038-5955719	4	5952038	5955719	0.028261414	null				Not found	19.8441	31.8224	-11.9783
Chr15:53586463-53601163	15	53586463	53601163	0.028261414	null				Not found	5.03347	17.004	-11.9706
Chr13:13826013-13831611	13	13826013	13831611	0.039982755	null				Not found	7.21214	19.1734	-11.9613
Chr4:102973013-102982322	4	102973013	102982322	0.028261414	null				Not found	7.21674	19.1751	-11.9583
Chr17:19584577-19600201	17	19584577	19600201	0.028261414	null				Not found	9.16125	21.1092	-11.9479
Chr2:3792833-3794850	2	3792833	3794850	0.028261414	null				Not found	5.76227	17.6913	-11.9291
Chr17:65709050-65711847	17	65709050	65711847	0.028261414	null				Not found	5.62016	17.5363	-11.9161
Chr1:49905795-49915652	1	49905795	49915652	0.028261414	null				Not found	13.1618	25.0707	-11.9089
Chr5:70144008-70150837	5	70144008	70150837	0.028261414	null				Not found	9.56948	21.4726	-11.9031
Chr3:112505724-112523850	3	112505724	112523850	0.028261414	null				Not found	4.69768	16.5562	-11.8585
Chr14:47296102-47304303	14	47296102	47304303	0.028261414	null				Not found	15.6192	27.4771	-11.8579
Chr9:21769658-21780363	9	21769658	21780363	0.028261414	null				Not found	13.6676	25.5125	-11.8448
Chr8:26482035-26500850	8	26482035	26500850	0.03205777	null				Not found	7.64355	19.4784	-11.8349
Chr4:135265695-135268175	4	135265695	135268175	0.028261414	null				Not found	5.08901	16.9092	-11.8201
Chr2:42594139-42599412	2	42594139	42599412	0.028261414	null				Not found	7.63304	19.4506	-11.8175
Chr1:81279087-81295175	1	81279087	81295175	0.028261414	null				Not found	9.49758	21.2934	-11.7958
Chr8:3559448-3561531	8	3559448	3561531	0.028261414	null				Not found	17.8497	29.6322	-11.7826
Chr3:43674052-43680337	3	43674052	43680337	0.028261414	null				Not found	11.7002	23.4735	-11.7733
Chr6:146550960-146553931	6	146550960	146553931	0.028261414	null				Not found	4.49816	16.2484	-11.7503
Chr9:119942718-119960404	9	119942718	119960404	0.028261414	null				Not found	14.3121	26.055	-11.7429
Chr11:81023113-81025838	11	81023113	81025838	0.028261414	null				Not found	13.4725	25.2109	-11.7384
Chr8:48033385-48045442	8	48033385	48045442	0.028261414	null				Not found	13.8002	25.5135	-11.7133
Chr7:49269196-49281165	7	49269196	49281165	0.028261414	null				Not found	8.67732	20.3893	-11.7119
Chr16:48769830-48777136	16	48769830	48777136	0.028261414	null				Not found	17.0319	28.7415	-11.7097
Chr10:74699736-74703658	10	74699736	74703658	0.028261414	null				Not found	22.9588	34.6632	-11.7044
Chr17:55422676-55430310	17	55422676	55430310	0.028261414	null				Not found	5.55877	17.2554	-11.6967
Chr13:176320153-176374481	13	176320153	176374481	0.028261414	null				Not found	8.52786	20.2017	-11.6738
Chr3:36902819-36907028	3	36902819	36907028	0.028261414	null				Not found	5.95379	17.6255	-11.6717
Chr9:52861271-52864523	9	52861271	52864523	0.03262581	null				Not found	1.43495	13.1023	-11.6673
Chr14:1536158-1540872	14	1536158	1540872	0.028261414	null				Not found	15.2865	26.9511	-11.6646
Chr15:38407963-38420518	15	38407963	38420518	0.028261414	null				Not found	9.38852	21.0251	-11.6366
ChrX:28593191-28606029	X	28593191	28606029	0.028261414	null				Not found	13.7923	25.4263	-11.6339
Chr6:2138614-2143041	6	2138614	2143041	0.028261414	null				Not found	6.71466	18.3465	-11.6319
Chr7:124306711-124310667	7	124306711	124310667	0.028261414	null				Not found	9.94392	21.5751	-11.6311
Chr14:142592858-142595651	14	142592858	142595651	0.031674333	null				Not found	11.9081	23.5333	-11.6252
Chr15:135191061-135195116	15	135191061	135195116	0.028261414	null				Not found	7.22066	18.845	-11.6244
Chr11:54288874-54298480	11	54288874	54298480	0.035215463	null				Not found	13.2392	24.8635	-11.6243
Chr11:79705635-79713406	11	79705635	79713406	0.04369014	null				Not found	10.5766	22.1743	-11.5977
Chr6:49329482-49333329	6	49329482	49333329	0.028261414	null				Not found	0.6874	12.2829	-11.5955
Chr13:218549404-218550887	13	218549404	218550887	0.028261414	null				Not found	4.46754	16.0541	-11.5865
Chr9:14825056-14828130	9	14825056	14828130	0.028261414	null				Not found	2.06703	13.6426	-11.5756
Chr15:153714239-153715322	15	153714239	153715322	0.028261414	null				Not found	14.5428	26.1129	-11.5701
Chr6:86311036-86322901	6	86311036	86322901	0.028261414	null				Not found	10.3611	21.9193	-11.5582
Chr11:80450120-80456430	11	80450120	80456430	0.028261414	null				Not found	11.4918	23.0372	-11.5454
Chr7:89173761-89184613	7	89173761	89184613	0.028261414	null				Not found	5.89793	17.4416	-11.5437
Chr10:75083946-75085673	10	75083946	75085673	0.028261414	null				Not found	12.4036	23.9441	-11.5405
Chr7:91770326-91776715	7	91770326	91776715	0.028261414	null				Not found	10.8445	22.378	-11.5335
Chr1:205369860-205382697	1	205369860	205382697	0.028261414	null				Not found	15.2156	26.7354	-11.5198
Chr4:17728963-17748450	4	17728963	17748450	0.028261414	null				Not found	16.2506	27.7449	-11.4943
Chr3:117493742-117497518	3	117493742	117497518	0.028261414	null				Not found	2.93054	14.4201	-11.4896
Chr2:99677913-99771958	2	99677913	99771958	0.028261414	null				Not found	19.2336	30.7228	-11.4892
ChrX:13958628-13964159	X	13958628	13964159	0.028261414	null				Not found	13.2561	24.7378	-11.4817
Chr5:47965722-47975618	5	47965722	47975618	0.028261414	null				Not found	15.6381	27.1045	-11.4664
Chr6:1125061-1126313	6	1125061	1126313	0.028261414	null				Not found	6.65103	18.104	-11.453
ChrX:4060437-4063544	X	4060437	4063544	0.028261414	null				Not found	6.19474	17.6284	-11.4336
Chr9:46442211-46447346	9	46442211	46447346	0.028261414	null				Not found	3.78369	15.209	-11.4253
Chr7:123238244-123243248	7	123238244	123243248	0.028261414	null				Not found	7.18188	18.604	-11.4221
Chr1:231491494-231503291	1	231491494	231503291	0.044756185	null				Not found	16.1005	27.5081	-11.4075
Chr2:87372323-87377244	2	87372323	87377244	0.028261414	null				Not found	16.3228	27.7218	-11.3989
Chr7:66735425-66748874	7	66735425	66748874	0.028261414	null				Not found	11.9016	23.2983	-11.3967
Chr15:140114311-140122050	15	140114311	140122050	0.028261414	null				Not found	11.8805	23.2772	-11.3967
ChrX:104079406-104082630	X	104079406	104082630	0.028261414	null				Not found	9.52732	20.8962	-11.3689
Chr10:19666977-19670987	10	19666977	19670987	0.028261414	null				Not found	6.35712	17.7255	-11.3684
Chr4:136718072-136721233	4	136718072	136721233	0.028261414	null				Not found	3.74189	15.1085	-11.3666
Chr2:60925960-60930549	2	60925960	60930549	0.028261414	null				Not found	5.11091	16.4567	-11.3458
Chr11:7880044-7883522	11	7880044	7883522	0.028261414	null				Not found	10.972	22.3161	-11.3442
Chr17:68206150-68209807	17	68206150	68209807	0.028261414	null				Not found	2.45283	13.7885	-11.3357
Chr10:56833570-56842923	10	56833570	56842923	0.028261414	null				Not found	12.1667	23.477	-11.3103
Chr9:151701551-151705517	9	151701551	151705517	0.028261414	null				Not found	5.72983	17.0363	-11.3065
Chr12:39889666-39894060	12	39889666	39894060	0.028261414	null				Not found	8.7795	20.0722	-11.2927
Chr14:84295639-84302619	14	84295639	84302619	0.028261414	null				Not found	7.08774	18.3745	-11.2867
Chr13:4205072-4212841	13	4205072	4212841	0.028261414	null				Not found	11.1113	22.3911	-11.2798
Chr8:59196408-59205798	8	59196408	59205798	0.028261414	null				Not found	12.5728	23.8481	-11.2754
Chr14:64226235-64231743	14	64226235	64231743	0.028261414	null				Not found	8.80126	20.0742	-11.2729
Chr2:141628265-141634729	2	141628265	141634729	0.028261414	null				Not found	21.1064	32.3694	-11.263
Chr15:154542097-154543457	15	154542097	154543457	0.03017555	null				Not found	8.01463	19.2728	-11.2582
Chr1:13390057-13406743	1	13390057	13406743	0.028261414	null				Not found	7.97386	19.2202	-11.2464
Chr10:74928583-74929903	10	74928583	74929903	0.028261414	null				Not found	24.3723	35.6164	-11.2441
Chr11:85682947-85684465	11	85682947	85684465	0.028261414	null				Not found	5.86176	17.0993	-11.2375
Chr4:3019513-3021934	4	3019513	3021934	0.028261414	null				Not found	14.7301	25.9601	-11.23
Chr5:34678055-34682801	5	34678055	34682801	0.028261414	null				Not found	8.82353	20.0395	-11.2159
Chr2:142378552-142381688	2	142378552	142381688	0.028261414	null				Not found	10.8771	22.091	-11.2139
Chr3:36212408-36218677	3	36212408	36218677	0.028261414	null				Not found	13.1219	24.3333	-11.2114
ChrX:121414276-121422254	X	121414276	121422254	0.028261414	null				Not found	8.44773	19.6471	-11.1993
Chr6:118638322-118667449	6	118638322	118667449	0.028261414	null				Not found	20.7094	31.896	-11.1866
Chr6:30496553-30499591	6	30496553	30499591	0.03012074	null				Not found	2.47738	13.6576	-11.1802
Chr4:92129259-92140362	4	92129259	92140362	0.028261414	null				Not found	10.1011	21.2779	-11.1768
Chr17:14043283-14046422	17	14043283	14046422	0.02860034	null				Not found	6.3138	17.4864	-11.1726
Chr13:74188517-74200354	13	74188517	74200354	0.028261414	null				Not found	6.78983	17.9621	-11.1723
Chr1:182729992-182742736	1	182729992	182742736	0.028261414	null				Not found	11.3019	22.4677	-11.1658
Chr3:62531753-62534074	3	62531753	62534074	0.028261414	null				Not found	1.99391	13.1332	-11.1393
Chr16:6560945-6566100	16	6560945	6566100	0.028261414	null				Not found	7.26259	18.4009	-11.1383
Chr2:157048747-157051478	2	157048747	157051478	0.028261414	null				Not found	6.19571	17.3251	-11.1294
Chr5:7245173-7247302	5	7245173	7247302	0.028261414	null				Not found	7.26653	18.3901	-11.1236
Chr14:124574896-124583003	14	124574896	124583003	0.028261414	null				Not found	18.7673	29.8741	-11.1068
Chr8:147584661-147590309	8	147584661	147590309	0.028261414	null				Not found	9.96838	21.0711	-11.1027
Chr15:94002891-94017197	15	94002891	94017197	0.028261414	null				Not found	10.9622	22.0614	-11.0992
Chr6:80511389-80521205	6	80511389	80521205	0.028261414	null				Not found	17.7601	28.8474	-11.0873
Chr7:988561-990587	7	988561	990587	0.028261414	null				Not found	5.15336	16.2356	-11.0823
Chr3:1204005-1206507	3	1204005	1206507	0.034621384	null				Not found	9.21993	20.2873	-11.0674
Chr7:14395245-14411463	7	14395245	14411463	0.028261414	null				Not found	4.92357	15.9904	-11.0669
Chr6:87447378-87454519	6	87447378	87454519	0.028261414	null				Not found	9.05974	20.1146	-11.0548
Chr11:85070107-85071354	11	85070107	85071354	0.028261414	null				Not found	7.99386	19.0461	-11.0522
Chr14:38986037-38994326	14	38986037	38994326	0.028261414	null				Not found	15.9278	26.9721	-11.0443
Chr4:24427255-24444483	4	24427255	24444483	0.028261414	null				Not found	4.82341	15.8576	-11.0342
Chr9:2557256-2559511	9	2557256	2559511	0.028261414	null				Not found	11.1867	22.208	-11.0212
Chr8:13730306-13741156	8	13730306	13741156	0.028261414	null				Not found	3.87272	14.8856	-11.0129
ChrX:17792283-17808140	X	17792283	17808140	0.028261414	null				Not found	7.75985	18.7666	-11.0068
Chr12:47487883-47494867	12	47487883	47494867	0.028261414	null				Not found	2.77837	13.7834	-11.005
Chr11:1703366-1705971	11	1703366	1705971	0.028261414	null				Not found	0.389306	11.3891	-10.9998
Chr13:81455261-81468483	13	81455261	81468483	0.042597137	null				Not found	17.803	28.8024	-10.9994
Chr13:86394321-86406818	13	86394321	86406818	0.035684545	null				Not found	13.9584	24.9412	-10.9827
Chr11:54854661-54862616	11	54854661	54862616	0.028261414	null				Not found	11.8658	22.8472	-10.9814
Chr3:21356304-21360827	3	21356304	21360827	0.028261414	null				Not found	3.43588	14.4166	-10.9807
Chr1:186746185-186757569	1	186746185	186757569	0.03251103	null				Not found	10.0641	21.0234	-10.9592
Chr17:50984006-50996498	17	50984006	50996498	0.029866798	null				Not found	18.193	29.1411	-10.9481
Chr5:102174720-102190446	5	102174720	102190446	0.028261414	null				Not found	9.6071	20.5535	-10.9464
Chr3:140752300-140753827	3	140752300	140753827	0.028261414	null				Not found	1.10162	12.0215	-10.9198
Chr8:9770762-9784358	8	9770762	9784358	0.028261414	null				Not found	13.5648	24.4807	-10.9159
Chr1:130742926-130754440	1	130742926	130754440	0.028261414	null				Not found	6.31303	17.2209	-10.9079
Chr13:216977589-216979289	13	216977589	216979289	0.028261414	null				Not found	3.29102	14.1958	-10.9048
Chr6:114833998-114850063	6	114833998	114850063	0.028261414	null				Not found	8.89566	19.7826	-10.8869
Chr13:129194767-129207066	13	129194767	129207066	0.028261414	null				Not found	8.14721	19.0285	-10.8813
Chr3:101491085-101501308	3	101491085	101501308	0.028261414	null				Not found	6.58568	17.4597	-10.874
Chr1:7826981-7833966	1	7826981	7833966	0.028261414	null				Not found	7.52474	18.3956	-10.8708
Chr2:147347600-147350588	2	147347600	147350588	0.028261414	null				Not found	9.75473	20.6153	-10.8606
Chr1:259060930-259079407	1	259060930	259079407	0.028261414	null				Not found	10.195	21.0336	-10.8386
Chr1:12210830-12214735	1	12210830	12214735	0.028261414	null				Not found	18.2356	29.049	-10.8133
Chr7:95459732-95465192	7	95459732	95465192	0.028261414	null				Not found	12.1971	22.9874	-10.7903
Chr10:2806176-2812147	10	2806176	2812147	0.04035944	null				Not found	13.1447	23.9252	-10.7805
Chr8:145910805-145912601	8	145910805	145912601	0.028261414	null				Not found	1.4528	12.2247	-10.7719
Chr8:64846967-64855826	8	64846967	64855826	0.028261414	null				Not found	7.54072	18.3053	-10.7646
Chr17:66813139-66818481	17	66813139	66818481	0.028261414	null				Not found	9.54157	20.2972	-10.7557
Chr14:142338793-142343717	14	142338793	142343717	0.028261414	null				Not found	9.33715	20.0916	-10.7545
Chr11:84917102-84918359	11	84917102	84918359	0.028261414	null				Not found	10.1178	20.871	-10.7532
Chr9:640324-642746	9	640324	642746	0.028261414	null				Not found	11.8387	22.5592	-10.7206
Chr5:74112992-74123632	5	74112992	74123632	0.028261414	null				Not found	5.7826	16.4843	-10.7017
Chr1:28224716-28238172	1	28224716	28238172	0.028261414	null				Not found	20.8796	31.5791	-10.6995
Chr6:52123599-52130803	6	52123599	52130803	0.028261414	null				Not found	19.004	29.6728	-10.6688
Chr8:84206833-84220724	8	84206833	84220724	0.028261414	null				Not found	8.45212	19.119	-10.6669
Chr11:927985-929436	11	927985	929436	0.028261414	null				Not found	11.7249	22.3862	-10.6613
Chr5:33169786-33181159	5	33169786	33181159	0.028261414	null				Not found	10.7096	21.3674	-10.6578
Chr6:28013941-28019882	6	28013941	28019882	0.028261414	null				Not found	4.2202	14.8598	-10.6396
Chr6:15175350-15177938	6	15175350	15177938	0.028261414	null				Not found	14.7476	25.3856	-10.6379
Chr1:269862709-269874705	1	269862709	269874705	0.033232503	null				Not found	9.89276	20.5275	-10.6347
Chr2:1294948-1296664	2	1294948	1296664	0.028261414	null				Not found	15.2165	25.821	-10.6045
Chr13:99724903-99732756	13	99724903	99732756	0.028261414	null				Not found	2.07218	12.666	-10.5939
Chr13:80237342-80291818	13	80237342	80291818	0.028261414	null				Not found	15.151	25.7425	-10.5915
Chr14:8735353-8743078	14	8735353	8743078	0.028261414	null				Not found	9.62098	20.2108	-10.5898
Chr6:6542396-6554021	6	6542396	6554021	0.028261414	null				Not found	16.1463	26.7277	-10.5814
Chr5:756204-757994	5	756204	757994	0.028261414	null				Not found	5.09687	15.6523	-10.5554
Chr7:2540804-2543010	7	2540804	2543010	0.028261414	null				Not found	4.07317	14.6164	-10.5432
Chr3:106751796-106775266	3	106751796	106775266	0.028261414	null				Not found	11.7409	22.2691	-10.5282
Chr4:3868071-3871096	4	3868071	3871096	0.028261414	null				Not found	5.24941	15.7768	-10.5273
Chr6:151127594-151129568	6	151127594	151129568	0.028261414	null				Not found	3.72379	14.2488	-10.525
Chr10:74000255-74003196	10	74000255	74003196	0.028261414	null				Not found	5.26367	15.7851	-10.5215
Chr8:26765941-26788983	8	26765941	26788983	0.028261414	null				Not found	16.152	26.6689	-10.5169
Chr1:182373971-182379625	1	182373971	182379625	0.028261414	null				Not found	8.97627	19.4642	-10.488
Chr10:69291182-69292892	10	69291182	69292892	0.028261414	null				Not found	7.83118	18.3125	-10.4813
Chr17:68564008-68566162	17	68564008	68566162	0.028261414	null				Not found	9.47445	19.9542	-10.4798
Chr1:68450430-68468770	1	68450430	68468770	0.028261414	null				Not found	5.43469	15.8963	-10.4616
Chr3:140136264-140142241	3	140136264	140142241	0.028261414	null				Not found	3.75704	14.2129	-10.4558
Chr14:25122669-25127562	14	25122669	25127562	0.028261414	null				Not found	2.65567	13.1075	-10.4518
Chr1:80168743-80180614	1	80168743	80180614	0.028261414	null				Not found	7.67265	18.1192	-10.4465
Chr6:30371647-30373447	6	30371647	30373447	0.028261414	null				Not found	8.75915	19.2009	-10.4418
ChrX:15995801-16003109	X	15995801	16003109	0.028261414	null				Not found	6.10336	16.5325	-10.4292
Chr17:27884238-27897589	17	27884238	27897589	0.028261414	null				Not found	8.13762	18.56	-10.4224
Chr18:1174236-1183515	18	1174236	1183515	0.039064158	null				Not found	9.50121	19.9227	-10.4215
Chr1:75601793-75610806	1	75601793	75610806	0.028261414	null				Not found	10.5686	20.9782	-10.4096
Chr5:26617354-26632267	5	26617354	26632267	0.028261414	null				Not found	16.2647	26.6675	-10.4028
Chr12:32200421-32213432	12	32200421	32213432	0.028261414	null				Not found	7.20832	17.579	-10.3707
Chr2:156584495-156588978	2	156584495	156588978	0.028261414	null				Not found	10.4079	20.7767	-10.3688
Chr10:64808811-64811402	10	64808811	64811402	0.028261414	null				Not found	17.0305	27.3978	-10.3674
Chr8:127854956-127866557	8	127854956	127866557	0.028261414	null				Not found	9.75266	20.1054	-10.3528
Chr11:83780559-83785909	11	83780559	83785909	0.028261414	null				Not found	6.50951	16.853	-10.3435
Chr10:72563609-72567288	10	72563609	72567288	0.028261414	null				Not found	3.512	13.8519	-10.3399
Chr17:42993054-42998810	17	42993054	42998810	0.028261414	null				Not found	11.9598	22.2753	-10.3156
Chr10:48390893-48396875	10	48390893	48396875	0.028261414	null				Not found	8.76361	19.0786	-10.315
Chr15:22343748-22354316	15	22343748	22354316	0.028261414	null				Not found	13.9557	24.2498	-10.2942
Chr13:80799910-80803793	13	80799910	80803793	0.028261414	null				Not found	9.34488	19.6359	-10.2911
Chr15:153721636-153723415	15	153721636	153723415	0.028261414	null				Not found	11.3596	21.6421	-10.2825
Chr17:11103049-11110711	17	11103049	11110711	0.028261414	null				Not found	9.45634	19.7062	-10.2499
Chr14:105671608-105689195	14	105671608	105689195	0.028261414	null				Not found	6.5934	16.8348	-10.2414
Chr4:82010642-82015400	4	82010642	82015400	0.029379666	null				Not found	6.37903	16.6149	-10.2359
Chr6:84488563-84496427	6	84488563	84496427	0.028261414	null				Not found	5.6928	15.926	-10.2332
Chr9:14828138-14830568	9	14828138	14830568	0.028261414	null				Not found	6.09017	16.3227	-10.2325
Chr7:94664225-94672167	7	94664225	94672167	0.029482415	null				Not found	2.03327	12.2653	-10.2321
Chr6:73485529-73513147	6	73485529	73513147	0.028261414	null				Not found	6.80049	17.0224	-10.2219
Chr13:215870416-215873328	13	215870416	215873328	0.028261414	null				Not found	2.13696	12.3562	-10.2192
Chr9:12040769-12043177	9	12040769	12043177	0.028261414	null				Not found	21.2803	31.457	-10.1767
Chr7:60415135-60421406	7	60415135	60421406	0.028261414	null				Not found	6.08122	16.2378	-10.1566
Chr11:23164617-23169136	11	23164617	23169136	0.028261414	null				Not found	6.64853	16.802	-10.1535
Chr6:84379460-84385454	6	84379460	84385454	0.028261414	null				Not found	7.04822	17.1909	-10.1427
Chr6:6440703-6521247	6	6440703	6521247	0.028261414	null				Not found	9.9543	20.0734	-10.1191
Chr11:80824001-80835710	11	80824001	80835710	0.028261414	null				Not found	13.2995	23.418	-10.1186
Chr9:112047732-112062208	9	112047732	112062208	0.028261414	null				Not found	7.78558	17.903	-10.1174
Chr6:6256896-6263022	6	6256896	6263022	0.028261414	null				Not found	12.7539	22.8704	-10.1165
Chr11:2365186-2368552	11	2365186	2368552	0.028261414	null				Not found	6.95635	17.0653	-10.109
Chr11:78871071-78875769	11	78871071	78875769	0.028261414	null				Not found	9.45532	19.5599	-10.1046
Chr14:27515808-27524532	14	27515808	27524532	0.028261414	null				Not found	8.07254	18.1761	-10.1036
Chr9:10053330-10055698	9	10053330	10055698	0.028261414	null				Not found	6.51817	16.6139	-10.0957
Chr12:12782233-12786450	12	12782233	12786450	0.028261414	null				Not found	6.73633	16.8308	-10.0944
Chr17:65792643-65794432	17	65792643	65794432	0.028261414	null				Not found	8.96849	19.0446	-10.0761
Chr6:114168352-114173604	6	114168352	114173604	0.032021612	null				Not found	5.1208	15.1698	-10.049
Chr10:39659038-39678917	10	39659038	39678917	0.028261414	null				Not found	8.54965	18.5779	-10.0283
Chr13:207658206-207667870	13	207658206	207667870	0.044413	null				Not found	13.7717	23.7978	-10.0261
Chr1:230200028-230206141	1	230200028	230206141	0.028261414	null				Not found	10.3073	20.3119	-10.0047
Chr3:100652948-100662923	3	100652948	100662923	0.028261414	null				Not found	6.94182	16.9248	-9.98293
Chr7:16244166-16255529	7	16244166	16255529	0.030834325	null				Not found	8.58018	18.5603	-9.9801
Chr13:38277185-38285390	13	38277185	38285390	0.028261414	null				Not found	14.6046	24.5592	-9.95464
Chr13:118789918-118797792	13	118789918	118797792	0.028261414	null				Not found	6.44929	16.3832	-9.93393
Chr1:152960307-152966150	1	152960307	152966150	0.028261414	null				Not found	11.6667	21.5838	-9.91709
Chr1:172119827-172138143	1	172119827	172138143	0.028261414	null				Not found	9.61999	19.5279	-9.90787
ChrX:131102382-131108710	X	131102382	131108710	0.028261414	null				Not found	4.6655	14.5609	-9.89544
Chr15:34399027-34407767	15	34399027	34407767	0.028261414	null				Not found	7.58145	17.4737	-9.89228
Chr9:66471638-66477814	9	66471638	66477814	0.028261414	null				Not found	5.85658	15.7438	-9.88725
Chr1:282824683-282833778	1	282824683	282833778	0.03320987	null				Not found	7.18997	17.0745	-9.88455
Chr8:90539970-90554940	8	90539970	90554940	0.028261414	null				Not found	5.5497	15.4331	-9.88338
ChrX:138154600-138163732	X	138154600	138163732	0.028261414	null				Not found	11.3785	21.2578	-9.87929
Chr11:72518238-72530717	11	72518238	72530717	0.028261414	null				Not found	4.14869	14.0175	-9.86878
Chr1:309266259-309278754	1	309266259	309278754	0.028261414	null				Not found	11.1316	20.959	-9.82737
Chr4:22717082-22724907	4	22717082	22724907	0.028261414	null				Not found	12.5322	22.3444	-9.81217
Chr8:11818814-11828920	8	11818814	11828920	0.028261414	null				Not found	2.35919	12.1594	-9.80019
Chr10:70326597-70332644	10	70326597	70332644	0.028261414	null				Not found	12.8146	22.6001	-9.78555
Chr2:1108296-1113353	2	1108296	1113353	0.028261414	null				Not found	6.37963	16.1647	-9.78504
Chr3:126661632-126665556	3	126661632	126665556	0.028261414	null				Not found	3.663	13.4324	-9.7694
Chr1:229037930-229051816	1	229037930	229051816	0.028261414	null				Not found	7.70912	17.4736	-9.76452
Chr1:156729375-156741613	1	156729375	156741613	0.028261414	null				Not found	14.917	24.6814	-9.76447
Chr9:95778656-95803021	9	95778656	95803021	0.028261414	null				Not found	15.4679	25.2224	-9.75448
Chr14:85364598-85377247	14	85364598	85377247	0.032544233	null				Not found	6.29258	16.0153	-9.72269
Chr15:21195034-21204669	15	21195034	21204669	0.028261414	null				Not found	11.6975	21.4202	-9.72269
ChrX:234636-244096	X	234636	244096	0.028261414	null				Not found	12.0716	21.7812	-9.70956
ChrX:129033789-129129244	X	129033789	129129244	0.028261414	null				Not found	16.5304	26.2379	-9.70756
Chr8:6307706-6321944	8	6307706	6321944	0.028261414	null				Not found	6.73347	16.4376	-9.70413
Chr6:18085913-18093867	6	18085913	18093867	0.028261414	null				Not found	3.04964	12.7374	-9.68772
Chr11:83315211-83320029	11	83315211	83320029	0.028261414	null				Not found	7.00824	16.6915	-9.68326
Chr10:3781242-3788508	10	3781242	3788508	0.028261414	null				Not found	16.1394	25.7997	-9.66031
Chr11:74262523-74267204	11	74262523	74267204	0.03071856	null				Not found	5.82601	15.481	-9.65495
Chr18:3818897-3821081	18	3818897	3821081	0.028261414	null				Not found	16.3071	25.958	-9.65097
Chr6:156783285-156785545	6	156783285	156785545	0.028261414	null				Not found	7.09785	16.7395	-9.64161
Chr10:62450888-62509935	10	62450888	62509935	0.028261414	null				Not found	8.50823	18.1442	-9.63593
Chr5:111231105-111232721	5	111231105	111232721	0.028261414	null				Not found	3.5431	13.179	-9.63587
Chr3:2688395-2692122	3	2688395	2692122	0.028261414	null				Not found	8.73463	18.3503	-9.61565
Chr4:86353092-86357550	4	86353092	86357550	0.028261414	null				Not found	4.33682	13.9323	-9.5955
Chr7:98697656-98701505	7	98697656	98701505	0.028261414	null				Not found	2.61534	12.196	-9.58063
Chr3:12385594-12393102	3	12385594	12393102	0.037769113	null				Not found	14.6414	24.1945	-9.55315
Chr12:23214015-23220225	12	23214015	23220225	0.028261414	null				Not found	8.61835	18.1582	-9.53983
Chr7:11464494-11467255	7	11464494	11467255	0.028261414	null				Not found	16.437	25.9722	-9.53514
Chr2:151788472-151799900	2	151788472	151799900	0.028261414	null				Not found	10.7221	20.2546	-9.53245
Chr18:8841749-8844665	18	8841749	8844665	0.028261414	null				Not found	6.80917	16.3225	-9.51328
Chr8:4638844-4640800	8	4638844	4640800	0.028261414	null				Not found	1.52114	11.013	-9.49184
Chr1:196887028-196910676	1	196887028	196910676	0.028261414	null				Not found	6.35473	15.7882	-9.43351
Chr3:126557577-126563630	3	126557577	126563630	0.028261414	null				Not found	13.0952	22.5174	-9.42218
Chr6:99722244-99725745	6	99722244	99725745	0.028261414	null				Not found	11.9792	21.3918	-9.41258
Chr7:126239899-126249023	7	126239899	126249023	0.028261414	null				Not found	10.0806	19.4918	-9.41112
Chr4:130485447-130493862	4	130485447	130493862	0.029157072	null				Not found	5.40868	14.8141	-9.40537
Chr10:51870910-51877668	10	51870910	51877668	0.028261414	null				Not found	6.42237	15.8217	-9.39928
Chr12:3013258-3015993	12	3013258	3015993	0.028261414	null				Not found	2.82249	12.2191	-9.39664
Chr18:55179645-55183039	18	55179645	55183039	0.028261414	null				Not found	9.29841	18.6883	-9.38994
Chr1:163560045-163561585	1	163560045	163561585	0.028261414	null				Not found	3.77223	13.1538	-9.38157
Chr18:36162907-36177044	18	36162907	36177044	0.028261414	null				Not found	10.8976	20.2777	-9.38016
Chr1:305974869-305978138	1	305974869	305978138	0.028261414	null				Not found	2.89909	12.2692	-9.37013
Chr15:153779994-153781014	15	153779994	153781014	0.028261414	null				Not found	8.33953	17.7028	-9.36325
Chr17:22571029-22583310	17	22571029	22583310	0.028261414	null				Not found	12.2502	21.6117	-9.36146
Chr6:114766708-114833997	6	114766708	114833997	0.028261414	null				Not found	10.8305	20.186	-9.3555
Chr6:2696350-2698587	6	2696350	2698587	0.028261414	null				Not found	4.92169	14.2678	-9.34607
Chr14:3241136-3248405	14	3241136	3248405	0.028261414	null				Not found	7.32672	16.6673	-9.3406
Chr7:121080520-121083444	7	121080520	121083444	0.028261414	null				Not found	9.76021	19.0971	-9.33689
Chr16:22757785-22764606	16	22757785	22764606	0.028261414	null				Not found	7.55441	16.8519	-9.2975
Chr14:151364018-151366213	14	151364018	151366213	0.028261414	null				Not found	2.20117	11.4944	-9.29326
Chr14:92610962-92627747	14	92610962	92627747	0.028261414	null				Not found	7.17402	16.4656	-9.29157
Chr11:10626352-10636090	11	10626352	10636090	0.028261414	null				Not found	6.3433	15.6007	-9.25741
Chr2:150260319-150264358	2	150260319	150264358	0.028261414	null				Not found	13.9733	23.1508	-9.17754
Chr5:71349473-71353391	5	71349473	71353391	0.028261414	null				Not found	13.9951	23.146	-9.15089
Chr3:52830937-52845421	3	52830937	52845421	0.028261414	null				Not found	4.01821	13.1645	-9.14625
Chr14:37314859-37322769	14	37314859	37322769	0.028261414	null				Not found	19.6995	28.8344	-9.13486
Chr14:86242878-86252344	14	86242878	86252344	0.028261414	null				Not found	10.3253	19.4375	-9.11224
Chr9:135805136-135815549	9	135805136	135815549	0.028261414	null				Not found	10.5311	19.6413	-9.11026
Chr1:215034499-215051869	1	215034499	215051869	0.028261414	null				Not found	16.0806	25.1317	-9.05115
Chr4:1177977-1179662	4	1177977	1179662	0.028261414	null				Not found	6.25987	15.2939	-9.03403
Chr12:8654871-8656967	12	8654871	8656967	0.028261414	null				Not found	6.8354	15.8567	-9.0213
Chr4:68611373-68617035	4	68611373	68617035	0.028261414	null				Not found	5.64074	14.6576	-9.01681
Chr1:96065748-96084985	1	96065748	96084985	0.028261414	null				Not found	13.7666	22.7739	-9.00739
Chr13:56721770-56734023	13	56721770	56734023	0.028261414	null				Not found	11.0427	20.0489	-9.00621
Chr9:46612125-46616634	9	46612125	46616634	0.028261414	null				Not found	10.8589	19.8438	-8.9849
Chr6:58674579-58676340	6	58674579	58676340	0.028261414	null				Not found	7.21246	16.1879	-8.97539
Chr13:161872557-161887712	13	161872557	161887712	0.028261414	null				Not found	4.72998	13.7029	-8.97294
Chr12:8633861-8636414	12	8633861	8636414	0.028261414	null				Not found	3.85632	12.8177	-8.96135
Chr13:218307212-218309102	13	218307212	218309102	0.028261414	null				Not found	7.53932	16.4987	-8.95941
Chr13:140358341-140364040	13	140358341	140364040	0.028261414	null				Not found	6.83058	15.7807	-8.95014
Chr6:31372220-31375399	6	31372220	31375399	0.028261414	null				Not found	0.453461	9.37497	-8.92151
Chr3:125810100-125815360	3	125810100	125815360	0.028261414	null				Not found	13.9414	22.8142	-8.87276
Chr3:3543030-3544487	3	3543030	3544487	0.028261414	null				Not found	15.2787	24.1418	-8.86312
Chr1:6307902-6315511	1	6307902	6315511	0.028261414	null				Not found	14.5765	23.4223	-8.84582
Chr15:21090652-21106748	15	21090652	21106748	0.028261414	null				Not found	11.3182	20.1437	-8.82542
Chr1:163645136-163647588	1	163645136	163647588	0.028261414	null				Not found	2.24818	11.0714	-8.82327
Chr7:81895607-81902988	7	81895607	81902988	0.028261414	null				Not found	4.57179	13.3913	-8.81949
Chr11:33853021-33871794	11	33853021	33871794	0.028261414	null				Not found	4.09495	12.9092	-8.81426
Chr1:13833812-13839268	1	13833812	13839268	0.037619192	null				Not found	7.31414	16.1261	-8.81197
Chr4:7857966-7864185	4	7857966	7864185	0.028261414	null				Not found	7.27761	16.0855	-8.80793
Chr15:25385048-25400542	15	25385048	25400542	0.028261414	null				Not found	14.8083	23.6086	-8.80029
Chr2:46694267-46709142	2	46694267	46709142	0.028261414	null				Not found	10.4149	19.1961	-8.78126
Chr8:141191189-141194570	8	141191189	141194570	0.028261414	null				Not found	21.2932	30.0547	-8.76151
Chr1:256304915-256317698	1	256304915	256317698	0.028261414	null				Not found	11.9538	20.7069	-8.75316
Chr6:34505914-34516836	6	34505914	34516836	0.028261414	null				Not found	9.77326	18.5167	-8.74348
Chr10:8233463-8238568	10	8233463	8238568	0.028261414	null				Not found	10.2419	18.9746	-8.73265
Chr7:20898548-20909325	7	20898548	20909325	0.028261414	null				Not found	12.303	21.0306	-8.72757
Chr8:90195487-90210554	8	90195487	90210554	0.028261414	null				Not found	9.33452	18.0215	-8.68695
Chr14:147542201-147547156	14	147542201	147547156	0.028261414	null				Not found	4.90844	13.5729	-8.66447
Chr3:133520552-133524598	3	133520552	133524598	0.028261414	null				Not found	4.30874	12.9482	-8.63943
Chr10:49796165-49800995	10	49796165	49800995	0.028261414	null				Not found	3.54995	12.142	-8.59204
Chr9:48680823-48685734	9	48680823	48685734	0.028261414	null				Not found	6.39624	14.977	-8.58071
Chr2:55877456-55895726	2	55877456	55895726	0.028261414	null				Not found	22.5965	31.1703	-8.57378
Chr8:6242568-6247400	8	6242568	6247400	0.028261414	null				Not found	4.25115	12.8102	-8.55908
Chr17:10327205-10386930	17	10327205	10386930	0.028261414	null				Not found	6.95037	15.4951	-8.54471
Chr1:122781778-122788750	1	122781778	122788750	0.03380542	null				Not found	7.33561	15.8496	-8.51403
Chr2:18525257-18529436	2	18525257	18529436	0.028261414	null				Not found	3.64177	12.1537	-8.51191
Chr3:141949681-141951002	3	141949681	141951002	0.028261414	null				Not found	5.00649	13.4826	-8.47607
Chr7:100930686-100940067	7	100930686	100940067	0.028261414	null				Not found	17.0363	25.4862	-8.44982
Chr17:54850227-54854875	17	54850227	54854875	0.028261414	null				Not found	14.102	22.5035	-8.40149
Chr13:81705595-81721596	13	81705595	81721596	0.028261414	null				Not found	12.3036	20.6905	-8.38691
Chr9:10626552-10630152	9	10626552	10630152	0.028261414	null				Not found	12.9121	21.295	-8.38281
Chr9:52804782-52809685	9	52804782	52809685	0.028261414	null				Not found	2.51548	10.8851	-8.3696
Chr12:718342-722948	12	718342	722948	0.028261414	null				Not found	6.51007	14.8474	-8.3373
Chr17:47902151-47909149	17	47902151	47909149	0.028261414	null				Not found	8.48021	16.8028	-8.32258
Chr9:152449610-152452503	9	152449610	152452503	0.028261414	null				Not found	5.75493	14.0693	-8.3144
Chr3:36284405-36288157	3	36284405	36288157	0.028261414	null				Not found	5.64587	13.9461	-8.30028
Chr1:16289-21664	1	16289	21664	0.028261414	null				Not found	11.4637	19.7542	-8.29047
Chr10:60473024-60482820	10	60473024	60482820	0.028261414	null				Not found	3.15844	11.4132	-8.25478
Chr6:68430130-68434398	6	68430130	68434398	0.028261414	null				Not found	9.92846	18.1365	-8.20805
Chr17:16598676-16604849	17	16598676	16604849	0.028261414	null				Not found	7.27614	15.4448	-8.16864
Chr1:311698915-311701995	1	311698915	311701995	0.03071856	null				Not found	3.30488	11.4524	-8.1475
Chr14:2784700-2794146	14	2784700	2794146	0.028261414	null				Not found	6.0531	14.1507	-8.09765
Chr17:48444816-48452379	17	48444816	48452379	0.028261414	null				Not found	5.49052	13.5263	-8.03581
Chr8:148037205-148043690	8	148037205	148043690	0.028261414	null				Not found	7.05788	15.0376	-7.9797
Chr4:86167838-86177692	4	86167838	86177692	0.028261414	null				Not found	8.29777	16.2701	-7.9723
Chr1:307528062-307530153	1	307528062	307530153	0.028261414	null				Not found	5.68409	13.6383	-7.95416
Chr14:43892746-43897837	14	43892746	43897837	0.028261414	null				Not found	5.77634	13.6611	-7.88481
Chr11:16391787-16394248	11	16391787	16394248	0.028261414	null				Not found	17.1375	24.9811	-7.84354
Chr1:253130528-253152479	1	253130528	253152479	0.028261414	null				Not found	13.5578	21.4006	-7.84286
Chr3:14756810-14759388	3	14756810	14759388	0.028261414	null				Not found	0.233186	7.99756	-7.76437
Chr4:91923894-91936557	4	91923894	91936557	0.028261414	null				Not found	7.96802	15.7182	-7.75022
Chr16:34805082-34816073	16	34805082	34816073	0.028261414	null				Not found	7.67141	15.4037	-7.73233
Chr9:1335702-1337991	9	1335702	1337991	0.028261414	null				Not found	2.89979	10.6218	-7.72196
Chr6:138396244-138457775	6	138396244	138457775	0.028261414	null				Not found	14.0689	21.7626	-7.69371
Chr14:26393988-26401563	14	26393988	26401563	0.028261414	null				Not found	2.66043	10.2879	-7.62751
Chr9:132558172-132566342	9	132558172	132566342	0.028261414	null				Not found	9.68391	17.2886	-7.60466
Chr16:37915852-37929065	16	37915852	37929065	0.028261414	null				Not found	12.5069	20.1014	-7.59451
Chr13:186085170-186106597	13	186085170	186106597	0.028261414	null				Not found	11.1198	18.5409	-7.42109
Chr8:117772224-117783433	8	117772224	117783433	0.028261414	null				Not found	8.73541	16.1385	-7.40309
Chr14:98204164-98209615	14	98204164	98209615	0.028261414	null				Not found	0.393798	7.7468	-7.353
Chr7:6178147-6182120	7	6178147	6182120	0.028261414	null				Not found	3.94772	11.297	-7.3493
Chr4:105633229-105642589	4	105633229	105642589	0.028261414	null				Not found	5.35602	12.7028	-7.34683
Chr6:21994681-22013291	6	21994681	22013291	0.028261414	null				Not found	5.38979	12.7298	-7.34003
Chr2:13646664-13654859	2	13646664	13654859	0.028261414	null				Not found	7.55919	14.7789	-7.21971
Chr12:32330716-32336173	12	32330716	32336173	0.028261414	null				Not found	3.13616	10.308	-7.17188
Chr7:59242347-59248128	7	59242347	59248128	0.028261414	null				Not found	2.49441	9.65356	-7.15915
Chr2:41710242-41722550	2	41710242	41722550	0.028261414	null				Not found	13.0071	19.8505	-6.84342
Chr10:73385960-73387039	10	73385960	73387039	0.028261414	null				Not found	6.84287	13.614	-6.77112
Chr15:149359849-149363766	15	149359849	149363766	0.028261414	null				Not found	2.99112	9.35035	-6.35922
Chr7:119152913-119156558	7	119152913	119156558	0.028261414	null				Not found	6.78015	0.472269	6.30788
Chr8:140090739-140097718	8	140090739	140097718	0.028261414	null				Not found	11.1546	4.78773	6.36683
Chr12:34125026-34128941	12	34125026	34128941	0.028261414	null				Not found	7.76201	1.04462	6.71739
Chr12:4763712-4766862	12	4763712	4766862	0.028261414	null				Not found	10.1812	3.22509	6.95615
Chr3:83496553-83504894	3	83496553	83504894	0.028261414	null				Not found	13.2924	6.23064	7.0618
Chr13:152970812-152989417	13	152970812	152989417	0.028261414	null				Not found	16.4859	9.39399	7.09192
Chr8:87730127-87737318	8	87730127	87737318	0.028261414	null				Not found	9.50273	2.22764	7.27509
Chr14:148357815-148361597	14	148357815	148361597	0.028261414	null				Not found	12.5536	5.24957	7.30402
Chr14:119061085-119065304	14	119061085	119065304	0.028261414	null				Not found	16.8981	9.59201	7.30608
Chr2:9472894-9476122	2	9472894	9476122	0.028261414	null				Not found	17.0441	9.72555	7.31855
Chr6:154321180-154323757	6	154321180	154323757	0.028261414	null				Not found	9.0673	1.73263	7.33467
Chr15:946163-955335	15	946163	955335	0.028261414	null				Not found	13.908	6.56436	7.34365
Chr1:169047062-169058918	1	169047062	169058918	0.028261414	null				Not found	11.2275	3.82702	7.40052
Chr7:106143924-106146988	7	106143924	106146988	0.028261414	null				Not found	14.0966	6.67788	7.4187
Chr8:11759157-11763436	8	11759157	11763436	0.028261414	null				Not found	15.3547	7.89	7.46466
Chr11:75162370-75165601	11	75162370	75165601	0.028261414	null				Not found	23.9236	16.4274	7.49622
Chr18:47386219-47392856	18	47386219	47392856	0.028261414	null				Not found	15.6193	8.11575	7.50353
Chr3:80342330-80347888	3	80342330	80347888	0.028261414	null				Not found	10.4168	2.89284	7.52394
Chr13:172061313-172082351	13	172061313	172082351	0.028261414	null				Not found	13.5849	6.03456	7.55037
Chr7:132199016-132201983	7	132199016	132201983	0.028261414	null				Not found	15.3285	7.7558	7.57273
Chr12:7493442-7496231	12	7493442	7496231	0.028261414	null				Not found	9.8115	2.21879	7.59271
Chr7:49637180-49644803	7	49637180	49644803	0.028261414	null				Not found	11.3466	3.75103	7.59553
Chr5:68651459-68656706	5	68651459	68656706	0.028261414	null				Not found	9.45488	1.81844	7.63644
Chr2:83428927-83434434	2	83428927	83434434	0.028261414	null				Not found	9.58074	1.91646	7.66428
Chr13:212166084-212170719	13	212166084	212170719	0.028261414	null				Not found	13.2902	5.61697	7.67323
Chr10:19195085-19199855	10	19195085	19199855	0.028261414	null				Not found	8.20628	0.505422	7.70085
Chr4:4729245-4734049	4	4729245	4734049	0.028261414	null				Not found	8.6606	0.956288	7.70432
Chr6:3757463-3759083	6	3757463	3759083	0.028261414	null				Not found	13.0514	5.31116	7.74019
Chr1:308527173-308529552	1	308527173	308529552	0.028261414	null				Not found	18.7535	10.9452	7.8083
Chr4:65906389-65920881	4	65906389	65920881	0.028261414	null				Not found	16.8168	8.98611	7.83069
Chr1:44041219-44055992	1	44041219	44055992	0.028261414	null				Not found	12.7068	4.87534	7.83146
Chr13:86699702-86703237	13	86699702	86703237	0.028261414	null				Not found	22.1771	14.2621	7.91501
Chr10:66950687-66960652	10	66950687	66960652	0.028261414	null				Not found	15.771	7.79873	7.97231
Chr13:26914894-26926024	13	26914894	26926024	0.028261414	null				Not found	22.3339	14.3489	7.98499
Chr2:74121323-74127724	2	74121323	74127724	0.028261414	null				Not found	19.0954	11.0759	8.01948
Chr4:79212437-79220757	4	79212437	79220757	0.028261414	null				Not found	12.2613	4.20265	8.05864
Chr1:209375260-209385631	1	209375260	209385631	0.028261414	null				Not found	25.4658	17.3919	8.07398
Chr14:103492526-103517186	14	103492526	103517186	0.028261414	null				Not found	15.0032	6.92158	8.08158
Chr18:54328326-54334793	18	54328326	54334793	0.028261414	null				Not found	10.682	2.59794	8.08401
Chr1:150310899-150323899	1	150310899	150323899	0.028261414	null				Not found	14.1675	6.06935	8.09817
Chr11:6693959-6695889	11	6693959	6695889	0.028261414	null				Not found	8.56386	0.458266	8.10559
Chr14:25960708-25969741	14	25960708	25969741	0.028261414	null				Not found	15.5348	7.42143	8.1134
Chr4:29320726-29344615	4	29320726	29344615	0.028261414	null				Not found	13.5645	5.43307	8.13144
Chr1:183604781-183612643	1	183604781	183612643	0.028261414	null				Not found	24.1625	16.0093	8.15322
Chr7:45067911-45071602	7	45067911	45071602	0.028261414	null				Not found	10.881	2.71983	8.16114
Chr13:119688582-119701055	13	119688582	119701055	0.028261414	null				Not found	23.4335	15.2564	8.17707
Chr2:82974562-82979995	2	82974562	82979995	0.028261414	null				Not found	12.0375	3.82517	8.2123
Chr12:26431344-26434591	12	26431344	26434591	0.028261414	null				Not found	14.1406	5.92395	8.21669
Chr13:60037765-60043166	13	60037765	60043166	0.028261414	null				Not found	10.0332	1.77075	8.26246
Chr8:34777587-34782471	8	34777587	34782471	0.028261414	null				Not found	10.9537	2.67432	8.27935
Chr11:66692709-66703467	11	66692709	66703467	0.028261414	null				Not found	14.489	6.19728	8.29176
Chr12:57949069-57954186	12	57949069	57954186	0.028261414	null				Not found	11.4743	3.13713	8.33714
Chr6:34933537-34939754	6	34933537	34939754	0.028261414	null				Not found	15.6416	7.30217	8.33944
Chr17:66977873-66980023	17	66977873	66980023	0.028261414	null				Not found	15.3472	6.9764	8.3708
Chr5:2401017-2402778	5	2401017	2402778	0.028261414	null				Not found	11.7169	3.34156	8.3753
Chr15:98141051-98180006	15	98141051	98180006	0.028261414	null				Not found	25.8417	17.4571	8.38462
Chr7:123202570-123206605	7	123202570	123206605	0.028261414	null				Not found	13.6218	5.22289	8.39892
Chr15:135248884-135255383	15	135248884	135255383	0.028261414	null				Not found	18.3414	9.92241	8.41894
Chr2:133923929-133936321	2	133923929	133936321	0.028261414	null				Not found	21.0329	12.5828	8.45009
Chr5:107076741-107085925	5	107076741	107085925	0.028261414	null				Not found	16.9424	8.43667	8.5057
Chr13:135880134-135889668	13	135880134	135889668	0.028261414	null				Not found	17.2093	8.70058	8.50871
Chr14:40486184-40492701	14	40486184	40492701	0.028261414	null				Not found	11.0236	2.47859	8.54504
Chr2:19035196-19038436	2	19035196	19038436	0.028261414	null				Not found	13.6141	5.06161	8.55247
Chr9:147563616-147567829	9	147563616	147567829	0.028261414	null				Not found	9.81138	1.2341	8.57728
Chr13:10242574-10259623	13	10242574	10259623	0.028261414	null				Not found	19.4668	10.8705	8.59629
Chr16:31788774-31864006	16	31788774	31864006	0.028261414	null				Not found	12.2017	3.60521	8.59653
Chr11:75311848-75316580	11	75311848	75316580	0.028261414	null				Not found	14.1367	5.52383	8.61289
Chr8:7709845-7718115	8	7709845	7718115	0.028261414	null				Not found	13.5684	4.93993	8.62843
Chr15:96092762-96108474	15	96092762	96108474	0.028261414	null				Not found	19.3475	10.7064	8.64119
Chr4:35012735-35024471	4	35012735	35024471	0.028261414	null				Not found	12.3221	3.67512	8.64697
Chr13:206749249-206752291	13	206749249	206752291	0.028261414	null				Not found	13.8263	5.17457	8.65169
Chr17:16324029-16334904	17	16324029	16334904	0.028261414	null				Not found	18.4033	9.74325	8.6601
Chr17:29680412-29684748	17	29680412	29684748	0.028261414	null				Not found	11.2915	2.5996	8.69192
Chr9:70517215-70521166	9	70517215	70521166	0.028261414	null				Not found	14.3083	5.58754	8.7208
Chr5:71704800-71708891	5	71704800	71708891	0.03380542	null				Not found	14.0871	5.36245	8.72463
Chr1:137387406-137402470	1	137387406	137402470	0.028261414	null				Not found	23.8593	15.1091	8.75021
Chr1:306298557-306301455	1	306298557	306301455	0.028261414	null				Not found	19.9969	11.2461	8.75086
Chr7:106078585-106082243	7	106078585	106082243	0.028261414	null				Not found	14.1331	5.37816	8.75491
Chr16:42943831-42951948	16	42943831	42951948	0.028261414	null				Not found	14.4277	5.64819	8.77953
Chr17:32352622-32358757	17	32352622	32358757	0.028261414	null				Not found	16.5261	7.74231	8.78377
Chr8:133692933-133703233	8	133692933	133703233	0.028261414	null				Not found	13.4588	4.64021	8.81854
Chr1:17446600-17451144	1	17446600	17451144	0.028261414	null				Not found	9.78764	0.953887	8.83375
Chr18:7223461-7229848	18	7223461	7229848	0.028261414	null				Not found	14.729	5.88335	8.84568
Chr2:97359087-97387144	2	97359087	97387144	0.028261414	null				Not found	17.7408	8.87896	8.86189
Chr18:45823688-45828268	18	45823688	45828268	0.028261414	null				Not found	15.0382	6.17379	8.86444
Chr17:62957864-62965240	17	62957864	62965240	0.028261414	null				Not found	19.065	10.1753	8.88976
Chr11:66754870-66766112	11	66754870	66766112	0.028261414	null				Not found	12.9722	4.08016	8.89203
Chr13:203231359-203239664	13	203231359	203239664	0.028261414	null				Not found	16.5146	7.62227	8.89237
Chr18:43687553-43701322	18	43687553	43701322	0.028261414	null				Not found	18.8987	9.99473	8.90398
Chr13:66883056-66905814	13	66883056	66905814	0.028261414	null				Not found	18.1834	9.27672	8.90667
Chr12:27377609-27386615	12	27377609	27386615	0.028261414	null				Not found	18.2199	9.30217	8.91772
Chr14:106845729-106862078	14	106845729	106862078	0.028261414	null				Not found	16.505	7.5528	8.95217
Chr4:101480732-101486201	4	101480732	101486201	0.028261414	null				Not found	10.5527	1.57837	8.97434
Chr4:10302369-10309167	4	10302369	10309167	0.028261414	null				Not found	18.4188	9.43806	8.9807
Chr14:2993388-2999864	14	2993388	2999864	0.028261414	null				Not found	22.3802	13.3791	9.00108
Chr18:56092058-56096752	18	56092058	56096752	0.028261414	null				Not found	10.5477	1.53247	9.01522
Chr10:7357896-7361701	10	7357896	7361701	0.028261414	null				Not found	18.6047	9.5673	9.03739
Chr8:24689285-24705681	8	24689285	24705681	0.028261414	null				Not found	15.6903	6.6338	9.05646
Chr13:80900792-80911215	13	80900792	80911215	0.028261414	null				Not found	23.2713	14.2123	9.05899
Chr1:237219908-237246561	1	237219908	237246561	0.028261414	null				Not found	15.002	5.93356	9.06844
Chr14:140437567-140440383	14	140437567	140440383	0.028261414	null				Not found	14.9679	5.88146	9.0864
Chr10:15866724-15873538	10	15866724	15873538	0.028261414	null				Not found	11.6399	2.54711	9.0928
Chr14:26122728-26136242	14	26122728	26136242	0.028261414	null				Not found	18.6349	9.54175	9.09318
Chr8:83980448-83991406	8	83980448	83991406	0.028261414	null				Not found	19.4992	10.3858	9.11346
Chr7:7920981-7925990	7	7920981	7925990	0.028261414	null				Not found	13.4254	4.30837	9.11704
Chr1:135689779-135711521	1	135689779	135711521	0.028261414	null				Not found	18.518	9.39948	9.11849
Chr7:45613273-45618389	7	45613273	45618389	0.028261414	null				Not found	12.0394	2.91893	9.12048
Chr6:42438790-42442320	6	42438790	42442320	0.028261414	null				Not found	15.0382	5.90271	9.13547
Chr9:83928831-83945092	9	83928831	83945092	0.035274208	null				Not found	16.1629	7.02182	9.14111
Chr6:31712179-31784103	6	31712179	31784103	0.028261414	null				Not found	17.3489	8.19473	9.15421
Chr7:131268360-131269944	7	131268360	131269944	0.028261414	null				Not found	25.0926	15.9344	9.1582
Chr1:182574268-182579458	1	182574268	182579458	0.028261414	null				Not found	17.3258	8.15063	9.17513
Chr3:69584631-69597532	3	69584631	69597532	0.028261414	null				Not found	16.5588	7.35244	9.20632
Chr1:146813467-146826932	1	146813467	146826932	0.028261414	null				Not found	15.7185	6.49306	9.22548
Chr4:67075054-67093702	4	67075054	67093702	0.028261414	null				Not found	16.9487	7.71373	9.23496
Chr6:116656772-116682484	6	116656772	116682484	0.028261414	null				Not found	14.8298	5.59236	9.2374
Chr6:154727877-154731672	6	154727877	154731672	0.028261414	null				Not found	11.271	2.02151	9.24946
Chr18:52231181-52235787	18	52231181	52235787	0.028261414	null				Not found	23.1381	13.8841	9.25391
[truncated: 1,114 more rows]

## Sheet: DMRs C-IVF vs In vivo
Probe	Chromosome	Start	End	Q-value	Feature	ID	Description	Type	Orientation	Distance	C-IVF	In vivo
Chr12:4024181-4026097	12	4024181	4026097	0.024365392	40057	ENSSSCG00000017168	Uncharacterized protein [Source:UniProtKB/TrEMBL;Acc:F1RZ71]	gene	overlapping	0	18.1725	4.68808
Chr12:4044898-4047066	12	4044898	4047066	0.014989286	40057	ENSSSCG00000017168	Uncharacterized protein [Source:UniProtKB/TrEMBL;Acc:F1RZ71]	gene	overlapping	0	5.98719	16.2916
Chr2:156475031-156478618	2	156475031	156478618	0.032790348	5-HT4R	ENSSSCG00000014428	5-hydroxytryptamine receptor 4 [Source:UniProtKB/Swiss-Prot;Acc:Q29006]	gene	overlapping	0	10.684	26.6597
Chr4:14499347-14510561	4	14499347	14510561	0.018885214	5S_rRNA	ENSSSCG00000025506	5S ribosomal RNA [Source:RFAM;Acc:RF00001]	gene	overlapping	0	6.7944	17.0044
Chr5:75747389-75753258	5	75747389	75753258	0.022437105	5S_rRNA	ENSSSCG00000020064	5S ribosomal RNA [Source:RFAM;Acc:RF00001]	gene	upstream	1174	9.12939	20.621
Chr14:107799731-107813555	14	107799731	107813555	0.022437105	A1CF	ENSSSCG00000010431	Uncharacterized protein [Source:UniProtKB/TrEMBL;Acc:F1SD00]	gene	overlapping	0	11.5634	23.6197
Chr9:39962032-39969976	9	39962032	39969976	0.014645071	AASDHPPT	ENSSSCG00000014998	Uncharacterized protein [Source:UniProtKB/TrEMBL;Acc:F1SV35]	gene	overlapping	0	30.4671	43.8491
Chr12:1484853-1486314	12	1484853	1486314	0.0226967	AATK	ENSSSCG00000017141	Uncharacterized protein [Source:UniProtKB/TrEMBL;Acc:F1RZY5]	gene	overlapping	0	21.5943	6.36569
Chr4:134966770-134973845	4	134966770	134973845	0.031775028	ABCA4	ENSSSCG00000006890	Uncharacterized protein [Source:UniProtKB/TrEMBL;Acc:F1S539]	gene	overlapping	0	20.5158	4.44509
Chr5:54843802-54855547	5	54843802	54855547	0.019102953	ABCC9	ENSSSCG00000000571	Uncharacterized protein [Source:UniProtKB/TrEMBL;Acc:F1SR11]	gene	overlapping	0	15.5682	6.24864
Chr5:54909284-54917943	5	54909284	54917943	0.035949163	ABCC9	ENSSSCG00000000571	Uncharacterized protein [Source:UniProtKB/TrEMBL;Acc:F1SR11]	gene	overlapping	0	18.8335	4.92766
Chr4:134499027-134501430	4	134499027	134501430	0.019102953	ABCD3	ENSSSCG00000028620	ATP-binding cassette sub-family D member 3 [Source:RefSeq peptide;Acc:NP_001231062]	gene	overlapping	0	21.7303	31.3755
Chr7:59482802-59485690	7	59482802	59485690	0.015932214	ACAN	ENSSSCG00000001832	aggrecan core protein [Source:RefSeq peptide;Acc:NP_001158124]	gene	overlapping	0	16.1608	4.30492
Chr9:12135571-12144481	9	12135571	12144481	0.038713694	ACER3	ENSSSCG00000014873	Uncharacterized protein [Source:UniProtKB/TrEMBL;Acc:F1SUK8]	gene	overlapping	0	11.8068	27.6582
Chr7:81304934-81313287	7	81304934	81313287	0.017422765	ACIN1	ENSSSCG00000002034	Uncharacterized protein [Source:UniProtKB/TrEMBL;Acc:F1S9D1]	gene	overlapping	0	20.5934	8.66218
Chr12:21090093-21091775	12	21090093	21091775	0.011869259	ACLY	ENSSSCG00000017421	ATP citrate lyase [Source:RefSeq peptide;Acc:NP_001098772]	gene	overlapping	0	13.7943	21.8524
Chr6:831261-832391	6	831261	832391	0.035340637	ACSF3	ENSSSCG00000023866	acyl-CoA synthetase family member 3 [Source:HGNC Symbol;Acc:27288]	gene	overlapping	0	18.8286	33.0793
Chr2:139581883-139584993	2	139581883	139584993	0.018088836	ACSL6	ENSSSCG00000014272	Uncharacterized protein [Source:UniProtKB/TrEMBL;Acc:F1RJV7]	gene	overlapping	0	16.09	28.1357
Chr17:34978472-34982972	17	34978472	34982972	0.015593054	ACSS1	ENSSSCG00000007133	acyl-CoA synthetase short-chain family member 1 [Source:HGNC Symbol;Acc:16091]	gene	overlapping	0	14.0734	5.01221
Chr6:43083929-43087338	6	43083929	43087338	0.028431408	ACTN4	ENSSSCG00000002965	Uncharacterized protein [Source:UniProtKB/TrEMBL;Acc:F1RI39]	gene	overlapping	0	11.8811	23.7895
Chr6:43098720-43100682	6	43098720	43100682	0.017762743	ACTN4	ENSSSCG00000002965	Uncharacterized protein [Source:UniProtKB/TrEMBL;Acc:F1RI39]	gene	overlapping	0	28.5633	16.6506
Chr6:59250746-59252607	6	59250746	59252607	0.040754832	ACTRT2	ENSSSCG00000003357	Uncharacterized protein [Source:UniProtKB/TrEMBL;Acc:F1RJB0]	gene	downstream	1304	10.97	25.8365
Chr5:17855737-17860293	5	17855737	17860293	0.01762378	ACVRL1	ENSSSCG00000000232	Uncharacterized protein [Source:UniProtKB/TrEMBL;Acc:F1SGK0]	gene	downstream	274	15.284	5.72293
Chr15:121412290-121421220	15	121412290	121421220	0.02724011	ADAM23	ENSSSCG00000016131	Uncharacterized protein [Source:UniProtKB/TrEMBL;Acc:F1SHD2]	gene	overlapping	0	19.8505	3.38913
Chr14:79463291-79466632	14	79463291	79466632	0.015593054	ADAMTS14	ENSSSCG00000010272	Uncharacterized protein [Source:UniProtKB/TrEMBL;Acc:F1SUB5]	gene	overlapping	0	7.37178	21.606
Chr9:63419933-63422121	9	63419933	63422121	0.014989286	ADAMTS15	ENSSSCG00000015250	ADAM metallopeptidase with thrombospondin type 1 motif, 15 [Source:HGNC Symbol;Acc:16305]	gene	overlapping	0	7.82888	0.534286
Chr16:82698934-82702943	16	82698934	82702943	0.018979501	ADAMTS16	ENSSSCG00000017109	Uncharacterized protein [Source:UniProtKB/TrEMBL;Acc:F1S046]	gene	overlapping	0	21.0593	9.38627
Chr2:80940260-80943896	2	80940260	80943896	0.026155578	ADAMTS2	ENSSSCG00000024043	Uncharacterized protein [Source:UniProtKB/TrEMBL;Acc:F1S427]	gene	overlapping	0	30.3454	14.474
Chr5:77453770-77469805	5	77453770	77469805	0.015594315	ADAMTS20	ENSSSCG00000000795	ADAM metallopeptidase with thrombospondin type 1 motif, 20 [Source:HGNC Symbol;Acc:17178]	gene	overlapping	0	8.06759	18.2685
Chr16:47101172-47121296	16	47101172	47121296	0.014989286	ADAMTS6	ENSSSCG00000016943	Uncharacterized protein [Source:UniProtKB/TrEMBL;Acc:F1SKU0]	gene	overlapping	0	12.7552	20.2499
Chr13:50673761-50682946	13	50673761	50682946	0.020191148	ADAMTS9	ENSSSCG00000011496	Uncharacterized protein [Source:UniProtKB/TrEMBL;Acc:F1SFS3]	gene	overlapping	0	8.5806	26.6574
Chr13:217652027-217653432	13	217652027	217653432	0.029492773	ADARB1	ENSSSCG00000012089	adenosine deaminase, RNA-specific, B1 [Source:HGNC Symbol;Acc:226]	gene	overlapping	0	8.23242	20.2736
Chr13:217662101-217663043	13	217662101	217663043	0.0205094	ADARB1	ENSSSCG00000012089	adenosine deaminase, RNA-specific, B1 [Source:HGNC Symbol;Acc:226]	gene	overlapping	0	16.7785	30.4777
Chr13:217687828-217689445	13	217687828	217689445	0.01694489	ADARB1	ENSSSCG00000012089	adenosine deaminase, RNA-specific, B1 [Source:HGNC Symbol;Acc:226]	gene	overlapping	0	19.8564	31.8549
Chr13:217725773-217727635	13	217725773	217727635	0.014989286	ADARB1	ENSSSCG00000012089	adenosine deaminase, RNA-specific, B1 [Source:HGNC Symbol;Acc:226]	gene	overlapping	0	15.9555	4.48985
Chr13:217765737-217766642	13	217765737	217766642	0.015634118	ADARB1	ENSSSCG00000012089	adenosine deaminase, RNA-specific, B1 [Source:HGNC Symbol;Acc:226]	gene	overlapping	0	14.3657	26.0368
Chr18:54966257-54968794	18	54966257	54968794	0.01762378	ADCY1	ENSSSCG00000016726	Uncharacterized protein [Source:UniProtKB/TrEMBL;Acc:F1ST77]	gene	overlapping	0	27.2919	10.3048
Chr16:80529473-80532164	16	80529473	80532164	0.0205094	ADCY2	ENSSSCG00000017101	adenylate cyclase 2 (brain) [Source:HGNC Symbol;Acc:233]	gene	overlapping	0	24.1129	8.83071
Chr3:121160349-121162807	3	121160349	121162807	0.02724011	ADCY3	ENSSSCG00000008578	Uncharacterized protein [Source:UniProtKB/TrEMBL;Acc:F1SDL2]	gene	overlapping	0	18.3611	31.3065
Chr1:21060887-21068924	1	21060887	21068924	0.03190212	ADGB	ENSSSCG00000004114	androglobin [Source:HGNC Symbol;Acc:21212]	gene	overlapping	0	25.2124	10.7183
Chr3:140462901-140464511	3	140462901	140464511	0.048912898	ADI1	ENSSSCG00000029161	acireductone dioxygenase 1 [Source:RefSeq peptide;Acc:NP_001230627]	gene	overlapping	0	23.4071	8.88227
Chr14:83059690-83076209	14	83059690	83076209	0.021252168	ADK	ENSSSCG00000010315	Uncharacterized protein [Source:UniProtKB/TrEMBL;Acc:F1S2G5]	gene	overlapping	0	23.2739	10.2318
Chr5:5278147-5281434	5	5278147	5281434	0.04898538	ADSL	ENSSSCG00000000077	adenylosuccinate lyase [Source:RefSeq peptide;Acc:NP_001124205]	gene	downstream	84	10.1502	0.982757
Chr2:157245702-157247492	2	157245702	157247492	0.021860613	AFAP1L1	ENSSSCG00000014431	Uncharacterized protein [Source:UniProtKB/TrEMBL;Acc:F1RL95]	gene	overlapping	0	24.6709	38.2469
Chr8:141028717-141032925	8	141028717	141032925	0.032602385	AFF1	ENSSSCG00000009224	Uncharacterized protein [Source:UniProtKB/TrEMBL;Acc:F1RW30]	gene	overlapping	0	7.87246	19.9769
ChrX:138462215-138467427	X	138462215	138467427	0.015965132	AFF2	ENSSSCG00000012730	AF4/FMR2 family, member 2 [Source:HGNC Symbol;Acc:3776]	gene	overlapping	0	6.89665	26.9296
ChrX:138493035-138496925	X	138493035	138496925	0.020869285	AFF2	ENSSSCG00000012730	AF4/FMR2 family, member 2 [Source:HGNC Symbol;Acc:3776]	gene	overlapping	0	18.3222	32.962
ChrX:138700049-138702778	X	138700049	138702778	0.03077415	AFF2	ENSSSCG00000012730	AF4/FMR2 family, member 2 [Source:HGNC Symbol;Acc:3776]	gene	overlapping	0	14.2987	40.0566
Chr15:150375260-150380204	15	150375260	150380204	0.047417168	AGAP1	ENSSSCG00000016317	Uncharacterized protein [Source:UniProtKB/TrEMBL;Acc:F1SM10]	gene	overlapping	0	24.0554	7.37548
Chr18:8682421-8690100	18	8682421	8690100	0.015593054	AGK	ENSSSCG00000016492	Uncharacterized protein [Source:UniProtKB/TrEMBL;Acc:F1SRQ3]	gene	overlapping	0	16.7374	8.42662
Chr1:8402920-8405450	1	8402920	8405450	0.021281665	AGPAT4	ENSSSCG00000004033	1-acyl-sn-glycerol-3-phosphate acyltransferase delta [Source:RefSeq peptide;Acc:NP_001137169]	gene	overlapping	0	30.9204	14.5644
Chr1:8427663-8430566	1	8427663	8430566	0.015669202	AGPAT4	ENSSSCG00000004033	1-acyl-sn-glycerol-3-phosphate acyltransferase delta [Source:RefSeq peptide;Acc:NP_001137169]	gene	overlapping	0	18.863	35.2564
Chr8:144226363-144231615	8	144226363	144231615	0.041920442	AGPAT9	ENSSSCG00000009233	Uncharacterized protein [Source:UniProtKB/TrEMBL;Acc:F1RW11]	gene	overlapping	0	32.9332	9.87557
Chr15:92634898-92645587	15	92634898	92645587	0.023691421	AGPS	ENSSSCG00000023983	alkylglycerone phosphate synthase [Source:HGNC Symbol;Acc:327]	gene	overlapping	0	12.7687	28.9155
Chr3:5171722-5172806	3	5171722	5172806	0.020662967	AIMP2	ENSSSCG00000024245	aminoacyl tRNA synthase complex-interacting multifunctional protein 2 isoform 1 [Source:RefSeq peptide;Acc:NP_001231485]	gene	overlapping	0	18.4215	29.5847
Chr6:135657942-135662391	6	135657942	135662391	0.01762378	AK3L1	ENSSSCG00000003808	adenylate kinase isoenzyme 4, mitochondrial [Source:RefSeq peptide;Acc:NP_001038062]	gene	overlapping	0	20.7746	9.49932
ChrX:113369920-113374304	X	113369920	113374304	0.017561477	AKAP14	ENSSSCG00000012614	A kinase (PRKA) anchor protein 14 [Source:HGNC Symbol;Acc:24061]	gene	overlapping	0	5.79378	24.6151
Chr4:121701686-121710497	4	121701686	121710497	0.01446586	AKNAD1	ENSSSCG00000006842	AKNA domain containing 1 [Source:HGNC Symbol;Acc:28398]	gene	overlapping	0	15.3886	2.93441
Chr6:44369297-44372233	6	44369297	44372233	0.01987769	AKT2	ENSSSCG00000002989	Uncharacterized protein; V-akt murine thymoma viral oncogene-like 2 [Source:UniProtKB/TrEMBL;Acc:F1RHD4]	gene	overlapping	0	19.3826	31.3351
Chr4:134120488-134123682	4	134120488	134123682	0.018525917	ALG14	ENSSSCG00000006885	Uncharacterized protein [Source:UniProtKB/TrEMBL;Acc:F1S544]	gene	overlapping	0	8.87261	19.5681
Chr14:44330100-44333067	14	44330100	44333067	0.017237658	ALKBH2	ENSSSCG00000026053	Uncharacterized protein [Source:UniProtKB/TrEMBL;Acc:F1RGB3]	gene	overlapping	0	19.7733	8.22614
Chr12:54502837-54504021	12	54502837	54504021	0.023997659	ALOX15	ENSSSCG00000017923	Arachidonate 12-lipoxygenase, 12S-type [Source:UniProtKB/Swiss-Prot;Acc:P16469]	gene	overlapping	0	15.3852	0.605406
Chr15:117867213-117874583	15	117867213	117874583	0.019840408	ALS2CR8	ENSSSCG00000016117	Uncharacterized protein [Source:UniProtKB/TrEMBL;Acc:F1SHE7]	gene	overlapping	0	18.8927	8.48545
Chr9:50562055-50568633	9	50562055	50568633	0.016239073	AMICA1	ENSSSCG00000015089	Uncharacterized protein [Source:UniProtKB/TrEMBL;Acc:F1SAL1]	gene	overlapping	0	14.9394	6.62339
ChrX:103893355-103901539	X	103893355	103901539	0.026841566	AMMECR1	ENSSSCG00000012574	Uncharacterized protein [Source:UniProtKB/TrEMBL;Acc:F1RXH0]	gene	overlapping	0	8.51083	25.1236
ChrX:103943493-103950957	X	103943493	103950957	0.029816708	AMMECR1	ENSSSCG00000012574	Uncharacterized protein [Source:UniProtKB/TrEMBL;Acc:F1RXH0]	gene	overlapping	0	24.9674	45.1969
Chr9:30674884-30677055	9	30674884	30677055	0.015965132	AMOTL1	ENSSSCG00000014960	Uncharacterized protein [Source:UniProtKB/TrEMBL;Acc:F1STJ4]	gene	overlapping	0	13.2158	2.47398
Chr9:119653969-119660883	9	119653969	119660883	0.018027991	AMPH	ENSSSCG00000024136	amphiphysin [Source:RefSeq peptide;Acc:NP_001231132]	gene	overlapping	0	12.1239	30.8388
Chr15:42690641-42699335	15	42690641	42699335	0.015634118	ANGPT2	ENSSSCG00000015753	Angiopoietin-2 [Source:UniProtKB/Swiss-Prot;Acc:Q9BDY7]	gene	overlapping	0	11.8062	20.5158
Chr14:68508001-68515545	14	68508001	68515545	0.016777236	ANK3	ENSSSCG00000010212	ankyrin 3, node of Ranvier (ankyrin G) [Source:HGNC Symbol;Acc:494]	gene	overlapping	0	9.69718	25.2498
Chr14:68663911-68674448	14	68663911	68674448	0.019102953	ANK3	ENSSSCG00000010212	ankyrin 3, node of Ranvier (ankyrin G) [Source:HGNC Symbol;Acc:494]	gene	overlapping	0	4.7015	16.7655
Chr12:52177522-52183959	12	52177522	52183959	0.0332777	ANKFY1	ENSSSCG00000017877	Uncharacterized protein [Source:UniProtKB/TrEMBL;Acc:F1RGQ6]	gene	overlapping	0	33.5558	13.3256
Chr16:4460812-4464539	16	4460812	4464539	0.014989286	ANKH	ENSSSCG00000016784	Uncharacterized protein [Source:UniProtKB/TrEMBL;Acc:F1SRN1]	gene	overlapping	0	10.4284	2.01635
Chr15:154476031-154476951	15	154476031	154476951	0.017561477	ANKMY1	ENSSSCG00000016365	Uncharacterized protein [Source:UniProtKB/TrEMBL;Acc:F1SIQ4]	gene	overlapping	0	4.02625	17.1292
Chr15:154488406-154489433	15	154488406	154489433	0.016206505	ANKMY1	ENSSSCG00000016365	Uncharacterized protein [Source:UniProtKB/TrEMBL;Acc:F1SIQ4]	gene	overlapping	0	2.19149	10.3116
Chr6:757588-759012	6	757588	759012	0.027035888	ANKRD11	ENSSSCG00000022410	ankyrin repeat domain 11 [Source:HGNC Symbol;Acc:21316]	gene	overlapping	0	21.9836	38.4961
Chr15:112174242-112179445	15	112174242	112179445	0.039862875	ANKRD44	ENSSSCG00000016074	Uncharacterized protein [Source:UniProtKB/TrEMBL;Acc:F1SN09]	gene	overlapping	0	20.2995	39.0148
Chr7:35578340-35583128	7	35578340	35583128	0.0323766	ANKS1A	ENSSSCG00000001534	Ankyrin repeat and sterile alpha motif domain-containing 1A [Source:UniProtKB/TrEMBL;Acc:F8SIP9]	gene	overlapping	0	6.75548	21.2158
Chr7:35588347-35594724	7	35588347	35594724	0.017498374	ANKS1A	ENSSSCG00000001534	Ankyrin repeat and sterile alpha motif domain-containing 1A [Source:UniProtKB/TrEMBL;Acc:F8SIP9]	gene	overlapping	0	6.01958	20.4305
Chr7:35767176-35769340	7	35767176	35769340	0.023413727	ANKS1A	ENSSSCG00000001534	Ankyrin repeat and sterile alpha motif domain-containing 1A [Source:UniProtKB/TrEMBL;Acc:F8SIP9]	gene	upstream	1059	11.8012	21.9208
Chr8:146871760-146872251	8	146871760	146872251	0.031058425	ANTXR2	ENSSSCG00000009256	Uncharacterized protein [Source:UniProtKB/TrEMBL;Acc:F1RVC2]	gene	downstream	325	11.6586	37.0405
Chr8:146900021-146902539	8	146900021	146902539	0.028892504	ANTXR2	ENSSSCG00000009256	Uncharacterized protein [Source:UniProtKB/TrEMBL;Acc:F1RVC2]	gene	overlapping	0	16.6534	42.3342
Chr8:146945839-146949224	8	146945839	146949224	0.034506675	ANTXR2	ENSSSCG00000009256	Uncharacterized protein [Source:UniProtKB/TrEMBL;Acc:F1RVC2]	gene	overlapping	0	23.7995	42.8323
Chr2:88871-90519	2	88871	90519	0.04411477	AP2A2	ENSSSCG00000012836	Uncharacterized protein [Source:UniProtKB/TrEMBL;Acc:F1RZ02]	gene	overlapping	0	28.8807	45.6895
Chr3:77285478-77297539	3	77285478	77297539	0.024868062	APLF	ENSSSCG00000008346	Uncharacterized protein [Source:UniProtKB/TrEMBL;Acc:F1SJ24]	gene	overlapping	0	13.5784	24.5161
Chr6:146597140-146599657	6	146597140	146599657	0.014597619	APOER2	ENSSSCG00000003848	low-density lipoprotein receptor-related protein 8 [Source:RefSeq peptide;Acc:NP_001186820]	gene	overlapping	0	18.4369	36.7078
Chr6:146611228-146612923	6	146611228	146612923	0.026862696	APOER2	ENSSSCG00000003848	low-density lipoprotein receptor-related protein 8 [Source:RefSeq peptide;Acc:NP_001186820]	gene	overlapping	0	10.9046	32.3038
Chr5:23297162-23304569	5	23297162	23304569	0.022784486	APON	ENSSSCG00000000398	ovarian and testicular apolipoprotein N [Source:RefSeq peptide;Acc:NP_001003925]	gene	upstream	301	15.2654	4.76592
ChrX:47389156-47391783	X	47389156	47391783	0.030297467	ARAF	ENSSSCG00000012275	Serine/threonine-protein kinase A-Raf [Source:UniProtKB/Swiss-Prot;Acc:O19004]	gene	overlapping	0	30.0788	51.5264
Chr9:8001422-8003398	9	8001422	8003398	0.030600728	ARAP1	ENSSSCG00000014817	ArfGAP with RhoGAP domain, ankyrin repeat and PH domain 1 [Source:HGNC Symbol;Acc:16925]	gene	overlapping	0	37.1915	17.7148
Chr9:8009134-8010413	9	8009134	8010413	0.032378875	ARAP1	ENSSSCG00000014817	ArfGAP with RhoGAP domain, ankyrin repeat and PH domain 1 [Source:HGNC Symbol;Acc:16925]	gene	overlapping	0	22.1364	2.56118
Chr9:8029665-8031833	9	8029665	8031833	0.015634118	ARAP1	ENSSSCG00000014817	ArfGAP with RhoGAP domain, ankyrin repeat and PH domain 1 [Source:HGNC Symbol;Acc:16925]	gene	overlapping	0	15.8432	27.3491
Chr5:3397107-3402660	5	3397107	3402660	0.014989286	ARFGAP3	ENSSSCG00000000037	Uncharacterized protein [Source:UniProtKB/TrEMBL;Acc:F1SJR4]	gene	overlapping	0	6.71423	23.1958
Chr5:3436382-3442465	5	3436382	3442465	0.034857452	ARFGAP3	ENSSSCG00000000037	Uncharacterized protein [Source:UniProtKB/TrEMBL;Acc:F1SJR4]	gene	overlapping	0	12.8655	23.0666
Chr5:3488169-3490286	5	3488169	3490286	0.01618038	ARFGAP3	ENSSSCG00000000037	Uncharacterized protein [Source:UniProtKB/TrEMBL;Acc:F1SJR4]	gene	overlapping	0	34.7215	17.8217
Chr10:47075630-47085334	10	47075630	47085334	0.038709607	ARHGAP12	ENSSSCG00000011026	Uncharacterized protein [Source:UniProtKB/TrEMBL;Acc:F1RWC6]	gene	overlapping	0	21.4045	31.8203
Chr2:150576349-150578705	2	150576349	150578705	0.01618038	ARHGAP26	ENSSSCG00000014399	Uncharacterized protein [Source:UniProtKB/TrEMBL;Acc:F1RM37]	gene	overlapping	0	13.6248	30.2397
Chr6:93769598-93778791	6	93769598	93778791	0.026722472	ARHGAP28	ENSSSCG00000003686	Uncharacterized protein [Source:UniProtKB/TrEMBL;Acc:F1SM88]	gene	overlapping	0	5.03185	18.1034
Chr9:62072138-62081207	9	62072138	62081207	0.020223428	ARHGAP32	ENSSSCG00000015238	Uncharacterized protein [Source:UniProtKB/TrEMBL;Acc:F1S6F5]	gene	overlapping	0	26.7523	15.1479
ChrX:8468663-8472383	X	8468663	8472383	0.015160902	ARHGAP6	ENSSSCG00000012112	Uncharacterized protein [Source:UniProtKB/TrEMBL;Acc:F1SG15]	gene	upstream	432	11.2844	3.0089
ChrX:8585524-8592837	X	8585524	8592837	0.018824909	ARHGAP6	ENSSSCG00000012112	Uncharacterized protein [Source:UniProtKB/TrEMBL;Acc:F1SG15]	gene	overlapping	0	14.2296	2.67967
Chr6:70498365-70502161	6	70498365	70502161	0.02568628	ARHGEF10L	ENSSSCG00000003486	Rho guanine nucleotide exchange factor (GEF) 10-like [Source:HGNC Symbol;Acc:25540]	gene	overlapping	0	8.94647	19.4384
Chr4:101564835-101568801	4	101564835	101568801	0.019679438	ARHGEF11	ENSSSCG00000006461	Uncharacterized protein [Source:UniProtKB/TrEMBL;Acc:F1RHK9]	gene	overlapping	0	18.2101	7.53902
Chr6:59771148-59773536	6	59771148	59773536	0.015634118	ARHGEF16	ENSSSCG00000024223	Rho guanine nucleotide exchange factor (GEF) 16 [Source:HGNC Symbol;Acc:15515]	gene	overlapping	0	8.54284	20.1583
Chr8:124683104-124689362	8	124683104	124689362	0.017762743	ARHGEF38	ENSSSCG00000009156	Uncharacterized protein [Source:UniProtKB/TrEMBL;Acc:F1S117]	gene	overlapping	0	6.09602	17.3255
Chr8:124712134-124723390	8	124712134	124723390	0.022437105	ARHGEF38	ENSSSCG00000009156	Uncharacterized protein [Source:UniProtKB/TrEMBL;Acc:F1S117]	gene	overlapping	0	21.8525	13.555
Chr2:77556121-77560383	2	77556121	77560383	0.045201328	ARID3A	ENSSSCG00000013414	Uncharacterized protein [Source:UniProtKB/TrEMBL;Acc:F1S6T2]	gene	overlapping	0	33.7053	20.2136
Chr1:84300662-84306878	1	84300662	84306878	0.018027991	ARMC2	ENSSSCG00000004388	armadillo repeat containing 2 [Source:HGNC Symbol;Acc:23045]	gene	overlapping	0	9.76421	23.292
Chr1:84325268-84329492	1	84325268	84329492	0.020373192	ARMC2	ENSSSCG00000004388	armadillo repeat containing 2 [Source:HGNC Symbol;Acc:23045]	gene	overlapping	0	22.8854	38.8635
Chr1:84339654-84357241	1	84339654	84357241	0.017762743	ARMC2	ENSSSCG00000004388	armadillo repeat containing 2 [Source:HGNC Symbol;Acc:23045]	gene	overlapping	0	21.6891	12.1247
Chr3:17356962-17361136	3	17356962	17361136	0.022372495	ARMC5	ENSSSCG00000025245	armadillo repeat containing 5 [Source:HGNC Symbol;Acc:25781]	gene	upstream	1365	26.8068	10.6378
Chr3:6441027-6442743	3	6441027	6442743	0.016893184	ARPC1A	ENSSSCG00000007609	actin-related protein 2/3 complex subunit 1A [Source:RefSeq peptide;Acc:NP_001127827]	gene	overlapping	0	17.0475	7.23146
Chr14:107855386-107872881	14	107855386	107872881	0.015965132	ASAH2	ENSSSCG00000010432	Uncharacterized protein [Source:UniProtKB/TrEMBL;Acc:F1SCZ9]	gene	overlapping	0	8.9537	19.5097
Chr3:135331719-135333405	3	135331719	135333405	0.030146059	ASAP2	ENSSSCG00000008642	ArfGAP with SH3 domain, ankyrin repeat and PH domain 2 [Source:HGNC Symbol;Acc:2721]	gene	overlapping	0	20.1725	43.8962
Chr3:135337962-135338896	3	135337962	135338896	0.03899911	ASAP2	ENSSSCG00000008642	ArfGAP with SH3 domain, ankyrin repeat and PH domain 2 [Source:HGNC Symbol;Acc:2721]	gene	overlapping	0	41.0226	23.668
Chr2:8645918-8648895	2	8645918	8648895	0.01618038	ASRGL1	ENSSSCG00000013065	Uncharacterized protein [Source:UniProtKB/TrEMBL;Acc:F1RPW8]	gene	upstream	738	14.814	5.93858
Chr1:288641348-288648725	1	288641348	288648725	0.021496737	ASTN2	ENSSSCG00000005502	Uncharacterized protein [Source:UniProtKB/TrEMBL;Acc:F1SMI1]	gene	overlapping	0	17.4728	27.4037
Chr17:40978182-40980894	17	40978182	40980894	0.023679094	ASXL1	ENSSSCG00000007248	Uncharacterized protein [Source:UniProtKB/TrEMBL;Acc:F1S518]	gene	overlapping	0	14.5979	31.9531
Chr3:120109848-120120208	3	120109848	120120208	0.01762378	ASXL2	ENSSSCG00000008575	Uncharacterized protein [Source:UniProtKB/TrEMBL;Acc:F1SDL7]	gene	overlapping	0	22.7762	10.3679
Chr9:40794218-40802710	9	40794218	40802710	0.022158997	ATM	ENSSSCG00000025606	Serine-protein kinase ATM [Source:UniProtKB/Swiss-Prot;Acc:Q6PQD5]	gene	overlapping	0	6.02951	17.0273
ChrX:130615644-130629615	X	130615644	130629615	0.015634118	ATP11C	ENSSSCG00000012713	Uncharacterized protein [Source:UniProtKB/TrEMBL;Acc:F1RQ73]	gene	overlapping	0	10.1757	17.4828
Chr13:207328484-207334734	13	207328484	207334734	0.018644467	ATP5O	ENSSSCG00000012042	ATP synthase subunit O, mitochondrial [Source:UniProtKB/Swiss-Prot;Acc:Q2EN81]	gene	upstream	1552	24.8422	12.0414
Chr18:11412325-11415887	18	11412325	11415887	0.017561477	ATP6V0A4	ENSSSCG00000016516	ATPase, H+ transporting, lysosomal V0 subunit a4 [Source:HGNC Symbol;Acc:866]	gene	overlapping	0	16.3698	28.1273
Chr8:35290209-35298009	8	35290209	35298009	0.027350621	ATP8A1	ENSSSCG00000008803	Uncharacterized protein [Source:UniProtKB/TrEMBL;Acc:F1S3T6]	gene	overlapping	0	2.79475	19.7778
Chr8:35298168-35307557	8	35298168	35307557	0.022920353	ATP8A1	ENSSSCG00000008803	Uncharacterized protein [Source:UniProtKB/TrEMBL;Acc:F1S3T6]	gene	overlapping	0	16.8063	27.0609
Chr4:104362039-104365124	4	104362039	104365124	0.022784486	ATP8B2	ENSSSCG00000006550	Uncharacterized protein [Source:UniProtKB/TrEMBL;Acc:F1RGL1]	gene	upstream	342	22.3288	11.211
Chr9:116468760-116473390	9	116468760	116473390	0.015634118	ATXN7L1	ENSSSCG00000015432	ataxin 7-like 1 [Source:HGNC Symbol;Acc:22210]	gene	overlapping	0	11.7789	21.1771
Chr12:55887387-55890930	12	55887387	55890930	0.014645071	AURKB	ENSSSCG00000028924	Aurora kinase B [Source:UniProtKB/Swiss-Prot;Acc:Q9N0X0]	gene	overlapping	0	13.6935	7.10202
Chr3:14875543-14879832	3	14875543	14879832	0.017771397	AUTS2	ENSSSCG00000007727	Autism susceptibility gene 2 [Source:UniProtKB/TrEMBL;Acc:F7IY48]	gene	overlapping	0	24.4876	8.86164
Chr3:14883559-14887350	3	14883559	14887350	0.020192476	AUTS2	ENSSSCG00000007727	Autism susceptibility gene 2 [Source:UniProtKB/TrEMBL;Acc:F7IY48]	gene	overlapping	0	9.20789	25.2635
Chr3:41036443-41037297	3	41036443	41037297	0.03795203	AXIN1	ENSSSCG00000023204	axin 1 [Source:HGNC Symbol;Acc:903]	gene	overlapping	0	16.8855	28.7459
Chr3:41037305-41038389	3	41037305	41038389	0.029056929	AXIN1	ENSSSCG00000023204	axin 1 [Source:HGNC Symbol;Acc:903]	gene	overlapping	0	22.1655	42.3329
Chr12:1446873-1448491	12	1446873	1448491	0.01987769	AZI1	ENSSSCG00000017143	Uncharacterized protein [Source:UniProtKB/TrEMBL;Acc:F1RZA9]	gene	overlapping	0	4.75174	21.4661
Chr13:213579804-213581596	13	213579804	213581596	0.032495283	B3GALT5	ENSSSCG00000012070	Uncharacterized protein [Source:UniProtKB/TrEMBL;Acc:F1SGT9]	gene	overlapping	0	25.2102	13.7128
Chr11:7874160-7879872	11	7874160	7879872	0.017803876	B3GALTL	ENSSSCG00000009335	Uncharacterized protein [Source:UniProtKB/TrEMBL;Acc:F1RSS9]	gene	overlapping	0	11.313	22.8885
Chr1:57284603-57293949	1	57284603	57293949	0.022437105	B3GAT2	ENSSSCG00000026246	Uncharacterized protein [Source:UniProtKB/TrEMBL;Acc:F1RTS9]	gene	overlapping	0	26.7875	37.1484
Chr13:130480230-130492035	13	130480230	130492035	0.017762743	B3GNT5	ENSSSCG00000024393	UDP-GlcNAc:betaGal beta-1,3-N-acetylglucosaminyltransferase 5 [Source:UniProtKB/Swiss-Prot;Acc:Q864U8]	gene	overlapping	0	5.66352	18.054
Chr12:447066-448533	12	447066	448533	0.0262616	B3GNTL1	ENSSSCG00000027229	UDP-GlcNAc:betaGal beta-1,3-N-acetylglucosaminyltransferase-like 1 [Source:HGNC Symbol;Acc:21727]	gene	overlapping	0	36.8562	49.5422
Chr12:472865-474425	12	472865	474425	0.016893184	B3GNTL1	ENSSSCG00000027229	UDP-GlcNAc:betaGal beta-1,3-N-acetylglucosaminyltransferase-like 1 [Source:HGNC Symbol;Acc:21727]	gene	overlapping	0	13.0709	32.3924
Chr13:203140911-203148847	13	203140911	203148847	0.02093628	BACH1	ENSSSCG00000012029	Uncharacterized protein [Source:UniProtKB/TrEMBL;Acc:F1SHM8]	gene	overlapping	0	12.14	22.0184
Chr1:55508451-55528675	1	55508451	55528675	0.015965132	BAI3	ENSSSCG00000004270	Uncharacterized protein [Source:UniProtKB/TrEMBL;Acc:F1RTT7]	gene	overlapping	0	6.02098	17.059
Chr7:27472728-27476101	7	27472728	27476101	0.015634118	BAT4	ENSSSCG00000001413	protein BAT4 [Source:RefSeq peptide;Acc:NP_001138855]	gene	overlapping	0	10.5545	3.41347
Chr3:10462529-10464028	3	10462529	10464028	0.021401294	BAZ1B	ENSSSCG00000027342	Uncharacterized protein [Source:UniProtKB/TrEMBL;Acc:F1RJN2]	gene	overlapping	0	24.5093	34.1162
Chr17:61758657-61768096	17	61758657	61768096	0.020191148	BCAS1	ENSSSCG00000007485	breast carcinoma-amplified sequence 1 [Source:RefSeq peptide;Acc:NP_001103645]	gene	overlapping	0	20.5134	6.26358
ChrX:39850788-39853112	X	39850788	39853112	0.027053772	BCOR	ENSSSCG00000012241	Uncharacterized protein [Source:UniProtKB/TrEMBL;Acc:F1RXQ4]	gene	overlapping	0	15.0191	3.85728
Chr7:124749683-124753132	7	124749683	124753132	0.017762743	BDKRB1	ENSSSCG00000002501	B1 bradykinin receptor [Source:UniProtKB/Swiss-Prot;Acc:Q8HZN9]	gene	upstream	570	14.1497	5.88692
Chr2:35235518-35242316	2	35235518	35242316	0.018701633	BDNF	ENSSSCG00000013333	Brain-derived neurotrophic factor [Source:UniProtKB/Swiss-Prot;Acc:P14082]	gene	overlapping	0	15.4195	38.2327
Chr13:82030707-82047562	13	82030707	82047562	0.030187005	BFSP2	ENSSSCG00000011636	Uncharacterized protein [Source:UniProtKB/TrEMBL;Acc:F1SLB0]	gene	overlapping	0	9.39582	26.3291
Chr7:29916917-29921694	7	29916917	29921694	0.021873143	BMP5	ENSSSCG00000001478	bone morphogenetic protein 5 [Source:RefSeq peptide;Acc:NP_001191830]	gene	overlapping	0	1.4483	9.89117
Chr8:133755648-133764790	8	133755648	133764790	0.046723768	BMPR1B	ENSSSCG00000029621	Uncharacterized protein [Source:UniProtKB/TrEMBL;Acc:F1RWW6]	gene	overlapping	0	38.2446	24.35
Chr15:117488826-117496899	15	117488826	117496899	0.020791678	BMPR2	ENSSSCG00000016113	bone morphogenetic protein receptor type-2 [Source:RefSeq peptide;Acc:NP_001191829]	gene	overlapping	0	14.4037	30.5846
Chr1:229934174-229946023	1	229934174	229946023	0.018153014	BNC2	ENSSSCG00000025613	Uncharacterized protein [Source:UniProtKB/TrEMBL;Acc:F1SNE1]	gene	overlapping	0	26.6053	14.6774
Chr8:8764462-8765679	8	8764462	8765679	0.022384727	BOD1L	ENSSSCG00000008735	Uncharacterized protein [Source:UniProtKB/TrEMBL;Acc:F1S5F9]	gene	overlapping	0	23.5277	54.0598
Chr3:2101490-2107827	3	2101490	2107827	0.017498374	BRAT1	ENSSSCG00000007563	BRCA1-associated ATM activator 1 [Source:HGNC Symbol;Acc:21701]	gene	upstream	1310	23.2695	35.4211
Chr1:307495714-307496657	1	307495714	307496657	0.023961807	BRD3	ENSSSCG00000005749	bromodomain containing 3 [Source:HGNC Symbol;Acc:1104]	gene	overlapping	0	22.698	41.0157
Chr7:38948566-38950875	7	38948566	38950875	0.020464847	BTBD9	ENSSSCG00000030073	BTB (POZ) domain containing 9 [Source:RefSeq peptide;Acc:NP_001230232]	gene	overlapping	0	27.6528	12.5542
Chr14:79535400-79539366	14	79535400	79539366	0.02786779	C10ORF27	ENSSSCG00000010273	Uncharacterized protein [Source:UniProtKB/TrEMBL;Acc:F1SUB4]	gene	overlapping	0	14.0831	26.103
Chr10:57389859-57396181	10	57389859	57396181	0.0160501	C10orf67	ENSSSCG00000021093	chromosome 10 open reading frame 67 [Source:HGNC Symbol;Acc:28716]	gene	overlapping	0	17.9329	8.97275
Chr14:147504612-147507612	14	147504612	147507612	0.03157904	C10ORF90	ENSSSCG00000010747	Uncharacterized protein [Source:UniProtKB/TrEMBL;Acc:F1SDM2]	gene	overlapping	0	9.88266	22.003
Chr2:29660099-29663984	2	29660099	29663984	0.018432878	C11ORF41	ENSSSCG00000013311	Uncharacterized protein [Source:UniProtKB/TrEMBL;Acc:F1SGR4]	gene	overlapping	0	16.0733	4.74836
Chr2:45431516-45443288	2	45431516	45443288	0.022450028	C11ORF58	ENSSSCG00000013383	Uncharacterized protein [Source:UniProtKB/TrEMBL;Acc:F1S994]	gene	overlapping	0	28.8225	45.0668
Chr5:73747333-73766465	5	73747333	73766465	0.038047798	C12ORF40	ENSSSCG00000000782	Uncharacterized protein [Source:UniProtKB/TrEMBL;Acc:F1SHQ0]	gene	overlapping	0	9.11345	26.7892
Chr14:37926507-37934987	14	37926507	37934987	0.014645071	C12ORF49	ENSSSCG00000009863	Uncharacterized protein [Source:UniProtKB/TrEMBL;Acc:F1RKE3]	gene	upstream	213	12.3775	19.4448
Chr1:206501671-206510587	1	206501671	206510587	0.027432026	C14ORF101	ENSSSCG00000005062	Uncharacterized protein [Source:UniProtKB/TrEMBL;Acc:F1SSM4]	gene	overlapping	0	24.8618	10.137
Chr7:118630112-118634090	7	118630112	118634090	0.017561477	C14ORF102	ENSSSCG00000002434	Uncharacterized protein [Source:UniProtKB/TrEMBL;Acc:F1SDA5]	gene	overlapping	0	20.5217	7.97198
Chr7:130889469-130891122	7	130889469	130891122	0.017561477	C14ORF153	ENSSSCG00000002547	Uncharacterized protein [Source:UniProtKB/TrEMBL;Acc:F1S9W8]	gene	overlapping	0	39.338	20.6081
Chr7:131024249-131026542	7	131024249	131026542	0.017803876	C14ORF2	ENSSSCG00000002550	Uncharacterized protein [Source:UniProtKB/TrEMBL;Acc:F1S9V7]	gene	upstream	1498	30.2686	54.6064
Chr3:38711326-38712947	3	38711326	38712947	0.01943112	C16ORF71	ENSSSCG00000007935	Uncharacterized protein [Source:UniProtKB/TrEMBL;Acc:F1RK72]	gene	upstream	923	10.5802	23.2273
Chr12:6289149-6292320	12	6289149	6292320	0.03645652	C17ORF28	ENSSSCG00000017219	Uncharacterized protein [Source:UniProtKB/TrEMBL;Acc:F1RVV6]	gene	overlapping	0	25.5722	13.3946
Chr12:41246671-41250453	12	41246671	41250453	0.014645071	C17ORF66	ENSSSCG00000017706	Uncharacterized protein [Source:UniProtKB/TrEMBL;Acc:F1S188]	gene	overlapping	0	22.8982	9.71097
Chr12:44365122-44371399	12	44365122	44371399	0.014645071	C17ORF75	ENSSSCG00000017733	protein Njmu-R1 [Source:RefSeq peptide;Acc:NP_001182049]	gene	downstream	624	19.3902	4.69138
Chr12:53807192-53810917	12	53807192	53810917	0.027261313	C17ORF87	ENSSSCG00000017896	Uncharacterized protein [Source:UniProtKB/TrEMBL;Acc:F1RGL6]	gene	overlapping	0	27.5064	10.9181
Chr6:89780023-89782661	6	89780023	89782661	0.02204649	C18orf1	ENSSSCG00000027417	chromosome 18 open reading frame 1 [Source:HGNC Symbol;Acc:1224]	gene	overlapping	0	10.1416	23.9526
Chr6:146682769-146690863	6	146682769	146690863	0.016191395	C1orf123	ENSSSCG00000003850	chromosome 1 open reading frame 123 [Source:HGNC Symbol;Acc:26059]	gene	upstream	580	22.7534	43.2024
Chr9:138153742-138159982	9	138153742	138159982	0.021760844	C1ORF21	ENSSSCG00000015565	Uncharacterized protein [Source:UniProtKB/TrEMBL;Acc:F1S3P0]	gene	overlapping	0	12.3704	30.423
Chr6:139681621-139698655	6	139681621	139698655	0.025642427	C1ORF87	ENSSSCG00000003823	Uncharacterized protein [Source:UniProtKB/TrEMBL;Acc:F1S7Z1]	gene	overlapping	0	14.4916	26.8645
Chr17:36668676-36680734	17	36668676	36680734	0.014645071	C20ORF194	ENSSSCG00000007155	Uncharacterized protein [Source:UniProtKB/TrEMBL;Acc:F1S8B5]	gene	overlapping	0	17.0291	36.9819
Chr17:44916207-44922542	17	44916207	44922542	0.014989286	C20ORF4	ENSSSCG00000007315	Uncharacterized protein [Source:UniProtKB/TrEMBL;Acc:F1S484]	gene	overlapping	0	12.5536	28.949
Chr13:192540533-192548701	13	192540533	192548701	0.02220902	C21orf91	ENSSSCG00000021429	chromosome 21 open reading frame 91 [Source:HGNC Symbol;Acc:16459]	gene	overlapping	0	4.69258	21.7659
Chr13:215616303-215618753	13	215616303	215618753	0.023779	C2CD2	ENSSSCG00000025821	Uncharacterized protein [Source:UniProtKB/TrEMBL;Acc:F1SG46]	gene	overlapping	0	4.82017	17.4652
Chr15:147323518-147325648	15	147323518	147325648	0.019000713	C2ORF82	ENSSSCG00000016294	chromosome 2 open reading frame 82 [Source:RefSeq peptide;Acc:NP_001172114]	gene	overlapping	0	16.1743	5.40459
Chr13:149853327-149865816	13	149853327	149865816	0.026738606	C3ORF15	ENSSSCG00000011892	Uncharacterized protein [Source:UniProtKB/TrEMBL;Acc:F1SPB5]	gene	overlapping	0	8.31111	32.7512
Chr13:30489573-30498473	13	30489573	30498473	0.02549097	C3orf23	ENSSSCG00000025739	chromosome 3 open reading frame 23 [Source:HGNC Symbol;Acc:25241]	gene	overlapping	0	23.5272	33.7324
Chr2:147115703-147117663	2	147115703	147117663	0.02255592	C5ORF65	ENSSSCG00000014347	Uncharacterized protein [Source:UniProtKB/TrEMBL;Acc:F1RGH4]	gene	overlapping	0	25.0906	11.9473
Chr1:4764089-4766904	1	4764089	4766904	0.017561477	C6ORF118	ENSSSCG00000004028	Uncharacterized protein [Source:UniProtKB/TrEMBL;Acc:F1SBW5]	gene	overlapping	0	20.6611	3.05693
Chr18:27465924-27474378	18	27465924	27474378	0.016775927	C7ORF58	ENSSSCG00000016618	Uncharacterized protein [Source:UniProtKB/TrEMBL;Acc:F1SJF7]	gene	overlapping	0	7.55388	16.207
Chr14:13012645-13018244	14	13012645	13018244	0.019768845	C8ORF80	ENSSSCG00000009673	Uncharacterized protein [Source:UniProtKB/TrEMBL;Acc:F1RJR4]	gene	overlapping	0	6.42891	18.8624
Chr4:68331101-68338531	4	68331101	68338531	0.017922454	C8ORF84	ENSSSCG00000006183	Uncharacterized protein [Source:UniProtKB/TrEMBL;Acc:F1RWI4]	gene	overlapping	0	9.80087	1.60483
Chr10:33136492-33143055	10	33136492	33143055	0.01762378	C9ORF153	ENSSSCG00000010954	Uncharacterized protein [Source:UniProtKB/TrEMBL;Acc:F1S4I3]	gene	overlapping	0	37.383	19.5115
Chr1:313924915-313926551	1	313924915	313926551	0.03479084	C9ORF86	ENSSSCG00000005841	Uncharacterized protein [Source:UniProtKB/TrEMBL;Acc:F1RVY4]	gene	overlapping	0	27.667	11.6656
Chr14:53200595-53203919	14	53200595	53203919	0.018885214	CABIN1	ENSSSCG00000010062	Uncharacterized protein [Source:UniProtKB/TrEMBL;Acc:F1RL39]	gene	overlapping	0	7.87022	18.6808
Chr6:100719630-100723374	6	100719630	100723374	0.014989286	CABLES1	ENSSSCG00000003705	Uncharacterized protein [Source:UniProtKB/TrEMBL;Acc:F1SBB7]	gene	overlapping	0	16.2486	6.79378
Chr2:66094089-66100640	2	66094089	66100640	0.017495079	CACNA1A	ENSSSCG00000013754	Uncharacterized protein [Source:UniProtKB/TrEMBL;Acc:F1SD80]	gene	overlapping	0	19.5659	8.48118
Chr9:135300017-135304422	9	135300017	135304422	0.015300019	CACNA1E	ENSSSCG00000015543	calcium channel, voltage-dependent, R type, alpha 1E subunit [Source:HGNC Symbol;Acc:1392]	gene	overlapping	0	5.0227	16.043
Chr9:135338837-135344249	9	135338837	135344249	0.017561477	CACNA1E	ENSSSCG00000015543	calcium channel, voltage-dependent, R type, alpha 1E subunit [Source:HGNC Symbol;Acc:1392]	gene	overlapping	0	7.43567	19.8441
Chr6:46292959-46301251	6	46292959	46301251	0.029824207	CADM4	ENSSSCG00000003061	Uncharacterized protein [Source:UniProtKB/TrEMBL;Acc:F1RMV8]	gene	overlapping	0	18.0981	31.3912
Chr18:26129493-26141072	18	26129493	26141072	0.015856734	CADPS2	ENSSSCG00000016611	Uncharacterized protein [Source:UniProtKB/TrEMBL;Acc:F1SLX7]	gene	overlapping	0	24.1298	15.0984
Chr6:47824724-47828842	6	47824724	47828842	0.017561477	CALM1	ENSSSCG00000022545	calmodulin 3 [Source:RefSeq peptide;Acc:NP_001231138]	gene	overlapping	0	21.8027	10.1101
Chr6:58549828-58551539	6	58549828	58551539	0.016737467	CALML6	ENSSSCG00000028926	calmodulin-like 6 [Source:HGNC Symbol;Acc:24193]	gene	downstream	157	11.5702	2.76885
Chr8:117069108-117082933	8	117069108	117082933	0.019130426	CAMK2D	ENSSSCG00000009123	Calcium/calmodulin-dependent protein kinase type II subunit delta [Source:UniProtKB/Swiss-Prot;Acc:Q95266]	gene	overlapping	0	9.65147	28.0118
Chr14:33190290-33193968	14	33190290	33193968	0.03637216	CAMKK2	ENSSSCG00000009815	Uncharacterized protein [Source:UniProtKB/TrEMBL;Acc:F1RNP6]	gene	overlapping	0	7.17639	28.6114
Chr9:12322433-12324358	9	12322433	12324358	0.038211007	CAPN5	ENSSSCG00000014875	Uncharacterized protein [Source:UniProtKB/TrEMBL;Acc:F1SUK6]	gene	overlapping	0	7.68819	22.9205
Chr9:12335150-12337071	9	12335150	12337071	0.018885214	CAPN5	ENSSSCG00000014875	Uncharacterized protein [Source:UniProtKB/TrEMBL;Acc:F1SUK6]	gene	overlapping	0	1.72155	14.5117
Chr2:29229410-29235604	2	29229410	29235604	0.023947475	CAPRIN1	ENSSSCG00000013305	Uncharacterized protein [Source:UniProtKB/TrEMBL;Acc:F1SGS6]	gene	overlapping	0	12.8882	24.4352
Chr16:22379499-22386981	16	22379499	22386981	0.02093628	CAPSL	ENSSSCG00000016833	Uncharacterized protein [Source:UniProtKB/TrEMBL;Acc:F1SNB9]	gene	overlapping	0	7.86442	19.0593
Chr11:84758114-84759678	11	84758114	84759678	0.023997659	CARS2	ENSSSCG00000029424	Uncharacterized protein [Source:UniProtKB/TrEMBL;Acc:F1RLL6]	gene	overlapping	0	18.7728	7.76022
Chr1:167193409-167197714	1	167193409	167197714	0.014645071	CBLN2	ENSSSCG00000020859	Cerebellin 2; Uncharacterized protein [Source:UniProtKB/TrEMBL;Acc:F1SNL1]	gene	overlapping	0	3.3581	11.4032
Chr13:209838010-209842823	13	209838010	209842823	0.015837569	CBR3	ENSSSCG00000012053	Uncharacterized protein [Source:UniProtKB/TrEMBL;Acc:F1SGX4]	gene	overlapping	0	2.60271	10.1452
Chr13:209845436-209851434	13	209845436	209851434	0.015965132	CBR3	ENSSSCG00000012053	Uncharacterized protein [Source:UniProtKB/TrEMBL;Acc:F1SGX4]	gene	overlapping	0	10.0155	2.04301
Chr5:6367201-6369150	5	6367201	6369150	0.046088625	CBX7	ENSSSCG00000000090	Uncharacterized protein [Source:UniProtKB/TrEMBL;Acc:F1SNY1]	gene	overlapping	0	8.16752	19.2949
Chr2:80503994-80511730	2	80503994	80511730	0.020895122	CBY3	ENSSSCG00000014021	Uncharacterized protein [Source:UniProtKB/TrEMBL;Acc:F1S440]	gene	upstream	1678	18.319	6.9135
Chr4:139704301-139707661	4	139704301	139707661	0.015965132	CCBL2	ENSSSCG00000006925	Uncharacterized protein [Source:UniProtKB/TrEMBL;Acc:F1S4D5]	gene	overlapping	0	22.0757	8.34794
Chr6:17432157-17434093	6	17432157	17434093	0.025081122	CCDC102A	ENSSSCG00000028723	coiled-coil domain containing 102A [Source:HGNC Symbol;Acc:28097]	gene	overlapping	0	15.9382	28.93
Chr2:124359008-124367933	2	124359008	124367933	0.019102953	CCDC112	ENSSSCG00000029866	coiled-coil domain containing 112 [Source:HGNC Symbol;Acc:28599]	gene	overlapping	0	8.12499	18.9691
Chr7:119526050-119527898	7	119526050	119527898	0.023413727	CCDC88C	ENSSSCG00000002440	Uncharacterized protein [Source:UniProtKB/TrEMBL;Acc:F1SD91]	gene	overlapping	0	8.78029	22.5487
Chr18:55240259-55242331	18	55240259	55242331	0.022654241	CCM2	ENSSSCG00000016734	Uncharacterized protein [Source:UniProtKB/TrEMBL;Acc:F1ST61]	gene	overlapping	0	18.2679	30.1162
Chr18:55257915-55259811	18	55257915	55259811	0.01954431	CCM2	ENSSSCG00000016734	Uncharacterized protein [Source:UniProtKB/TrEMBL;Acc:F1ST61]	gene	overlapping	0	13.6088	31.4164
Chr7:128111956-128115491	7	128111956	128115491	0.031705372	CCNK	ENSSSCG00000002509	Uncharacterized protein [Source:UniProtKB/TrEMBL;Acc:F1SAQ3]	gene	overlapping	0	8.56442	21.7985
Chr10:63636166-63638491	10	63636166	63638491	0.018885214	CCNY	ENSSSCG00000011107	cyclin-Y [Source:RefSeq peptide;Acc:NP_001231317]	gene	overlapping	0	26.8927	8.23929
Chr1:103220793-103231152	1	103220793	103231152	0.01762378	CD109	ENSSSCG00000004485	Uncharacterized protein [Source:UniProtKB/TrEMBL;Acc:F1RQH9]	gene	overlapping	0	16.2844	7.5604
Chr2:29777750-29782880	2	29777750	29782880	0.015965132	CD59	ENSSSCG00000024791	CD59 glycoprotein [Source:UniProtKB/Swiss-Prot;Acc:O62680]	gene	overlapping	0	19.5169	9.34886
Chr3:60666485-60671424	3	60666485	60671424	0.017237658	CD8B	ENSSSCG00000008213	T-cell surface glycoprotein CD8 beta chain [Source:RefSeq peptide;Acc:NP_998927]	gene	overlapping	0	8.74972	18.6896
ChrX:140099114-140101336	X	140099114	140101336	0.020869285	CD99L2	ENSSSCG00000012744	Uncharacterized protein [Source:UniProtKB/TrEMBL;Acc:F1RQ20]	gene	overlapping	0	8.50659	25.5716
Chr10:65502972-65506382	10	65502972	65506382	0.021231666	CDC123	ENSSSCG00000011112	cell division cycle 123 homolog [Source:RefSeq peptide;Acc:NP_001230752]	gene	overlapping	0	10.5985	26.8264
Chr7:128836743-128837911	7	128836743	128837911	0.020794302	CDC42BPB	ENSSSCG00000002523	Uncharacterized protein [Source:UniProtKB/TrEMBL;Acc:F1SAM8]	gene	overlapping	0	44.5349	22.3401
Chr10:2283560-2288604	10	2283560	2288604	0.017917557	CDC73	ENSSSCG00000010801	Uncharacterized protein [Source:UniProtKB/TrEMBL;Acc:F1SAB0]	gene	overlapping	0	7.68822	27.6693
Chr15:88760189-88765329	15	88760189	88765329	0.038395938	CDCA7	ENSSSCG00000015961	cell division cycle associated 7 [Source:HGNC Symbol;Acc:14628]	gene	overlapping	0	22.0741	11.9445
Chr13:31181095-31188165	13	31181095	31188165	0.014989286	CDCP1	ENSSSCG00000011298	Uncharacterized protein [Source:UniProtKB/TrEMBL;Acc:F1SRC9]	gene	overlapping	0	17.6753	27.1004
Chr6:5258624-5264462	6	5258624	5264462	0.02568628	CDH13	ENSSSCG00000002684	cadherin-13 [Source:RefSeq peptide;Acc:NP_001103415]	gene	overlapping	0	23.9704	9.32158
Chr14:80415021-80419061	14	80415021	80419061	0.014989286	CDH23	ENSSSCG00000010278	Uncharacterized protein [Source:UniProtKB/TrEMBL;Acc:F1SUA7]	gene	overlapping	0	28.0829	15.6446
Chr17:68967937-68969493	17	68967937	68969493	0.04058253	CDH4	ENSSSCG00000025784	cadherin 4, type 1, R-cadherin (retinal) [Source:HGNC Symbol;Acc:1763]	gene	overlapping	0	13.01	35.3669
Chr16:18478333-18483840	16	18478333	18483840	0.015160902	CDH6	ENSSSCG00000016806	Uncharacterized protein [Source:UniProtKB/TrEMBL;Acc:F1SP42]	gene	overlapping	0	8.25853	21.1444
Chr6:460606-462296	6	460606	462296	0.02268965	CDK10	ENSSSCG00000025401	cell division protein kinase 10 [Source:RefSeq peptide;Acc:NP_001137176]	gene	overlapping	0	11.8617	29.2222
Chr6:58238766-58239641	6	58238766	58239641	0.030747019	CDK11A	ENSSSCG00000003352	cyclin-dependent kinase 11A [Source:HGNC Symbol;Acc:1730]	gene	overlapping	0	50.2806	32.6219
Chr16:51331334-51338463	16	51331334	51338463	0.021252168	CDK7	ENSSSCG00000016961	cell division protein kinase 7 [Source:RefSeq peptide;Acc:NP_001159786]	gene	overlapping	0	26.7118	9.81541
Chr17:15181023-15186841	17	15181023	15186841	0.017762743	CDS2	ENSSSCG00000030123	phosphatidate cytidylyltransferase 2 [Source:RefSeq peptide;Acc:NP_001160145]	gene	overlapping	0	20.8768	8.37725
Chr6:7695727-7698572	6	7695727	7698572	0.033740245	CDYL2	ENSSSCG00000027458	chromodomain protein, Y-like 2 [Source:HGNC Symbol;Acc:23030]	gene	overlapping	0	25.8756	38.4487
Chr5:72005087-72007907	5	72005087	72007907	0.017742276	CECR2	ENSSSCG00000000766	Uncharacterized protein [Source:UniProtKB/TrEMBL;Acc:F1SHR4]	gene	overlapping	0	11.5092	22.0316
Chr4:119460091-119465994	4	119460091	119465994	0.011869259	CEPT1	ENSSSCG00000029918	choline/ethanolamine phosphotransferase 1 [Source:HGNC Symbol;Acc:24289]	gene	overlapping	0	18.2624	7.09635
Chr18:17122035-17130587	18	17122035	17130587	0.017647086	CHCHD3	ENSSSCG00000016545	coiled-coil-helix-coiled-coil-helix domain-containing protein 3, mitochondrial [Source:RefSeq peptide;Acc:NP_001231105]	gene	overlapping	0	15.5611	29.7615
Chr7:92002837-92018384	7	92002837	92018384	0.03370159	CHD2	ENSSSCG00000002266	Uncharacterized protein [Source:UniProtKB/TrEMBL;Acc:F1SA77]	gene	downstream	246	4.23548	13.6147
Chr12:55507715-55511035	12	55507715	55511035	0.017561477	CHD3	ENSSSCG00000021363	chromodomain helicase DNA binding protein 3 [Source:HGNC Symbol;Acc:1918]	gene	overlapping	0	28.5408	14.1741
Chr4:79103766-79106820	4	79103766	79106820	0.049586948	CHD7	ENSSSCG00000006231	Uncharacterized protein [Source:UniProtKB/TrEMBL;Acc:F1RT88]	gene	overlapping	0	15.6651	31.7989
Chr9:125382688-125390321	9	125382688	125390321	0.01762378	CHIT1	ENSSSCG00000015477	Uncharacterized protein [Source:UniProtKB/TrEMBL;Acc:F1S7U2]	gene	overlapping	0	9.07596	26.6507
Chr9:125395833-125404959	9	125395833	125404959	0.017498374	CHIT1	ENSSSCG00000015477	Uncharacterized protein [Source:UniProtKB/TrEMBL;Acc:F1S7U2]	gene	overlapping	0	21.6723	7.23348
Chr6:484020-485241	6	484020	485241	0.022654241	CHMP1A	ENSSSCG00000023677	chromatin modifying protein 1A [Source:RefSeq peptide;Acc:NP_001230289]	gene	overlapping	0	25.7572	14.4963
Chr12:1598852-1599945	12	1598852	1599945	0.02152634	CHMP6	ENSSSCG00000017140	Uncharacterized protein [Source:UniProtKB/TrEMBL;Acc:F1RZY6]	gene	overlapping	0	19.7077	31.9819
Chr18:47656964-47661407	18	47656964	47661407	0.022372495	CHN2	ENSSSCG00000016687	Uncharacterized protein [Source:UniProtKB/TrEMBL;Acc:F1SIG4]	gene	overlapping	0	8.84477	23.6276
Chr9:7191940-7193035	9	7191940	7193035	0.04337624	CHRNA10	ENSSSCG00000014796	Uncharacterized protein [Source:UniProtKB/TrEMBL;Acc:F1SUZ0]	gene	overlapping	0	16.4133	33.32
Chr5:83299143-83303540	5	83299143	83303540	0.032405227	CHST11	ENSSSCG00000000837	Uncharacterized protein [Source:UniProtKB/TrEMBL;Acc:F1SG44]	gene	overlapping	0	13.9942	24.228
Chr5:83416176-83418935	5	83416176	83418935	0.01943112	CHST11	ENSSSCG00000000837	Uncharacterized protein [Source:UniProtKB/TrEMBL;Acc:F1SG44]	gene	overlapping	0	11.0235	24.6434
Chr14:145113356-145115702	14	145113356	145115702	0.021162666	CHST15	ENSSSCG00000029482	carbohydrate (N-acetylgalactosamine 4-sulfate 6-O) sulfotransferase 15 [Source:HGNC Symbol;Acc:18137]	gene	overlapping	0	5.37366	18.3585
Chr6:14028811-14034260	6	14028811	14034260	0.029733902	CHST4	ENSSSCG00000002737	Uncharacterized protein [Source:UniProtKB/TrEMBL;Acc:F1S3D0]	gene	overlapping	0	29.81	15.035
Chr7:129378297-129382371	7	129378297	129382371	0.018323988	CINP	ENSSSCG00000002530	cyclin-dependent kinase 2 interacting protein [Source:HGNC Symbol;Acc:23789]	gene	overlapping	0	13.2247	3.24345
Chr1:302626924-302630791	1	302626924	302630791	0.017561477	CIZ1	ENSSSCG00000005640	Uncharacterized protein [Source:UniProtKB/TrEMBL;Acc:F1RRW9]	gene	overlapping	0	21.6398	10.906
Chr18:7149333-7152635	18	7149333	7152635	0.032495283	CLCN1	ENSSSCG00000016462	chloride channel, voltage-sensitive 1 [Source:HGNC Symbol;Acc:2019]	gene	overlapping	0	20.3764	7.24692
Chr18:7180308-7182878	18	7180308	7182878	0.025238778	CLCN1	ENSSSCG00000016462	chloride channel, voltage-sensitive 1 [Source:HGNC Symbol;Acc:2019]	gene	overlapping	0	21.214	5.77771
ChrX:7383400-7385254	X	7383400	7385254	0.024757046	CLCN4	ENSSSCG00000024809	chloride channel, voltage-sensitive 4 [Source:HGNC Symbol;Acc:2022]	gene	overlapping	0	18.8651	33.5932
ChrX:7396878-7398239	X	7396878	7398239	0.040057503	CLCN4	ENSSSCG00000024809	chloride channel, voltage-sensitive 4 [Source:HGNC Symbol;Acc:2022]	gene	overlapping	0	18.2207	37.244
ChrX:7412155-7414604	X	7412155	7414604	0.026296327	CLCN4	ENSSSCG00000024809	chloride channel, voltage-sensitive 4 [Source:HGNC Symbol;Acc:2022]	gene	overlapping	0	11.2688	33.5727
ChrX:48736029-48740104	X	48736029	48740104	0.018824909	CLCN5	ENSSSCG00000023026	H(+)/Cl(-) exchange transporter 5 [Source:UniProtKB/Swiss-Prot;Acc:Q9GKE7]	gene	overlapping	0	20.4715	29.5296
Chr6:65821007-65823542	6	65821007	65823542	0.01618038	CLCN6	ENSSSCG00000003429	Uncharacterized protein [Source:UniProtKB/TrEMBL;Acc:F1RF80]	gene	overlapping	0	11.3847	19.744
Chr13:31105667-31109931	13	31105667	31109931	0.019688742	CLEC3B	ENSSSCG00000011299	Uncharacterized protein [Source:UniProtKB/TrEMBL;Acc:F1SRC8]	gene	overlapping	0	14.2135	30.9252
ChrX:142881716-142885449	X	142881716	142885449	0.015419697	CLIC2	ENSSSCG00000012808	chloride intracellular channel protein 2 [Source:RefSeq peptide;Acc:NP_001231357]	gene	overlapping	0	9.80166	1.06916
Chr7:123778657-123782082	7	123778657	123782082	0.017803876	CLMN	ENSSSCG00000002494	calmin (calponin-like, transmembrane) [Source:RefSeq peptide;Acc:NP_001230811]	gene	overlapping	0	17.4405	9.4324
Chr9:7606667-7607758	9	7606667	7607758	0.049627025	CLPB	ENSSSCG00000025600	Uncharacterized protein [Source:UniProtKB/TrEMBL;Acc:F1SUV5]	gene	overlapping	0	32.1044	15.1784
Chr4:78526620-78534563	4	78526620	78534563	0.017803876	CLVS1	ENSSSCG00000006230	Uncharacterized protein [Source:UniProtKB/TrEMBL;Acc:F1RT89]	gene	overlapping	0	15.5682	4.12166
Chr4:78565747-78579850	4	78565747	78579850	0.024726998	CLVS1	ENSSSCG00000006230	Uncharacterized protein [Source:UniProtKB/TrEMBL;Acc:F1RT89]	gene	overlapping	0	20.4511	7.4014
Chr13:20287074-20293778	13	20287074	20293778	0.014645071	CMTM6	ENSSSCG00000021223	Uncharacterized protein [Source:UniProtKB/TrEMBL;Acc:F1RRE1]	gene	overlapping	0	12.8495	4.68505
Chr13:20439032-20445454	13	20439032	20445454	0.020179864	CMTM8	ENSSSCG00000022618	CKLF-like MARVEL transmembrane domain containing 8 [Source:HGNC Symbol;Acc:19179]	gene	overlapping	0	4.90579	16.2925
Chr2:90199496-90211823	2	90199496	90211823	0.021370606	CMYA5	ENSSSCG00000026098	cardiomyopathy-associated protein 5 [Source:RefSeq peptide;Acc:NP_001184236]	gene	overlapping	0	23.839	11.1172
Chr1:165532303-165535922	1	165532303	165535922	0.020191148	CNDP2	ENSSSCG00000004870	cytosolic non-specific dipeptidase [Source:RefSeq peptide;Acc:NP_001230636]	gene	overlapping	0	5.3841	19.2382
Chr6:17804123-17806643	6	17804123	17806643	0.0332777	CNGB1	ENSSSCG00000002811	Uncharacterized protein [Source:UniProtKB/TrEMBL;Acc:F1RF40]	gene	overlapping	0	22.9928	9.43006
Chr10:15359984-15363483	10	15359984	15363483	0.029797308	CNIH3	ENSSSCG00000028881	cornichon homolog 3 (Drosophila) [Source:HGNC Symbol;Acc:26802]	gene	overlapping	0	14.9018	4.28831
Chr12:21049394-21050768	12	21049394	21050768	0.020869285	CNP	ENSSSCG00000017420	Uncharacterized protein [Source:UniProtKB/TrEMBL;Acc:F1S0P3]	gene	overlapping	0	28.0986	14.5968
Chr10:36365642-36368983	10	36365642	36368983	0.027254827	CNTFR	ENSSSCG00000010974	ciliary neurotrophic factor receptor [Source:HGNC Symbol;Acc:2170]	gene	overlapping	0	4.25169	14.155
Chr10:36373384-36376182	10	36373384	36376182	0.029614635	CNTFR	ENSSSCG00000010974	ciliary neurotrophic factor receptor [Source:HGNC Symbol;Acc:2170]	gene	overlapping	0	15.1235	4.34528
Chr12:55551687-55554537	12	55551687	55554537	0.016239073	CNTROB	ENSSSCG00000017968	Uncharacterized protein [Source:UniProtKB/TrEMBL;Acc:F1ST09]	gene	overlapping	0	14.644	24.2077
Chr1:56216833-56229834	1	56216833	56229834	0.015634118	COL19A1	ENSSSCG00000004273	Uncharacterized protein [Source:UniProtKB/TrEMBL;Acc:F1RTT4]	gene	overlapping	0	9.23723	17.861
Chr11:84399613-84401014	11	84399613	84401014	0.026774155	COL4A1	ENSSSCG00000009544	Uncharacterized protein [Source:UniProtKB/TrEMBL;Acc:F1RLM1]	gene	overlapping	0	16.5159	6.84995
Chr15:142339367-142346850	15	142339367	142346850	0.03358028	COL4A4	ENSSSCG00000016244	collagen, type IV, alpha 4 [Source:HGNC Symbol;Acc:2206]	gene	overlapping	0	12.8583	25.1338
Chr15:142371235-142375713	15	142371235	142375713	0.017422765	COL4A4	ENSSSCG00000016244	collagen, type IV, alpha 4 [Source:HGNC Symbol;Acc:2206]	gene	overlapping	0	27.2049	12.6827
Chr1:307836609-307838471	1	307836609	307838471	0.020790659	COL5A1	ENSSSCG00000005750	Collagen type 5 alpha 1 [Source:UniProtKB/TrEMBL;Acc:Q8HYS4]	gene	overlapping	0	19.0609	9.1528
Chr1:308128080-308129626	1	308128080	308129626	0.021860613	COL5A1	ENSSSCG00000005751	collagen alpha-1(V) chain [Source:RefSeq peptide;Acc:NP_001014971]	gene	overlapping	0	13.8699	24.5765
Chr13:1854202-1862810	13	1854202	1862810	0.017917557	COL6A5	ENSSSCG00000011186	Uncharacterized protein [Source:UniProtKB/TrEMBL;Acc:F1RS99]	gene	overlapping	0	26.1472	10.4873
Chr13:1869253-1878154	13	1869253	1878154	0.017561477	COL6A5	ENSSSCG00000011186	Uncharacterized protein [Source:UniProtKB/TrEMBL;Acc:F1RS99]	gene	overlapping	0	24.4708	8.67269
Chr13:34529708-34532838	13	34529708	34532838	0.025948836	COL7A1	ENSSSCG00000011355	Uncharacterized protein [Source:UniProtKB/TrEMBL;Acc:F1SKM1]	gene	overlapping	0	16.6241	27.2835
Chr13:87903243-87913742	13	87903243	87913742	0.017561477	COPB2	ENSSSCG00000011662	Uncharacterized protein [Source:UniProtKB/TrEMBL;Acc:F1SL54]	gene	overlapping	0	26.1772	13.5018
Chr15:146209345-146264784	15	146209345	146264784	0.014989286	COPS7B	ENSSSCG00000022392	Uncharacterized protein [Source:UniProtKB/TrEMBL;Acc:F1SMV1]	gene	overlapping	0	15.1839	5.45936
Chr8:39630764-39640010	8	39630764	39640010	0.028238835	CORIN	ENSSSCG00000008813	Uncharacterized protein [Source:UniProtKB/TrEMBL;Acc:F1S3S5]	gene	overlapping	0	4.6069	19.9418
Chr3:38976999-38982217	3	38976999	38982217	0.017237658	CORO7	ENSSSCG00000007944	Uncharacterized protein [Source:UniProtKB/TrEMBL;Acc:F1RK54]	gene	downstream	981	7.87676	0.899983
Chr12:48615133-48625470	12	48615133	48625470	0.015965132	CPD	ENSSSCG00000017799	Uncharacterized protein [Source:UniProtKB/TrEMBL;Acc:F1RN68]	gene	overlapping	0	8.97424	22.9051
Chr8:45483552-45497695	8	45483552	45497695	0.018119624	CPE	ENSSSCG00000008854	carboxypeptidase E [Source:RefSeq peptide;Acc:NP_001090908]	gene	overlapping	0	11.0902	20.2546
Chr2:9636828-9645183	2	9636828	9645183	0.01618038	CPSF7	ENSSSCG00000013083	Uncharacterized protein [Source:UniProtKB/TrEMBL;Acc:F1RKQ8]	gene	overlapping	0	19.6388	11.0768
Chr2:9645199-9651167	2	9645199	9651167	0.024531916	CPSF7	ENSSSCG00000013083	Uncharacterized protein [Source:UniProtKB/TrEMBL;Acc:F1RKQ8]	gene	overlapping	0	21.8178	9.34285
Chr14:144961402-144968659	14	144961402	144968659	0.019021396	CPXM2	ENSSSCG00000010728	Uncharacterized protein [Source:UniProtKB/TrEMBL;Acc:F1SEC6]	gene	overlapping	0	5.36264	17.3852
Chr3:41724297-41725412	3	41724297	41725412	0.019840408	CRAMP1L	ENSSSCG00000008026	Uncharacterized protein [Source:UniProtKB/TrEMBL;Acc:F1RG01]	gene	overlapping	0	10.4765	24.828
Chr15:122402650-122410163	15	122402650	122410163	0.014645071	CREB1	ENSSSCG00000016138	cyclic AMP-responsive element-binding protein 1 [Source:RefSeq peptide;Acc:NP_001093399]	gene	overlapping	0	2.28122	16.3266
Chr2:17527161-17531244	2	17527161	17531244	0.021539332	CREB3L1	ENSSSCG00000013263	Uncharacterized protein [Source:UniProtKB/TrEMBL;Acc:F1SI98]	gene	overlapping	0	16.3225	7.26389
Chr18:12300086-12305602	18	12300086	12305602	0.020079851	CREB3L2	ENSSSCG00000016520	Uncharacterized protein [Source:UniProtKB/TrEMBL;Acc:F1SNJ4]	gene	overlapping	0	18.2594	6.87015
Chr3:39560872-39562925	3	39560872	39562925	0.032495283	CREBBP	ENSSSCG00000007951	CREB binding protein [Source:HGNC Symbol;Acc:2348]	gene	overlapping	0	8.31038	26.2748
Chr16:55458227-55467180	16	55458227	55467180	0.014597619	CREBRF	ENSSSCG00000016986	CREB3 regulatory factor [Source:HGNC Symbol;Acc:24050]	gene	overlapping	0	17.7311	9.23947
Chr3:110453650-110463658	3	110453650	110463658	0.032378875	CRIM1	ENSSSCG00000008504	Uncharacterized protein [Source:UniProtKB/TrEMBL;Acc:F1S412]	gene	overlapping	0	5.68756	18.097
Chr17:15983162-15993850	17	15983162	15993850	0.019102953	CRLS1	ENSSSCG00000007048	Uncharacterized protein [Source:UniProtKB/TrEMBL;Acc:F1SBM0]	gene	overlapping	0	11.2626	21.8469
Chr6:69894106-69896159	6	69894106	69896159	0.032527484	CROCC	ENSSSCG00000003478	Uncharacterized protein [Source:UniProtKB/TrEMBL;Acc:F1SUS1]	gene	overlapping	0	22.2806	12.2876
Chr11:46184-48915	11	46184	48915	0.016878413	CRYL1	ENSSSCG00000009268	Lambda-crystallin homolog [Source:UniProtKB/Swiss-Prot;Acc:Q8SQ26]	gene	overlapping	0	16.462	29.5964
Chr5:4351725-4354534	5	4351725	4354534	0.015634118	CSDC2	ENSSSCG00000000062	cold shock domain-containing protein C2 [Source:RefSeq peptide;Acc:NP_001230349]	gene	overlapping	0	15.0158	4.56406
Chr17:10051754-10056482	17	10051754	10056482	0.018487137	CSGALNACT1	ENSSSCG00000007005	Uncharacterized protein [Source:UniProtKB/TrEMBL;Acc:F1SE46]	gene	overlapping	0	4.13681	15.3304
Chr17:10153809-10156161	17	10153809	10156161	0.017561477	CSGALNACT1	ENSSSCG00000007005	Uncharacterized protein [Source:UniProtKB/TrEMBL;Acc:F1SE46]	gene	overlapping	0	6.53005	16.7053
Chr15:39512689-39520718	15	39512689	39520718	0.02724096	CSMD1	ENSSSCG00000015748	Uncharacterized protein [Source:UniProtKB/TrEMBL;Acc:F1RVL4]	gene	overlapping	0	10.362	25.6363
Chr6:83899791-83911703	6	83899791	83911703	0.028022364	CSMD2	ENSSSCG00000003622	Uncharacterized protein [Source:UniProtKB/TrEMBL;Acc:F1SV79]	gene	overlapping	0	11.5486	26.0059
Chr12:970042-970852	12	970042	970852	0.020192476	CSNK1D	ENSSSCG00000028897	casein kinase 1, delta [Source:HGNC Symbol;Acc:2452]	gene	upstream	1534	38.8375	26.9695
Chr1:311581810-311584542	1	311581810	311584542	0.018784678	CTDP1	ENSSSCG00000005787	Uncharacterized protein [Source:UniProtKB/TrEMBL;Acc:F1RWS7]	gene	overlapping	0	27.1477	16.9353
Chr4:36565372-36577728	4	36565372	36577728	0.015154423	CTHRC1	ENSSSCG00000006051	Uncharacterized protein [Source:UniProtKB/TrEMBL;Acc:F1S1D2]	gene	upstream	1762	16.9562	26.0608
Chr2:146484734-146489382	2	146484734	146489382	0.01762378	CTNNA1	ENSSSCG00000014339	Uncharacterized protein [Source:UniProtKB/TrEMBL;Acc:F1RGJ2]	gene	overlapping	0	12.3059	21.6836
Chr10:47877380-47884531	10	47877380	47884531	0.028869117	CUBN	ENSSSCG00000011030	cubilin (intrinsic factor-cobalamin receptor) [Source:HGNC Symbol;Acc:2548]	gene	overlapping	0	7.59761	16.1526
Chr9:40566669-40579151	9	40566669	40579151	0.036239337	CUL5	ENSSSCG00000029198	cullin 5 [Source:HGNC Symbol;Acc:2556]	gene	overlapping	0	6.65272	17.824
Chr3:9413086-9414512	3	9413086	9414512	0.017561477	CUX1	ENSSSCG00000007681	Uncharacterized protein [Source:UniProtKB/TrEMBL;Acc:F1RKF9]	gene	overlapping	0	4.74299	16.3206
Chr6:43725968-43729127	6	43725968	43729127	0.017596463	CUZD1	ENSSSCG00000002981	Deleted in malignant brain tumors 1 protein [Source:UniProtKB/Swiss-Prot;Acc:Q4A3R3]	gene	overlapping	0	1.56866	10.8857
Chr6:46000837-46004711	6	46000837	46004711	0.017561477	CXCL17	ENSSSCG00000003048	Uncharacterized protein [Source:UniProtKB/TrEMBL;Acc:F1RMX0]	gene	overlapping	0	6.96184	16.5142
Chr6:46048430-46052115	6	46048430	46052115	0.02801792	CXCL17	ENSSSCG00000003048	Uncharacterized protein [Source:UniProtKB/TrEMBL;Acc:F1RMX0]	gene	overlapping	0	7.89207	25.277
Chr6:44964319-44968465	6	44964319	44968465	0.016239073	CYP2B22	ENSSSCG00000003006	cytochrome P450 2B22 [Source:RefSeq peptide;Acc:NP_999578]	gene	overlapping	0	15.4218	27.4701
Chr6:143034891-143040410	6	143034891	143040410	0.01618038	DAB1	ENSSSCG00000003833	disabled homolog 1 [Source:RefSeq peptide;Acc:NP_001090911]	gene	overlapping	0	10.737	17.6847
Chr11:48435533-48452320	11	48435533	48452320	0.03321566	DACH1	ENSSSCG00000009457	Uncharacterized protein [Source:UniProtKB/TrEMBL;Acc:F1RJ36]	gene	overlapping	0	6.4511	17.2114
Chr1:2458576-2460431	1	2458576	2460431	0.018153014	DACT2	ENSSSCG00000004014	dapper, antagonist of beta-catenin, homolog 2 (Xenopus laevis) [Source:HGNC Symbol;Acc:21231]	gene	upstream	826	19.7487	5.04925
Chr14:44479053-44487593	14	44479053	44487593	0.021393837	DAO	ENSSSCG00000009942	D-amino-acid oxidase [Source:UniProtKB/Swiss-Prot;Acc:P00371]	gene	overlapping	0	6.34256	19.3301
Chr9:37621406-37635833	9	37621406	37635833	0.021496737	DCUN1D5	ENSSSCG00000014989	Uncharacterized protein [Source:UniProtKB/TrEMBL;Acc:F1SV55]	gene	overlapping	0	23.2376	11.0651
ChrX:105851321-105860745	X	105851321	105860745	0.015435163	DCX	ENSSSCG00000012585	Uncharacterized protein [Source:UniProtKB/TrEMBL;Acc:F1RWU2]	gene	overlapping	0	13.7127	2.66422
Chr1:202941229-202950853	1	202941229	202950853	0.02520181	DDHD1	ENSSSCG00000005043	Uncharacterized protein [Source:UniProtKB/TrEMBL;Acc:F1SFE1]	gene	overlapping	0	6.0761	26.2832
Chr6:73129559-73131313	6	73129559	73131313	0.021792548	DDOST	ENSSSCG00000003505	Dolichyl-diphosphooligosaccharide--protein glycosyltransferase 48 kDa subunit [Source:UniProtKB/Swiss-Prot;Acc:Q29381]	gene	overlapping	0	26.0327	36.6263
Chr2:142624237-142631652	2	142624237	142631652	0.017498374	DDX46	ENSSSCG00000026644	DEAD box polypeptide 46 [Source:UniProtKB/TrEMBL;Acc:F8SIP8]	gene	overlapping	0	8.41019	24.7494
Chr6:45645314-45649404	6	45645314	45649404	0.017544737	DEDD2	ENSSSCG00000030182	death effector domain containing 2 [Source:HGNC Symbol;Acc:24450]	gene	overlapping	0	5.72469	20.7501
Chr4:2043224-2044181	4	2043224	2044181	0.040758133	DENND3	ENSSSCG00000025283	Uncharacterized protein [Source:UniProtKB/TrEMBL;Acc:F1RSK6]	gene	overlapping	0	13.6067	28.5075
Chr4:104654671-104656590	4	104654671	104656590	0.01903462	DENND4B	ENSSSCG00000006568	Uncharacterized protein [Source:UniProtKB/TrEMBL;Acc:F1SFW6]	gene	overlapping	0	28.9308	15.3832
Chr16:42458050-42463281	16	42458050	42463281	0.017975029	DEPDC1B	ENSSSCG00000016932	DEP domain containing 1B [Source:HGNC Symbol;Acc:24902]	gene	overlapping	0	8.68338	19.9244
Chr18:12696304-12701143	18	12696304	12701143	0.015634118	DGKI	ENSSSCG00000016521	Uncharacterized protein [Source:UniProtKB/TrEMBL;Acc:F1SNJ3]	gene	overlapping	0	7.66661	22.0254
Chr2:66682832-66686583	2	66682832	66686583	0.014423086	DHPS	ENSSSCG00000013723	Uncharacterized protein [Source:UniProtKB/TrEMBL;Acc:F1SEX8]	gene	overlapping	0	9.54799	17.3312
Chr6:48567057-48568420	6	48567057	48568420	0.015965132	DHX34	ENSSSCG00000003114	Uncharacterized protein [Source:UniProtKB/TrEMBL;Acc:F1RLY9]	gene	overlapping	0	18.9937	38.1787
Chr2:149404613-149407991	2	149404613	149407991	0.015965132	DIAPH1	ENSSSCG00000014387	Uncharacterized protein [Source:UniProtKB/TrEMBL;Acc:F1RMT5]	gene	overlapping	0	28.363	13.8683
Chr5:17084516-17090592	5	17084516	17090592	0.022541583	DIP2B	ENSSSCG00000029196	DIP2 disco-interacting protein 2 homolog B (Drosophila) [Source:HGNC Symbol;Acc:29284]	gene	overlapping	0	22.4938	8.84125
Chr5:17103031-17110234	5	17103031	17110234	0.018237326	DIP2B	ENSSSCG00000029196	DIP2 disco-interacting protein 2 homolog B (Drosophila) [Source:HGNC Symbol;Acc:29284]	gene	overlapping	0	16.7084	4.02676
Chr13:147187600-147200411	13	147187600	147200411	0.020191148	DIRC2	ENSSSCG00000011871	Uncharacterized protein [Source:UniProtKB/TrEMBL;Acc:F1SQ39]	gene	overlapping	0	25.228	15.7855
Chr2:50704858-50709761	2	50704858	50709761	0.017561477	DKK3	ENSSSCG00000013401	dickkopf-related protein 3 [Source:RefSeq peptide;Acc:NP_001034838]	gene	overlapping	0	10.5541	19.1784
ChrX:29528405-29535621	X	29528405	29535621	0.021370606	DMD	ENSSSCG00000012205	Dystrophin [Source:UniProtKB/TrEMBL;Acc:F1SPU7]	gene	overlapping	0	12.0057	33.5766
Chr9:99925264-99937469	9	99925264	99937469	0.01618038	DNAH11	ENSSSCG00000015379	Uncharacterized protein [Source:UniProtKB/TrEMBL;Acc:F1SC07]	gene	overlapping	0	21.8057	9.2516
Chr12:6776285-6778897	12	6776285	6778897	0.017910684	DNAI2	ENSSSCG00000024357	dynein, axonemal, intermediate chain 2 [Source:HGNC Symbol;Acc:18744]	gene	upstream	255	13.3513	2.87375
Chr11:24636575-24645552	11	24636575	24645552	0.015154423	DNAJC15	ENSSSCG00000009427	Uncharacterized protein [Source:UniProtKB/TrEMBL;Acc:F1RJX3]	gene	overlapping	0	21.9568	12.55
Chr2:31828688-31843467	2	31828688	31843467	0.017561477	DNAJC24	ENSSSCG00000026083	Uncharacterized protein [Source:UniProtKB/TrEMBL;Acc:F1SGP4]	gene	overlapping	0	8.72875	22.0039
Chr2:69958340-69963781	2	69958340	69963781	0.0205094	DNM2	ENSSSCG00000013630	Uncharacterized protein [Source:UniProtKB/TrEMBL;Acc:F1S593]	gene	overlapping	0	18.8923	8.38851
Chr11:75007802-75010679	11	75007802	75010679	0.028447896	DOCK9	ENSSSCG00000022112	Uncharacterized protein [Source:UniProtKB/TrEMBL;Acc:F1RP30]	gene	overlapping	0	13.3184	25.5472
Chr8:1858219-1859935	8	1858219	1859935	0.014423086	DOK7	ENSSSCG00000008702	Uncharacterized protein [Source:UniProtKB/TrEMBL;Acc:F1S8M8]	gene	overlapping	0	14.1134	25.8259
Chr2:77054563-77056576	2	77054563	77056576	0.015998911	DOT1L	ENSSSCG00000013457	Uncharacterized protein [Source:UniProtKB/TrEMBL;Acc:F1S8I5]	gene	overlapping	0	30.1314	9.36887
Chr17:58798968-58805187	17	58798968	58805187	0.019579599	DPM1	ENSSSCG00000007474	Dolichol-phosphate mannosyltransferase [Source:UniProtKB/Swiss-Prot;Acc:A5GFZ5]	gene	overlapping	0	2.53973	12.2124
Chr4:89978840-89992888	4	89978840	89992888	0.027820162	DPT	ENSSSCG00000006297	Dermatopontin [Source:UniProtKB/Swiss-Prot;Acc:P45846]	gene	overlapping	0	7.53229	18.1359
Chr4:35607003-35613340	4	35607003	35613340	0.019646203	DPYS	ENSSSCG00000006040	Uncharacterized protein [Source:UniProtKB/TrEMBL;Acc:F1S1E7]	gene	overlapping	0	9.30686	20.6557
Chr13:213717946-213720148	13	213717946	213720148	0.015160902	DSCAM	ENSSSCG00000012072	Uncharacterized protein [Source:UniProtKB/TrEMBL;Acc:F1SGT6]	gene	overlapping	0	7.34429	15.5945
Chr13:213936855-213941597	13	213936855	213941597	0.029408617	DSCAM	ENSSSCG00000012072	Uncharacterized protein [Source:UniProtKB/TrEMBL;Acc:F1SGT6]	gene	overlapping	0	20.9909	4.96661
Chr13:213955356-213961428	13	213955356	213961428	0.017498374	DSCAM	ENSSSCG00000012072	Uncharacterized protein [Source:UniProtKB/TrEMBL;Acc:F1SGT6]	gene	overlapping	0	13.2841	4.8947
Chr9:50157267-50161657	9	50157267	50161657	0.01894107	DSCAML1	ENSSSCG00000015082	Uncharacterized protein [Source:UniProtKB/TrEMBL;Acc:F1SB95]	gene	overlapping	0	9.5914	28.8375
Chr7:4975089-4979630	7	4975089	4979630	0.015634118	DSP	ENSSSCG00000001025	desmoplakin [Source:HGNC Symbol;Acc:3052]	gene	overlapping	0	9.25727	1.02036
Chr7:33639939-33643980	7	33639939	33643980	0.020595957	DST	ENSSSCG00000001499	Uncharacterized protein [Source:UniProtKB/TrEMBL;Acc:F1RZU8]	gene	overlapping	0	29.581	16.3186
Chr17:30336286-30344736	17	30336286	30344736	0.015154423	DTD1	ENSSSCG00000007098	D-tyrosyl-tRNA deacylase 1 homolog (S. cerevisiae) [Source:HGNC Symbol;Acc:16219]	gene	overlapping	0	10.9951	21.4361
Chr17:30405129-30410788	17	30405129	30410788	0.0332777	DTD1	ENSSSCG00000007098	D-tyrosyl-tRNA deacylase 1 homolog (S. cerevisiae) [Source:HGNC Symbol;Acc:16219]	gene	overlapping	0	9.90878	19.4636
Chr3:120296222-120303627	3	120296222	120303627	0.028438974	DTNB	ENSSSCG00000008576	Uncharacterized protein [Source:UniProtKB/TrEMBL;Acc:F1SDL5]	gene	overlapping	0	13.0622	32.6116
Chr3:120364211-120370406	3	120364211	120370406	0.020249968	DTNB	ENSSSCG00000008576	Uncharacterized protein [Source:UniProtKB/TrEMBL;Acc:F1SDL5]	gene	overlapping	0	9.99092	27.0719
Chr7:12202185-12203234	7	12202185	12203234	0.01618038	DTNBP1	ENSSSCG00000001062	dysbindin [Source:RefSeq peptide;Acc:NP_001092070]	gene	overlapping	0	23.1069	44.2887
Chr14:131792175-131799047	14	131792175	131799047	0.019130426	DUSP5	ENSSSCG00000010624	Dual specificity protein phosphatase [Source:UniProtKB/TrEMBL;Acc:F1S5M6]	gene	overlapping	0	14.3148	5.49175
Chr13:37397167-37400383	13	37397167	37400383	0.0205094	DUSP7	ENSSSCG00000011430	Uncharacterized protein [Source:UniProtKB/TrEMBL;Acc:F1SIY1]	gene	overlapping	0	9.11812	25.713
Chr13:20332953-20344010	13	20332953	20344010	0.021281665	DYNC1LI1	ENSSSCG00000011233	Uncharacterized protein [Source:UniProtKB/TrEMBL;Acc:F1RRE0]	gene	downstream	1985	17.5446	32.7962
Chr9:37980234-37999963	9	37980234	37999963	0.018427007	DYNC2H1	ENSSSCG00000014993	dynein, cytoplasmic 2, heavy chain 1 [Source:HGNC Symbol;Acc:2962]	gene	overlapping	0	14.5955	26.3774
Chr2:43172862-43179443	2	43172862	43179443	0.022784486	E2F8	ENSSSCG00000013352	E2F transcription factor 8 [Source:HGNC Symbol;Acc:24727]	gene	overlapping	0	6.80768	23.6163
Chr16:70459278-70468758	16	70459278	70468758	0.016239073	EBF1	ENSSSCG00000017046	Uncharacterized protein [Source:UniProtKB/TrEMBL;Acc:F1RR33]	gene	overlapping	0	10.7947	22.3711
Chr14:150932873-150934326	14	150932873	150934326	0.047687717	EBF3	ENSSSCG00000010757	early B-cell factor 3 [Source:HGNC Symbol;Acc:19087]	gene	upstream	1320	12.0048	32.512
Chr14:151008150-151009658	14	151008150	151009658	0.017498374	EBF3	ENSSSCG00000010757	early B-cell factor 3 [Source:HGNC Symbol;Acc:19087]	gene	overlapping	0	9.25596	22.9749
Chr14:151011281-151012846	14	151011281	151012846	0.02105092	EBF3	ENSSSCG00000010757	early B-cell factor 3 [Source:HGNC Symbol;Acc:19087]	gene	overlapping	0	12.4217	22.125
Chr17:66850027-66852952	17	66850027	66852952	0.01844908	EDN3	ENSSSCG00000007527	Endothelin-3 [Source:UniProtKB/Swiss-Prot;Acc:A5A752]	gene	overlapping	0	18.3835	28.8507
Chr4:1040491-1041250	4	1040491	1041250	0.020706832	EEF1D	ENSSSCG00000006954	Uncharacterized protein [Source:UniProtKB/TrEMBL;Acc:F1SEV8]	gene	overlapping	0	26.086	50.3601
Chr5:2627880-2629319	5	2627880	2629319	0.016239073	EFCAB6	ENSSSCG00000000028	EF-hand calcium binding domain 6 [Source:HGNC Symbol;Acc:24204]	gene	overlapping	0	4.24505	17.4978
Chr6:137291611-137313193	6	137291611	137313193	0.028878693	EFCAB7	ENSSSCG00000003814	Uncharacterized protein [Source:UniProtKB/TrEMBL;Acc:F1S812]	gene	overlapping	0	24.3178	9.74837
Chr3:90193707-90206527	3	90193707	90206527	0.022784486	EFEMP1	ENSSSCG00000008397	EGF-containing fibulin-like extracellular matrix protein 1 [Source:RefSeq peptide;Acc:NP_001231190]	gene	overlapping	0	25.8951	12.3624
Chr7:81013005-81018429	7	81013005	81018429	0.017561477	EFS	ENSSSCG00000002026	embryonal Fyn-associated substrate [Source:HGNC Symbol;Acc:16898]	gene	overlapping	0	11.804	4.17866
Chr2:6439235-6441267	2	6439235	6441267	0.04270154	EHD1	ENSSSCG00000013017	Uncharacterized protein [Source:UniProtKB/TrEMBL;Acc:F1RQR4]	gene	overlapping	0	10.3042	27.518
Chr8:130636279-130642737	8	130636279	130642737	0.014645071	EIF4E	ENSSSCG00000028420	Uncharacterized protein [Source:UniProtKB/TrEMBL;Acc:F1S0B9]	gene	overlapping	0	21.8421	9.38246
Chr12:60112847-60114458	12	60112847	60114458	0.047574934	ELAC2	ENSSSCG00000028465	elaC homolog 2 [Source:RefSeq peptide;Acc:NP_001230145]	gene	overlapping	0	31.1351	18.4497
Chr17:54176769-54178956	17	54176769	54178956	0.016852178	ELMO2	ENSSSCG00000023306	engulfment and cell motility 2 [Source:HGNC Symbol;Acc:17233]	gene	overlapping	0	11.9383	23.6181
Chr7:8008089-8010334	7	8008089	8010334	0.015965132	ELOVL2	ENSSSCG00000001045	Uncharacterized protein [Source:UniProtKB/TrEMBL;Acc:F1RV87]	gene	overlapping	0	14.1901	22.5192
Chr8:120174599-120181029	8	120174599	120181029	0.022784486	ELOVL6	ENSSSCG00000025541	ELOVL fatty acid elongase 6 [Source:HGNC Symbol;Acc:15829]	gene	overlapping	0	7.70835	26.8053
Chr3:41654294-41656109	3	41654294	41656109	0.021041155	EME2	ENSSSCG00000021467	essential meiotic endonuclease 1 homolog 2 (S. pombe) [Source:HGNC Symbol;Acc:27289]	gene	overlapping	0	15.7058	27.1823
Chr14:49330474-49334913	14	49330474	49334913	0.019837532	EMID1	ENSSSCG00000009975	EMI domain containing 1 [Source:HGNC Symbol;Acc:18036]	gene	overlapping	0	9.59845	26.34
Chr2:8479688-8482751	2	8479688	8482751	0.036943026	EML3	ENSSSCG00000013061	echinoderm microtubule associated protein like 3 [Source:HGNC Symbol;Acc:26666]	gene	overlapping	0	20.1571	6.96861
Chr8:145147785-145150325	8	145147785	145150325	0.01606179	ENOPH1	ENSSSCG00000009246	enolase-phosphatase 1 [Source:RefSeq peptide;Acc:NP_001230759]	gene	overlapping	0	4.79248	14.8719
Chr18:6588710-6592328	18	6588710	6592328	0.014989286	ENOS	ENSSSCG00000016450	Nitric oxide synthase, endothelial [Source:UniProtKB/Swiss-Prot;Acc:Q28969]	gene	overlapping	0	21.9376	13.3471
Chr11:24438513-24446892	11	24438513	24446892	0.017603366	ENOX1	ENSSSCG00000021818	ecto-NOX disulfide-thiol exchanger 1 [Source:HGNC Symbol;Acc:25474]	gene	overlapping	0	13.7932	24.3109
Chr5:1496585-1498218	5	1496585	1498218	0.015593054	ENSSSCG00000000018	ENSSSCG00000000018	Uncharacterized protein [Source:UniProtKB/TrEMBL;Acc:F1SJW2]	gene	overlapping	0	24.5707	7.87279
Chr5:84371679-84378801	5	84371679	84378801	0.017561477	ENSSSCG00000000854	ENSSSCG00000000854	No description	gene	overlapping	0	6.24903	20.3105
Chr7:9953982-9955841	7	9953982	9955841	0.028943958	ENSSSCG00000001052	ENSSSCG00000001052	Uncharacterized protein [Source:UniProtKB/TrEMBL;Acc:F1RV81]	gene	overlapping	0	28.6793	43.1067
Chr7:52291234-52296699	7	52291234	52296699	0.020895122	ENSSSCG00000001746	ENSSSCG00000001746	Uncharacterized protein [Source:UniProtKB/TrEMBL;Acc:F1RKV2]	gene	overlapping	0	10.321	26.941
Chr7:61103482-61109273	7	61103482	61109273	0.018029813	ENSSSCG00000001863	ENSSSCG00000001863	Uncharacterized protein [Source:UniProtKB/TrEMBL;Acc:F1SJX0]	gene	overlapping	0	18.5787	10.0471
Chr7:61121179-61129625	7	61121179	61129625	0.017498374	ENSSSCG00000001863	ENSSSCG00000001863	Uncharacterized protein [Source:UniProtKB/TrEMBL;Acc:F1SJX0]	gene	overlapping	0	8.84907	21.4585
Chr7:84295783-84326712	7	84295783	84326712	0.017762743	ENSSSCG00000002175	ENSSSCG00000002175	Uncharacterized protein [Source:UniProtKB/TrEMBL;Acc:F1S7N4]	gene	overlapping	0	17.1062	29.3914
Chr7:131354494-131357021	7	131354494	131357021	0.023716085	ENSSSCG00000002551	ENSSSCG00000002551	Uncharacterized protein [Source:UniProtKB/TrEMBL;Acc:F1S9V5]	gene	overlapping	0	15.8182	27.6431
Chr6:27347531-27361724	6	27347531	27361724	0.024227947	ENSSSCG00000002826	ENSSSCG00000002826	Uncharacterized protein [Source:UniProtKB/TrEMBL;Acc:F1RF14]	gene	overlapping	0	27.8893	4.77963
Chr6:52799897-52804630	6	52799897	52804630	0.015160902	ENSSSCG00000003252	ENSSSCG00000003252	Uncharacterized protein [Source:UniProtKB/TrEMBL;Acc:F1RNK4]	gene	overlapping	0	22.6213	9.73061
Chr6:66870832-66879384	6	66870832	66879384	0.02724011	ENSSSCG00000003443	ENSSSCG00000003443	No description	gene	overlapping	0	16.6467	2.21955
Chr6:140387667-140392802	6	140387667	140392802	0.028534375	ENSSSCG00000003827	ENSSSCG00000003827	No description	gene	overlapping	0	12.3236	30.0337
Chr1:16473707-16478061	1	16473707	16478061	0.015054521	ENSSSCG00000004082	ENSSSCG00000004082	No description	gene	overlapping	0	26.0306	9.26515
Chr1:23875750-23882605	1	23875750	23882605	0.019130426	ENSSSCG00000004132	ENSSSCG00000004132	No description	gene	overlapping	0	10.7181	24.6029
Chr1:35951270-35958933	1	35951270	35958933	0.015154423	ENSSSCG00000004199	ENSSSCG00000004199	No description	gene	overlapping	0	5.94578	20.11
Chr1:62622022-62639248	1	62622022	62639248	0.017647086	ENSSSCG00000004303	ENSSSCG00000004303	Uncharacterized protein [Source:UniProtKB/TrEMBL;Acc:F1S0G2]	gene	overlapping	0	20.754	10.2647
Chr1:179319006-179326155	1	179319006	179326155	0.011869259	ENSSSCG00000004911	ENSSSCG00000004911	Uncharacterized protein [Source:UniProtKB/TrEMBL;Acc:F1SMS5]	gene	overlapping	0	15.6837	3.97314
Chr1:188601972-188626700	1	188601972	188626700	0.017647086	ENSSSCG00000004989	ENSSSCG00000004989	Uncharacterized protein [Source:UniProtKB/TrEMBL;Acc:F1SIP8]	gene	overlapping	0	10.0511	20.8504
Chr1:286000657-286003141	1	286000657	286003141	0.04289775	ENSSSCG00000005487	ENSSSCG00000005487	No description	gene	overlapping	0	28.5807	14.9226
Chr1:286104310-286107194	1	286104310	286107194	0.017561477	ENSSSCG00000005487	ENSSSCG00000005487	No description	gene	overlapping	0	19.6731	5.11315
Chr1:286134848-286139745	1	286134848	286139745	0.015758054	ENSSSCG00000005487	ENSSSCG00000005487	No description	gene	overlapping	0	14.0563	2.49496
Chr1:304357882-304359960	1	304357882	304359960	0.04869079	ENSSSCG00000005699	ENSSSCG00000005699	No description	gene	overlapping	0	27.9835	12.8845
Chr1:304393521-304396343	1	304393521	304396343	0.017561477	ENSSSCG00000005699	ENSSSCG00000005699	No description	gene	overlapping	0	26.574	12.0748
Chr1:304442208-304444305	1	304442208	304444305	0.02724011	ENSSSCG00000005699	ENSSSCG00000005699	No description	gene	overlapping	0	21.2369	7.92919
Chr4:683818-686297	4	683818	686297	0.042846277	ENSSSCG00000005921	ENSSSCG00000005921	Uncharacterized protein [Source:UniProtKB/TrEMBL;Acc:F1RSL4]	gene	overlapping	0	11.9413	28.5084
Chr4:3916723-3919156	4	3916723	3919156	0.024584439	ENSSSCG00000005938	ENSSSCG00000005938	No description	gene	overlapping	0	11.4591	2.45101
Chr4:3980514-3982332	4	3980514	3982332	0.024357228	ENSSSCG00000005938	ENSSSCG00000005938	No description	gene	overlapping	0	10.465	1.05514
Chr4:84154451-84160424	4	84154451	84160424	0.015634118	ENSSSCG00000006260	ENSSSCG00000006260	Uncharacterized protein [Source:UniProtKB/TrEMBL;Acc:F1RSG9]	gene	overlapping	0	7.16953	15.0591
Chr4:130618829-130624337	4	130618829	130624337	0.020693757	ENSSSCG00000006876	ENSSSCG00000006876	Uncharacterized protein [Source:UniProtKB/TrEMBL;Acc:F1S552]	gene	overlapping	0	40.303	18.3203
Chr17:12936569-12965531	17	12936569	12965531	0.02455016	ENSSSCG00000007025	ENSSSCG00000007025	No description	gene	overlapping	0	23.6604	11.713
Chr3:356655-358173	3	356655	358173	0.017561477	ENSSSCG00000007544	ENSSSCG00000007544	No description	gene	overlapping	0	13.3633	35.4492
Chr3:4633882-4634966	3	4633882	4634966	0.017561477	ENSSSCG00000007583	ENSSSCG00000007583	No description	gene	upstream	695	8.63574	21.3919
Chr3:5237775-5240136	3	5237775	5240136	0.014597619	ENSSSCG00000007589	ENSSSCG00000007589	Uncharacterized protein [Source:UniProtKB/TrEMBL;Acc:F1RFN1]	gene	overlapping	0	8.07102	20.2166
Chr3:6687256-6689635	3	6687256	6689635	0.018525917	ENSSSCG00000007622	ENSSSCG00000007622	Uncharacterized protein [Source:UniProtKB/TrEMBL;Acc:F1RNS9]	gene	overlapping	0	19.4514	8.90944
Chr3:17526557-17531237	3	17526557	17531237	0.023412088	ENSSSCG00000007760	ENSSSCG00000007760	No description	gene	downstream	1045	12.6899	0.773894
Chr3:26159466-26162893	3	26159466	26162893	0.043630168	ENSSSCG00000007858	ENSSSCG00000007858	Uncharacterized protein [Source:UniProtKB/TrEMBL;Acc:F1RPB0]	gene	overlapping	0	13.3755	3.71527
Chr3:27176078-27180093	3	27176078	27180093	0.029408617	ENSSSCG00000007871	ENSSSCG00000007871	Uncharacterized protein [Source:UniProtKB/TrEMBL;Acc:F1RLT4]	gene	downstream	1140	21.4792	10.0058
Chr3:31469485-31472457	3	31469485	31472457	0.017561477	ENSSSCG00000007885	ENSSSCG00000007885	No description	gene	overlapping	0	11.8285	25.0831
Chr3:42809492-42811965	3	42809492	42811965	0.018885214	ENSSSCG00000008062	ENSSSCG00000008062	No description	gene	overlapping	0	20.5791	11.5001
Chr3:48459166-48464282	3	48459166	48464282	0.015160902	ENSSSCG00000008120	ENSSSCG00000008120	Uncharacterized protein [Source:UniProtKB/TrEMBL;Acc:F1SU52]	gene	overlapping	0	7.14384	24.0036
Chr3:56975435-56982393	3	56975435	56982393	0.015634118	ENSSSCG00000008177	ENSSSCG00000008177	No description	gene	overlapping	0	3.72524	16.7565
Chr3:66492219-66507650	3	66492219	66507650	0.01848475	ENSSSCG00000008250	ENSSSCG00000008250	No description	gene	overlapping	0	9.04896	19.6258
Chr3:125344634-125402966	3	125344634	125402966	0.035234716	ENSSSCG00000008596	ENSSSCG00000008596	No description	gene	overlapping	0	13.0101	21.8613
Chr8:2289824-2292208	8	2289824	2292208	0.036543604	ENSSSCG00000008706	ENSSSCG00000008706	Uncharacterized protein [Source:UniProtKB/TrEMBL;Acc:F1S8L7]	gene	overlapping	0	27.694	11.2407
Chr8:40630477-40635089	8	40630477	40635089	0.016239073	ENSSSCG00000008826	ENSSSCG00000008826	Uncharacterized protein [Source:UniProtKB/TrEMBL;Acc:F1SE95]	gene	overlapping	0	13.4334	24.673
Chr8:83447599-83456620	8	83447599	83456620	0.018604046	ENSSSCG00000009021	ENSSSCG00000009021	No description	gene	overlapping	0	10.9228	31.8649
Chr11:22983451-22988159	11	22983451	22988159	0.020717006	ENSSSCG00000009422	ENSSSCG00000009422	No description	gene	overlapping	0	5.07809	18.6883
Chr11:76348283-76352656	11	76348283	76352656	0.017561477	ENSSSCG00000009522	ENSSSCG00000009522	No description	gene	overlapping	0	16.5373	28.4296
Chr11:86508339-86509762	11	86508339	86509762	0.029824207	ENSSSCG00000009560	ENSSSCG00000009560	Uncharacterized protein [Source:UniProtKB/TrEMBL;Acc:F1RN38]	gene	overlapping	0	36.0062	24.272
Chr11:86509807-86510894	11	86509807	86510894	0.025398737	ENSSSCG00000009560	ENSSSCG00000009560	Uncharacterized protein [Source:UniProtKB/TrEMBL;Acc:F1RN38]	gene	overlapping	0	14.7758	25.4461
Chr14:3140448-3150393	14	3140448	3150393	0.015634118	ENSSSCG00000009591	ENSSSCG00000009591	Uncharacterized protein [Source:UniProtKB/TrEMBL;Acc:F1RN09]	gene	overlapping	0	12.5875	23.6632
Chr14:4526371-4539694	14	4526371	4539694	0.034454018	ENSSSCG00000009598	ENSSSCG00000009598	No description	gene	overlapping	0	37.2644	12.4425
Chr14:6501616-6506249	14	6501616	6506249	0.017803876	ENSSSCG00000009608	ENSSSCG00000009608	No description	gene	downstream	75	4.60043	15.5325
Chr14:34841746-34848730	14	34841746	34848730	0.026375437	ENSSSCG00000009837	ENSSSCG00000009837	Uncharacterized protein [Source:UniProtKB/TrEMBL;Acc:F1RL47]	gene	overlapping	0	10.4243	24.7321
Chr14:153603116-153604938	14	153603116	153604938	0.026172215	ENSSSCG00000010788	ENSSSCG00000010788	Uncharacterized protein [Source:UniProtKB/TrEMBL;Acc:F1SAC3]	gene	upstream	1754	5.84199	21.0002
Chr10:36141053-36148090	10	36141053	36148090	0.031067282	ENSSSCG00000010964	ENSSSCG00000010964	No description	gene	overlapping	0	8.92918	19.9027
Chr10:54801912-54809803	10	54801912	54809803	0.015160902	ENSSSCG00000011059	ENSSSCG00000011059	No description	gene	overlapping	0	8.09466	16.3888
Chr10:62968074-62970752	10	62968074	62970752	0.02995978	ENSSSCG00000011103	ENSSSCG00000011103	No description	gene	overlapping	0	12.2497	29.3783
Chr13:168173362-168183068	13	168173362	168183068	0.018824909	ENSSSCG00000011965	ENSSSCG00000011965	Uncharacterized protein [Source:UniProtKB/TrEMBL;Acc:F1SKZ6]	gene	overlapping	0	14.2016	24.4658
ChrX:16601589-16605484	X	16601589	16605484	0.02841843	ENSSSCG00000012158	ENSSSCG00000012158	No description	gene	overlapping	0	15.6122	1.17347
ChrX:63641093-63647852	X	63641093	63647852	0.027249651	ENSSSCG00000012377	ENSSSCG00000012377	Uncharacterized protein [Source:UniProtKB/TrEMBL;Acc:F1RTL0]	gene	overlapping	0	20.3537	3.67684
ChrX:122256282-122260755	X	122256282	122260755	0.016852178	ENSSSCG00000012654	ENSSSCG00000012654	Uncharacterized protein [Source:UniProtKB/TrEMBL;Acc:F1RTH6]	gene	overlapping	0	7.4489	22.6461
ChrX:141418204-141420606	X	141418204	141420606	0.04275166	ENSSSCG00000012759	ENSSSCG00000012759	No description	gene	overlapping	0	22.0226	0.687681
Chr2:3595692-3597713	2	3595692	3597713	0.018824909	ENSSSCG00000012895	ENSSSCG00000012895	Uncharacterized protein [Source:UniProtKB/TrEMBL;Acc:F1RVN2]	gene	overlapping	0	22.5633	32.2054
Chr2:57698815-57731733	2	57698815	57731733	0.020832714	ENSSSCG00000013942	ENSSSCG00000013942	Uncharacterized protein [Source:UniProtKB/TrEMBL;Acc:F1S6N5]	gene	overlapping	0	24.5685	12.6465
Chr2:56997091-57023503	2	56997091	57023503	0.023220595	ENSSSCG00000013953	ENSSSCG00000013953	Uncharacterized protein [Source:UniProtKB/TrEMBL;Acc:F1S6L4]	gene	overlapping	0	17.7952	7.99304
Chr2:86960047-86966105	2	86960047	86966105	0.031067282	ENSSSCG00000014087	ENSSSCG00000014087	Uncharacterized protein [Source:UniProtKB/TrEMBL;Acc:F1S2H8]	gene	overlapping	0	18.7886	33.1276
Chr2:90944287-90957627	2	90944287	90957627	0.021840535	ENSSSCG00000014121	ENSSSCG00000014121	No description	gene	overlapping	0	7.74534	18.8303
Chr2:144946106-144951749	2	144946106	144951749	0.024524823	ENSSSCG00000014320	ENSSSCG00000014320	No description	gene	overlapping	0	11.0363	23.9922
Chr2:146929211-146932682	2	146929211	146932682	0.02520181	ENSSSCG00000014342	ENSSSCG00000014342	No description	gene	overlapping	0	12.7083	25.5392
Chr2:162142820-162147356	2	162142820	162147356	0.017561477	ENSSSCG00000014564	ENSSSCG00000014564	Ifitm1-like protein [Source:UniProtKB/TrEMBL;Acc:A9QW81]	gene	overlapping	0	10.6762	2.5579
Chr9:3329290-3338499	9	3329290	3338499	0.01924076	ENSSSCG00000014614	ENSSSCG00000014614	Uncharacterized protein [Source:UniProtKB/TrEMBL;Acc:F1RMR0]	gene	overlapping	0	25.6757	12.4058
Chr9:4742615-4860262	9	4742615	4860262	0.0150790755	ENSSSCG00000014669	ENSSSCG00000014669	Uncharacterized protein [Source:UniProtKB/TrEMBL;Acc:F1RLV8]	gene	overlapping	0	4.21433	25.0253
Chr9:21916971-21923309	9	21916971	21923309	0.017561477	ENSSSCG00000014909	ENSSSCG00000014909	Uncharacterized protein [Source:UniProtKB/TrEMBL;Acc:F1STT2]	gene	overlapping	0	29.8372	17.2228
Chr9:49200721-49208526	9	49200721	49208526	0.015634118	ENSSSCG00000015064	ENSSSCG00000015064	Uncharacterized protein [Source:UniProtKB/TrEMBL;Acc:F1SJV1]	gene	overlapping	0	8.67687	18.8293
Chr9:70737731-70743985	9	70737731	70743985	0.018635947	ENSSSCG00000015273	ENSSSCG00000015273	No description	gene	overlapping	0	22.9204	9.71165
Chr9:150709278-150712337	9	150709278	150712337	0.021688646	ENSSSCG00000015632	ENSSSCG00000015632	Uncharacterized protein [Source:UniProtKB/TrEMBL;Acc:F1SF13]	gene	overlapping	0	19.6858	34.1079
Chr9:151799556-151804078	9	151799556	151804078	0.017762743	ENSSSCG00000015634	ENSSSCG00000015634	Uncharacterized protein [Source:UniProtKB/TrEMBL;Acc:F1SF10]	gene	overlapping	0	4.67966	15.5559
Chr15:88572468-88578059	15	88572468	88578059	0.019579599	ENSSSCG00000015960	ENSSSCG00000015960	Uncharacterized protein [Source:UniProtKB/TrEMBL;Acc:F1S066]	gene	overlapping	0	7.45344	21.0112
Chr15:111805863-111820030	15	111805863	111820030	0.019102953	ENSSSCG00000016071	ENSSSCG00000016071	No description	gene	overlapping	0	27.9848	14.6994
Chr15:133429328-133432382	15	133429328	133432382	0.02371031	ENSSSCG00000016186	ENSSSCG00000016186	No description	gene	overlapping	0	29.4166	16.7077
Chr15:154781077-154782301	15	154781077	154782301	0.023502335	ENSSSCG00000016369	ENSSSCG00000016369	No description	gene	overlapping	0	38.1291	27.6942
Chr12:2006745-2007857	12	2006745	2007857	0.01852583	ENSSSCG00000017146	ENSSSCG00000017146	Uncharacterized protein [Source:UniProtKB/TrEMBL;Acc:F1RZA6]	gene	overlapping	0	22.0919	8.9532
Chr12:2063031-2064478	12	2063031	2064478	0.017561477	ENSSSCG00000017146	ENSSSCG00000017146	Uncharacterized protein [Source:UniProtKB/TrEMBL;Acc:F1RZA6]	gene	overlapping	0	7.65324	18.9285
Chr12:26723055-26729962	12	26723055	26729962	0.014423086	ENSSSCG00000017576	ENSSSCG00000017576	No description	gene	overlapping	0	16.4379	6.66442
Chr12:38016211-38026359	12	38016211	38026359	0.017742276	ENSSSCG00000017675	ENSSSCG00000017675	Uncharacterized protein [Source:UniProtKB/TrEMBL;Acc:F1S219]	gene	overlapping	0	21.2394	7.77364
Chr12:41160490-41166271	12	41160490	41166271	0.02415672	ENSSSCG00000017702	ENSSSCG00000017702	Uncharacterized protein [Source:UniProtKB/TrEMBL;Acc:F1S1A0]	gene	overlapping	0	5.02192	15.5403
Chr12:41422809-41428636	12	41422809	41428636	0.019102953	ENSSSCG00000017712	ENSSSCG00000017712	No description	gene	overlapping	0	4.14964	19.521
Chr12:51375216-51382300	12	51375216	51382300	0.025849504	ENSSSCG00000017849	ENSSSCG00000017849	Uncharacterized protein [Source:UniProtKB/TrEMBL;Acc:F1RLM9]	gene	overlapping	0	10.7677	24.3871
Chr12:52881550-52884336	12	52881550	52884336	0.024365392	ENSSSCG00000017892	ENSSSCG00000017892	Uncharacterized protein [Source:UniProtKB/TrEMBL;Acc:F1RGM2]	gene	overlapping	0	13.2721	1.57582
Chr12:61897788-61901370	12	61897788	61901370	0.018027991	ENSSSCG00000018027	ENSSSCG00000018027	Uncharacterized protein [Source:UniProtKB/TrEMBL;Acc:F1SDE9]	gene	overlapping	0	15.6747	26.596
Chr12:62912873-62914005	12	62912873	62914005	0.01665278	ENSSSCG00000018049	ENSSSCG00000018049	No description	gene	overlapping	0	22.1319	33.6925
Chr10:70380418-70385127	10	70380418	70385127	0.020543657	ENSSSCG00000018589	ENSSSCG00000018589	No description	gene	overlapping	0	16.5591	5.49039
ChrX:130831985-130839838	X	130831985	130839838	0.017803876	ENSSSCG00000019163	ENSSSCG00000019163	No description	gene	overlapping	0	6.55819	25.7758
Chr1:204270606-204279264	1	204270606	204279264	0.0160501	ENSSSCG00000019745	ENSSSCG00000019745	No description	gene	downstream	438	18.4389	40.4833
Chr2:42125859-42129581	2	42125859	42129581	0.0205094	ENSSSCG00000020098	ENSSSCG00000020098	No description	gene	upstream	494	10.4062	25.1555
Chr6:12666269-12669226	6	12666269	12669226	0.01762378	ENSSSCG00000020668	ENSSSCG00000020668	No description	gene	overlapping	0	6.29132	19.0427
ChrX:95521519-95526508	X	95521519	95526508	0.022053804	ENSSSCG00000020695	ENSSSCG00000020695	No description	gene	overlapping	0	17.1722	1.72884
Chr7:14300782-14307818	7	14300782	14307818	0.028760873	ENSSSCG00000020858	ENSSSCG00000020858	No description	gene	overlapping	0	19.6002	8.34834
Chr15:107262627-107271818	15	107262627	107271818	0.020179864	ENSSSCG00000020860	ENSSSCG00000020860	No description	gene	overlapping	0	13.583	30.2388
Chr2:155142963-155153289	2	155142963	155153289	0.03360305	ENSSSCG00000021111	ENSSSCG00000021111	No description	gene	overlapping	0	6.06923	19.8708
Chr1:187598620-187608355	1	187598620	187608355	0.04327131	ENSSSCG00000021112	ENSSSCG00000021112	No description	gene	overlapping	0	17.7482	32.0556
Chr12:1816958-1818450	12	1816958	1818450	0.01762378	ENSSSCG00000021150	ENSSSCG00000021150	No description	gene	overlapping	0	10.7155	28.9003
Chr12:1881455-1883564	12	1881455	1883564	0.023477685	ENSSSCG00000021150	ENSSSCG00000021150	No description	gene	overlapping	0	9.46033	33.7236
Chr15:88127711-88141252	15	88127711	88141252	0.022552798	ENSSSCG00000021446	ENSSSCG00000021446	No description	gene	overlapping	0	5.93319	18.6224
Chr15:88141253-88148811	15	88141253	88148811	0.017997408	ENSSSCG00000021446	ENSSSCG00000021446	No description	gene	overlapping	0	17.1613	8.05639
Chr4:134232684-134234531	4	134232684	134234531	0.014597619	ENSSSCG00000021743	ENSSSCG00000021743	Solute carrier family 44 member 3; Uncharacterized protein [Source:UniProtKB/TrEMBL;Acc:A9X945]	gene	overlapping	0	9.65616	3.44637
Chr4:16902842-16907253	4	16902842	16907253	0.017561477	ENSSSCG00000021744	ENSSSCG00000021744	Uncharacterized protein [Source:UniProtKB/TrEMBL;Acc:F1RR11]	gene	upstream	511	8.85516	16.6639
Chr6:43335679-43338407	6	43335679	43338407	0.032461055	ENSSSCG00000021959	ENSSSCG00000021959	No description	gene	downstream	509	20.589	3.06707
Chr18:3555635-3557323	18	3555635	3557323	0.017237658	ENSSSCG00000022007	ENSSSCG00000022007	No description	gene	overlapping	0	11.9426	1.44897
Chr5:89406403-89413808	5	89406403	89413808	0.0186633	ENSSSCG00000022083	ENSSSCG00000022083	No description	gene	overlapping	0	17.6744	32.6407
Chr9:128500843-128513925	9	128500843	128513925	0.026316337	ENSSSCG00000022119	ENSSSCG00000022119	No description	gene	overlapping	0	28.7421	10.2486
Chr8:30957169-31013762	8	30957169	31013762	0.01618038	ENSSSCG00000022262	ENSSSCG00000022262	No description	gene	overlapping	0	9.23624	19.1245
Chr12:36350282-36358963	12	36350282	36358963	0.021340378	ENSSSCG00000022267	ENSSSCG00000022267	No description	gene	overlapping	0	10.8742	22.438
Chr3:42610332-42612475	3	42610332	42612475	0.015965132	ENSSSCG00000022316	ENSSSCG00000022316	No description	gene	overlapping	0	22.3724	7.81968
Chr18:12550077-12558059	18	12550077	12558059	0.021539332	ENSSSCG00000022517	ENSSSCG00000022517	No description	gene	overlapping	0	9.75938	26.5768
Chr8:123730778-123746288	8	123730778	123746288	0.03564101	ENSSSCG00000022709	ENSSSCG00000022709	No description	gene	overlapping	0	19.1076	29.9907
Chr1:10809783-10813061	1	10809783	10813061	0.046088625	ENSSSCG00000022710	ENSSSCG00000022710	No description	gene	overlapping	0	14.7643	25.544
Chr15:36563273-36573127	15	36563273	36573127	0.016239073	ENSSSCG00000022715	ENSSSCG00000022715	No description	gene	downstream	1399	6.12442	25.0532
Chr16:35844644-35875888	16	35844644	35875888	0.037406027	ENSSSCG00000022723	ENSSSCG00000022723	Uncharacterized protein [Source:UniProtKB/TrEMBL;Acc:F1SLQ1]	gene	overlapping	0	5.98004	19.9132
Chr13:183860435-183877130	13	183860435	183877130	0.01618038	ENSSSCG00000022789	ENSSSCG00000022789	No description	gene	overlapping	0	3.48024	10.5781
Chr9:56078924-56087073	9	56078924	56087073	0.014989286	ENSSSCG00000022920	ENSSSCG00000022920	Uncharacterized protein [Source:UniProtKB/TrEMBL;Acc:F1S9N0]	gene	downstream	744	9.5996	32.6123
Chr4:135838800-135843467	4	135838800	135843467	0.047214735	ENSSSCG00000023131	ENSSSCG00000023131	No description	gene	upstream	1881	23.0001	10.5424
Chr1:74992716-75000795	1	74992716	75000795	0.022085316	ENSSSCG00000023154	ENSSSCG00000023154	No description	gene	overlapping	0	20.6183	6.44686
Chr7:65328406-65338885	7	65328406	65338885	0.017762743	ENSSSCG00000023188	ENSSSCG00000023188	No description	gene	overlapping	0	5.74703	15.1786
Chr6:42637786-42640501	6	42637786	42640501	0.027432026	ENSSSCG00000023220	ENSSSCG00000023220	No description	gene	overlapping	0	15.5389	33.3842
Chr8:67038683-67074168	8	67038683	67074168	0.017917557	ENSSSCG00000023488	ENSSSCG00000023488	No description	gene	overlapping	0	8.94184	18.1956
Chr13:67543474-67552040	13	67543474	67552040	0.023052381	ENSSSCG00000023721	ENSSSCG00000023721	No description	gene	overlapping	0	12.7417	25.1503
Chr11:3261835-3266783	11	3261835	3266783	0.016878413	ENSSSCG00000023771	ENSSSCG00000023771	No description	gene	overlapping	0	35.233	7.25367
Chr5:36831527-36838946	5	36831527	36838946	0.017762743	ENSSSCG00000023799	ENSSSCG00000023799	No description	gene	downstream	1621	22.2537	12.3928
Chr18:55494970-55498086	18	55494970	55498086	0.015965132	ENSSSCG00000023820	ENSSSCG00000023820	Uncharacterized protein [Source:UniProtKB/TrEMBL;Acc:F1ST48]	gene	overlapping	0	13.2537	5.20313
Chr4:30424335-30439256	4	30424335	30439256	0.01704849	ENSSSCG00000023954	ENSSSCG00000023954	No description	gene	upstream	659	21.0558	35.1161
Chr15:145682817-145686152	15	145682817	145686152	0.020223428	ENSSSCG00000023994	ENSSSCG00000023994	No description	gene	overlapping	0	16.405	5.66494
Chr15:145720567-145723678	15	145720567	145723678	0.014989286	ENSSSCG00000023994	ENSSSCG00000023994	No description	gene	overlapping	0	5.96073	15.9966
Chr1:141731603-141740274	1	141731603	141740274	0.018824909	ENSSSCG00000023996	ENSSSCG00000023996	No description	gene	overlapping	0	23.7325	7.73672
ChrX:12043554-12061130	X	12043554	12061130	0.018772364	ENSSSCG00000024032	ENSSSCG00000024032	No description	gene	overlapping	0	11.9763	25.0987
Chr5:103893061-103897407	5	103893061	103897407	0.022030134	ENSSSCG00000024065	ENSSSCG00000024065	No description	gene	overlapping	0	8.41762	20.2208
Chr1:120431770-120435493	1	120431770	120435493	0.017762743	ENSSSCG00000024088	ENSSSCG00000024088	No description	gene	overlapping	0	15.6431	32.2344
Chr4:51484285-51502643	4	51484285	51502643	0.02724011	ENSSSCG00000024096	ENSSSCG00000024096	No description	gene	overlapping	0	39.0094	20.2261
Chr9:79966507-80015495	9	79966507	80015495	0.01762378	ENSSSCG00000024381	ENSSSCG00000024381	No description	gene	overlapping	0	13.4712	23.4097
Chr12:58571172-58580105	12	58571172	58580105	0.020869285	ENSSSCG00000024467	ENSSSCG00000024467	No description	gene	overlapping	0	17.2654	36.9872
Chr12:58613497-58615705	12	58613497	58615705	0.022784486	ENSSSCG00000024467	ENSSSCG00000024467	No description	gene	overlapping	0	11.1964	21.9021
Chr13:79050404-79057231	13	79050404	79057231	0.015160902	ENSSSCG00000024552	ENSSSCG00000024552	No description	gene	overlapping	0	11.8864	27.3596
Chr9:139635715-139650274	9	139635715	139650274	0.015160902	ENSSSCG00000024629	ENSSSCG00000024629	No description	gene	upstream	1687	29.1595	13.4812
Chr13:47558396-47569778	13	47558396	47569778	0.017561477	ENSSSCG00000024705	ENSSSCG00000024705	No description	gene	overlapping	0	8.38859	25.3632
Chr11:26096817-26103270	11	26096817	26103270	0.025801167	ENSSSCG00000024707	ENSSSCG00000024707	No description	gene	overlapping	0	22.6824	3.20877
Chr15:149883861-149886383	15	149883861	149886383	0.02724011	ENSSSCG00000024859	ENSSSCG00000024859	No description	gene	overlapping	0	10.1652	25.1712
Chr15:150008665-150010085	15	150008665	150010085	0.025598738	ENSSSCG00000024859	ENSSSCG00000024859	No description	gene	overlapping	0	25.6636	39.2257
Chr15:150069610-150072216	15	150069610	150072216	0.04078572	ENSSSCG00000024859	ENSSSCG00000024859	No description	gene	overlapping	0	19.0682	39.0489
Chr5:1009651-1013188	5	1009651	1013188	0.015965132	ENSSSCG00000024864	ENSSSCG00000024864	No description	gene	overlapping	0	12.9722	25.4567
Chr1:10378336-10380143	1	10378336	10380143	0.016239073	ENSSSCG00000024876	ENSSSCG00000024876	No description	gene	upstream	1112	19.5355	7.32237
Chr3:1620420-1621500	3	1620420	1621500	0.030040314	ENSSSCG00000024952	ENSSSCG00000024952	No description	gene	overlapping	0	19.7277	40.9556
Chr3:1729367-1730430	3	1729367	1730430	0.04045562	ENSSSCG00000024952	ENSSSCG00000024952	No description	gene	overlapping	0	25.4614	43.5752
Chr3:1754076-1755633	3	1754076	1755633	0.020192476	ENSSSCG00000024952	ENSSSCG00000024952	No description	gene	overlapping	0	12.895	28.0921
Chr14:63152513-63221496	14	63152513	63221496	0.01924076	ENSSSCG00000024955	ENSSSCG00000024955	No description	gene	overlapping	0	4.51043	25.8155
Chr2:55532727-55568410	2	55532727	55568410	0.018824909	ENSSSCG00000025084	ENSSSCG00000025084	No description	gene	overlapping	0	21.5888	10.7062
Chr16:82337299-82399322	16	82337299	82399322	0.01618038	ENSSSCG00000025115	ENSSSCG00000025115	No description	gene	overlapping	0	17.1261	30.7938
Chr9:113154461-113160193	9	113154461	113160193	0.019840408	ENSSSCG00000025166	ENSSSCG00000025166	No description	gene	overlapping	0	4.64774	16.3569
Chr15:152359829-152361611	15	152359829	152361611	0.015965132	ENSSSCG00000025228	ENSSSCG00000025228	No description	gene	overlapping	0	28.98	9.69096
Chr1:130660011-130674178	1	130660011	130674178	0.034686767	ENSSSCG00000025257	ENSSSCG00000025257	No description	gene	overlapping	0	11.3321	26.7671
Chr12:9180548-9207513	12	9180548	9207513	0.038283512	ENSSSCG00000025361	ENSSSCG00000025361	No description	gene	overlapping	0	6.06555	23.3162
Chr1:86916247-86928687	1	86916247	86928687	0.025551155	ENSSSCG00000025439	ENSSSCG00000025439	No description	gene	overlapping	0	17.3215	28.683
Chr11:12719408-12726137	11	12719408	12726137	0.020791678	ENSSSCG00000025521	ENSSSCG00000025521	No description	gene	overlapping	0	5.05323	15.8989
Chr6:101194961-101202342	6	101194961	101202342	0.019636817	ENSSSCG00000025584	ENSSSCG00000025584	No description	gene	overlapping	0	18.1618	7.33267
Chr12:1749263-1750602	12	1749263	1750602	0.024246259	ENSSSCG00000025624	ENSSSCG00000025624	No description	gene	overlapping	0	12.2174	29.5878
ChrX:6903113-6961923	X	6903113	6961923	0.014989286	ENSSSCG00000025648	ENSSSCG00000025648	Uncharacterized protein [Source:UniProtKB/TrEMBL;Acc:F1SG20]	gene	overlapping	0	12.2984	30.6007
Chr5:103619511-103624889	5	103619511	103624889	0.025773292	ENSSSCG00000025663	ENSSSCG00000025663	No description	gene	overlapping	0	17.7444	41.3761
Chr5:103638152-103642047	5	103638152	103642047	0.039279398	ENSSSCG00000025663	ENSSSCG00000025663	No description	gene	overlapping	0	25.8754	49.2854
Chr4:382652-384108	4	382652	384108	0.017717836	ENSSSCG00000025736	ENSSSCG00000025736	Uncharacterized protein [Source:UniProtKB/TrEMBL;Acc:F1RSP7]	gene	overlapping	0	20.8263	31.5652
Chr3:5271052-5272562	3	5271052	5272562	0.021281665	ENSSSCG00000025940	ENSSSCG00000025940	Uncharacterized protein [Source:UniProtKB/TrEMBL;Acc:F1RFM1]	gene	overlapping	0	20.8271	34.5806
Chr6:4396638-4398921	6	4396638	4398921	0.01762378	ENSSSCG00000025959	ENSSSCG00000025959	No description	gene	overlapping	0	22.9687	13.165
Chr18:5837824-5841161	18	5837824	5841161	0.015160902	ENSSSCG00000026023	ENSSSCG00000026023	No description	gene	overlapping	0	19.4275	6.85434
Chr18:5899395-5902148	18	5899395	5902148	0.017561477	ENSSSCG00000026023	ENSSSCG00000026023	No description	gene	overlapping	0	13.6069	3.86553
Chr6:56006058-56010799	6	56006058	56010799	0.02006486	ENSSSCG00000026045	ENSSSCG00000026045	No description	gene	overlapping	0	50.1186	34.0381
Chr11:12151982-12155872	11	12151982	12155872	0.014423086	ENSSSCG00000026164	ENSSSCG00000026164	No description	gene	overlapping	0	14.4627	26.0888
Chr11:12155881-12159610	11	12155881	12159610	0.021833839	ENSSSCG00000026164	ENSSSCG00000026164	No description	gene	overlapping	0	23.3669	36.9375
Chr16:82825044-82826717	16	82825044	82826717	0.017561477	ENSSSCG00000026531	ENSSSCG00000026531	No description	gene	upstream	17	16.4129	27.9301
Chr6:5816620-5819334	6	5816620	5819334	0.025909876	ENSSSCG00000026558	ENSSSCG00000026558	No description	gene	overlapping	0	14.9172	34.2908
Chr18:1427318-1428181	18	1427318	1428181	0.03164517	ENSSSCG00000026652	ENSSSCG00000026652	No description	gene	overlapping	0	16.627	40.1184
Chr18:1436257-1438788	18	1436257	1438788	0.015965132	ENSSSCG00000026652	ENSSSCG00000026652	No description	gene	overlapping	0	29.1836	9.06423
Chr18:10579967-10582131	18	10579967	10582131	0.014645071	ENSSSCG00000026733	ENSSSCG00000026733	No description	gene	overlapping	0	33.5936	17.4754
Chr8:129891012-129900861	8	129891012	129900861	0.014954044	ENSSSCG00000026779	ENSSSCG00000026779	No description	gene	overlapping	0	13.3855	23.2041
Chr13:80511100-80515043	13	80511100	80515043	0.017498374	ENSSSCG00000026804	ENSSSCG00000026804	No description	gene	overlapping	0	11.9739	22.0184
Chr9:138651283-138661471	9	138651283	138661471	0.03325015	ENSSSCG00000026987	ENSSSCG00000026987	No description	gene	overlapping	0	3.56424	16.1768
Chr8:70936460-70953167	8	70936460	70953167	0.024869716	ENSSSCG00000027031	ENSSSCG00000027031	No description	gene	overlapping	0	10.0606	19.7415
Chr9:79955559-79966506	9	79955559	79966506	0.024524823	ENSSSCG00000027092	ENSSSCG00000027092	No description	gene	overlapping	0	6.54612	15.7119
Chr2:149136159-149142946	2	149136159	149142946	0.04418618	ENSSSCG00000027249	ENSSSCG00000027249	No description	gene	upstream	309	23.7269	11.3227
Chr2:83761967-83773718	2	83761967	83773718	0.046756268	ENSSSCG00000027328	ENSSSCG00000027328	No description	gene	overlapping	0	13.4244	26.0693
Chr8:19633222-19640372	8	19633222	19640372	0.014989286	ENSSSCG00000027340	ENSSSCG00000027340	No description	gene	overlapping	0	3.0212	10.9134
Chr3:117485938-117487978	3	117485938	117487978	0.0373116	ENSSSCG00000027396	ENSSSCG00000027396	No description	gene	overlapping	0	18.8427	31.5877
ChrX:86413924-86431042	X	86413924	86431042	0.039350364	ENSSSCG00000027552	ENSSSCG00000027552	No description	gene	overlapping	0	16.2304	34.4126
ChrX:86565174-86584084	X	86565174	86584084	0.016271602	ENSSSCG00000027552	ENSSSCG00000027552	No description	gene	overlapping	0	12.7115	31.6734
Chr11:2818589-2820951	11	2818589	2820951	0.01618038	ENSSSCG00000027577	ENSSSCG00000027577	No description	gene	overlapping	0	19.0095	38.2643
Chr11:2854741-2856909	11	2854741	2856909	0.020071028	ENSSSCG00000027577	ENSSSCG00000027577	No description	gene	overlapping	0	12.9785	33.7146
Chr11:2866161-2868400	11	2866161	2868400	0.047998987	ENSSSCG00000027577	ENSSSCG00000027577	No description	gene	overlapping	0	17.3267	33.5833
Chr11:2887095-2889030	11	2887095	2889030	0.031248717	ENSSSCG00000027577	ENSSSCG00000027577	No description	gene	upstream	735	17.4682	32.6595
Chr3:61927712-61940136	3	61927712	61940136	0.017803876	ENSSSCG00000027683	ENSSSCG00000027683	No description	gene	overlapping	0	16.2092	8.96868
Chr15:152008742-152012004	15	152008742	152012004	0.017561477	ENSSSCG00000027723	ENSSSCG00000027723	No description	gene	overlapping	0	24.9188	14.4912
Chr18:61112069-61114759	18	61112069	61114759	0.01729187	ENSSSCG00000027766	ENSSSCG00000027766	No description	gene	downstream	1591	12.3541	4.18678
Chr15:34814167-34818661	15	34814167	34818661	0.018153014	ENSSSCG00000027791	ENSSSCG00000027791	No description	gene	overlapping	0	17.7796	7.84426
Chr17:13868283-13875577	17	13868283	13875577	0.025948836	ENSSSCG00000027808	ENSSSCG00000027808	No description	gene	overlapping	0	15.3671	31.4386
Chr17:13884391-13896017	17	13884391	13896017	0.017237658	ENSSSCG00000027808	ENSSSCG00000027808	No description	gene	overlapping	0	8.35286	18.1915
Chr11:22187778-22192337	11	22187778	22192337	0.03263002	ENSSSCG00000027815	ENSSSCG00000027815	No description	gene	overlapping	0	6.52653	17.8871
Chr2:58739309-58742619	2	58739309	58742619	0.019679438	ENSSSCG00000027840	ENSSSCG00000027840	Uncharacterized protein [Source:UniProtKB/TrEMBL;Acc:F1S7E0]	gene	overlapping	0	20.5511	10.9182
Chr2:158338774-158352927	2	158338774	158352927	0.02151409	ENSSSCG00000027896	ENSSSCG00000027896	No description	gene	overlapping	0	19.6543	6.1621
Chr4:134751668-134754552	4	134751668	134754552	0.01762378	ENSSSCG00000027942	ENSSSCG00000027942	No description	gene	overlapping	0	26.8638	39.774
Chr10:18272279-18274566	10	18272279	18274566	0.03320921	ENSSSCG00000028096	ENSSSCG00000028096	No description	gene	overlapping	0	17.0474	40.1692
Chr2:121340652-121344308	2	121340652	121344308	0.015634118	ENSSSCG00000028164	ENSSSCG00000028164	No description	gene	overlapping	0	22.8342	12.4816
Chr8:81942939-81946448	8	81942939	81946448	0.02503483	ENSSSCG00000028236	ENSSSCG00000028236	No description	gene	overlapping	0	32.9091	15.454
Chr2:11411346-11415300	2	11411346	11415300	0.019130426	ENSSSCG00000028250	ENSSSCG00000028250	Uncharacterized protein [Source:UniProtKB/TrEMBL;Acc:F1RMI8]	gene	overlapping	0	11.045	1.92513
Chr5:9626903-9638955	5	9626903	9638955	0.03164517	ENSSSCG00000028256	ENSSSCG00000028256	No description	gene	overlapping	0	15.1944	3.56346
Chr2:52770429-52784501	2	52770429	52784501	0.011869259	ENSSSCG00000028260	ENSSSCG00000028260	No description	gene	overlapping	0	14.866	24.3709
Chr13:83933133-83938764	13	83933133	83938764	0.016878413	ENSSSCG00000028410	ENSSSCG00000028410	No description	gene	overlapping	0	19.2407	9.02027
Chr16:86039861-86040547	16	86039861	86040547	0.014645071	ENSSSCG00000028490	ENSSSCG00000028490	No description	gene	overlapping	0	37.4091	72.4987
Chr1:292567090-292571347	1	292567090	292571347	0.029220045	ENSSSCG00000028551	ENSSSCG00000028551	No description	gene	overlapping	0	8.2416	21.3767
Chr17:68847270-68848781	17	68847270	68848781	0.025849504	ENSSSCG00000028573	ENSSSCG00000028573	No description	gene	overlapping	0	14.6548	3.55712
Chr4:101256498-101308829	4	101256498	101308829	0.024365392	ENSSSCG00000028590	ENSSSCG00000028590	No description	gene	overlapping	0	3.50618	21.1283
Chr13:82312976-82323690	13	82312976	82323690	0.0186633	ENSSSCG00000028605	ENSSSCG00000028605	No description	gene	overlapping	0	10.9185	24.9191
Chr13:166988765-166998234	13	166988765	166998234	0.014989286	ENSSSCG00000028677	ENSSSCG00000028677	Uncharacterized protein [Source:UniProtKB/TrEMBL;Acc:F1SL14]	gene	overlapping	0	5.71865	16.5705
Chr1:72529501-72540137	1	72529501	72540137	0.017647086	ENSSSCG00000028811	ENSSSCG00000028811	No description	gene	overlapping	0	12.1161	21.1916
Chr7:98326604-98330032	7	98326604	98330032	0.015965132	ENSSSCG00000028877	ENSSSCG00000028877	No description	gene	overlapping	0	21.9223	36.4512
Chr1:300035065-300038447	1	300035065	300038447	0.017237658	ENSSSCG00000028891	ENSSSCG00000028891	No description	gene	overlapping	0	11.9141	2.40953
Chr5:30202038-30210142	5	30202038	30210142	0.017064258	ENSSSCG00000029004	ENSSSCG00000029004	No description	gene	overlapping	0	13.7744	24.1378
Chr13:217286367-217288304	13	217286367	217288304	0.032524012	ENSSSCG00000029038	ENSSSCG00000029038	No description	gene	overlapping	0	27.4476	6.111
Chr2:78517749-78545692	2	78517749	78545692	0.028542668	ENSSSCG00000029050	ENSSSCG00000029050	No description	gene	overlapping	0	28.2346	11.1018
Chr7:69252216-69268770	7	69252216	69268770	0.022717815	ENSSSCG00000029349	ENSSSCG00000029349	No description	gene	overlapping	0	25.1398	13.6096
Chr5:70007145-70013382	5	70007145	70013382	0.020192476	ENSSSCG00000029464	ENSSSCG00000029464	No description	gene	overlapping	0	21.5992	8.90132
Chr5:70065199-70070428	5	70065199	70070428	0.024584439	ENSSSCG00000029464	ENSSSCG00000029464	No description	gene	overlapping	0	26.7602	9.8207
Chr1:119654508-119673246	1	119654508	119673246	0.016584082	ENSSSCG00000029654	ENSSSCG00000029654	No description	gene	overlapping	0	4.80088	16.2992
Chr1:10655879-10659418	1	10655879	10659418	0.015965132	ENSSSCG00000029686	ENSSSCG00000029686	No description	gene	downstream	680	18.0978	32.3592
Chr16:74179961-74188041	16	74179961	74188041	0.023413727	ENSSSCG00000030001	ENSSSCG00000030001	No description	gene	overlapping	0	14.4186	31.4948
Chr15:117981891-117992976	15	117981891	117992976	0.017561477	ENSSSCG00000030081	ENSSSCG00000030081	No description	gene	overlapping	0	34.4966	18.8999
Chr11:11875117-11878009	11	11875117	11878009	0.028447896	ENSSSCG00000030111	ENSSSCG00000030111	No description	gene	overlapping	0	10.5209	32.6995
Chr7:72086695-72146631	7	72086695	72146631	0.014989286	ENSSSCG00000030152	ENSSSCG00000030152	No description	gene	overlapping	0	27.7935	41.6508
Chr13:217844912-217846683	13	217844912	217846683	0.015160902	ENSSSCG00000030160	ENSSSCG00000030160	No description	gene	overlapping	0	1.01211	11.6439
Chr13:217862907-217864080	13	217862907	217864080	0.015160902	ENSSSCG00000030160	ENSSSCG00000030160	No description	gene	overlapping	0	15.9196	6.59539
Chr13:217865905-217867047	13	217865905	217867047	0.015965132	ENSSSCG00000030160	ENSSSCG00000030160	No description	gene	overlapping	0	18.4551	10.521
Chr17:49639457-49646009	17	49639457	49646009	0.0186633	ENSSSCG00000030224	ENSSSCG00000030224	No description	gene	overlapping	0	5.34579	16.2892
Chr5:22345638-22368515	5	22345638	22368515	0.017561477	ENSSSCG00000030239	ENSSSCG00000030239	Uncharacterized protein [Source:UniProtKB/TrEMBL;Acc:F1SQA0]	gene	overlapping	0	21.5149	11.1268
ChrX:36561823-36568774	X	36561823	36568774	0.015965132	ENSSSCG00000030258	ENSSSCG00000030258	Uncharacterized protein [Source:UniProtKB/TrEMBL;Acc:F1RXT0]	gene	overlapping	0	9.08918	32.8911
Chr13:168414090-168423836	13	168414090	168423836	0.017035464	ENSSSCG00000030486	ENSSSCG00000030486	No description	gene	overlapping	0	9.36463	26.9535
Chr6:145983116-145986129	6	145983116	145986129	0.021370606	ENSSSCG00000030538	ENSSSCG00000030538	No description	gene	downstream	22	10.7443	22.2681
Chr1:275305036-275320100	1	275305036	275320100	0.014645071	ENSSSCG00000030554	ENSSSCG00000030554	Uncharacterized protein [Source:UniProtKB/TrEMBL;Acc:F1SP63]	gene	overlapping	0	15.3271	6.18774
Chr12:60616457-60619764	12	60616457	60619764	0.03077415	ENSSSCG00000030589	ENSSSCG00000030589	Uncharacterized protein [Source:UniProtKB/TrEMBL;Acc:F1SS46]	gene	overlapping	0	17.6008	1.23726
ChrX:117175622-117196962	X	117175622	117196962	0.014645071	ENSSSCG00000030618	ENSSSCG00000030618	No description	gene	upstream	1609	23.2081	6.36762
Chr17:44833124-44839180	17	44833124	44839180	0.018078173	EPB41L1	ENSSSCG00000007314	Uncharacterized protein [Source:UniProtKB/TrEMBL;Acc:F1S485]	gene	overlapping	0	19.2391	7.76203
Chr17:44872560-44875073	17	44872560	44875073	0.03645937	EPB41L1	ENSSSCG00000007314	Uncharacterized protein [Source:UniProtKB/TrEMBL;Acc:F1S485]	gene	overlapping	0	23.096	9.95689
Chr2:60873122-60876500	2	60873122	60876500	0.01954431	EPS15L1	ENSSSCG00000013857	Uncharacterized protein [Source:UniProtKB/TrEMBL;Acc:F1S9W6]	gene	overlapping	0	8.03681	24.704
Chr4:120837018-120841421	4	120837018	120841421	0.017498374	EPS8L3	ENSSSCG00000006820	Uncharacterized protein [Source:UniProtKB/TrEMBL;Acc:F1S606]	gene	overlapping	0	13.9655	27.4687
Chr6:154561220-154563910	6	154561220	154563910	0.015300019	ERI3	ENSSSCG00000003935	Uncharacterized protein [Source:UniProtKB/TrEMBL;Acc:F1S331]	gene	overlapping	0	10.2094	18.7803
Chr12:14932820-14935343	12	14932820	14935343	0.018652884	ERN1	ENSSSCG00000017279	Uncharacterized protein [Source:UniProtKB/TrEMBL;Acc:F1RSL5]	gene	overlapping	0	18.1808	8.48989
Chr17:25093003-25104433	17	25093003	25104433	0.01762378	ESF1	ENSSSCG00000007077	ESF1, nucleolar pre-rRNA processing protein, homolog (S. cerevisiae) [Source:HGNC Symbol;Acc:15898]	gene	overlapping	0	17.7421	6.31723
Chr7:105729403-105734069	7	105729403	105734069	0.031930514	ESRRB	ENSSSCG00000002388	Uncharacterized protein [Source:UniProtKB/TrEMBL;Acc:F1S2P9]	gene	overlapping	0	21.0679	33.1783
Chr12:5380166-5381075	12	5380166	5381075	0.030499374	EVPL	ENSSSCG00000017192	envoplakin [Source:HGNC Symbol;Acc:3503]	gene	overlapping	0	40.4166	13.1912
Chr1:314049255-314050779	1	314049255	314050779	0.016737467	EXD3	ENSSSCG00000005855	Uncharacterized protein [Source:UniProtKB/TrEMBL;Acc:F1RVW3]	gene	overlapping	0	12.1252	4.374
Chr7:124748-126804	7	124748	126804	0.01987769	EXOC2	ENSSSCG00000000985	exocyst complex component 2 [Source:HGNC Symbol;Acc:24968]	gene	overlapping	0	8.72801	28.6946
Chr7:142373-144174	7	142373	144174	0.023458801	EXOC2	ENSSSCG00000000985	exocyst complex component 2 [Source:HGNC Symbol;Acc:24968]	gene	overlapping	0	19.4137	39.5935
Chr7:146499-148697	7	146499	148697	0.018503662	EXOC2	ENSSSCG00000000985	exocyst complex component 2 [Source:HGNC Symbol;Acc:24968]	gene	overlapping	0	16.0778	34.5897
Chr12:5257041-5258847	12	5257041	5258847	0.017561477	EXOC7	ENSSSCG00000017190	Uncharacterized protein [Source:UniProtKB/TrEMBL;Acc:F1RW09]	gene	overlapping	0	31.3445	19.3726
Chr13:31071436-31078402	13	31071436	31078402	0.037903376	EXOSC7	ENSSSCG00000011300	exosome component 7 [Source:RefSeq peptide;Acc:NP_001230753]	gene	overlapping	0	9.82708	21.1769
Chr4:22124773-22129982	4	22124773	22129982	0.027493948	EXT1	ENSSSCG00000006009	Uncharacterized protein [Source:UniProtKB/TrEMBL;Acc:F1S274]	gene	overlapping	0	21.6736	9.26232
Chr17:55001731-55005705	17	55001731	55005705	0.017910684	EYA2	ENSSSCG00000007453	Uncharacterized protein [Source:UniProtKB/TrEMBL;Acc:F1SBF5]	gene	overlapping	0	14.5531	32.843
Chr11:86198723-86200108	11	86198723	86200108	0.023479214	F10	ENSSSCG00000009558	coagulation factor X protein [Source:RefSeq peptide;Acc:NP_001038057]	gene	overlapping	0	20.1637	2.88413
Chr11:86216361-86217627	11	86216361	86217627	0.01618038	F7	ENSSSCG00000029503	coagulation factor VII [Source:RefSeq peptide;Acc:NP_001038056]	gene	overlapping	0	19.1892	8.3339
Chr6:148957242-148965883	6	148957242	148965883	0.01762378	FAF1	ENSSSCG00000003877	Uncharacterized protein [Source:UniProtKB/TrEMBL;Acc:F1S6E6]	gene	overlapping	0	22.063	10.5206
Chr16:4431544-4436755	16	4431544	4436755	0.019328475	FAM105B	ENSSSCG00000016783	Uncharacterized protein [Source:UniProtKB/TrEMBL;Acc:F1SRN2]	gene	overlapping	0	16.1228	26.4307
Chr1:301929455-301933209	1	301929455	301933209	0.017762743	FAM129B	ENSSSCG00000005614	Uncharacterized protein [Source:UniProtKB/TrEMBL;Acc:F1RS15]	gene	overlapping	0	19.441	29.9425
Chr16:6177630-6186713	16	6177630	6186713	0.04833797	FAM134B	ENSSSCG00000016792	Uncharacterized protein [Source:UniProtKB/TrEMBL;Acc:F1SRM3]	gene	overlapping	0	15.9479	34.9368
Chr4:4283824-4286424	4	4283824	4286424	0.017803876	FAM135B	ENSSSCG00000005939	family with sequence similarity 135, member B [Source:HGNC Symbol;Acc:28029]	gene	overlapping	0	17.8185	8.6999
Chr13:147745117-147751474	13	147745117	147751474	0.03744537	FAM162A	ENSSSCG00000026990	hypothetical protein LOC100627352 [Source:RefSeq peptide;Acc:NP_001230502]	gene	overlapping	0	11.0561	24.8188
Chr10:51237986-51242855	10	51237986	51242855	0.018078173	FAM171A1	ENSSSCG00000011047	Uncharacterized protein [Source:UniProtKB/TrEMBL;Acc:F1RW85]	gene	overlapping	0	20.1211	8.67927
Chr13:206143650-206147697	13	206143650	206147697	0.03281161	FAM176C	ENSSSCG00000021598	family with sequence similarity 176, member C [Source:HGNC Symbol;Acc:13239]	gene	overlapping	0	13.9005	26.4053
Chr13:206147763-206151221	13	206147763	206151221	0.017803876	FAM176C	ENSSSCG00000021598	family with sequence similarity 176, member C [Source:HGNC Symbol;Acc:13239]	gene	overlapping	0	16.2761	3.63174
Chr8:12487721-12491719	8	12487721	12491719	0.014645071	FAM184B	ENSSSCG00000026232	Uncharacterized protein [Source:UniProtKB/TrEMBL;Acc:F1S5C6]	gene	overlapping	0	20.2851	6.61612
Chr9:113286975-113301716	9	113286975	113301716	0.023220595	FAM185A	ENSSSCG00000015414	Uncharacterized protein [Source:UniProtKB/TrEMBL;Acc:F1SB76]	gene	overlapping	0	13.917	28.2821
Chr3:41349809-41351592	3	41349809	41351592	0.027249651	FAM195A	ENSSSCG00000007995	Uncharacterized protein [Source:UniProtKB/TrEMBL;Acc:F1RGT4]	gene	overlapping	0	27.6674	38.1037
Chr13:217494168-217498101	13	217494168	217498101	0.027432026	FAM207A	ENSSSCG00000028571	family with sequence similarity 207, member A [Source:HGNC Symbol;Acc:15811]	gene	overlapping	0	24.4297	37.4553
Chr13:217502900-217504740	13	217502900	217504740	0.035315476	FAM207A	ENSSSCG00000028571	family with sequence similarity 207, member A [Source:HGNC Symbol;Acc:15811]	gene	overlapping	0	14.1464	34.1467
Chr13:217504749-217505587	13	217504749	217505587	0.024524823	FAM207A	ENSSSCG00000028571	family with sequence similarity 207, member A [Source:HGNC Symbol;Acc:15811]	gene	overlapping	0	27.7948	42.9447
Chr13:217520507-217521898	13	217520507	217521898	0.01446586	FAM207A	ENSSSCG00000028571	family with sequence similarity 207, member A [Source:HGNC Symbol;Acc:15811]	gene	upstream	185	5.02789	15.079
Chr3:129307056-129309463	3	129307056	129309463	0.04045562	FAM49A	ENSSSCG00000008617	Uncharacterized protein [Source:UniProtKB/TrEMBL;Acc:F2Z5E7]	gene	overlapping	0	3.36284	16.1209
Chr4:10855865-10912958	4	10855865	10912958	0.0186633	FAM49B	ENSSSCG00000005959	family with sequence similarity 49, member B [Source:RefSeq peptide;Acc:NP_001231368]	gene	overlapping	0	4.09683	15.2652
Chr14:145548101-145550041	14	145548101	145550041	0.017561477	FAM53B	ENSSSCG00000010732	Uncharacterized protein [Source:UniProtKB/TrEMBL;Acc:F1SDP5]	gene	overlapping	0	14.2999	2.44011
Chr14:145553718-145555859	14	145553718	145555859	0.023072999	FAM53B	ENSSSCG00000010732	Uncharacterized protein [Source:UniProtKB/TrEMBL;Acc:F1SDP5]	gene	overlapping	0	6.47223	18.3236
[truncated: 3,078 more rows]

## Sheet: DMRs Natur-IVF vs In vivo
Probe	Chromosome	Start	End	Q-value	Feature	ID	Description	Type	Orientation	Distance	Natur-IVF	In vivo
[truncated: 3,561 more rows]
