# Supplementary material for: DNA methylation and gene expression changes derived from assisted reproductive technologies can be decreased by reproductive fluids
Source: eLife. 2017 Feb 1;6:e23670. doi: 10.7554/eLife.23670 (PMC5340525; doi:10.7554/eLife.23670)
Supplement: Figure 5—source data 2. — DOI: http://dx.doi.org/10.7554/eLife.23670.014 [file elife-23670-fig5-data2.xlsx]

## Sheet: DMRs exclusive C-IVF
Feature	METHYLATION STATUS	% of DNA methylation
HTR4	C-IVF DOWN	10.684
ADAMTS14	C-IVF DOWN	7.37178
ADARB1	C-IVF DOWN	14.3657
AFF2	C-IVF DOWN	14.2987
LRP8	C-IVF DOWN	18.4369
ARMC2	C-IVF DOWN	9.76421
ATP8A1	C-IVF DOWN	2.79475
AXIN1	C-IVF DOWN	16.8855
AZI1	C-IVF DOWN	4.75174
NUGGC	C-IVF DOWN	6.42891
CACNA1E	C-IVF DOWN	7.43567
CD8B	C-IVF DOWN	8.74972
CDH6	C-IVF DOWN	8.25853
CHST11	C-IVF DOWN	11.0235
CLCN4	C-IVF DOWN	11.2688
COL4A4	C-IVF DOWN	12.8583
CPD	C-IVF DOWN	8.97424
CPXM2	C-IVF DOWN	5.36264
CREB1	C-IVF DOWN	2.28122
DENND3	C-IVF DOWN	13.6067
DPYS	C-IVF DOWN	9.30686
DTD1	C-IVF DOWN	10.9951
DTNBP1	C-IVF DOWN	23.1069
E2F8	C-IVF DOWN	6.80768
EBF3	C-IVF DOWN	9.25596
EEF1D	C-IVF DOWN	26.086
ELOVL2	C-IVF DOWN	14.1901
ENOX1	C-IVF DOWN	13.7932
FBXO33	C-IVF DOWN	10.0511
RSPH10B	C-IVF DOWN	8.07102
ENSSSCG00000009522	C-IVF DOWN	16.5373
TFDP1	C-IVF DOWN	14.7758
RASEF	C-IVF DOWN	8.92918
ENSSSCG00000014669	C-IVF DOWN	4.21433
RPTOR	C-IVF DOWN	10.7155
SIPA1L3	C-IVF DOWN	15.5389
ARMC9	C-IVF DOWN	5.96073
MAD1L1	C-IVF DOWN	19.7277
ICE1	C-IVF DOWN	17.1261
CCZ1B	C-IVF DOWN	20.8271
ENSSSCG00000026652	C-IVF DOWN	16.627
ENSSSCG00000026804	C-IVF DOWN	11.9739
EPS15L1	C-IVF DOWN	8.03681
EXOC2	C-IVF DOWN	8.72801
EYA2	C-IVF DOWN	14.5531
FBXO38	C-IVF DOWN	16.8217
FLT1	C-IVF DOWN	4.29456
IGF2R	C-IVF DOWN	12.4497
TGFBR3	C-IVF DOWN	6.57077
CNTFR	C-IVF DOWN	4.25169
JAK1	C-IVF DOWN	6.83223
FNDC3A	C-IVF DOWN	11.2049
GLP2R	C-IVF DOWN	7.08538
GMDS	C-IVF DOWN	4.88673
HCFC1	C-IVF DOWN	26.0702
HTT	C-IVF DOWN	19.8574
IGFBP7	C-IVF DOWN	3.56589
IL17A	C-IVF DOWN	4.93055
JAZF1	C-IVF DOWN	3.62413
KAL1	C-IVF DOWN	19.3371
KIAA0090	C-IVF DOWN	12.8191
KIF24	C-IVF DOWN	16.7955
LAMB1	C-IVF DOWN	4.39645
LRRC8A	C-IVF DOWN	9.64225
MCM4	C-IVF DOWN	10.0027
MED27	C-IVF DOWN	17.3056
MINOS1	C-IVF DOWN	10.2096
MMEL1	C-IVF DOWN	4.75689
MOV10L1	C-IVF DOWN	22.4381
MTHFSD	C-IVF DOWN	20.4524
MYO18A	C-IVF DOWN	8.32739
NARF	C-IVF DOWN	12.0443
NHS	C-IVF DOWN	4.74856
NLRP4	C-IVF DOWN	16.6767
NLRP8	C-IVF DOWN	7.81918
NLRX1	C-IVF DOWN	7.24252
NPLOC4	C-IVF DOWN	13.8042
ODZ2	C-IVF DOWN	13.6483
ODZ4	C-IVF DOWN	17.47
PHKA2	C-IVF DOWN	9.93431
POLR3H	C-IVF DOWN	14.8635
PTCH1	C-IVF DOWN	12.1128
RADIL	C-IVF DOWN	21.6614
RBBP7	C-IVF DOWN	9.4232
RIC3	C-IVF DOWN	8.91295
RNF32	C-IVF DOWN	7.7138
SCN4A	C-IVF DOWN	13.1035
SLC45A4	C-IVF DOWN	7.81707
SMYD3	C-IVF DOWN	2.2024
SSPN	C-IVF DOWN	5.25679
SYNGAP1	C-IVF DOWN	9.85814
SZT2	C-IVF DOWN	6.71773
TBC1D16	C-IVF DOWN	0.680744
TCOF1	C-IVF DOWN	10.0568
TMEM185A	C-IVF DOWN	7.37531
TMEM53	C-IVF DOWN	5.1386
TMPRSS9	C-IVF DOWN	27.1687
TTLL1	C-IVF DOWN	14.9382
VAT1L	C-IVF DOWN	14.6407
WDR4	C-IVF DOWN	16.0495
WDR65	C-IVF DOWN	5.53773
WDR65	C-IVF DOWN	4.6808
ZNF235	C-IVF DOWN	22.5637
ZNF707	C-IVF DOWN	13.4316
ZNF8	C-IVF DOWN	11.3996
ABCC9	C-IVF UP	18.8335
ACAN	C-IVF UP	16.1608
ADAMTS16	C-IVF UP	21.0593
AK3L1	C-IVF UP	20.7746
AMICA1	C-IVF UP	14.9394
AMOTL1	C-IVF UP	13.2158
ARAP1	C-IVF UP	37.1915
ARFGAP3	C-IVF UP	34.7215
BNC2	C-IVF UP	26.6053
TMEM260	C-IVF UP	24.8618
SBSPON	C-IVF UP	9.80087
CDC42BPB	C-IVF UP	44.5349
CDK7	C-IVF UP	26.7118
CMTM6	C-IVF UP	12.8495
COL4A4	C-IVF UP	27.2049
CPSF7	C-IVF UP	19.6388
CTDP1	C-IVF UP	27.1477
DIP2B	C-IVF UP	22.4938
DIP2B	C-IVF UP	16.7084
DSCAM	C-IVF UP	20.9909
DST	C-IVF UP	29.581
EFEMP1	C-IVF UP	25.8951
CES1	C-IVF UP	27.8893
ENSSSCG00000004082	C-IVF UP	26.0306
COL27A1	C-IVF UP	14.0563
ENSSSCG00000007025	C-IVF UP	23.6604
CCDC150	C-IVF UP	27.9848
RNF213	C-IVF UP	22.0919
TRAF3IP1	C-IVF UP	28.98
ENSSSCG00000026023	C-IVF UP	19.4275
FAM160A1	C-IVF UP	32.9091
ENSSSCG00000028410	C-IVF UP	19.2407
RALGAPA1	C-IVF UP	25.1398
ENSSSCG00000030081	C-IVF UP	34.4966
EVPL	C-IVF UP	40.4166
F10	C-IVF UP	20.1637
FAM184B	C-IVF UP	20.2851
FIGF	C-IVF UP	18.7478
FNIP1	C-IVF UP	21.2209
GRIA2	C-IVF UP	26.5569
GRIA4	C-IVF UP	26.5829
GTF2IRD1	C-IVF UP	19.6404
GUCY2C	C-IVF UP	12.901
INPP5D	C-IVF UP	22.0267
ITGBL1	C-IVF UP	38.7697
JAKMIP3	C-IVF UP	16.4564
KIF13B	C-IVF UP	27.0243
KIF22	C-IVF UP	22.2761
KIF5B	C-IVF UP	21.7972
LTA	C-IVF UP	34.4786
MAP3K1	C-IVF UP	24.4981
MYO5A	C-IVF UP	35.4806
NAGA	C-IVF UP	41.484
NMT2	C-IVF UP	21.4745
NOL4	C-IVF UP	21.8804
NPRL3	C-IVF UP	69.0703
NR5A2	C-IVF UP	13.4519
NT5DC3	C-IVF UP	24.6953
NXN	C-IVF UP	27.7477
ONECUT3	C-IVF UP	24.4642
PDCD6IP	C-IVF UP	22.416
PPP1R14D	C-IVF UP	21.2962
PPP2R5D	C-IVF UP	24.6491
PSMC3	C-IVF UP	33.9494
PTPN9	C-IVF UP	23.3917
RAB19	C-IVF UP	17.9556
RALYL	C-IVF UP	18.0101
RREB1	C-IVF UP	35.8516
RTN3	C-IVF UP	17.1891
SETX	C-IVF UP	28.7571
SPOCK3	C-IVF UP	16.8517
SYT14	C-IVF UP	20.131
THRB	C-IVF UP	23.2632
TNFRSF19	C-IVF UP	29.6352
TSSC1	C-IVF UP	49.2772
TXNDC11	C-IVF UP	21.2846
VAV2	C-IVF UP	31.1938
XKR9	C-IVF UP	33.6216

## Sheet: DMRs exclusive Natur-IVF
Feature	METHYLATION STATUS	% of DNA methylation
AARS2	NaturIVF DOWN	15.1576
ABR	NaturIVF DOWN	13.1813
ABTB2	NaturIVF DOWN	7.38877
ACTR5	NaturIVF DOWN	2.54561
ANK3	NaturIVF DOWN	6.81111
ARHGEF11	NaturIVF DOWN	13.9776
ASH1L	NaturIVF DOWN	6.61573
ATF6	NaturIVF DOWN	6.07843
BTBD9	NaturIVF DOWN	6.51177
CCDC85A	NaturIVF DOWN	4.54732
CENPF	NaturIVF DOWN	4.32823
CEP290	NaturIVF DOWN	6.60775
CHCHD3	NaturIVF DOWN	5.55184
CRISPLD2	NaturIVF DOWN	15.395
CSNK1A1	NaturIVF DOWN	6.57664
CTNNA2	NaturIVF DOWN	4.93551
DBNDD1	NaturIVF DOWN	16.9094
DKC1	NaturIVF DOWN	14.0995
DUSP14	NaturIVF DOWN	13.873
ENOX1	NaturIVF DOWN	14.9012
EPB41L2	NaturIVF DOWN	9.804
MRRF	NaturIVF DOWN	5.3691
XRRA1	NaturIVF DOWN	6.62505
NDUFS4	NaturIVF DOWN	2.48705
RALGAPA2	NaturIVF DOWN	3.91809
IFT88	NaturIVF DOWN	15.3326
ENSSSCG00000030112	NaturIVF DOWN	16.9721
NUP205	NaturIVF DOWN	3.84783
FANK1	NaturIVF DOWN	10.5839
FARP1	NaturIVF DOWN	7.19071
GFRAL	NaturIVF DOWN	7.62035
GLCE	NaturIVF DOWN	10.1467
GSK3B	NaturIVF DOWN	19.8203
IDE	NaturIVF DOWN	5.66461
LRRC48	NaturIVF DOWN	6.28463
MAGI3	NaturIVF DOWN	11.5044
MTAP	NaturIVF DOWN	10.8784
NR2C2	NaturIVF DOWN	6.43603
NSMAF	NaturIVF DOWN	12.6853
PHF20L1	NaturIVF DOWN	6.34895
RAD54B	NaturIVF DOWN	6.94475
RPL13A	NaturIVF DOWN	6.79126
RPSA	NaturIVF DOWN	8.78402
SLC13A5	NaturIVF DOWN	9.09159
SUMO2	NaturIVF DOWN	5.17772
TAOK3	NaturIVF DOWN	6.77265
TLE1	NaturIVF DOWN	4.70869
TRUB2	NaturIVF DOWN	15.0154
UHRF1BP1L	NaturIVF DOWN	7.15257
USP4	NaturIVF DOWN	10.7141
VPS13C	NaturIVF DOWN	11.5559
ZCCHC14	NaturIVF DOWN	14.1147
ABI3	NaturIVF UP	16.8744
ACTL6B	NaturIVF UP	28.9105
ADARB2	NaturIVF UP	28.263
ADORA1	NaturIVF UP	24.9261
AFAP1L1	NaturIVF UP	29.7879
AGAP3	NaturIVF UP	29.4392
ARMCX6	NaturIVF UP	24.3328
ATG3	NaturIVF UP	30.6953
BAIAP2	NaturIVF UP	36.118
BAIAP2	NaturIVF UP	41.2201
BTNL9	NaturIVF UP	31.4255
BZRAP1	NaturIVF UP	15.4094
C21orf56	NaturIVF UP	29.8071
CARM1	NaturIVF UP	22.3792
CCNF	NaturIVF UP	31.1442
CDH22	NaturIVF UP	29.4338
DHDPSL	NaturIVF UP	25.3777
DHX8	NaturIVF UP	20.1411
EMR1	NaturIVF UP	28.5399
ENPEP	NaturIVF UP	23.2577
PHACTR1	NaturIVF UP	26.5164
KIZ	NaturIVF UP	25.1544
ENSSSCG00000008117	NaturIVF UP	27.8971
SORCS2	NaturIVF UP	20.4017
ARHGEF7	NaturIVF UP	35.3779
TTC27	NaturIVF UP	22.7337
ASTN1	NaturIVF UP	29.5361
TECPR2	NaturIVF UP	38.8349
ENSSSCG00000024859	NaturIVF UP	31.5021
MAD1L1	NaturIVF UP	59.0243
ARMC9	NaturIVF UP	37.7007
LAMA3	NaturIVF UP	30.0367
TTLL12	NaturIVF UP	32.2027
RNU6-1	NaturIVF UP	12.906
ENSSSCG00000030517	NaturIVF UP	24.7123
EXOC2	NaturIVF UP	31.583
FAM193A	NaturIVF UP	29.7919
FAM53B	NaturIVF UP	17.7708
GPR137B	NaturIVF UP	26.2815
GRK4	NaturIVF UP	22.5241
HHAT	NaturIVF UP	37.4414
IFT140	NaturIVF UP	25.6948
JAKMIP3	NaturIVF UP	23.8455
KIAA1199	NaturIVF UP	10.9976
KNDC1	NaturIVF UP	31.464
LUC7L	NaturIVF UP	33.2324
MACROD1	NaturIVF UP	27.0912
MAGT1	NaturIVF UP	25.6644
MED13	NaturIVF UP	25.2568
MEF2D	NaturIVF UP	23.2248
NARFL	NaturIVF UP	39.0776
NEK6	NaturIVF UP	28.9126
NINL	NaturIVF UP	29.2072
NOTCH4	NaturIVF UP	10.6402
NPAS1	NaturIVF UP	33.7637
NUAK2	NaturIVF UP	11.5667
OLFM1	NaturIVF UP	19.7229
PARD6G	NaturIVF UP	24.9168
PDGFRB	NaturIVF UP	32.2434
PIP4K2A	NaturIVF UP	22.9311
POFUT2	NaturIVF UP	34.7114
POGZ	NaturIVF UP	24.3672
POU2F3	NaturIVF UP	32.0768
PPP1R12B	NaturIVF UP	18.1054
PPP2R2B	NaturIVF UP	24.3992
PRKCA	NaturIVF UP	26.1661
PRKG2	NaturIVF UP	13.7701
PTGES	NaturIVF UP	18.3565
PTPN13	NaturIVF UP	21.9095
PTPRM	NaturIVF UP	22.3558
RCOR1	NaturIVF UP	28.7793
RNF32	NaturIVF UP	36.2825
RUNX1	NaturIVF UP	21.7555
SHOX	NaturIVF UP	9.40957
SHROOM3	NaturIVF UP	22.5785
SORL1	NaturIVF UP	24.0919
STARD8	NaturIVF UP	22.8656
SUFU	NaturIVF UP	22.1404
TAF4	NaturIVF UP	33.6674
TBC1D22A	NaturIVF UP	30.9187
TBC1D22A	NaturIVF UP	33.0269
TBCD	NaturIVF UP	38.9244
TCF3	NaturIVF UP	40.5801
TCOF1	NaturIVF UP	48.5078
TCOF1	NaturIVF UP	45.67
TMED8	NaturIVF UP	25.8816
TNS1	NaturIVF UP	24.0088
TOX3	NaturIVF UP	30.1453
TPCN2	NaturIVF UP	35.6609
TSSC1	NaturIVF UP	37.4635
TTC38	NaturIVF UP	30.7772
TTC7B	NaturIVF UP	25.3516
URGCP	NaturIVF UP	28.829
UROC1	NaturIVF UP	32.9929
UVRAG	NaturIVF UP	26.0781
VPS28	NaturIVF UP	21.4489
WWC3	NaturIVF UP	39.8795
ZNHIT6	NaturIVF UP	40.2169
ZSCAN4	NaturIVF UP	35.4389

## Sheet: DMRs exclusive In vivo 
Feature	METHYLATION STATUS	% of DNA methylation
AFF2	IN VIVO UP	32.962
AKAP14	IN VIVO UP	24.6151
AMMECR1	IN VIVO UP	45.1969
ANK3	IN VIVO UP	25.2498
ANTXR2	IN VIVO UP	42.3342
AP2A2	IN VIVO UP	45.6895
ARFGAP3	IN VIVO UP	23.1958
ASXL1	IN VIVO UP	31.9531
ATP6V0A4	IN VIVO UP	28.1273
BDNF	IN VIVO UP	38.2327
BMPR2	IN VIVO UP	30.5846
BOD1L	IN VIVO UP	54.0598
C11orf58	IN VIVO UP	45.0668
PIG13	IN VIVO UP	30.423
CAPRIN1	IN VIVO UP	24.4352
CCNK	IN VIVO UP	21.7985
CDC73	IN VIVO UP	27.6693
CHRNA10	IN VIVO UP	33.32
CPE	IN VIVO UP	20.2546
CREBBP	IN VIVO UP	26.2748
CSMD2	IN VIVO UP	26.0059
DDX46	IN VIVO UP	24.7494
DOK7	IN VIVO UP	25.8259
DSCAML1	IN VIVO UP	28.8375
DYNC2H1	IN VIVO UP	26.3774
ENSSSCG00000001863	IN VIVO UP	21.4585
FGGY	IN VIVO UP	30.0337
EPB41L2	IN VIVO UP	20.11
SUN1	IN VIVO UP	35.4492
Doc2g	IN VIVO UP	32.2054
SPOCK1	IN VIVO UP	23.9922
RNF213	IN VIVO UP	18.9285
MIR505	IN VIVO UP	25.7758
ANKS1B	IN VIVO UP	32.6407
ENSSSCG00000024032	IN VIVO UP	25.0987
PRPF31	IN VIVO UP	27.3596
ENSSSCG00000024859	IN VIVO UP	25.1712
TMTC2	IN VIVO UP	49.2854
CCDC169-SOHLH2	IN VIVO UP	36.9375
DAPP1	IN VIVO UP	23.2041
ENSSSCG00000027031	IN VIVO UP	19.7415
COG3	IN VIVO UP	17.8871
ENSSSCG00000028677	IN VIVO UP	16.5705
MRPL22	IN VIVO UP	31.4948
RNU6-1	IN VIVO UP	41.6508
EPS8L3	IN VIVO UP	27.4687
ERI3	IN VIVO UP	18.7803
FBLN5	IN VIVO UP	31.7536
FBXO5	IN VIVO UP	28.592
FNDC1	IN VIVO UP	39.3832
GATA3	IN VIVO UP	13.9926
GOLGB1	IN VIVO UP	27.8223
GRID1	IN VIVO UP	30.4174
HCFC1	IN VIVO UP	51.542
HHAT	IN VIVO UP	23.4401
HS3ST2	IN VIVO UP	19.4456
IMPG1	IN VIVO UP	24.4398
IRS1	IN VIVO UP	34.551
ISPD	IN VIVO UP	27.4863
ITGAV	IN VIVO UP	25.8442
JAG1	IN VIVO UP	22.8709
KCTD5	IN VIVO UP	65.3406
KHDRBS3	IN VIVO UP	28.7512
KIAA0284	IN VIVO UP	33.7901
LARP4B	IN VIVO UP	31.5014
LARP7	IN VIVO UP	26.2207
LIG4	IN VIVO UP	45.6158
LIPC	IN VIVO UP	33.5214
LRRC16A	IN VIVO UP	24.3962
MACF1	IN VIVO UP	32.2895
MACF1	IN VIVO UP	18.2876
MAP3K1	IN VIVO UP	21.4281
MID1	IN VIVO UP	43.8629
MKL1	IN VIVO UP	33.7223
MLH1	IN VIVO UP	31.9611
MPP1	IN VIVO UP	39.3091
MYEOV2	IN VIVO UP	48.6829
MYO18B	IN VIVO UP	17.0264
MYPN	IN VIVO UP	25.4889
NARS2	IN VIVO UP	30.2669
NF1	IN VIVO UP	25.3304
NFATC2	IN VIVO UP	31.1338
NHSL1	IN VIVO UP	24.8006
NR2F6	IN VIVO UP	26.4599
PACSIN2	IN VIVO UP	28.3669
PAIP1	IN VIVO UP	19.1454
PAPOLA	IN VIVO UP	25.2968
PCLO	IN VIVO UP	36.2541
PDGFA	IN VIVO UP	23.7946
PDGFD	IN VIVO UP	14.408
PDIK1L	IN VIVO UP	25.1482
PDLIM5	IN VIVO UP	26.4279
PLXNC1	IN VIVO UP	35.312
PPAT	IN VIVO UP	33.9514
PRKG2	IN VIVO UP	21.0527
PRSS35	IN VIVO UP	46.6805
PTPN21	IN VIVO UP	25.9058
PTPRB	IN VIVO UP	27.2555
PYGO1	IN VIVO UP	24.6601
RAB3GAP1	IN VIVO UP	28.266
RAB9A	IN VIVO UP	30.0871
RALGPS2	IN VIVO UP	33.4719
RBPMS	IN VIVO UP	19.1335
RDX	IN VIVO UP	22.6197
RRP15	IN VIVO UP	39.0189
RRP15	IN VIVO UP	35.2197
SALL1	IN VIVO UP	18.0473
SALL4	IN VIVO UP	22.2317
SCN8A	IN VIVO UP	32.7714
SCUBE1	IN VIVO UP	29.3116
SHROOM2	IN VIVO UP	33.4183
SRPX2	IN VIVO UP	18.6918
STS	IN VIVO UP	26.3055
SULF2	IN VIVO UP	35.7504
SYT1	IN VIVO UP	23.0194
TAGAP	IN VIVO UP	33.0482
TCERG1	IN VIVO UP	23.5191
TMEM125	IN VIVO UP	24.9727
CD28	IN VIVO UP	23.6292
TRPC5	IN VIVO UP	27.4328
TUBGCP6	IN VIVO UP	34.9623
RNU2-1	IN VIVO UP	38.7254
USP6NL	IN VIVO UP	21.0341
WIPI2	IN VIVO UP	37.8526
ZFP3	IN VIVO UP	36.9118
ZMYND8	IN VIVO UP	25.4023
ZMYND8	IN VIVO UP	16.4207
ZNF200	IN VIVO UP	32.1378
ZNF250	IN VIVO UP	16.007
ZNF608	IN VIVO UP	36.2015
ZNF609	IN VIVO UP	31.2512
ACTN4	IN VIVO DOWN	16.6506
ARAP1	IN VIVO DOWN	2.56118
APOPT1	IN VIVO DOWN	20.6081
RABL6	IN VIVO DOWN	11.6656
CADPS2	IN VIVO DOWN	15.0984
CEPT1	IN VIVO DOWN	7.09635
CHMP1A	IN VIVO DOWN	14.4963
CLPB	IN VIVO DOWN	15.1784
CNGB1	IN VIVO DOWN	9.43006
COL6A5	IN VIVO DOWN	8.67269
DCX	IN VIVO DOWN	2.66422
DIAPH1	IN VIVO DOWN	13.8683
EIF4E	IN VIVO DOWN	9.38246
HMCN2	IN VIVO DOWN	12.0748
ENSSSCG00000012158	IN VIVO DOWN	1.17347
ENSSSCG00000013942	IN VIVO DOWN	12.6465
ENSSSCG00000017576	IN VIVO DOWN	6.66442
SLC44A3	IN VIVO DOWN	3.44637
MAD1L1	IN VIVO DOWN	40.9556
ENSSSCG00000026652	IN VIVO DOWN	9.06423
EXT1	IN VIVO DOWN	9.26232
FRMD4A	IN VIVO DOWN	21.7151
GALNTL5	IN VIVO DOWN	4.15544
GMDS	IN VIVO DOWN	18.7133
H2AFY	IN VIVO DOWN	6.38931
INPP4A	IN VIVO DOWN	23.2682
LIMCH1	IN VIVO DOWN	7.14248
MTM1	IN VIVO DOWN	7.34328
MUSK	IN VIVO DOWN	13.0769
NOS1	IN VIVO DOWN	7.46035
NPRL3	IN VIVO DOWN	11.4626
NPSR1	IN VIVO DOWN	30.0534
NUDT2	IN VIVO DOWN	8.99812
NUP214	IN VIVO DOWN	7.5306
ODZ4	IN VIVO DOWN	5.83365
PPP1R7	IN VIVO DOWN	8.41102
RADIL	IN VIVO DOWN	14.6467
REV3L	IN VIVO DOWN	10.3209
RHBDL2	IN VIVO DOWN	9.10608
RNF32	IN VIVO DOWN	21.1597
SLC17A5	IN VIVO DOWN	14.4824
SLC22A8	IN VIVO DOWN	3.34445
SLC4A2	IN VIVO DOWN	11.6138
SNORD112	IN VIVO DOWN	4.40267
SRPK3	IN VIVO DOWN	3.76912
STIM1	IN VIVO DOWN	7.7846
TNS4	IN VIVO DOWN	1.50044
RNU6-1	IN VIVO DOWN	7.25264
UVRAG	IN VIVO DOWN	12.1145
VAV2	IN VIVO DOWN	11.9632
ZDHHC20	IN VIVO DOWN	15.6011
